# Supplementary material
Source: PubMed Central journal article supplement (PMC5315576)
Supplement: NIHMS840803-supplement-Supplemental_Tables_1-24.pdf [file NIHMS840803-supplement-Supplemental_Tables_1-24.pdf]

## **Supplementary Table 1. List of curated cancer genes**

### **Cancer Gene List**

ABCB1  
ABCB11  
ABCC2  
ABCC4  
ABL1  
ABL2  
ACO1  
ACVR1B  
ACVR2A  
ACVR2B  
ADNP  
AJUBA  
AKT1  
AKT2  
AKT3  
ALK  
ALKBH6  
ALOX12B  
ALPK2  
AMER1  
APC  
APCDD1  
APITD1  
APOL2  
AR  
ARAF  
ARFRP1  
ARHGAP35  
ARID1A  
ARID1B  
ARID2  
ARID5B  
ARL11  
ASXL1  
ASXL2  
ASXL3  
ATM  
ATP5B  
ATR

ATRIP  
ATRX  
AURKA  
AURKB  
AXIN1  
AXIN2  
AXL  
AZGP1  
B2M  
B4GALT3  
BACH1  
BAK1  
BAP1  
BARD1  
BCL2  
BCL2L11  
BCL2L2  
BCL6  
BCLAF1  
BCOR  
BCORL1  
BCR  
BLM  
BMPR1A  
BRAF  
BRCA1  
BRCA2  
BRE  
BRIP1  
BRWD3  
BTG1  
BTK  
BUB1B  
C11orf30  
CAP2  
CARD11  
CASP8  
CBFB  
CBL  
CBLB  
CBLC

CCND1  
CCND2  
CCND3  
CCNE1  
CD1D  
CD70  
CD79A  
CD79B  
CDC27  
CDC73  
CDH1  
CDH12  
CDH18  
CDK12  
CDK4  
CDK6  
CDK8  
CDKN1A  
CDKN1B  
CDKN2A  
CDKN2B  
CDKN2C  
CEBPA  
CENPL  
CEP76  
CERS2  
CHD4  
CHD8  
CHEK1  
CHEK2  
CHUK  
CIC  
CNBD1  
CNKSR1  
COL7A1  
COMT  
CRBN  
CREBBP  
CRIPAK  
CRKL  
CRLF2

CSF1R  
CTCF  
CTNNA1  
CTNNB1  
CUL4A  
CUL4B  
CUX1  
CYLD  
CYP17A1  
CYP1B1  
CYP2C19  
CYP2C8  
CYP2D6  
CYP3A4  
CYP3A5  
DAXX  
DCAF6  
DDB2  
DDR1  
DDR2  
DDX11  
DDX3X  
DDX5  
DIAPH1  
DICER1  
DIDO1  
DIS3  
DIS3L2  
DKC1  
DLC1  
DNER  
DNMT1  
DNMT3A  
DOCK8  
DOT1L  
DPYD  
ECSCR  
EGFR  
EGR3  
EIF2S2  
EIF3A

EIF4A2  
ELANE  
ELF3  
EME1  
EME2  
EML4  
EP300  
EPHA2  
EPHA3  
EPHA5  
EPHB1  
EPHB2  
EPHB6  
EPPK1  
ERBB2  
ERBB3  
ERBB4  
ERCC1  
ERCC2  
ERCC3  
ERCC4  
ERCC5  
ERG  
ESR1  
ESR2  
ETV1  
ETV4  
ETV5  
ETV6  
EWSR1  
EXO1  
EXT1  
EXT2  
EZH1  
EZH2  
EZR  
FAH  
FAM129B  
FAM46C  
FANCA  
FANCB

FANCC  
FANCD2  
FANCE  
FANCF  
FANCG  
FANCI  
FANCL  
FANCM  
FAS  
FAT1  
FAT3  
FBXW7  
FCGR1A  
FCGR2A  
FCGR3A  
FGF10  
FGF12  
FGF14  
FGF19  
FGF23  
FGF3  
FGF4  
FGF6  
FGF7  
FGFBP1  
FGFR1  
FGFR2  
FGFR3  
FGFR4  
FH  
FLCN  
FLT1  
FLT3  
FLT4  
FOXA1  
FOXA2  
FOXL2  
FOXQ1  
FUBP1  
FZD1  
GAB2

GATA1  
GATA2  
GATA3  
GBA  
GID4  
GJB2  
GNA11  
GNA13  
GNAQ  
GNAS  
GNB1  
GPC3  
GPR124  
GPS2  
GRIN2A  
GRM3  
GSK3B  
GSTP1  
GUCY1A2  
H3F3A  
H3F3C  
HAUS3  
HDAC4  
HES1  
HFE  
HGF  
HIF1A  
HIST1H1C  
HIST1H1E  
HIST1H2BD  
HIST1H3B  
HIST1H4E  
HLA-A  
HLA-B  
HLA-G  
HMBS  
HNF1A  
HRAS  
HSP90AB1  
IDH1  
IDH2

IGF1  
IGF1R  
IGF2  
IKBKE  
IKZF1  
IL7R  
ING1  
INHA  
INHBA  
INPPL1  
IPO7  
IRF4  
IRS2  
ITGAV  
ITK  
ITPA  
JAK1  
JAK2  
JAK3  
JUN  
KAT6A  
KDM5A  
KDM5C  
KDM6A  
KDR  
KEAP1  
KIF5B  
KIT  
KLF4  
KLHL6  
KMT2A  
KMT2B  
KMT2C  
KMT2D  
KRAS  
LIFR  
LMO1  
LRP1B  
LRP2  
LRRK2  
MALAT1



MAN1B1  
MAP2K1  
MAP2K2  
MAP2K4  
MAP3K1  
MAP3K13  
MAP3K15  
MAP4K1  
MAP4K3  
MAPK1  
MAPK8IP1  
MAX  
MBD1  
MC1R  
MCL1  
MDM2  
MDM4  
MECOM  
MED12  
MED23  
MEF2A  
MEF2B  
MEN1  
MET  
MGA  
MIR142  
MITF  
MLH1  
MNDA  
MORC4  
MPL  
MRE11A  
MSH2  
MSH6  
MTAP  
MTHFR  
MTOR  
MUTYH  
MXRA5  
MYB  
MYC

MYCL  
MYCN  
MYD88  
MYLK  
NAV3  
NBN  
NBPF1  
NCOR1  
NEIL1  
NF1  
NF2  
NFE2L2  
NFKBIA  
NKX2-1  
NOTCH1  
NOTCH2  
NOTCH3  
NOTCH4  
NPM1  
NQO1  
NRAS  
NRP2  
NSD1  
NTN4  
NTRK1  
NTRK2  
NTRK3  
NUP93  
ODAM  
OTUD7A  
PAK3  
PAK7  
PALB2  
PAPD5  
PARP1  
PARP2  
PARP3  
PARP4  
PAX5  
PBRM1  
PCBP1

PCDH10  
PDAP1  
PDCD2L  
PDGFRA  
PDGFRB  
PDK1  
PDSS2  
PHF6  
PHOX2B  
PIK3C2G  
PIK3C3  
PIK3CA  
PIK3CG  
PIK3R1  
PIK3R2  
PLCG2  
PML  
PMS2  
PMS2CL  
PNRC1  
POLD1  
POLE  
POLH  
POLI  
POLK  
POLQ  
PORCN  
POU2AF1  
POU2F2  
PPM1D  
PPP2R1A  
PPP6C  
PRDM1  
PRKAR1A  
PRKDC  
PRLR  
PRPF40B  
PRSS1  
PRSS8  
PTCH1  
PTEN

PTPN11  
PTPRC  
PTPRD  
QKI  
RAB40A  
RAC1  
RAD21  
RAD50  
RAD51  
RAD51B  
RAD51C  
RAD51D  
RAD52  
RAD54L  
RAF1  
RALY  
RARA  
RASA1  
RB1  
RBM10  
RBMX  
RECQL4  
REL  
RET  
REV3L  
RHBDF2  
RHEB  
RHOA  
RICTOR  
RIT1  
RMI1  
RMI2  
RMRP  
RNF43  
ROS1  
RPA1  
RPA2  
RPA4  
RPL22  
RPL5  
RPS14

RPS15  
RPS2  
RPTOR  
RUNX1  
RUNX1T1  
RUNX3  
RXRA  
SBDS  
SDHA  
SDHAF2  
SDHB  
SDHC  
SDHD  
SERPINA1  
SERPINB13  
SETBP1  
SETD2  
SETDB1  
SF1  
SF3B1  
SGK1  
SH2B3  
SH2D1A  
SIN3A  
SIRPA  
SIRT4  
SLC19A1  
SLC22A2  
SLC25A13  
SLCO1B3  
SLX4  
SMAD2  
SMAD3  
SMAD4  
SMARCA4  
SMARCB1  
SMARCD1  
SMARCE1  
SMC1A  
SMC3  
SMO

SNX25  
SOCS1  
SOD2  
SOS1  
SOX10  
SOX17  
SOX2  
SOX9  
SPEN  
SPOP  
SPRY4  
SRC  
SRSF2  
SRY  
STAG2  
STAT3  
STAT4  
STK11  
STK19  
STK38  
STX2  
SUFU  
SULT1A1  
SUZ12  
SYK  
SZRD1  
TAF1  
TBC1D12  
TBL1XR1  
TBX3  
TCEB1  
TCF7L2  
TELO2  
TERT  
TET2  
TFG  
TGFB1  
TGFB2  
TIMM17A  
TIPARP  
TLK2

TLR4  
TMEM127  
TMPRSS2  
TNF  
TNFAIP3  
TNFRSF14  
TOP1  
TOP3A  
TOP3B  
TP53  
TP53BP1  
TPMT  
TPX2  
TRAF3  
TRAF7  
TRIM37  
TRRAP  
TSC1  
TSC2  
TSHR  
TSHZ2  
TSHZ3  
TYMS  
TYR  
U2AF1  
U2AF2  
UGT1A1  
UMPS  
UROD  
USP1  
USP9X  
VANGL2  
VEZF1  
VHL  
WAC  
WAS  
WASF3  
WDR48  
WISP3  
WNK1  
WRN

WT1  
XPA  
XPC  
XPO1  
XRCC2  
XRCC3  
ZFHX3  
ZNF217  
ZNF703  
ZRANB3  
ZRSR2



**Supplementary Table 2. Gene, pair, and cluster counts at varying proximity pair significance levels and by cancer gene category.**

|                 | Pair Proximity P-Value | All Genes     |       |          | Cancer Genes  |       |          |
|-----------------|------------------------|---------------|-------|----------|---------------|-------|----------|
|                 |                        | Genes (drugs) | Pairs | Clusters | Genes (Drugs) | Pairs | Clusters |
| Intra-Molecular | No Cutoff              | 3060          | 47888 | 5865     | 280           | 10492 | 632      |
|                 | 0.05                   | 2519          | 14991 | 5822     | 244           | 3271  | 698      |
|                 | 0.01                   | 1021          | 1890  | 1592     | 125           | 388   | 277      |
| Inter-Molecular | No Cutoff              | 986           | 5037  | 655      | 149           | 1818  | 172      |
|                 | 0.05                   | 732           | 1495  | 488      | 127           | 535   | 156      |
|                 | 0.01                   | 253           | 183   | 154      | 47            | 61    | 52       |
| Drug-Mutation   | No Cutoff              | 499 (175)     | 5766  | 533      | 60 (36)       | 1399  | 64       |
|                 | 0.05                   | 359 (153)     | 2057  | 394      | 49 (34)       | 506   | 55       |
|                 | 0.01                   | 105 (44)      | 297   | 108      | 16 (10)       | 67    | 16       |

Supplementary Table 3. Intra-molecular clusters with annotations

| Cluster ID | Gene  | Transcript (Ensembl74) | HGVS Protein Annotation | HGVS Coding Position | Closeness Centrality | Geodesic from Centroid | No. of Patient Samples |
|------------|-------|------------------------|-------------------------|----------------------|----------------------|------------------------|------------------------|
| 0          | PRKCB | ENST00000303531        | p.P505T                 | c.1513               | 0.164407126          | 4.49                   | 1                      |
| 0          | PRKCB | ENST00000303531        | p.A509V                 | c.1526               | 0.091650685          | 6.905                  | 1                      |
| 0          | PRKCB | ENST00000303531        | p.D523N                 | c.1567               | 0.054376828          | 9.68                   | 1                      |
| 0          | PRKCB | ENST00000303531        | p.A539T                 | c.1615               | 0.102076566          | 8.131                  | 1                      |
| 0          | PRKCB | ENST00000303531        | p.P540S                 | c.1618               | 1.114376516          | 0                      | 1                      |
| 0          | PRKCB | ENST00000303531        | p.P540H                 | c.1619               | 1.114376516          | 0                      | 1                      |
| 0          | PRKCB | ENST00000303531        | p.S552F                 | c.1655               | 0.107943184          | 9.145                  | 1                      |
| 0          | PRKCB | ENST00000303531        | p.L575P                 | c.1724               | 0.22202754           | 4.185                  | 1                      |
| 1          | KCNK1 | ENST00000366621        | p.V139I                 | c.415                | 0.010293334          | 0                      | 1                      |
| 1          | KCNK1 | ENST00000366621        | p.F216L                 | c.646                | 0.004578212          | 7.771                  | 1                      |
| 1          | KCNK1 | ENST00000366621        | p.I226V                 | c.676                | 0.010180647          | 7.451                  | 1                      |
| 2          | PEPD  | ENST00000244137        | p.A74V                  | c.221                | 1.058233777          | 0                      | 2                      |
| 2          | PEPD  | ENST00000244137        | p.A122V                 | c.365                | 0.116467554          | 4.102                  | 1                      |
| 3          | C8B   | ENST00000371237        | p.R539W                 | c.1615               | 1.090388832          | 0                      | 1                      |
| 3          | C8B   | ENST00000371237        | p.R539Q                 | c.1616               | 1.090388832          | 0                      | 1                      |
| 3          | C8B   | ENST00000371237        | p.P573L                 | c.1718               | 0.011438169          | 7.45                   | 1                      |
| 3          | C8B   | ENST00000371237        | p.R284Q                 | c.851                | 1.030878067          | 6.741                  | 2                      |
| 3          | C8B   | ENST00000371237        | p.H287R                 | c.860                | 0.131944215          | 3.922                  | 1                      |
| 4          | DDB1  | ENST00000301764        | p.G832S                 | c.2494               | 0.088818253          | 3.493                  | 1                      |
| 4          | DDB1  | ENST00000301764        | p.V870A                 | c.2609               | 0.088818253          | 0                      | 1                      |
| 5          | ITGB3 | ENST00000559488        | p.E338K                 | c.1012               | 0.07307506           | 6.247                  | 1                      |
| 5          | ITGB3 | ENST00000559488        | p.D362Y                 | c.1084               | 0.479073898          | 1.737                  | 1                      |
| 5          | ITGB3 | ENST00000559488        | p.S363T                 | c.1087               | 0.555731398          | 1.324                  | 1                      |
| 5          | ITGB3 | ENST00000559488        | p.N365S                 | c.1094               | 0.087053218          | 4.287                  | 1                      |
| 5          | ITGB3 | ENST00000559488        | p.S156I                 | c.467                | 0.763810449          | 0                      | 1                      |
| 6          | XDH   | ENST00000379416        | p.T662I                 | c.1985               | 0.171464623          | 7.177                  | 1                      |
| 6          | XDH   | ENST00000379416        | p.P1216S                | c.3646               | 1.006910472          | 0                      | 2                      |
| 7          | ATRX  | ENST00000373344        | p.C220W                 | c.660                | 0.239483805          | 2.062                  | 1                      |
| 7          | ATRX  | ENST00000373344        | p.Y266N                 | c.796                | 0.239483805          | 0                      | 1                      |
| 8          | BMP2  | ENST00000374580        | p.E386G                 | c.1157               | 0.168992776          | 0                      | 1                      |
| 8          | BMP2  | ENST00000374580        | p.V453L                 | c.1357               | 0.024213718          | 6.669                  | 1                      |
| 8          | BMP2  | ENST00000374580        | p.E489D                 | c.1467               | 0.010544463          | 6.769                  | 1                      |
| 8          | BMP2  | ENST00000374580        | p.R491W                 | c.1471               | 0.156518946          | 2.737                  | 1                      |
| 9          | CUBN  | ENST00000377833        | p.E975K                 | c.2923               | 1.010807792          | 9.188                  | 1                      |
| 9          | CUBN  | ENST00000377833        | p.E975Q                 | c.2923               | 1.010807792          | 9.188                  | 1                      |
| 9          | CUBN  | ENST00000377833        | p.P1010L                | c.3029               | 0.072171818          | 6.423                  | 1                      |
| 9          | CUBN  | ENST00000377833        | p.S1012F                | c.3035               | 0.428702433          | 2.423                  | 1                      |
| 9          | CUBN  | ENST00000377833        | p.T1014K                | c.3041               | 0.078898707          | 7.8                    | 1                      |
| 9          | CUBN  | ENST00000377833        | p.R1077L                | c.3230               | 0.10286569           | 6.399                  | 1                      |
| 9          | CUBN  | ENST00000377833        | p.E1115K                | c.3343               | 1.223845913          | 0                      | 2                      |
| 9          | CUBN  | ENST00000377833        | p.P1182R                | c.3545               | 0.04730422           | 7.391                  | 1                      |
| 10         | UXS1  | ENST00000283148        | p.R95I                  | c.284                | 0.005727019          | 7.448                  | 1                      |
| 10         | UXS1  | ENST00000283148        | p.R201H                 | c.602                | 0.058304156          | 0                      | 1                      |
| 10         | UXS1  | ENST00000283148        | p.V256M                 | c.766                | 0.020263118          | 5.625                  | 1                      |
| 10         | UXS1  | ENST00000283148        | p.L317I                 | c.949                | 0.022971677          | 5.444                  | 1                      |
| 10         | UXS1  | ENST00000283148        | p.V322I                 | c.964                | 0.014786785          | 6.742                  | 1                      |
| 11         | TP53  | ENST00000269305        | p.Q104H                 | c.312                | 5.400866919          | 9.939                  | 1                      |

|    |      |                 |                      |           |             |       |   |
|----|------|-----------------|----------------------|-----------|-------------|-------|---|
| 11 | TP53 | ENST00000269305 | p.G105C              | c.313     | 12.83362803 | 7.757 | 2 |
| 11 | TP53 | ENST00000269305 | p.G105R              | c.313     | 12.83362803 | 7.757 | 2 |
| 11 | TP53 | ENST00000269305 | p.G105S              | c.313     | 12.83362803 | 7.757 | 1 |
| 11 | TP53 | ENST00000269305 | p.G105D              | c.314     | 12.83362803 | 7.757 | 1 |
| 11 | TP53 | ENST00000269305 | p.S106R              | c.318     | 13.98003045 | 8.258 | 1 |
| 11 | TP53 | ENST00000269305 | p.Y107D              | c.319     | 12.60192522 | 8.855 | 2 |
| 11 | TP53 | ENST00000269305 | p.Y107C              | c.320     | 12.60192522 | 8.855 | 1 |
| 11 | TP53 | ENST00000269305 | p.L111M              | c.331     | 7.555025923 | 8.656 | 1 |
| 11 | TP53 | ENST00000269305 | p.L111P              | c.332     | 7.555025923 | 8.656 | 1 |
| 11 | TP53 | ENST00000269305 | p.L111Q              | c.332     | 7.555025923 | 8.656 | 1 |
| 11 | TP53 | ENST00000269305 | p.L111R              | c.332     | 7.555025923 | 8.656 | 1 |
| 11 | TP53 | ENST00000269305 | p.F113V              | c.337     | 7.767972993 | 8.585 | 1 |
| 11 | TP53 | ENST00000269305 | p.F113C              | c.338     | 7.767972993 | 8.585 | 2 |
| 11 | TP53 | ENST00000269305 | p.F113L              | c.339     | 7.767972993 | 8.585 | 1 |
| 11 | TP53 | ENST00000269305 | p.F113in_frame_del   | c.341_339 | 7.767972993 | 8.585 | 1 |
| 11 | TP53 | ENST00000269305 | p.FLH113in_frame_del | c.344_336 | 7.767972993 | 8.585 | 1 |
| 11 | TP53 | ENST00000269305 | p.K120E              | c.358     | 7.595218439 | 8.898 | 1 |
| 11 | TP53 | ENST00000269305 | p.C124G              | c.370     | 3.95442853  | 5.844 | 1 |
| 11 | TP53 | ENST00000269305 | p.T125P              | c.373     | 13.98846025 | 6.475 | 2 |
| 11 | TP53 | ENST00000269305 | p.T125M              | c.374     | 13.98846025 | 6.475 | 2 |
| 11 | TP53 | ENST00000269305 | p.Y126D              | c.376     | 13.42486793 | 8.443 | 1 |
| 11 | TP53 | ENST00000269305 | p.Y126N              | c.376     | 13.42486793 | 8.443 | 1 |
| 11 | TP53 | ENST00000269305 | p.Y126C              | c.377     | 13.42486793 | 8.443 | 2 |
| 11 | TP53 | ENST00000269305 | p.Y126S              | c.377     | 13.42486793 | 8.443 | 1 |
| 11 | TP53 | ENST00000269305 | p.S127P              | c.379     | 19.57954726 | 9.053 | 2 |
| 11 | TP53 | ENST00000269305 | p.S127C              | c.380     | 19.57954726 | 9.053 | 1 |
| 11 | TP53 | ENST00000269305 | p.S127F              | c.380     | 19.57954726 | 9.053 | 4 |
| 11 | TP53 | ENST00000269305 | p.S127Y              | c.380     | 19.57954726 | 9.053 | 4 |
| 11 | TP53 | ENST00000269305 | p.L130F              | c.388     | 11.85161775 | 7.594 | 4 |
| 11 | TP53 | ENST00000269305 | p.L130V              | c.388     | 11.85161775 | 7.594 | 2 |
| 11 | TP53 | ENST00000269305 | p.L130P              | c.389     | 11.85161775 | 7.594 | 1 |
| 11 | TP53 | ENST00000269305 | p.PAL128in_frame_del | c.390_382 | 5.790500811 | 9.226 | 1 |
| 11 | TP53 | ENST00000269305 | p.K132E              | c.394     | 39.90153437 | 3.369 | 3 |
| 11 | TP53 | ENST00000269305 | p.K132M              | c.395     | 39.90153437 | 3.369 | 1 |
| 11 | TP53 | ENST00000269305 | p.K132R              | c.395     | 39.90153437 | 3.369 | 3 |
| 11 | TP53 | ENST00000269305 | p.K132T              | c.395     | 39.90153437 | 3.369 | 2 |
| 11 | TP53 | ENST00000269305 | p.K132N              | c.396     | 39.90153437 | 3.369 | 9 |
| 11 | TP53 | ENST00000269305 | p.M133K              | c.398     | 48.41880559 | 1.841 | 3 |
| 11 | TP53 | ENST00000269305 | p.F134L              | c.400     | 26.92128345 | 3.171 | 2 |
| 11 | TP53 | ENST00000269305 | p.F134V              | c.400     | 26.92128345 | 3.171 | 1 |
| 11 | TP53 | ENST00000269305 | p.C135F              | c.404     | 46.52115393 | 2.086 | 2 |
| 11 | TP53 | ENST00000269305 | p.C135S              | c.404     | 46.52115393 | 2.086 | 1 |
| 11 | TP53 | ENST00000269305 | p.C135Y              | c.404     | 46.52115393 | 2.086 | 3 |
| 11 | TP53 | ENST00000269305 | p.C135W              | c.405     | 46.52115393 | 2.086 | 2 |
| 11 | TP53 | ENST00000269305 | p.Q136E              | c.406     | 14.95835856 | 5.373 | 3 |
| 11 | TP53 | ENST00000269305 | p.Q136P              | c.407     | 14.95835856 | 5.373 | 1 |
| 11 | TP53 | ENST00000269305 | p.Q136H              | c.408     | 14.95835856 | 5.373 | 1 |
| 11 | TP53 | ENST00000269305 | p.L137Q              | c.410     | 18.33718489 | 6.413 | 1 |
| 11 | TP53 | ENST00000269305 | p.A138T              | c.412     | 12.66526936 | 6.762 | 1 |

|    |      |                 |                        |           |             |       |    |
|----|------|-----------------|------------------------|-----------|-------------|-------|----|
| 11 | TP53 | ENST00000269305 | p.A138V                | c.413     | 12.66526936 | 6.762 | 1  |
| 11 | TP53 | ENST00000269305 | p.K139N                | c.417     | 9.582713075 | 7.722 | 2  |
| 11 | TP53 | ENST00000269305 | p.C141R                | c.421     | 19.96405103 | 7.959 | 2  |
| 11 | TP53 | ENST00000269305 | p.C141S                | c.422     | 19.96405103 | 7.959 | 1  |
| 11 | TP53 | ENST00000269305 | p.C141Y                | c.422     | 19.96405103 | 7.959 | 5  |
| 11 | TP53 | ENST00000269305 | p.C141W                | c.423     | 19.96405103 | 7.959 | 3  |
| 11 | TP53 | ENST00000269305 | p.KTCP139in_frame_delT | c.424_416 | 9.582713075 | 7.722 | 1  |
| 11 | TP53 | ENST00000269305 | p.AKTCP138in_frame_del | c.425_411 | 12.66526936 | 6.762 | 1  |
| 11 | TP53 | ENST00000269305 | p.KTCP139in_frame_del  | c.425_414 | 9.582713075 | 7.722 | 1  |
| 11 | TP53 | ENST00000269305 | p.V143M                | c.427     | 11.92536866 | 8.894 | 2  |
| 11 | TP53 | ENST00000269305 | p.V143A                | c.428     | 11.92536866 | 8.894 | 1  |
| 11 | TP53 | ENST00000269305 | p.V143E                | c.428     | 11.92536866 | 8.894 | 1  |
| 11 | TP53 | ENST00000269305 | p.V143G                | c.428     | 11.92536866 | 8.894 | 2  |
| 11 | TP53 | ENST00000269305 | p.A161T                | c.481     | 10.49216698 | 8.471 | 3  |
| 11 | TP53 | ENST00000269305 | p.A161in_frame_del     | c.486_481 | 10.49216698 | 8.471 | 1  |
| 11 | TP53 | ENST00000269305 | p.Y163H                | c.487     | 27.20029547 | 7.808 | 1  |
| 11 | TP53 | ENST00000269305 | p.Y163N                | c.487     | 27.20029547 | 7.808 | 1  |
| 11 | TP53 | ENST00000269305 | p.Y162in_frame_delN    | c.487_485 | 5.862388683 | 7.729 | 1  |
| 11 | TP53 | ENST00000269305 | p.Y163C                | c.488     | 27.20029547 | 7.808 | 10 |
| 11 | TP53 | ENST00000269305 | p.K164E                | c.490     | 17.05551583 | 5.151 | 3  |
| 11 | TP53 | ENST00000269305 | p.H168L                | c.503     | 28.12904525 | 7.829 | 2  |
| 11 | TP53 | ENST00000269305 | p.H168P                | c.503     | 28.12904525 | 7.829 | 1  |
| 11 | TP53 | ENST00000269305 | p.H168R                | c.503     | 28.12904525 | 7.829 | 1  |
| 11 | TP53 | ENST00000269305 | p.V173L                | c.517     | 19.5856813  | 8.297 | 7  |
| 11 | TP53 | ENST00000269305 | p.V173M                | c.517     | 19.5856813  | 8.297 | 6  |
| 11 | TP53 | ENST00000269305 | p.V173G                | c.518     | 19.5856813  | 8.297 | 1  |
| 11 | TP53 | ENST00000269305 | p.R175C                | c.523     | 87.61688858 | 8.539 | 4  |
| 11 | TP53 | ENST00000269305 | p.R175G                | c.523     | 87.61688858 | 8.539 | 4  |
| 11 | TP53 | ENST00000269305 | p.R175H                | c.524     | 87.61688858 | 8.539 | 63 |
| 11 | TP53 | ENST00000269305 | p.C176F                | c.527     | 32.59544664 | 9.594 | 10 |
| 11 | TP53 | ENST00000269305 | p.C176S                | c.527     | 32.59544664 | 9.594 | 1  |
| 11 | TP53 | ENST00000269305 | p.C176Y                | c.527     | 32.59544664 | 9.594 | 9  |
| 11 | TP53 | ENST00000269305 | p.H179D                | c.535     | 42.12317148 | 9.337 | 1  |
| 11 | TP53 | ENST00000269305 | p.H179Y                | c.535     | 42.12317148 | 9.337 | 6  |
| 11 | TP53 | ENST00000269305 | p.H179L                | c.536     | 42.12317148 | 9.337 | 2  |
| 11 | TP53 | ENST00000269305 | p.H179P                | c.536     | 42.12317148 | 9.337 | 1  |
| 11 | TP53 | ENST00000269305 | p.H179R                | c.536     | 42.12317148 | 9.337 | 19 |
| 11 | TP53 | ENST00000269305 | p.H179Q                | c.537     | 42.12317148 | 9.337 | 2  |
| 11 | TP53 | ENST00000269305 | p.R181P                | c.542     | 14.97347547 | 7.662 | 1  |
| 11 | TP53 | ENST00000269305 | p.L194F                | c.580     | 25.86379943 | 7.946 | 1  |
| 11 | TP53 | ENST00000269305 | p.L194H                | c.581     | 25.86379943 | 7.946 | 1  |
| 11 | TP53 | ENST00000269305 | p.L194P                | c.581     | 25.86379943 | 7.946 | 2  |
| 11 | TP53 | ENST00000269305 | p.L194R                | c.581     | 25.86379943 | 7.946 | 6  |
| 11 | TP53 | ENST00000269305 | p.I195F                | c.583     | 29.40683052 | 8.227 | 1  |
| 11 | TP53 | ENST00000269305 | p.I195N                | c.584     | 29.40683052 | 8.227 | 3  |
| 11 | TP53 | ENST00000269305 | p.I195S                | c.584     | 29.40683052 | 8.227 | 2  |
| 11 | TP53 | ENST00000269305 | p.I195T                | c.584     | 29.40683052 | 8.227 | 14 |
| 11 | TP53 | ENST00000269305 | p.I195M                | c.585     | 29.40683052 | 8.227 | 1  |
| 11 | TP53 | ENST00000269305 | p.R196P                | c.587     | 26.65042544 | 8.911 | 2  |

|    |      |                 |                      |           |             |       |    |
|----|------|-----------------|----------------------|-----------|-------------|-------|----|
| 11 | TP53 | ENST00000269305 | p.Y234H              | c.700     | 27.75808273 | 7.599 | 1  |
| 11 | TP53 | ENST00000269305 | p.Y234N              | c.700     | 27.75808273 | 7.599 | 1  |
| 11 | TP53 | ENST00000269305 | p.Y234C              | c.701     | 27.75808273 | 7.599 | 10 |
| 11 | TP53 | ENST00000269305 | p.Y234S              | c.701     | 27.75808273 | 7.599 | 1  |
| 11 | TP53 | ENST00000269305 | p.Y236D              | c.706     | 26.53630716 | 4.729 | 1  |
| 11 | TP53 | ENST00000269305 | p.Y236C              | c.707     | 26.53630716 | 4.729 | 7  |
| 11 | TP53 | ENST00000269305 | p.M237V              | c.709     | 40.93035981 | 9.361 | 2  |
| 11 | TP53 | ENST00000269305 | p.M237K              | c.710     | 40.93035981 | 9.361 | 2  |
| 11 | TP53 | ENST00000269305 | p.M237I              | c.711     | 40.93035981 | 9.361 | 8  |
| 11 | TP53 | ENST00000269305 | p.C238S              | c.712     | 48.43219353 | 6.467 | 1  |
| 11 | TP53 | ENST00000269305 | p.C238F              | c.713     | 48.43219353 | 6.467 | 9  |
| 11 | TP53 | ENST00000269305 | p.C238Y              | c.713     | 48.43219353 | 6.467 | 8  |
| 11 | TP53 | ENST00000269305 | p.N239D              | c.715     | 18.7919751  | 5.874 | 1  |
| 11 | TP53 | ENST00000269305 | p.N239S              | c.716     | 18.7919751  | 5.874 | 4  |
| 11 | TP53 | ENST00000269305 | p.S240G              | c.718     | 27.59976191 | 2.866 | 2  |
| 11 | TP53 | ENST00000269305 | p.MCN237in_frame_del | c.718_710 | 40.93035981 | 9.361 | 1  |
| 11 | TP53 | ENST00000269305 | p.S241P              | c.721     | 21.03328261 | 4.99  | 1  |
| 11 | TP53 | ENST00000269305 | p.S241C              | c.722     | 21.03328261 | 4.99  | 3  |
| 11 | TP53 | ENST00000269305 | p.S241F              | c.722     | 21.03328261 | 4.99  | 9  |
| 11 | TP53 | ENST00000269305 | p.S241Y              | c.722     | 21.03328261 | 4.99  | 1  |
| 11 | TP53 | ENST00000269305 | p.NSS239in_frame_del | c.723_715 | 18.7919751  | 5.874 | 1  |
| 11 | TP53 | ENST00000269305 | p.M246R              | c.737     | 15.91818977 | 6.068 | 1  |
| 11 | TP53 | ENST00000269305 | p.M246I              | c.738     | 15.91818977 | 6.068 | 1  |
| 11 | TP53 | ENST00000269305 | p.R248G              | c.742     | 101.8821061 | 4.363 | 1  |
| 11 | TP53 | ENST00000269305 | p.R248W              | c.742_741 | 101.8821061 | 4.363 | 42 |
| 11 | TP53 | ENST00000269305 | p.R248L              | c.743     | 101.8821061 | 4.363 | 2  |
| 11 | TP53 | ENST00000269305 | p.R248P              | c.743     | 101.8821061 | 4.363 | 3  |
| 11 | TP53 | ENST00000269305 | p.R248Q              | c.743     | 101.8821061 | 4.363 | 46 |
| 11 | TP53 | ENST00000269305 | p.R249G              | c.745     | 30.65039501 | 8.464 | 6  |
| 11 | TP53 | ENST00000269305 | p.R249W              | c.745     | 30.65039501 | 8.464 | 2  |
| 11 | TP53 | ENST00000269305 | p.R249M              | c.746     | 30.65039501 | 8.464 | 5  |
| 11 | TP53 | ENST00000269305 | p.R249T              | c.746     | 30.65039501 | 8.464 | 1  |
| 11 | TP53 | ENST00000269305 | p.R249S              | c.747     | 30.65039501 | 8.464 | 6  |
| 11 | TP53 | ENST00000269305 | p.P250L              | c.750_749 | 16.0390717  | 5.888 | 7  |
| 11 | TP53 | ENST00000269305 | p.I251F              | c.751     | 17.47192205 | 4.644 | 1  |
| 11 | TP53 | ENST00000269305 | p.I251S              | c.752     | 17.47192205 | 4.644 | 1  |
| 11 | TP53 | ENST00000269305 | p.L252P              | c.755     | 7.928998617 | 8.429 | 1  |
| 11 | TP53 | ENST00000269305 | p.L252in_frame_del   | c.756_754 | 7.928998617 | 8.429 | 1  |
| 11 | TP53 | ENST00000269305 | p.LTI252in_frame_del | c.762_754 | 7.928998617 | 8.429 | 1  |
| 11 | TP53 | ENST00000269305 | p.F270I              | c.808     | 16.90879978 | 5.136 | 2  |
| 11 | TP53 | ENST00000269305 | p.F270L              | c.808     | 16.90879978 | 5.136 | 2  |
| 11 | TP53 | ENST00000269305 | p.F270C              | c.809     | 16.90879978 | 5.136 | 1  |
| 11 | TP53 | ENST00000269305 | p.F270S              | c.809     | 16.90879978 | 5.136 | 3  |
| 11 | TP53 | ENST00000269305 | p.E271K              | c.811     | 30.274455   | 3.559 | 6  |
| 11 | TP53 | ENST00000269305 | p.E271V              | c.812     | 30.274455   | 3.559 | 1  |
| 11 | TP53 | ENST00000269305 | p.V272M              | c.814     | 19.68404124 | 5.011 | 7  |
| 11 | TP53 | ENST00000269305 | p.V272G              | c.815     | 19.68404124 | 5.011 | 1  |
| 11 | TP53 | ENST00000269305 | p.R273C              | c.817     | 133.2808656 | 0     | 55 |
| 11 | TP53 | ENST00000269305 | p.R273S              | c.817     | 133.2808656 | 0     | 3  |

|    |       |                 |                         |           |             |       |    |
|----|-------|-----------------|-------------------------|-----------|-------------|-------|----|
| 11 | TP53  | ENST00000269305 | p.R273H                 | c.818     | 133.2808656 | 0     | 49 |
| 11 | TP53  | ENST00000269305 | p.R273L                 | c.818     | 133.2808656 | 0     | 9  |
| 11 | TP53  | ENST00000269305 | p.R273P                 | c.818     | 133.2808656 | 0     | 3  |
| 11 | TP53  | ENST00000269305 | p.V274F                 | c.820     | 24.72897031 | 4.647 | 2  |
| 11 | TP53  | ENST00000269305 | p.V274L                 | c.820     | 24.72897031 | 4.647 | 1  |
| 11 | TP53  | ENST00000269305 | p.V274D                 | c.821     | 24.72897031 | 4.647 | 1  |
| 11 | TP53  | ENST00000269305 | p.V274G                 | c.821     | 24.72897031 | 4.647 | 1  |
| 11 | TP53  | ENST00000269305 | p.C275F                 | c.824     | 25.29930843 | 3.886 | 4  |
| 11 | TP53  | ENST00000269305 | p.C275Y                 | c.824     | 25.29930843 | 3.886 | 5  |
| 11 | TP53  | ENST00000269305 | p.A276P                 | c.826     | 7.810869531 | 6.777 | 2  |
| 11 | TP53  | ENST00000269305 | p.C277F                 | c.830     | 6.522796351 | 7.21  | 4  |
| 11 | TP53  | ENST00000269305 | p.P278A                 | c.832     | 23.82425015 | 5.536 | 3  |
| 11 | TP53  | ENST00000269305 | p.P278S                 | c.832     | 23.82425015 | 5.536 | 4  |
| 11 | TP53  | ENST00000269305 | p.P278T                 | c.832     | 23.82425015 | 5.536 | 2  |
| 11 | TP53  | ENST00000269305 | p.P278H                 | c.833     | 23.82425015 | 5.536 | 2  |
| 11 | TP53  | ENST00000269305 | p.P278L                 | c.833     | 23.82425015 | 5.536 | 4  |
| 11 | TP53  | ENST00000269305 | p.P278R                 | c.833     | 23.82425015 | 5.536 | 3  |
| 11 | TP53  | ENST00000269305 | p.G279R                 | c.835     | 4.471111581 | 8.245 | 1  |
| 11 | TP53  | ENST00000269305 | p.G279E                 | c.836     | 4.471111581 | 8.245 | 2  |
| 11 | TP53  | ENST00000269305 | p.VCACPG274in_frame_del | c.836_819 | 24.72897031 | 4.647 | 1  |
| 11 | TP53  | ENST00000269305 | p.R280G                 | c.838     | 16.06173724 | 9.403 | 3  |
| 11 | TP53  | ENST00000269305 | p.R280I                 | c.839     | 16.06173724 | 9.403 | 3  |
| 11 | TP53  | ENST00000269305 | p.R280K                 | c.839     | 16.06173724 | 9.403 | 4  |
| 11 | TP53  | ENST00000269305 | p.R280T                 | c.839     | 16.06173724 | 9.403 | 4  |
| 11 | TP53  | ENST00000269305 | p.R280S                 | c.840     | 16.06173724 | 9.403 | 1  |
| 11 | TP53  | ENST00000269305 | p.D281H                 | c.841     | 14.6666203  | 6.654 | 1  |
| 11 | TP53  | ENST00000269305 | p.D281N                 | c.841     | 14.6666203  | 6.654 | 2  |
| 11 | TP53  | ENST00000269305 | p.D281Y                 | c.841     | 14.6666203  | 6.654 | 4  |
| 11 | TP53  | ENST00000269305 | p.D281A                 | c.842     | 14.6666203  | 6.654 | 1  |
| 11 | TP53  | ENST00000269305 | p.D281G                 | c.842     | 14.6666203  | 6.654 | 1  |
| 11 | TP53  | ENST00000269305 | p.D281V                 | c.842     | 14.6666203  | 6.654 | 2  |
| 11 | TP53  | ENST00000269305 | p.D281P                 | c.842_841 | 14.6666203  | 6.654 | 1  |
| 11 | TP53  | ENST00000269305 | p.D281E                 | c.843     | 14.6666203  | 6.654 | 1  |
| 11 | TP53  | ENST00000269305 | p.R282G                 | c.844     | 37.5582261  | 6.317 | 1  |
| 11 | TP53  | ENST00000269305 | p.R282W                 | c.844     | 37.5582261  | 6.317 | 27 |
| 11 | TP53  | ENST00000269305 | p.R282Q                 | c.845     | 37.5582261  | 6.317 | 1  |
| 11 | TP53  | ENST00000269305 | p.R283P                 | c.848     | 5.080017638 | 8.935 | 3  |
| 11 | TP53  | ENST00000269305 | p.T284P                 | c.850     | 0.498748218 | 8.979 | 1  |
| 11 | TP53  | ENST00000269305 | p.E285K                 | c.853     | 21.63403254 | 4.973 | 7  |
| 11 | TP53  | ENST00000269305 | p.E286K                 | c.856     | 18.25668213 | 7.448 | 6  |
| 11 | TP53  | ENST00000269305 | p.E286Q                 | c.856     | 18.25668213 | 7.448 | 1  |
| 11 | TP53  | ENST00000269305 | p.E286A                 | c.857     | 18.25668213 | 7.448 | 1  |
| 11 | TP53  | ENST00000269305 | p.E286G                 | c.857     | 18.25668213 | 7.448 | 3  |
| 11 | TP53  | ENST00000269305 | p.E286V                 | c.857     | 18.25668213 | 7.448 | 1  |
| 12 | ITGB1 | ENST00000374956 | p.M149L                 | c.445     | 2.036284225 | 0     | 1  |
| 12 | ITGB1 | ENST00000374956 | p.M149V                 | c.445     | 2.036284225 | 0     | 1  |
| 12 | ITGB1 | ENST00000374956 | p.M149I                 | c.447     | 2.036284225 | 0     | 1  |
| 12 | ITGB1 | ENST00000374956 | p.V162G                 | c.485     | 0.085595029 | 9.665 | 1  |
| 12 | ITGB1 | ENST00000374956 | p.V236A                 | c.707     | 0.142463166 | 6.055 | 1  |

|    |        |                 |         |        |             |       |   |
|----|--------|-----------------|---------|--------|-------------|-------|---|
| 12 | ITGB1  | ENST00000374956 | p.F276L | c.826  | 0.065024735 | 5.643 | 1 |
| 13 | AGT    | ENST00000366667 | p.N426S | c.1277 | 0.117305393 | 3.16  | 1 |
| 13 | AGT    | ENST00000366667 | p.S427N | c.1280 | 0.009957496 | 6.803 | 1 |
| 13 | AGT    | ENST00000366667 | p.A138T | c.412  | 0.130523779 | 0     | 1 |
| 13 | AGT    | ENST00000366667 | p.V187L | c.559  | 0.117439722 | 7.552 | 1 |
| 13 | AGT    | ENST00000366667 | p.V209A | c.626  | 0.115144673 | 7.841 | 1 |
| 14 | AOC1   | ENST00000416793 | p.P552S | c.1654 | 0.06858235  | 5.307 | 1 |
| 14 | AOC1   | ENST00000416793 | p.L605M | c.1813 | 1.025260027 | 0     | 2 |
| 15 | CALM1  | ENST00000447653 | p.E84K  | c.250  | 0.522528728 | 6.258 | 1 |
| 15 | CALM2  | ENST00000409563 | p.S86Y  | c.257  | 0.219026292 | 5.393 | 1 |
| 15 | CALM1  | ENST00000447653 | p.R108C | c.322  | 1.108838033 | 0     | 1 |
| 15 | CALM1  | ENST00000447653 | p.R108H | c.323  | 1.108838033 | 0     | 1 |
| 15 | CALM2  | ENST00000409563 | p.R134T | c.401  | 0.612137286 | 5.961 | 1 |
| 15 | CALM2  | ENST00000409563 | p.R138C | c.412  | 0.396021139 | 7.029 | 1 |
| 15 | CALM2  | ENST00000409563 | p.R154C | c.460  | 0.110966455 | 8.876 | 1 |
| 15 | CALM2  | ENST00000409563 | p.Y186C | c.557  | 0.967408789 | 4.438 | 1 |
| 16 | CYP3A4 | ENST00000336411 | p.A370V | c.1109 | 0.020416278 | 9.218 | 1 |
| 16 | CYP3A4 | ENST00000336411 | p.D425E | c.1275 | 0.027012819 | 9.933 | 1 |
| 16 | CYP3A4 | ENST00000336411 | p.N426S | c.1277 | 0.28336829  | 6.509 | 1 |
| 16 | CYP3A4 | ENST00000336411 | p.R440K | c.1319 | 0.437455845 | 0     | 1 |
| 16 | CYP3A4 | ENST00000336411 | p.K476E | c.1426 | 0.231348982 | 2.59  | 1 |
| 16 | CYP3A4 | ENST00000336411 | p.S119F | c.356  | 0.299618595 | 3.77  | 1 |
| 16 | CYP3A4 | ENST00000336411 | p.E122K | c.364  | 0.22422792  | 3.758 | 1 |
| 16 | CYP3A4 | ENST00000336411 | p.E125K | c.373  | 0.045770436 | 5.845 | 1 |
| 16 | CYP3A4 | ENST00000336411 | p.R130Q | c.389  | 0.097728201 | 3.876 | 1 |
| 16 | CYP3A4 | ENST00000336411 | p.R212I | c.635  | 0.025023052 | 9.991 | 1 |
| 16 | CYP3A4 | ENST00000336411 | p.A297T | c.889  | 0.094638902 | 6.399 | 1 |
| 16 | CYP3A4 | ENST00000336411 | p.Y319C | c.956  | 0.033972448 | 6.365 | 1 |
| 17 | RPS27A | ENST00000272317 | p.A46V  | c.137  | 0.013574097 | 6.203 | 1 |
| 17 | RPS27A | ENST00000272317 | p.L67V  | c.199  | 0.016170986 | 0     | 1 |
| 17 | RPS27A | ENST00000272317 | p.G10E  | c.29   | 0.002596889 | 8.589 | 1 |
| 18 | TRIP10 | ENST00000313244 | p.P497L | c.1490 | 0.019464647 | 0     | 1 |
| 18 | TRIP10 | ENST00000313244 | p.E535K | c.1603 | 0.019464647 | 5.683 | 1 |
| 19 | MYH7   | ENST00000355349 | p.R143W | c.427  | 0.063849836 | 4     | 1 |
| 19 | MYH7   | ENST00000355349 | p.G144S | c.430  | 0.03513855  | 5.533 | 1 |
| 19 | MYH7   | ENST00000355349 | p.E217K | c.649  | 0.084097378 | 0     | 1 |
| 20 | TFRC   | ENST00000360110 | p.S338C | c.1013 | 0.106117462 | 3.25  | 1 |
| 20 | TFRC   | ENST00000360110 | p.Y211S | c.632  | 0.010570538 | 6.708 | 1 |
| 20 | TFRC   | ENST00000360110 | p.E294K | c.880  | 0.11467718  | 0     | 1 |
| 21 | CES1   | ENST00000360526 | p.Y84C  | c.251  | 0.187351547 | 6.358 | 1 |
| 21 | CES1   | ENST00000360526 | p.P86L  | c.257  | 0.21415535  | 5.818 | 1 |
| 21 | CES1   | ENST00000360526 | p.C88F  | c.263  | 0.263163191 | 5.635 | 1 |
| 21 | CES1   | ENST00000360526 | p.L98I  | c.292  | 0.080913895 | 5.618 | 1 |
| 21 | CES1   | ENST00000360526 | p.R105Q | c.314  | 0.212305674 | 5.45  | 1 |
| 21 | CES1   | ENST00000360526 | p.D116N | c.346  | 0.248141276 | 8.866 | 1 |
| 21 | CES1   | ENST00000360526 | p.A149V | c.446  | 1.096798837 | 0     | 2 |
| 21 | CES1   | ENST00000360526 | p.R172C | c.514  | 0.280029385 | 9.504 | 1 |
| 22 | CBFB   | ENST00000412916 | p.P70S  | c.208  | 0.006301889 | 0     | 1 |
| 22 | CBFB   | ENST00000412916 | p.A99V  | c.296  | 0.006301889 | 7.31  | 1 |

|              |                 |         |        |             |       |   |
|--------------|-----------------|---------|--------|-------------|-------|---|
| 23 EIF2B1    | ENST00000424014 | p.A129T | c.385  | 0.006504184 | 0     | 1 |
| 23 EIF2B1    | ENST00000424014 | p.V178L | c.532  | 0.004274585 | 7.87  | 1 |
| 23 EIF2B1    | ENST00000424014 | p.A181T | c.541  | 0.002229599 | 8.809 | 1 |
| 24 SERPINA12 | ENST00000556881 | p.F139L | c.417  | 0.088356034 | 5.547 | 1 |
| 24 SERPINA12 | ENST00000556881 | p.E161K | c.481  | 0.168144651 | 0     | 1 |
| 24 SERPINA12 | ENST00000556881 | p.K184N | c.552  | 0.148499724 | 2.782 | 1 |
| 24 SERPINA12 | ENST00000556881 | p.V201A | c.602  | 0.065223341 | 9.516 | 1 |
| 25 CDK7      | ENST00000256443 | p.K41N  | c.123  | 0.027288391 | 0     | 1 |
| 25 CDK7      | ENST00000256443 | p.A159T | c.475  | 0.008590751 | 6.863 | 1 |
| 25 CDK7      | ENST00000256443 | p.S161Y | c.482  | 0.022587678 | 5.741 | 1 |
| 26 ITGB3     | ENST00000559488 | p.E664K | c.1990 | 0.069444296 | 3.848 | 1 |
| 26 ITGB3     | ENST00000559488 | p.K702T | c.2105 | 0.069444296 | 0     | 1 |
| 27 CYP1A1    | ENST00000567032 | p.R477W | c.1429 | 0.062698389 | 7.403 | 1 |
| 27 CYP1A1    | ENST00000567032 | p.E479K | c.1435 | 0.223106233 | 0     | 1 |
| 27 CYP1A1    | ENST00000567032 | p.V482M | c.1444 | 0.061006749 | 7.993 | 1 |
| 27 CYP1A1    | ENST00000567032 | p.Q507K | c.1519 | 0.139834016 | 3.747 | 1 |
| 27 CYP1A1    | ENST00000567032 | p.Q509L | c.1526 | 0.198063535 | 2.849 | 1 |
| 28 SH2D1A    | ENST00000371139 | p.M1V   | c.1    | 0.210616574 | 4.238 | 1 |
| 28 SH2D1A    | ENST00000371139 | p.Y7H   | c.19   | 0.23858751  | 2.784 | 1 |
| 28 SH2D1A    | ENST00000371139 | p.W64C  | c.192  | 0.133570453 | 7.24  | 1 |
| 28 SH2D1A    | ENST00000371139 | p.H8Y   | c.22   | 0.623152796 | 1.636 | 1 |
| 28 SH2D1A    | ENST00000371139 | p.V102I | c.304  | 0.346770793 | 3.9   | 1 |
| 28 SH2D1A    | ENST00000371139 | p.K104N | c.312  | 0.678437333 | 0     | 1 |
| 28 SH2D1A    | ENST00000371139 | p.L25M  | c.73   | 0.170428109 | 3.558 | 1 |
| 29 TRAF6     | ENST00000348124 | p.L409F | c.1225 | 0.01823401  | 5.861 | 1 |
| 29 TRAF6     | ENST00000348124 | p.L435I | c.1303 | 0.060816683 | 4.064 | 1 |
| 29 TRAF6     | ENST00000348124 | p.R496C | c.1486 | 0.076993347 | 0     | 1 |
| 30 EPB41     | ENST00000373798 | p.D46H  | c.136  | 0.096939953 | 3.407 | 1 |
| 30 EPB41     | ENST00000373798 | p.N47T  | c.140  | 0.030947651 | 5.144 | 1 |
| 30 EPB41     | ENST00000373798 | p.E75Q  | c.223  | 0.122555207 | 0     | 1 |
| 31 DUSP22    | ENST00000419235 | p.P59S  | c.175  | 0.140560429 | 0     | 1 |
| 31 DUSP22    | ENST00000419235 | p.V129M | c.385  | 0.049199756 | 4.477 | 1 |
| 31 DUSP22    | ENST00000419235 | p.G130D | c.389  | 0.099951424 | 3.386 | 1 |
| 32 FAP       | ENST00000188790 | p.T404I | c.1211 | 0.057837058 | 4.148 | 1 |
| 32 FAP       | ENST00000188790 | p.S407L | c.1220 | 0.018607046 | 6.928 | 1 |
| 32 FAP       | ENST00000188790 | p.A459T | c.1375 | 0.089983883 | 0     | 1 |
| 32 FAP       | ENST00000188790 | p.R480H | c.1439 | 0.03719082  | 5.301 | 1 |
| 33 SELP      | ENST00000263686 | p.T102I | c.305  | 0.007149212 | 7.128 | 1 |
| 33 SELP      | ENST00000263686 | p.D130N | c.388  | 0.007149212 | 0     | 1 |
| 34 GGH       | ENST00000260118 | p.A58V  | c.173  | 0.005451995 | 7.519 | 1 |
| 34 GGH       | ENST00000260118 | p.E65Q  | c.193  | 0.083215726 | 3.587 | 1 |
| 34 GGH       | ENST00000260118 | p.V74I  | c.220  | 0.018425166 | 7.485 | 1 |
| 34 GGH       | ENST00000260118 | p.I297M | c.891  | 0.094249729 | 0     | 1 |
| 35 ADAT2     | ENST00000237283 | p.A14V  | c.41   | 0.01132771  | 0     | 1 |
| 35 ADAT2     | ENST00000237283 | p.A143V | c.428  | 0.01132771  | 6.464 | 1 |
| 36 ACE       | ENST00000290866 | p.R508Q | c.1523 | 2.015646676 | 0     | 3 |
| 36 ACE       | ENST00000290866 | p.W628C | c.1884 | 0.046940028 | 5.998 | 1 |
| 37 MEPCE     | ENST00000310512 | p.E645Q | c.1933 | 0.001604122 | 0     | 1 |
| 37 MEPCE     | ENST00000310512 | p.P677H | c.2030 | 0.001604122 | 9.284 | 1 |



|             |                 |                     |           |             |       |   |
|-------------|-----------------|---------------------|-----------|-------------|-------|---|
| 38 VHL      | ENST00000256474 | p.S65L              | c.194     | 5.516677126 | 2.215 | 2 |
| 38 VHL      | ENST00000256474 | p.S65W              | c.194     | 5.516677126 | 2.215 | 1 |
| 38 VHL      | ENST00000256474 | p.P86L              | c.257     | 0.42181287  | 8.59  | 1 |
| 38 VHL      | ENST00000256474 | p.W88R              | c.262     | 3.74191187  | 4.943 | 1 |
| 38 VHL      | ENST00000256474 | p.W88L              | c.263     | 3.74191187  | 4.943 | 2 |
| 38 VHL      | ENST00000256474 | p.L89H              | c.266     | 9.255959724 | 0     | 7 |
| 38 VHL      | ENST00000256474 | p.L89P              | c.266     | 9.255959724 | 0     | 2 |
| 38 VHL      | ENST00000256474 | p.N90I              | c.269     | 0.748717032 | 5.331 | 1 |
| 38 VHL      | ENST00000256474 | p.G93V              | c.278     | 0.163533077 | 7.516 | 1 |
| 38 VHL      | ENST00000256474 | p.S111N             | c.332     | 6.557684786 | 8.4   | 5 |
| 38 VHL      | ENST00000256474 | p.S111R             | c.333     | 6.557684786 | 8.4   | 2 |
| 38 VHL      | ENST00000256474 | p.Y112D             | c.334     | 0.197577875 | 8.885 | 1 |
| 38 VHL      | ENST00000256474 | p.G114R             | c.340     | 3.61363956  | 5.74  | 2 |
| 38 VHL      | ENST00000256474 | p.G114R             | c.340     | 3.61363956  | 5.74  | 2 |
| 38 VHL      | ENST00000256474 | p.H115N             | c.343     | 3.260166059 | 5.469 | 2 |
| 38 VHL      | ENST00000256474 | p.H115Y             | c.343     | 3.260166059 | 5.469 | 1 |
| 38 VHL      | ENST00000256474 | p.L116in_frame_del  | c.346_348 | 2.302171553 | 2.759 | 1 |
| 38 VHL      | ENST00000256474 | p.W117C             | c.351     | 0.968460014 | 4.792 | 1 |
| 38 VHL      | ENST00000256474 | p.L135F             | c.405     | 1.641428999 | 4.024 | 2 |
| 38 VHL      | ENST00000256474 | p.F136V             | c.406     | 2.017421545 | 8.774 | 1 |
| 38 VHL      | ENST00000256474 | p.F136Y             | c.407     | 2.017421545 | 8.774 | 1 |
| 38 VHL      | ENST00000256474 | p.R205C             | c.613     | 0.096858109 | 8.571 | 1 |
| 39 TNFRSF21 | ENST00000296861 | p.I599M             | c.1797    | 0.164595865 | 0     | 1 |
| 39 TNFRSF21 | ENST00000296861 | p.V647A             | c.1940    | 0.164595865 | 2.603 | 1 |
| 40 TBX3     | ENST00000257566 | p.H187Y             | c.559     | 1.01060582  | 0     | 2 |
| 40 TBX3     | ENST00000257566 | p.G232R             | c.694     | 0.05706499  | 6.559 | 1 |
| 41 ME1      | ENST00000369705 | p.L391I             | c.1171    | 0.163187405 | 3.706 | 1 |
| 41 ME1      | ENST00000369705 | p.R400Q             | c.1199    | 0.147757998 | 7.532 | 1 |
| 41 ME1      | ENST00000369705 | p.P401H             | c.1202    | 0.195687185 | 4.389 | 1 |
| 41 ME1      | ENST00000369705 | p.T424I             | c.1271    | 1.13288595  | 0     | 1 |
| 41 ME1      | ENST00000369705 | p.T424S             | c.1271    | 1.13288595  | 0     | 1 |
| 41 ME1      | ENST00000369705 | p.R427H             | c.1280    | 0.190271065 | 8.321 | 1 |
| 42 VAT1L    | ENST00000302536 | p.K267N             | c.801     | 0.030357047 | 6.848 | 1 |
| 42 VAT1L    | ENST00000302536 | p.Y272N             | c.814     | 0.269853468 | 2.896 | 1 |
| 42 VAT1L    | ENST00000302536 | p.A314T             | c.940     | 1.143024184 | 0     | 1 |
| 42 VAT1L    | ENST00000302536 | p.A314E             | c.941     | 1.143024184 | 0     | 1 |
| 43 CRP      | ENST00000343919 | p.S39F              | c.116     | 0.100595085 | 8.776 | 1 |
| 43 CRP      | ENST00000343919 | p.G92C              | c.274     | 1.20559359  | 4.199 | 1 |
| 43 CRP      | ENST00000343919 | p.G92S              | c.274     | 1.20559359  | 4.199 | 1 |
| 43 CRP      | ENST00000343919 | p.QG91in_frame_delR | c.274_272 | 0.336088521 | 3.35  | 1 |
| 43 CRP      | ENST00000343919 | p.F29L              | c.85      | 0.356421557 | 6.81  | 1 |
| 43 CRP      | ENST00000343919 | p.P30S              | c.88      | 1.406082028 | 0     | 1 |
| 43 CRP      | ENST00000343919 | p.P30L              | c.89      | 1.406082028 | 0     | 1 |
| 44 PLG      | ENST00000308192 | p.K104M             | c.311     | 0.414093539 | 5.719 | 1 |
| 44 PLG      | ENST00000308192 | p.D158N             | c.472     | 1.025939843 | 0     | 2 |
| 44 PLG      | ENST00000308192 | p.P159S             | c.475     | 0.106210951 | 9.359 | 1 |
| 44 PLG      | ENST00000308192 | p.G161K             | c.481_482 | 0.108869361 | 9.321 | 1 |
| 44 PLG      | ENST00000308192 | p.E182D             | c.546     | 0.246625698 | 8.014 | 1 |
| 45 HMBS     | ENST00000537841 | p.S58R              | c.172     | 0.015239929 | 6.036 | 1 |

|    |        |                 |                    |             |             |       |   |
|----|--------|-----------------|--------------------|-------------|-------------|-------|---|
| 45 | HMBS   | ENST00000537841 | p.A105T            | c.313       | 0.05066032  | 4.303 | 1 |
| 45 | HMBS   | ENST00000537841 | p.I188S            | c.563       | 0.065900249 | 0     | 1 |
| 46 | CFTR   | ENST00000003084 | p.E403K            | c.1206_1207 | 0.031091957 | 6.653 | 1 |
| 46 | CFTR   | ENST00000003084 | p.G542R            | c.1624      | 0.028471964 | 7.002 | 1 |
| 46 | CFTR   | ENST00000003084 | p.G576R            | c.1726      | 0.191533794 | 8.936 | 1 |
| 46 | CFTR   | ENST00000003084 | p.E583K            | c.1747      | 1.071041119 | 0     | 2 |
| 46 | CFTR   | ENST00000003084 | p.D651N            | c.1951      | 0.090738921 | 6.208 | 1 |
| 46 | CFTR   | ENST00000003084 | p.R658K            | c.1973      | 0.145850263 | 4.728 | 1 |
| 47 | DDX41  | ENST00000330503 | p.E458G            | c.1373      | 0.083153894 | 7.278 | 1 |
| 47 | DDX41  | ENST00000330503 | p.H481Y            | c.1441      | 1.006443231 | 0     | 2 |
| 48 | VIL1   | ENST00000248444 | p.F660in_frame_del | c.1973_1975 | 0.028281452 | 5.144 | 1 |
| 48 | VIL1   | ENST00000248444 | p.K699N            | c.2097      | 0.028281452 | 0     | 1 |
| 49 | DUPD1  | ENST00000338487 | p.M168T            | c.503       | 0.032173128 | 0     | 1 |
| 49 | DUPD1  | ENST00000338487 | p.L200Q            | c.599       | 0.032173128 | 4.958 | 1 |
| 50 | RGS8   | ENST00000258302 | p.C107S            | c.320       | 0.007763915 | 0     | 1 |
| 50 | RGS8   | ENST00000258302 | p.G166E            | c.497       | 0.007763915 | 7.009 | 1 |
| 51 | AXL    | ENST00000301178 | p.R48W             | c.142       | 1           | 0     | 2 |
| 52 | RPL11  | ENST00000374550 | p.F107V            | c.319       | 0.016086564 | 5.958 | 1 |
| 52 | RPL11  | ENST00000374550 | p.R16C             | c.46        | 0.002915087 | 9.74  | 1 |
| 52 | RPL11  | ENST00000374550 | p.F166L            | c.496       | 0.017255977 | 0     | 1 |
| 53 | CUL4B  | ENST00000404115 | p.D348H            | c.1042      | 0.109815573 | 9.343 | 1 |
| 53 | CUL4B  | ENST00000404115 | p.R369Q            | c.1106      | 1.113513223 | 0     | 2 |
| 53 | CUL4B  | ENST00000404115 | p.K403T            | c.1208      | 0.052315792 | 7.994 | 1 |
| 53 | CUL4B  | ENST00000404115 | p.Y431S            | c.1292      | 0.222630734 | 3.503 | 1 |
| 53 | CUL4B  | ENST00000404115 | p.H296Y            | c.886       | 0.154637554 | 5.655 | 1 |
| 54 | CAMK1D | ENST00000378847 | p.R126C            | c.376       | 0.008092806 | 7.739 | 1 |
| 54 | CAMK1D | ENST00000378847 | p.V128D            | c.383       | 0.084252417 | 5.754 | 1 |
| 54 | CAMK1D | ENST00000378847 | p.A131V            | c.392       | 0.020997087 | 6.543 | 1 |
| 54 | CAMK1D | ENST00000378847 | p.V132M            | c.394       | 0.09351352  | 3.619 | 1 |
| 54 | CAMK1D | ENST00000378847 | p.L150I            | c.448       | 0.065271862 | 9.971 | 1 |
| 54 | CAMK1D | ENST00000378847 | p.S206F            | c.617       | 0.041110072 | 8.919 | 1 |
| 54 | CAMK1D | ENST00000378847 | p.C270Y            | c.809       | 0.118387479 | 0     | 1 |
| 55 | ADH1A  | ENST00000209668 | p.V42M             | c.124       | 0.153463364 | 0     | 1 |
| 55 | ADH1A  | ENST00000209668 | p.G45E             | c.134       | 0.084944408 | 8.215 | 1 |
| 55 | ADH1A  | ENST00000209668 | p.H68Y             | c.202       | 0.138771363 | 4.272 | 1 |
| 55 | ADH1A  | ENST00000209668 | p.S165L            | c.494       | 0.01717555  | 6.863 | 1 |
| 55 | ADH1A  | ENST00000209668 | p.P166T            | c.496       | 0.103721272 | 3.478 | 1 |
| 56 | MAT1A  | ENST00000372213 | p.L160F            | c.478       | 0.024416496 | 5.356 | 1 |
| 56 | MAT1A  | ENST00000372213 | p.V204I            | c.610       | 0.04625473  | 0     | 1 |
| 56 | MAT1A  | ENST00000372213 | p.V241I            | c.721       | 0.021838234 | 5.517 | 1 |
| 57 | FGD5   | ENST00000285046 | p.N1090D           | c.3268      | 0.012056876 | 0     | 1 |
| 57 | FGD5   | ENST00000285046 | p.G1111V           | c.3332      | 0.012056876 | 6.374 | 1 |
| 58 | PECR   | ENST00000265322 | p.P160S            | c.478       | 0.006953717 | 7.168 | 1 |
| 58 | PECR   | ENST00000265322 | p.I196M            | c.588       | 0.0078125   | 7     | 1 |
| 58 | PECR   | ENST00000265322 | p.L267F            | c.799       | 0.014766217 | 0     | 1 |
| 59 | LEPR   | ENST00000349533 | p.I434S            | c.1301      | 0.069629706 | 3.934 | 1 |
| 59 | LEPR   | ENST00000349533 | p.L464M            | c.1390      | 0.101945826 | 0     | 1 |
| 59 | LEPR   | ENST00000349533 | p.S483Y            | c.1448      | 0.039360301 | 9.546 | 1 |
| 59 | LEPR   | ENST00000349533 | p.R514S            | c.1542      | 0.077409093 | 4.829 | 1 |

|    |         |                 |                   |           |             |       |   |
|----|---------|-----------------|-------------------|-----------|-------------|-------|---|
| 60 | ACTN2   | ENST00000542672 | p.S431L           | c.1292    | 0.101319194 | 0     | 1 |
| 60 | ACTN2   | ENST00000542672 | p.A432V           | c.1295    | 0.028182254 | 9.638 | 1 |
| 60 | ACTN2   | ENST00000542672 | p.N590D           | c.1768    | 0.057824129 | 4.892 | 1 |
| 60 | ACTN2   | ENST00000542672 | p.R592I           | c.1775    | 0.087526896 | 3.913 | 1 |
| 61 | ERBB4   | ENST00000342788 | p.P594T           | c.1780    | 0.088378196 | 3.993 | 1 |
| 61 | ERBB4   | ENST00000342788 | p.Y268C           | c.803     | 0.318637894 | 0     | 1 |
| 61 | ERBB4   | ENST00000342788 | p.S303F           | c.908     | 0.111929578 | 3.455 | 1 |
| 61 | ERBB4   | ENST00000342788 | p.C304F           | c.911     | 0.175928421 | 2.731 | 1 |
| 61 | ERBB4   | ENST00000342788 | p.R306C           | c.916     | 0.017414644 | 6.156 | 1 |
| 62 | OPRK1   | ENST00000265572 | p.C345R           | c.1033    | 0.028879537 | 8.693 | 1 |
| 62 | OPRK1   | ENST00000265572 | p.R354L           | c.1061    | 0.652094149 | 5.394 | 1 |
| 62 | OPRK1   | ENST00000265572 | p.R361Q           | c.1082    | 1.18154224  | 0     | 2 |
| 62 | OPRK1   | ENST00000265572 | p.D366N           | c.1096    | 0.08362318  | 8.605 | 1 |
| 62 | OPRK1   | ENST00000265572 | p.I84T            | c.251     | 0.069721193 | 9.92  | 1 |
| 62 | OPRK1   | ENST00000265572 | p.R86Q            | c.257     | 0.232412743 | 3.315 | 1 |
| 62 | OPRK1   | ENST00000265572 | p.M90I            | c.270     | 0.681045212 | 4.325 | 1 |
| 62 | OPRK1   | ENST00000265572 | p.N95T            | c.284     | 0.091630958 | 9.513 | 1 |
| 63 | DUSP22  | ENST00000419235 | p.D39N            | c.115     | 1.105720836 | 0     | 2 |
| 63 | DUSP22  | ENST00000419235 | p.A56V            | c.167     | 1.089574865 | 7.169 | 2 |
| 63 | DUSP22  | ENST00000419235 | p.R94M            | c.281     | 0.335000215 | 3.445 | 1 |
| 64 | MME     | ENST00000360490 | p.N514I           | c.1541    | 0.094724455 | 3.821 | 1 |
| 64 | MME     | ENST00000360490 | p.P162A           | c.484     | 0.194171346 | 2.692 | 1 |
| 64 | MME     | ENST00000360490 | p.E185K           | c.553     | 0.163115596 | 8.325 | 1 |
| 64 | MME     | ENST00000360490 | p.S193Y           | c.578     | 0.412619117 | 0     | 1 |
| 64 | MME     | ENST00000360490 | p.E329K           | c.985     | 0.13642752  | 4.332 | 1 |
| 64 | MME     | ENST00000360490 | p.T333I           | c.998     | 0.171309257 | 2.896 | 1 |
| 65 | MLYCD   | ENST00000262430 | p.L406M           | c.1216    | 0.003280201 | 8.252 | 1 |
| 65 | MLYCD   | ENST00000262430 | p.Q479R           | c.1436    | 0.003280201 | 0     | 1 |
| 66 | PTPRN2  | ENST00000404321 | p.V863M           | c.2587    | 0.024247439 | 0     | 1 |
| 66 | PTPRN2  | ENST00000404321 | p.R911K           | c.2732    | 0.006447699 | 7.277 | 1 |
| 66 | PTPRN2  | ENST00000404321 | p.Y957H           | c.2869    | 0.01779974  | 5.812 | 1 |
| 67 | MAD2L1  | ENST00000296509 | p.Y77F            | c.230     | 0.032509383 | 4.943 | 1 |
| 67 | MAD2L1  | ENST00000296509 | p.G15R            | c.43      | 0.032509383 | 0     | 1 |
| 68 | DDX53   | ENST00000327968 | p.M426I           | c.1278    | 0.047497652 | 4.396 | 1 |
| 68 | DDX53   | ENST00000327968 | p.L208F           | c.624     | 0.047497652 | 0     | 1 |
| 69 | PIP4K2A | ENST00000376573 | p.R349G           | c.1045    | 0.021157118 | 5.901 | 1 |
| 69 | PIP4K2A | ENST00000376573 | p.E351D           | c.1053    | 0.0444037   | 4.68  | 1 |
| 69 | PIP4K2A | ENST00000376573 | p.Y353F           | c.1058    | 0.053076241 | 4.291 | 1 |
| 69 | PIP4K2A | ENST00000376573 | p.K244T           | c.731     | 0.106828644 | 0     | 1 |
| 70 | GIMAP7  | ENST00000313543 | p.V157I           | c.469     | 0.025676152 | 7.969 | 1 |
| 70 | GIMAP7  | ENST00000313543 | p.E32K            | c.94      | 1.003991094 | 0     | 2 |
| 71 | CNOT1   | ENST00000317147 | p.A1396T          | c.4186    | 0.010806177 | 6.532 | 1 |
| 71 | CNOT1   | ENST00000317147 | p.N1471H          | c.4411    | 0.010806177 | 0     | 1 |
| 72 | ALPP    | ENST00000392027 | p.A183V           | c.548     | 0.109727725 | 0     | 1 |
| 72 | ALPP    | ENST00000392027 | p.Q211K           | c.631     | 0.109727725 | 3.188 | 1 |
| 73 | GNPDA1  | ENST00000311337 | p.L39H            | c.116     | 0.080380982 | 0     | 1 |
| 73 | GNPDA1  | ENST00000311337 | p.K67N            | c.201     | 0.020252896 | 6.831 | 1 |
| 73 | GNPDA1  | ENST00000311337 | p.F94in_frame_del | c.282_280 | 0.060484791 | 4.224 | 1 |
| 73 | GNPDA1  | ENST00000311337 | p.G136A           | c.407     | 0.018085785 | 5.789 | 1 |

|    |         |                 |                    |           |             |       |   |
|----|---------|-----------------|--------------------|-----------|-------------|-------|---|
| 74 | CD300A  | ENST00000360141 | p.D115N            | c.343     | 0.009813612 | 0     | 1 |
| 74 | CD300A  | ENST00000360141 | p.R22K             | c.65      | 0.009813612 | 6.671 | 1 |
| 75 | MGAM    | ENST00000475668 | p.D422G            | c.1265    | 0.068794651 | 4.315 | 1 |
| 75 | MGAM    | ENST00000475668 | p.P453S            | c.1357    | 0.220162923 | 0     | 1 |
| 75 | MGAM    | ENST00000475668 | p.P499S            | c.1495    | 0.174055056 | 2.746 | 1 |
| 75 | MGAM    | ENST00000475668 | p.S534F            | c.1601    | 0.053318764 | 5.705 | 1 |
| 75 | MGAM    | ENST00000475668 | p.L568V            | c.1702    | 0.054880379 | 9.21  | 1 |
| 76 | CHKA    | ENST00000265689 | p.M183T            | c.548     | 0.02295576  | 0     | 1 |
| 76 | CHKA    | ENST00000265689 | p.F235L            | c.705     | 0.02295576  | 5.445 | 1 |
| 77 | PRSS1   | ENST00000486171 | p.Y37C             | c.110     | 0.206498252 | 9.713 | 1 |
| 77 | PRSS1   | ENST00000486171 | p.H46L             | c.137     | 0.168213404 | 7.612 | 1 |
| 77 | PRSS1   | ENST00000486171 | p.E93D             | c.279     | 0.39716363  | 8.77  | 1 |
| 77 | PRSS1   | ENST00000486171 | p.R136L            | c.407     | 0.327772607 | 8.73  | 1 |
| 77 | PRSS1   | ENST00000486171 | p.T149N            | c.446     | 0.185248804 | 9.218 | 1 |
| 77 | PRSS1   | ENST00000486171 | p.N160Y            | c.478     | 0.308901268 | 8.271 | 1 |
| 77 | PRSS1   | ENST00000486171 | p.A162T            | c.484     | 1.197404713 | 0     | 1 |
| 77 | PRSS1   | ENST00000486171 | p.A162E            | c.485     | 1.197404713 | 0     | 1 |
| 77 | PRSS1   | ENST00000486171 | p.A177T            | c.529     | 0.728745772 | 8.45  | 1 |
| 77 | PRSS1   | ENST00000486171 | p.P178S            | c.532     | 0.754880592 | 8.919 | 1 |
| 77 | PRSS1   | ENST00000486171 | p.K207M            | c.620     | 0.368035698 | 7.118 | 1 |
| 77 | PRSS1   | ENST00000486171 | p.S209L            | c.626     | 0.309746186 | 5.39  | 1 |
| 77 | PRSS1   | ENST00000486171 | p.G212D            | c.635     | 0.383200034 | 4.106 | 1 |
| 77 | PRSS1   | ENST00000486171 | p.D22N             | c.64      | 0.395171137 | 3.965 | 1 |
| 77 | PRSS1   | ENST00000486171 | p.K237in_frame_del | c.707_709 | 0.225483813 | 9.359 | 1 |
| 77 | PRSS1   | ENST00000486171 | p.V25A             | c.74      | 0.525185527 | 8.819 | 1 |
| 77 | PRSS1   | ENST00000486171 | p.C30Y             | c.89      | 0.623021853 | 5.664 | 1 |
| 78 | NAALAD2 | ENST00000534061 | p.H367N            | c.1099    | 0.255620656 | 5.914 | 1 |
| 78 | NAALAD2 | ENST00000534061 | p.D377E            | c.1131    | 0.198707283 | 6.015 | 1 |
| 78 | NAALAD2 | ENST00000534061 | p.E387K            | c.1159    | 0.209283153 | 9.298 | 1 |
| 78 | NAALAD2 | ENST00000534061 | p.N441K            | c.1323    | 0.310865043 | 3.548 | 1 |
| 78 | NAALAD2 | ENST00000534061 | p.S442L            | c.1325    | 0.472604605 | 2.963 | 1 |
| 78 | NAALAD2 | ENST00000534061 | p.D443G            | c.1328    | 0.685573964 | 2.897 | 1 |
| 78 | NAALAD2 | ENST00000534061 | p.S445C            | c.1334    | 0.30839966  | 3.542 | 1 |
| 78 | NAALAD2 | ENST00000534061 | p.M55I             | c.165     | 0.249648501 | 6.025 | 1 |
| 78 | NAALAD2 | ENST00000534061 | p.A567T            | c.1699    | 0.141665466 | 9.44  | 1 |
| 78 | NAALAD2 | ENST00000534061 | p.R570Q            | c.1709    | 2.48427909  | 0     | 3 |
| 79 | STAT1   | ENST00000409465 | p.S452Y            | c.1355    | 0.049945139 | 9.781 | 1 |
| 79 | STAT1   | ENST00000409465 | p.A479V            | c.1436    | 0.260788388 | 2.964 | 1 |
| 79 | STAT1   | ENST00000409465 | p.R482M            | c.1445    | 0.106830694 | 4.841 | 1 |
| 79 | STAT1   | ENST00000409465 | p.R241W            | c.721     | 1.164186082 | 0     | 2 |
| 81 | ARHGDI  | ENST00000541644 | p.V115M            | c.343     | 0.00537321  | 7.54  | 1 |
| 81 | ARHGDI  | ENST00000541644 | p.G144C            | c.430     | 0.00537321  | 0     | 1 |
| 82 | XPO5    | ENST00000265351 | p.R452C            | c.1354    | 0.00728932  | 7.1   | 1 |
| 82 | XPO5    | ENST00000265351 | p.R519Q            | c.1556    | 0.00728932  | 0     | 1 |
| 83 | HMGCL   | ENST00000374490 | p.G112C            | c.334     | 0.015345931 | 0     | 1 |
| 83 | HMGCL   | ENST00000374490 | p.S159L            | c.476     | 0.015345931 | 6.026 | 1 |
| 84 | REN     | ENST00000272190 | p.R43Q             | c.128     | 0.062624747 | 9.024 | 1 |
| 84 | REN     | ENST00000272190 | p.S107L            | c.320     | 0.182216573 | 5.872 | 1 |
| 84 | REN     | ENST00000272190 | p.R148C            | c.442     | 1.175905089 | 0     | 1 |

|            |                 |          |        |             |       |   |
|------------|-----------------|----------|--------|-------------|-------|---|
| 84 REN     | ENST00000272190 | p.R148H  | c.443  | 1.175905089 | 0     | 1 |
| 84 REN     | ENST00000272190 | p.A182V  | c.545  | 0.049976706 | 6.631 | 1 |
| 84 REN     | ENST00000272190 | p.Q201L  | c.602  | 0.247887678 | 4.576 | 1 |
| 84 REN     | ENST00000272190 | p.L312F  | c.936  | 0.244336725 | 3.253 | 1 |
| 85 SI      | ENST00000264382 | p.L624V  | c.1870 | 0.006574058 | 7.249 | 1 |
| 85 SI      | ENST00000264382 | p.C283S  | c.848  | 0.006574058 | 0     | 1 |
| 86 SI      | ENST00000264382 | p.D427G  | c.1280 | 0.415647612 | 9.485 | 1 |
| 86 SI      | ENST00000264382 | p.E466K  | c.1396 | 0.096377772 | 4.608 | 1 |
| 86 SI      | ENST00000264382 | p.D505E  | c.1515 | 0.118683904 | 9.897 | 1 |
| 86 SI      | ENST00000264382 | p.M506V  | c.1516 | 0.268311866 | 6.313 | 1 |
| 86 SI      | ENST00000264382 | p.S510P  | c.1528 | 1.194053388 | 0     | 1 |
| 86 SI      | ENST00000264382 | p.S510Y  | c.1529 | 1.194053388 | 0     | 1 |
| 86 SI      | ENST00000264382 | p.D264G  | c.791  | 0.39257363  | 2.857 | 1 |
| 87 MEP1B   | ENST00000269202 | p.Y346H  | c.1036 | 0.156237335 | 3.526 | 1 |
| 87 MEP1B   | ENST00000269202 | p.I380T  | c.1139 | 0.085198278 | 8.689 | 1 |
| 87 MEP1B   | ENST00000269202 | p.W385C  | c.1155 | 0.160150689 | 0     | 1 |
| 87 MEP1B   | ENST00000269202 | p.I434T  | c.1301 | 0.096065965 | 7.472 | 1 |
| 87 MEP1B   | ENST00000269202 | p.D578N  | c.1732 | 0.158124032 | 4.005 | 1 |
| 87 MEP1B   | ENST00000269202 | p.R293W  | c.877  | 0.037579752 | 8.38  | 1 |
| 88 DARS    | ENST00000264161 | p.L80I   | c.238  | 0.015953314 | 5.97  | 1 |
| 88 DARS    | ENST00000264161 | p.V139I  | c.415  | 0.021546942 | 0     | 1 |
| 88 DARS    | ENST00000264161 | p.Y29F   | c.86   | 0.005593628 | 7.482 | 1 |
| 89 NCAM1   | ENST00000524665 | p.A464G  | c.1391 | 0.008680537 | 6.848 | 1 |
| 89 NCAM1   | ENST00000524665 | p.P465Q  | c.1394 | 0.017253107 | 5.857 | 1 |
| 89 NCAM1   | ENST00000524665 | p.P491S  | c.1471 | 0.025933644 | 0     | 1 |
| 90 PPP2R1A | ENST00000322088 | p.R105Q  | c.314  | 0.19562623  | 9.474 | 1 |
| 90 PPP2R1A | ENST00000322088 | p.S143F  | c.428  | 0.245795419 | 7.146 | 1 |
| 90 PPP2R1A | ENST00000322088 | p.R144C  | c.430  | 2.017673887 | 3.954 | 1 |
| 90 PPP2R1A | ENST00000322088 | p.R144H  | c.431  | 2.017673887 | 3.954 | 1 |
| 90 PPP2R1A | ENST00000322088 | p.T145P  | c.433  | 0.460030453 | 6.313 | 1 |
| 90 PPP2R1A | ENST00000322088 | p.L173M  | c.517  | 0.366856295 | 7.5   | 1 |
| 90 PPP2R1A | ENST00000322088 | p.P179R  | c.536  | 7.298162631 | 0     | 8 |
| 90 PPP2R1A | ENST00000322088 | p.R183W  | c.547  | 6.362422002 | 7.405 | 5 |
| 90 PPP2R1A | ENST00000322088 | p.R183Q  | c.548  | 6.362422002 | 7.405 | 2 |
| 90 PPP2R1A | ENST00000322088 | p.D215H  | c.643  | 0.228419611 | 5.689 | 1 |
| 90 PPP2R1A | ENST00000322088 | p.V220M  | c.658  | 1.497369249 | 3.965 | 1 |
| 90 PPP2R1A | ENST00000322088 | p.R258C  | c.772  | 4.236709803 | 8.132 | 2 |
| 90 PPP2R1A | ENST00000322088 | p.R258H  | c.773  | 4.236709803 | 8.132 | 3 |
| 91 AKR1D1  | ENST00000242375 | p.L147M  | c.439  | 0.009303569 | 0     | 1 |
| 91 AKR1D1  | ENST00000242375 | p.V168M  | c.502  | 0.009303569 | 6.748 | 1 |
| 92 PTPRT   | ENST00000373198 | p.Y970C  | c.2909 | 0.122642054 | 4.736 | 1 |
| 92 PTPRT   | ENST00000373198 | p.H975Y  | c.2923 | 0.010517969 | 7.571 | 1 |
| 92 PTPRT   | ENST00000373198 | p.P982L  | c.2945 | 0.145762408 | 7.151 | 1 |
| 92 PTPRT   | ENST00000373198 | p.R1018Q | c.3053 | 1.085423231 | 0     | 2 |
| 92 PTPRT   | ENST00000373198 | p.H1072N | c.3214 | 0.011396101 | 8.255 | 1 |
| 92 PTPRT   | ENST00000373198 | p.L1081F | c.3241 | 0.065872396 | 4.951 | 1 |
| 93 CLASP1  | ENST00000263710 | p.L353V  | c.1057 | 0.018909001 | 0     | 1 |
| 93 CLASP1  | ENST00000263710 | p.A305T  | c.913  | 0.008930768 | 6.807 | 1 |
| 93 CLASP1  | ENST00000263710 | p.I314M  | c.942  | 0.009978232 | 6.647 | 1 |

|            |                 |          |        |             |       |   |
|------------|-----------------|----------|--------|-------------|-------|---|
| 94 FCAR    | ENST00000345937 | p.M61I   | c.183  | 1.11132324  | 0     | 2 |
| 94 FCAR    | ENST00000345937 | p.R97G   | c.289  | 0.340705839 | 4.164 | 1 |
| 94 FCAR    | ENST00000345937 | p.R103K  | c.308  | 0.081016865 | 4.95  | 1 |
| 94 FCAR    | ENST00000345937 | p.F109I  | c.325  | 0.013734993 | 7.186 | 1 |
| 94 FCAR    | ENST00000345937 | p.R110W  | c.328  | 0.027861307 | 7.472 | 1 |
| 95 BACH2   | ENST00000257749 | p.Y61C   | c.182  | 0.110201524 | 3.557 | 1 |
| 95 BACH2   | ENST00000257749 | p.L78V   | c.232  | 0.035361133 | 5.593 | 1 |
| 95 BACH2   | ENST00000257749 | p.E80K   | c.238  | 0.02651151  | 6.411 | 1 |
| 95 BACH2   | ENST00000257749 | p.V82F   | c.244  | 0.197739436 | 3.538 | 1 |
| 95 BACH2   | ENST00000257749 | p.C112F  | c.335  | 0.192543446 | 7.177 | 1 |
| 95 BACH2   | ENST00000257749 | p.F115L  | c.345  | 0.210434547 | 0     | 1 |
| 97 ADH4    | ENST00000508393 | p.G390E  | c.1169 | 0.062543337 | 3.999 | 1 |
| 97 ADH4    | ENST00000508393 | p.K253T  | c.758  | 0.062543337 | 0     | 1 |
| 98 C3      | ENST00000245907 | p.F829L  | c.2487 | 0.1180453   | 0     | 1 |
| 98 C3      | ENST00000245907 | p.V850G  | c.2549 | 0.091628613 | 6.678 | 1 |
| 98 C3      | ENST00000245907 | p.L860F  | c.2578 | 0.09410191  | 3.432 | 1 |
| 98 C3      | ENST00000245907 | p.G924V  | c.2771 | 0.04459989  | 6     | 1 |
| 99 TCERG1  | ENST00000296702 | p.R1032G | c.3094 | 0.014528202 | 6.105 | 1 |
| 99 TCERG1  | ENST00000296702 | p.V1075A | c.3224 | 0.014528202 | 0     | 1 |
| 100 HFE    | ENST00000357618 | p.E48K   | c.142  | 0.026588421 | 7.368 | 1 |
| 100 HFE    | ENST00000357618 | p.R71Q   | c.212  | 1.016469958 | 0     | 2 |
| 100 HFE    | ENST00000357618 | p.G260V  | c.779  | 0.020832792 | 6.585 | 1 |
| 101 GABBR2 | ENST00000259455 | p.F428V  | c.1282 | 0.011249463 | 6.474 | 1 |
| 101 GABBR2 | ENST00000259455 | p.P184L  | c.551  | 0.011249463 | 0     | 1 |
| 102 PTPN11 | ENST00000351677 | p.V428M  | c.1282 | 0.094049056 | 6.727 | 1 |
| 102 PTPN11 | ENST00000351677 | p.I463L  | c.1387 | 0.178566923 | 4.931 | 1 |
| 102 PTPN11 | ENST00000351677 | p.T468M  | c.1403 | 3.319684691 | 3.722 | 4 |
| 102 PTPN11 | ENST00000351677 | p.Q510L  | c.1529 | 3.345349104 | 0     | 2 |
| 102 PTPN11 | ENST00000351677 | p.Q510H  | c.1530 | 3.345349104 | 0     | 2 |
| 103 DDB1   | ENST00000301764 | p.N36T   | c.107  | 0.246010829 | 5.668 | 1 |
| 103 DDB1   | ENST00000301764 | p.E1002K | c.3004 | 0.236155672 | 7.981 | 1 |
| 103 DDB1   | ENST00000301764 | p.G1035S | c.3103 | 0.055165274 | 6.459 | 1 |
| 103 DDB1   | ENST00000301764 | p.R327C  | c.979  | 1.034993152 | 0     | 2 |
| 104 HGF    | ENST00000222390 | p.R134H  | c.401  | 0.262909949 | 5.947 | 1 |
| 104 HGF    | ENST00000222390 | p.Y136C  | c.407  | 0.445048643 | 2.905 | 1 |
| 104 HGF    | ENST00000222390 | p.T139K  | c.416  | 0.126179235 | 4.401 | 1 |
| 104 HGF    | ENST00000222390 | p.C149Y  | c.446  | 0.209380456 | 6.718 | 1 |
| 104 HGF    | ENST00000222390 | p.N175S  | c.524  | 0.272527953 | 9.525 | 1 |
| 104 HGF    | ENST00000222390 | p.R178Q  | c.533  | 1.232388086 | 0     | 2 |
| 104 HGF    | ENST00000222390 | p.R181P  | c.542  | 0.161868552 | 8.732 | 1 |
| 104 HGF    | ENST00000222390 | p.P187S  | c.559  | 1.111510976 | 6.751 | 2 |
| 104 HGF    | ENST00000222390 | p.P204S  | c.610  | 0.115162945 | 9.649 | 1 |
| 104 HGF    | ENST00000222390 | p.V209I  | c.625  | 0.218997838 | 8.755 | 1 |
| 105 CYP2B6 | ENST00000324071 | p.R358I  | c.1073 | 0.358264795 | 2.741 | 1 |
| 105 CYP2B6 | ENST00000324071 | p.L392M  | c.1174 | 0.323787849 | 9.957 | 1 |
| 105 CYP2B6 | ENST00000324071 | p.K404E  | c.1210 | 0.064016234 | 7.084 | 1 |
| 105 CYP2B6 | ENST00000324071 | p.A407S  | c.1219 | 1.178691592 | 0     | 1 |
| 105 CYP2B6 | ENST00000324071 | p.A407T  | c.1219 | 1.178691592 | 0     | 1 |
| 105 CYP2B6 | ENST00000324071 | p.L470V  | c.1408 | 0.021990978 | 6.611 | 1 |

|             |                 |          |           |             |       |   |
|-------------|-----------------|----------|-----------|-------------|-------|---|
| 105 CYP2B6  | ENST00000324071 | p.L88P   | c.263     | 0.052668764 | 6.573 | 1 |
| 106 CYP2A13 | ENST00000330436 | p.D169N  | c.505     | 0.099569226 | 7.38  | 1 |
| 106 CYP2A13 | ENST00000330436 | p.R203C  | c.607     | 2.006003419 | 0     | 3 |
| 107 PTPRF   | ENST00000359947 | p.R1725L | c.5174    | 0.491128071 | 2.82  | 1 |
| 107 PTPRF   | ENST00000359947 | p.A1787S | c.5359    | 1.119463932 | 6.272 | 1 |
| 107 PTPRF   | ENST00000359947 | p.A1787V | c.5360    | 1.119463932 | 6.272 | 1 |
| 107 PTPRF   | ENST00000359947 | p.R1788Q | c.5363    | 1.170907947 | 0     | 2 |
| 107 PTPRF   | ENST00000359947 | p.D1789N | c.5365    | 0.07762196  | 8.193 | 1 |
| 108 MTPAP   | ENST00000358107 | p.A204T  | c.610     | 0.009578397 | 6.706 | 1 |
| 108 MTPAP   | ENST00000358107 | p.R206W  | c.616     | 0.050101583 | 4.319 | 1 |
| 108 MTPAP   | ENST00000358107 | p.V246I  | c.736     | 0.05967998  | 0     | 1 |
| 109 HBB     | ENST00000335295 | p.G75C   | c.223     | 0.255430993 | 2.621 | 1 |
| 109 HBB     | ENST00000335295 | p.L79M   | c.235     | 0.367166698 | 2.008 | 1 |
| 109 HBB     | ENST00000335295 | p.E8D    | c.24      | 0.679029025 | 0     | 1 |
| 109 HBB     | ENST00000335295 | p.P126T  | c.376     | 0.428278004 | 2.579 | 1 |
| 109 HBB     | ENST00000335295 | p.A129S  | c.385     | 0.108065948 | 3.896 | 1 |
| 109 HBB     | ENST00000335295 | p.A14S   | c.40      | 0.235033031 | 5.046 | 1 |
| 109 HBB     | ENST00000335295 | p.V135L  | c.403     | 0.015360102 | 8.353 | 1 |
| 110 RPL5    | ENST00000370321 | p.G91N   | c.271_272 | 0.081734524 | 3.663 | 1 |
| 110 RPL5    | ENST00000370321 | p.A97G   | c.290     | 0.002847691 | 9.097 | 1 |
| 110 RPL5    | ENST00000370321 | p.A205V  | c.614     | 0.00535462  | 7.545 | 1 |
| 110 RPL5    | ENST00000370321 | p.Y226H  | c.676     | 0.086126198 | 0     | 1 |
| 111 PYGM    | ENST00000164139 | p.T484I  | c.1451    | 0.179914864 | 2.665 | 1 |
| 111 PYGM    | ENST00000164139 | p.G486S  | c.1456    | 0.044048197 | 4.716 | 1 |
| 111 PYGM    | ENST00000164139 | p.R816G  | c.2446    | 0.198282251 | 0     | 1 |
| 111 PYGM    | ENST00000164139 | p.Y821H  | c.2461    | 0.018804565 | 8.609 | 1 |
| 112 TF      | ENST00000402696 | p.K452N  | c.1356    | 0.140202279 | 2.847 | 1 |
| 112 TF      | ENST00000402696 | p.A455S  | c.1363    | 0.009976494 | 6.835 | 1 |
| 112 TF      | ENST00000402696 | p.G547E  | c.1640    | 0.147744005 | 0     | 1 |
| 113 PRSS3   | ENST00000361005 | p.N146H  | c.436     | 0.043101782 | 0     | 1 |
| 113 PRSS3   | ENST00000361005 | p.V175A  | c.524     | 0.010138584 | 6.624 | 1 |
| 113 PRSS3   | ENST00000361005 | p.R179H  | c.536     | 0.032963197 | 4.923 | 1 |
| 114 IGF2R   | ENST00000356956 | p.D2070E | c.6210    | 0.025683756 | 0     | 1 |
| 114 IGF2R   | ENST00000356956 | p.A2124T | c.6370    | 0.025683756 | 5.283 | 1 |
| 115 MAT2B   | ENST00000321757 | p.A178P  | c.532     | 0.035576482 | 8.095 | 1 |
| 115 MAT2B   | ENST00000321757 | p.V179F  | c.535     | 0.018148574 | 6.784 | 1 |
| 115 MAT2B   | ENST00000321757 | p.H215Q  | c.645     | 0.098334557 | 7.787 | 1 |
| 115 MAT2B   | ENST00000321757 | p.M239I  | c.717     | 0.377734854 | 3.445 | 1 |
| 115 MAT2B   | ENST00000321757 | p.P27S   | c.79      | 1.120417923 | 0     | 1 |
| 115 MAT2B   | ENST00000321757 | p.P27H   | c.80      | 1.120417923 | 0     | 1 |
| 115 MAT2B   | ENST00000321757 | p.R289C  | c.865     | 1.078345181 | 7.463 | 1 |
| 115 MAT2B   | ENST00000321757 | p.R289H  | c.866     | 1.078345181 | 7.463 | 1 |
| 116 ACP1    | ENST00000272065 | p.A46T   | c.136     | 0.09882364  | 0     | 1 |
| 116 ACP1    | ENST00000272065 | p.L14V   | c.40      | 0.09882364  | 3.339 | 1 |
| 117 PTEN    | ENST00000371953 | p.Y46H   | c.136     | 0.413699317 | 9.951 | 1 |
| 117 PTEN    | ENST00000371953 | p.Y68N   | c.202     | 2.390297278 | 9.726 | 1 |
| 117 PTEN    | ENST00000371953 | p.Y68C   | c.203     | 2.390297278 | 9.726 | 1 |
| 117 PTEN    | ENST00000371953 | p.L70H   | c.209     | 5.927272214 | 3.587 | 1 |
| 117 PTEN    | ENST00000371953 | p.C71Y   | c.212     | 5.122446591 | 4.072 | 2 |

|     |        |                 |                           |           |             |       |    |
|-----|--------|-----------------|---------------------------|-----------|-------------|-------|----|
| 117 | PTEN   | ENST00000371953 | p.F90S                    | c.269     | 7.715704853 | 2.989 | 1  |
| 117 | PTEN   | ENST00000371953 | p.D92H                    | c.274     | 9.329032304 | 3.545 | 1  |
| 117 | PTEN   | ENST00000371953 | p.D92Y                    | c.274     | 9.329032304 | 3.545 | 1  |
| 117 | PTEN   | ENST00000371953 | p.D92G                    | c.275     | 9.329032304 | 3.545 | 1  |
| 117 | PTEN   | ENST00000371953 | p.D92E                    | c.276     | 9.329032304 | 3.545 | 2  |
| 117 | PTEN   | ENST00000371953 | p.H93L                    | c.278     | 5.005043401 | 4.466 | 1  |
| 117 | PTEN   | ENST00000371953 | p.H93R                    | c.278     | 5.005043401 | 4.466 | 2  |
| 117 | PTEN   | ENST00000371953 | p.P95L                    | c.284     | 0.867925039 | 8.029 | 1  |
| 117 | PTEN   | ENST00000371953 | p.P96A                    | c.286     | 1.336632939 | 9.847 | 1  |
| 117 | PTEN   | ENST00000371953 | p.P96T                    | c.286     | 1.336632939 | 9.847 | 1  |
| 117 | PTEN   | ENST00000371953 | p.H123D                   | c.367     | 5.644376973 | 6.646 | 2  |
| 117 | PTEN   | ENST00000371953 | p.H123Y                   | c.367     | 5.644376973 | 6.646 | 2  |
| 117 | PTEN   | ENST00000371953 | p.H123L                   | c.368     | 5.644376973 | 6.646 | 1  |
| 117 | PTEN   | ENST00000371953 | p.C124R                   | c.370     | 0.947272395 | 7.251 | 1  |
| 117 | PTEN   | ENST00000371953 | p.KAGKGRGV125in_frame_del | c.373_399 | 2.784531773 | 6.595 | 1  |
| 117 | PTEN   | ENST00000371953 | p.K125N                   | c.375     | 2.784531773 | 6.595 | 1  |
| 117 | PTEN   | ENST00000371953 | p.G127R                   | c.379     | 3.87047826  | 9.287 | 3  |
| 117 | PTEN   | ENST00000371953 | p.G127V                   | c.380     | 3.87047826  | 9.287 | 1  |
| 117 | PTEN   | ENST00000371953 | p.K128Q                   | c.382     | 3.399057354 | 8.882 | 2  |
| 117 | PTEN   | ENST00000371953 | p.K128N                   | c.384     | 3.399057354 | 8.882 | 1  |
| 117 | PTEN   | ENST00000371953 | p.G129E                   | c.386     | 3.864313046 | 7.305 | 2  |
| 117 | PTEN   | ENST00000371953 | p.G129V                   | c.386     | 3.864313046 | 7.305 | 2  |
| 117 | PTEN   | ENST00000371953 | p.R130G                   | c.388     | 58.12861928 | 0     | 26 |
| 117 | PTEN   | ENST00000371953 | p.R130L                   | c.389     | 58.12861928 | 0     | 5  |
| 117 | PTEN   | ENST00000371953 | p.R130P                   | c.389     | 58.12861928 | 0     | 4  |
| 117 | PTEN   | ENST00000371953 | p.R130Q                   | c.389     | 58.12861928 | 0     | 23 |
| 117 | PTEN   | ENST00000371953 | p.T131A                   | c.391     | 0.906423223 | 7.144 | 1  |
| 117 | PTEN   | ENST00000371953 | p.G132D                   | c.395     | 1.411028517 | 9.291 | 2  |
| 117 | PTEN   | ENST00000371953 | p.M134in_frame_del        | c.400_402 | 2.154802888 | 6.843 | 1  |
| 117 | PTEN   | ENST00000371953 | p.M134I                   | c.402     | 2.154802888 | 6.843 | 1  |
| 117 | PTEN   | ENST00000371953 | p.Y155C                   | c.464     | 2.376271263 | 5.997 | 1  |
| 117 | PTEN   | ENST00000371953 | p.Q171K                   | c.511     | 4.784147755 | 3.96  | 1  |
| 117 | PTEN   | ENST00000371953 | p.H272P                   | c.815     | 1.550471222 | 9.723 | 1  |
| 117 | PTEN   | ENST00000371953 | p.H272R                   | c.815     | 1.550471222 | 9.723 | 1  |
| 117 | PTEN   | ENST00000371953 | p.D326G                   | c.977     | 1.394102772 | 9.083 | 1  |
| 118 | PTPN23 | ENST00000265562 | p.M243I                   | c.729     | 0.00675888  | 7.209 | 1  |
| 118 | PTPN23 | ENST00000265562 | p.A297T                   | c.889     | 0.00675888  | 0     | 1  |
| 119 | PARP1  | ENST00000366794 | p.R847C                   | c.2539    | 0.010776257 | 6.536 | 1  |
| 119 | PARP1  | ENST00000366794 | p.I895T                   | c.2684    | 0.010776257 | 0     | 1  |
| 120 | ANPEP  | ENST00000300060 | p.T88M                    | c.263     | 1.078318463 | 0     | 2  |
| 120 | ANPEP  | ENST00000300060 | p.F182L                   | c.546     | 0.198962417 | 4.646 | 1  |
| 120 | ANPEP  | ENST00000300060 | p.S220F                   | c.659     | 0.215774604 | 6.532 | 1  |
| 120 | ANPEP  | ENST00000300060 | p.L237F                   | c.709     | 0.185281553 | 5.35  | 1  |
| 120 | ANPEP  | ENST00000300060 | p.F282L                   | c.844     | 0.248915604 | 9.299 | 1  |
| 120 | ANPEP  | ENST00000300060 | p.I283V                   | c.847     | 0.066591014 | 9.414 | 1  |
| 121 | RAC1   | ENST00000356142 | p.K135R                   | c.404     | 1.729902486 | 7.256 | 1  |
| 121 | RAC1   | ENST00000356142 | p.K135N                   | c.405     | 1.729902486 | 7.256 | 1  |
| 121 | RAC1   | ENST00000356142 | p.G15S                    | c.43      | 0.407839542 | 8.136 | 1  |
| 121 | RAC1   | ENST00000356142 | p.C18F                    | c.53      | 1.691769746 | 6.084 | 1  |



|             |                 |                        |           |             |       |   |
|-------------|-----------------|------------------------|-----------|-------------|-------|---|
| 121 RAC1    | ENST00000356142 | p.C18Y                 | c.53      | 1.691769746 | 6.084 | 1 |
| 121 RAC1    | ENST00000356142 | p.A178V                | c.533     | 2.532499981 | 3.817 | 2 |
| 121 RAC1    | ENST00000356142 | p.P29S                 | c.85      | 11.18802702 | 0     | 9 |
| 121 RAC1    | ENST00000356142 | p.P29T                 | c.85      | 11.18802702 | 0     | 1 |
| 121 RAC1    | ENST00000356142 | p.P29L                 | c.86      | 11.18802702 | 0     | 2 |
| 122 MAPK14  | ENST00000229795 | p.RVAVKK49in_frame_del | c.145_162 | 0.019290041 | 6.696 | 1 |
| 122 MAPK14  | ENST00000229795 | p.V158M                | c.472     | 1.00964502  | 0     | 2 |
| 123 S100A16 | ENST00000368704 | p.R73C                 | c.217     | 0.012735505 | 6.295 | 1 |
| 123 S100A16 | ENST00000368704 | p.K30N                 | c.90      | 0.012735505 | 0     | 1 |
| 124 DUSP9   | ENST00000370167 | p.D259N                | c.775     | 0.141494473 | 0     | 1 |
| 124 DUSP9   | ENST00000370167 | p.N332I                | c.995     | 0.070586045 | 3.93  | 1 |
| 124 DUSP9   | ENST00000370167 | p.F333I                | c.997     | 0.080865933 | 3.72  | 1 |
| 125 GRM1    | ENST00000282753 | p.W224C                | c.672     | 0.024618287 | 9.25  | 1 |
| 125 GRM1    | ENST00000282753 | p.S228F                | c.683     | 0.230508455 | 3.435 | 1 |
| 125 GRM1    | ENST00000282753 | p.A229S                | c.685     | 0.141551349 | 5.614 | 1 |
| 125 GRM1    | ENST00000282753 | p.A256T                | c.766     | 0.288818337 | 0     | 1 |
| 125 GRM1    | ENST00000282753 | p.S258C                | c.773     | 0.154084579 | 8.832 | 1 |
| 125 GRM1    | ENST00000282753 | p.R280M                | c.839     | 0.178698728 | 3.394 | 1 |
| 125 GRM1    | ENST00000282753 | p.A284D                | c.851     | 0.183340555 | 3.724 | 1 |
| 125 GRM1    | ENST00000282753 | p.E311K                | c.931     | 0.019449464 | 9.59  | 1 |
| 126 SNX7    | ENST00000306121 | p.A151P                | c.451     | 1.025174028 | 0     | 1 |
| 126 SNX7    | ENST00000306121 | p.A151G                | c.452     | 1.025174028 | 0     | 1 |
| 126 SNX7    | ENST00000306121 | p.T197A                | c.589     | 0.013696964 | 7.19  | 1 |
| 126 SNX7    | ENST00000306121 | p.D203H                | c.607     | 1.018325546 | 6.77  | 1 |
| 126 SNX7    | ENST00000306121 | p.D203Y                | c.607     | 1.018325546 | 6.77  | 1 |
| 127 LRRC4C  | ENST00000528697 | p.K92N                 | c.276     | 0.250208305 | 3.653 | 1 |
| 127 LRRC4C  | ENST00000528697 | p.S95I                 | c.284     | 0.015304079 | 7.726 | 1 |
| 127 LRRC4C  | ENST00000528697 | p.E116K                | c.346     | 2.154804035 | 0     | 3 |
| 127 LRRC4C  | ENST00000528697 | p.N141K                | c.423     | 0.033192084 | 7.206 | 1 |
| 127 LRRC4C  | ENST00000528697 | p.A143T                | c.427     | 0.197646866 | 3.97  | 1 |
| 128 OGT     | ENST00000373719 | p.Y418C                | c.1253    | 0.033137229 | 6.621 | 1 |
| 128 OGT     | ENST00000373719 | p.T419M                | c.1256    | 0.275843052 | 2.925 | 1 |
| 128 OGT     | ENST00000373719 | p.G528D                | c.1583    | 0.347525148 | 0     | 1 |
| 128 OGT     | ENST00000373719 | p.N529K                | c.1587    | 0.200477342 | 6.235 | 1 |
| 128 OGT     | ENST00000373719 | p.D533H                | c.1597    | 0.031016091 | 9.064 | 1 |
| 128 OGT     | ENST00000373719 | p.M639I                | c.1917    | 0.021889789 | 6.704 | 1 |
| 128 OGT     | ENST00000373719 | p.Y642H                | c.1924    | 0.229125262 | 3.039 | 1 |
| 128 OGT     | ENST00000373719 | p.A671V                | c.2012    | 0.165597202 | 4.076 | 1 |
| 129 CRYBB2  | ENST00000398215 | p.K108N                | c.324     | 0.229234897 | 3.827 | 1 |
| 129 CRYBB2  | ENST00000398215 | p.R145Q                | c.434     | 1.076213412 | 0     | 1 |
| 129 CRYBB2  | ENST00000398215 | p.R145P                | c.434_435 | 1.076213412 | 0     | 1 |
| 129 CRYBB2  | ENST00000398215 | p.T150M                | c.449     | 0.175131212 | 7.442 | 1 |
| 130 GC      | ENST00000504199 | p.D396N                | c.1186    | 0.190408188 | 5.604 | 1 |
| 130 GC      | ENST00000504199 | p.R69T                 | c.206     | 0.360738646 | 0     | 1 |
| 130 GC      | ENST00000504199 | p.S73R                 | c.217     | 0.040946444 | 9.588 | 1 |
| 130 GC      | ENST00000504199 | p.H147P                | c.440     | 0.202058319 | 2.898 | 1 |
| 130 GC      | ENST00000504199 | p.S240T                | c.718     | 0.020233525 | 9.824 | 1 |
| 130 GC      | ENST00000504199 | p.C285Y                | c.854     | 0.093312793 | 4.116 | 1 |
| 130 GC      | ENST00000504199 | p.E286K                | c.856     | 0.333462049 | 2.926 | 1 |

|     |        |                 |                          |             |             |       |   |
|-----|--------|-----------------|--------------------------|-------------|-------------|-------|---|
| 130 | GC     | ENST00000504199 | p.S287F                  | c.860       | 0.018186062 | 6.121 | 1 |
| 131 | PDGFRB | ENST00000261799 | p.V823I                  | c.2467      | 0.077858588 | 3.683 | 1 |
| 131 | PDGFRB | ENST00000261799 | p.R849G                  | c.2545      | 0.077858588 | 0     | 1 |
| 132 | AGTR1  | ENST00000404754 | p.I130F                  | c.388       | 0.01766454  | 5.823 | 1 |
| 132 | AGTR1  | ENST00000404754 | p.D237N                  | c.709       | 0.01766454  | 0     | 1 |
| 133 | B2M    | ENST00000559916 | p.V47M                   | c.139       | 0.546908006 | 2.41  | 1 |
| 133 | B2M    | ENST00000559916 | p.H51P                   | c.152       | 0.291694227 | 2.866 | 1 |
| 133 | B2M    | ENST00000559916 | p.D54N                   | c.160       | 0.219666436 | 3.632 | 1 |
| 133 | B2M    | ENST00000559916 | p.A6V                    | c.17        | 0.030855348 | 8.422 | 1 |
| 133 | B2M    | ENST00000559916 | p.SKDWSFY77in_frame_delN | c.230_247   | 0.071750346 | 7.762 | 1 |
| 133 | B2M    | ENST00000559916 | p.Y83F                   | c.248       | 0.594248946 | 0     | 1 |
| 133 | B2M    | ENST00000559916 | p.P92A                   | c.274       | 0.267574809 | 5.577 | 1 |
| 133 | B2M    | ENST00000559916 | p.E94K                   | c.280       | 0.233524137 | 5.077 | 1 |
| 133 | B2M    | ENST00000559916 | p.R3C                    | c.7         | 0.142273416 | 6.198 | 1 |
| 133 | B2M    | ENST00000559916 | p.Y30H                   | c.88        | 0.340111208 | 3.101 | 1 |
| 134 | PUM1   | ENST00000373741 | p.V1003A                 | c.3008      | 0.006948898 | 7.169 | 1 |
| 134 | PUM1   | ENST00000373741 | p.A1030V                 | c.3089      | 0.006948898 | 0     | 1 |
| 135 | MPO    | ENST00000340482 | p.E443K                  | c.1327      | 0.311872223 | 5.3   | 1 |
| 135 | MPO    | ENST00000340482 | p.R492Q                  | c.1475      | 0.203992502 | 8.987 | 1 |
| 135 | MPO    | ENST00000340482 | p.D493G                  | c.1478      | 0.118304347 | 9.135 | 1 |
| 135 | MPO    | ENST00000340482 | p.G533S                  | c.1597      | 0.163920224 | 3.853 | 1 |
| 135 | MPO    | ENST00000340482 | p.R543C                  | c.1627      | 0.271114308 | 6.558 | 1 |
| 135 | MPO    | ENST00000340482 | p.E572K                  | c.1714      | 0.200688253 | 9.128 | 1 |
| 135 | MPO    | ENST00000340482 | p.I578V                  | c.1732      | 0.24711128  | 8.746 | 1 |
| 135 | MPO    | ENST00000340482 | p.L579F                  | c.1735      | 1.113065976 | 0     | 1 |
| 135 | MPO    | ENST00000340482 | p.L579P                  | c.1736      | 1.113065976 | 0     | 1 |
| 137 | EGFR   | ENST00000275493 | p.F712L                  | c.2136      | 0.449520158 | 9.933 | 1 |
| 137 | EGFR   | ENST00000275493 | p.G721V                  | c.2162      | 0.379436077 | 6.501 | 1 |
| 137 | EGFR   | ENST00000275493 | p.LRE747in_frame_del     | c.2236_2244 | 1.485753755 | 3.391 | 1 |
| 137 | EGFR   | ENST00000275493 | p.V769L                  | c.2305      | 0.590964287 | 5.484 | 1 |
| 137 | EGFR   | ENST00000275493 | p.I789M                  | c.2367      | 0.607598771 | 8.024 | 1 |
| 137 | EGFR   | ENST00000275493 | p.T790M                  | c.2369      | 1.13102416  | 7.275 | 1 |
| 137 | EGFR   | ENST00000275493 | p.R831H                  | c.2492      | 1.426356714 | 8.933 | 1 |
| 137 | EGFR   | ENST00000275493 | p.R832C                  | c.2494      | 1.804391348 | 9.841 | 1 |
| 137 | EGFR   | ENST00000275493 | p.R832H                  | c.2495      | 1.804391348 | 9.841 | 1 |
| 137 | EGFR   | ENST00000275493 | p.L833V                  | c.2497      | 1.940841816 | 5.541 | 1 |
| 137 | EGFR   | ENST00000275493 | p.L833F                  | c.2499      | 1.940841816 | 5.541 | 1 |
| 137 | EGFR   | ENST00000275493 | p.A839V                  | c.2516      | 0.751626111 | 9.836 | 1 |
| 137 | EGFR   | ENST00000275493 | p.L858R                  | c.2573      | 8.219600976 | 0     | 9 |
| 137 | EGFR   | ENST00000275493 | p.L861Q                  | c.2582      | 4.540138193 | 6.998 | 3 |
| 137 | EGFR   | ENST00000275493 | p.L861R                  | c.2582      | 4.540138193 | 6.998 | 1 |
| 138 | PLG    | ENST00000308192 | p.P466L                  | c.1397      | 0.02090806  | 8.619 | 1 |
| 138 | PLG    | ENST00000308192 | p.S613F                  | c.1838      | 0.139888742 | 8.111 | 1 |
| 138 | PLG    | ENST00000308192 | p.E625D                  | c.1875      | 0.102028326 | 8.002 | 1 |
| 138 | PLG    | ENST00000308192 | p.R663Q                  | c.1988      | 0.426817512 | 2.637 | 1 |
| 138 | PLG    | ENST00000308192 | p.D665H                  | c.1993      | 0.271909232 | 4.232 | 1 |
| 138 | PLG    | ENST00000308192 | p.V692A                  | c.2075      | 0.146198142 | 5.935 | 1 |
| 138 | PLG    | ENST00000308192 | p.R696Q                  | c.2087      | 0.428771832 | 7.588 | 1 |
| 138 | PLG    | ENST00000308192 | p.P722T                  | c.2164      | 0.403209413 | 4.358 | 1 |

|     |          |                 |                             |             |             |       |   |
|-----|----------|-----------------|-----------------------------|-------------|-------------|-------|---|
| 138 | PLG      | ENST00000308192 | p.E743K                     | c.2227      | 1.47482917  | 0     | 2 |
| 138 | PLG      | ENST00000308192 | p.G747E                     | c.2240      | 0.345906718 | 7.124 | 1 |
| 138 | PLG      | ENST00000308192 | p.L774F                     | c.2322      | 0.04601403  | 7.893 | 1 |
| 138 | PLG      | ENST00000308192 | p.R795H                     | c.2384      | 0.49093529  | 2.564 | 1 |
| 139 | ITGA2B   | ENST00000262407 | p.P653L                     | c.1958      | 0.110261421 | 3.181 | 1 |
| 139 | ITGA2B   | ENST00000262407 | p.P772Q                     | c.2315      | 0.110261421 | 0     | 1 |
| 140 | HSP90AA1 | ENST00000334701 | p.402in_frame_insK          | c.1205_1204 | 0.399189425 | 2.415 | 1 |
| 140 | HSP90AA1 | ENST00000334701 | p.E164D                     | c.492       | 0.082172331 | 8.557 | 1 |
| 140 | HSP90AA1 | ENST00000334701 | p.L167V                     | c.499       | 0.501547593 | 0     | 1 |
| 140 | HSP90AA1 | ENST00000334701 | p.S262F                     | c.785       | 0.069102419 | 5.067 | 1 |
| 140 | HSP90AA1 | ENST00000334701 | p.I325T                     | c.974       | 0.399339901 | 2.374 | 1 |
| 140 | HSP90AA1 | ENST00000334701 | p.E327D                     | c.981       | 0.112364125 | 4.904 | 1 |
| 140 | HSP90AA1 | ENST00000334701 | p.S333F                     | c.998       | 0.097076397 | 4.178 | 1 |
| 141 | H3F3B    | ENST00000587560 | p.D107N                     | c.319       | 0.055706906 | 5.166 | 1 |
| 141 | H3F3A    | ENST00000366813 | p.R130H                     | c.389       | 1.027853453 | 0     | 2 |
| 142 | PIK3R1   | ENST00000274335 | p.L466in_frame_del          | c.1395_1397 | 1.607042583 | 5.78  | 1 |
| 142 | PIK3R1   | ENST00000274335 | p.LYEEY466in_frame_delF     | c.1398_1409 | 1.607042583 | 5.78  | 1 |
| 142 | PIK3R1   | ENST00000274335 | p.I559V                     | c.1675      | 1.283062508 | 9.027 | 1 |
| 142 | PIK3R1   | ENST00000274335 | p.I559T                     | c.1676      | 1.283062508 | 9.027 | 1 |
| 142 | PIK3R1   | ENST00000274335 | p.MNSIKPDL563in_frame_dell  | c.1688_1708 | 1.274656779 | 9.236 | 1 |
| 142 | PIK3R1   | ENST00000274335 | p.NSIKPDLIQL564in_frame_del | c.1688_1717 | 6.043548531 | 0     | 1 |
| 142 | PIK3R1   | ENST00000274335 | p.MN563in_frame_dell        | c.1689_1691 | 1.274656779 | 9.236 | 1 |
| 142 | PIK3R1   | ENST00000274335 | p.N564D                     | c.1690      | 6.043548531 | 0     | 5 |
| 142 | PIK3R1   | ENST00000274335 | p.NSIKP564in_frame_delT     | c.1691_1702 | 6.043548531 | 0     | 1 |
| 143 | IL6ST    | ENST00000381287 | p.K256Q                     | c.766       | 0.110797712 | 4.174 | 1 |
| 143 | IL6ST    | ENST00000381287 | p.S279C                     | c.836       | 1.055398856 | 0     | 1 |
| 143 | IL6ST    | ENST00000381287 | p.S279F                     | c.836       | 1.055398856 | 0     | 1 |
| 144 | RHOA     | ENST00000418115 | p.Y34C                      | c.101       | 0.125588329 | 7.47  | 1 |
| 144 | RHOA     | ENST00000418115 | p.E40Q                      | c.118       | 4.138088136 | 0     | 5 |
| 144 | RHOA     | ENST00000418115 | p.A61V                      | c.182       | 0.231287793 | 4.559 | 1 |
| 144 | RHOA     | ENST00000418115 | p.G62E                      | c.185       | 0.142347866 | 5.261 | 1 |
| 144 | RHOA     | ENST00000418115 | p.Q63K                      | c.187       | 0.420712093 | 3.967 | 1 |
| 145 | PRCP     | ENST00000393399 | p.C385Y                     | c.1154      | 0.110114539 | 4.935 | 1 |
| 145 | PRCP     | ENST00000393399 | p.T386A                     | c.1156      | 0.128818121 | 3.003 | 1 |
| 145 | PRCP     | ENST00000393399 | p.W419C                     | c.1257      | 0.098402638 | 8.739 | 1 |
| 145 | PRCP     | ENST00000393399 | p.R424M                     | c.1271      | 0.159770942 | 0     | 1 |
| 146 | MGAM     | ENST00000475668 | p.D1001N                    | c.3001      | 0.273321184 | 0     | 1 |
| 146 | MGAM     | ENST00000475668 | p.S1004T                    | c.3010      | 0.010943549 | 9.976 | 1 |
| 146 | MGAM     | ENST00000475668 | p.K1022M                    | c.3065      | 0.174083048 | 2.681 | 1 |
| 146 | MGAM     | ENST00000475668 | p.S1023F                    | c.3068      | 0.020854686 | 5.912 | 1 |
| 146 | MGAM     | ENST00000475668 | p.P1091L                    | c.3272      | 0.126955298 | 3.325 | 1 |
| 147 | IL12A    | ENST00000305579 | p.T113P                     | c.337       | 0.022235367 | 5.491 | 1 |
| 147 | IL12A    | ENST00000305579 | p.F172L                     | c.516       | 0.004200429 | 8.546 | 1 |
| 147 | IL12A    | ENST00000305579 | p.R239W                     | c.715       | 0.024910822 | 0     | 1 |
| 148 | SI       | ENST00000264382 | p.P529S                     | c.1585      | 2.024770183 | 0     | 1 |
| 148 | SI       | ENST00000264382 | p.P529L                     | c.1586      | 2.024770183 | 0     | 2 |
| 148 | SI       | ENST00000264382 | p.R91K                      | c.272       | 0.028770162 | 7.105 | 1 |
| 148 | SI       | ENST00000264382 | p.Y226H                     | c.676       | 0.069655791 | 5.836 | 1 |
| 149 | EP300    | ENST00000263253 | p.H1377R                    | c.4130      | 0.260094495 | 6.623 | 1 |

|     |         |                 |          |           |             |       |   |
|-----|---------|-----------------|----------|-----------|-------------|-------|---|
| 149 | EP300   | ENST00000263253 | p.Y1397D | c.4189    | 0.368315975 | 7.472 | 1 |
| 149 | EP300   | ENST00000263253 | p.L1398P | c.4193    | 0.263345414 | 7.076 | 1 |
| 149 | EP300   | ENST00000263253 | p.D1399N | c.4195    | 6.468423377 | 0     | 6 |
| 149 | EP300   | ENST00000263253 | p.D1399Y | c.4195    | 6.468423377 | 0     | 1 |
| 149 | EP300   | ENST00000263253 | p.Y1446C | c.4337    | 1.120758139 | 3.654 | 1 |
| 149 | EP300   | ENST00000263253 | p.H1451P | c.4352    | 2.114327543 | 2.682 | 1 |
| 149 | EP300   | ENST00000263253 | p.H1451R | c.4352    | 2.114327543 | 2.682 | 1 |
| 149 | EP300   | ENST00000263253 | p.Q1455H | c.4365    | 0.209536346 | 5.273 | 1 |
| 149 | EP300   | ENST00000263253 | p.R1627W | c.4879    | 1.481693349 | 6.144 | 2 |
| 150 | THRB    | ENST00000280696 | p.A417V  | c.1250    | 0.11478452  | 3.123 | 1 |
| 150 | THRB    | ENST00000280696 | p.E233G  | c.698     | 0.11478452  | 0     | 1 |
| 151 | CAND1   | ENST00000545606 | p.D344Y  | c.1030    | 0.028183606 | 5.149 | 1 |
| 151 | CAND1   | ENST00000545606 | p.S376P  | c.1126    | 0.008206598 | 6.929 | 1 |
| 151 | CAND1   | ENST00000545606 | p.L302P  | c.905     | 0.036390204 | 0     | 1 |
| 152 | P4HB    | ENST00000331483 | p.S168F  | c.503     | 0.270556161 | 0     | 1 |
| 152 | P4HB    | ENST00000331483 | p.V220A  | c.659     | 0.270556161 | 1.886 | 1 |
| 153 | ITGB4   | ENST00000450894 | p.D1276G | c.3827    | 0.022436633 | 0     | 1 |
| 153 | ITGB4   | ENST00000450894 | p.R1301H | c.3902    | 0.022436633 | 5.478 | 1 |
| 154 | DDAH1   | ENST00000284031 | p.F138L  | c.414     | 0.148960322 | 2.747 | 1 |
| 154 | DDAH1   | ENST00000284031 | p.A162V  | c.485     | 0.148960322 | 0     | 1 |
| 155 | MET     | ENST00000318493 | p.V378I  | c.1132    | 0.015810206 | 6.983 | 1 |
| 155 | MET     | ENST00000318493 | p.R412C  | c.1234    | 1.015931677 | 0     | 1 |
| 155 | MET     | ENST00000318493 | p.R412G  | c.1234    | 1.015931677 | 0     | 1 |
| 155 | MET     | ENST00000318493 | p.L296P  | c.887     | 0.284801037 | 6.961 | 1 |
| 156 | IDH1    | ENST00000415913 | p.E190K  | c.568     | 0.017385158 | 6.846 | 1 |
| 156 | IDH1    | ENST00000415913 | p.Y235N  | c.703     | 1.008692579 | 0     | 1 |
| 156 | IDH1    | ENST00000415913 | p.Y235C  | c.704     | 1.008692579 | 0     | 1 |
| 157 | SH3KBP1 | ENST00000397821 | p.N93I   | c.278     | 0.390624335 | 0     | 1 |
| 157 | SH3KBP1 | ENST00000397821 | p.E130Q  | c.388     | 0.331630253 | 1.71  | 1 |
| 157 | SH3KBP1 | ENST00000397821 | p.G163D  | c.488     | 0.110934448 | 3.557 | 1 |
| 158 | EBF1    | ENST00000313708 | p.R129H  | c.386     | 0.0434952   | 4.523 | 1 |
| 158 | EBF1    | ENST00000313708 | p.N220S  | c.659     | 0.0434952   | 0     | 1 |
| 159 | MLYCD   | ENST00000262430 | p.R455H  | c.1364    | 0.008813923 | 7.826 | 1 |
| 159 | MLYCD   | ENST00000262430 | p.A286V  | c.857     | 1.014254644 | 0     | 2 |
| 159 | MLYCD   | ENST00000262430 | p.V312Y  | c.934_935 | 0.019695365 | 6.666 | 1 |
| 160 | PDE5A   | ENST00000354960 | p.F564C  | c.1691    | 0.360417761 | 3.113 | 1 |
| 160 | PDE5A   | ENST00000354960 | p.R607W  | c.1819    | 0.156911727 | 6.085 | 1 |
| 160 | PDE5A   | ENST00000354960 | p.R777W  | c.2329    | 1.147015864 | 0     | 1 |
| 160 | PDE5A   | ENST00000354960 | p.R777Q  | c.2330    | 1.147015864 | 0     | 1 |
| 160 | PDE5A   | ENST00000354960 | p.I821T  | c.2462    | 0.073368434 | 9.816 | 1 |
| 160 | PDE5A   | ENST00000354960 | p.W853R  | c.2557    | 0.104136943 | 6.003 | 1 |
| 161 | FCER2   | ENST00000597921 | p.R188Q  | c.563     | 0.161656406 | 5.943 | 1 |
| 161 | FCER2   | ENST00000597921 | p.Q207L  | c.620     | 0.335785427 | 4.887 | 1 |
| 161 | FCER2   | ENST00000597921 | p.G218C  | c.652     | 0.248648326 | 2.463 | 1 |
| 161 | FCER2   | ENST00000597921 | p.D227Y  | c.679     | 0.286320907 | 2.946 | 1 |
| 161 | FCER2   | ENST00000597921 | p.N244T  | c.731     | 0.293890549 | 6.735 | 1 |
| 161 | FCER2   | ENST00000597921 | p.R263W  | c.787     | 0.376553497 | 0     | 1 |
| 161 | FCER2   | ENST00000597921 | p.V281M  | c.841     | 0.075790435 | 7.386 | 1 |
| 162 | SIRPG   | ENST00000303415 | p.R221C  | c.661     | 3.04064188  | 0     | 1 |

|     |        |                 |          |        |             |       |    |
|-----|--------|-----------------|----------|--------|-------------|-------|----|
| 162 | SIRPG  | ENST00000303415 | p.R221H  | c.662  | 3.04064188  | 0     | 3  |
| 162 | SIRPG  | ENST00000303415 | p.S222F  | c.665  | 0.066466309 | 9.602 | 1  |
| 162 | SIRPG  | ENST00000303415 | p.A242G  | c.725  | 0.032746405 | 7.711 | 1  |
| 162 | SIRPG  | ENST00000303415 | p.S245F  | c.734  | 0.168842426 | 5.384 | 1  |
| 162 | SIRPG  | ENST00000303415 | p.T307I  | c.920  | 0.067768488 | 6.555 | 1  |
| 163 | GMPS   | ENST00000496455 | p.K535N  | c.1605 | 0.096718261 | 3.465 | 1  |
| 163 | GMPS   | ENST00000496455 | p.P567L  | c.1700 | 0.158574037 | 0     | 1  |
| 163 | GMPS   | ENST00000496455 | p.R677Q  | c.2030 | 0.074174529 | 3.878 | 1  |
| 164 | PIK3CA | ENST00000263967 | p.D538N  | c.1612 | 0.198044788 | 9.221 | 1  |
| 164 | PIK3CA | ENST00000263967 | p.E542K  | c.1624 | 78.03891932 | 0     | 73 |
| 164 | PIK3CA | ENST00000263967 | p.E542Q  | c.1624 | 78.03891932 | 0     | 1  |
| 164 | PIK3CA | ENST00000263967 | p.E542A  | c.1625 | 78.03891932 | 0     | 2  |
| 164 | PIK3CA | ENST00000263967 | p.E542G  | c.1625 | 78.03891932 | 0     | 1  |
| 164 | PIK3CA | ENST00000263967 | p.E542V  | c.1625 | 78.03891932 | 0     | 2  |
| 164 | PIK3CA | ENST00000263967 | p.R992P  | c.2975 | 0.172004598 | 9.836 | 1  |
| 164 | PIK3CA | ENST00000263967 | p.F1016C | c.3047 | 1.067261781 | 6.706 | 1  |
| 164 | PIK3CA | ENST00000263967 | p.D1029H | c.3085 | 2.203357558 | 5.234 | 1  |
| 165 | MCTS1  | ENST00000371315 | p.K48I   | c.143  | 0.009361789 | 6.739 | 1  |
| 165 | MCTS1  | ENST00000371315 | p.V51A   | c.152  | 0.021433333 | 5.544 | 1  |
| 165 | MCTS1  | ENST00000371315 | p.K27N   | c.81   | 0.030795122 | 0     | 1  |
| 166 | DECR1  | ENST00000220764 | p.F43L   | c.129  | 1.021418481 | 0     | 2  |
| 166 | DECR1  | ENST00000220764 | p.M233T  | c.698  | 0.056021584 | 5.545 | 1  |
| 167 | USP13  | ENST00000263966 | p.L220F  | c.658  | 0.235043551 | 2.089 | 1  |
| 167 | USP13  | ENST00000263966 | p.K259E  | c.775  | 0.235043551 | 0     | 1  |
| 168 | ACTN4  | ENST00000252699 | p.L529P  | c.1586 | 0.035599481 | 4.812 | 1  |
| 168 | ACTN4  | ENST00000252699 | p.H591Y  | c.1771 | 0.056533599 | 0     | 1  |
| 168 | ACTN4  | ENST00000252699 | p.T615A  | c.1843 | 0.020934119 | 5.578 | 1  |
| 169 | INPPL1 | ENST00000541756 | p.H359R  | c.1076 | 0.090058109 | 0     | 1  |
| 169 | INPPL1 | ENST00000541756 | p.V485A  | c.1454 | 0.090058109 | 3.473 | 1  |
| 170 | BCAR3  | ENST00000370243 | p.F724S  | c.2171 | 0.002989252 | 8.386 | 1  |
| 170 | BCAR3  | ENST00000370243 | p.E799D  | c.2397 | 0.002989252 | 0     | 1  |
| 171 | IL15   | ENST00000529613 | p.I69N   | c.206  | 0.048194837 | 0     | 1  |
| 171 | IL15   | ENST00000529613 | p.D104E  | c.312  | 0.008032139 | 6.96  | 1  |
| 171 | IL15   | ENST00000529613 | p.I107S  | c.320  | 0.040162698 | 4.638 | 1  |
| 172 | RPL21  | ENST00000326092 | p.K50Q   | c.148  | 0.001605235 | 9.283 | 1  |
| 172 | RPL21  | ENST00000326092 | p.F15L   | c.45   | 0.001605235 | 0     | 1  |
| 173 | PIGR   | ENST00000356495 | p.T147M  | c.440  | 0.083710265 | 6.817 | 1  |
| 173 | PIGR   | ENST00000356495 | p.V206I  | c.616  | 1.008869079 | 0     | 1  |
| 173 | PIGR   | ENST00000356495 | p.V206A  | c.617  | 1.008869079 | 0     | 1  |
| 174 | NONO   | ENST00000276079 | p.R73Q   | c.218  | 0.026334956 | 9.663 | 1  |
| 174 | NONO   | ENST00000276079 | p.R75C   | c.223  | 1.452599203 | 0     | 1  |
| 174 | NONO   | ENST00000276079 | p.R75S   | c.223  | 1.452599203 | 0     | 1  |
| 174 | NONO   | ENST00000276079 | p.M90R   | c.269  | 0.071063899 | 7.57  | 1  |
| 174 | NONO   | ENST00000276079 | p.E102K  | c.304  | 1.144557576 | 3.986 | 2  |
| 174 | NONO   | ENST00000276079 | p.H106Y  | c.316  | 1.03264424  | 6.093 | 2  |
| 174 | NONO   | ENST00000276079 | p.I114L  | c.340  | 0.26562183  | 3.524 | 1  |
| 174 | NONO   | ENST00000276079 | p.R115H  | c.344  | 0.170813034 | 4.006 | 1  |
| 174 | NONO   | ENST00000276079 | p.A144V  | c.431  | 0.334638721 | 2.822 | 1  |
| 175 | CYP2A6 | ENST00000301141 | p.F452L  | c.1356 | 0.247152282 | 3.652 | 1  |

|             |                 |         |        |             |       |   |
|-------------|-----------------|---------|--------|-------------|-------|---|
| 175 CYP2A6  | ENST00000301141 | p.A153V | c.458  | 1.202985374 | 0     | 2 |
| 175 CYP2A6  | ENST00000301141 | p.G154S | c.460  | 0.052682617 | 8.526 | 1 |
| 175 CYP2A6  | ENST00000301141 | p.F155L | c.463  | 0.051805496 | 9.827 | 1 |
| 175 CYP2A6  | ENST00000301141 | p.K194E | c.580  | 0.262478054 | 3.107 | 1 |
| 175 CYP2A6  | ENST00000301141 | p.V306I | c.916  | 0.061100016 | 8.135 | 1 |
| 176 DNMT3L  | ENST00000270172 | p.D239N | c.715  | 1.013683247 | 0     | 2 |
| 176 DNMT3L  | ENST00000270172 | p.L267P | c.800  | 0.021918022 | 8.143 | 1 |
| 176 DNMT3L  | ENST00000270172 | p.N326S | c.977  | 0.041782518 | 6.623 | 1 |
| 177 OPN1SW  | ENST00000249389 | p.G42D  | c.125  | 0.159209684 | 0     | 1 |
| 177 OPN1SW  | ENST00000249389 | p.F92Y  | c.275  | 0.159209684 | 2.651 | 1 |
| 178 C6      | ENST00000263413 | p.R841H | c.2522 | 1.006862738 | 0     | 2 |
| 178 C6      | ENST00000263413 | p.C919F | c.2756 | 0.231213824 | 7.187 | 1 |
| 179 HTR1B   | ENST00000369947 | p.A89T  | c.265  | 0.257675479 | 2.974 | 1 |
| 179 HTR1B   | ENST00000369947 | p.A92S  | c.274  | 1.053092902 | 6.346 | 1 |
| 179 HTR1B   | ENST00000369947 | p.A92V  | c.275  | 1.053092902 | 6.346 | 1 |
| 179 HTR1B   | ENST00000369947 | p.R253Q | c.758  | 1.151859476 | 0     | 2 |
| 180 KLKB1   | ENST00000511608 | p.A613T | c.1837 | 0.151438223 | 3.83  | 1 |
| 180 KLKB1   | ENST00000511608 | p.S643T | c.1927 | 0.383702427 | 0     | 1 |
| 181 MTERFD1 | ENST00000287025 | p.K361N | c.1083 | 0.141209136 | 0     | 1 |
| 181 MTERFD1 | ENST00000287025 | p.V391A | c.1172 | 0.105956862 | 3.294 | 1 |
| 181 MTERFD1 | ENST00000287025 | p.S392Y | c.1175 | 0.043256625 | 4.671 | 1 |
| 182 CYP11B2 | ENST00000323110 | p.R123C | c.367  | 0.007593601 | 7.041 | 1 |
| 182 CYP11B2 | ENST00000323110 | p.A226V | c.677  | 0.021035939 | 5.571 | 1 |
| 182 CYP11B2 | ENST00000323110 | p.T234P | c.700  | 0.023067413 | 5.438 | 1 |
| 182 CYP11B2 | ENST00000323110 | p.L237V | c.709  | 0.00437652  | 7.836 | 1 |
| 182 CYP11B2 | ENST00000323110 | p.W260C | c.780  | 0.056073473 | 0     | 1 |
| 183 CYP11B2 | ENST00000323110 | p.R374W | c.1120 | 0.145782918 | 8.053 | 1 |
| 183 CYP11B2 | ENST00000323110 | p.Y423F | c.1268 | 0.291432864 | 6.736 | 1 |
| 183 CYP11B2 | ENST00000323110 | p.R490T | c.1469 | 0.065854859 | 7.43  | 1 |
| 183 CYP11B2 | ENST00000323110 | p.I192M | c.576  | 0.028596849 | 7.128 | 1 |
| 183 CYP11B2 | ENST00000323110 | p.P322S | c.964  | 3.02609476  | 0     | 2 |
| 183 CYP11B2 | ENST00000323110 | p.P322T | c.964  | 3.02609476  | 0     | 1 |
| 183 CYP11B2 | ENST00000323110 | p.P322L | c.965  | 3.02609476  | 0     | 1 |
| 184 TNFSF14 | ENST00000599359 | p.S103C | c.308  | 0.048092726 | 5.963 | 1 |
| 184 TNFSF14 | ENST00000599359 | p.V147L | c.439  | 0.171566699 | 7.443 | 1 |
| 184 TNFSF14 | ENST00000599359 | p.R223C | c.667  | 2.02177781  | 0     | 3 |
| 185 MMP13   | ENST00000260302 | p.F74V  | c.220  | 0.084027187 | 3.573 | 1 |
| 185 MMP13   | ENST00000260302 | p.P242R | c.725  | 0.084027187 | 0     | 1 |
| 186 GRIA2   | ENST00000296526 | p.I373L | c.1117 | 0.141276026 | 0     | 1 |
| 186 GRIA2   | ENST00000296526 | p.G134R | c.400  | 0.009591685 | 6.704 | 1 |
| 186 GRIA2   | ENST00000296526 | p.A135V | c.404  | 0.075006056 | 3.969 | 1 |
| 186 GRIA2   | ENST00000296526 | p.L240V | c.718  | 0.078975387 | 3.882 | 1 |
| 187 CNTN5   | ENST00000524871 | p.G908E | c.2723 | 0.133986051 | 3.003 | 1 |
| 187 CNTN5   | ENST00000524871 | p.K927R | c.2780 | 0.083365367 | 3.754 | 1 |
| 187 CNTN5   | ENST00000524871 | p.Y953H | c.2857 | 0.198859996 | 0     | 1 |
| 188 GABRB3  | ENST00000541819 | p.R350Q | c.1049 | 2.015100466 | 0     | 1 |
| 188 GABRB3  | ENST00000541819 | p.E133K | c.397  | 0.19043198  | 9.311 | 1 |
| 188 GABRB3  | ENST00000541819 | p.L221F | c.661  | 0.134698809 | 8.47  | 1 |
| 188 GABRB3  | ENST00000541819 | p.R294W | c.880  | 2.015100466 | 0     | 1 |

|     |         |                 |                    |             |             |       |   |
|-----|---------|-----------------|--------------------|-------------|-------------|-------|---|
| 188 | GABRB3  | ENST00000541819 | p.R294L            | c.881       | 2.015100466 | 0     | 1 |
| 188 | GABRB3  | ENST00000541819 | p.Y307C            | c.920       | 0.016833873 | 9.184 | 1 |
| 188 | GABRB3  | ENST00000541819 | p.M308V            | c.922       | 0.039198117 | 6.798 | 1 |
| 189 | DCC     | ENST00000442544 | p.P622Q            | c.1865      | 0.274572673 | 2.329 | 1 |
| 189 | DCC     | ENST00000442544 | p.G653E            | c.1958      | 0.25083231  | 2.48  | 1 |
| 189 | DCC     | ENST00000442544 | p.F654C            | c.1961      | 0.099595052 | 3.925 | 1 |
| 189 | DCC     | ENST00000442544 | p.T656N            | c.1967      | 0.194274997 | 2.894 | 1 |
| 189 | DCC     | ENST00000442544 | p.T700A            | c.2098      | 0.578631511 | 0     | 1 |
| 190 | KMT2C   | ENST00000355193 | p.L378V            | c.1132      | 0.561287249 | 6.812 | 1 |
| 190 | KMT2C   | ENST00000355193 | p.T408M            | c.1223      | 0.485647299 | 4.809 | 1 |
| 190 | KMT2C   | ENST00000355193 | p.C409R            | c.1225      | 0.518264566 | 5.602 | 1 |
| 190 | KMT2C   | ENST00000355193 | p.W430C            | c.1290      | 1.069285801 | 0     | 2 |
| 190 | KMT2C   | ENST00000355193 | p.K431R            | c.1292      | 0.116927955 | 8.641 | 1 |
| 190 | KMT2C   | ENST00000355193 | p.C432R            | c.1294      | 0.138913167 | 9.271 | 1 |
| 191 | FOLH1   | ENST00000256999 | p.R181Q            | c.542       | 0.134340155 | 4.481 | 1 |
| 191 | FOLH1   | ENST00000256999 | p.G206R            | c.616       | 2.044780052 | 0     | 3 |
| 193 | ALDH7A1 | ENST00000409134 | p.G165E            | c.494       | 0.027164175 | 6.469 | 1 |
| 193 | ALDH7A1 | ENST00000409134 | p.I190F            | c.568       | 0.029374303 | 0     | 1 |
| 193 | ALDH7A1 | ENST00000409134 | p.L225F            | c.673       | 0.018085785 | 5.789 | 1 |
| 194 | EGFR    | ENST00000275493 | p.L38V             | c.112       | 0.051085433 | 6.568 | 1 |
| 194 | EGFR    | ENST00000275493 | p.E114K            | c.340       | 2.135812001 | 0     | 3 |
| 194 | EGFR    | ENST00000275493 | p.S116F            | c.347       | 0.060308267 | 9.387 | 1 |
| 194 | EGFR    | ENST00000275493 | p.V148M            | c.442       | 0.190138688 | 9.449 | 1 |
| 194 | EGFR    | ENST00000275493 | p.R149W            | c.445       | 0.457076182 | 3.161 | 1 |
| 194 | EGFR    | ENST00000275493 | p.M178I            | c.534       | 0.266707117 | 6.567 | 1 |
| 195 | NCKAP1  | ENST00000360982 | p.H1031Y           | c.3091      | 0.084486941 | 3.833 | 1 |
| 195 | NCKAP1  | ENST00000360982 | p.M1096V           | c.3286      | 0.104036525 | 0     | 1 |
| 195 | NCKAP1  | ENST00000360982 | p.Y1122H           | c.3364      | 0.036242847 | 4.884 | 1 |
| 196 | GSK3A   | ENST00000222330 | p.E375D            | c.1125      | 0.226520913 | 3.188 | 1 |
| 196 | GSK3A   | ENST00000222330 | p.A378T            | c.1132      | 0.135847208 | 3.957 | 1 |
| 196 | GSK3A   | ENST00000222330 | p.H400L            | c.1199      | 1.174118597 | 0     | 1 |
| 196 | GSK3A   | ENST00000222330 | p.H400Q            | c.1200      | 1.174118597 | 0     | 1 |
| 197 | C1QC    | ENST00000374640 | p.F140L            | c.420       | 0.01612005  | 0     | 1 |
| 197 | C1QC    | ENST00000374640 | p.A172T            | c.514       | 0.01612005  | 5.955 | 1 |
| 198 | TRIM21  | ENST00000254436 | p.R365M            | c.1094      | 0.067870923 | 4.114 | 1 |
| 198 | TRIM21  | ENST00000254436 | p.F420in_frame_del | c.1261_1259 | 0.001301147 | 9.586 | 1 |
| 198 | TRIM21  | ENST00000254436 | p.R443W            | c.1327      | 0.167570087 | 0     | 1 |
| 198 | TRIM21  | ENST00000254436 | p.G333D            | c.998       | 0.116166594 | 3.204 | 1 |
| 199 | MUTYH   | ENST00000450313 | p.R368G            | c.1102      | 0.034445153 | 0     | 1 |
| 199 | MUTYH   | ENST00000450313 | p.R417C            | c.1249      | 0.026718818 | 5.226 | 1 |
| 199 | MUTYH   | ENST00000450313 | p.L451P            | c.1352      | 0.007726335 | 7.016 | 1 |
| 200 | EPHB1   | ENST00000398015 | p.A922T            | c.2764      | 1.012985092 | 0     | 2 |
| 200 | EPHB1   | ENST00000398015 | p.S968I            | c.2903      | 0.028432104 | 6.267 | 1 |
| 201 | ACE     | ENST00000290866 | p.Y656H            | c.1966      | 0.026798366 | 5.857 | 1 |
| 201 | ACE     | ENST00000290866 | p.T697N            | c.2090      | 0.058774539 | 0     | 1 |
| 201 | ACE     | ENST00000290866 | p.D726N            | c.2176      | 0.05106669  | 4.59  | 1 |
| 202 | MYH7    | ENST00000355349 | p.A430T            | c.1288      | 0.010387556 | 6.589 | 1 |
| 202 | MYH7    | ENST00000355349 | p.R434K            | c.1301      | 0.010496121 | 6.574 | 1 |
| 202 | MYH7    | ENST00000355349 | p.V606M            | c.1816      | 0.020883676 | 0     | 1 |

|            |                 |         |        |              |       |   |
|------------|-----------------|---------|--------|--------------|-------|---|
| 203 LMO2   | ENST00000257818 | p.A193V | c.578  | 0.111453299  | 3.196 | 1 |
| 203 LMO2   | ENST00000257818 | p.Q195E | c.583  | 0.023706339  | 5.548 | 1 |
| 203 LMO2   | ENST00000257818 | p.D216N | c.646  | 0.130494938  | 0     | 1 |
| 204 EPHB1  | ENST00000398015 | p.Q715L | c.2144 | 0.001249009  | 9.645 | 1 |
| 204 EPHB1  | ENST00000398015 | p.D848Y | c.2542 | 0.001249009  | 0     | 1 |
| 205 SPTA1  | ENST00000368147 | p.H94Q  | c.282  | 0.076945855  | 5.279 | 1 |
| 205 SPTA1  | ENST00000368147 | p.E149G | c.446  | 1.025755065  | 0     | 1 |
| 205 SPTA1  | ENST00000368147 | p.E149D | c.447  | 1.025755065  | 0     | 1 |
| 206 IKBKB  | ENST00000520810 | p.S476Y | c.1427 | 0.044092805  | 4.899 | 1 |
| 206 IKBKB  | ENST00000520810 | p.R526W | c.1576 | 0.193427193  | 0     | 1 |
| 206 IKBKB  | ENST00000520810 | p.E529K | c.1585 | 0.013591467  | 9.774 | 1 |
| 206 IKBKB  | ENST00000520810 | p.D639N | c.1915 | 0.171284144  | 2.655 | 1 |
| 207 PLEK   | ENST00000234313 | p.R335H | c.1004 | 0.049104532  | 0     | 1 |
| 207 PLEK   | ENST00000234313 | p.E312D | c.936  | 0.049104532  | 4.348 | 1 |
| 208 KIF15  | ENST00000326047 | p.S159N | c.476  | 0.063724855  | 0     | 1 |
| 208 KIF15  | ENST00000326047 | p.E245Q | c.733  | 0.063724855  | 3.972 | 1 |
| 209 DPP3   | ENST00000531863 | p.P413L | c.1238 | 0.088161513  | 0     | 1 |
| 209 DPP3   | ENST00000531863 | p.S317F | c.950  | 0.067742714  | 3.915 | 1 |
| 209 DPP3   | ENST00000531863 | p.R318H | c.953  | 0.023318259  | 5.515 | 1 |
| 210 TF     | ENST00000402696 | p.D77N  | c.229  | 0.380502704  | 2.501 | 1 |
| 210 TF     | ENST00000402696 | p.P98L  | c.293  | 0.044840216  | 6.834 | 1 |
| 210 TF     | ENST00000402696 | p.R132Q | c.395  | 0.184042674  | 3.564 | 1 |
| 210 TF     | ENST00000402696 | p.R273Q | c.818  | 1.271864236  | 0     | 2 |
| 210 TF     | ENST00000402696 | p.E279K | c.835  | 0.052658291  | 9.046 | 1 |
| 211 KYNU   | ENST00000264170 | p.Y448H | c.1342 | 0.073760896  | 0     | 1 |
| 211 KYNU   | ENST00000264170 | p.A30S  | c.88   | 0.073760896  | 3.761 | 1 |
| 212 GZMA   | ENST00000274306 | p.P37H  | c.110  | 0.023308896  | 9.711 | 1 |
| 212 GZMA   | ENST00000274306 | p.H38N  | c.112  | 0.095050438  | 7.143 | 1 |
| 212 GZMA   | ENST00000274306 | p.M43I  | c.129  | 0.360489479  | 3.639 | 1 |
| 212 GZMA   | ENST00000274306 | p.V44F  | c.130  | 0.34727683   | 3.609 | 1 |
| 212 GZMA   | ENST00000274306 | p.I53F  | c.157  | 0.071671774  | 7.649 | 1 |
| 212 GZMA   | ENST00000274306 | p.A55D  | c.164  | 0.111156972  | 7.715 | 1 |
| 212 GZMA   | ENST00000274306 | p.L65F  | c.195  | 0.119143993  | 7.592 | 1 |
| 212 GZMA   | ENST00000274306 | p.L80I  | c.238  | 2.286341026  | 0     | 2 |
| 212 GZMA   | ENST00000274306 | p.L80P  | c.239  | 2.286341026  | 0     | 1 |
| 212 GZMA   | ENST00000274306 | p.L120Q | c.359  | 0.146171368  | 5.075 | 1 |
| 212 GZMA   | ENST00000274306 | p.V130L | c.388  | 0.308583471  | 3.948 | 1 |
| 212 GZMA   | ENST00000274306 | p.D211E | c.633  | 0.208750632  | 7.274 | 1 |
| 213 NOS2   | ENST00000313735 | p.V359M | c.1075 | 0.092141242  | 5.539 | 1 |
| 213 NOS2   | ENST00000313735 | p.Q142E | c.424  | 1.021507744  | 0     | 1 |
| 213 NOS2   | ENST00000313735 | p.Q142L | c.425  | 1.021507744  | 0     | 1 |
| 214 MBTD1  | ENST00000415868 | p.T183A | c.547  | 0.009611651  | 6.701 | 1 |
| 214 MBTD1  | ENST00000415868 | p.W193C | c.579  | 0.088021514  | 3.506 | 1 |
| 214 MBTD1  | ENST00000415868 | p.P245T | c.733  | 0.097633165  | 0     | 1 |
| 215 ACAD11 | ENST00000264990 | p.E644K | c.1930 | 0.004382592  | 7.834 | 1 |
| 215 ACAD11 | ENST00000264990 | p.V722I | c.2164 | 0.004382592  | 0     | 1 |
| 216 CFI    | ENST00000394635 | p.V152M | c.454  | 0.093295903  | 0     | 1 |
| 216 CFI    | ENST00000394635 | p.R187Q | c.560  | 0.0411101024 | 5.854 | 1 |
| 216 CFI    | ENST00000394635 | p.G188E | c.563  | 0.08700631   | 3.749 | 1 |



|             |                 |                    |             |             |       |   |
|-------------|-----------------|--------------------|-------------|-------------|-------|---|
| 216 CFI     | ENST00000394635 | p.D249V            | c.746       | 0.020022264 | 9.261 | 1 |
| 217 STIM1   | ENST00000300737 | p.W350L            | c.1049      | 0.008043282 | 6.958 | 1 |
| 217 STIM1   | ENST00000300737 | p.K408Q            | c.1222      | 0.008043282 | 0     | 1 |
| 218 SCIN    | ENST00000297029 | p.I628F            | c.1882      | 0.145132901 | 0     | 1 |
| 218 SCIN    | ENST00000297029 | p.S670F            | c.2009      | 0.032488503 | 5.091 | 1 |
| 218 SCIN    | ENST00000297029 | p.K672T            | c.2015      | 0.00847248  | 6.883 | 1 |
| 218 SCIN    | ENST00000297029 | p.S673F            | c.2018      | 0.110469441 | 3.22  | 1 |
| 219 ALK     | ENST00000389048 | p.S1324F           | c.3971      | 0.026904662 | 0     | 1 |
| 219 ALK     | ENST00000389048 | p.K1352N           | c.4056      | 0.026904662 | 5.216 | 1 |
| 220 CD4     | ENST00000011653 | p.H52Y             | c.154       | 0.185906638 | 2.632 | 1 |
| 220 CD4     | ENST00000011653 | p.S56F             | c.167       | 0.191581771 | 2.714 | 1 |
| 220 CD4     | ENST00000011653 | p.T106A            | c.316       | 0.315771749 | 0     | 1 |
| 220 CD4     | ENST00000011653 | p.E117in_frame_del | c.344_346   | 0.102933753 | 8.934 | 1 |
| 221 ADAM22  | ENST00000315984 | p.R385I            | c.1154      | 0.181361213 | 3.318 | 1 |
| 221 ADAM22  | ENST00000315984 | p.W558R            | c.1672      | 0.260115895 | 0     | 1 |
| 221 ADAM22  | ENST00000315984 | p.P612L            | c.1834_1835 | 0.173071819 | 3.435 | 1 |
| 221 ADAM22  | ENST00000315984 | p.E616K            | c.1846      | 0.013284446 | 7.351 | 1 |
| 221 ADAM22  | ENST00000315984 | p.G638R            | c.1912      | 0.080221521 | 4.029 | 1 |
| 222 ITGB2   | ENST00000397850 | p.Y137C            | c.410       | 0.156921803 | 5.442 | 1 |
| 222 ITGB2   | ENST00000397850 | p.P192H            | c.575       | 0.108814258 | 8.699 | 1 |
| 222 ITGB2   | ENST00000397850 | p.E234Q            | c.700       | 0.341533914 | 0     | 1 |
| 222 ITGB2   | ENST00000397850 | p.D264Y            | c.790       | 0.053090799 | 5.244 | 1 |
| 222 ITGB2   | ENST00000397850 | p.D265Y            | c.793       | 0.200338375 | 2.589 | 1 |
| 222 ITGB2   | ENST00000397850 | p.D300H            | c.898       | 0.150169012 | 3.017 | 1 |
| 223 ERBB4   | ENST00000342788 | p.E806D            | c.2418      | 0.038394516 | 6.958 | 1 |
| 223 ERBB4   | ENST00000342788 | p.E810K            | c.2428      | 0.134267043 | 4.225 | 1 |
| 223 ERBB4   | ENST00000342788 | p.F916Y            | c.2747      | 0.093013862 | 9.905 | 1 |
| 223 ERBB4   | ENST00000342788 | p.R979G            | c.2935      | 1.062561004 | 0     | 1 |
| 223 ERBB4   | ENST00000342788 | p.R979Q            | c.2936      | 1.062561004 | 0     | 1 |
| 225 F5      | ENST00000367796 | p.T340A            | c.1018      | 0.01407624  | 9.94  | 1 |
| 225 F5      | ENST00000367796 | p.R341C            | c.1021      | 1.087544585 | 0     | 1 |
| 225 F5      | ENST00000367796 | p.R341H            | c.1022      | 1.087544585 | 0     | 1 |
| 225 F5      | ENST00000367796 | p.Y455H            | c.1363      | 0.209688021 | 3.564 | 1 |
| 225 F5      | ENST00000367796 | p.Y483N            | c.1447      | 0.306096247 | 8.985 | 1 |
| 226 PLA2G4A | ENST00000367466 | p.I429T            | c.1286      | 0.081345797 | 0     | 1 |
| 226 PLA2G4A | ENST00000367466 | p.G484V            | c.1451      | 0.073341891 | 4.186 | 1 |
| 226 PLA2G4A | ENST00000367466 | p.H546Y            | c.1636      | 0.052593214 | 5.243 | 1 |
| 227 VPRES1  | ENST00000403807 | p.T42I             | c.125       | 0.041613939 | 7.889 | 1 |
| 227 VPRES1  | ENST00000403807 | p.S53C             | c.157       | 0.218920337 | 0     | 1 |
| 227 VPRES1  | ENST00000403807 | p.S78N             | c.233       | 0.017611296 | 7.213 | 1 |
| 227 VPRES1  | ENST00000403807 | p.M117I            | c.351       | 0.160941867 | 3.148 | 1 |
| 227 VPRES1  | ENST00000403807 | p.A119D            | c.356_357   | 0.077010367 | 4.002 | 1 |
| 227 VPRES1  | ENST00000403807 | p.R120H            | c.359       | 0.043829949 | 4.933 | 1 |
| 228 PGLYRP3 | ENST00000290722 | p.I207T            | c.620       | 0.177971353 | 0     | 1 |
| 228 PGLYRP3 | ENST00000290722 | p.H264Y            | c.790       | 0.091159247 | 3.586 | 1 |
| 228 PGLYRP3 | ENST00000290722 | p.G315S            | c.943       | 0.046310789 | 5.829 | 1 |
| 228 PGLYRP3 | ENST00000290722 | p.P325S            | c.973       | 0.084884039 | 3.697 | 1 |
| 229 FCER1A  | ENST00000368115 | p.E45D             | c.135       | 1.094068557 | 0     | 2 |
| 229 FCER1A  | ENST00000368115 | p.G53E             | c.158       | 0.048099973 | 9.581 | 1 |

|     |          |                 |          |        |             |       |   |
|-----|----------|-----------------|----------|--------|-------------|-------|---|
| 229 | FCER1A   | ENST00000368115 | p.G134C  | c.400  | 1.058598194 | 5.093 | 1 |
| 229 | FCER1A   | ENST00000368115 | p.G134S  | c.400  | 1.058598194 | 5.093 | 1 |
| 229 | FCER1A   | ENST00000368115 | p.R136S  | c.408  | 0.23053433  | 4.997 | 1 |
| 229 | FCER1A   | ENST00000368115 | p.E157K  | c.469  | 0.184753298 | 8.455 | 1 |
| 230 | MYO5A    | ENST00000358212 | p.R1588G | c.4762 | 0.013555292 | 6.205 | 1 |
| 230 | MYO5A    | ENST00000358212 | p.T1607A | c.4819 | 0.020703235 | 5.594 | 1 |
| 230 | MYO5A    | ENST00000358212 | p.S1860F | c.5579 | 0.034258527 | 0     | 1 |
| 231 | SERPINI1 | ENST00000446050 | p.L389I  | c.1165 | 0.349884205 | 0     | 1 |
| 231 | SERPINI1 | ENST00000446050 | p.F48L   | c.144  | 0.144473855 | 4.045 | 1 |
| 231 | SERPINI1 | ENST00000446050 | p.M96I   | c.288  | 0.107031751 | 3.554 | 1 |
| 231 | SERPINI1 | ENST00000446050 | p.M106T  | c.317  | 0.293700409 | 2.57  | 1 |
| 231 | SERPINI1 | ENST00000446050 | p.V184F  | c.550  | 0.137669468 | 5.152 | 1 |
| 231 | SERPINI1 | ENST00000446050 | p.K187N  | c.561  | 0.055386296 | 7.636 | 1 |
| 231 | SERPINI1 | ENST00000446050 | p.I301N  | c.902  | 0.045621392 | 8.584 | 1 |
| 232 | AGO1     | ENST00000373204 | p.G443V  | c.1328 | 0.047450625 | 4.642 | 1 |
| 232 | AGO1     | ENST00000373204 | p.I444T  | c.1331 | 0.130605728 | 3.11  | 1 |
| 232 | AGO1     | ENST00000373204 | p.I446M  | c.1338 | 0.080945138 | 3.859 | 1 |
| 232 | AGO1     | ENST00000373204 | p.M481I  | c.1443 | 0.244953565 | 0     | 1 |
| 232 | AGO1     | ENST00000373204 | p.L563F  | c.1687 | 0.120790246 | 5.744 | 1 |
| 232 | AGO1     | ENST00000373204 | p.R790L  | c.2369 | 0.083512177 | 9.378 | 1 |
| 233 | ERP27    | ENST00000266397 | p.A36V   | c.107  | 0.059250441 | 4.209 | 1 |
| 233 | ERP27    | ENST00000266397 | p.P47S   | c.139  | 0.007905103 | 6.983 | 1 |
| 233 | ERP27    | ENST00000266397 | p.M50V   | c.148  | 0.028365145 | 7.444 | 1 |
| 233 | ERP27    | ENST00000266397 | p.Q80R   | c.239  | 0.067719066 | 0     | 1 |
| 234 | TLR4     | ENST00000355622 | p.S352Y  | c.1055 | 0.08241792  | 3.766 | 1 |
| 234 | TLR4     | ENST00000355622 | p.L353F  | c.1057 | 0.136953919 | 3.044 | 1 |
| 234 | TLR4     | ENST00000355622 | p.S374R  | c.1122 | 0.194750942 | 0     | 1 |
| 235 | IL2      | ENST00000226730 | p.E80G   | c.239  | 0.0434952   | 5.523 | 1 |
| 235 | IL2      | ENST00000226730 | p.V111L  | c.331  | 1.0217476   | 0     | 1 |
| 235 | IL2      | ENST00000226730 | p.V111A  | c.332  | 1.0217476   | 0     | 1 |
| 236 | GRIK1    | ENST00000327783 | p.S545Y  | c.1634 | 0.083331167 | 0     | 1 |
| 236 | GRIK1    | ENST00000327783 | p.G780R  | c.2338 | 0.083331167 | 3.585 | 1 |
| 237 | CASK     | ENST00000318588 | p.R489W  | c.1465 | 0.042955897 | 0     | 1 |
| 237 | CASK     | ENST00000318588 | p.E550K  | c.1648 | 0.042955897 | 4.541 | 1 |
| 238 | SH3GL3   | ENST00000324537 | p.L139I  | c.415  | 0.003988329 | 0     | 1 |
| 238 | SH3GL3   | ENST00000324537 | p.Q236L  | c.707  | 0.003988329 | 7.97  | 1 |
| 239 | PBRM1    | ENST00000296302 | p.R522L  | c.1565 | 0.396447426 | 4.952 | 1 |
| 239 | PBRM1    | ENST00000296302 | p.M523R  | c.1568 | 0.522158612 | 3.27  | 1 |
| 239 | PBRM1    | ENST00000296302 | p.I575N  | c.1724 | 0.078506101 | 7.474 | 1 |
| 239 | PBRM1    | ENST00000296302 | p.Y580C  | c.1739 | 0.089261614 | 7.281 | 1 |
| 239 | PBRM1    | ENST00000296302 | p.E583K  | c.1747 | 0.278465337 | 7.029 | 1 |
| 239 | PBRM1    | ENST00000296302 | p.M586K  | c.1757 | 2.191147673 | 0     | 1 |
| 239 | PBRM1    | ENST00000296302 | p.M586T  | c.1757 | 2.191147673 | 0     | 1 |
| 239 | PBRM1    | ENST00000296302 | p.M586I  | c.1758 | 2.191147673 | 0     | 1 |
| 239 | PBRM1    | ENST00000296302 | p.L618H  | c.1853 | 0.102014558 | 5.015 | 1 |
| 239 | PBRM1    | ENST00000296302 | p.G626V  | c.1877 | 0.181783125 | 7.784 | 1 |
| 240 | MARK2    | ENST00000402010 | p.F194C  | c.581  | 0.007325229 | 7.725 | 1 |
| 240 | MARK2    | ENST00000402010 | p.S197N  | c.590  | 0.006492546 | 7.267 | 1 |
| 240 | MARK2    | ENST00000402010 | p.L206P  | c.617  | 0.002518883 | 8.633 | 1 |

|     |        |                 |          |        |             |       |   |
|-----|--------|-----------------|----------|--------|-------------|-------|---|
| 240 | MARK2  | ENST00000402010 | p.D232N  | c.694  | 0.013737969 | 0     | 1 |
| 241 | DEPDC1 | ENST00000456315 | p.H83R   | c.248  | 0.161768207 | 0     | 1 |
| 241 | DEPDC1 | ENST00000456315 | p.P107L  | c.320  | 0.161768207 | 2.628 | 1 |
| 242 | IL17RA | ENST00000319363 | p.P73L   | c.218  | 0.01552783  | 7.009 | 1 |
| 242 | IL17RA | ENST00000319363 | p.C126S  | c.376  | 0.024348893 | 6.36  | 1 |
| 242 | IL17RA | ENST00000319363 | p.T160A  | c.478  | 1.019938361 | 0     | 1 |
| 242 | IL17RA | ENST00000319363 | p.T160I  | c.479  | 1.019938361 | 0     | 1 |
| 243 | EDA    | ENST00000374552 | p.R357L  | c.1070 | 0.004842608 | 0     | 1 |
| 243 | EDA    | ENST00000374552 | p.E292K  | c.874  | 0.004842608 | 7.69  | 1 |
| 244 | CRYBA4 | ENST00000354760 | p.V150G  | c.449  | 0.05840085  | 4.3   | 1 |
| 244 | CRYBA4 | ENST00000354760 | p.C151Y  | c.452  | 0.093569431 | 3.578 | 1 |
| 244 | CRYBA4 | ENST00000354760 | p.P155S  | c.463  | 0.075627748 | 3.907 | 1 |
| 244 | CRYBA4 | ENST00000354760 | p.S190N  | c.569  | 0.201163861 | 0     | 1 |
| 245 | FLT3   | ENST00000380982 | p.D362N  | c.1084 | 0.047102835 | 5.695 | 1 |
| 245 | FLT3   | ENST00000380982 | p.Y457C  | c.1370 | 0.305975614 | 3.49  | 1 |
| 245 | FLT3   | ENST00000380982 | p.N518D  | c.1552 | 0.134936002 | 6.616 | 1 |
| 245 | FLT3   | ENST00000380982 | p.L520I  | c.1558 | 1.118501514 | 0     | 1 |
| 245 | FLT3   | ENST00000380982 | p.L520V  | c.1558 | 1.118501514 | 0     | 1 |
| 246 | ALDOC  | ENST00000226253 | p.T206K  | c.617  | 0.010991223 | 8.267 | 1 |
| 246 | ALDOC  | ENST00000226253 | p.V209A  | c.626  | 0.002577164 | 9.6   | 1 |
| 246 | ALDOC  | ENST00000226253 | p.E225K  | c.673  | 0.324851626 | 2.765 | 1 |
| 246 | ALDOC  | ENST00000226253 | p.R258H  | c.773  | 0.154494785 | 8.256 | 1 |
| 246 | ALDOC  | ENST00000226253 | p.R259H  | c.776  | 1.157956605 | 0     | 2 |
| 246 | ALDOC  | ENST00000226253 | p.P293L  | c.878  | 0.133861089 | 8.363 | 1 |
| 247 | CFH    | ENST00000367429 | p.S994I  | c.2981 | 0.012577596 | 6.313 | 1 |
| 247 | CFH    | ENST00000367429 | p.E1175D | c.3525 | 0.075580794 | 0     | 1 |
| 247 | CFH    | ENST00000367429 | p.R1203W | c.3607 | 0.016288528 | 5.94  | 1 |
| 247 | CFH    | ENST00000367429 | p.R1206C | c.3616 | 0.016086564 | 5.958 | 1 |
| 247 | CFH    | ENST00000367429 | p.L1207I | c.3619 | 0.030628107 | 5.029 | 1 |
| 248 | VRK2   | ENST00000340157 | p.E73Q   | c.217  | 0.105770179 | 3.318 | 1 |
| 248 | VRK2   | ENST00000340157 | p.P101A  | c.301  | 0.017306282 | 6.404 | 1 |
| 248 | VRK2   | ENST00000340157 | p.D186H  | c.556  | 0.112081395 | 0     | 1 |
| 249 | NXF1   | ENST00000532297 | p.R342C  | c.1024 | 0.018612779 | 5.87  | 1 |
| 249 | NXF1   | ENST00000532297 | p.E210K  | c.628  | 0.105670676 | 0     | 1 |
| 249 | NXF1   | ENST00000532297 | p.P236Q  | c.707  | 0.090086777 | 3.497 | 1 |
| 250 | SKP2   | ENST00000274255 | p.A162S  | c.484  | 0.081086403 | 4.718 | 1 |
| 250 | SKP2   | ENST00000274255 | p.R182C  | c.544  | 1.131096556 | 6.173 | 2 |
| 250 | SKP2   | ENST00000274255 | p.V183I  | c.547  | 1.199779439 | 0     | 1 |
| 250 | SKP2   | ENST00000274255 | p.V183A  | c.548  | 1.199779439 | 0     | 1 |
| 250 | SKP2   | ENST00000274255 | p.S212I  | c.635  | 0.479978944 | 2.899 | 1 |
| 251 | CDKN2C | ENST00000371761 | p.R39T   | c.116  | 0.244876218 | 4.165 | 1 |
| 251 | CDKN2C | ENST00000371761 | p.D64N   | c.190  | 0.050994492 | 6.922 | 1 |
| 251 | CDKN2C | ENST00000371761 | p.K66E   | c.196  | 0.266845778 | 0     | 1 |
| 251 | CDKN2C | ENST00000371761 | p.D67N   | c.199  | 0.20189462  | 6.652 | 1 |
| 251 | CDKN2C | ENST00000371761 | p.E99K   | c.295  | 0.259985969 | 2.374 | 1 |
| 252 | CDK12  | ENST00000447079 | p.G923V  | c.2768 | 0.067868204 | 7.203 | 1 |
| 252 | CDK12  | ENST00000447079 | p.F986S  | c.2957 | 1.006787048 | 0     | 1 |
| 252 | CDK12  | ENST00000447079 | p.F986L  | c.2958 | 1.006787048 | 0     | 1 |
| 253 | IGF2R  | ENST00000356956 | p.E1544G | c.4631 | 0.03530901  | 0     | 1 |

|     |          |                 |          |        |             |       |   |
|-----|----------|-----------------|----------|--------|-------------|-------|---|
| 253 | IGF2R    | ENST00000356956 | p.A1923V | c.5768 | 0.025365299 | 5.301 | 1 |
| 253 | IGF2R    | ENST00000356956 | p.Y1933C | c.5798 | 0.00994371  | 6.652 | 1 |
| 254 | TMPRSS15 | ENST00000284885 | p.P797S  | c.2389 | 0.103639863 | 3.381 | 1 |
| 254 | TMPRSS15 | ENST00000284885 | p.L843Q  | c.2528 | 0.033052209 | 5.299 | 1 |
| 254 | TMPRSS15 | ENST00000284885 | p.Y891C  | c.2672 | 0.121388629 | 0     | 1 |
| 255 | BCKDHB   | ENST00000356489 | p.S358L  | c.1073 | 0.019157697 | 0     | 1 |
| 255 | BCKDHB   | ENST00000356489 | p.K381Q  | c.1141 | 0.009485898 | 6.72  | 1 |
| 255 | BCKDHB   | ENST00000356489 | p.R324Q  | c.971  | 0.009671799 | 6.692 | 1 |
| 256 | INHBA    | ENST00000442711 | p.C350R  | c.1048 | 0.120103478 | 6.389 | 1 |
| 256 | INHBA    | ENST00000442711 | p.K395R  | c.1184 | 0.318511109 | 2.5   | 1 |
| 256 | INHBA    | ENST00000442711 | p.N417S  | c.1250 | 0.037753242 | 7.972 | 1 |
| 256 | INHBA    | ENST00000442711 | p.V420M  | c.1258 | 0.204155098 | 6.007 | 1 |
| 256 | INHBA    | ENST00000442711 | p.E421K  | c.1261 | 0.328732263 | 0     | 1 |
| 256 | INHBA    | ENST00000442711 | p.G311D  | c.932  | 0.145102551 | 3.053 | 1 |
| 257 | GRM1     | ENST00000282753 | p.F354L  | c.1062 | 0.057437484 | 6.43  | 1 |
| 257 | GRM1     | ENST00000282753 | p.K409M  | c.1226 | 0.085949667 | 3.557 | 1 |
| 257 | GRM1     | ENST00000282753 | p.R78S   | c.234  | 0.096562106 | 0     | 1 |
| 258 | NFKBIA   | ENST00000216797 | p.Q249H  | c.747  | 0.003809982 | 8.036 | 1 |
| 258 | NFKBIA   | ENST00000216797 | p.S293T  | c.877  | 0.003809982 | 0     | 1 |
| 259 | TEK      | ENST00000380036 | p.R915C  | c.2743 | 0.0336132   | 8.87  | 1 |
| 259 | TEK      | ENST00000380036 | p.R1003C | c.3007 | 0.182251378 | 0     | 1 |
| 259 | TEK      | ENST00000380036 | p.P1038S | c.3112 | 0.177091565 | 2.692 | 1 |
| 259 | TEK      | ENST00000380036 | p.D1117H | c.3349 | 0.05156125  | 5.301 | 1 |
| 260 | MSH6     | ENST00000234420 | p.A1206E | c.3617 | 0.011351289 | 6.461 | 1 |
| 260 | MSH6     | ENST00000234420 | p.T1238A | c.3712 | 0.011351289 | 0     | 1 |
| 261 | GPI      | ENST00000588991 | p.Y378H  | c.1132 | 0.144219037 | 0     | 1 |
| 261 | GPI      | ENST00000588991 | p.H411Y  | c.1231 | 0.035045848 | 5.634 | 1 |
| 261 | GPI      | ENST00000588991 | p.Q412H  | c.1236 | 0.118977697 | 3.1   | 1 |
| 261 | GPI      | ENST00000588991 | p.A17T   | c.49   | 0.025501024 | 7.068 | 1 |
| 262 | TBK1     | ENST00000331710 | p.P90S   | c.268  | 0.035896824 | 5.8   | 1 |
| 262 | TBK1     | ENST00000331710 | p.R25C   | c.73   | 1.017948412 | 0     | 2 |
| 263 | UPF1     | ENST00000599848 | p.A382V  | c.1145 | 0.035540664 | 5.3   | 1 |
| 263 | UPF1     | ENST00000599848 | p.R473C  | c.1417 | 0.142604121 | 3.028 | 1 |
| 263 | UPF1     | ENST00000599848 | p.S774F  | c.2321 | 0.107727579 | 7.124 | 1 |
| 263 | UPF1     | ENST00000599848 | p.R811H  | c.2432 | 0.14258504  | 9.049 | 1 |
| 263 | UPF1     | ENST00000599848 | p.L814M  | c.2440 | 0.157037227 | 0     | 1 |
| 264 | PAPSS1   | ENST00000265174 | p.R397C  | c.1189 | 0.027015725 | 8.497 | 1 |
| 264 | PAPSS1   | ENST00000265174 | p.H452L  | c.1355 | 0.281856156 | 0     | 1 |
| 264 | PAPSS1   | ENST00000265174 | p.A489T  | c.1465 | 0.157225313 | 3.131 | 1 |
| 264 | PAPSS1   | ENST00000265174 | p.R510W  | c.1528 | 0.183766181 | 2.6   | 1 |
| 265 | CASP1    | ENST00000598974 | p.M386I  | c.1158 | 0.034267862 | 0     | 1 |
| 265 | CASP1    | ENST00000598974 | p.C331W  | c.993  | 0.034267862 | 4.867 | 1 |
| 266 | AIMP1    | ENST00000442366 | p.G182R  | c.544  | 0.084846561 | 3.559 | 1 |
| 266 | AIMP1    | ENST00000442366 | p.P247S  | c.739  | 0.084846561 | 0     | 1 |
| 267 | F13A1    | ENST00000264870 | p.D358Y  | c.1072 | 0.201749741 | 7.834 | 1 |
| 267 | F13A1    | ENST00000264870 | p.T67N   | c.200  | 0.074793582 | 7.654 | 1 |
| 267 | F13A1    | ENST00000264870 | p.R78C   | c.232  | 1.430076127 | 0     | 1 |
| 267 | F13A1    | ENST00000264870 | p.R78L   | c.233  | 1.430076127 | 0     | 1 |
| 267 | F13A1    | ENST00000264870 | p.R79K   | c.236  | 0.299436946 | 6.162 | 1 |

|              |                 |          |           |             |       |   |
|--------------|-----------------|----------|-----------|-------------|-------|---|
| 267 F13A1    | ENST00000264870 | p.R108C  | c.322     | 0.299268164 | 7.478 | 1 |
| 267 F13A1    | ENST00000264870 | p.R144W  | c.430     | 1.110368074 | 8.819 | 1 |
| 267 F13A1    | ENST00000264870 | p.R144Q  | c.431     | 1.110368074 | 8.819 | 1 |
| 267 F13A1    | ENST00000264870 | p.S150F  | c.449     | 0.420027768 | 2.773 | 1 |
| 267 F13A1    | ENST00000264870 | p.L184F  | c.550     | 0.651275266 | 3.268 | 1 |
| 267 F13A1    | ENST00000264870 | p.P187S  | c.559     | 0.374782983 | 3.98  | 1 |
| 267 F13A1    | ENST00000264870 | p.A269V  | c.806     | 0.125197868 | 8.124 | 1 |
| 267 F13A1    | ENST00000264870 | p.G330K  | c.989_988 | 0.425802315 | 3.65  | 1 |
| 268 CASQ1    | ENST00000368078 | p.L170P  | c.509     | 0.022742745 | 6.389 | 1 |
| 268 CASQ1    | ENST00000368078 | p.A172V  | c.515     | 0.135526998 | 3.164 | 1 |
| 268 CASQ1    | ENST00000368078 | p.E174Q  | c.520     | 0.020333106 | 6.564 | 1 |
| 268 CASQ1    | ENST00000368078 | p.P209T  | c.625     | 0.018289745 | 7.045 | 1 |
| 268 CASQ1    | ENST00000368078 | p.D293N  | c.877     | 0.046492928 | 8.707 | 1 |
| 268 CASQ1    | ENST00000368078 | p.P294F  | c.880_881 | 0.144035183 | 0     | 1 |
| 269 AKR1B10  | ENST00000359579 | p.S163R  | c.489     | 0.05230164  | 0     | 1 |
| 269 AKR1B10  | ENST00000359579 | p.L196R  | c.587     | 0.05230164  | 4.257 | 1 |
| 270 DCC      | ENST00000442544 | p.Q559K  | c.1675    | 0.664106033 | 2.246 | 1 |
| 270 DCC      | ENST00000442544 | p.N602S  | c.1805    | 0.344728235 | 4.29  | 1 |
| 270 DCC      | ENST00000442544 | p.R603C  | c.1807    | 1.261926656 | 0     | 2 |
| 271 SERPINB3 | ENST00000283752 | p.H367D  | c.1099    | 0.338091088 | 3.573 | 1 |
| 271 SERPINB3 | ENST00000283752 | p.L57P   | c.170     | 0.105366503 | 6.973 | 1 |
| 271 SERPINB3 | ENST00000283752 | p.F200L  | c.600     | 0.352225726 | 6.639 | 1 |
| 271 SERPINB3 | ENST00000283752 | p.M212I  | c.636     | 0.196743194 | 9.874 | 1 |
| 271 SERPINB3 | ENST00000283752 | p.E250K  | c.748     | 1.104067312 | 0     | 2 |
| 271 SERPINB3 | ENST00000283752 | p.L254F  | c.760     | 0.035911179 | 9.994 | 1 |
| 272 NTRK3    | ENST00000360948 | p.G356R  | c.1066    | 1.022949256 | 0     | 1 |
| 272 NTRK3    | ENST00000360948 | p.G356E  | c.1067    | 1.022949256 | 0     | 1 |
| 272 NTRK3    | ENST00000360948 | p.E357D  | c.1071    | 0.130175251 | 8.948 | 1 |
| 272 NTRK3    | ENST00000360948 | p.R326L  | c.977     | 0.185711615 | 5.918 | 1 |
| 272 NTRK3    | ENST00000360948 | p.T332M  | c.995     | 0.015381875 | 7.833 | 1 |
| 273 AOC1     | ENST00000416793 | p.S351I  | c.1052    | 0.02066821  | 6.337 | 1 |
| 273 AOC1     | ENST00000416793 | p.D466N  | c.1396    | 0.007139308 | 7.13  | 1 |
| 273 AOC1     | ENST00000416793 | p.M475I  | c.1425    | 0.06482183  | 4.145 | 1 |
| 273 AOC1     | ENST00000416793 | p.F713Y  | c.2138    | 0.076033111 | 0     | 1 |
| 274 ADH1B    | ENST00000305046 | p.G78R   | c.232     | 0.0217338   | 5.78  | 1 |
| 274 ADH1B    | ENST00000305046 | p.P92S   | c.274     | 0.176856096 | 5.732 | 1 |
| 274 ADH1B    | ENST00000305046 | p.L124P  | c.371     | 0.087506771 | 3.723 | 1 |
| 274 ADH1B    | ENST00000305046 | p.Q125K  | c.373     | 0.133180384 | 3.077 | 1 |
| 274 ADH1B    | ENST00000305046 | p.R130S  | c.390     | 0.022572164 | 6.492 | 1 |
| 274 ADH1B    | ENST00000305046 | p.D154Y  | c.460     | 0.244558454 | 0     | 1 |
| 274 ADH1B    | ENST00000305046 | p.K324R  | c.971     | 0.122591307 | 8.827 | 1 |
| 275 ECHS1    | ENST00000368547 | p.E77K   | c.229     | 0.009381277 | 7.736 | 1 |
| 275 ECHS1    | ENST00000368547 | p.A238E  | c.713     | 1.004690638 | 0     | 1 |
| 275 ECHS1    | ENST00000368547 | p.A238V  | c.713     | 1.004690638 | 0     | 1 |
| 276 AKR1C2   | ENST00000380753 | p.H194D  | c.580     | 0.028596849 | 5.128 | 1 |
| 276 AKR1C2   | ENST00000380753 | p.R304Q  | c.911     | 0.028596849 | 0     | 1 |
| 277 SACS     | ENST00000382292 | p.F4458L | c.13374   | 0.009080579 | 6.783 | 1 |
| 277 SACS     | ENST00000382292 | p.L4479I | c.13435   | 0.082688253 | 0     | 1 |
| 277 SACS     | ENST00000382292 | p.Y4538H | c.13612   | 0.073607674 | 3.764 | 1 |

|             |                 |                    |           |             |       |   |
|-------------|-----------------|--------------------|-----------|-------------|-------|---|
| 278 NAALAD2 | ENST00000534061 | p.G519E            | c.1556    | 0.016538819 | 5.918 | 1 |
| 278 NAALAD2 | ENST00000534061 | p.A664T            | c.1990    | 0.016538819 | 0     | 1 |
| 279 NR3C1   | ENST00000231509 | p.M605I            | c.1815    | 0.13741267  | 9.728 | 1 |
| 279 NR3C1   | ENST00000231509 | p.T669P            | c.2005    | 0.133281622 | 6.392 | 1 |
| 279 NR3C1   | ENST00000231509 | p.S725Y            | c.2174    | 1.023260344 | 0     | 2 |
| 279 NR3C1   | ENST00000231509 | p.L773P            | c.2318    | 0.040101127 | 6.619 | 1 |
| 280 ATP7B   | ENST00000242839 | p.T1092M           | c.3275    | 0.20661258  | 2.275 | 1 |
| 280 ATP7B   | ENST00000242839 | p.P1119H           | c.3356    | 0.20661258  | 0     | 1 |
| 281 ECE1    | ENST00000374893 | p.F237in_frame_del | c.712_710 | 0.01127288  | 6.471 | 1 |
| 281 ECE1    | ENST00000374893 | p.L314P            | c.941     | 0.01127288  | 0     | 1 |
| 282 GAD1    | ENST00000358196 | p.R134C            | c.400     | 1.076181515 | 0     | 2 |
| 282 GAD1    | ENST00000358196 | p.V138L            | c.412     | 0.284731153 | 7.816 | 1 |
| 282 GAD1    | ENST00000358196 | p.R186Q            | c.557     | 0.218578148 | 3.801 | 1 |
| 283 PPARD   | ENST00000360694 | p.Y108C            | c.323     | 0.018517075 | 0     | 1 |
| 283 PPARD   | ENST00000360694 | p.R129H            | c.386     | 0.018517075 | 5.755 | 1 |
| 284 ADH4    | ENST00000508393 | p.D368V            | c.1103    | 0.081005455 | 3.652 | 1 |
| 284 ADH4    | ENST00000508393 | p.A62D             | c.185     | 0.019755931 | 5.772 | 1 |
| 284 ADH4    | ENST00000508393 | p.R193K            | c.578     | 0.097849843 | 0     | 1 |
| 285 CAMK1   | ENST00000256460 | p.G214S            | c.640     | 0.119493165 | 0     | 1 |
| 285 CAMK1   | ENST00000256460 | p.Q293H            | c.879     | 0.119493165 | 3.065 | 1 |
| 286 ATAD2B  | ENST00000238789 | p.R347I            | c.1040    | 0.081265962 | 4.291 | 1 |
| 286 ATAD2B  | ENST00000238789 | p.R355G            | c.1063    | 0.051204585 | 6.565 | 1 |
| 286 ATAD2B  | ENST00000238789 | p.G247R            | c.739     | 0.193130679 | 2.872 | 1 |
| 286 ATAD2B  | ENST00000238789 | p.D293V            | c.878     | 0.074046317 | 8.306 | 1 |
| 286 ATAD2B  | ENST00000238789 | p.R294Q            | c.881     | 0.204814566 | 0     | 1 |
| 286 ATAD2B  | ENST00000238789 | p.P299S            | c.895     | 0.043043375 | 8.195 | 1 |
| 287 FAP     | ENST00000188790 | p.I47N             | c.140     | 0.014947002 | 7.064 | 1 |
| 287 FAP     | ENST00000188790 | p.W623S            | c.1868    | 0.090234501 | 6.111 | 1 |
| 287 FAP     | ENST00000188790 | p.T741K            | c.2222    | 1.021941408 | 0     | 2 |
| 288 PGD     | ENST00000270776 | p.F123V            | c.367     | 0.007124478 | 7.133 | 1 |
| 288 PGD     | ENST00000270776 | p.E148Q            | c.442     | 0.007124478 | 0     | 1 |
| 289 ACAT1   | ENST00000265838 | p.V45L             | c.133     | 0.038181034 | 0     | 1 |
| 289 ACAT1   | ENST00000265838 | p.A301V            | c.902     | 0.038181034 | 4.711 | 1 |
| 290 SENP1   | ENST00000549518 | p.F519L            | c.1557    | 0.077428044 | 0     | 1 |
| 290 SENP1   | ENST00000549518 | p.F579S            | c.1736    | 0.077428044 | 3.691 | 1 |
| 291 FGA     | ENST00000302053 | p.L728S            | c.2183    | 0.329857548 | 3.905 | 1 |
| 291 FGA     | ENST00000302053 | p.A762V            | c.2285    | 0.389918906 | 7.67  | 1 |
| 291 FGA     | ENST00000302053 | p.A855D            | c.2564    | 2.073435567 | 0     | 2 |
| 291 FGA     | ENST00000302053 | p.A855V            | c.2564    | 2.073435567 | 0     | 1 |
| 291 FGA     | ENST00000302053 | p.R857C            | c.2569    | 0.03379984  | 9.141 | 1 |
| 292 DOCK2   | ENST00000256935 | p.D1519N           | c.4555    | 0.0795739   | 9.632 | 1 |
| 292 DOCK2   | ENST00000256935 | p.L1527H           | c.4580    | 1.113048481 | 0     | 2 |
| 292 DOCK2   | ENST00000256935 | p.L1531P           | c.4592    | 0.102622704 | 7.958 | 1 |
| 292 DOCK2   | ENST00000256935 | p.F1579L           | c.4737    | 0.066314916 | 7.845 | 1 |
| 292 DOCK2   | ENST00000256935 | p.H1587N           | c.4759    | 0.197759788 | 3.88  | 1 |
| 292 DOCK2   | ENST00000256935 | p.E1588K           | c.4762    | 0.034722593 | 6.248 | 1 |
| 292 DOCK2   | ENST00000256935 | p.R1590G           | c.4768    | 0.116810127 | 5.934 | 1 |
| 292 DOCK2   | ENST00000256935 | p.V1591E           | c.4772    | 0.011965297 | 7.385 | 1 |
| 293 PLAU    | ENST00000372764 | p.M334I            | c.1002    | 0.199732399 | 4.119 | 1 |

|     |        |                 |                    |           |             |       |   |
|-----|--------|-----------------|--------------------|-----------|-------------|-------|---|
| 293 | PLAU   | ENST00000372764 | p.I340M            | c.1020    | 0.34789413  | 7.198 | 1 |
| 293 | PLAU   | ENST00000372764 | p.A362V            | c.1085    | 0.639408576 | 4.713 | 1 |
| 293 | PLAU   | ENST00000372764 | p.D364G            | c.1091    | 0.402111106 | 6.014 | 1 |
| 293 | PLAU   | ENST00000372764 | p.V408I            | c.1222    | 1.183025852 | 8.137 | 2 |
| 293 | PLAU   | ENST00000372764 | p.R411T            | c.1232    | 0.205447117 | 9.028 | 1 |
| 293 | PLAU   | ENST00000372764 | p.P417L            | c.1250    | 0.174223116 | 8.142 | 1 |
| 293 | PLAU   | ENST00000372764 | p.P216R            | c.647     | 0.595741584 | 1.884 | 1 |
| 293 | PLAU   | ENST00000372764 | p.R282L            | c.845     | 0.213177054 | 7.472 | 1 |
| 293 | PLAU   | ENST00000372764 | p.A289V            | c.866     | 1.408363284 | 0     | 2 |
| 293 | PLAU   | ENST00000372764 | p.K333N            | c.999     | 0.094428326 | 9.616 | 1 |
| 294 | GRIK2  | ENST00000421544 | p.V514F            | c.1540    | 1.019981106 | 0     | 2 |
| 294 | GRIK2  | ENST00000421544 | p.F533V            | c.1597    | 0.095229712 | 9.295 | 1 |
| 294 | GRIK2  | ENST00000421544 | p.G765A            | c.2294    | 0.186609031 | 5.765 | 1 |
| 295 | ITK    | ENST00000422843 | p.E362K            | c.1084    | 0.063980755 | 4.367 | 1 |
| 295 | ITK    | ENST00000422843 | p.K385E            | c.1153    | 0.069107988 | 0     | 1 |
| 295 | ITK    | ENST00000422843 | p.L460Q            | c.1379    | 0.021646456 | 5.598 | 1 |
| 296 | EPHA5  | ENST00000273854 | p.M868I            | c.2604    | 0.072242919 | 3.791 | 1 |
| 296 | EPHA5  | ENST00000273854 | p.M911I            | c.2733    | 0.072242919 | 0     | 1 |
| 297 | PPARG  | ENST00000287820 | p.G372S            | c.1114    | 1.113665294 | 0     | 2 |
| 297 | PPARG  | ENST00000287820 | p.E397G            | c.1190    | 0.082076425 | 9.818 | 1 |
| 297 | PPARG  | ENST00000287820 | p.K432T            | c.1295    | 0.02131481  | 6.552 | 1 |
| 297 | PPARG  | ENST00000287820 | p.T468A            | c.1402    | 0.11333255  | 8.391 | 1 |
| 297 | PPARG  | ENST00000287820 | p.D228Y            | c.682     | 0.045925025 | 5.476 | 1 |
| 297 | PPARG  | ENST00000287820 | p.I277N            | c.830     | 0.144572507 | 5.925 | 1 |
| 297 | PPARG  | ENST00000287820 | p.I290M            | c.870     | 0.331471133 | 4.505 | 1 |
| 297 | PPARG  | ENST00000287820 | p.R316C            | c.946     | 0.263360042 | 5.97  | 1 |
| 298 | CDKN2A | ENST00000361570 | p.D109H            | c.325     | 0.843299045 | 9.633 | 1 |
| 298 | CDKN2A | ENST00000361570 | p.D109in_frame_del | c.328_326 | 2.182287415 | 4.832 | 1 |
| 298 | CDKN2A | ENST00000361570 | p.A138V            | c.413     | 9.313584339 | 0     | 4 |
| 298 | CDKN2A | ENST00000361570 | p.R139G            | c.415     | 9.313584339 | 0     | 1 |
| 298 | CDKN2A | ENST00000361570 | p.R139Q            | c.416     | 3.524810784 | 6.472 | 2 |
| 298 | CDKN2A | ENST00000361570 | p.G143K            | c.428_427 | 1.874759582 | 6.756 | 2 |
| 298 | CDKN2A | ENST00000361570 | p.R163Q            | c.488     | 8.29796535  | 2.061 | 2 |
| 298 | CDKN2A | ENST00000361570 | p.R163L            | c.488     | 8.29796535  | 2.061 | 3 |
| 298 | CDKN2A | ENST00000361570 | p.G173A            | c.518     | 0.132377231 | 9.933 | 1 |
| 299 | RUNX1  | ENST00000300305 | p.P113S            | c.337     | 1.99354314  | 2.421 | 1 |
| 299 | RUNX1  | ENST00000300305 | p.P113L            | c.338     | 1.99354314  | 2.421 | 1 |
| 299 | RUNX1  | ENST00000300305 | p.V118A            | c.353     | 0.10171235  | 9.321 | 1 |
| 299 | RUNX1  | ENST00000300305 | p.A134P            | c.400     | 0.095722634 | 7.278 | 1 |
| 299 | RUNX1  | ENST00000300305 | p.D160G            | c.479     | 0.109494128 | 7.171 | 1 |
| 299 | RUNX1  | ENST00000300305 | p.L161P            | c.482     | 0.607115261 | 4.747 | 1 |
| 299 | RUNX1  | ENST00000300305 | p.R162G            | c.484     | 3.425639453 | 0     | 2 |
| 299 | RUNX1  | ENST00000300305 | p.R162K            | c.485     | 3.425639453 | 0     | 1 |
| 299 | RUNX1  | ENST00000300305 | p.R162S            | c.486     | 3.425639453 | 0     | 1 |
| 300 | QPCT   | ENST00000338415 | p.D340N            | c.1018    | 0.057209292 | 4.68  | 1 |
| 300 | QPCT   | ENST00000338415 | p.W66L             | c.197     | 0.05955631  | 0     | 1 |
| 300 | QPCT   | ENST00000338415 | p.V162M            | c.484     | 0.020545981 | 5.605 | 1 |
| 301 | UBE2V1 | ENST00000371677 | p.P103T            | c.307     | 0.023421948 | 5.724 | 1 |
| 301 | UBE2V1 | ENST00000371677 | p.F104V            | c.310     | 0.006412044 | 7.285 | 1 |

|     |        |                 |          |        |             |       |   |
|-----|--------|-----------------|----------|--------|-------------|-------|---|
| 301 | UBE2V1 | ENST00000371677 | p.S137L  | c.410  | 0.025331311 | 0     | 1 |
| 302 | MGAM   | ENST00000475668 | p.L372F  | c.1114 | 0.250779371 | 6.614 | 1 |
| 302 | MGAM   | ENST00000475668 | p.Y375N  | c.1123 | 0.503411807 | 3.244 | 1 |
| 302 | MGAM   | ENST00000475668 | p.R606T  | c.1817 | 0.428704499 | 5.378 | 1 |
| 302 | MGAM   | ENST00000475668 | p.Y722H  | c.2164 | 0.030367507 | 9.442 | 1 |
| 302 | MGAM   | ENST00000475668 | p.R834Q  | c.2501 | 3.283839388 | 0     | 4 |
| 302 | MGAM   | ENST00000475668 | p.D857N  | c.2569 | 0.827345731 | 2.81  | 1 |
| 303 | ITGA4  | ENST00000397033 | p.S426L  | c.1277 | 1.157495617 | 0     | 2 |
| 303 | ITGA4  | ENST00000397033 | p.S428T  | c.1283 | 0.285586307 | 6.57  | 1 |
| 303 | ITGA4  | ENST00000397033 | p.R454W  | c.1360 | 0.182969699 | 5.78  | 1 |
| 303 | ITGA4  | ENST00000397033 | p.S455Y  | c.1364 | 0.327963835 | 3.238 | 1 |
| 303 | ITGA4  | ENST00000397033 | p.S457P  | c.1369 | 0.076065071 | 5.456 | 1 |
| 304 | CTNND1 | ENST00000428599 | p.R510W  | c.1528 | 1.015444428 | 0     | 2 |
| 304 | CTNND1 | ENST00000428599 | p.C551Y  | c.1652 | 0.027724425 | 6.822 | 1 |
| 304 | CTNND1 | ENST00000428599 | p.P641S  | c.1921 | 0.013212067 | 7.242 | 1 |
| 305 | PHYH   | ENST00000263038 | p.I199M  | c.597  | 0.042866665 | 4.544 | 1 |
| 305 | PHYH   | ENST00000263038 | p.A277T  | c.829  | 0.042866665 | 0     | 1 |
| 306 | CYP2C9 | ENST00000260682 | p.L458V  | c.1372 | 0.010308656 | 0     | 1 |
| 306 | CYP2C9 | ENST00000260682 | p.P317Q  | c.950  | 0.010308656 | 6.6   | 1 |
| 307 | MMP13  | ENST00000260302 | p.T154N  | c.461  | 0.123040993 | 6.346 | 1 |
| 307 | MMP13  | ENST00000260302 | p.G225D  | c.674  | 1.012293163 | 0     | 1 |
| 307 | MMP13  | ENST00000260302 | p.G225V  | c.674  | 1.012293163 | 0     | 1 |
| 308 | TRPV4  | ENST00000261740 | p.S290L  | c.869  | 1.022005379 | 0     | 2 |
| 308 | TRPV4  | ENST00000261740 | p.R316C  | c.946  | 0.058670463 | 5.506 | 1 |
| 309 | ACTN2  | ENST00000542672 | p.K409R  | c.1226 | 0.229943763 | 4.016 | 1 |
| 309 | ACTN2  | ENST00000542672 | p.T412M  | c.1235 | 0.21799774  | 3.812 | 1 |
| 309 | ACTN2  | ENST00000542672 | p.R457C  | c.1369 | 2.147682775 | 0     | 1 |
| 309 | ACTN2  | ENST00000542672 | p.R457H  | c.1370 | 2.147682775 | 0     | 2 |
| 309 | ACTN2  | ENST00000542672 | p.W490C  | c.1470 | 0.058912506 | 6.206 | 1 |
| 309 | ACTN2  | ENST00000542672 | p.M542I  | c.1626 | 0.179072521 | 9.793 | 1 |
| 310 | ZAP70  | ENST00000264972 | p.N395K  | c.1185 | 0.055168937 | 4.18  | 1 |
| 310 | ZAP70  | ENST00000264972 | p.M447T  | c.1340 | 0.055168937 | 0     | 1 |
| 311 | ALB    | ENST00000295897 | p.F43V   | c.127  | 0.017050998 | 0     | 1 |
| 311 | ALB    | ENST00000295897 | p.L179F  | c.535  | 0.017050998 | 5.874 | 1 |
| 312 | PAH    | ENST00000553106 | p.R158Q  | c.473  | 0.237576593 | 0     | 1 |
| 312 | PAH    | ENST00000553106 | p.G247S  | c.739  | 0.100253317 | 3.713 | 1 |
| 312 | PAH    | ENST00000553106 | p.E280K  | c.838  | 0.185317347 | 2.632 | 1 |
| 313 | DICER1 | ENST00000343455 | p.H1755N | c.5263 | 0.01135916  | 6.46  | 1 |
| 313 | DICER1 | ENST00000343455 | p.E1796K | c.5386 | 0.01135916  | 0     | 1 |
| 314 | SYK    | ENST00000375754 | p.R45H   | c.134  | 0.011533706 | 0     | 1 |
| 314 | SYK    | ENST00000375754 | p.R627H  | c.1880 | 0.011533706 | 6.438 | 1 |
| 315 | CTSA   | ENST00000372484 | p.Q398H  | c.1194 | 0.140925052 | 0     | 1 |
| 315 | CTSA   | ENST00000372484 | p.P203S  | c.607  | 0.075427493 | 3.827 | 1 |
| 315 | CTSA   | ENST00000372484 | p.V207M  | c.619  | 0.075427493 | 3.827 | 1 |
| 316 | HCK    | ENST00000375852 | p.S138Y  | c.413  | 0.028399316 | 0     | 1 |
| 316 | HCK    | ENST00000375852 | p.S181F  | c.542  | 0.028399316 | 5.138 | 1 |
| 317 | NGF    | ENST00000369512 | p.K153R  | c.458  | 0.106369782 | 0     | 1 |
| 317 | NGF    | ENST00000369512 | p.R221W  | c.661  | 0.08761374  | 3.542 | 1 |
| 317 | NGF    | ENST00000369512 | p.R224Q  | c.671  | 0.035120871 | 5.607 | 1 |



|             |                 |                          |             |             |       |    |
|-------------|-----------------|--------------------------|-------------|-------------|-------|----|
| 318 JUP     | ENST00000393931 | p.R572Q                  | c.1715      | 0.003849802 | 8.021 | 1  |
| 318 JUP     | ENST00000393931 | p.R602C                  | c.1804      | 0.003849802 | 0     | 1  |
| 319 CTSG    | ENST00000216336 | p.R92C                   | c.274       | 0.040134869 | 0     | 1  |
| 319 CTSG    | ENST00000216336 | p.K246I                  | c.737       | 0.040134869 | 4.639 | 1  |
| 320 NRP2    | ENST00000360409 | p.S451F                  | c.1352      | 0.030819772 | 6.02  | 1  |
| 320 NRP2    | ENST00000360409 | p.D534N                  | c.1599_1600 | 0.01170282  | 7.417 | 1  |
| 320 NRP2    | ENST00000360409 | p.Y537C                  | c.1610      | 0.02664484  | 6.23  | 1  |
| 320 NRP2    | ENST00000360409 | p.R572W                  | c.1714      | 1.034583716 | 0     | 1  |
| 320 NRP2    | ENST00000360409 | p.R572Q                  | c.1715      | 1.034583716 | 0     | 1  |
| 321 H2AFV   | ENST00000308153 | p.E60G                   | c.179       | 0.096856991 | 3.368 | 1  |
| 321 H2AFV   | ENST00000308153 | p.L62F                   | c.184       | 0.006958538 | 7.167 | 1  |
| 321 H2AFV   | ENST00000308153 | p.F28Y                   | c.83        | 0.10381553  | 0     | 1  |
| 322 DNMT3A  | ENST00000321117 | p.R720H                  | c.2159      | 0.004756117 | 8.716 | 1  |
| 322 DNMT3A  | ENST00000321117 | p.R749C                  | c.2245      | 0.011023099 | 8.404 | 1  |
| 322 DNMT3A  | ENST00000321117 | p.F751I                  | c.2251      | 0.430543357 | 2.682 | 1  |
| 322 DNMT3A  | ENST00000321117 | p.R771Q                  | c.2312      | 1.046394554 | 6.339 | 2  |
| 322 DNMT3A  | ENST00000321117 | p.R792H                  | c.2375      | 1.203191529 | 0     | 2  |
| 322 DNMT3A  | ENST00000321117 | p.G890C                  | c.2668      | 1.084617507 | 7.529 | 1  |
| 322 DNMT3A  | ENST00000321117 | p.G890D                  | c.2669      | 1.084617507 | 7.529 | 1  |
| 322 DNMT3A  | ENST00000321117 | p.R899S                  | c.2695      | 0.130712698 | 7.265 | 1  |
| 323 EGFR    | ENST00000275493 | p.L541F                  | c.1621      | 1.029096713 | 0     | 1  |
| 323 EGFR    | ENST00000275493 | p.L541I                  | c.1621      | 1.029096713 | 0     | 1  |
| 323 EGFR    | ENST00000275493 | p.C571S                  | c.1712      | 0.098447858 | 5.103 | 1  |
| 324 CD8A    | ENST00000352580 | p.A63T                   | c.187       | 0.033603137 | 5.037 | 1  |
| 324 CD8A    | ENST00000352580 | p.S66G                   | c.196       | 0.106379107 | 3.276 | 1  |
| 324 CD8A    | ENST00000352580 | p.F128L                  | c.384       | 0.133693447 | 0     | 1  |
| 325 NFE2L2  | ENST00000397062 | p.R449H                  | c.1346      | 0.273573425 | 1.87  | 1  |
| 325 NFE2L2  | ENST00000397062 | p.A511V                  | c.1532      | 0.273573425 | 0     | 1  |
| 326 CLEC4E  | ENST00000299663 | p.F93L                   | c.279       | 1.101758419 | 0     | 2  |
| 326 CLEC4E  | ENST00000299663 | p.N107S                  | c.320       | 0.171572983 | 6.272 | 1  |
| 326 CLEC4E  | ENST00000299663 | p.R203W                  | c.607       | 0.323329155 | 3.493 | 1  |
| 327 PGLYRP3 | ENST00000290722 | p.R184Q                  | c.551       | 0.155359669 | 2.718 | 1  |
| 327 PGLYRP3 | ENST00000290722 | p.V224I                  | c.670       | 0.025579322 | 5.493 | 1  |
| 327 PGLYRP3 | ENST00000290722 | p.G255R                  | c.763       | 0.174189474 | 0     | 1  |
| 328 SHC1    | ENST00000448116 | p.L46V                   | c.136       | 0.11809338  | 0     | 1  |
| 328 SHC1    | ENST00000448116 | p.P151L                  | c.452       | 0.11809338  | 3.082 | 1  |
| 329 PIK3CA  | ENST00000263967 | p.R357Q                  | c.1070      | 0.350834281 | 6.449 | 1  |
| 329 PIK3CA  | ENST00000263967 | p.C420G                  | c.1258      | 12.46618189 | 0     | 1  |
| 329 PIK3CA  | ENST00000263967 | p.C420R                  | c.1258      | 12.46618189 | 0     | 12 |
| 329 PIK3CA  | ENST00000263967 | p.G451R                  | c.1351      | 1.751534707 | 4.15  | 1  |
| 329 PIK3CA  | ENST00000263967 | p.G451V                  | c.1352      | 1.751534707 | 4.15  | 1  |
| 329 PIK3CA  | ENST00000263967 | p.E453K                  | c.1357      | 10.30262515 | 5.445 | 8  |
| 329 PIK3CA  | ENST00000263967 | p.E453Q                  | c.1357      | 10.30262515 | 5.445 | 2  |
| 329 PIK3CA  | ENST00000263967 | p.E453D                  | c.1359      | 10.30262515 | 5.445 | 1  |
| 329 PIK3CA  | ENST00000263967 | p.D454Y                  | c.1360      | 0.298062548 | 5.699 | 1  |
| 329 PIK3CA  | ENST00000263967 | p.LLNPIG455in_frame_delf | c.1365_1379 | 1.108957729 | 3.83  | 1  |
| 330 PTPRF   | ENST00000359947 | p.A1338V                 | c.4013      | 0.016921485 | 5.885 | 1  |
| 330 PTPRF   | ENST00000359947 | p.D1339N                 | c.4015      | 0.043949787 | 4.508 | 1  |
| 330 PTPRF   | ENST00000359947 | p.R1584Q                 | c.4751      | 0.060871273 | 0     | 1  |

|             |                 |                    |           |             |       |   |
|-------------|-----------------|--------------------|-----------|-------------|-------|---|
| 331 SEC13   | ENST00000383801 | p.S258R            | c.772     | 1.102379499 | 0     | 2 |
| 331 SEC13   | ENST00000383801 | p.R285C            | c.853     | 0.281797984 | 3.439 | 1 |
| 331 SEC13   | ENST00000383801 | p.K306R            | c.917     | 0.114390099 | 6.619 | 1 |
| 332 C3      | ENST00000245907 | p.D1524N           | c.4570    | 0.01406253  | 6.152 | 1 |
| 332 C3      | ENST00000245907 | p.R1532W           | c.4594    | 0.019653742 | 6.473 | 1 |
| 332 C3      | ENST00000245907 | p.H1630R           | c.4889    | 0.025319794 | 0     | 1 |
| 333 DNMT3A  | ENST00000321117 | p.A380V            | c.1139    | 0.030121906 | 7.268 | 1 |
| 333 DNMT3A  | ENST00000321117 | p.P419T            | c.1255    | 1.006488047 | 0     | 1 |
| 333 DNMT3A  | ENST00000321117 | p.P419L            | c.1256    | 1.006488047 | 0     | 1 |
| 334 PDE10A  | ENST00000539869 | p.S501C            | c.1502    | 0.26202912  | 8.007 | 1 |
| 334 PDE10A  | ENST00000539869 | p.F503L            | c.1507    | 1.261126335 | 0     | 1 |
| 334 PDE10A  | ENST00000539869 | p.F503V            | c.1507    | 1.261126335 | 0     | 1 |
| 334 PDE10A  | ENST00000539869 | p.P523S            | c.1567    | 0.275338442 | 5.559 | 1 |
| 334 PDE10A  | ENST00000539869 | p.M537K            | c.1610    | 0.395720412 | 7.881 | 1 |
| 334 PDE10A  | ENST00000539869 | p.D564N            | c.1690    | 0.294386242 | 4.867 | 1 |
| 334 PDE10A  | ENST00000539869 | p.S571N            | c.1712    | 0.503605568 | 3.122 | 1 |
| 334 PDE10A  | ENST00000539869 | p.A698D            | c.2093    | 0.088193959 | 8.596 | 1 |
| 334 PDE10A  | ENST00000539869 | p.A732P            | c.2194    | 0.153733582 | 6.739 | 1 |
| 334 PDE10A  | ENST00000539869 | p.S776L            | c.2327    | 0.299572037 | 3.822 | 1 |
| 335 RBPJ    | ENST00000342295 | p.F221in_frame_del | c.658_660 | 0.098755164 | 0     | 1 |
| 335 RBPJ    | ENST00000342295 | p.K249T            | c.746     | 0.098755164 | 3.34  | 1 |
| 336 FGFR2   | ENST00000457416 | p.E163K            | c.487     | 1.031237747 | 0     | 2 |
| 336 FGFR2   | ENST00000457416 | p.R165W            | c.493     | 0.148636975 | 8.383 | 1 |
| 336 FGFR2   | ENST00000457416 | p.H242Y            | c.724     | 0.164701684 | 5.146 | 1 |
| 337 UBE2G2  | ENST00000345496 | p.E50Q             | c.148     | 0.039336162 | 4.668 | 1 |
| 337 UBE2G2  | ENST00000345496 | p.L163V            | c.487     | 0.039336162 | 0     | 1 |
| 338 AGAP2   | ENST00000547588 | p.S469L            | c.1406    | 0.128296708 | 0     | 1 |
| 338 AGAP2   | ENST00000547588 | p.R501C            | c.1501    | 0.088083172 | 3.567 | 1 |
| 338 AGAP2   | ENST00000547588 | p.R505G            | c.1513    | 0.047625132 | 4.509 | 1 |
| 339 FKBP5   | ENST00000536438 | p.G59R             | c.175     | 0.056330524 | 0     | 1 |
| 339 FKBP5   | ENST00000536438 | p.I122M            | c.366     | 0.018946784 | 6.681 | 1 |
| 339 FKBP5   | ENST00000536438 | p.E131Q            | c.391     | 0.0465847   | 4.424 | 1 |
| 340 EPHA4   | ENST00000281821 | p.V344A            | c.1031    | 0.189743342 | 3.665 | 1 |
| 340 EPHA4   | ENST00000281821 | p.S399F            | c.1196    | 1.081364453 | 0     | 2 |
| 340 EPHA4   | ENST00000281821 | p.Y409F            | c.1226    | 0.120439436 | 9.353 | 1 |
| 340 EPHA4   | ENST00000281821 | p.V432L            | c.1294    | 0.070747783 | 9.967 | 1 |
| 341 RPL9    | ENST00000295955 | p.G87D             | c.260     | 0.009042892 | 6.789 | 1 |
| 341 RPL9    | ENST00000295955 | p.R89H             | c.266     | 0.012419769 | 7.198 | 1 |
| 341 RPL9    | ENST00000295955 | p.I151T            | c.452     | 0.015853504 | 0     | 1 |
| 342 ADRBK1  | ENST00000308595 | p.R104H            | c.311     | 0.009030365 | 6.791 | 1 |
| 342 ADRBK1  | ENST00000308595 | p.L145I            | c.433     | 0.009030365 | 0     | 1 |
| 343 CYP11A1 | ENST00000268053 | p.K382N            | c.1146    | 0.019209816 | 6.293 | 1 |
| 343 CYP11A1 | ENST00000268053 | p.R451Q            | c.1352    | 0.029007864 | 0     | 1 |
| 343 CYP11A1 | ENST00000268053 | p.D103N            | c.307     | 0.016254692 | 5.943 | 1 |
| 344 TLR5    | ENST00000366881 | p.L423I            | c.1267    | 0.120773047 | 3.087 | 1 |
| 344 TLR5    | ENST00000366881 | p.R446W            | c.1336    | 0.143926417 | 0     | 1 |
| 344 TLR5    | ENST00000366881 | p.E471D            | c.1413    | 0.029329848 | 5.252 | 1 |
| 345 MGAM    | ENST00000475668 | p.N900I            | c.2699    | 0.009112104 | 6.778 | 1 |
| 345 MGAM    | ENST00000475668 | p.E901D            | c.2703    | 0.100064351 | 3.321 | 1 |

|              |                 |          |             |             |       |     |
|--------------|-----------------|----------|-------------|-------------|-------|-----|
| 345 MGAM     | ENST00000475668 | p.I938F  | c.2812      | 0.109176456 | 0     | 1   |
| 346 BRAF     | ENST00000288602 | p.S467L  | c.1400      | 9.82216427  | 5.499 | 2   |
| 346 BRAF     | ENST00000288602 | p.D594H  | c.1780      | 5.383646501 | 7.975 | 1   |
| 346 BRAF     | ENST00000288602 | p.D594N  | c.1780      | 5.383646501 | 7.975 | 2   |
| 346 BRAF     | ENST00000288602 | p.D594G  | c.1781      | 5.383646501 | 7.975 | 1   |
| 346 BRAF     | ENST00000288602 | p.G596D  | c.1787      | 2.512428361 | 8.181 | 1   |
| 346 BRAF     | ENST00000288602 | p.L597Q  | c.1790      | 2.379273653 | 8.532 | 1   |
| 346 BRAF     | ENST00000288602 | p.V600K  | c.1799_1798 | 321.0767445 | 0     | 13  |
| 346 BRAF     | ENST00000288602 | p.V600R  | c.1799_1798 | 321.0767445 | 0     | 2   |
| 346 BRAF     | ENST00000288602 | p.V600E  | c.1800_1799 | 321.0767445 | 0     | 307 |
| 346 BRAF     | ENST00000288602 | p.K601E  | c.1801      | 7.727589944 | 9.577 | 8   |
| 347 CST5     | ENST00000304710 | p.G81E   | c.242       | 0.08207007  | 0     | 1   |
| 347 CST5     | ENST00000304710 | p.P127S  | c.379       | 0.08207007  | 3.607 | 1   |
| 348 SERPINB5 | ENST00000382771 | p.G169A  | c.506       | 0.134716643 | 2.892 | 1   |
| 348 SERPINB5 | ENST00000382771 | p.E325K  | c.973       | 0.134716643 | 0     | 1   |
| 349 KEAP1    | ENST00000171111 | p.R415C  | c.1243      | 1.187636632 | 5.478 | 1   |
| 349 KEAP1    | ENST00000171111 | p.R415H  | c.1244      | 1.187636632 | 5.478 | 1   |
| 349 KEAP1    | ENST00000171111 | p.G477S  | c.1429      | 0.100472645 | 8.683 | 1   |
| 349 KEAP1    | ENST00000171111 | p.R483C  | c.1447      | 1.259509312 | 0     | 1   |
| 349 KEAP1    | ENST00000171111 | p.R483H  | c.1448      | 1.259509312 | 0     | 1   |
| 349 KEAP1    | ENST00000171111 | p.I506V  | c.1516      | 0.278098145 | 3.213 | 1   |
| 349 KEAP1    | ENST00000171111 | p.G509W  | c.1525      | 0.232877001 | 8.929 | 1   |
| 349 KEAP1    | ENST00000171111 | p.G527F  | c.1580_1579 | 0.244220381 | 3.289 | 1   |
| 350 KCNU1    | ENST00000399881 | p.R704Q  | c.2111      | 0.297390773 | 0     | 1   |
| 350 KCNU1    | ENST00000399881 | p.Y710F  | c.2129      | 0.039569574 | 8.202 | 1   |
| 350 KCNU1    | ENST00000399881 | p.I754L  | c.2260      | 0.130641672 | 6.627 | 1   |
| 350 KCNU1    | ENST00000399881 | p.R765G  | c.2293      | 0.05181143  | 4.712 | 1   |
| 350 KCNU1    | ENST00000399881 | p.S783F  | c.2348      | 0.01353661  | 7.268 | 1   |
| 350 KCNU1    | ENST00000399881 | p.D785V  | c.2354      | 0.228499212 | 3.136 | 1   |
| 350 KCNU1    | ENST00000399881 | p.H787Y  | c.2359      | 0.037099753 | 6.484 | 1   |
| 350 KCNU1    | ENST00000399881 | p.A788V  | c.2363      | 0.17554548  | 3.129 | 1   |
| 351 PIK3CG   | ENST00000496166 | p.P424L  | c.1271      | 0.18488069  | 4.74  | 1   |
| 351 PIK3CG   | ENST00000496166 | p.H471Q  | c.1413      | 0.268905121 | 0     | 1   |
| 351 PIK3CG   | ENST00000496166 | p.F635L  | c.1905      | 0.238991054 | 8.522 | 1   |
| 351 PIK3CG   | ENST00000496166 | p.S636P  | c.1906      | 0.215316473 | 9.522 | 1   |
| 351 PIK3CG   | ENST00000496166 | p.E638Q  | c.1912      | 0.243580273 | 6.38  | 1   |
| 351 PIK3CG   | ENST00000496166 | p.H673D  | c.2017      | 0.102308173 | 6.317 | 1   |
| 351 PIK3CG   | ENST00000496166 | p.D674E  | c.2022      | 0.112803786 | 6.437 | 1   |
| 351 PIK3CG   | ENST00000496166 | p.D171N  | c.511       | 0.261533937 | 2.386 | 1   |
| 352 RPS6KA3  | ENST00000379565 | p.L506I  | c.1516      | 1.431669779 | 0     | 2   |
| 352 RPS6KA3  | ENST00000379565 | p.G614S  | c.1840      | 1.431669779 | 2.212 | 1   |
| 352 RPS6KA3  | ENST00000379565 | p.G614C  | c.1840_1839 | 1.431669779 | 2.212 | 1   |
| 353 ANK1     | ENST00000396942 | p.H578Y  | c.1732      | 0.014121136 | 6.146 | 1   |
| 353 ANK1     | ENST00000396942 | p.A609T  | c.1825      | 0.014121136 | 0     | 1   |
| 354 SNRNP200 | ENST00000323853 | p.T1085A | c.3253      | 0.009220112 | 6.761 | 1   |
| 354 SNRNP200 | ENST00000323853 | p.R1121H | c.3362      | 0.009220112 | 0     | 1   |
| 355 HDAC4    | ENST00000345617 | p.R681K  | c.2042      | 0.017775082 | 5.814 | 1   |
| 355 HDAC4    | ENST00000345617 | p.D977N  | c.2929      | 0.065206933 | 0     | 1   |
| 355 HDAC4    | ENST00000345617 | p.Q1006R | c.3017      | 0.047431852 | 4.398 | 1   |

|              |                 |          |         |             |       |   |
|--------------|-----------------|----------|---------|-------------|-------|---|
| 356 HIST1H3D | ENST00000377831 | p.E106K  | c.316   | 1.069324655 | 0     | 1 |
| 356 HIST1H3D | ENST00000377831 | p.E106Q  | c.316   | 1.069324655 | 0     | 1 |
| 356 HIST1H3J | ENST00000359303 | p.D107Y  | c.319   | 0.305591547 | 8.402 | 1 |
| 356 HIST1H3H | ENST00000369163 | p.A128P  | c.382   | 0.104035582 | 6.651 | 1 |
| 356 HIST1H3J | ENST00000359303 | p.R129H  | c.386   | 0.077419015 | 4.979 | 1 |
| 356 HIST1H3D | ENST00000377831 | p.R132L  | c.395   | 0.243752869 | 6.024 | 1 |
| 356 HIST1H3D | ENST00000377831 | p.R135S  | c.405   | 0.018684684 | 6.742 | 1 |
| 357 CBR1     | ENST00000290349 | p.V144I  | c.430   | 0.098960733 | 3.337 | 1 |
| 357 CBR1     | ENST00000290349 | p.F268C  | c.803   | 0.098960733 | 0     | 1 |
| 358 BIRC6    | ENST00000421745 | p.A4530S | c.13588 | 1.117980485 | 0     | 1 |
| 358 BIRC6    | ENST00000421745 | p.A4530V | c.13589 | 1.117980485 | 0     | 1 |
| 358 BIRC6    | ENST00000421745 | p.A4582D | c.13745 | 0.13591685  | 5.562 | 1 |
| 358 BIRC6    | ENST00000421745 | p.P4616T | c.13846 | 0.192134559 | 3.395 | 1 |
| 358 BIRC6    | ENST00000421745 | p.Q4722H | c.14166 | 0.086259026 | 9.157 | 1 |
| 359 RALB     | ENST00000474855 | p.M41K   | c.122   | 1.236350529 | 0     | 1 |
| 359 RALB     | ENST00000474855 | p.M41T   | c.122   | 1.236350529 | 0     | 1 |
| 359 RALB     | ENST00000474855 | p.F191L  | c.573   | 0.472701058 | 2.081 | 1 |
| 360 ADH1B    | ENST00000305046 | p.S194F  | c.581   | 0.19794506  | 6.221 | 1 |
| 360 ADH1B    | ENST00000305046 | p.R219K  | c.656   | 0.201631182 | 6.583 | 1 |
| 360 ADH1B    | ENST00000305046 | p.E257K  | c.769   | 3.023836636 | 0     | 4 |
| 361 JUP      | ENST00000393931 | p.L400V  | c.1198  | 0.042302778 | 0     | 1 |
| 361 JUP      | ENST00000393931 | p.V429A  | c.1286  | 0.007169062 | 7.124 | 1 |
| 361 JUP      | ENST00000393931 | p.G434C  | c.1300  | 0.035133716 | 4.831 | 1 |
| 362 CFH      | ENST00000367429 | p.E229K  | c.685   | 0.068062313 | 0     | 1 |
| 362 CFH      | ENST00000367429 | p.C251S  | c.752   | 0.068062313 | 3.877 | 1 |
| 363 MYLK4    | ENST00000274643 | p.R91H   | c.272   | 0.171239195 | 0     | 1 |
| 363 MYLK4    | ENST00000274643 | p.Y167C  | c.500   | 0.144936627 | 2.83  | 1 |
| 363 MYLK4    | ENST00000274643 | p.D168Y  | c.502   | 0.034911201 | 5.03  | 1 |
| 364 HGFAC    | ENST00000511533 | p.C528Y  | c.1583  | 0.022143084 | 0     | 1 |
| 364 HGFAC    | ENST00000511533 | p.R631W  | c.1891  | 0.022143084 | 5.497 | 1 |
| 365 SNRNP200 | ENST00000323853 | p.R1437L | c.4310  | 0.128988934 | 0     | 1 |
| 365 SNRNP200 | ENST00000323853 | p.F1736L | c.5206  | 0.08338931  | 6.531 | 1 |
| 365 SNRNP200 | ENST00000323853 | p.Y1823C | c.5468  | 0.119453173 | 3.081 | 1 |
| 366 ARL1     | ENST00000551671 | p.K62T   | c.185   | 0.019992789 | 0     | 1 |
| 366 ARL1     | ENST00000551671 | p.M170V  | c.508   | 0.002559362 | 8.61  | 1 |
| 366 ARL1     | ENST00000551671 | p.R19K   | c.56    | 0.017433427 | 5.842 | 1 |
| 367 MGAM     | ENST00000475668 | p.R98Q   | c.293   | 3.097387267 | 0     | 4 |
| 367 MGAM     | ENST00000475668 | p.P121S  | c.361   | 0.114533656 | 5.143 | 1 |
| 367 MGAM     | ENST00000475668 | p.G123E  | c.368   | 0.190263297 | 4.412 | 1 |
| 367 MGAM     | ENST00000475668 | p.C130Y  | c.389   | 0.099940898 | 5.499 | 1 |
| 368 FLT4     | ENST00000261937 | p.A405T  | c.1213  | 0.010265872 | 0     | 1 |
| 368 FLT4     | ENST00000261937 | p.P331S  | c.991   | 0.010265872 | 6.606 | 1 |
| 369 SERPINA3 | ENST00000467132 | p.K360R  | c.1079  | 0.320713812 | 3.277 | 1 |
| 369 SERPINA3 | ENST00000467132 | p.L363R  | c.1088  | 0.365339088 | 4.005 | 1 |
| 369 SERPINA3 | ENST00000467132 | p.F413L  | c.1237  | 0.246993556 | 3.304 | 1 |
| 369 SERPINA3 | ENST00000467132 | p.S415R  | c.1245  | 0.160035523 | 3.566 | 1 |
| 369 SERPINA3 | ENST00000467132 | p.K177N  | c.531   | 0.039688333 | 8.282 | 1 |
| 369 SERPINA3 | ENST00000467132 | p.W217C  | c.651   | 0.099853703 | 8.075 | 1 |
| 369 SERPINA3 | ENST00000467132 | p.L313V  | c.937   | 0.148294438 | 7.328 | 1 |

|     |          |                 |         |           |             |       |    |
|-----|----------|-----------------|---------|-----------|-------------|-------|----|
| 369 | SERPINA3 | ENST00000467132 | p.F316Y | c.947     | 0.377593046 | 0     | 1  |
| 369 | SERPINA3 | ENST00000467132 | p.S319L | c.956     | 0.042340322 | 8.975 | 1  |
| 369 | SERPINA3 | ENST00000467132 | p.D321N | c.960_961 | 0.131300533 | 6.464 | 1  |
| 370 | SORT1    | ENST00000256637 | p.V361L | c.1081    | 0.042570564 | 4.554 | 1  |
| 370 | SORT1    | ENST00000256637 | p.G309E | c.926     | 0.042570564 | 0     | 1  |
| 371 | PIK3CA   | ENST00000263967 | p.R38C  | c.112     | 9.241239798 | 4.472 | 2  |
| 371 | PIK3CA   | ENST00000263967 | p.R38S  | c.112     | 9.241239798 | 4.472 | 1  |
| 371 | PIK3CA   | ENST00000263967 | p.R38H  | c.113     | 9.241239798 | 4.472 | 5  |
| 371 | PIK3CA   | ENST00000263967 | p.R38L  | c.113     | 9.241239798 | 4.472 | 1  |
| 371 | PIK3CA   | ENST00000263967 | p.E39K  | c.115     | 7.197941223 | 2.806 | 4  |
| 371 | PIK3CA   | ENST00000263967 | p.E39G  | c.116     | 7.197941223 | 2.806 | 1  |
| 371 | PIK3CA   | ENST00000263967 | p.R88Q  | c.263     | 21.13826212 | 0     | 21 |
| 371 | PIK3CA   | ENST00000263967 | p.C90G  | c.268     | 2.655319912 | 6.815 | 1  |
| 371 | PIK3CA   | ENST00000263967 | p.C90Y  | c.269     | 2.655319912 | 6.815 | 1  |
| 372 | EPHA3    | ENST00000336596 | p.S46C  | c.137     | 0.034164604 | 5.013 | 1  |
| 372 | EPHA3    | ENST00000336596 | p.R83K  | c.248     | 0.13413285  | 0     | 1  |
| 372 | EPHA3    | ENST00000336596 | p.V133L | c.397     | 0.106358106 | 3.277 | 1  |
| 373 | KIT      | ENST00000288135 | p.E128K | c.382     | 0.394104291 | 0     | 1  |
| 373 | KIT      | ENST00000288135 | p.K176N | c.528     | 0.123547665 | 4.669 | 1  |
| 373 | KIT      | ENST00000288135 | p.R177L | c.530     | 0.276391345 | 2.666 | 1  |
| 373 | KIT      | ENST00000288135 | p.V204A | c.611     | 0.22105492  | 3.707 | 1  |
| 373 | KIT      | ENST00000288135 | p.K209I | c.626     | 0.185336079 | 3.051 | 1  |
| 374 | TP63     | ENST00000264731 | p.R337L | c.1010    | 1.190786846 | 0     | 1  |
| 374 | TP63     | ENST00000264731 | p.R337Q | c.1010    | 1.190786846 | 0     | 1  |
| 374 | TP63     | ENST00000264731 | p.R338H | c.1013    | 0.274401573 | 5.09  | 1  |
| 374 | TP63     | ENST00000264731 | p.D170N | c.508     | 0.498449889 | 2.746 | 1  |
| 374 | TP63     | ENST00000264731 | p.R226H | c.677     | 0.316751686 | 6.6   | 1  |
| 374 | TP63     | ENST00000264731 | p.E328K | c.982     | 0.270603154 | 8.927 | 1  |
| 375 | GIMAP2   | ENST00000223293 | p.D80H  | c.238     | 0.088207791 | 0     | 1  |
| 375 | GIMAP2   | ENST00000223293 | p.G29D  | c.86      | 0.063023497 | 4.491 | 1  |
| 375 | GIMAP2   | ENST00000223293 | p.G32E  | c.95      | 0.045682077 | 4.515 | 1  |
| 376 | PON1     | ENST00000542556 | p.G68E  | c.203     | 0.046557203 | 8.822 | 1  |
| 376 | PON1     | ENST00000542556 | p.G116V | c.347     | 0.107718034 | 4.327 | 1  |
| 376 | PON1     | ENST00000542556 | p.V268M | c.802     | 0.050239071 | 6.541 | 1  |
| 376 | PON1     | ENST00000542556 | p.D269N | c.805     | 0.3346452   | 0     | 1  |
| 376 | PON1     | ENST00000542556 | p.V317A | c.950     | 0.324918094 | 1.879 | 1  |
| 377 | HFE      | ENST00000357618 | p.H214Y | c.640     | 0.009112104 | 6.778 | 1  |
| 377 | HFE      | ENST00000357618 | p.T217A | c.649     | 0.008519592 | 6.875 | 1  |
| 377 | HFE      | ENST00000357618 | p.P273L | c.818     | 0.017631696 | 0     | 1  |
| 378 | CNTN1    | ENST00000551295 | p.F248L | c.742     | 0.077419776 | 4.853 | 1  |
| 378 | CNTN1    | ENST00000551295 | p.V251I | c.751     | 0.242785473 | 3.092 | 1  |
| 378 | CNTN1    | ENST00000551295 | p.Y252C | c.755     | 1.037660879 | 5.813 | 1  |
| 378 | CNTN1    | ENST00000551295 | p.Y252F | c.755     | 1.037660879 | 5.813 | 1  |
| 378 | CNTN1    | ENST00000551295 | p.R324I | c.971     | 1.187454481 | 0     | 1  |
| 378 | CNTN1    | ENST00000551295 | p.R324K | c.971     | 1.187454481 | 0     | 1  |
| 379 | TXNDC5   | ENST00000379757 | p.T335I | c.1004    | 0.012413038 | 6.332 | 1  |
| 379 | TXNDC5   | ENST00000379757 | p.V393I | c.1177    | 0.012413038 | 0     | 1  |
| 380 | GPX5     | ENST00000412168 | p.V69M  | c.205     | 0.168169766 | 0     | 1  |
| 380 | GPX5     | ENST00000412168 | p.G98D  | c.293     | 0.06051919  | 4.202 | 1  |

|     |         |                 |          |        |             |       |   |
|-----|---------|-----------------|----------|--------|-------------|-------|---|
| 380 | GPX5    | ENST00000412168 | p.E108Q  | c.322  | 0.074535752 | 3.884 | 1 |
| 380 | GPX5    | ENST00000412168 | p.N182D  | c.544  | 0.051730491 | 4.439 | 1 |
| 381 | THEM4   | ENST00000368814 | p.N183K  | c.549  | 0.037733768 | 4.728 | 1 |
| 381 | THEM4   | ENST00000368814 | p.A226V  | c.677  | 0.037733768 | 0     | 1 |
| 382 | CAPN3   | ENST00000397163 | p.D671N  | c.2011 | 1.018826005 | 0     | 1 |
| 382 | CAPN3   | ENST00000397163 | p.D671E  | c.2013 | 1.018826005 | 0     | 1 |
| 382 | CAPN3   | ENST00000397163 | p.E695Q  | c.2083 | 0.020526442 | 7.076 | 1 |
| 382 | CAPN3   | ENST00000397163 | p.R698H  | c.2093 | 0.032281897 | 6.453 | 1 |
| 383 | GRIA2   | ENST00000296526 | p.N75D   | c.223  | 0.068360918 | 0     | 1 |
| 383 | GRIA2   | ENST00000296526 | p.A332E  | c.995  | 0.046447468 | 4.461 | 1 |
| 383 | GRIA2   | ENST00000296526 | p.N333H  | c.997  | 0.02399807  | 5.445 | 1 |
| 384 | LRBA    | ENST00000357115 | p.P2247S | c.6739 | 0.007267619 | 0     | 1 |
| 384 | LRBA    | ENST00000357115 | p.D2268N | c.6802 | 0.004474679 | 7.804 | 1 |
| 384 | LRBA    | ENST00000357115 | p.S2270F | c.6809 | 0.002792939 | 8.484 | 1 |
| 385 | SIRT2   | ENST00000249396 | p.P128L  | c.383  | 0.042600081 | 0     | 1 |
| 385 | SIRT2   | ENST00000249396 | p.K220N  | c.660  | 0.042600081 | 4.553 | 1 |
| 386 | ITGAX   | ENST00000562522 | p.S930I  | c.2789 | 0.09011306  | 3.667 | 1 |
| 386 | ITGAX   | ENST00000562522 | p.E932K  | c.2794 | 0.047630574 | 5.479 | 1 |
| 386 | ITGAX   | ENST00000562522 | p.R954K  | c.2861 | 0.22335584  | 0     | 1 |
| 386 | ITGAX   | ENST00000562522 | p.E1042K | c.3124 | 0.016782129 | 6.144 | 1 |
| 386 | ITGAX   | ENST00000562522 | p.T1046I | c.3137 | 0.120526074 | 3.21  | 1 |
| 387 | IL20RA  | ENST00000316649 | p.A143T  | c.427  | 0.002551187 | 9.373 | 1 |
| 387 | IL20RA  | ENST00000316649 | p.V183M  | c.547  | 0.06574709  | 3.95  | 1 |
| 387 | IL20RA  | ENST00000316649 | p.R192K  | c.575  | 0.001522861 | 9.359 | 1 |
| 387 | IL20RA  | ENST00000316649 | p.H217Y  | c.649  | 0.067735073 | 0     | 1 |
| 388 | EGFR    | ENST00000275493 | p.T354M  | c.1061 | 0.201953377 | 0     | 1 |
| 388 | EGFR    | ENST00000275493 | p.R377S  | c.1131 | 0.016087021 | 6.207 | 1 |
| 388 | EGFR    | ENST00000275493 | p.T384S  | c.1151 | 0.190967371 | 2.408 | 1 |
| 389 | FGG     | ENST00000407946 | p.D167N  | c.499  | 1.010194961 | 0     | 1 |
| 389 | FGG     | ENST00000407946 | p.D167E  | c.501  | 1.010194961 | 0     | 1 |
| 389 | FGG     | ENST00000407946 | p.S198N  | c.593  | 0.020389921 | 6.616 | 1 |
| 390 | CFH     | ENST00000367429 | p.A998V  | c.2993 | 0.027680235 | 0     | 1 |
| 390 | CFH     | ENST00000367429 | p.A1019V | c.3056 | 0.027680235 | 5.175 | 1 |
| 391 | CYP2A13 | ENST00000330436 | p.K342T  | c.1025 | 0.15822788  | 0     | 1 |
| 391 | CYP2A13 | ENST00000330436 | p.D345N  | c.1033 | 0.012657644 | 9.787 | 1 |
| 391 | CYP2A13 | ENST00000330436 | p.F452L  | c.1356 | 0.027808031 | 9.386 | 1 |
| 391 | CYP2A13 | ENST00000330436 | p.R143H  | c.428  | 0.0630287   | 4.123 | 1 |
| 391 | CYP2A13 | ENST00000330436 | p.Q150L  | c.449  | 0.130590036 | 3.348 | 1 |
| 392 | PNP     | ENST00000361505 | p.P57S   | c.169  | 0.107848417 | 3.24  | 1 |
| 392 | PNP     | ENST00000361505 | p.R58Q   | c.173  | 0.020950766 | 5.722 | 1 |
| 392 | PNP     | ENST00000361505 | p.K95M   | c.284  | 0.124788677 | 0     | 1 |
| 393 | LIG1    | ENST00000263274 | p.V760A  | c.2279 | 0.170087845 | 3.291 | 1 |
| 393 | LIG1    | ENST00000263274 | p.P838S  | c.2512 | 0.148861116 | 3.627 | 1 |
| 393 | LIG1    | ENST00000263274 | p.P884L  | c.2651 | 0.183107103 | 0     | 1 |
| 394 | UBE2D3  | ENST00000321805 | p.S100Y  | c.299  | 0.065179117 | 0     | 1 |
| 394 | UBE2D3  | ENST00000321805 | p.D12N   | c.34   | 0.040191646 | 4.674 | 1 |
| 394 | UBE2D3  | ENST00000321805 | p.C21W   | c.63   | 0.027024949 | 5.265 | 1 |
| 395 | CHAT    | ENST00000337653 | p.L387F  | c.1159 | 0.054017443 | 4.295 | 1 |
| 395 | CHAT    | ENST00000337653 | p.A418V  | c.1253 | 0.09597304  | 4.05  | 1 |

|             |                 |                    |           |             |       |   |
|-------------|-----------------|--------------------|-----------|-------------|-------|---|
| 395 CHAT    | ENST00000337653 | p.L502R            | c.1505    | 0.112467633 | 9.104 | 1 |
| 395 CHAT    | ENST00000337653 | p.F312L            | c.936     | 0.113130326 | 0     | 1 |
| 396 CD38    | ENST00000226279 | p.S126N            | c.377     | 0.258449321 | 0     | 1 |
| 396 CD38    | ENST00000226279 | p.R212C            | c.634     | 0.049709    | 4.974 | 1 |
| 396 CD38    | ENST00000226279 | p.D217G            | c.650     | 0.034562642 | 5.115 | 1 |
| 396 CD38    | ENST00000226279 | p.S220N            | c.659     | 0.133667554 | 3.094 | 1 |
| 396 CD38    | ENST00000226279 | p.F222S            | c.665     | 0.095000657 | 3.632 | 1 |
| 397 ARF1    | ENST00000541182 | p.K36T             | c.107     | 0.07728328  | 0     | 1 |
| 397 ARF1    | ENST00000541182 | p.I4M              | c.12      | 0.072192862 | 3.792 | 1 |
| 397 ARF1    | ENST00000541182 | p.I61L             | c.181     | 0.008768069 | 7.618 | 1 |
| 398 APPL1   | ENST00000288266 | p.M510I            | c.1530    | 0.111285937 | 0     | 1 |
| 398 APPL1   | ENST00000288266 | p.R563G            | c.1687    | 0.110549141 | 3.264 | 1 |
| 398 APPL1   | ENST00000288266 | p.V587A            | c.1760    | 0.007188966 | 7.12  | 1 |
| 399 GEM     | ENST00000297596 | p.Y76F             | c.227     | 0.096342906 | 3.592 | 1 |
| 399 GEM     | ENST00000297596 | p.R77Q             | c.230     | 0.190550512 | 2.628 | 1 |
| 399 GEM     | ENST00000297596 | p.D151N            | c.451     | 0.247181956 | 0     | 1 |
| 399 GEM     | ENST00000297596 | p.F217L            | c.649     | 0.017853148 | 8.652 | 1 |
| 400 JMJD6   | ENST00000445478 | p.L160P            | c.479     | 0.006003419 | 7.38  | 1 |
| 400 JMJD6   | ENST00000445478 | p.I315S            | c.944     | 0.006003419 | 0     | 1 |
| 401 EPHA5   | ENST00000273854 | p.I736N            | c.2207    | 0.045943354 | 4.444 | 1 |
| 401 EPHA5   | ENST00000273854 | p.L791P            | c.2372    | 0.045943354 | 0     | 1 |
| 402 RMI1    | ENST00000325875 | p.W56L             | c.167     | 0.115526932 | 3.437 | 1 |
| 402 RMI1    | ENST00000325875 | p.L57F             | c.169     | 0.262360817 | 2.694 | 1 |
| 402 RMI1    | ENST00000325875 | p.K166N            | c.498     | 0.282839583 | 0     | 1 |
| 402 RMI1    | ENST00000325875 | p.G192S            | c.574     | 0.138453813 | 4.797 | 1 |
| 403 PLEK    | ENST00000234313 | p.F35L             | c.105     | 0.265262391 | 2.047 | 1 |
| 403 PLEK    | ENST00000234313 | p.G46R             | c.136     | 0.066452762 | 4.275 | 1 |
| 403 PLEK    | ENST00000234313 | p.H79N             | c.235     | 0.338172327 | 0     | 1 |
| 403 PLEK    | ENST00000234313 | p.G15A             | c.44      | 0.057608922 | 4.489 | 1 |
| 405 U2AF1   | ENST00000291552 | p.V115I            | c.343     | 0.129029823 | 8.808 | 1 |
| 405 U2AF1   | ENST00000291552 | p.222in_frame_insG | c.654_653 | 1.020142273 | 0     | 2 |
| 406 MVD     | ENST00000301012 | p.R64Q             | c.191     | 0.003708368 | 8.075 | 1 |
| 406 MVD     | ENST00000301012 | p.S114L            | c.341     | 0.003708368 | 0     | 1 |
| 407 HCK     | ENST00000375852 | p.Y515C            | c.1544    | 0.197977407 | 3.087 | 1 |
| 407 HCK     | ENST00000375852 | p.D153H            | c.457     | 0.115898297 | 6.912 | 1 |
| 407 HCK     | ENST00000375852 | p.A154S            | c.460     | 0.208686896 | 0     | 1 |
| 407 HCK     | ENST00000375852 | p.T194S            | c.581     | 0.141159398 | 3.596 | 1 |
| 408 KLHL12  | ENST00000435533 | p.R355C            | c.1063    | 0.11957602  | 3.064 | 1 |
| 408 KLHL12  | ENST00000435533 | p.D376N            | c.1126    | 0.11957602  | 0     | 1 |
| 409 TOP2A   | ENST00000423485 | p.R494L            | c.1481    | 0.025541729 | 5.291 | 1 |
| 409 TOP2A   | ENST00000423485 | p.F556C            | c.1667    | 0.025541729 | 0     | 1 |
| 410 KLK3    | ENST00000598145 | p.W143C            | c.429     | 0.074738737 | 0     | 1 |
| 411 CYP2C19 | ENST00000371321 | p.D360N            | c.1078    | 1.033553316 | 9.125 | 1 |
| 411 CYP2C19 | ENST00000371321 | p.D360E            | c.1080    | 1.033553316 | 9.125 | 1 |
| 411 CYP2C19 | ENST00000371321 | p.R377K            | c.1130    | 0.062050109 | 7.121 | 1 |
| 411 CYP2C19 | ENST00000371321 | p.S393F            | c.1178    | 0.431686296 | 2.933 | 1 |
| 411 CYP2C19 | ENST00000371321 | p.G79R             | c.235     | 2.141708048 | 0     | 1 |
| 411 CYP2C19 | ENST00000371321 | p.G79E             | c.236     | 2.141708048 | 0     | 2 |
| 412 C6      | ENST00000263413 | p.H364N            | c.1090    | 0.124375067 | 6.114 | 1 |

|            |                 |          |        |             |       |   |
|------------|-----------------|----------|--------|-------------|-------|---|
| 412 C6     | ENST00000263413 | p.E486D  | c.1458 | 0.170923654 | 4.529 | 1 |
| 412 C6     | ENST00000263413 | p.E265K  | c.793  | 0.312435332 | 3.628 | 1 |
| 412 C6     | ENST00000263413 | p.R289K  | c.866  | 1.149839415 | 0     | 2 |
| 412 C6     | ENST00000263413 | p.S290I  | c.869  | 0.240295642 | 6.48  | 1 |
| 413 LINGO1 | ENST00000355300 | p.R338C  | c.1012 | 0.028368779 | 6.247 | 1 |
| 413 LINGO1 | ENST00000355300 | p.K242N  | c.726  | 0.19830282  | 5.416 | 1 |
| 413 LINGO1 | ENST00000355300 | p.T266M  | c.797  | 0.462778268 | 2.693 | 1 |
| 413 LINGO1 | ENST00000355300 | p.R290C  | c.868  | 1.202393802 | 0     | 1 |
| 413 LINGO1 | ENST00000355300 | p.R290S  | c.868  | 1.202393802 | 0     | 1 |
| 413 LINGO1 | ENST00000355300 | p.L311F  | c.931  | 1.074098739 | 7.485 | 1 |
| 413 LINGO1 | ENST00000355300 | p.L311I  | c.931  | 1.074098739 | 7.485 | 1 |
| 414 HEXB   | ENST00000261416 | p.P141L  | c.422  | 0.025837896 | 6.121 | 1 |
| 414 HEXB   | ENST00000261416 | p.R170Q  | c.509  | 0.16310223  | 2.772 | 1 |
| 414 HEXB   | ENST00000261416 | p.L220F  | c.658  | 0.027396058 | 5.387 | 1 |
| 414 HEXB   | ENST00000261416 | p.A225V  | c.674  | 0.013565745 | 6.401 | 1 |
| 414 HEXB   | ENST00000261416 | p.R281Q  | c.842  | 0.196500015 | 0     | 1 |
| 415 HCK    | ENST00000375852 | p.E334K  | c.1000 | 0.346817483 | 4.452 | 1 |
| 415 HCK    | ENST00000375852 | p.V405A  | c.1214 | 0.175503619 | 8.451 | 1 |
| 415 HCK    | ENST00000375852 | p.R259W  | c.775  | 1.114121084 | 0     | 2 |
| 415 HCK    | ENST00000375852 | p.S261Y  | c.782  | 0.203075547 | 7.379 | 1 |
| 415 HCK    | ENST00000375852 | p.L262I  | c.784  | 0.210942605 | 7.318 | 1 |
| 415 HCK    | ENST00000375852 | p.G271E  | c.812  | 0.245305734 | 9.878 | 1 |
| 415 HCK    | ENST00000375852 | p.M292I  | c.876  | 0.512880086 | 7.263 | 1 |
| 415 HCK    | ENST00000375852 | p.E305Q  | c.913  | 0.273031956 | 8.242 | 1 |
| 415 HCK    | ENST00000375852 | p.I329M  | c.987  | 0.582534417 | 4.559 | 1 |
| 416 TAF4   | ENST00000252996 | p.N598H  | c.1792 | 0.04591152  | 4.445 | 1 |
| 416 TAF4   | ENST00000252996 | p.R640M  | c.1919 | 0.04591152  | 0     | 1 |
| 417 HK2    | ENST00000290573 | p.K488R  | c.1463 | 0.155013516 | 0     | 1 |
| 417 HK2    | ENST00000290573 | p.R846Q  | c.2537 | 0.015677651 | 6.439 | 1 |
| 417 HK2    | ENST00000290573 | p.L882M  | c.2644 | 0.147639738 | 2.801 | 1 |
| 418 LRBA   | ENST00000357115 | p.K2174N | c.6522 | 0.065215263 | 5.892 | 1 |
| 418 LRBA   | ENST00000357115 | p.R2196H | c.6587 | 2.024508851 | 0     | 3 |
| 418 LRBA   | ENST00000357115 | p.E2392K | c.7174 | 0.065420041 | 7.608 | 1 |
| 418 LRBA   | ENST00000357115 | p.P2394L | c.7181 | 0.027559156 | 8.619 | 1 |
| 419 DDX53  | ENST00000327968 | p.I349F  | c.1045 | 0.200407333 | 0     | 1 |
| 419 DDX53  | ENST00000327968 | p.L284I  | c.850  | 0.005578141 | 7.486 | 1 |
| 419 DDX53  | ENST00000327968 | p.P297H  | c.890  | 0.100294875 | 3.45  | 1 |
| 419 DDX53  | ENST00000327968 | p.L300I  | c.898  | 0.104844218 | 3.38  | 1 |
| 419 DDX53  | ENST00000327968 | p.V312M  | c.934  | 0.065705088 | 7.104 | 1 |
| 420 CYP7A1 | ENST00000301645 | p.L42M   | c.124  | 1.104548495 | 0     | 1 |
| 420 CYP7A1 | ENST00000301645 | p.L42P   | c.125  | 1.104548495 | 0     | 1 |
| 420 CYP7A1 | ENST00000301645 | p.G49S   | c.145  | 0.014264075 | 9.938 | 1 |
| 420 CYP7A1 | ENST00000301645 | p.A484T  | c.1450 | 0.17900308  | 3.584 | 1 |
| 420 CYP7A1 | ENST00000301645 | p.C69Y   | c.206  | 0.017530367 | 6.834 | 1 |
| 420 CYP7A1 | ENST00000301645 | p.A221E  | c.662  | 0.022749837 | 6.458 | 1 |
| 421 UXS1   | ENST00000283148 | p.S107C  | c.320  | 0.331743494 | 7.43  | 1 |
| 421 UXS1   | ENST00000283148 | p.E135Q  | c.403  | 2.011510082 | 0     | 1 |
| 421 UXS1   | ENST00000283148 | p.E135A  | c.404  | 2.011510082 | 0     | 1 |
| 421 UXS1   | ENST00000283148 | p.E135D  | c.405  | 2.011510082 | 0     | 1 |



|              |                 |         |        |             |       |    |
|--------------|-----------------|---------|--------|-------------|-------|----|
| 421 UXS1     | ENST00000283148 | p.R270H | c.809  | 0.431487884 | 7.452 | 1  |
| 422 CYP7A1   | ENST00000301645 | p.D213N | c.637  | 1.072299136 | 0     | 2  |
| 422 CYP7A1   | ENST00000301645 | p.A234D | c.701  | 0.019077289 | 6.712 | 1  |
| 422 CYP7A1   | ENST00000301645 | p.A288S | c.862  | 0.125520943 | 3.994 | 1  |
| 423 CDC25B   | ENST00000245960 | p.F489L | c.1467 | 0.079384436 | 3.655 | 1  |
| 423 CDC25B   | ENST00000245960 | p.M545T | c.1634 | 0.079384436 | 0     | 1  |
| 424 STK11    | ENST00000326873 | p.D176A | c.527  | 0.175757649 | 7.848 | 1  |
| 424 STK11    | ENST00000326873 | p.N181Y | c.541  | 1.032504345 | 0     | 1  |
| 424 STK11    | ENST00000326873 | p.N181I | c.542  | 1.032504345 | 0     | 1  |
| 424 STK11    | ENST00000326873 | p.S216F | c.647  | 0.223851136 | 5.15  | 1  |
| 425 DDI1     | ENST00000302259 | p.L335P | c.1004 | 0.08562778  | 7.784 | 1  |
| 425 DDI1     | ENST00000302259 | p.F258S | c.773  | 0.147369002 | 6.671 | 1  |
| 425 DDI1     | ENST00000302259 | p.S261L | c.782  | 0.149665728 | 3.664 | 1  |
| 425 DDI1     | ENST00000302259 | p.G262V | c.785  | 0.039485533 | 5.485 | 1  |
| 425 DDI1     | ENST00000302259 | p.A263D | c.788  | 0.173419662 | 2.778 | 1  |
| 425 DDI1     | ENST00000302259 | p.M328R | c.983  | 0.137460501 | 9.548 | 1  |
| 425 DDI1     | ENST00000302259 | p.L332I | c.994  | 0.262699087 | 0     | 1  |
| 426 PIGR     | ENST00000356495 | p.Y494C | c.1481 | 0.003629534 | 8.106 | 1  |
| 426 PIGR     | ENST00000356495 | p.A516V | c.1547 | 0.003629534 | 0     | 1  |
| 427 AP1B1    | ENST00000405198 | p.S40L  | c.119  | 0.015197734 | 0     | 1  |
| 427 AP1B1    | ENST00000405198 | p.Y76H  | c.226  | 0.015197734 | 6.04  | 1  |
| 428 MYH7     | ENST00000355349 | p.R237Q | c.710  | 0.144981113 | 3.006 | 1  |
| 428 MYH7     | ENST00000355349 | p.N238K | c.714  | 0.011711832 | 6.76  | 1  |
| 428 MYH7     | ENST00000355349 | p.E280K | c.838  | 0.293949725 | 0     | 1  |
| 428 MYH7     | ENST00000355349 | p.D282E | c.846  | 0.053715814 | 7.707 | 1  |
| 428 MYH7     | ENST00000355349 | p.S314F | c.941  | 0.029314234 | 6.564 | 1  |
| 428 MYH7     | ENST00000355349 | p.G316R | c.946  | 0.198822647 | 2.787 | 1  |
| 429 FBXW7    | ENST00000603548 | p.T385K | c.1154 | 0.754925512 | 5.912 | 1  |
| 429 FBXW7    | ENST00000603548 | p.S426L | c.1277 | 3.807783423 | 2.87  | 1  |
| 429 FBXW7    | ENST00000603548 | p.G437R | c.1309 | 0.633099627 | 5.524 | 1  |
| 429 FBXW7    | ENST00000603548 | p.R465C | c.1393 | 26.49928975 | 0     | 10 |
| 429 FBXW7    | ENST00000603548 | p.R465H | c.1394 | 26.49928975 | 0     | 14 |
| 429 FBXW7    | ENST00000603548 | p.S476I | c.1427 | 1.073963668 | 8.976 | 1  |
| 429 FBXW7    | ENST00000603548 | p.S476R | c.1428 | 1.073963668 | 8.976 | 1  |
| 429 FBXW7    | ENST00000603548 | p.R479P | c.1436 | 5.329626149 | 9.279 | 1  |
| 429 FBXW7    | ENST00000603548 | p.R479Q | c.1436 | 5.329626149 | 9.279 | 5  |
| 429 FBXW7    | ENST00000603548 | p.R505C | c.1513 | 24.91148582 | 2.758 | 9  |
| 429 FBXW7    | ENST00000603548 | p.R505G | c.1513 | 24.91148582 | 2.758 | 10 |
| 429 FBXW7    | ENST00000603548 | p.R505S | c.1513 | 24.91148582 | 2.758 | 1  |
| 429 FBXW7    | ENST00000603548 | p.R505H | c.1514 | 24.91148582 | 2.758 | 1  |
| 429 FBXW7    | ENST00000603548 | p.R505L | c.1514 | 24.91148582 | 2.758 | 1  |
| 429 FBXW7    | ENST00000603548 | p.R543G | c.1627 | 0.456319897 | 9.332 | 1  |
| 429 FBXW7    | ENST00000603548 | p.Y545C | c.1634 | 3.965100103 | 5.313 | 2  |
| 429 FBXW7    | ENST00000603548 | p.S546L | c.1637 | 0.840210304 | 7.971 | 1  |
| 429 FBXW7    | ENST00000603548 | p.S585T | c.1754 | 0.635102071 | 8.673 | 1  |
| 430 HIST1H3D | ENST00000377831 | p.P67S  | c.199  | 1.070202738 | 0     | 1  |
| 430 HIST1H3D | ENST00000377831 | p.P67R  | c.200  | 1.070202738 | 0     | 1  |
| 430 HIST1H3D | ENST00000377831 | p.F68Y  | c.203  | 0.017227967 | 9.9   | 1  |
| 430 HIST1H3J | ENST00000359303 | p.A92V  | c.275  | 0.153446828 | 3.854 | 1  |

|     |           |                 |          |           |             |       |   |
|-----|-----------|-----------------|----------|-----------|-------------|-------|---|
| 431 | TMPRSS15  | ENST00000284885 | p.D876N  | c.2626    | 0.027321917 | 5.808 | 1 |
| 431 | TMPRSS15  | ENST00000284885 | p.N953I  | c.2858    | 0.036276607 | 0     | 1 |
| 431 | TMPRSS15  | ENST00000284885 | p.V1007F | c.3019    | 0.026771708 | 5.762 | 1 |
| 432 | ALB       | ENST00000295897 | p.L540H  | c.1619    | 0.067367396 | 7.491 | 1 |
| 432 | ALB       | ENST00000295897 | p.R138Q  | c.413     | 0.176393632 | 3.149 | 1 |
| 432 | ALB       | ENST00000295897 | p.Y162N  | c.484     | 0.128278455 | 3.134 | 1 |
| 432 | ALB       | ENST00000295897 | p.H170Y  | c.508     | 0.016410013 | 6.224 | 1 |
| 432 | ALB       | ENST00000295897 | p.R210W  | c.628     | 0.245583866 | 0     | 1 |
| 433 | STAT1     | ENST00000409465 | p.L514V  | c.1540    | 0.009618316 | 6.7   | 1 |
| 433 | STAT1     | ENST00000409465 | p.M579L  | c.1735    | 0.009618316 | 0     | 1 |
| 434 | TLR4      | ENST00000355622 | p.V461G  | c.1382    | 0.209299071 | 9.507 | 1 |
| 434 | TLR4      | ENST00000355622 | p.G480C  | c.1438    | 0.2978166   | 2.873 | 1 |
| 434 | TLR4      | ENST00000355622 | p.S482F  | c.1445    | 0.186774861 | 6.862 | 1 |
| 434 | TLR4      | ENST00000355622 | p.S504P  | c.1510    | 1.316184031 | 0     | 1 |
| 434 | TLR4      | ENST00000355622 | p.S504C  | c.1511    | 1.316184031 | 0     | 1 |
| 434 | TLR4      | ENST00000355622 | p.N526Y  | c.1576    | 0.295601365 | 3.003 | 1 |
| 434 | TLR4      | ENST00000355622 | p.H529R  | c.1586    | 0.115986308 | 4.569 | 1 |
| 434 | TLR4      | ENST00000355622 | p.L549I  | c.1645    | 0.071959136 | 8.46  | 1 |
| 435 | SARS      | ENST00000369923 | p.H280Y  | c.838     | 0.086839066 | 3.554 | 1 |
| 435 | SARS      | ENST00000369923 | p.R281L  | c.842_843 | 0.021640576 | 5.648 | 1 |
| 435 | SARS      | ENST00000369923 | p.R286W  | c.856     | 0.005140057 | 7.604 | 1 |
| 435 | SARS      | ENST00000369923 | p.Y329C  | c.986     | 0.110223821 | 0     | 1 |
| 436 | ANXA2     | ENST00000332680 | p.S135F  | c.404     | 0.187682998 | 2.66  | 1 |
| 436 | ANXA2     | ENST00000332680 | p.T141P  | c.421     | 0.032274187 | 5.354 | 1 |
| 436 | ANXA2     | ENST00000332680 | p.D142N  | c.424     | 0.191318396 | 2.628 | 1 |
| 436 | ANXA2     | ENST00000332680 | p.S179L  | c.536     | 0.344438149 | 0     | 1 |
| 437 | FTSJ2     | ENST00000242257 | p.R53Q   | c.158     | 0.18526291  | 0     | 1 |
| 437 | FTSJ2     | ENST00000242257 | p.L60F   | c.178     | 0.022426492 | 9.794 | 1 |
| 437 | FTSJ2     | ENST00000242257 | p.P83S   | c.247     | 0.146250426 | 2.943 | 1 |
| 437 | FTSJ2     | ENST00000242257 | p.A85V   | c.254     | 0.081061977 | 4.241 | 1 |
| 437 | FTSJ2     | ENST00000242257 | p.L114V  | c.340     | 0.103700951 | 9.686 | 1 |
| 438 | SFTPD     | ENST00000372292 | p.G166R  | c.496     | 0.01620555  | 6.048 | 1 |
| 438 | SFTPD     | ENST00000372292 | p.G184W  | c.550     | 0.07791934  | 3.791 | 1 |
| 438 | SFTPD     | ENST00000372292 | p.K250T  | c.749     | 0.152433393 | 0     | 1 |
| 438 | SFTPD     | ENST00000372292 | p.T275A  | c.823     | 0.093515955 | 3.978 | 1 |
| 438 | SFTPD     | ENST00000372292 | p.V305I  | c.913     | 0.02708741  | 9.273 | 1 |
| 439 | BLM       | ENST00000355112 | p.H1140Q | c.3420    | 0.129416847 | 2.971 | 1 |
| 439 | BLM       | ENST00000355112 | p.R1144I | c.3431    | 0.016609773 | 6.085 | 1 |
| 439 | BLM       | ENST00000355112 | p.E1193Q | c.3577    | 0.142269091 | 0     | 1 |
| 440 | DGKD      | ENST00000264057 | p.T217I  | c.650     | 0.043284671 | 4.53  | 1 |
| 440 | DGKD      | ENST00000264057 | p.D253N  | c.757     | 0.043284671 | 0     | 1 |
| 441 | SERPINA12 | ENST00000556881 | p.I341M  | c.1023    | 0.113390196 | 3.219 | 1 |
| 441 | SERPINA12 | ENST00000556881 | p.A342T  | c.1024    | 0.061817968 | 4.163 | 1 |
| 441 | SERPINA12 | ENST00000556881 | p.P146L  | c.437     | 0.16321796  | 0     | 1 |
| 443 | BIRC8     | ENST00000426466 | p.M1V    | c.1       | 0.0114065   | 6.454 | 1 |
| 443 | BIRC8     | ENST00000426466 | p.K67E   | c.199     | 0.007747787 | 7.012 | 1 |
| 443 | BIRC8     | ENST00000426466 | p.Q93K   | c.277     | 0.064893303 | 0     | 1 |
| 443 | BIRC8     | ENST00000426466 | p.E21Q   | c.61      | 0.013231996 | 8.585 | 1 |
| 443 | BIRC8     | ENST00000426466 | p.G3S    | c.7       | 0.043134917 | 4.535 | 1 |

|              |                 |         |        |             |       |   |
|--------------|-----------------|---------|--------|-------------|-------|---|
| 444 VDR      | ENST00000550325 | p.K344M | c.1031 | 0.495491843 | 2.704 | 1 |
| 444 VDR      | ENST00000550325 | p.R346H | c.1037 | 0.271752284 | 3.602 | 1 |
| 444 VDR      | ENST00000550325 | p.K449M | c.1346 | 0.473400203 | 2.773 | 1 |
| 444 VDR      | ENST00000550325 | p.R208C | c.622  | 2.382121788 | 0     | 3 |
| 445 SERPINA3 | ENST00000467132 | p.G138R | c.412  | 1.134904587 | 0     | 1 |
| 445 SERPINA3 | ENST00000467132 | p.G138E | c.413  | 1.134904587 | 0     | 1 |
| 445 SERPINA3 | ENST00000467132 | p.A140S | c.418  | 0.35884304  | 6.458 | 1 |
| 445 SERPINA3 | ENST00000467132 | p.E164Q | c.490  | 0.189598668 | 5.335 | 1 |
| 445 SERPINA3 | ENST00000467132 | p.Y183N | c.547  | 0.337384376 | 3.34  | 1 |
| 446 SUPT5H   | ENST00000432763 | p.E430A | c.1289 | 0.0379699   | 4.719 | 1 |
| 446 SUPT5H   | ENST00000432763 | p.R469I | c.1406 | 0.0379699   | 0     | 1 |
| 447 HSD17B10 | ENST00000168216 | p.G34E  | c.101  | 0.218696191 | 2.193 | 1 |
| 447 HSD17B10 | ENST00000168216 | p.G10D  | c.29   | 0.218696191 | 0     | 1 |
| 448 MUT      | ENST00000274813 | p.Q476P | c.1427 | 0.006768257 | 7.207 | 1 |
| 448 MUT      | ENST00000274813 | p.S481C | c.1442 | 0.009759345 | 6.679 | 1 |
| 448 MUT      | ENST00000274813 | p.P729S | c.2185 | 0.016527601 | 0     | 1 |
| 449 PLG      | ENST00000308192 | p.G395E | c.1184 | 1.050146378 | 0     | 1 |
| 449 PLG      | ENST00000308192 | p.G395V | c.1184 | 1.050146378 | 0     | 1 |
| 449 PLG      | ENST00000308192 | p.D441N | c.1321 | 0.124663189 | 6.678 | 1 |
| 449 PLG      | ENST00000308192 | p.P442H | c.1325 | 0.176716604 | 6.66  | 1 |
| 449 PLG      | ENST00000308192 | p.E447K | c.1339 | 0.140902912 | 5.168 | 1 |
| 449 PLG      | ENST00000308192 | p.P225S | c.673  | 0.222899627 | 9.666 | 1 |
| 449 PLG      | ENST00000308192 | p.Q29H  | c.87   | 0.078662445 | 9.434 | 1 |
| 450 BCHE     | ENST00000264381 | p.G441V | c.1322 | 0.131174565 | 9.448 | 1 |
| 450 BCHE     | ENST00000264381 | p.L274V | c.820  | 0.428851297 | 0     | 1 |
| 450 BCHE     | ENST00000264381 | p.E299K | c.895  | 0.107921684 | 5.152 | 1 |
| 450 BCHE     | ENST00000264381 | p.E304K | c.910  | 0.246329309 | 2.316 | 1 |
| 450 BCHE     | ENST00000264381 | p.V307I | c.919  | 0.243910628 | 2.333 | 1 |
| 451 JMJD6    | ENST00000445478 | p.P129L | c.386  | 0.031163477 | 5.004 | 1 |
| 451 JMJD6    | ENST00000445478 | p.G183E | c.548  | 0.031163477 | 0     | 1 |
| 452 GIF      | ENST00000257248 | p.S365Y | c.1094 | 1.05041167  | 0     | 2 |
| 452 GIF      | ENST00000257248 | p.L94I  | c.280  | 0.129378854 | 4.339 | 1 |
| 452 GIF      | ENST00000257248 | p.A138V | c.413  | 0.225161482 | 9.966 | 1 |
| 453 C8B      | ENST00000371237 | p.S502F | c.1505 | 2.030300794 | 0     | 3 |
| 453 C8B      | ENST00000371237 | p.W548C | c.1644 | 0.05664464  | 5.935 | 1 |
| 453 C8B      | ENST00000371237 | p.P92S  | c.274  | 1.139361688 | 7.163 | 2 |
| 454 PRPS1    | ENST00000543248 | p.W162C | c.486  | 0.090218894 | 3.506 | 1 |
| 454 PRPS1    | ENST00000543248 | p.R163K | c.488  | 0.027161502 | 5.324 | 1 |
| 454 PRPS1    | ENST00000543248 | p.L185P | c.554  | 0.112985637 | 0     | 1 |
| 455 RPS13    | ENST00000525634 | p.I37M  | c.111  | 0.010124539 | 6.626 | 1 |
| 455 RPS13    | ENST00000525634 | p.K70T  | c.209  | 0.010124539 | 0     | 1 |
| 456 SYMPK    | ENST00000245934 | p.R346L | c.1037 | 0.019512965 | 6.328 | 1 |
| 456 SYMPK    | ENST00000245934 | p.D200N | c.598  | 0.050110778 | 4.538 | 1 |
| 456 SYMPK    | ENST00000245934 | p.P312L | c.935  | 0.055492815 | 0     | 1 |
| 457 CSF2RB   | ENST00000406230 | p.V173A | c.518  | 0.1504882   | 4.42  | 1 |
| 457 CSF2RB   | ENST00000406230 | p.A210T | c.628  | 2.097199088 | 0     | 2 |
| 457 CSF2RB   | ENST00000406230 | p.A210V | c.629  | 2.097199088 | 0     | 1 |
| 457 CSF2RB   | ENST00000406230 | p.P231L | c.692  | 0.153813506 | 4.308 | 1 |
| 458 RNF43    | ENST00000584437 | p.L82S  | c.245  | 0.010339535 | 7.645 | 1 |

|             |                 |         |             |             |       |   |
|-------------|-----------------|---------|-------------|-------------|-------|---|
| 458 RNF43   | ENST00000584437 | p.M83T  | c.248       | 0.002470468 | 8.661 | 1 |
| 458 RNF43   | ENST00000584437 | p.S85F  | c.254       | 0.00323056  | 8.274 | 1 |
| 458 RNF43   | ENST00000584437 | p.H86R  | c.257       | 0.001051016 | 9.894 | 1 |
| 458 RNF43   | ENST00000584437 | p.M173T | c.518       | 0.011748081 | 0     | 1 |
| 459 SI      | ENST00000264382 | p.T399N | c.1196      | 0.020554374 | 9.976 | 1 |
| 459 SI      | ENST00000264382 | p.Q495E | c.1483      | 0.028242273 | 6.146 | 1 |
| 459 SI      | ENST00000264382 | p.E496K | c.1486      | 0.13457958  | 4.225 | 1 |
| 459 SI      | ENST00000264382 | p.S145C | c.433       | 1.068588769 | 0     | 1 |
| 459 SI      | ENST00000264382 | p.S145N | c.434       | 1.068588769 | 0     | 1 |
| 460 DDX18   | ENST00000263239 | p.K348N | c.1044      | 0.015554891 | 0     | 1 |
| 460 DDX18   | ENST00000263239 | p.D373H | c.1117      | 0.009800017 | 6.673 | 1 |
| 460 DDX18   | ENST00000263239 | p.S378Y | c.1133      | 0.005754874 | 7.441 | 1 |
| 461 PKN2    | ENST00000370521 | p.L720F | c.2160      | 0.02335702  | 5.42  | 1 |
| 461 PKN2    | ENST00000370521 | p.L770S | c.2309      | 0.042080598 | 0     | 1 |
| 461 PKN2    | ENST00000370521 | p.A907V | c.2720      | 0.018723578 | 5.739 | 1 |
| 462 CPA1    | ENST00000011292 | p.Y344C | c.1031      | 0.108601875 | 7.017 | 1 |
| 462 CPA1    | ENST00000011292 | p.E380K | c.1138      | 0.154782231 | 2.914 | 1 |
| 462 CPA1    | ENST00000011292 | p.R382M | c.1144_1145 | 0.187436028 | 3.693 | 1 |
| 462 CPA1    | ENST00000011292 | p.H179R | c.536       | 0.012256898 | 9.444 | 1 |
| 462 CPA1    | ENST00000011292 | p.Q310H | c.930       | 0.219155393 | 0     | 1 |
| 463 NCAM2   | ENST00000400546 | p.D52Y  | c.154       | 0.191856801 | 3.402 | 1 |
| 463 NCAM2   | ENST00000400546 | p.P56S  | c.166       | 0.030346532 | 6.109 | 1 |
| 463 NCAM2   | ENST00000400546 | p.Q57L  | c.170       | 0.028432317 | 6.203 | 1 |
| 463 NCAM2   | ENST00000400546 | p.R92C  | c.274       | 1.122663123 | 0     | 1 |
| 463 NCAM2   | ENST00000400546 | p.R92H  | c.275       | 1.122663123 | 0     | 1 |
| 464 CSNK2A1 | ENST00000349736 | p.R191Q | c.572       | 0.258339536 | 9.63  | 1 |
| 464 CSNK2A1 | ENST00000349736 | p.R195Q | c.584       | 0.791206673 | 2.435 | 1 |
| 464 CSNK2A1 | ENST00000349736 | p.Y196C | c.587       | 0.318992091 | 4.738 | 1 |
| 464 CSNK2A1 | ENST00000349736 | p.G235A | c.704       | 0.478044383 | 4.783 | 1 |
| 464 CSNK2A1 | ENST00000349736 | p.H236R | c.707       | 2.292993575 | 0     | 3 |
| 464 CSNK2A1 | ENST00000349736 | p.I272M | c.816       | 0.03080394  | 6.692 | 1 |
| 464 CSNK2A1 | ENST00000349736 | p.R278Q | c.833       | 1.149449981 | 6.421 | 2 |
| 465 PDE9A   | ENST00000291539 | p.I392T | c.1175      | 0.014170161 | 0     | 1 |
| 465 PDE9A   | ENST00000291539 | p.R297W | c.889       | 0.014170161 | 6.141 | 1 |
| 466 PDCL2   | ENST00000295645 | p.H116N | c.346       | 0.050434604 | 0     | 1 |
| 466 PDCL2   | ENST00000295645 | p.F144C | c.431       | 0.010591128 | 6.561 | 1 |
| 466 PDCL2   | ENST00000295645 | p.V149M | c.445       | 0.012638771 | 6.306 | 1 |
| 466 PDCL2   | ENST00000295645 | p.F165C | c.494       | 0.027204705 | 5.2   | 1 |
| 467 NGB     | ENST00000298352 | p.E87D  | c.261       | 0.013489681 | 6.212 | 1 |
| 467 NGB     | ENST00000298352 | p.T108S | c.322       | 0.024946825 | 5.325 | 1 |
| 467 NGB     | ENST00000298352 | p.R146P | c.437       | 0.038436505 | 0     | 1 |
| 468 CA3     | ENST00000285381 | p.Y88F  | c.263       | 0.331022228 | 2.595 | 1 |
| 468 CA3     | ENST00000285381 | p.D138N | c.412       | 1.165511114 | 0     | 1 |
| 468 CA3     | ENST00000285381 | p.D138Y | c.412       | 1.165511114 | 0     | 1 |
| 469 TYMS    | ENST00000323274 | p.F80L  | c.238       | 0.022263292 | 5.639 | 1 |
| 469 TYMS    | ENST00000323274 | p.P277V | c.829_830   | 0.111619773 | 3.192 | 1 |
| 469 TYMS    | ENST00000323274 | p.Y301C | c.902       | 0.129491351 | 0     | 1 |
| 470 LDHB    | ENST00000396076 | p.A35S  | c.103       | 1.182676674 | 0     | 1 |
| 470 LDHB    | ENST00000396076 | p.A35T  | c.103       | 1.182676674 | 0     | 1 |

|             |                 |            |             |             |       |   |
|-------------|-----------------|------------|-------------|-------------|-------|---|
| 470 LDHB    | ENST00000396076 | p.V93A     | c.278       | 0.181949062 | 4.048 | 1 |
| 470 LDHB    | ENST00000396076 | p.K23R     | c.68        | 0.109124925 | 8.334 | 1 |
| 470 LDHB    | ENST00000396076 | p.A252T    | c.754       | 0.098827302 | 4.432 | 1 |
| 470 LDHB    | ENST00000396076 | p.I253V    | c.757       | 0.153364975 | 3.78  | 1 |
| 471 APBA1   | ENST00000265381 | p.R787W    | c.2359      | 1.221749076 | 0     | 1 |
| 471 APBA1   | ENST00000265381 | p.R787Q    | c.2360      | 1.221749076 | 0     | 1 |
| 471 APBA1   | ENST00000265381 | p.T819A    | c.2455      | 0.443498153 | 2.173 | 1 |
| 472 BAI3    | ENST00000370598 | p.R588P    | c.1763      | 3.135465746 | 0     | 1 |
| 472 BAI3    | ENST00000370598 | p.R588Q    | c.1763      | 3.135465746 | 0     | 3 |
| 472 BAI3    | ENST00000370598 | p.S634I    | c.1901      | 0.554093007 | 2.884 | 1 |
| 473 ADAMTS4 | ENST00000367996 | p.R343Q    | c.1028      | 0.005970221 | 7.388 | 1 |
| 473 ADAMTS4 | ENST00000367996 | p.R290C    | c.868       | 0.005970221 | 0     | 1 |
| 474 ADRB3   | ENST00000345060 | p.V74M     | c.220       | 0.12474034  | 0     | 1 |
| 474 ADRB3   | ENST00000345060 | p.R152H    | c.455       | 0.12474034  | 3.003 | 1 |
| 475 LEPR    | ENST00000349533 | p.G575I    | c.1723_1724 | 0.004506776 | 0     | 1 |
| 475 LEPR    | ENST00000349533 | p.P599R    | c.1796      | 0.002642282 | 8.564 | 1 |
| 475 LEPR    | ENST00000349533 | p.D602Y    | c.1804      | 0.001864494 | 9.067 | 1 |
| 476 CPN1    | ENST00000370418 | p.H366D    | c.1096      | 0.023402334 | 5.593 | 1 |
| 476 CPN1    | ENST00000370418 | p.N208S    | c.623       | 0.132272381 | 2.948 | 1 |
| 476 CPN1    | ENST00000370418 | p.N301S    | c.902       | 0.150305228 | 0     | 1 |
| 477 OXSR1   | ENST00000311806 | p.D449Y    | c.1345      | 0.010776257 | 6.536 | 1 |
| 477 OXSR1   | ENST00000311806 | p.S525N    | c.1574      | 0.010776257 | 0     | 1 |
| 478 A2M     | ENST00000318602 | p.P36S     | c.106       | 1.031532864 | 5.987 | 2 |
| 478 A2M     | ENST00000318602 | p.G632R    | c.1894      | 0.085733331 | 4.544 | 1 |
| 478 A2M     | ENST00000318602 | p.M121V    | c.361       | 1.074399529 | 0     | 1 |
| 478 A2M     | ENST00000318602 | p.M121I    | c.363       | 1.074399529 | 0     | 1 |
| 479 ANK1    | ENST00000396942 | p.F917L    | c.2751      | 0.013773127 | 7.182 | 1 |
| 479 ANK1    | ENST00000396942 | p.S925T    | c.2773      | 0.161828013 | 3.686 | 1 |
| 479 ANK1    | ENST00000396942 | p.P940Q    | c.2819      | 0.270815346 | 3.594 | 1 |
| 479 ANK1    | ENST00000396942 | p.L1033I   | c.3097      | 0.131352522 | 6.934 | 1 |
| 479 ANK1    | ENST00000396942 | p.M1036I   | c.3108      | 1.175574562 | 0     | 2 |
| 480 MUT     | ENST00000274813 | p.E334D    | c.1002      | 0.148547888 | 0     | 1 |
| 480 MUT     | ENST00000274813 | p.K89T     | c.266       | 0.148547888 | 2.751 | 1 |
| 481 SI      | ENST00000264382 | p.G447E    | c.1340      | 0.00675888  | 7.209 | 1 |
| 481 SI      | ENST00000264382 | p.N448K    | c.1344      | 0.019970303 | 5.646 | 1 |
| 481 SI      | ENST00000264382 | p.V473I    | c.1417      | 0.026729183 | 0     | 1 |
| 482 MGAM    | ENST00000475668 | p.P1236L   | c.3707      | 0.177912947 | 8.607 | 1 |
| 482 MGAM    | ENST00000475668 | p.P1240S   | c.3718      | 1.027650093 | 9.404 | 1 |
| 482 MGAM    | ENST00000475668 | p.P1240R   | c.3719      | 1.027650093 | 9.404 | 1 |
| 482 MGAM    | ENST00000475668 | p.LG1244FW | c.3732_3733 | 0.086164549 | 7.552 | 1 |
| 482 MGAM    | ENST00000475668 | p.G1517D   | c.4550      | 0.171365328 | 9.975 | 1 |
| 482 MGAM    | ENST00000475668 | p.G1521R   | c.4561      | 1.123562357 | 0     | 1 |
| 482 MGAM    | ENST00000475668 | p.G1521A   | c.4562      | 1.123562357 | 0     | 1 |
| 482 MGAM    | ENST00000475668 | p.Y2447F   | c.7340      | 0.330426489 | 3.162 | 1 |
| 483 KCNMA1  | ENST00000404771 | p.S562N    | c.1685      | 0.015374357 | 6.188 | 1 |
| 483 KCNMA1  | ENST00000404771 | p.L945F    | c.2835      | 0.122567932 | 3.048 | 1 |
| 483 KCNMA1  | ENST00000404771 | p.D980N    | c.2938      | 0.134625507 | 0     | 1 |
| 484 ICAM1   | ENST00000264832 | p.L146H    | c.437       | 0.008490116 | 0     | 1 |
| 484 ICAM1   | ENST00000264832 | p.E201Q    | c.601       | 0.008490116 | 6.88  | 1 |

|              |                 |          |           |             |       |   |
|--------------|-----------------|----------|-----------|-------------|-------|---|
| 485 PGAM1    | ENST00000334828 | p.R86H   | c.257     | 0.098030937 | 3.389 | 1 |
| 485 PGAM1    | ENST00000334828 | p.R90W   | c.268     | 0.035213841 | 5.213 | 1 |
| 485 PGAM1    | ENST00000334828 | p.Q149E  | c.445     | 0.122418011 | 0     | 1 |
| 486 OXCT1    | ENST00000196371 | p.Q517H  | c.1551    | 0.072980413 | 0     | 1 |
| 486 OXCT1    | ENST00000196371 | p.V301L  | c.901     | 0.006040987 | 7.371 | 1 |
| 486 OXCT1    | ENST00000196371 | p.R308G  | c.922     | 0.066939426 | 3.901 | 1 |
| 487 P2RY1    | ENST00000305097 | p.R128M  | c.383     | 0.096194369 | 3.417 | 1 |
| 487 P2RY1    | ENST00000305097 | p.L187H  | c.560     | 0.121092545 | 0     | 1 |
| 487 P2RY1    | ENST00000305097 | p.R212Q  | c.635     | 0.030041797 | 5.186 | 1 |
| 488 FADD     | ENST00000301838 | p.G58W   | c.172     | 0.090684513 | 0     | 1 |
| 488 FADD     | ENST00000301838 | p.A91V   | c.272     | 0.090684513 | 3.463 | 1 |
| 489 ACVR1    | ENST00000409283 | p.S339I  | c.1016    | 0.328119864 | 3.798 | 1 |
| 489 ACVR1    | ENST00000409283 | p.N341I  | c.1022    | 0.139580971 | 5.2   | 1 |
| 489 ACVR1    | ENST00000409283 | p.R375C  | c.1123    | 1.043871722 | 9.787 | 2 |
| 489 ACVR1    | ENST00000409283 | p.E413Q  | c.1237    | 0.208600969 | 6.253 | 1 |
| 489 ACVR1    | ENST00000409283 | p.S290L  | c.869     | 1.114473521 | 0     | 2 |
| 490 IL1R1    | ENST00000410023 | p.V227A  | c.680     | 0.127523894 | 0     | 1 |
| 490 IL1R1    | ENST00000410023 | p.S290C  | c.868     | 0.012324147 | 6.491 | 1 |
| 490 IL1R1    | ENST00000410023 | p.K315R  | c.944     | 0.007888682 | 6.986 | 1 |
| 490 IL1R1    | ENST00000410023 | p.D321N  | c.961     | 0.109723992 | 3.204 | 1 |
| 491 MAP2K1   | ENST00000307102 | p.R47Q   | c.140     | 0.231426535 | 5.902 | 1 |
| 491 MAP2K1   | ENST00000307102 | p.N122D  | c.364     | 0.394980667 | 9.478 | 1 |
| 491 MAP2K1   | ENST00000307102 | p.P124S  | c.370     | 6.390594297 | 0     | 6 |
| 491 MAP2K1   | ENST00000307102 | p.P124L  | c.370_371 | 6.390594297 | 0     | 1 |
| 491 MAP2K1   | ENST00000307102 | p.E203K  | c.607     | 4.575116579 | 3.762 | 4 |
| 491 MAP2K1   | ENST00000307102 | p.E203V  | c.608     | 4.575116579 | 3.762 | 1 |
| 491 MAP2K1   | ENST00000307102 | p.E333A  | c.998     | 0.394005011 | 7.995 | 1 |
| 492 MAPK10   | ENST00000359221 | p.A366V  | c.1097    | 0.016630784 | 0     | 1 |
| 492 MAPK10   | ENST00000359221 | p.K121E  | c.361     | 0.016630784 | 5.91  | 1 |
| 493 FAS      | ENST00000355740 | p.D228N  | c.682     | 0.024482601 | 0     | 1 |
| 493 FAS      | ENST00000355740 | p.A290V  | c.869     | 0.019736363 | 5.663 | 1 |
| 493 FAS      | ENST00000355740 | p.I318N  | c.953     | 0.01104376  | 7.719 | 1 |
| 494 RYR2     | ENST00000360064 | p.R415P  | c.1244    | 0.133667132 | 4.919 | 1 |
| 494 RYR2     | ENST00000360064 | p.R418W  | c.1252    | 0.324700502 | 3.508 | 1 |
| 494 RYR2     | ENST00000360064 | p.R296C  | c.886     | 1.143881006 | 0     | 2 |
| 494 RYR2     | ENST00000360064 | p.V298A  | c.893     | 0.250042964 | 6.379 | 1 |
| 495 NOXO1    | ENST00000397280 | p.V69I   | c.205     | 0.107992273 | 0     | 1 |
| 495 NOXO1    | ENST00000397280 | p.A109T  | c.325     | 0.107992273 | 3.211 | 1 |
| 496 SERPINE2 | ENST00000409304 | p.R374G  | c.1120    | 0.125869828 | 0     | 1 |
| 496 SERPINE2 | ENST00000409304 | p.F207V  | c.619     | 0.108500545 | 3.232 | 1 |
| 496 SERPINE2 | ENST00000409304 | p.A210T  | c.628     | 0.01025815  | 6.753 | 1 |
| 496 SERPINE2 | ENST00000409304 | p.A256T  | c.766     | 0.011248796 | 6.62  | 1 |
| 497 JMJD1C   | ENST00000399262 | p.M2201I | c.6603    | 0.116749413 | 0     | 1 |
| 497 JMJD1C   | ENST00000399262 | p.R2277K | c.6830    | 0.021166179 | 6.372 | 1 |
| 497 JMJD1C   | ENST00000399262 | p.S2284C | c.6850    | 0.105939625 | 3.256 | 1 |
| 498 SETD3    | ENST00000331768 | p.R125Q  | c.374     | 0.194502279 | 0     | 1 |
| 498 SETD3    | ENST00000331768 | p.P259S  | c.775     | 0.171800156 | 2.58  | 1 |
| 498 SETD3    | ENST00000331768 | p.T267A  | c.799     | 0.031820546 | 5.197 | 1 |
| 499 RPL10L   | ENST00000298283 | p.E56D   | c.168     | 0.315773608 | 3.248 | 1 |

|            |                 |                    |           |             |       |   |
|------------|-----------------|--------------------|-----------|-------------|-------|---|
| 499 RPL10L | ENST00000298283 | p.Q59H             | c.177     | 0.034001151 | 9.799 | 1 |
| 499 RPL10L | ENST00000298283 | p.R162C            | c.484     | 2.106380423 | 0     | 1 |
| 499 RPL10L | ENST00000298283 | p.R162S            | c.484     | 2.106380423 | 0     | 1 |
| 499 RPL10L | ENST00000298283 | p.R162L            | c.485     | 2.106380423 | 0     | 1 |
| 500 CASP8  | ENST00000358485 | p.G387R            | c.1159    | 0.066707834 | 3.906 | 1 |
| 500 CASP8  | ENST00000358485 | p.R307W            | c.919     | 0.066707834 | 0     | 1 |
| 501 DAAM1  | ENST00000351081 | p.R691W            | c.2071    | 0.093557687 | 3.418 | 1 |
| 501 DAAM1  | ENST00000351081 | p.V817A            | c.2450    | 0.004316268 | 7.856 | 1 |
| 501 DAAM1  | ENST00000351081 | p.K842E            | c.2524    | 0.097873954 | 0     | 1 |
| 502 ACTB   | ENST00000331789 | p.F200V            | c.598     | 0.001584233 | 0     | 1 |
| 502 ACTB   | ENST00000331789 | p.G268S            | c.802_801 | 0.001584233 | 9.302 | 1 |
| 503 PDE1C  | ENST00000396193 | p.M412I            | c.1236    | 0.063344389 | 4.075 | 1 |
| 503 PDE1C  | ENST00000396193 | p.A427D            | c.1280    | 0.071602679 | 3.887 | 1 |
| 503 PDE1C  | ENST00000396193 | p.M505I            | c.1515    | 0.126926055 | 0     | 1 |
| 504 CHAT   | ENST00000337653 | p.V506E            | c.1517    | 0.017960857 | 0     | 1 |
| 504 CHAT   | ENST00000337653 | p.H697Q            | c.2091    | 0.017960857 | 5.799 | 1 |
| 505 IGF1R  | ENST00000268035 | p.E94K             | c.280     | 0.010401966 | 6.587 | 1 |
| 505 IGF1R  | ENST00000268035 | p.L149H            | c.446     | 0.020352571 | 0     | 1 |
| 505 IGF1R  | ENST00000268035 | p.P175L            | c.524     | 0.009950605 | 6.651 | 1 |
| 506 STAT1  | ENST00000409465 | p.V426I            | c.1276    | 0.010026765 | 6.64  | 1 |
| 506 STAT1  | ENST00000409465 | p.Q463E            | c.1387    | 0.016354917 | 0     | 1 |
| 506 STAT1  | ENST00000409465 | p.W555C            | c.1665    | 0.006328152 | 7.304 | 1 |
| 507 PKM    | ENST00000319622 | p.H464R            | c.1391    | 0.02511316  | 6.65  | 1 |
| 507 PKM    | ENST00000319622 | p.L465M            | c.1393    | 0.106153842 | 4.044 | 1 |
| 507 PKM    | ENST00000319622 | p.K266N            | c.798     | 0.211994432 | 0     | 1 |
| 507 PKM    | ENST00000319622 | p.S287I            | c.860     | 0.202101185 | 2.822 | 1 |
| 508 PC     | ENST00000393958 | p.I704V            | c.2110    | 0.117604786 | 6.37  | 1 |
| 508 PC     | ENST00000393958 | p.E728K            | c.2182    | 0.171149052 | 0     | 1 |
| 508 PC     | ENST00000393958 | p.I740M            | c.2220    | 0.102405173 | 9.742 | 1 |
| 508 PC     | ENST00000393958 | p.R762C            | c.2284    | 0.159799864 | 2.663 | 1 |
| 509 ACD    | ENST00000393919 | p.P112L            | c.335     | 0.361733721 | 3.467 | 1 |
| 509 ACD    | ENST00000393919 | p.L184in_frame_del | c.553_551 | 3.09043343  | 0     | 4 |
| 510 API5   | ENST00000531273 | p.P229F            | c.685_686 | 0.0096584   | 0     | 1 |
| 510 API5   | ENST00000531273 | p.G271R            | c.811     | 0.0096584   | 6.694 | 1 |
| 511 KDM6B  | ENST00000254846 | p.R1194W           | c.3580    | 0.162875397 | 0     | 1 |
| 511 KDM6B  | ENST00000254846 | p.L1218M           | c.3652    | 0.015217893 | 7.004 | 1 |
| 511 KDM6B  | ENST00000254846 | p.E1346K           | c.4036    | 0.090343458 | 3.567 | 1 |
| 511 KDM6B  | ENST00000254846 | p.A1352V           | c.4055    | 0.076673238 | 3.822 | 1 |
| 512 ERBB4  | ENST00000342788 | p.I771T            | c.2312    | 0.086858047 | 6.801 | 1 |
| 512 ERBB4  | ENST00000342788 | p.V840I            | c.2518    | 1.075926161 | 0     | 2 |
| 512 ERBB4  | ENST00000342788 | p.R842Q            | c.2525    | 0.249171031 | 8.694 | 1 |
| 512 ERBB4  | ENST00000342788 | p.F862L            | c.2586    | 0.19002541  | 4.661 | 1 |
| 512 ERBB4  | ENST00000342788 | p.Y875F            | c.2624    | 0.161810751 | 5.321 | 1 |
| 513 KLRK1  | ENST00000540818 | p.Q112H            | c.336     | 0.006782346 | 7.204 | 1 |
| 513 KLRK1  | ENST00000540818 | p.H153Y            | c.457     | 0.065747236 | 0     | 1 |
| 513 KLRK1  | ENST00000540818 | p.A193V            | c.578     | 0.058964891 | 4.084 | 1 |
| 514 GRM7   | ENST00000467425 | p.M418I            | c.1254    | 0.12548209  | 3.6   | 1 |
| 514 GRM7   | ENST00000467425 | p.F457L            | c.1371    | 0.112797861 | 9.479 | 1 |
| 514 GRM7   | ENST00000467425 | p.G52K             | c.154_155 | 0.208710927 | 3.241 | 1 |

|             |                 |                     |             |             |       |   |
|-------------|-----------------|---------------------|-------------|-------------|-------|---|
| 514 GRM7    | ENST00000467425 | p.F122L             | c.366       | 0.168660794 | 3.692 | 1 |
| 514 GRM7    | ENST00000467425 | p.V153A             | c.458       | 0.26701478  | 0     | 1 |
| 515 SPOP    | ENST00000503676 | p.R45W              | c.133       | 0.042877303 | 9.255 | 1 |
| 515 SPOP    | ENST00000503676 | p.E47A              | c.140       | 0.065909832 | 8.61  | 1 |
| 515 SPOP    | ENST00000503676 | p.E50K              | c.148       | 2.049727278 | 0     | 3 |
| 515 SPOP    | ENST00000503676 | p.G75L              | c.224_223   | 0.240047779 | 4.457 | 1 |
| 516 CASP8   | ENST00000358485 | p.D362G             | c.1085      | 1.395897091 | 0     | 1 |
| 516 CASP8   | ENST00000358485 | p.D362V             | c.1085      | 1.395897091 | 0     | 1 |
| 516 CASP8   | ENST00000358485 | p.D367G             | c.1100      | 0.809996105 | 5.429 | 1 |
| 516 CASP8   | ENST00000358485 | p.S397C             | c.1190      | 0.324589755 | 3.191 | 1 |
| 516 CASP8   | ENST00000358485 | p.P411H             | c.1232      | 0.725860955 | 2.749 | 1 |
| 516 CASP8   | ENST00000358485 | p.K412T             | c.1235      | 0.144797607 | 4.681 | 1 |
| 516 CASP8   | ENST00000358485 | p.P453L             | c.1358      | 0.111991267 | 6.901 | 1 |
| 516 CASP8   | ENST00000358485 | p.Y285F             | c.854       | 0.180215199 | 6.106 | 1 |
| 516 CASP8   | ENST00000358485 | p.M287T             | c.860       | 0.390902667 | 6.25  | 1 |
| 516 CASP8   | ENST00000358485 | p.R292W             | c.874       | 1.374498952 | 8.013 | 1 |
| 516 CASP8   | ENST00000358485 | p.R292Q             | c.875       | 1.374498952 | 8.013 | 1 |
| 516 CASP8   | ENST00000358485 | p.C295Y             | c.884       | 0.20215798  | 5.167 | 1 |
| 516 CASP8   | ENST00000358485 | p.TT331in_frame_del | c.987_992   | 0.145910601 | 8.022 | 1 |
| 517 ITGAX   | ENST00000562522 | p.R520H             | c.1559      | 1.029033322 | 0     | 2 |
| 517 ITGAX   | ENST00000562522 | p.R550Q             | c.1649      | 0.10266142  | 5.683 | 1 |
| 517 ITGAX   | ENST00000562522 | p.A552V             | c.1655      | 0.07688399  | 6.873 | 1 |
| 517 ITGAX   | ENST00000562522 | p.G574D             | c.1721      | 0.102566479 | 9.913 | 1 |
| 518 USP7    | ENST00000344836 | p.H683Y             | c.2047      | 0.037369369 | 4.742 | 1 |
| 518 USP7    | ENST00000344836 | p.S710F             | c.2129      | 0.056552739 | 0     | 1 |
| 518 USP7    | ENST00000344836 | p.V751M             | c.2251      | 0.01918337  | 5.704 | 1 |
| 519 CES1    | ENST00000360526 | p.S186N             | c.557       | 0.01801223  | 9.603 | 1 |
| 519 CES1    | ENST00000360526 | p.R187W             | c.559       | 3.139313356 | 0     | 2 |
| 519 CES1    | ENST00000360526 | p.R187L             | c.560       | 3.139313356 | 0     | 2 |
| 519 CES1    | ENST00000360526 | p.V323L             | c.967       | 0.416378867 | 3.323 | 1 |
| 519 CES1    | ENST00000360526 | p.G326A             | c.977       | 0.156214229 | 4.714 | 1 |
| 520 DNPEP   | ENST00000523282 | p.F480in_frame_del  | c.1439_1437 | 0.059375024 | 0     | 1 |
| 520 DNPEP   | ENST00000523282 | p.A293V             | c.878       | 0.059375024 | 4.074 | 1 |
| 521 RAB3D   | ENST00000589655 | p.D68G              | c.203       | 0.075467537 | 4.728 | 1 |
| 521 RAB3D   | ENST00000589655 | p.D20N              | c.58        | 1.037733768 | 0     | 2 |
| 522 DCX     | ENST00000338081 | p.E53K              | c.157       | 0.252438671 | 9.901 | 1 |
| 522 DCX     | ENST00000338081 | p.R120Q             | c.359       | 0.258702651 | 7.903 | 1 |
| 522 DCX     | ENST00000338081 | p.R159C             | c.475       | 1.005223847 | 0     | 1 |
| 522 DCX     | ENST00000338081 | p.R159H             | c.476       | 1.005223847 | 0     | 1 |
| 523 MTHFD1  | ENST00000545908 | p.E276G             | c.827       | 0.069156085 | 0     | 1 |
| 523 MTHFD1  | ENST00000545908 | p.V309L             | c.925       | 0.069156085 | 3.854 | 1 |
| 524 EPHA7   | ENST00000369303 | p.Q809H             | c.2427      | 0.052884912 | 0     | 1 |
| 524 EPHA7   | ENST00000369303 | p.E850Q             | c.2548      | 0.052884912 | 4.241 | 1 |
| 525 NFASC   | ENST00000367172 | p.P337L             | c.1010      | 0.081197277 | 4.787 | 1 |
| 525 NFASC   | ENST00000367172 | p.N363Y             | c.1087      | 0.1217033   | 3.484 | 1 |
| 525 NFASC   | ENST00000367172 | p.E413K             | c.1237      | 0.029025075 | 9.67  | 1 |
| 525 NFASC   | ENST00000367172 | p.H414Y             | c.1240      | 0.126823362 | 0     | 1 |
| 526 KIR3DL1 | ENST00000541392 | p.L133Q             | c.398       | 0.027393929 | 0     | 1 |
| 526 KIR3DL1 | ENST00000541392 | p.S256F             | c.767       | 0.027393929 | 5.19  | 1 |



|              |                 |          |        |             |       |   |
|--------------|-----------------|----------|--------|-------------|-------|---|
| 527 ZADH2    | ENST00000322342 | p.G168V  | c.503  | 0.184593242 | 3.456 | 1 |
| 527 ZADH2    | ENST00000322342 | p.R265C  | c.793  | 1.116827191 | 0     | 2 |
| 527 ZADH2    | ENST00000322342 | p.V300I  | c.898  | 0.053745199 | 5.282 | 1 |
| 528 ADH4     | ENST00000508393 | p.P50S   | c.148  | 0.056654292 | 4.269 | 1 |
| 528 ADH4     | ENST00000508393 | p.T156N  | c.467  | 0.013153611 | 7.15  | 1 |
| 528 ADH4     | ENST00000508393 | p.V26F   | c.76   | 0.058909431 | 0     | 1 |
| 529 RNASEH2A | ENST00000221486 | p.A92T   | c.274  | 0.025032034 | 0     | 1 |
| 529 RNASEH2A | ENST00000221486 | p.A128T  | c.382  | 0.012216713 | 6.355 | 1 |
| 529 RNASEH2A | ENST00000221486 | p.V133M  | c.397  | 0.0079221   | 8.367 | 1 |
| 529 RNASEH2A | ENST00000221486 | p.A178T  | c.532  | 0.009786441 | 6.675 | 1 |
| 530 PARP12   | ENST00000263549 | p.F627L  | c.1879 | 0.082305002 | 0     | 1 |
| 530 PARP12   | ENST00000263549 | p.S656F  | c.1967 | 0.018362928 | 5.858 | 1 |
| 530 PARP12   | ENST00000263549 | p.P658L  | c.1973 | 0.066185626 | 3.942 | 1 |
| 531 SERPINA1 | ENST00000448921 | p.V357M  | c.1069 | 0.131787814 | 3.148 | 1 |
| 531 SERPINA1 | ENST00000448921 | p.S89F   | c.266  | 0.051126343 | 4.444 | 1 |
| 531 SERPINA1 | ENST00000448921 | p.V209A  | c.626  | 0.160311883 | 0     | 1 |
| 531 SERPINA1 | ENST00000448921 | p.V326I  | c.976  | 0.015348172 | 9.328 | 1 |
| 532 BTN3A2   | ENST00000377708 | p.G161R  | c.481  | 0.101390894 | 0     | 1 |
| 532 BTN3A2   | ENST00000377708 | p.M210I  | c.630  | 0.101390894 | 3.302 | 1 |
| 533 KLRD1    | ENST00000381908 | p.S76F   | c.227  | 0.122302614 | 3.06  | 1 |
| 533 KLRD1    | ENST00000381908 | p.I118F  | c.352  | 0.035197882 | 5.646 | 1 |
| 533 KLRD1    | ENST00000381908 | p.R172C  | c.514  | 0.139878317 | 0     | 1 |
| 534 CDK4     | ENST00000257904 | p.V174G  | c.521  | 0.084027187 | 0     | 1 |
| 534 CDK4     | ENST00000257904 | p.G216E  | c.647  | 0.084027187 | 3.573 | 1 |
| 535 TRMT10A  | ENST00000273962 | p.V97I   | c.289  | 0.011998604 | 7.436 | 1 |
| 535 TRMT10A  | ENST00000273962 | p.S99N   | c.296  | 0.163919615 | 2.798 | 1 |
| 535 TRMT10A  | ENST00000273962 | p.H111Y  | c.331  | 0.114088034 | 3.397 | 1 |
| 535 TRMT10A  | ENST00000273962 | p.Q140H  | c.420  | 0.244490821 | 0     | 1 |
| 536 CFB      | ENST00000556679 | p.D1049N | c.3145 | 0.063952915 | 0     | 1 |
| 536 CFB      | ENST00000556679 | p.K1150N | c.3450 | 0.009881871 | 6.661 | 1 |
| 536 CFB      | ENST00000556679 | p.G1152E | c.3455 | 0.054071043 | 4.209 | 1 |
| 537 CASP2    | ENST00000310447 | p.G383V  | c.1148 | 0.006820059 | 7.196 | 1 |
| 537 CASP2    | ENST00000310447 | p.R219C  | c.655  | 0.013330631 | 0     | 1 |
| 537 CASP2    | ENST00000310447 | p.Y284F  | c.851  | 0.006510572 | 7.263 | 1 |
| 538 GPI      | ENST00000588991 | p.S175F  | c.524  | 0.141702913 | 0     | 1 |
| 538 GPI      | ENST00000588991 | p.A224T  | c.670  | 0.128796924 | 2.978 | 1 |
| 538 GPI      | ENST00000588991 | p.R288C  | c.862  | 0.037914107 | 6.08  | 1 |
| 539 VAT1L    | ENST00000302536 | p.E336K  | c.1006 | 0.008449022 | 6.887 | 1 |
| 539 VAT1L    | ENST00000302536 | p.A168S  | c.502  | 0.008449022 | 0     | 1 |
| 540 LTF      | ENST00000231751 | p.A67S   | c.199  | 0.159729933 | 6.052 | 1 |
| 540 LTF      | ENST00000231751 | p.G80D   | c.239  | 0.369925982 | 0     | 1 |
| 540 LTF      | ENST00000231751 | p.E85K   | c.253  | 0.105118549 | 8.676 | 1 |
| 540 LTF      | ENST00000231751 | p.R139H  | c.416  | 0.156321218 | 5.357 | 1 |
| 540 LTF      | ENST00000231751 | p.T141I  | c.422  | 0.224194926 | 3.036 | 1 |
| 540 LTF      | ENST00000231751 | p.G143R  | c.427  | 0.053834833 | 4.746 | 1 |
| 540 LTF      | ENST00000231751 | p.A273V  | c.818  | 0.354285993 | 2.577 | 1 |
| 540 LTF      | ENST00000231751 | p.D316Y  | c.946  | 0.115729298 | 9.661 | 1 |
| 541 MGAM     | ENST00000475668 | p.R384H  | c.1151 | 0.085143303 | 5.42  | 1 |
| 541 MGAM     | ENST00000475668 | p.A412V  | c.1235 | 0.08998214  | 0     | 1 |

|              |                 |                       |             |             |       |   |
|--------------|-----------------|-----------------------|-------------|-------------|-------|---|
| 541 MGAM     | ENST00000475668 | p.F433L               | c.1297      | 0.084628061 | 3.933 | 1 |
| 541 MGAM     | ENST00000475668 | p.Q520L               | c.1559      | 0.018781959 | 9.759 | 1 |
| 542 MAPK9    | ENST00000343111 | p.A340V               | c.1019      | 0.008531411 | 0     | 1 |
| 542 MAPK9    | ENST00000343111 | p.R72C                | c.214       | 0.008531411 | 6.873 | 1 |
| 543 METTL21A | ENST00000406927 | p.D144N               | c.430       | 0.152960012 | 4.146 | 1 |
| 543 METTL21A | ENST00000406927 | p.I145M               | c.435       | 0.03937738  | 6.963 | 1 |
| 543 METTL21A | ENST00000406927 | p.C173Y               | c.518       | 0.059303775 | 9.012 | 1 |
| 543 METTL21A | ENST00000406927 | p.R174Q               | c.521       | 1.071825075 | 0     | 2 |
| 543 METTL21A | ENST00000406927 | p.E201K               | c.601       | 0.017043298 | 7.536 | 1 |
| 544 TBK1     | ENST00000331710 | p.F56C                | c.167       | 0.013881195 | 6.289 | 1 |
| 544 TBK1     | ENST00000331710 | p.L59F                | c.177       | 0.08652933  | 3.549 | 1 |
| 544 TBK1     | ENST00000331710 | p.F158C               | c.473       | 0.098225297 | 0     | 1 |
| 545 CDKL2    | ENST00000307465 | p.E130D               | c.390       | 0.125607978 | 0     | 1 |
| 545 CDKL2    | ENST00000307465 | p.S14G                | c.40        | 0.125607978 | 2.993 | 1 |
| 546 TBX1     | ENST00000332710 | p.Y172C               | c.515       | 0.009500719 | 0     | 1 |
| 546 TBX1     | ENST00000332710 | p.R236I               | c.707       | 0.006841757 | 8.151 | 1 |
| 546 TBX1     | ENST00000332710 | p.V273F               | c.817       | 0.009306335 | 7.385 | 1 |
| 547 CA13     | ENST00000321764 | p.P14S                | c.40        | 0.118860268 | 4.189 | 1 |
| 547 CA13     | ENST00000321764 | p.Y195D               | c.583       | 0.232013964 | 5.318 | 1 |
| 547 CA13     | ENST00000321764 | p.P196S               | c.586       | 0.042222973 | 7.92  | 1 |
| 547 CA13     | ENST00000321764 | p.R247C               | c.739       | 1.226915277 | 0     | 2 |
| 547 CA13     | ENST00000321764 | p.S30F                | c.89        | 0.497948468 | 2.807 | 1 |
| 548 IL1A     | ENST00000263339 | p.R185K               | c.554       | 0.060429391 | 5.924 | 1 |
| 548 IL1A     | ENST00000263339 | p.P208S               | c.622       | 1.016470178 | 0     | 1 |
| 548 IL1A     | ENST00000263339 | p.P208R               | c.623       | 1.016470178 | 0     | 1 |
| 549 FYN      | ENST00000368667 | p.F353L               | c.1059      | 0.135045847 | 0     | 1 |
| 549 FYN      | ENST00000368667 | p.R392Q               | c.1175      | 0.063326398 | 4.087 | 1 |
| 549 FYN      | ENST00000368667 | p.E458K               | c.1372      | 0.080687437 | 3.714 | 1 |
| 550 XDH      | ENST00000379416 | p.R830C               | c.2488      | 0.023650262 | 0     | 1 |
| 550 XDH      | ENST00000379416 | p.R1223H              | c.3668      | 0.023650262 | 5.402 | 1 |
| 551 ERBB3    | ENST00000267101 | p.T355A               | c.1063      | 1.295043586 | 0     | 1 |
| 551 ERBB3    | ENST00000267101 | p.T355I               | c.1064      | 1.295043586 | 0     | 1 |
| 551 ERBB3    | ENST00000267101 | p.K329E               | c.985       | 1.295043586 | 2.761 | 1 |
| 551 ERBB3    | ENST00000267101 | p.K329T               | c.986       | 1.295043586 | 2.761 | 1 |
| 552 ACAA1    | ENST00000333167 | p.ITLL388in_frame_del | c.1174_1163 | 0.012850782 | 0     | 1 |
| 552 ACAA1    | ENST00000333167 | p.G217V               | c.650       | 0.012850782 | 6.282 | 1 |
| 553 OCRL     | ENST00000371113 | p.E470K               | c.1408      | 0.011621983 | 0     | 1 |
| 553 OCRL     | ENST00000371113 | p.N512K               | c.1536      | 0.011621983 | 6.427 | 1 |
| 554 HK3      | ENST00000292432 | p.E484K               | c.1450      | 0.005410584 | 7.53  | 1 |
| 554 HK3      | ENST00000292432 | p.A488S               | c.1462      | 0.007688938 | 7.023 | 1 |
| 554 HK3      | ENST00000292432 | p.P489L               | c.1466      | 0.006920059 | 7.175 | 1 |
| 554 HK3      | ENST00000292432 | p.A831D               | c.2492      | 0.02001958  | 0     | 1 |
| 555 C5       | ENST00000223642 | p.L126I               | c.376       | 0.097260647 | 3.362 | 1 |
| 555 C5       | ENST00000223642 | p.S147L               | c.440       | 0.097260647 | 0     | 1 |
| 556 GLS      | ENST00000320717 | p.N494K               | c.1482      | 0.066459571 | 0     | 1 |
| 556 GLS      | ENST00000320717 | p.R543Q               | c.1628      | 0.015799251 | 5.984 | 1 |
| 556 GLS      | ENST00000320717 | p.K218T               | c.653       | 0.05066032  | 4.303 | 1 |
| 557 HPN      | ENST00000392226 | p.D352N               | c.1054      | 0.029850328 | 0     | 1 |
| 557 HPN      | ENST00000392226 | p.S376I               | c.1127      | 0.013830528 | 6.176 | 1 |

|             |                 |           |           |             |       |   |
|-------------|-----------------|-----------|-----------|-------------|-------|---|
| 557 HPN     | ENST00000392226 | p.G190R   | c.568     | 0.016019801 | 5.964 | 1 |
| 558 ACADSB  | ENST00000358776 | p.K69N    | c.207     | 0.010467059 | 6.578 | 1 |
| 558 ACADSB  | ENST00000358776 | p.K130N   | c.390     | 0.010467059 | 0     | 1 |
| 559 STARD13 | ENST00000336934 | p.G71A    | c.212     | 0.005531935 | 0     | 1 |
| 559 STARD13 | ENST00000336934 | p.E99K    | c.295     | 0.005531935 | 7.498 | 1 |
| 560 SEC24A  | ENST00000398844 | p.H821N   | c.2461    | 0.012700244 | 6.299 | 1 |
| 560 SEC24A  | ENST00000398844 | p.R879H   | c.2636    | 0.012700244 | 0     | 1 |
| 561 POT1    | ENST00000357628 | p.QP157HS | c.472_471 | 0.142694338 | 0     | 1 |
| 561 POT1    | ENST00000357628 | p.T246S   | c.736     | 0.142694338 | 2.809 | 1 |
| 562 CUTC    | ENST00000370476 | p.R104C   | c.310     | 1.094952668 | 0     | 2 |
| 562 CUTC    | ENST00000370476 | p.I136S   | c.407     | 0.179617522 | 3.477 | 1 |
| 562 CUTC    | ENST00000370476 | p.R138G   | c.412     | 0.006863308 | 8.963 | 1 |
| 562 CUTC    | ENST00000370476 | p.L140V   | c.418     | 0.006280086 | 8.315 | 1 |
| 563 IFNL3   | ENST00000413851 | p.E61K    | c.181     | 0.086085115 | 5.057 | 1 |
| 563 IFNL3   | ENST00000413851 | p.C69W    | c.207     | 0.099697389 | 3.369 | 1 |
| 563 IFNL3   | ENST00000413851 | p.R180H   | c.539     | 0.127947952 | 0     | 1 |
| 563 IFNL3   | ENST00000413851 | p.T183M   | c.548     | 0.03835875  | 9.804 | 1 |
| 564 GBE1    | ENST00000429644 | p.M587I   | c.1761    | 1.003199362 | 0     | 2 |
| 564 GBE1    | ENST00000429644 | p.L621R   | c.1862    | 0.006398724 | 8.288 | 1 |
| 565 MAGEA4  | ENST00000393920 | p.E157K   | c.469     | 0.066155275 | 4.918 | 1 |
| 565 MAGEA4  | ENST00000393920 | p.R299C   | c.895     | 1.033077637 | 0     | 1 |
| 565 MAGEA4  | ENST00000393920 | p.R299H   | c.896     | 1.033077637 | 0     | 1 |
| 566 GATA3   | ENST00000379328 | p.M369I   | c.1107    | 0.044531086 | 4.53  | 1 |
| 566 GATA3   | ENST00000379328 | p.G279S   | c.835     | 0.072080427 | 0     | 1 |
| 566 GATA3   | ENST00000379328 | p.R313K   | c.938     | 0.030042171 | 5.118 | 1 |
| 567 EPHB2   | ENST00000400191 | p.A731T   | c.2191    | 0.11444986  | 5.794 | 1 |
| 567 EPHB2   | ENST00000400191 | p.G874S   | c.2620    | 1.019408115 | 0     | 2 |
| 567 EPHB2   | ENST00000400191 | p.I876M   | c.2628    | 0.108465089 | 9.496 | 1 |
| 568 VRK3    | ENST00000594948 | p.R220W   | c.658     | 0.145406448 | 3.548 | 1 |
| 568 VRK3    | ENST00000594948 | p.E301D   | c.903     | 0.175939305 | 3.03  | 1 |
| 568 VRK3    | ENST00000594948 | p.R332C   | c.994     | 0.207923494 | 0     | 1 |
| 569 FANCM   | ENST00000267430 | p.E1826K  | c.5476    | 0.160536797 | 2.648 | 1 |
| 569 FANCM   | ENST00000267430 | p.I1834M  | c.5502    | 0.02489436  | 7.58  | 1 |
| 569 FANCM   | ENST00000267430 | p.R1865M  | c.5594    | 0.171008406 | 0     | 1 |
| 569 FANCM   | ENST00000267430 | p.A1942T  | c.5824    | 0.026904812 | 7.324 | 1 |
| 570 PRDM9   | ENST00000296682 | p.Y276N   | c.826     | 0.190583237 | 7.487 | 1 |
| 570 PRDM9   | ENST00000296682 | p.R279Q   | c.836     | 2.102491873 | 0     | 3 |
| 570 PRDM9   | ENST00000296682 | p.E303D   | c.909     | 0.018072783 | 7.375 | 1 |
| 570 PRDM9   | ENST00000296682 | p.V305E   | c.914     | 0.319385625 | 3.609 | 1 |
| 570 PRDM9   | ENST00000296682 | p.D309N   | c.925     | 0.062808999 | 6.806 | 1 |
| 571 SCIN    | ENST00000297029 | p.R402H   | c.1205    | 0.137547326 | 2.862 | 1 |
| 571 SCIN    | ENST00000297029 | p.D423G   | c.1268    | 0.138566065 | 0     | 1 |
| 571 SCIN    | ENST00000297029 | p.G476D   | c.1427    | 0.004990063 | 9.939 | 1 |
| 572 IL8     | ENST00000307407 | p.Q35E    | c.103     | 0.353448979 | 2.657 | 1 |
| 572 IL8     | ENST00000307407 | p.A62T    | c.184     | 1.38782282  | 0     | 1 |
| 572 IL8     | ENST00000307407 | p.A62V    | c.185     | 1.38782282  | 0     | 1 |
| 572 IL8     | ENST00000307407 | p.L32H    | c.95      | 0.416247255 | 2.401 | 1 |
| 572 IL8     | ENST00000307407 | p.R33K    | c.98      | 0.093775836 | 4.646 | 1 |
| 573 IL3RA   | ENST00000331035 | p.E108D   | c.324     | 0.015084588 | 7.318 | 1 |

|            |                 |          |        |             |       |   |
|------------|-----------------|----------|--------|-------------|-------|---|
| 573 IL3RA  | ENST00000331035 | p.T111I  | c.332  | 0.019394428 | 7.326 | 1 |
| 573 IL3RA  | ENST00000331035 | p.R162H  | c.485  | 1.012499425 | 0     | 2 |
| 574 ADH7   | ENST00000476959 | p.S197F  | c.590  | 0.067637427 | 7.204 | 1 |
| 574 ADH7   | ENST00000476959 | p.P211L  | c.632  | 0.077623063 | 3.861 | 1 |
| 574 ADH7   | ENST00000476959 | p.A300P  | c.898  | 0.203495879 | 0     | 1 |
| 574 ADH7   | ENST00000476959 | p.D324N  | c.970  | 0.18972564  | 2.967 | 1 |
| 575 NAE1   | ENST00000359087 | p.C124Y  | c.371  | 0.069492447 | 0     | 1 |
| 575 NAE1   | ENST00000359087 | p.S149P  | c.445  | 0.069492447 | 3.847 | 1 |
| 576 FN1    | ENST00000354785 | p.R1375H | c.4124 | 0.2018467   | 5.062 | 1 |
| 576 FN1    | ENST00000354785 | p.R1392C | c.4174 | 1.295975723 | 0     | 1 |
| 576 FN1    | ENST00000354785 | p.R1392H | c.4175 | 1.295975723 | 0     | 1 |
| 576 FN1    | ENST00000354785 | p.Y1393C | c.4178 | 0.197256286 | 5.098 | 1 |
| 576 FN1    | ENST00000354785 | p.V1426A | c.4277 | 0.723358133 | 2.078 | 1 |
| 577 GIMAP1 | ENST00000307194 | p.E79K   | c.235  | 0.581685979 | 2.827 | 1 |
| 577 GIMAP1 | ENST00000307194 | p.A109T  | c.325  | 0.035623805 | 8.624 | 1 |
| 577 GIMAP1 | ENST00000307194 | p.R28W   | c.82   | 3.143459698 | 0     | 2 |
| 577 GIMAP1 | ENST00000307194 | p.R28Q   | c.83   | 3.143459698 | 0     | 2 |
| 578 DPP4   | ENST00000360534 | p.D545Y  | c.1633 | 0.35502684  | 2.494 | 1 |
| 578 DPP4   | ENST00000360534 | p.S577T  | c.1730 | 1.17751342  | 0     | 1 |
| 578 DPP4   | ENST00000360534 | p.S577R  | c.1731 | 1.17751342  | 0     | 1 |
| 579 CD1D   | ENST00000368171 | p.T42K   | c.125  | 0.018736782 | 6.745 | 1 |
| 579 CD1D   | ENST00000368171 | p.V99M   | c.295  | 0.025907673 | 0     | 1 |
| 579 CD1D   | ENST00000368171 | p.L157P  | c.470  | 0.016584738 | 5.914 | 1 |
| 580 XYLB   | ENST00000207870 | p.D85N   | c.253  | 0.022576822 | 5.954 | 1 |
| 580 XYLB   | ENST00000207870 | p.F86I   | c.256  | 0.255818661 | 2.379 | 1 |
| 580 XYLB   | ENST00000207870 | p.S87F   | c.260  | 0.250532009 | 2.27  | 1 |
| 580 XYLB   | ENST00000207870 | p.F204S  | c.611  | 0.066420063 | 7.979 | 1 |
| 580 XYLB   | ENST00000207870 | p.P269S  | c.805  | 0.419667243 | 0     | 1 |
| 581 ACOT12 | ENST00000307624 | p.D95Y   | c.283  | 0.011735312 | 6.413 | 1 |
| 581 ACOT12 | ENST00000307624 | p.S218I  | c.653  | 0.011735312 | 0     | 1 |
| 583 AHCYL2 | ENST00000325006 | p.C232Y  | c.695  | 0.03036799  | 0     | 1 |
| 583 AHCYL2 | ENST00000325006 | p.C292Y  | c.875  | 0.008660556 | 7.829 | 1 |
| 583 AHCYL2 | ENST00000325006 | p.G311A  | c.932  | 0.025970183 | 5.267 | 1 |
| 584 LHCGR  | ENST00000294954 | p.L204R  | c.611  | 0.124521901 | 9.806 | 1 |
| 584 LHCGR  | ENST00000294954 | p.E206K  | c.616  | 2.011060831 | 0     | 3 |
| 584 LHCGR  | ENST00000294954 | p.D228N  | c.682  | 0.222702844 | 6.652 | 1 |
| 585 MAP2K4 | ENST00000415385 | p.R145W  | c.433  | 1.04254823  | 6.634 | 2 |
| 585 MAP2K4 | ENST00000415385 | p.V148M  | c.442  | 0.246758315 | 3.142 | 1 |
| 585 MAP2K4 | ENST00000415385 | p.E152K  | c.454  | 0.138742895 | 3.929 | 1 |
| 585 MAP2K4 | ENST00000415385 | p.G263R  | c.787  | 0.055388502 | 9.719 | 1 |
| 585 MAP2K4 | ENST00000415385 | p.S268F  | c.803  | 1.200259189 | 0     | 2 |
| 586 NUDT14 | ENST00000392568 | p.Y142N  | c.424  | 0.022204563 | 0     | 1 |
| 586 NUDT14 | ENST00000392568 | p.G203S  | c.607  | 0.022204563 | 5.493 | 1 |
| 587 EXOG   | ENST00000287675 | p.R89W   | c.265  | 0.025934206 | 5.269 | 1 |
| 587 EXOG   | ENST00000287675 | p.P198H  | c.593  | 0.014884969 | 6.07  | 1 |
| 587 EXOG   | ENST00000287675 | p.A223V  | c.668  | 0.040819175 | 0     | 1 |
| 588 DCC    | ENST00000442544 | p.G457R  | c.1369 | 0.097934703 | 3.457 | 1 |
| 588 DCC    | ENST00000442544 | p.Q460E  | c.1378 | 0.082339795 | 3.728 | 1 |
| 588 DCC    | ENST00000442544 | p.E507K  | c.1519 | 0.166529982 | 0     | 1 |

|             |                 |                    |           |             |       |   |
|-------------|-----------------|--------------------|-----------|-------------|-------|---|
| 589 PKP2    | ENST00000070846 | p.H477Y            | c.1429    | 0.015197734 | 0     | 1 |
| 589 PKP2    | ENST00000070846 | p.T521A            | c.1561    | 0.015197734 | 6.04  | 1 |
| 590 ATL1    | ENST00000441560 | p.R63T             | c.188     | 0.029584801 | 5.079 | 1 |
| 590 ATL1    | ENST00000441560 | p.G324D            | c.971     | 0.029584801 | 0     | 1 |
| 591 NPR3    | ENST00000265074 | p.Y138H            | c.412     | 2.11657318  | 0     | 3 |
| 591 NPR3    | ENST00000265074 | p.L209P            | c.626     | 0.358080501 | 3.119 | 1 |
| 591 NPR3    | ENST00000265074 | p.D237Y            | c.709     | 0.037289974 | 9.41  | 1 |
| 592 NONO    | ENST00000276079 | p.R153Q            | c.458     | 0.095898694 | 0     | 1 |
| 592 NONO    | ENST00000276079 | p.V222G            | c.665     | 0.087838669 | 3.509 | 1 |
| 592 NONO    | ENST00000276079 | p.R293H            | c.878     | 0.008060025 | 6.955 | 1 |
| 593 GMDS    | ENST00000380815 | p.E169K            | c.505     | 0.007060568 | 7.146 | 1 |
| 593 GMDS    | ENST00000380815 | p.E269D            | c.807     | 0.007060568 | 0     | 1 |
| 594 TLR4    | ENST00000355622 | p.S102G            | c.304     | 0.10305136  | 3.419 | 1 |
| 594 TLR4    | ENST00000355622 | p.S126L            | c.377     | 0.195730617 | 0     | 1 |
| 594 TLR4    | ENST00000355622 | p.T151Y            | c.451_452 | 0.111796258 | 3.29  | 1 |
| 595 APCS    | ENST00000255040 | p.S121L            | c.362     | 1.035476316 | 0     | 2 |
| 595 APCS    | ENST00000255040 | p.P31S             | c.91      | 0.086266685 | 4.817 | 1 |
| 596 HIBADH  | ENST00000265395 | p.P137S            | c.409     | 0.00994371  | 6.652 | 1 |
| 596 HIBADH  | ENST00000265395 | p.P158S            | c.472     | 0.101096931 | 3.373 | 1 |
| 596 HIBADH  | ENST00000265395 | p.G205R            | c.613     | 0.106465602 | 0     | 1 |
| 597 FASLG   | ENST00000367721 | p.E185K            | c.553     | 0.068004416 | 4.048 | 1 |
| 597 FASLG   | ENST00000367721 | p.G187R            | c.559     | 0.02742225  | 5.652 | 1 |
| 597 FASLG   | ENST00000367721 | p.K217T            | c.650     | 0.03854369  | 5.596 | 1 |
| 597 FASLG   | ENST00000367721 | p.S253R            | c.759     | 0.101016745 | 0     | 1 |
| 598 NCF2    | ENST00000367535 | p.D88N             | c.262     | 1.170400326 | 0     | 1 |
| 598 NCF2    | ENST00000367535 | p.D88Y             | c.262     | 1.170400326 | 0     | 1 |
| 598 NCF2    | ENST00000367535 | p.K134in_frame_del | c.402_400 | 0.340800652 | 2.553 | 1 |
| 599 LMAN1   | ENST00000251047 | p.E107D            | c.321     | 0.100142207 | 0     | 1 |
| 599 LMAN1   | ENST00000251047 | p.K224T            | c.671     | 0.024980508 | 5.43  | 1 |
| 599 LMAN1   | ENST00000251047 | p.S261F            | c.782     | 0.078731353 | 3.7   | 1 |
| 600 HBD     | ENST00000380299 | p.E8K              | c.22      | 0.040134869 | 4.639 | 1 |
| 600 HBD     | ENST00000380299 | p.H78Y             | c.232     | 0.040134869 | 0     | 1 |
| 601 TPST2   | ENST00000403880 | p.P69S             | c.205     | 0.00526628  | 0     | 1 |
| 601 TPST2   | ENST00000403880 | p.A152G            | c.455     | 0.00526628  | 7.569 | 1 |
| 602 ARHGEF1 | ENST00000599846 | p.A108V            | c.323     | 0.007099829 | 0     | 1 |
| 602 ARHGEF1 | ENST00000599846 | p.A217V            | c.650     | 0.007099829 | 7.138 | 1 |
| 603 ANGPT1  | ENST00000517746 | p.G465R            | c.1393    | 0.020389391 | 7.201 | 1 |
| 603 ANGPT1  | ENST00000517746 | p.R487C            | c.1459    | 2.124318239 | 0     | 1 |
| 603 ANGPT1  | ENST00000517746 | p.R487H            | c.1460    | 2.124318239 | 0     | 2 |
| 603 ANGPT1  | ENST00000517746 | p.R330C            | c.988     | 1.209835367 | 4.089 | 2 |
| 604 GH1     | ENST00000323322 | p.P87R             | c.260     | 0.027527168 | 0     | 1 |
| 604 GH1     | ENST00000323322 | p.I205M            | c.615     | 0.027527168 | 5.183 | 1 |
| 605 PPFIA2  | ENST00000549396 | p.E1027K           | c.3079    | 0.030142187 | 5.108 | 1 |
| 605 PPFIA2  | ENST00000549396 | p.W1028R           | c.3082    | 0.043437678 | 4.661 | 1 |
| 605 PPFIA2  | ENST00000549396 | p.P1030A           | c.3088    | 0.008104843 | 6.947 | 1 |
| 605 PPFIA2  | ENST00000549396 | p.R1095W           | c.3283    | 0.076628375 | 0     | 1 |
| 606 RNASE2  | ENST00000304625 | p.M54V             | c.160     | 0.02881222  | 0     | 1 |
| 606 RNASE2  | ENST00000304625 | p.R124T            | c.371     | 0.015854102 | 5.979 | 1 |
| 606 RNASE2  | ENST00000304625 | p.A126E            | c.377     | 0.012958118 | 6.27  | 1 |

|              |                 |          |        |             |       |   |
|--------------|-----------------|----------|--------|-------------|-------|---|
| 607 TBC1D20  | ENST00000461304 | p.R67Q   | c.200  | 0.006364413 | 7.984 | 1 |
| 607 TBC1D20  | ENST00000461304 | p.D240H  | c.718  | 0.008281065 | 0     | 1 |
| 607 TBC1D20  | ENST00000461304 | p.E289G  | c.866  | 0.004331253 | 7.851 | 1 |
| 608 KAL1     | ENST00000262648 | p.V303I  | c.907  | 2           | 0     | 2 |
| 608 KAL1     | ENST00000262648 | p.V303A  | c.908  | 2           | 0     | 1 |
| 609 ADH4     | ENST00000508393 | p.S218L  | c.653  | 0.049583365 | 0     | 1 |
| 609 ADH4     | ENST00000508393 | p.G240E  | c.719  | 0.049583365 | 4.334 | 1 |
| 610 RRM1     | ENST00000300738 | p.F463Y  | c.1388 | 0.008572906 | 0     | 1 |
| 610 RRM1     | ENST00000300738 | p.E533D  | c.1599 | 0.008572906 | 6.866 | 1 |
| 611 ITGA2B   | ENST00000262407 | p.P443S  | c.1327 | 0.122938871 | 8.626 | 1 |
| 611 ITGA2B   | ENST00000262407 | p.P45H   | c.134  | 0.184186583 | 0     | 1 |
| 611 ITGA2B   | ENST00000262407 | p.A473T  | c.1417 | 0.144741287 | 5.572 | 1 |
| 611 ITGA2B   | ENST00000262407 | p.F85L   | c.253  | 0.180366761 | 2.666 | 1 |
| 611 ITGA2B   | ENST00000262407 | p.L124M  | c.370  | 0.022562811 | 8.347 | 1 |
| 612 MRE11A   | ENST00000407439 | p.Q51H   | c.153  | 0.001487391 | 9.393 | 1 |
| 612 MRE11A   | ENST00000407439 | p.E54K   | c.160  | 0.010449967 | 7.161 | 1 |
| 612 MRE11A   | ENST00000407439 | p.D56Y   | c.166  | 0.051316995 | 4.733 | 1 |
| 612 MRE11A   | ENST00000407439 | p.I18L   | c.52   | 0.163148243 | 0     | 1 |
| 612 MRE11A   | ENST00000407439 | p.G288C  | c.862  | 0.091643785 | 3.544 | 1 |
| 612 MRE11A   | ENST00000407439 | p.R291H  | c.872  | 0.044566321 | 4.996 | 1 |
| 613 NEO1     | ENST00000339362 | p.Y473C  | c.1418 | 0.140925052 | 0     | 1 |
| 613 NEO1     | ENST00000339362 | p.E495D  | c.1485 | 0.140925052 | 2.827 | 1 |
| 614 LRBA     | ENST00000357115 | p.H2304P | c.6911 | 0.086789665 | 0     | 1 |
| 614 LRBA     | ENST00000357115 | p.D2356Y | c.7066 | 0.030028558 | 6.045 | 1 |
| 614 LRBA     | ENST00000357115 | p.F2444L | c.7332 | 0.083774186 | 3.803 | 1 |
| 615 CUTC     | ENST00000370476 | p.F89Y   | c.266  | 0.001249009 | 9.645 | 1 |
| 615 CUTC     | ENST00000370476 | p.R207I  | c.620  | 0.003452842 | 8.178 | 1 |
| 615 CUTC     | ENST00000370476 | p.R236Q  | c.707  | 0.004701851 | 0     | 1 |
| 616 CHIT1    | ENST00000367229 | p.G216C  | c.646  | 1.086197057 | 0     | 1 |
| 616 CHIT1    | ENST00000367229 | p.G216D  | c.647  | 1.086197057 | 0     | 1 |
| 616 CHIT1    | ENST00000367229 | p.R269C  | c.805  | 0.343477277 | 3.799 | 1 |
| 616 CHIT1    | ENST00000367229 | p.E297K  | c.889  | 0.049370215 | 8.524 | 1 |
| 616 CHIT1    | ENST00000367229 | p.W331G  | c.991  | 0.081605767 | 7.77  | 1 |
| 616 CHIT1    | ENST00000367229 | p.V332E  | c.995  | 0.122296626 | 7.147 | 1 |
| 617 SETD6    | ENST00000219315 | p.R338H  | c.1013 | 0.008178205 | 6.934 | 1 |
| 617 SETD6    | ENST00000219315 | p.T370I  | c.1109 | 0.026749344 | 0     | 1 |
| 617 SETD6    | ENST00000219315 | p.E396K  | c.1186 | 0.009665097 | 6.693 | 1 |
| 617 SETD6    | ENST00000219315 | p.W412C  | c.1236 | 0.008906041 | 6.811 | 1 |
| 618 MAPK9    | ENST00000343111 | p.H143L  | c.428  | 0.160182365 | 5.884 | 1 |
| 618 MAPK9    | ENST00000343111 | p.A193V  | c.578  | 0.09424664  | 7.787 | 1 |
| 618 MAPK9    | ENST00000343111 | p.E195V  | c.584  | 0.212244016 | 6.587 | 1 |
| 618 MAPK9    | ENST00000343111 | p.E204K  | c.610  | 0.140646839 | 8.883 | 1 |
| 618 MAPK9    | ENST00000343111 | p.V206M  | c.616  | 1.102279631 | 0     | 1 |
| 618 MAPK9    | ENST00000343111 | p.V206M  | c.616  | 1.102279631 | 0     | 1 |
| 618 MAPK9    | ENST00000343111 | p.R309Q  | c.926  | 0.381389688 | 3.872 | 1 |
| 619 SERPINB2 | ENST00000457692 | p.A390T  | c.1168 | 0.109095794 | 3.324 | 1 |
| 619 SERPINB2 | ENST00000457692 | p.M235I  | c.705  | 0.101765136 | 3.434 | 1 |
| 619 SERPINB2 | ENST00000457692 | p.P310A  | c.928  | 0.192382321 | 0     | 1 |
| 620 NAGK     | ENST00000455662 | p.A209T  | c.625  | 0.002939935 | 8.41  | 1 |

|     |          |                 |                        |             |             |       |    |
|-----|----------|-----------------|------------------------|-------------|-------------|-------|----|
| 620 | NAGK     | ENST00000455662 | p.Y279H                | c.835       | 0.002939935 | 0     | 1  |
| 621 | SMAD4    | ENST00000342988 | p.D355G                | c.1064      | 0.695975198 | 6.069 | 1  |
| 621 | SMAD4    | ENST00000342988 | p.P356L                | c.1067      | 0.24808786  | 8.724 | 1  |
| 621 | SMAD4    | ENST00000342988 | p.RFLCG361in_frame_del | c.1080_1094 | 17.70598522 | 0     | 1  |
| 621 | SMAD4    | ENST00000342988 | p.R361C                | c.1081      | 17.70598522 | 0     | 5  |
| 621 | SMAD4    | ENST00000342988 | p.R361S                | c.1081      | 17.70598522 | 0     | 1  |
| 621 | SMAD4    | ENST00000342988 | p.R361H                | c.1082      | 17.70598522 | 0     | 10 |
| 621 | SMAD4    | ENST00000342988 | p.R361P                | c.1082      | 17.70598522 | 0     | 1  |
| 621 | SMAD4    | ENST00000342988 | p.D537Y                | c.1609      | 6.20480619  | 2.538 | 1  |
| 621 | SMAD4    | ENST00000342988 | p.D537G                | c.1610      | 6.20480619  | 2.538 | 1  |
| 621 | SMAD4    | ENST00000342988 | p.D537V                | c.1610      | 6.20480619  | 2.538 | 1  |
| 621 | SMAD4    | ENST00000342988 | p.D537E                | c.1611      | 6.20480619  | 2.538 | 1  |
| 622 | CTNNA1   | ENST00000302763 | p.R496C                | c.1486      | 0.017124498 | 9.468 | 1  |
| 622 | CTNNA1   | ENST00000302763 | p.D503N                | c.1507      | 0.166216596 | 0     | 1  |
| 622 | CTNNA1   | ENST00000302763 | p.R551Q                | c.1652      | 0.162635358 | 2.725 | 1  |
| 622 | CTNNA1   | ENST00000302763 | p.S558L                | c.1673      | 0.029816297 | 6.205 | 1  |
| 623 | SERPINE2 | ENST00000409304 | p.N96in_frame_del      | c.290_288   | 0.017974167 | 7.849 | 1  |
| 623 | SERPINE2 | ENST00000409304 | p.A113S                | c.337       | 0.070450986 | 3.939 | 1  |
| 623 | SERPINE2 | ENST00000409304 | p.V114M                | c.340       | 0.106705232 | 3.634 | 1  |
| 623 | SERPINE2 | ENST00000409304 | p.C136Y                | c.407       | 0.151768837 | 0     | 1  |
| 623 | SERPINE2 | ENST00000409304 | p.I327M                | c.981       | 0.036067672 | 9.214 | 1  |
| 624 | TLR5     | ENST00000366881 | p.S354L                | c.1061      | 0.027406697 | 0     | 1  |
| 624 | TLR5     | ENST00000366881 | p.D377N                | c.1129      | 0.008355837 | 6.903 | 1  |
| 624 | TLR5     | ENST00000366881 | p.A328T                | c.982       | 0.019050861 | 5.714 | 1  |
| 625 | SELE     | ENST00000333360 | p.A136T                | c.406       | 0.135747732 | 0     | 1  |
| 625 | SELE     | ENST00000333360 | p.S27C                 | c.80        | 0.135747732 | 2.881 | 1  |
| 626 | GRM3     | ENST00000361669 | p.R352W                | c.1054      | 2.314721489 | 0     | 1  |
| 626 | GRM3     | ENST00000361669 | p.R352L                | c.1055      | 2.314721489 | 0     | 1  |
| 626 | GRM3     | ENST00000361669 | p.R352Q                | c.1055      | 2.314721489 | 0     | 1  |
| 626 | GRM3     | ENST00000361669 | p.S388Y                | c.1163      | 0.080429222 | 8.667 | 1  |
| 626 | GRM3     | ENST00000361669 | p.F45Y                 | c.134       | 0.32751148  | 3.942 | 1  |
| 626 | GRM3     | ENST00000361669 | p.G58R                 | c.172       | 0.641666088 | 2.275 | 1  |
| 626 | GRM3     | ENST00000361669 | p.G65R                 | c.193       | 0.183235895 | 4.892 | 1  |
| 626 | GRM3     | ENST00000361669 | p.L96S                 | c.287       | 0.23578991  | 7.178 | 1  |
| 627 | SLC2A5   | ENST00000377424 | p.N423S                | c.1268      | 0.033261568 | 4.91  | 1  |
| 627 | SLC2A5   | ENST00000377424 | p.V75M                 | c.223       | 0.033261568 | 0     | 1  |
| 628 | REG1A    | ENST00000233735 | p.R54C                 | c.160       | 0.167166656 | 0     | 1  |
| 628 | REG1A    | ENST00000233735 | p.F158L                | c.474       | 0.105113562 | 3.346 | 1  |
| 628 | REG1A    | ENST00000233735 | p.S159Y                | c.476       | 0.075589607 | 3.861 | 1  |
| 629 | SYT1     | ENST00000393240 | p.R400Q                | c.1199      | 0.216184583 | 0     | 1  |
| 629 | SYT1     | ENST00000393240 | p.S280F                | c.839       | 0.043845085 | 4.749 | 1  |
| 629 | SYT1     | ENST00000393240 | p.R282C                | c.844       | 0.185652687 | 2.482 | 1  |
| 630 | INPP5E   | ENST00000371712 | p.Q400H                | c.1200      | 0.009638337 | 0     | 1  |
| 630 | INPP5E   | ENST00000371712 | p.R468H                | c.1403      | 0.009638337 | 6.697 | 1  |
| 631 | HDC      | ENST00000267845 | p.S354G                | c.1060      | 0.084956145 | 3.74  | 1  |
| 631 | HDC      | ENST00000267845 | p.R358C                | c.1072      | 0.075707786 | 6.283 | 1  |
| 631 | HDC      | ENST00000267845 | p.T149M                | c.446       | 0.222817908 | 0     | 1  |
| 631 | HDC      | ENST00000267845 | p.C313S                | c.937       | 0.055998929 | 5.868 | 1  |
| 631 | HDC      | ENST00000267845 | p.T314P                | c.940       | 0.148876296 | 3.083 | 1  |

|             |                 |         |        |             |       |   |
|-------------|-----------------|---------|--------|-------------|-------|---|
| 632 CPB1    | ENST00000282957 | p.R178K | c.533  | 0.15361059  | 0     | 1 |
| 632 CPB1    | ENST00000282957 | p.R231Q | c.692  | 0.135128769 | 2.918 | 1 |
| 632 CPB1    | ENST00000282957 | p.H304Y | c.910  | 0.024118261 | 5.553 | 1 |
| 633 CD180   | ENST00000256447 | p.D381N | c.1141 | 0.031371573 | 7.879 | 1 |
| 633 CD180   | ENST00000256447 | p.T430P | c.1288 | 1.109445931 | 0     | 1 |
| 633 CD180   | ENST00000256447 | p.T430I | c.1289 | 1.109445931 | 0     | 1 |
| 633 CD180   | ENST00000256447 | p.C455R | c.1363 | 0.242514073 | 3.279 | 1 |
| 633 CD180   | ENST00000256447 | p.G478E | c.1433 | 0.02549359  | 8.843 | 1 |
| 634 KIR3DL1 | ENST00000541392 | p.R41Q  | c.122  | 0.256301738 | 3.029 | 1 |
| 634 KIR3DL1 | ENST00000541392 | p.G42E  | c.125  | 0.016911823 | 6.273 | 1 |
| 634 KIR3DL1 | ENST00000541392 | p.T118P | c.352  | 0.385327019 | 0     | 1 |
| 634 KIR3DL1 | ENST00000541392 | p.G119E | c.356  | 0.281146596 | 6.294 | 1 |
| 634 KIR3DL1 | ENST00000541392 | p.P124T | c.370  | 0.183109426 | 7.315 | 1 |
| 634 KIR3DL1 | ENST00000541392 | p.Y196D | c.586  | 0.215192912 | 3.366 | 1 |
| 634 KIR3DL1 | ENST00000541392 | p.G197S | c.589  | 0.077490714 | 7.411 | 1 |
| 634 KIR3DL1 | ENST00000541392 | p.L206M | c.616  | 0.228450636 | 3.501 | 1 |
| 634 KIR3DL1 | ENST00000541392 | p.P209H | c.626  | 0.129226396 | 4.656 | 1 |
| 635 MAP2K6  | ENST00000590474 | p.D99N  | c.295  | 0.038821509 | 4.687 | 1 |
| 635 MAP2K6  | ENST00000590474 | p.F111I | c.331  | 0.017474014 | 6.871 | 1 |
| 635 MAP2K6  | ENST00000590474 | p.D197N | c.589  | 0.047364755 | 0     | 1 |
| 636 TARS    | ENST00000265112 | p.G341V | c.1022 | 0.122219029 | 0     | 1 |
| 636 TARS    | ENST00000265112 | p.G451A | c.1352 | 0.036988458 | 5.547 | 1 |
| 636 TARS    | ENST00000265112 | p.R457K | c.1370 | 0.102986858 | 3.31  | 1 |
| 637 KPNB1   | ENST00000540627 | p.L407F | c.1221 | 0.149047709 | 0     | 1 |
| 637 KPNB1   | ENST00000540627 | p.I458M | c.1374 | 0.085586471 | 3.821 | 1 |
| 637 KPNB1   | ENST00000540627 | p.V461M | c.1381 | 0.090940815 | 3.675 | 1 |
| 638 CDC25A  | ENST00000302506 | p.V408A | c.1223 | 0.318640157 | 2.65  | 1 |
| 638 CDC25A  | ENST00000302506 | p.R443W | c.1327 | 1.159320078 | 0     | 1 |
| 638 CDC25A  | ENST00000302506 | p.R443Q | c.1328 | 1.159320078 | 0     | 1 |
| 639 DPYSL2  | ENST00000311151 | p.V166M | c.496  | 0.021448194 | 5.543 | 1 |
| 639 DPYSL2  | ENST00000311151 | p.A199T | c.595  | 0.021448194 | 0     | 1 |
| 640 FSHR    | ENST00000406846 | p.S67L  | c.200  | 0.085200163 | 3.553 | 1 |
| 640 FSHR    | ENST00000406846 | p.D89H  | c.265  | 0.102430511 | 0     | 1 |
| 640 FSHR    | ENST00000406846 | p.Y110H | c.328  | 0.016037311 | 7.075 | 1 |
| 640 FSHR    | ENST00000406846 | p.K140M | c.419  | 0.009813612 | 6.671 | 1 |
| 641 PDE1B   | ENST00000243052 | p.S249L | c.746  | 0.03453014  | 4.856 | 1 |
| 641 PDE1B   | ENST00000243052 | p.E322K | c.964  | 0.03453014  | 0     | 1 |
| 642 EPB41   | ENST00000373798 | p.E124K | c.370  | 0.02551547  | 0     | 1 |
| 642 EPB41   | ENST00000373798 | p.Q159E | c.475  | 0.014558444 | 6.102 | 1 |
| 642 EPB41   | ENST00000373798 | p.G173E | c.518  | 0.010957025 | 6.512 | 1 |
| 643 IFNB1   | ENST00000380232 | p.H118R | c.353  | 0.102715422 | 0     | 1 |
| 643 IFNB1   | ENST00000380232 | p.H142P | c.425  | 0.082123884 | 3.638 | 1 |
| 643 IFNB1   | ENST00000380232 | p.R145I | c.434  | 0.024188513 | 5.481 | 1 |
| 644 NTRK3   | ENST00000360948 | p.R535M | c.1604 | 0.05105762  | 5.915 | 1 |
| 644 NTRK3   | ENST00000360948 | p.D609N | c.1825 | 1.016573246 | 0     | 2 |
| 645 PLCB3   | ENST00000279230 | p.R359H | c.1076 | 0.075170052 | 0     | 1 |
| 645 PLCB3   | ENST00000279230 | p.P405A | c.1213 | 0.044543381 | 4.524 | 1 |
| 645 PLCB3   | ENST00000279230 | p.L410I | c.1228 | 0.025887192 | 5.333 | 1 |
| 645 PLCB3   | ENST00000279230 | p.S411F | c.1232 | 0.013224269 | 7.18  | 1 |



|             |                 |          |        |             |       |   |
|-------------|-----------------|----------|--------|-------------|-------|---|
| 646 ACE     | ENST00000290866 | p.D365H  | c.1093 | 0.040960233 | 5.661 | 1 |
| 646 ACE     | ENST00000290866 | p.R410W  | c.1228 | 1.092257471 | 0     | 1 |
| 646 ACE     | ENST00000290866 | p.R410L  | c.1229 | 1.092257471 | 0     | 1 |
| 646 ACE     | ENST00000290866 | p.S449N  | c.1346 | 0.156329512 | 3.786 | 1 |
| 647 SARS    | ENST00000369923 | p.A186V  | c.557  | 0.017998244 | 6.796 | 1 |
| 647 SARS    | ENST00000369923 | p.P226L  | c.677  | 1.008999122 | 0     | 2 |
| 648 CLTC    | ENST00000269122 | p.R350T  | c.1049 | 0.114546081 | 0     | 1 |
| 648 CLTC    | ENST00000269122 | p.D286V  | c.857  | 0.114546081 | 3.126 | 1 |
| 649 CAMKMT  | ENST00000378494 | p.D226N  | c.676  | 0.244246388 | 5.602 | 1 |
| 649 CAMKMT  | ENST00000378494 | p.M229V  | c.685  | 0.051296351 | 5.285 | 1 |
| 649 CAMKMT  | ENST00000378494 | p.G255R  | c.763  | 0.116241616 | 8.899 | 1 |
| 649 CAMKMT  | ENST00000378494 | p.A257V  | c.770  | 1.048331684 | 0     | 2 |
| 651 SEPSECS | ENST00000382103 | p.M179I  | c.537  | 0.007998804 | 6.966 | 1 |
| 651 SEPSECS | ENST00000382103 | p.A182T  | c.544  | 0.012700244 | 6.299 | 1 |
| 651 SEPSECS | ENST00000382103 | p.L218M  | c.652  | 0.020699048 | 0     | 1 |
| 652 GRIA2   | ENST00000296526 | p.E377V  | c.1130 | 0.100267544 | 3.501 | 1 |
| 652 GRIA2   | ENST00000296526 | p.L378I  | c.1132 | 0.147124787 | 2.887 | 1 |
| 652 GRIA2   | ENST00000296526 | p.V257D  | c.770  | 0.223511448 | 0     | 1 |
| 653 PIK3CG  | ENST00000496166 | p.V937A  | c.2810 | 0.14806553  | 5.763 | 1 |
| 653 PIK3CG  | ENST00000496166 | p.Y1017H | c.3049 | 0.119821887 | 9.114 | 1 |
| 653 PIK3CG  | ENST00000496166 | p.L1018V | c.3052 | 1.02021941  | 0     | 2 |
| 654 SEC24C  | ENST00000345254 | p.V510I  | c.1528 | 0.009024108 | 6.792 | 1 |
| 654 SEC24C  | ENST00000345254 | p.R516M  | c.1547 | 0.005380664 | 7.538 | 1 |
| 654 SEC24C  | ENST00000345254 | p.R613M  | c.1838 | 0.014404772 | 0     | 1 |
| 655 TNFSF10 | ENST00000241261 | p.S186F  | c.557  | 0.118339204 | 0     | 1 |
| 655 TNFSF10 | ENST00000241261 | p.I242F  | c.724  | 0.118339204 | 3.079 | 1 |
| 656 CTDSPL  | ENST00000273179 | p.E98K   | c.292  | 0.068440779 | 0     | 1 |
| 656 CTDSPL  | ENST00000273179 | p.R213W  | c.637  | 0.068440779 | 3.869 | 1 |
| 657 DPYS    | ENST00000351513 | p.N195I  | c.584  | 0.094666645 | 0     | 1 |
| 657 DPYS    | ENST00000351513 | p.V225A  | c.674  | 0.094666645 | 3.401 | 1 |
| 658 NKTR    | ENST00000232978 | p.N38D   | c.112  | 0.104024842 | 0     | 1 |
| 658 NKTR    | ENST00000232978 | p.S88L   | c.263  | 0.104024842 | 3.265 | 1 |
| 659 ALDH3A1 | ENST00000444455 | p.S369I  | c.1106 | 0.07889544  | 3.767 | 1 |
| 659 ALDH3A1 | ENST00000444455 | p.L433V  | c.1297 | 0.147523069 | 0     | 1 |
| 659 ALDH3A1 | ENST00000444455 | p.R231H  | c.692  | 0.079508968 | 3.755 | 1 |
| 660 EPHA2   | ENST00000358432 | p.T647M  | c.1940 | 0.050906723 | 4.296 | 1 |
| 660 EPHA2   | ENST00000358432 | p.P687L  | c.2060 | 0.050906723 | 0     | 1 |
| 661 TRPV2   | ENST00000338560 | p.Y270H  | c.808  | 0.032061817 | 4.963 | 1 |
| 661 TRPV2   | ENST00000338560 | p.R316Q  | c.947  | 0.032061817 | 0     | 1 |
| 662 IL7R    | ENST00000303115 | p.S44I   | c.131  | 0.040639839 | 9.251 | 1 |
| 662 IL7R    | ENST00000303115 | p.Q45H   | c.135  | 0.039164558 | 9.626 | 1 |
| 662 IL7R    | ENST00000303115 | p.S54L   | c.161  | 1.079549729 | 0     | 2 |
| 662 IL7R    | ENST00000303115 | p.Y92C   | c.275  | 0.119977893 | 7.731 | 1 |
| 662 IL7R    | ENST00000303115 | p.K97N   | c.291  | 0.017039183 | 6.875 | 1 |
| 662 IL7R    | ENST00000303115 | p.F99L   | c.297  | 0.180374559 | 3.979 | 1 |
| 663 GCH1    | ENST00000491895 | p.E128D  | c.384  | 0.153079462 | 0     | 1 |
| 663 GCH1    | ENST00000491895 | p.E183Q  | c.547  | 0.015778621 | 6.115 | 1 |
| 663 GCH1    | ENST00000491895 | p.L231M  | c.691  | 0.050295806 | 4.473 | 1 |
| 663 GCH1    | ENST00000491895 | p.R235L  | c.704  | 0.099189066 | 3.417 | 1 |

|              |                 |         |           |             |       |    |
|--------------|-----------------|---------|-----------|-------------|-------|----|
| 664 CYP2E1   | ENST00000252945 | p.V388L | c.1162    | 0.014717805 | 6.221 | 1  |
| 664 CYP2E1   | ENST00000252945 | p.V390A | c.1169    | 0.099181302 | 3.353 | 1  |
| 664 CYP2E1   | ENST00000252945 | p.A89V  | c.266     | 0.111275077 | 0     | 1  |
| 665 ECI1     | ENST00000301729 | p.K63N  | c.189     | 0.048260946 | 4.373 | 1  |
| 665 ECI1     | ENST00000301729 | p.R100C | c.298     | 0.061147408 | 0     | 1  |
| 665 ECI1     | ENST00000301729 | p.G148E | c.443     | 0.012886462 | 6.278 | 1  |
| 666 PTPRD    | ENST00000356435 | p.A545V | c.1634    | 0.211958501 | 2.592 | 1  |
| 666 PTPRD    | ENST00000356435 | p.N546K | c.1638    | 0.324072647 | 1.847 | 1  |
| 666 PTPRD    | ENST00000356435 | p.R588L | c.1763    | 0.443825432 | 0     | 1  |
| 667 PCK1     | ENST00000319441 | p.A281T | c.841     | 0.055100908 | 5.852 | 1  |
| 667 PCK1     | ENST00000319441 | p.A325T | c.973     | 1.017313005 | 0     | 2  |
| 668 RAB25    | ENST00000361084 | p.A88T  | c.262     | 0.138024856 | 0     | 1  |
| 668 RAB25    | ENST00000361084 | p.M121I | c.363     | 0.138024856 | 2.857 | 1  |
| 669 TBC1D22A | ENST00000337137 | p.R437C | c.1309    | 0.131761888 | 0     | 1  |
| 669 TBC1D22A | ENST00000337137 | p.A499V | c.1496    | 0.008528811 | 7.55  | 1  |
| 669 TBC1D22A | ENST00000337137 | p.S221F | c.662_663 | 0.097964794 | 3.39  | 1  |
| 669 TBC1D22A | ENST00000337137 | p.I223M | c.669     | 0.032669147 | 5.212 | 1  |
| 669 TBC1D22A | ENST00000337137 | p.P224S | c.670     | 0.004055232 | 7.946 | 1  |
| 670 HS3ST5   | ENST00000312719 | p.A93T  | c.277     | 0.110358039 | 3.254 | 1  |
| 670 HS3ST5   | ENST00000312719 | p.I96T  | c.287     | 0.094598693 | 5.435 | 1  |
| 670 HS3ST5   | ENST00000312719 | p.E122K | c.364     | 0.03282213  | 5.073 | 1  |
| 670 HS3ST5   | ENST00000312719 | p.E154Q | c.460     | 0.159240908 | 0     | 1  |
| 670 HS3ST5   | ENST00000312719 | p.Y159H | c.475     | 0.070656638 | 9.291 | 1  |
| 671 CRMP1    | ENST00000324989 | p.A485V | c.1454    | 0.021525383 | 6.304 | 1  |
| 671 CRMP1    | ENST00000324989 | p.A485V | c.1454    | 0.062832596 | 4.052 | 1  |
| 671 CRMP1    | ENST00000324989 | p.I598M | c.1794    | 0.072943691 | 0     | 1  |
| 672 HDAC3    | ENST00000305264 | p.N148S | c.443     | 0.077643018 | 3.687 | 1  |
| 672 HDAC3    | ENST00000305264 | p.G176R | c.526     | 0.077643018 | 0     | 1  |
| 673 MGMT     | ENST00000306010 | p.K39R  | c.116     | 0.155149033 | 0     | 1  |
| 673 MGMT     | ENST00000306010 | p.A82V  | c.245     | 0.080384562 | 3.749 | 1  |
| 673 MGMT     | ENST00000306010 | p.P87L  | c.260     | 0.086779633 | 3.63  | 1  |
| 674 DPYS     | ENST00000351513 | p.R118Q | c.353     | 3.014477938 | 0     | 4  |
| 674 DPYS     | ENST00000351513 | p.K153E | c.457     | 0.127792365 | 6.11  | 1  |
| 675 EPHB1    | ENST00000398015 | p.E668A | c.2003    | 0.280130422 | 3.448 | 1  |
| 675 EPHB1    | ENST00000398015 | p.R682L | c.2045    | 0.007387127 | 8.891 | 1  |
| 675 EPHB1    | ENST00000398015 | p.A704T | c.2110    | 0.178912843 | 9     | 1  |
| 675 EPHB1    | ENST00000398015 | p.D762N | c.2284    | 2.097152655 | 0     | 2  |
| 675 EPHB1    | ENST00000398015 | p.D762E | c.2286    | 2.097152655 | 0     | 1  |
| 675 EPHB1    | ENST00000398015 | p.D806N | c.2416    | 0.281503633 | 9.419 | 1  |
| 676 CHEK2    | ENST00000382580 | p.R389C | c.1165    | 4.882928745 | 2.936 | 1  |
| 676 CHEK2    | ENST00000382580 | p.R389G | c.1165    | 4.882928745 | 2.936 | 1  |
| 676 CHEK2    | ENST00000382580 | p.R389H | c.1166    | 4.882928745 | 2.936 | 1  |
| 676 CHEK2    | ENST00000382580 | p.K416E | c.1246    | 20.48681924 | 0     | 21 |
| 676 CHEK2    | ENST00000382580 | p.L434F | c.1302    | 0.154397858 | 8.18  | 1  |
| 676 CHEK2    | ENST00000382580 | p.Y447C | c.1340    | 1.381239623 | 4.315 | 1  |
| 676 CHEK2    | ENST00000382580 | p.I319S | c.956     | 0.881715083 | 4.604 | 1  |
| 677 PLA2G7   | ENST00000274793 | p.S349L | c.1046    | 0.00756733  | 0     | 1  |
| 677 PLA2G7   | ENST00000274793 | p.Q323P | c.968     | 0.00756733  | 7.046 | 1  |
| 678 ANXA6    | ENST00000354546 | p.R11Q  | c.32      | 0.088879838 | 0     | 1  |

|              |                 |         |        |             |       |   |
|--------------|-----------------|---------|--------|-------------|-------|---|
| 678 ANXA6    | ENST00000354546 | p.R281H | c.842  | 0.088879838 | 3.492 | 1 |
| 679 SERPINA5 | ENST00000554866 | p.K350I | c.1049 | 0.177666694 | 0     | 1 |
| 679 SERPINA5 | ENST00000554866 | p.I72M  | c.216  | 0.085010245 | 6.818 | 1 |
| 679 SERPINA5 | ENST00000554866 | p.D186N | c.556  | 0.046836194 | 4.769 | 1 |
| 679 SERPINA5 | ENST00000554866 | p.S311F | c.932  | 0.143457979 | 2.92  | 1 |
| 680 GIPC2    | ENST00000370759 | p.H161D | c.481  | 0.10103052  | 9.197 | 1 |
| 680 GIPC2    | ENST00000370759 | p.R174H | c.521  | 1.020636219 | 0     | 2 |
| 680 GIPC2    | ENST00000370759 | p.P198L | c.593  | 0.167873782 | 5.723 | 1 |
| 681 NEDD8    | ENST00000396828 | p.V23M  | c.67   | 0.183308913 | 8.796 | 1 |
| 681 NEDD8    | ENST00000396828 | p.R25Q  | c.74   | 1.015581438 | 0     | 2 |
| 682 PLA2G7   | ENST00000274793 | p.K386T | c.1157 | 0.013243163 | 9.989 | 1 |
| 682 PLA2G7   | ENST00000274793 | p.Y63N  | c.187  | 0.160308746 | 0     | 1 |
| 682 PLA2G7   | ENST00000274793 | p.P86A  | c.256  | 0.096817737 | 3.661 | 1 |
| 682 PLA2G7   | ENST00000274793 | p.H170R | c.509  | 0.11029163  | 3.639 | 1 |
| 683 FCGR2B   | ENST00000358671 | p.L62F  | c.184  | 1.003754926 | 0     | 1 |
| 683 FCGR2B   | ENST00000358671 | p.L62P  | c.185  | 1.003754926 | 0     | 1 |
| 683 FCGR2B   | ENST00000358671 | p.D107Y | c.319  | 0.007509851 | 8.057 | 1 |
| 684 DARS     | ENST00000264161 | p.M491I | c.1473 | 0.014784579 | 6.781 | 1 |
| 684 DARS     | ENST00000264161 | p.P493S | c.1477 | 0.0213017   | 6.438 | 1 |
| 684 DARS     | ENST00000264161 | p.R494C | c.1480 | 0.093787821 | 3.431 | 1 |
| 684 DARS     | ENST00000264161 | p.P221S | c.661  | 0.113345316 | 0     | 1 |
| 685 HNF1A    | ENST00000541395 | p.M154T | c.461  | 0.017938165 | 5.974 | 1 |
| 685 HNF1A    | ENST00000541395 | p.R159L | c.476  | 0.129567104 | 2.971 | 1 |
| 686 MAPK1    | ENST00000398822 | p.E81K  | c.241  | 0.200157118 | 6.81  | 1 |
| 686 MAPK1    | ENST00000398822 | p.G136E | c.407  | 0.084863716 | 6.479 | 1 |
| 686 MAPK1    | ENST00000398822 | p.D162G | c.485  | 0.140175585 | 9.741 | 1 |
| 686 MAPK1    | ENST00000398822 | p.E322K | c.964  | 5.021291362 | 0     | 6 |
| 687 LCK      | ENST00000333070 | p.P433S | c.1297 | 0.137833645 | 0     | 1 |
| 687 LCK      | ENST00000333070 | p.V479M | c.1435 | 0.137833645 | 2.859 | 1 |
| 688 CD40LG   | ENST00000370629 | p.T135A | c.403  | 0.113125808 | 0     | 1 |
| 688 CD40LG   | ENST00000370629 | p.P244Q | c.731  | 0.113125808 | 3.144 | 1 |
| 689 FOLH1    | ENST00000256999 | p.R730K | c.2189 | 0.044531268 | 6.074 | 1 |
| 689 FOLH1    | ENST00000256999 | p.R281C | c.841  | 2.014843756 | 0     | 2 |
| 689 FOLH1    | ENST00000256999 | p.R281L | c.842  | 2.014843756 | 0     | 1 |
| 691 PIK3CG   | ENST00000496166 | p.S190R | c.570  | 0.021433536 | 9.462 | 1 |
| 691 PIK3CG   | ENST00000496166 | p.R191S | c.571  | 1.100678896 | 0     | 1 |
| 691 PIK3CG   | ENST00000496166 | p.R191H | c.572  | 1.100678896 | 0     | 1 |
| 691 PIK3CG   | ENST00000496166 | p.D192G | c.575  | 0.033961279 | 9.658 | 1 |
| 691 PIK3CG   | ENST00000496166 | p.A197V | c.590  | 0.230921179 | 6.433 | 1 |
| 691 PIK3CG   | ENST00000496166 | p.D316H | c.946  | 0.346840107 | 3.532 | 1 |
| 692 RBBP7    | ENST00000380084 | p.V341L | c.1021 | 0.016401823 | 6.93  | 1 |
| 692 RBBP7    | ENST00000380084 | p.E357K | c.1069 | 1.035724135 | 5.936 | 2 |
| 692 RBBP7    | ENST00000380084 | p.S358Y | c.1073 | 0.175634946 | 3.71  | 1 |
| 692 RBBP7    | ENST00000380084 | p.H359Y | c.1075 | 0.319494995 | 3.175 | 1 |
| 692 RBBP7    | ENST00000380084 | p.R384H | c.1151 | 0.196002664 | 6.84  | 1 |
| 692 RBBP7    | ENST00000380084 | p.N386H | c.1156 | 1.272037778 | 0     | 1 |
| 692 RBBP7    | ENST00000380084 | p.N386T | c.1157 | 1.272037778 | 0     | 1 |
| 692 RBBP7    | ENST00000380084 | p.H413L | c.1238 | 0.171005195 | 4.824 | 1 |
| 693 BCHE     | ENST00000264381 | p.F446L | c.1338 | 0.051904377 | 4.268 | 1 |

|             |                 |          |        |             |       |   |
|-------------|-----------------|----------|--------|-------------|-------|---|
| 693 BCHE    | ENST00000264381 | p.R452Q  | c.1355 | 0.013744517 | 6.185 | 1 |
| 693 BCHE    | ENST00000264381 | p.K527R  | c.1580 | 0.065648893 | 0     | 1 |
| 694 MTOR    | ENST00000361445 | p.I1973F | c.5917 | 1.19445244  | 9.173 | 2 |
| 694 MTOR    | ENST00000361445 | p.Y1974C | c.5921 | 0.102465026 | 7.87  | 1 |
| 694 MTOR    | ENST00000361445 | p.T1977K | c.5930 | 1.23756125  | 0     | 1 |
| 694 MTOR    | ENST00000361445 | p.T1977R | c.5930 | 1.23756125  | 0     | 1 |
| 694 MTOR    | ENST00000361445 | p.V2006I | c.6016 | 1.18869246  | 5.197 | 1 |
| 694 MTOR    | ENST00000361445 | p.V2006L | c.6016 | 1.18869246  | 5.197 | 1 |
| 694 MTOR    | ENST00000361445 | p.S2013G | c.6037 | 0.437907708 | 2.79  | 1 |
| 694 MTOR    | ENST00000361445 | p.L2230V | c.6688 | 0.20136454  | 5.025 | 1 |
| 695 PIWIL1  | ENST00000245255 | p.G373V  | c.1118 | 0.274142897 | 1.867 | 1 |
| 695 PIWIL1  | ENST00000245255 | p.R397H  | c.1190 | 0.274142897 | 0     | 1 |
| 696 SOS1    | ENST00000426016 | p.E433K  | c.1297 | 0.020655668 | 5.773 | 1 |
| 696 SOS1    | ENST00000426016 | p.C441Y  | c.1322 | 0.14152912  | 2.949 | 1 |
| 696 SOS1    | ENST00000426016 | p.M446L  | c.1336 | 0.010640292 | 6.73  | 1 |
| 696 SOS1    | ENST00000426016 | p.L463I  | c.1387 | 0.009536539 | 9.837 | 1 |
| 696 SOS1    | ENST00000426016 | p.L467V  | c.1399 | 0.15829907  | 0     | 1 |
| 697 CXCR1   | ENST00000295683 | p.P180A  | c.538  | 1.030018589 | 0     | 1 |
| 697 CXCR1   | ENST00000295683 | p.P180S  | c.538  | 1.030018589 | 0     | 1 |
| 697 CXCR1   | ENST00000295683 | p.R280C  | c.838  | 0.060037179 | 5.058 | 1 |
| 698 CBL     | ENST00000264033 | p.C384W  | c.1152 | 0.019357011 | 5.691 | 1 |
| 698 CBL     | ENST00000264033 | p.F418L  | c.1252 | 0.019357011 | 0     | 1 |
| 699 KIF2C   | ENST00000372224 | p.Y405C  | c.1214 | 0.061853541 | 4.015 | 1 |
| 699 KIF2C   | ENST00000372224 | p.S470F  | c.1409 | 0.061853541 | 0     | 1 |
| 700 PACSIN1 | ENST00000538621 | p.M224I  | c.672  | 0.011274543 | 0     | 1 |
| 700 PACSIN1 | ENST00000538621 | p.R288C  | c.862  | 0.005291894 | 7.562 | 1 |
| 700 PACSIN1 | ENST00000538621 | p.M295I  | c.885  | 0.005982648 | 7.385 | 1 |
| 701 RANBP2  | ENST00000283195 | p.E2030K | c.6088 | 0.048150948 | 0     | 1 |
| 701 RANBP2  | ENST00000283195 | p.L2063F | c.6187 | 0.024484287 | 5.352 | 1 |
| 701 RANBP2  | ENST00000283195 | p.E2066K | c.6196 | 0.023666661 | 5.401 | 1 |
| 702 SPHK1   | ENST00000323374 | p.M431I  | c.1293 | 0.088265461 | 0     | 1 |
| 702 SPHK1   | ENST00000323374 | p.T243A  | c.727  | 0.077481731 | 3.69  | 1 |
| 702 SPHK1   | ENST00000323374 | p.A256T  | c.766  | 0.010783729 | 6.535 | 1 |
| 703 PTPRM   | ENST00000400060 | p.E1031Q | c.3091 | 0.006924857 | 7.174 | 1 |
| 703 PTPRM   | ENST00000400060 | p.I1032L | c.3094 | 0.017668158 | 5.923 | 1 |
| 703 PTPRM   | ENST00000400060 | p.D1035G | c.3104 | 0.073179537 | 3.796 | 1 |
| 703 PTPRM   | ENST00000400060 | p.E1057Q | c.3169 | 0.095399433 | 0     | 1 |
| 704 MAOA    | ENST00000338702 | p.G103E  | c.308  | 0.06882135  | 3.861 | 1 |
| 704 MAOA    | ENST00000338702 | p.D328Y  | c.982  | 0.06882135  | 0     | 1 |
| 705 CA12    | ENST00000178638 | p.P57S   | c.169  | 0.034114487 | 7.197 | 1 |
| 705 CA12    | ENST00000178638 | p.S164L  | c.491  | 0.1045308   | 3.258 | 1 |
| 705 CA12    | ENST00000178638 | p.P232T  | c.694  | 0.111346134 | 0     | 1 |
| 706 FSCN1   | ENST00000382361 | p.R344H  | c.1031 | 1.008460743 | 0     | 2 |
| 706 FSCN1   | ENST00000382361 | p.E374D  | c.1122 | 0.036006145 | 6.885 | 1 |
| 707 NT5E    | ENST00000257770 | p.Q351E  | c.1051 | 0.129947429 | 2.944 | 1 |
| 707 NT5E    | ENST00000257770 | p.Y281H  | c.841  | 0.129947429 | 0     | 1 |
| 708 CLEC5A  | ENST00000546910 | p.E76K   | c.226  | 1.019922276 | 6.914 | 2 |
| 708 CLEC5A  | ENST00000546910 | p.F77L   | c.231  | 0.006810611 | 8.198 | 1 |
| 708 CLEC5A  | ENST00000546910 | p.F83I   | c.247  | 0.129126048 | 3.993 | 1 |

|             |                 |         |           |             |       |   |
|-------------|-----------------|---------|-----------|-------------|-------|---|
| 708 CLECSA  | ENST00000546910 | p.L118F | c.352     | 1.086376079 | 0     | 1 |
| 708 CLECSA  | ENST00000546910 | p.L118V | c.352     | 1.086376079 | 0     | 1 |
| 708 CLECSA  | ENST00000546910 | p.T167A | c.499     | 0.01935603  | 8.125 | 1 |
| 709 BBOX1   | ENST00000525090 | p.F176V | c.526     | 1.009545259 | 0     | 2 |
| 709 BBOX1   | ENST00000525090 | p.D204N | c.610     | 0.019090517 | 6.711 | 1 |
| 710 PANK3   | ENST00000239231 | p.R49W  | c.145     | 0.014013877 | 6.157 | 1 |
| 710 PANK3   | ENST00000239231 | p.R78Q  | c.233     | 0.005652089 | 7.467 | 1 |
| 710 PANK3   | ENST00000239231 | p.P12L  | c.35_34   | 0.019665967 | 0     | 1 |
| 711 CSNK1E  | ENST00000400206 | p.R98H  | c.293     | 1.04584641  | 0     | 2 |
| 711 CSNK1E  | ENST00000400206 | p.R178H | c.533     | 0.083388948 | 4.584 | 1 |
| 711 CSNK1E  | ENST00000400206 | p.M204Q | c.611_610 | 0.008303872 | 7.912 | 1 |
| 712 PFKFB1  | ENST00000375006 | p.E386D | c.1158    | 0.156743347 | 2.709 | 1 |
| 712 PFKFB1  | ENST00000375006 | p.F404S | c.1211    | 0.032341956 | 5.328 | 1 |
| 712 PFKFB1  | ENST00000375006 | p.R252H | c.755     | 0.177831008 | 0     | 1 |
| 713 CTNNA1  | ENST00000302763 | p.K409N | c.1227    | 0.004906806 | 7.671 | 1 |
| 713 CTNNA1  | ENST00000302763 | p.A473T | c.1417    | 0.023513944 | 0     | 1 |
| 713 CTNNA1  | ENST00000302763 | p.A236T | c.706     | 0.018607138 | 5.748 | 1 |
| 714 NR1I3   | ENST00000367979 | p.F129S | c.386     | 0.1468048   | 4.164 | 1 |
| 714 NR1I3   | ENST00000367979 | p.F167L | c.501     | 0.026042395 | 9.764 | 1 |
| 714 NR1I3   | ENST00000367979 | p.G220R | c.658     | 1.056934306 | 0     | 1 |
| 714 NR1I3   | ENST00000367979 | p.G220W | c.658     | 1.056934306 | 0     | 1 |
| 715 BCHE    | ENST00000264381 | p.L138W | c.413     | 0.164367845 | 2.605 | 1 |
| 715 BCHE    | ENST00000264381 | p.V169A | c.506     | 0.164367845 | 0     | 1 |
| 716 LIFR    | ENST00000263409 | p.S368N | c.1103    | 0.007817917 | 6.999 | 1 |
| 716 LIFR    | ENST00000263409 | p.S419L | c.1256    | 0.007817917 | 0     | 1 |
| 717 KCNIP1  | ENST00000434108 | p.D72N  | c.214     | 0.014189819 | 6.139 | 1 |
| 717 KCNIP1  | ENST00000434108 | p.F120V | c.358     | 0.014189819 | 0     | 1 |
| 718 POT1    | ENST00000357628 | p.S178L | c.533     | 0.031185085 | 0     | 1 |
| 718 POT1    | ENST00000357628 | p.D224H | c.670     | 0.031185085 | 5.003 | 1 |
| 719 PVRL4   | ENST00000368012 | p.S170C | c.509     | 0.081920934 | 0     | 1 |
| 719 PVRL4   | ENST00000368012 | p.S206L | c.617     | 0.081228116 | 3.644 | 1 |
| 719 PVRL4   | ENST00000368012 | p.T222I | c.665     | 0.07492687  | 9.018 | 1 |
| 721 IDE     | ENST00000265986 | p.K119N | c.357     | 0.059954007 | 5.06  | 1 |
| 721 IDE     | ENST00000265986 | p.K273Q | c.817     | 1.029977004 | 0     | 2 |
| 722 PRKCCQ  | ENST00000263125 | p.E161K | c.481     | 0.215237297 | 2.216 | 1 |
| 722 PRKCCQ  | ENST00000263125 | p.R191Q | c.572     | 0.215237297 | 0     | 1 |
| 723 TIAM1   | ENST00000286827 | p.A439T | c.1315    | 1.011630041 | 0     | 2 |
| 723 TIAM1   | ENST00000286827 | p.F515L | c.1545    | 0.039753109 | 6.426 | 1 |
| 724 CARM1   | ENST00000327064 | p.S461F | c.1382    | 0.162042794 | 2.659 | 1 |
| 724 CARM1   | ENST00000327064 | p.S463F | c.1388    | 0.027167873 | 5.414 | 1 |
| 724 CARM1   | ENST00000327064 | p.S317F | c.950     | 0.181783643 | 0     | 1 |
| 725 USP4    | ENST00000265560 | p.S394Y | c.1181    | 0.11474292  | 0     | 1 |
| 725 USP4    | ENST00000265560 | p.S315C | c.944     | 0.045673372 | 4.553 | 1 |
| 725 USP4    | ENST00000265560 | p.A316T | c.946     | 0.075216129 | 3.793 | 1 |
| 727 HSD11B1 | ENST00000367027 | p.G58R  | c.172     | 1.185672987 | 0     | 1 |
| 727 HSD11B1 | ENST00000367027 | p.G58E  | c.173     | 1.185672987 | 0     | 1 |
| 727 HSD11B1 | ENST00000367027 | p.T92P  | c.274     | 0.205821895 | 3.342 | 1 |
| 727 HSD11B1 | ENST00000367027 | p.L109F | c.325     | 0.065601672 | 6.519 | 1 |
| 727 HSD11B1 | ENST00000367027 | p.H232Y | c.694     | 0.159811134 | 3.715 | 1 |

|              |                 |                    |           |             |       |   |
|--------------|-----------------|--------------------|-----------|-------------|-------|---|
| 728 SUPV3L1  | ENST00000359655 | p.N363S            | c.1088    | 1.012464769 | 0     | 2 |
| 728 SUPV3L1  | ENST00000359655 | p.R388Q            | c.1163    | 0.024929539 | 6.326 | 1 |
| 729 ASMT     | ENST00000381241 | p.G337R            | c.1009    | 0.086269835 | 0     | 1 |
| 729 ASMT     | ENST00000381241 | p.W285C            | c.855     | 0.086269835 | 3.535 | 1 |
| 731 CAT      | ENST00000241052 | p.D335N            | c.1003    | 0.019885428 | 6.746 | 1 |
| 731 CAT      | ENST00000241052 | p.R363C            | c.1087    | 1.151455828 | 0     | 1 |
| 731 CAT      | ENST00000241052 | p.R363H            | c.1088    | 1.151455828 | 0     | 1 |
| 731 CAT      | ENST00000241052 | p.N369S            | c.1106    | 0.030461454 | 9.973 | 1 |
| 731 CAT      | ENST00000241052 | p.E67V             | c.200_201 | 0.277527403 | 2.895 | 1 |
| 731 CAT      | ENST00000241052 | p.R72T             | c.215     | 0.156249514 | 7.22  | 1 |
| 732 PTRN2    | ENST00000404321 | p.A780V            | c.2339    | 0.027091799 | 6.206 | 1 |
| 732 PTRN2    | ENST00000404321 | p.E1002K           | c.3004    | 1.013545899 | 0     | 2 |
| 733 OPN1LW   | ENST00000369951 | p.E41K             | c.121     | 0.027546255 | 0     | 1 |
| 733 OPN1LW   | ENST00000369951 | p.F119L            | c.357     | 0.027546255 | 5.182 | 1 |
| 734 SUPV3L1  | ENST00000359655 | p.V289G            | c.866     | 0.023765293 | 0     | 1 |
| 734 SUPV3L1  | ENST00000359655 | p.L319V            | c.955     | 0.023765293 | 5.395 | 1 |
| 735 TGFBI    | ENST00000442011 | p.T504N            | c.1511    | 0.31105199  | 1.778 | 1 |
| 735 TGFBI    | ENST00000442011 | p.G535E            | c.1604    | 0.086218735 | 3.905 | 1 |
| 735 TGFBI    | ENST00000442011 | p.T621P            | c.1861    | 0.35834143  | 0     | 1 |
| 736 RNASEL   | ENST00000444138 | p.R400H            | c.1199    | 0.015248299 | 7.136 | 1 |
| 736 RNASEL   | ENST00000444138 | p.R403L            | c.1208    | 0.116207922 | 3.124 | 1 |
| 736 RNASEL   | ENST00000444138 | p.D485Y            | c.1453    | 0.041379943 | 6.254 | 1 |
| 736 RNASEL   | ENST00000444138 | p.S507N            | c.1520    | 0.134917291 | 0     | 1 |
| 737 FANCL    | ENST00000402135 | p.T372I            | c.1115    | 0.006857983 | 7.188 | 1 |
| 737 FANCL    | ENST00000402135 | p.M310V            | c.928     | 0.006857983 | 0     | 1 |
| 738 MASP1    | ENST00000296280 | p.H64Y             | c.190     | 0.032617601 | 0     | 1 |
| 738 MASP1    | ENST00000296280 | p.A133V            | c.398     | 0.032285152 | 5.407 | 1 |
| 738 MASP1    | ENST00000296280 | p.H134L            | c.401     | 0.009049163 | 6.788 | 1 |
| 739 SERPINA7 | ENST00000327674 | p.F51L             | c.153     | 0.076415017 | 3.71  | 1 |
| 739 SERPINA7 | ENST00000327674 | p.L289Q            | c.866     | 0.076415017 | 0     | 1 |
| 740 RNMT     | ENST00000592764 | p.K194N            | c.582     | 0.002781348 | 0     | 1 |
| 740 RNMT     | ENST00000592764 | p.S232F            | c.695     | 0.002781348 | 8.49  | 1 |
| 741 C8A      | ENST00000361249 | p.D139N            | c.415     | 0.037173031 | 6.408 | 1 |
| 741 C8A      | ENST00000361249 | p.E144K            | c.430     | 0.412892274 | 2.515 | 1 |
| 741 C8A      | ENST00000361249 | p.E203D            | c.609     | 0.125986473 | 9.059 | 1 |
| 741 C8A      | ENST00000361249 | p.Y205H            | c.613     | 0.179048741 | 6.964 | 1 |
| 741 C8A      | ENST00000361249 | p.R207W            | c.619     | 1.196609049 | 0     | 1 |
| 741 C8A      | ENST00000361249 | p.R207Q            | c.620_621 | 1.196609049 | 0     | 1 |
| 742 HSD17B4  | ENST00000504811 | p.E103in_frame_del | c.304_306 | 0.007365504 | 0     | 1 |
| 742 HSD17B4  | ENST00000504811 | p.R146I            | c.437     | 0.007365504 | 7.085 | 1 |
| 743 SIRT3    | ENST00000382743 | p.F192L            | c.574     | 0.071497925 | 0     | 1 |
| 743 SIRT3    | ENST00000382743 | p.V286I            | c.856     | 0.010791207 | 6.534 | 1 |
| 743 SIRT3    | ENST00000382743 | p.K288E            | c.862     | 0.060706718 | 4.042 | 1 |
| 744 PARP3    | ENST00000398755 | p.L453M            | c.1357    | 0.082260665 | 3.768 | 1 |
| 744 PARP3    | ENST00000398755 | p.E456V            | c.1367    | 0.12951517  | 3.051 | 1 |
| 744 PARP3    | ENST00000398755 | p.I477V            | c.1429    | 0.194062251 | 0     | 1 |
| 745 CD46     | ENST00000322875 | p.C35G             | c.103     | 0.038809268 | 0     | 1 |
| 745 CD46     | ENST00000322875 | p.R82Q             | c.245     | 0.021448194 | 5.543 | 1 |
| 745 CD46     | ENST00000322875 | p.P12S             | c.34      | 0.017361074 | 5.848 | 1 |

|             |                 |         |           |             |       |   |
|-------------|-----------------|---------|-----------|-------------|-------|---|
| 746 SAMHD1  | ENST00000262878 | p.P121S | c.361     | 0.074325445 | 3.75  | 1 |
| 746 SAMHD1  | ENST00000262878 | p.G324E | c.971     | 0.074325445 | 0     | 1 |
| 747 PLG     | ENST00000308192 | p.V581A | c.1742    | 0.231328469 | 0     | 1 |
| 747 PLG     | ENST00000308192 | p.G705R | c.2113    | 0.126182674 | 3.148 | 1 |
| 747 PLG     | ENST00000308192 | p.T710N | c.2129    | 0.074992637 | 3.96  | 1 |
| 747 PLG     | ENST00000308192 | p.A719V | c.2156    | 0.063866348 | 4.204 | 1 |
| 748 CASK    | ENST00000318588 | p.R61P  | c.182     | 0.152724138 | 0     | 1 |
| 748 CASK    | ENST00000318588 | p.A166P | c.496     | 0.152724138 | 2.711 | 1 |
| 749 CDK8    | ENST00000381527 | p.S60P  | c.178     | 0.030374406 | 6.041 | 1 |
| 749 CDK8    | ENST00000381527 | p.A63T  | c.187     | 0.075729541 | 4.723 | 1 |
| 749 CDK8    | ENST00000381527 | p.V93M  | c.276_277 | 1.053051974 | 0     | 1 |
| 749 CDK8    | ENST00000381527 | p.V93L  | c.277     | 1.053051974 | 0     | 1 |
| 750 GPX5    | ENST00000412168 | p.H158N | c.472     | 0.092638254 | 7.636 | 1 |
| 750 GPX5    | ENST00000412168 | p.P159S | c.475     | 1.065902569 | 0     | 1 |
| 750 GPX5    | ENST00000412168 | p.P159L | c.476_477 | 1.065902569 | 0     | 1 |
| 750 GPX5    | ENST00000412168 | p.R197C | c.589     | 0.204334184 | 4.038 | 1 |
| 751 C5      | ENST00000223642 | p.R539Q | c.1616    | 0.051724801 | 4.273 | 1 |
| 751 C5      | ENST00000223642 | p.L673I | c.2017    | 0.051724801 | 0     | 1 |
| 752 ROBO1   | ENST00000464233 | p.V810G | c.2429    | 0.053958722 | 4.212 | 1 |
| 752 ROBO1   | ENST00000464233 | p.A854S | c.2560    | 0.053958722 | 0     | 1 |
| 753 ITGAM   | ENST00000544665 | p.S158Y | c.473     | 0.518286868 | 2.943 | 1 |
| 753 ITGAM   | ENST00000544665 | p.G223W | c.667     | 0.196708874 | 5.743 | 1 |
| 753 ITGAM   | ENST00000544665 | p.R224L | c.671     | 1.180156158 | 0     | 1 |
| 753 ITGAM   | ENST00000544665 | p.R224Q | c.671     | 1.180156158 | 0     | 1 |
| 753 ITGAM   | ENST00000544665 | p.G244R | c.730     | 0.012808061 | 9.719 | 1 |
| 753 ITGAM   | ENST00000544665 | p.D258N | c.772     | 0.166326869 | 6.254 | 1 |
| 753 ITGAM   | ENST00000544665 | p.D264N | c.790     | 0.056894475 | 5.865 | 1 |
| 754 HMGCS2  | ENST00000369406 | p.R424L | c.1271    | 0.02110488  | 0     | 1 |
| 754 HMGCS2  | ENST00000369406 | p.V54M  | c.160     | 0.005970221 | 7.388 | 1 |
| 754 HMGCS2  | ENST00000369406 | p.D294N | c.880     | 0.015134659 | 6.046 | 1 |
| 755 ANTXR2  | ENST00000307333 | p.F65L  | c.195     | 0.007264101 | 7.105 | 1 |
| 755 ANTXR2  | ENST00000307333 | p.E71G  | c.212     | 0.036701937 | 4.768 | 1 |
| 755 ANTXR2  | ENST00000307333 | p.L106F | c.318     | 0.043966038 | 0     | 1 |
| 756 CAPN9   | ENST00000271971 | p.Q91R  | c.272     | 0.022143084 | 5.497 | 1 |
| 756 CAPN9   | ENST00000271971 | p.V158I | c.472     | 0.022143084 | 0     | 1 |
| 757 LRP6    | ENST00000261349 | p.D368N | c.1102    | 0.00709491  | 0     | 1 |
| 757 LRP6    | ENST00000261349 | p.N416S | c.1247    | 0.00709491  | 7.139 | 1 |
| 759 PITRM1  | ENST00000380989 | p.L352F | c.1054    | 0.011882647 | 0     | 1 |
| 759 PITRM1  | ENST00000380989 | p.E426K | c.1276    | 0.011882647 | 6.395 | 1 |
| 760 CYP2C9  | ENST00000260682 | p.R357T | c.1070    | 0.191236203 | 6.668 | 1 |
| 760 CYP2C9  | ENST00000260682 | p.P402S | c.1204    | 1.011201771 | 0     | 2 |
| 760 CYP2C9  | ENST00000260682 | p.P404T | c.1210    | 0.14633504  | 9.514 | 1 |
| 761 ALDH3A1 | ENST00000444455 | p.E420K | c.1258    | 0.0312813   | 6.205 | 1 |
| 761 ALDH3A1 | ENST00000444455 | p.M74I  | c.222     | 0.148124369 | 0     | 1 |
| 761 ALDH3A1 | ENST00000444455 | p.A130V | c.389     | 0.117446954 | 3.139 | 1 |
| 761 ALDH3A1 | ENST00000444455 | p.A131V | c.392     | 0.03962738  | 5.57  | 1 |
| 762 FAP     | ENST00000188790 | p.D457N | c.1369    | 0.004250947 | 7.878 | 1 |
| 762 FAP     | ENST00000188790 | p.R109W | c.325     | 0.004250947 | 0     | 1 |
| 763 ADRBK1  | ENST00000308595 | p.R199C | c.595     | 0.009732324 | 6.683 | 1 |

|              |                 |          |             |             |       |    |
|--------------|-----------------|----------|-------------|-------------|-------|----|
| 763 ADRBK1   | ENST00000308595 | p.G200W  | c.598       | 0.056367211 | 4.149 | 1  |
| 763 ADRBK1   | ENST00000308595 | p.R226C  | c.676       | 0.066099535 | 0     | 1  |
| 764 PTPN13   | ENST00000436978 | p.G2199S | c.6595      | 0.135465746 | 0     | 1  |
| 764 PTPN13   | ENST00000436978 | p.E2480Q | c.7438      | 0.135465746 | 2.884 | 1  |
| 765 EML1     | ENST00000334192 | p.V764I  | c.2290      | 0.014384122 | 0     | 1  |
| 765 EML1     | ENST00000334192 | p.F785L  | c.2355      | 0.009335869 | 6.743 | 1  |
| 765 EML1     | ENST00000334192 | p.C789S  | c.2365      | 0.005048253 | 7.63  | 1  |
| 766 MMP9     | ENST00000372330 | p.G404C  | c.1209_1210 | 1.057764096 | 0     | 1  |
| 766 MMP9     | ENST00000372330 | p.G404S  | c.1210      | 1.057764096 | 0     | 1  |
| 766 MMP9     | ENST00000372330 | p.A406T  | c.1216      | 0.371693532 | 7.299 | 1  |
| 766 MMP9     | ENST00000372330 | p.A144S  | c.430       | 1.050638786 | 6.158 | 1  |
| 766 MMP9     | ENST00000372330 | p.A144T  | c.430       | 1.050638786 | 6.158 | 1  |
| 766 MMP9     | ENST00000372330 | p.P194T  | c.580       | 0.341588099 | 5.417 | 1  |
| 767 A2M      | ENST00000318602 | p.S923L  | c.2768      | 0.015382249 | 6.159 | 1  |
| 767 A2M      | ENST00000318602 | p.G952E  | c.2855      | 0.11584586  | 3.334 | 1  |
| 767 A2M      | ENST00000318602 | p.D953G  | c.2858      | 0.026358466 | 5.382 | 1  |
| 767 A2M      | ENST00000318602 | p.C1321Y | c.3962      | 0.13842217  | 0     | 1  |
| 767 A2M      | ENST00000318602 | p.L1324I | c.3970      | 0.014193855 | 9.609 | 1  |
| 768 EGFR     | ENST00000275493 | p.L62R   | c.185       | 3.315453444 | 4.396 | 3  |
| 768 EGFR     | ENST00000275493 | p.G63R   | c.187       | 1.337871862 | 8.752 | 1  |
| 768 EGFR     | ENST00000275493 | p.G63K   | c.187_188   | 1.337871862 | 8.752 | 1  |
| 768 EGFR     | ENST00000275493 | p.E84V   | c.251       | 1.983348841 | 4.67  | 1  |
| 768 EGFR     | ENST00000275493 | p.V85M   | c.253       | 2.319236077 | 5.533 | 1  |
| 768 EGFR     | ENST00000275493 | p.R108G  | c.322       | 7.383260425 | 3.531 | 1  |
| 768 EGFR     | ENST00000275493 | p.R108K  | c.323       | 7.383260425 | 3.531 | 4  |
| 768 EGFR     | ENST00000275493 | p.R222C  | c.664       | 4.707773717 | 8.599 | 5  |
| 768 EGFR     | ENST00000275493 | p.R252C  | c.754       | 6.777874813 | 5.204 | 3  |
| 768 EGFR     | ENST00000275493 | p.R252P  | c.755       | 6.777874813 | 5.204 | 3  |
| 768 EGFR     | ENST00000275493 | p.F254I  | c.760       | 4.630001099 | 2.504 | 1  |
| 768 EGFR     | ENST00000275493 | p.D256Y  | c.766       | 0.73400312  | 5.182 | 1  |
| 768 EGFR     | ENST00000275493 | p.C264Y  | c.791       | 0.498008522 | 5.848 | 1  |
| 768 EGFR     | ENST00000275493 | p.A289T  | c.865       | 25.04363397 | 0     | 6  |
| 768 EGFR     | ENST00000275493 | p.A289I  | c.865_866   | 25.04363397 | 0     | 1  |
| 768 EGFR     | ENST00000275493 | p.A289N  | c.865_866   | 25.04363397 | 0     | 1  |
| 768 EGFR     | ENST00000275493 | p.A289D  | c.866       | 25.04363397 | 0     | 3  |
| 768 EGFR     | ENST00000275493 | p.A289V  | c.866       | 25.04363397 | 0     | 14 |
| 768 EGFR     | ENST00000275493 | p.H304Y  | c.910       | 2.172632678 | 8.916 | 3  |
| 769 SERPINA6 | ENST00000341584 | p.L156F  | c.468       | 0.008408126 | 6.894 | 1  |
| 769 SERPINA6 | ENST00000341584 | p.W163R  | c.487       | 0.051688961 | 4.274 | 1  |
| 769 SERPINA6 | ENST00000341584 | p.V196I  | c.586       | 0.060097087 | 0     | 1  |
| 770 F11      | ENST00000403665 | p.S503C  | c.1508      | 0.031805025 | 5.059 | 1  |
| 770 F11      | ENST00000403665 | p.S192F  | c.575       | 0.062052848 | 4.053 | 1  |
| 770 F11      | ENST00000403665 | p.R284K  | c.851       | 0.090243402 | 0     | 1  |
| 771 FASN     | ENST00000306749 | p.E2362K | c.7084      | 0.009400805 | 6.733 | 1  |
| 771 FASN     | ENST00000306749 | p.A2363V | c.7088      | 0.100481374 | 3.315 | 1  |
| 771 FASN     | ENST00000306749 | p.R2428H | c.7283      | 0.109882179 | 0     | 1  |
| 773 NEU2     | ENST00000233840 | p.A38T   | c.112       | 0.071957754 | 4.215 | 1  |
| 773 NEU2     | ENST00000233840 | p.P87L   | c.260       | 0.169670143 | 0     | 1  |
| 773 NEU2     | ENST00000233840 | p.G162E  | c.485       | 0.122060214 | 3.11  | 1  |



|     |         |                 |          |           |             |       |   |
|-----|---------|-----------------|----------|-----------|-------------|-------|---|
| 774 | NEO1    | ENST00000339362 | p.I455M  | c.1365    | 0.033936933 | 0     | 1 |
| 774 | NEO1    | ENST00000339362 | p.T507I  | c.1520    | 0.033936933 | 4.881 | 1 |
| 775 | PPP2R2A | ENST00000315985 | p.V367D  | c.1100    | 0.009739368 | 7.898 | 1 |
| 775 | PPP2R2A | ENST00000315985 | p.R262W  | c.784     | 1.031511014 | 5.988 | 1 |
| 775 | PPP2R2A | ENST00000315985 | p.R262Q  | c.785     | 1.031511014 | 5.988 | 1 |
| 775 | PPP2R2A | ENST00000315985 | p.M310T  | c.929     | 1.035703437 | 0     | 1 |
| 775 | PPP2R2A | ENST00000315985 | p.M310I  | c.930     | 1.035703437 | 0     | 1 |
| 776 | RBP5    | ENST00000266560 | p.T51A   | c.151     | 0.004422261 | 7.821 | 1 |
| 776 | RBP5    | ENST00000266560 | p.E72G   | c.215     | 0.004422261 | 0     | 1 |
| 777 | MLH1    | ENST00000231790 | p.L588R  | c.1763    | 0.008906041 | 6.811 | 1 |
| 777 | MLH1    | ENST00000231790 | p.L590I  | c.1768    | 0.078237279 | 3.676 | 1 |
| 777 | MLH1    | ENST00000231790 | p.L658I  | c.1972    | 0.08714332  | 0     | 1 |
| 778 | C5      | ENST00000223642 | p.P60A   | c.178     | 0.109207819 | 0     | 1 |
| 778 | C5      | ENST00000223642 | p.R1308C | c.3922    | 0.08948861  | 3.513 | 1 |
| 778 | C5      | ENST00000223642 | p.L1309F | c.3927    | 0.023505498 | 5.532 | 1 |
| 779 | ADSL    | ENST00000454266 | p.R473T  | c.1418    | 0.033990364 | 9.297 | 1 |
| 779 | ADSL    | ENST00000454266 | p.S112Y  | c.335     | 0.01539177  | 6.182 | 1 |
| 779 | ADSL    | ENST00000454266 | p.N118D  | c.352     | 0.133289941 | 3.089 | 1 |
| 779 | ADSL    | ENST00000454266 | p.R210W  | c.628     | 0.253425658 | 0     | 1 |
| 779 | ADSL    | ENST00000454266 | p.G217C  | c.649     | 0.145831673 | 7.734 | 1 |
| 779 | ADSL    | ENST00000454266 | p.D237E  | c.711     | 0.109223314 | 4.022 | 1 |
| 779 | ADSL    | ENST00000454266 | p.R248K  | c.743     | 0.027100916 | 5.844 | 1 |
| 779 | ADSL    | ENST00000454266 | p.G254R  | c.760     | 0.172600413 | 4.761 | 1 |
| 780 | NCAM2   | ENST00000400546 | p.R77G   | c.229     | 0.011048543 | 0     | 1 |
| 780 | NCAM2   | ENST00000400546 | p.S26L   | c.77      | 0.011048543 | 6.5   | 1 |
| 781 | ACO1    | ENST00000379923 | p.R802H  | c.2405    | 0.077636168 | 6.725 | 1 |
| 781 | ACO1    | ENST00000379923 | p.R82C   | c.244     | 0.205741621 | 3.295 | 1 |
| 781 | ACO1    | ENST00000379923 | p.V202M  | c.604     | 1.130707553 | 0     | 2 |
| 781 | ACO1    | ENST00000379923 | p.E225K  | c.673     | 0.112360526 | 5.69  | 1 |
| 782 | MMP8    | ENST00000236826 | p.W140C  | c.420     | 0.104191636 | 0     | 1 |
| 782 | MMP8    | ENST00000236826 | p.H221N  | c.661     | 0.026310795 | 5.359 | 1 |
| 782 | MMP8    | ENST00000236826 | p.D253N  | c.757     | 0.081770879 | 3.647 | 1 |
| 783 | CSF3R   | ENST00000440588 | p.Q168H  | c.504     | 0.044409126 | 4.493 | 1 |
| 783 | CSF3R   | ENST00000440588 | p.W202S  | c.605     | 0.044409126 | 0     | 1 |
| 784 | BLMH    | ENST00000261714 | p.E400K  | c.1198    | 0.026168953 | 5.256 | 1 |
| 784 | BLMH    | ENST00000261714 | p.H402P  | c.1205    | 0.019437687 | 6.684 | 1 |
| 784 | BLMH    | ENST00000261714 | p.N66D   | c.196     | 0.035894533 | 0     | 1 |
| 785 | DCTD    | ENST00000357067 | p.F119V  | c.355     | 0.005362049 | 7.543 | 1 |
| 785 | DCTD    | ENST00000357067 | p.S146C  | c.436     | 0.005362049 | 0     | 1 |
| 786 | ALDH4A1 | ENST00000290597 | p.I121T  | c.362     | 0.009252122 | 0     | 1 |
| 786 | ALDH4A1 | ENST00000290597 | p.L180V  | c.538     | 0.009252122 | 6.756 | 1 |
| 787 | UPF2    | ENST00000357604 | p.H191N  | c.571_570 | 1.005295564 | 0     | 2 |
| 787 | UPF2    | ENST00000357604 | p.R232C  | c.694     | 0.010591128 | 7.561 | 1 |
| 788 | PIK3CA  | ENST00000263967 | p.T342S  | c.1024    | 1.450583481 | 5.919 | 1 |
| 788 | PIK3CA  | ENST00000263967 | p.V344M  | c.1030    | 9.287951282 | 5.881 | 4 |
| 788 | PIK3CA  | ENST00000263967 | p.V344A  | c.1031    | 9.287951282 | 5.881 | 2 |
| 788 | PIK3CA  | ENST00000263967 | p.V344G  | c.1031    | 9.287951282 | 5.881 | 3 |
| 788 | PIK3CA  | ENST00000263967 | p.N345I  | c.1034    | 23.55777267 | 0     | 1 |
| 788 | PIK3CA  | ENST00000263967 | p.N345T  | c.1034    | 23.55777267 | 0     | 1 |

|             |                 |                            |             |             |       |    |
|-------------|-----------------|----------------------------|-------------|-------------|-------|----|
| 788 PIK3CA  | ENST00000263967 | p.N345K                    | c.1035      | 23.55777267 | 0     | 22 |
| 788 PIK3CA  | ENST00000263967 | p.C378R                    | c.1132      | 2.155005679 | 6.394 | 1  |
| 788 PIK3CA  | ENST00000263967 | p.C378Y                    | c.1133      | 2.155005679 | 6.394 | 1  |
| 788 PIK3CA  | ENST00000263967 | p.PVPHGLEDL447in_frame_del | c.1338_1364 | 2.514557644 | 4.275 | 2  |
| 788 PIK3CA  | ENST00000263967 | p.E469in_frame_insDK       | c.1405_1406 | 0.512273887 | 6.155 | 1  |
| 788 PIK3CA  | ENST00000263967 | p.P471A                    | c.1411      | 6.175116951 | 3.6   | 1  |
| 788 PIK3CA  | ENST00000263967 | p.P471L                    | c.1412      | 6.175116951 | 3.6   | 2  |
| 789 CRYGS   | ENST00000307944 | p.R36C                     | c.106       | 1.35013908  | 0     | 1  |
| 789 CRYGS   | ENST00000307944 | p.R36H                     | c.107       | 1.35013908  | 0     | 1  |
| 789 CRYGS   | ENST00000307944 | p.R79C                     | c.235       | 0.70027816  | 1.514 | 1  |
| 790 ITGB4   | ENST00000450894 | p.R1037W                   | c.3109      | 0.219941727 | 2.549 | 1  |
| 790 ITGB4   | ENST00000450894 | p.R1077H                   | c.3230      | 0.458035078 | 0     | 1  |
| 790 ITGB4   | ENST00000450894 | p.I1102M                   | c.3306      | 0.321107806 | 1.887 | 1  |
| 790 ITGB4   | ENST00000450894 | p.D1104N                   | c.3310      | 0.024202715 | 5.896 | 1  |
| 791 CNP     | ENST00000393892 | p.G334S                    | c.1000      | 0.048900736 | 0     | 1  |
| 791 CNP     | ENST00000393892 | p.R245K                    | c.734       | 0.048900736 | 4.354 | 1  |
| 792 CRYBA4  | ENST00000354760 | p.F110I                    | c.328       | 1.157715805 | 0     | 1  |
| 792 CRYBA4  | ENST00000354760 | p.F110V                    | c.328       | 1.157715805 | 0     | 1  |
| 792 CRYBA4  | ENST00000354760 | p.E138K                    | c.412       | 0.099038106 | 5.196 | 1  |
| 792 CRYBA4  | ENST00000354760 | p.S141P                    | c.421       | 0.262164733 | 2.951 | 1  |
| 792 CRYBA4  | ENST00000354760 | p.Q187L                    | c.560       | 0.043184034 | 9.806 | 1  |
| 793 ERBB3   | ENST00000267101 | p.S345L                    | c.1034      | 0.108142086 | 0     | 1  |
| 793 ERBB3   | ENST00000267101 | p.A378P                    | c.1132      | 0.108142086 | 3.209 | 1  |
| 794 CYP11B2 | ENST00000323110 | p.L382F                    | c.1146      | 0.086809001 | 0     | 1  |
| 794 CYP11B2 | ENST00000323110 | p.F445I                    | c.1333      | 0.076150641 | 3.715 | 1  |
| 794 CYP11B2 | ENST00000323110 | p.R448S                    | c.1342      | 0.014162419 | 7.411 | 1  |
| 794 CYP11B2 | ENST00000323110 | p.M111I                    | c.333       | 0.013069187 | 7.708 | 1  |
| 796 PTPRN   | ENST00000295718 | p.M777I                    | c.2331      | 0.045562793 | 0     | 1  |
| 796 PTPRN   | ENST00000295718 | p.R928H                    | c.2783      | 0.045562793 | 4.456 | 1  |
| 797 CRYBB1  | ENST00000215939 | p.E65K                     | c.193       | 1.14958112  | 0     | 2  |
| 797 CRYBB1  | ENST00000215939 | p.R92H                     | c.275       | 0.299162241 | 2.741 | 1  |
| 798 ETF1    | ENST00000360541 | p.S77F                     | c.230       | 0.013030173 | 0     | 1  |
| 798 ETF1    | ENST00000360541 | p.D113Y                    | c.337       | 0.013030173 | 6.262 | 1  |
| 799 SRSF1   | ENST00000584773 | p.V123L                    | c.367       | 0.18893548  | 0     | 1  |
| 799 SRSF1   | ENST00000584773 | p.D151H                    | c.451       | 0.013046803 | 6.486 | 1  |
| 799 SRSF1   | ENST00000584773 | p.D176G                    | c.527       | 0.024090361 | 6.909 | 1  |
| 799 SRSF1   | ENST00000584773 | p.D195H                    | c.583       | 0.172758649 | 2.561 | 1  |
| 800 COL3A1  | ENST00000304636 | p.K1407R                   | c.4220      | 0.098550022 | 3.343 | 1  |
| 800 COL3A1  | ENST00000304636 | p.R1438I                   | c.4313      | 0.098550022 | 0     | 1  |
| 801 TLL1    | ENST00000507499 | p.E289K                    | c.865       | 0.268264783 | 0     | 1  |
| 801 TLL1    | ENST00000507499 | p.T330A                    | c.988       | 0.190273442 | 2.524 | 1  |
| 801 TLL1    | ENST00000507499 | p.L332V                    | c.994       | 0.110817733 | 3.405 | 1  |
| 802 CDC42   | ENST00000344548 | p.E62D                     | c.186       | 0.153679858 | 2.702 | 1  |
| 802 CDC42   | ENST00000344548 | p.K16R                     | c.47        | 0.153679858 | 0     | 1  |
| 803 PARP15  | ENST00000464300 | p.S536N                    | c.1607      | 0.117437837 | 3.191 | 1  |
| 803 PARP15  | ENST00000464300 | p.S577N                    | c.1730      | 0.122924176 | 0     | 1  |
| 803 PARP15  | ENST00000464300 | p.P637L                    | c.1910      | 0.021362435 | 6.219 | 1  |
| 804 PDE5A   | ENST00000354960 | p.I242V                    | c.724       | 0.027261335 | 0     | 1  |
| 804 PDE5A   | ENST00000354960 | p.L267I                    | c.799       | 0.027261335 | 5.197 | 1  |

|     |         |                 |          |        |             |       |   |
|-----|---------|-----------------|----------|--------|-------------|-------|---|
| 805 | GSTA2   | ENST00000493422 | p.E126D  | c.378  | 0.064168097 | 3.962 | 1 |
| 805 | GSTA2   | ENST00000493422 | p.A2T    | c.4    | 0.064168097 | 0     | 1 |
| 806 | EEF1A1  | ENST00000316292 | p.H349Y  | c.1045 | 0.044718016 | 4.483 | 1 |
| 806 | EEF1A1  | ENST00000316292 | p.T432I  | c.1295 | 0.044718016 | 0     | 1 |
| 807 | MAPK11  | ENST00000330651 | p.R149W  | c.445  | 0.030905341 | 5.016 | 1 |
| 807 | MAPK11  | ENST00000330651 | p.T185M  | c.554  | 0.037474844 | 0     | 1 |
| 807 | MAPK11  | ENST00000330651 | p.A221V  | c.662  | 0.006569503 | 7.25  | 1 |
| 808 | CCNDBP1 | ENST00000300213 | p.L240I  | c.718  | 1.016596237 | 0     | 1 |
| 808 | CCNDBP1 | ENST00000300213 | p.L240R  | c.719  | 1.016596237 | 0     | 1 |
| 808 | CCNDBP1 | ENST00000300213 | p.R305Q  | c.914  | 0.033192475 | 5.913 | 1 |
| 809 | CEL     | ENST00000372080 | p.G129E  | c.386  | 0.102096124 | 3.292 | 1 |
| 809 | CEL     | ENST00000372080 | p.G219A  | c.656  | 0.102096124 | 0     | 1 |
| 810 | TPP1    | ENST00000299427 | p.F356L  | c.1066 | 0.098587241 | 7.802 | 1 |
| 810 | TPP1    | ENST00000299427 | p.A357T  | c.1069 | 0.209955897 | 0     | 1 |
| 810 | TPP1    | ENST00000299427 | p.A380T  | c.1138 | 0.157194304 | 3.276 | 1 |
| 810 | TPP1    | ENST00000299427 | p.G389R  | c.1165 | 0.061513686 | 5.227 | 1 |
| 810 | TPP1    | ENST00000299427 | p.S475L  | c.1424 | 0.0738755   | 3.935 | 1 |
| 810 | TPP1    | ENST00000299427 | p.T322A  | c.964  | 0.11672062  | 6.621 | 1 |
| 811 | TLR4    | ENST00000355622 | p.S164Y  | c.491  | 0.163272177 | 7.633 | 1 |
| 811 | TLR4    | ENST00000355622 | p.K186N  | c.558  | 0.048627205 | 6.823 | 1 |
| 811 | TLR4    | ENST00000355622 | p.I187M  | c.561  | 0.224688085 | 3.707 | 1 |
| 811 | TLR4    | ENST00000355622 | p.M215T  | c.644  | 1.09044412  | 0     | 1 |
| 811 | TLR4    | ENST00000355622 | p.M215I  | c.645  | 1.09044412  | 0     | 1 |
| 812 | DICER1  | ENST00000343455 | p.F1650C | c.4949 | 0.009611651 | 6.701 | 1 |
| 812 | DICER1  | ENST00000343455 | p.S1747L | c.5240 | 0.023242318 | 0     | 1 |
| 812 | DICER1  | ENST00000343455 | p.D1801N | c.5401 | 0.013630667 | 6.197 | 1 |
| 813 | PPIB    | ENST00000300026 | p.D56Y   | c.166  | 0.028242273 | 0     | 1 |
| 813 | PPIB    | ENST00000300026 | p.A200S  | c.598  | 0.028242273 | 5.146 | 1 |
| 814 | SMAD2   | ENST00000402690 | p.F356C  | c.1067 | 0.17749685  | 0     | 1 |
| 814 | SMAD2   | ENST00000402690 | p.R415I  | c.1244 | 0.08892659  | 3.624 | 1 |
| 814 | SMAD2   | ENST00000402690 | p.G421W  | c.1261 | 0.104206094 | 3.375 | 1 |
| 815 | ACBD4   | ENST00000591859 | p.Y46C   | c.137  | 0.003428991 | 8.188 | 1 |
| 815 | ACBD4   | ENST00000591859 | p.R58W   | c.172  | 0.006596882 | 7.244 | 1 |
| 815 | ACBD4   | ENST00000591859 | p.M79I   | c.237  | 0.010025873 | 0     | 1 |
| 816 | GSPT1   | ENST00000563468 | p.L215V  | c.643  | 0.145165326 | 2.922 | 1 |
| 816 | GSPT1   | ENST00000563468 | p.H257Y  | c.769  | 0.208918637 | 0     | 1 |
| 816 | GSPT1   | ENST00000563468 | p.Y279N  | c.835  | 0.076722996 | 3.883 | 1 |
| 816 | GSPT1   | ENST00000563468 | p.P283L  | c.848  | 0.010407756 | 6.765 | 1 |
| 817 | MYO10   | ENST00000513610 | p.R1643Q | c.4928 | 0.084611642 | 0     | 1 |
| 817 | MYO10   | ENST00000513610 | p.L2000F | c.5998 | 0.084611642 | 3.563 | 1 |
| 818 | CD1B    | ENST00000368168 | p.H56Y   | c.166  | 0.036117808 | 0     | 1 |
| 818 | CD1B    | ENST00000368168 | p.V191I  | c.571  | 0.029732035 | 5.64  | 1 |
| 818 | CD1B    | ENST00000368168 | p.H29Y   | c.85   | 0.016064279 | 5.96  | 1 |
| 819 | DPYSL2  | ENST00000311151 | p.D406N  | c.1216 | 0.120002489 | 0     | 1 |
| 819 | DPYSL2  | ENST00000311151 | p.Q449K  | c.1345 | 0.017010016 | 6.021 | 1 |
| 819 | DPYSL2  | ENST00000311151 | p.R467C  | c.1399 | 0.106214088 | 3.257 | 1 |
| 820 | VRK2    | ENST00000340157 | p.I214M  | c.642  | 0.064301669 | 3.959 | 1 |
| 820 | VRK2    | ENST00000340157 | p.K223N  | c.669  | 0.003863168 | 8.016 | 1 |
| 820 | VRK2    | ENST00000340157 | p.P257L  | c.770  | 0.068164837 | 0     | 1 |

|            |                 |         |        |             |       |   |
|------------|-----------------|---------|--------|-------------|-------|---|
| 821 ME2    | ENST00000321341 | p.L288V | c.862  | 0.011686607 | 0     | 1 |
| 821 ME2    | ENST00000321341 | p.E329Q | c.985  | 0.011686607 | 6.419 | 1 |
| 822 STK16  | ENST00000396738 | p.R50Q  | c.149  | 2.00242887  | 0     | 3 |
| 822 STK16  | ENST00000396738 | p.D166E | c.498  | 0.052688895 | 9.687 | 1 |
| 822 STK16  | ENST00000396738 | p.G27W  | c.79   | 0.003647092 | 9.684 | 1 |
| 823 DDAH1  | ENST00000284031 | p.L114F | c.340  | 0.039609766 | 0     | 1 |
| 823 DDAH1  | ENST00000284031 | p.Q195H | c.585  | 0.039609766 | 4.658 | 1 |
| 824 RXRA   | ENST00000481739 | p.Y249F | c.746  | 0.143338328 | 2.913 | 1 |
| 824 RXRA   | ENST00000481739 | p.T278I | c.833  | 0.01253282  | 6.498 | 1 |
| 824 RXRA   | ENST00000481739 | p.R316L | c.947  | 0.145041906 | 0     | 1 |
| 824 RXRA   | ENST00000481739 | p.S317F | c.950  | 0.010307618 | 9.693 | 1 |
| 825 GBE1   | ENST00000429644 | p.P552S | c.1654 | 0.086509357 | 3.531 | 1 |
| 825 GBE1   | ENST00000429644 | p.A247V | c.740  | 0.086509357 | 0     | 1 |
| 826 TBX5   | ENST00000405440 | p.I54M  | c.162  | 0.09422026  | 3.449 | 1 |
| 826 TBX5   | ENST00000405440 | p.V56A  | c.167  | 0.031607332 | 5.11  | 1 |
| 826 TBX5   | ENST00000405440 | p.T92K  | c.275  | 0.120524682 | 0     | 1 |
| 827 STAT1  | ENST00000409465 | p.E39V  | c.116  | 0.020976612 | 0     | 1 |
| 827 STAT1  | ENST00000409465 | p.E6K   | c.16   | 0.009426906 | 6.729 | 1 |
| 827 STAT1  | ENST00000409465 | p.I105T | c.314  | 0.011549706 | 6.436 | 1 |
| 828 CNTN1  | ENST0000051295  | p.K818N | c.2454 | 0.027212086 | 8.088 | 1 |
| 828 CNTN1  | ENST0000051295  | p.S826T | c.2476 | 0.388772762 | 9.46  | 1 |
| 828 CNTN1  | ENST0000051295  | p.R843P | c.2528 | 0.123894905 | 8.193 | 1 |
| 828 CNTN1  | ENST0000051295  | p.A847T | c.2539 | 0.271296471 | 4.811 | 1 |
| 828 CNTN1  | ENST0000051295  | p.Q876E | c.2626 | 0.560840708 | 2.468 | 1 |
| 828 CNTN1  | ENST0000051295  | p.E897Q | c.2689 | 1.224877827 | 0     | 1 |
| 828 CNTN1  | ENST0000051295  | p.E897D | c.2691 | 1.224877827 | 0     | 1 |
| 829 ALPP   | ENST00000392027 | p.R336C | c.1006 | 0.148136596 | 2.755 | 1 |
| 829 ALPP   | ENST00000392027 | p.M296R | c.887  | 0.148136596 | 0     | 1 |
| 830 IFNA13 | ENST00000449498 | p.R36W  | c.106  | 0.045221467 | 7.01  | 1 |
| 830 IFNA13 | ENST00000449498 | p.E112K | c.334  | 1.007758535 | 0     | 2 |
| 831 RET    | ENST00000355710 | p.V706M | c.2116 | 0.02245219  | 0     | 1 |
| 831 RET    | ENST00000355710 | p.R959W | c.2875 | 0.02245219  | 5.477 | 1 |
| 832 PLG    | ENST00000308192 | p.S564L | c.1691 | 0.051376508 | 5.256 | 1 |
| 832 PLG    | ENST00000308192 | p.P589T | c.1765 | 0.080127409 | 0     | 1 |
| 832 PLG    | ENST00000308192 | p.P630H | c.1889 | 0.030143693 | 5.052 | 1 |
| 832 PLG    | ENST00000308192 | p.V681L | c.2041 | 0.049022318 | 5.392 | 1 |
| 833 MMP2   | ENST00000570308 | p.I409N | c.1226 | 0.071087037 | 7.575 | 1 |
| 833 MMP2   | ENST00000570308 | p.R424S | c.1270 | 0.512881167 | 0     | 1 |
| 833 MMP2   | ENST00000570308 | p.S579F | c.1736 | 0.342162756 | 1.853 | 1 |
| 833 MMP2   | ENST00000570308 | p.D580E | c.1740 | 0.202889019 | 2.743 | 1 |
| 833 MMP2   | ENST00000570308 | p.W581R | c.1741 | 0.18054934  | 3.618 | 1 |
| 834 PYGL   | ENST00000216392 | p.R491S | c.1471 | 0.008496003 | 0     | 1 |
| 834 PYGL   | ENST00000216392 | p.K681T | c.2042 | 0.008496003 | 6.879 | 1 |
| 835 KYNU   | ENST00000264170 | p.G73E  | c.218  | 1.108217071 | 0     | 2 |
| 835 KYNU   | ENST00000264170 | p.K276T | c.827  | 0.216434141 | 3.208 | 1 |
| 836 PTPRM  | ENST00000400060 | p.E505D | c.1515 | 0.012413038 | 0     | 1 |
| 836 PTPRM  | ENST00000400060 | p.G543E | c.1628 | 0.012413038 | 6.332 | 1 |
| 837 SI     | ENST00000264382 | p.E643K | c.1927 | 0.029428065 | 6.687 | 1 |
| 837 SI     | ENST00000264382 | p.D751Y | c.2251 | 0.03184035  | 4.973 | 1 |

|               |                 |          |           |             |       |   |
|---------------|-----------------|----------|-----------|-------------|-------|---|
| 837 SI        | ENST00000264382 | p.A784T  | c.2350    | 0.041545727 | 0     | 1 |
| 838 GABARAPL1 | ENST00000543602 | p.P42S   | c.124     | 0.024860515 | 5.33  | 1 |
| 838 GABARAPL1 | ENST00000543602 | p.R67I   | c.200     | 0.024860515 | 0     | 1 |
| 839 SMAD3     | ENST00000327367 | p.G379A  | c.1136    | 0.023438109 | 5.415 | 1 |
| 839 SMAD3     | ENST00000327367 | p.A382V  | c.1145    | 0.020193013 | 5.63  | 1 |
| 839 SMAD3     | ENST00000327367 | p.V331I  | c.991     | 0.043631122 | 0     | 1 |
| 841 SERPINC1  | ENST00000367698 | p.W339R  | c.1015    | 0.091087925 | 0     | 1 |
| 841 SERPINC1  | ENST00000367698 | p.R294C  | c.880     | 0.009017855 | 6.793 | 1 |
| 841 SERPINC1  | ENST00000367698 | p.A296D  | c.887     | 0.08207007  | 3.607 | 1 |
| 842 NID1      | ENST00000264187 | p.R1004G | c.3010    | 0.062456693 | 5.001 | 1 |
| 842 NID1      | ENST00000264187 | p.R1033C | c.3097    | 1.031228347 | 0     | 2 |
| 843 PLXNB2    | ENST00000359337 | p.N1483I | c.4448    | 0.099995016 | 3.322 | 1 |
| 843 PLXNB2    | ENST00000359337 | p.M1546T | c.4637    | 0.099995016 | 0     | 1 |
| 844 ITGA1     | ENST00000282588 | p.R304Q  | c.911     | 0.339151082 | 1.56  | 1 |
| 844 ITGA1     | ENST00000282588 | p.E333K  | c.997     | 0.339151082 | 0     | 1 |
| 845 FABP3     | ENST00000373713 | p.A4T    | c.10      | 1.088572337 | 0     | 2 |
| 845 FABP3     | ENST00000373713 | p.R107L  | c.320     | 0.177144675 | 3.497 | 1 |
| 846 GRM3      | ENST00000361669 | p.N467S  | c.1400    | 0.175490942 | 2.879 | 1 |
| 846 GRM3      | ENST00000361669 | p.W297S  | c.890     | 0.330536527 | 1.781 | 1 |
| 846 GRM3      | ENST00000361669 | p.G319N  | c.955_956 | 0.426917682 | 0     | 1 |
| 847 GCK       | ENST00000345378 | p.R64H   | c.191     | 0.346538029 | 2.934 | 1 |
| 847 GCK       | ENST00000345378 | p.T66I   | c.197     | 0.116769709 | 3.942 | 1 |
| 847 GCK       | ENST00000345378 | p.P67S   | c.199     | 0.191708187 | 3.775 | 1 |
| 847 GCK       | ENST00000345378 | p.E158K  | c.472     | 0.046417816 | 8.744 | 1 |
| 847 GCK       | ENST00000345378 | p.D161N  | c.481     | 0.108624616 | 6.448 | 1 |
| 847 GCK       | ENST00000345378 | p.A209V  | c.626     | 0.088006224 | 6.772 | 1 |
| 847 GCK       | ENST00000345378 | p.Y216F  | c.647     | 0.265900781 | 7.892 | 1 |
| 847 GCK       | ENST00000345378 | p.E217K  | c.649     | 0.068506194 | 9.144 | 1 |
| 847 GCK       | ENST00000345378 | p.E222K  | c.664     | 0.220047618 | 2.551 | 1 |
| 847 GCK       | ENST00000345378 | p.R251S  | c.751     | 0.46851438  | 0     | 1 |
| 848 BIN1      | ENST00000316724 | p.M522I  | c.1566    | 0.128069603 | 2.965 | 1 |
| 848 BIN1      | ENST00000316724 | p.P551L  | c.1652    | 0.128069603 | 0     | 1 |
| 849 C6        | ENST00000263413 | p.R356Q  | c.1067    | 2.014144852 | 0     | 3 |
| 849 C6        | ENST00000263413 | p.P95T   | c.283     | 0.027776794 | 7.261 | 1 |
| 849 C6        | ENST00000263413 | p.R104I  | c.311     | 0.022875744 | 7.035 | 1 |
| 850 C3        | ENST00000245907 | p.R505C  | c.1513    | 0.032504981 | 5.494 | 1 |
| 850 C3        | ENST00000245907 | p.Y534C  | c.1601    | 0.133294513 | 0     | 1 |
| 850 C3        | ENST00000245907 | p.S27F   | c.80      | 0.121421139 | 3.17  | 1 |
| 852 PAH       | ENST00000553106 | p.G289R  | c.865     | 0.023232883 | 9.875 | 1 |
| 852 PAH       | ENST00000553106 | p.H290Y  | c.868     | 0.096727009 | 7.735 | 1 |
| 852 PAH       | ENST00000553106 | p.S303F  | c.908     | 1.060546697 | 0     | 2 |
| 852 PAH       | ENST00000553106 | p.V329L  | c.985     | 0.214687323 | 4.19  | 1 |
| 853 LEPR      | ENST00000349533 | p.V543A  | c.1628    | 0.004896613 | 0     | 1 |
| 853 LEPR      | ENST00000349533 | p.R573C  | c.1717    | 0.004896613 | 7.674 | 1 |
| 854 ACACB     | ENST00000338432 | p.R615W  | c.1843    | 0.011581774 | 6.432 | 1 |
| 854 ACACB     | ENST00000338432 | p.G256R  | c.766     | 0.011581774 | 0     | 1 |
| 855 MYH7      | ENST00000355349 | p.R453C  | c.1357    | 1.178235863 | 6.137 | 1 |
| 855 MYH7      | ENST00000355349 | p.R453H  | c.1358    | 1.178235863 | 6.137 | 1 |
| 855 MYH7      | ENST00000355349 | p.G458R  | c.1372    | 0.677145597 | 2.245 | 1 |

|              |                 |                      |             |             |       |   |
|--------------|-----------------|----------------------|-------------|-------------|-------|---|
| 855 MYH7     | ENST00000355349 | p.V670I              | c.2008      | 0.325019834 | 9.145 | 1 |
| 855 MYH7     | ENST00000355349 | p.S173F              | c.518       | 0.322045955 | 4.561 | 1 |
| 855 MYH7     | ENST00000355349 | p.L175R              | c.524       | 0.298690381 | 6.964 | 1 |
| 855 MYH7     | ENST00000355349 | p.R249Q              | c.746       | 1.293581086 | 0     | 2 |
| 855 MYH7     | ENST00000355349 | p.S260Y              | c.779       | 0.304247411 | 8.918 | 1 |
| 856 SEC24A   | ENST00000398844 | p.L678F              | c.2034      | 0.070127052 | 4.367 | 1 |
| 856 SEC24A   | ENST00000398844 | p.S681C              | c.2042      | 0.113687134 | 3.41  | 1 |
| 856 SEC24A   | ENST00000398844 | p.G682V              | c.2045      | 0.16935883  | 2.771 | 1 |
| 856 SEC24A   | ENST00000398844 | p.R864L              | c.2591_2592 | 0.016711854 | 6.214 | 1 |
| 856 SEC24A   | ENST00000398844 | p.L906V              | c.2716      | 0.302513775 | 0     | 1 |
| 857 FSHR     | ENST00000406846 | p.P355L              | c.1064      | 1.005835209 | 0     | 1 |
| 857 FSHR     | ENST00000406846 | p.P355Q              | c.1064      | 1.005835209 | 0     | 1 |
| 857 FSHR     | ENST00000406846 | p.Y271H              | c.811       | 0.02657605  | 7.421 | 1 |
| 858 DLD      | ENST00000205402 | p.G154E              | c.461       | 0.138792354 | 0     | 1 |
| 858 DLD      | ENST00000205402 | p.K320M              | c.959       | 0.138792354 | 2.849 | 1 |
| 859 HSPA6    | ENST00000309758 | p.V337I              | c.1009      | 0.075239296 | 6.831 | 1 |
| 859 HSPA6    | ENST00000309758 | p.E360K              | c.1078      | 1.008783429 | 0     | 1 |
| 859 HSPA6    | ENST00000309758 | p.E360V              | c.1079      | 1.008783429 | 0     | 1 |
| 860 SMYD3    | ENST00000541742 | p.D215N              | c.643       | 0.028164077 | 0     | 1 |
| 860 SMYD3    | ENST00000541742 | p.I266M              | c.798       | 0.028164077 | 5.15  | 1 |
| 861 OGT      | ENST00000373719 | p.P713S              | c.2137      | 0.007726335 | 7.016 | 1 |
| 861 OGT      | ENST00000373719 | p.DSL746in_frame_del | c.2232_2240 | 0.101390894 | 3.302 | 1 |
| 861 OGT      | ENST00000373719 | p.N773I              | c.2318      | 0.10911723  | 0     | 1 |
| 862 KITLG    | ENST00000228280 | p.D39N               | c.115       | 0.019955406 | 6.339 | 1 |
| 862 KITLG    | ENST00000228280 | p.V40F               | c.118       | 0.013842199 | 7.257 | 1 |
| 862 KITLG    | ENST00000228280 | p.P59S               | c.175       | 0.053988958 | 8.42  | 1 |
| 862 KITLG    | ENST00000228280 | p.M61I               | c.183       | 0.154351083 | 2.76  | 1 |
| 862 KITLG    | ENST00000228280 | p.H67Y               | c.199       | 0.120714491 | 8.291 | 1 |
| 862 KITLG    | ENST00000228280 | p.V74I               | c.220       | 0.128166482 | 7.989 | 1 |
| 862 KITLG    | ENST00000228280 | p.R146I              | c.437       | 0.176563234 | 0     | 1 |
| 863 AADAT    | ENST00000353187 | p.H95Y               | c.283       | 0.122342706 | 0     | 1 |
| 863 AADAT    | ENST00000353187 | p.S248F              | c.743       | 0.122342706 | 3.031 | 1 |
| 864 RAB9B    | ENST00000243298 | p.I60V               | c.178       | 0.061213769 | 0     | 1 |
| 864 RAB9B    | ENST00000243298 | p.V28I               | c.82        | 0.061213769 | 4.03  | 1 |
| 865 SERPINC1 | ENST00000367698 | p.K43N               | c.129       | 0.146054914 | 3.135 | 1 |
| 865 SERPINC1 | ENST00000367698 | p.P48S               | c.142       | 0.103143486 | 4.317 | 1 |
| 865 SERPINC1 | ENST00000367698 | p.M49I               | c.147       | 0.23041645  | 3.284 | 1 |
| 865 SERPINC1 | ENST00000367698 | p.R79H               | c.236       | 0.211016204 | 3.047 | 1 |
| 865 SERPINC1 | ENST00000367698 | p.L124Q              | c.371       | 0.240940002 | 6.76  | 1 |
| 865 SERPINC1 | ENST00000367698 | p.E145K              | c.433       | 0.217709264 | 7.407 | 1 |
| 865 SERPINC1 | ENST00000367698 | p.F153L              | c.459       | 0.402780647 | 0     | 1 |
| 866 FLNA     | ENST00000438732 | p.S196C              | c.587       | 0.045579547 | 4.736 | 1 |
| 867 ARHGAP20 | ENST00000260283 | p.F398S              | c.1193      | 0.035756551 | 6.925 | 1 |
| 867 ARHGAP20 | ENST00000260283 | p.L438R              | c.1313      | 0.167980802 | 0     | 1 |
| 867 ARHGAP20 | ENST00000260283 | p.L488R              | c.1463      | 0.102615892 | 4.017 | 1 |
| 867 ARHGAP20 | ENST00000260283 | p.P515A              | c.1543      | 0.008980429 | 6.799 | 1 |
| 867 ARHGAP20 | ENST00000260283 | p.S516R              | c.1546      | 0.09450067  | 3.49  | 1 |
| 868 HDAC4    | ENST00000345617 | p.A774V              | c.2321      | 0.073607674 | 3.764 | 1 |
| 868 HDAC4    | ENST00000345617 | p.S817Y              | c.2450      | 0.081656533 | 0     | 1 |

|             |                 |          |           |             |       |   |
|-------------|-----------------|----------|-----------|-------------|-------|---|
| 868 HDAC4   | ENST00000345617 | p.S930T  | c.2788    | 0.008048859 | 6.957 | 1 |
| 869 GLUL    | ENST00000311223 | p.V101D  | c.302     | 0.028340323 | 0     | 1 |
| 869 GLUL    | ENST00000311223 | p.P326R  | c.977     | 0.028340323 | 5.141 | 1 |
| 870 ADPRHL2 | ENST00000373178 | p.S185F  | c.554     | 0.101110169 | 0     | 1 |
| 870 ADPRHL2 | ENST00000373178 | p.S228F  | c.683_684 | 0.101110169 | 3.306 | 1 |
| 871 ACE2    | ENST00000427411 | p.L450P  | c.1349    | 0.040455802 | 0     | 1 |
| 871 ACE2    | ENST00000427411 | p.V581I  | c.1741    | 0.016458766 | 5.925 | 1 |
| 871 ACE2    | ENST00000427411 | p.R273K  | c.818     | 0.023997035 | 5.381 | 1 |
| 872 YWHAG   | ENST00000307630 | p.D203N  | c.607     | 0.009459633 | 6.724 | 1 |
| 872 YWHAG   | ENST00000307630 | p.D241N  | c.721     | 0.009459633 | 0     | 1 |
| 873 AHCY    | ENST00000217426 | p.R196L  | c.587     | 0.012949139 | 6.271 | 1 |
| 873 AHCY    | ENST00000217426 | p.R233Q  | c.698     | 0.012949139 | 0     | 1 |
| 874 TF      | ENST00000402696 | p.T440I  | c.1319    | 0.02875351  | 0     | 1 |
| 874 TF      | ENST00000402696 | p.C656Y  | c.1967    | 0.015495574 | 6.012 | 1 |
| 874 TF      | ENST00000402696 | p.R663K  | c.1988    | 0.013257936 | 6.237 | 1 |
| 875 GSTM3   | ENST00000256594 | p.C91F   | c.272     | 0.086665385 | 0     | 1 |
| 875 GSTM3   | ENST00000256594 | p.A153V  | c.458     | 0.014715479 | 6.231 | 1 |
| 875 GSTM3   | ENST00000256594 | p.K156R  | c.467     | 0.047424542 | 4.498 | 1 |
| 875 GSTM3   | ENST00000256594 | p.L157V  | c.469     | 0.039375901 | 5.103 | 1 |
| 876 NRP1    | ENST00000374867 | p.E460Q  | c.1378    | 1.01748183  | 0     | 2 |
| 876 NRP1    | ENST00000374867 | p.R577G  | c.1729    | 0.070990753 | 5.838 | 1 |
| 877 MYO1C   | ENST00000359786 | p.S196C  | c.586     | 0.007183985 | 7.121 | 1 |
| 877 MYO1C   | ENST00000359786 | p.H238Y  | c.712     | 0.010663254 | 0     | 1 |
| 877 MYO1C   | ENST00000359786 | p.N279S  | c.836     | 0.003479269 | 8.167 | 1 |
| 878 PARP1   | ENST00000366794 | p.R735C  | c.2203    | 0.098270405 | 6.28  | 1 |
| 878 PARP1   | ENST00000366794 | p.N1008Y | c.3022    | 1.01286861  | 0     | 1 |
| 878 PARP1   | ENST00000366794 | p.N1008S | c.3023    | 1.01286861  | 0     | 1 |
| 879 PDILT   | ENST00000302451 | p.V336F  | c.1006    | 1.102948877 | 0     | 1 |
| 879 PDILT   | ENST00000302451 | p.V336I  | c.1006    | 1.102948877 | 0     | 1 |
| 879 PDILT   | ENST00000302451 | p.L279P  | c.836     | 0.21478222  | 3.28  | 1 |
| 880 CECR1   | ENST00000262607 | p.D441N  | c.1321    | 0.011202775 | 6.48  | 1 |
| 880 CECR1   | ENST00000262607 | p.A109V  | c.326     | 0.026473934 | 6.627 | 1 |
| 880 CECR1   | ENST00000262607 | p.F235L  | c.703     | 0.031012231 | 0     | 1 |
| 880 CECR1   | ENST00000262607 | p.F276V  | c.826     | 0.024868612 | 6.689 | 1 |
| 881 THBS2   | ENST00000366787 | p.W700R  | c.2098    | 0.165418556 | 8.798 | 1 |
| 881 THBS2   | ENST00000366787 | p.L723V  | c.2167    | 0.068816999 | 5.073 | 1 |
| 881 THBS2   | ENST00000366787 | p.S726Y  | c.2177    | 0.187563254 | 6.006 | 1 |
| 881 THBS2   | ENST00000366787 | p.D738N  | c.2212    | 0.03569832  | 5.808 | 1 |
| 881 THBS2   | ENST00000366787 | p.R982C  | c.2944    | 1.065364073 | 0     | 2 |
| 882 CBX1    | ENST00000393408 | p.N50S   | c.149     | 0.102450576 | 3.287 | 1 |
| 882 CBX1    | ENST00000393408 | p.L27I   | c.79      | 0.102450576 | 0     | 1 |
| 883 PRKAA2  | ENST00000371244 | p.E168K  | c.502     | 1.009545259 | 0     | 2 |
| 883 PRKAA2  | ENST00000371244 | p.G192C  | c.574     | 0.019090517 | 6.711 | 1 |
| 884 MMP2    | ENST00000570308 | p.P41S   | c.121     | 1.151287901 | 0     | 1 |
| 884 MMP2    | ENST00000570308 | p.P41L   | c.122     | 1.151287901 | 0     | 1 |
| 884 MMP2    | ENST00000570308 | p.P121T  | c.361     | 0.350603322 | 2.816 | 1 |
| 884 MMP2    | ENST00000570308 | p.C157F  | c.470     | 0.10254304  | 6.751 | 1 |
| 885 RAE1    | ENST00000527947 | p.A232V  | c.695     | 0.017595262 | 7.152 | 1 |
| 885 RAE1    | ENST00000527947 | p.A280T  | c.838     | 1.057903445 | 0     | 2 |

|               |                 |          |           |             |       |   |
|---------------|-----------------|----------|-----------|-------------|-------|---|
| 885 RAE1      | ENST00000527947 | p.C321S  | c.961     | 0.100379629 | 4.393 | 1 |
| 885 RAE1      | ENST00000527947 | p.N324S  | c.971     | 0.013660992 | 8.254 | 1 |
| 886 TMPRSS11E | ENST00000305363 | p.M256I  | c.768     | 0.048712298 | 4.46  | 1 |
| 886 TMPRSS11E | ENST00000305363 | p.R258L  | c.773_774 | 0.075368507 | 3.794 | 1 |
| 886 TMPRSS11E | ENST00000305363 | p.P288L  | c.863     | 0.117529491 | 0     | 1 |
| 887 ETF1      | ENST00000360541 | p.K108R  | c.323     | 0.017361074 | 0     | 1 |
| 887 ETF1      | ENST00000360541 | p.F131V  | c.391     | 0.017361074 | 5.848 | 1 |
| 888 CFH       | ENST00000367429 | p.D772N  | c.2314    | 0.050205875 | 5.316 | 1 |
| 888 CFH       | ENST00000367429 | p.G795R  | c.2383    | 1.025102937 | 0     | 1 |
| 888 CFH       | ENST00000367429 | p.G795A  | c.2384    | 1.025102937 | 0     | 1 |
| 889 PAPOLG    | ENST00000238714 | p.N238S  | c.713     | 0.032734805 | 5.034 | 1 |
| 889 PAPOLG    | ENST00000238714 | p.L243F  | c.727     | 0.083360165 | 3.786 | 1 |
| 889 PAPOLG    | ENST00000238714 | p.V284M  | c.850     | 0.005850087 | 8.318 | 1 |
| 889 PAPOLG    | ENST00000238714 | p.T325M  | c.974     | 0.10614939  | 0     | 1 |
| 890 MR1       | ENST00000367580 | p.L220F  | c.658     | 0.009355302 | 0     | 1 |
| 890 MR1       | ENST00000367580 | p.P292L  | c.875     | 0.009355302 | 6.74  | 1 |
| 891 CD1D      | ENST00000368171 | p.R219H  | c.656     | 0.173005187 | 7.281 | 1 |
| 891 CD1D      | ENST00000368171 | p.R240W  | c.718     | 1.140477083 | 0     | 1 |
| 891 CD1D      | ENST00000368171 | p.R240Q  | c.719     | 1.140477083 | 0     | 1 |
| 891 CD1D      | ENST00000368171 | p.V269M  | c.805     | 0.252694387 | 4.517 | 1 |
| 891 CD1D      | ENST00000368171 | p.G272V  | c.815     | 0.19648918  | 3.468 | 1 |
| 892 HAO1      | ENST00000378789 | p.M105I  | c.315     | 1.008930768 | 0     | 2 |
| 892 HAO1      | ENST00000378789 | p.I317M  | c.951     | 0.024922105 | 6.807 | 1 |
| 893 BPIFA1    | ENST00000375413 | p.H182R  | c.545     | 0.099255466 | 3.35  | 1 |
| 893 BPIFA1    | ENST00000375413 | p.S183F  | c.548     | 0.016572245 | 6.374 | 1 |
| 893 BPIFA1    | ENST00000375413 | p.P216S  | c.646     | 0.110129889 | 0     | 1 |
| 894 AOC1      | ENST00000416793 | p.D661N  | c.1981    | 0.023672477 | 6.16  | 1 |
| 894 AOC1      | ENST00000416793 | p.R141G  | c.421     | 0.150392751 | 0     | 1 |
| 894 AOC1      | ENST00000416793 | p.R197C  | c.589     | 0.138315618 | 2.874 | 1 |
| 895 PTPRD     | ENST00000356435 | p.P526L  | c.1577    | 0.341007632 | 0     | 1 |
| 895 PTPRD     | ENST00000356435 | p.A602V  | c.1805    | 0.179297786 | 2.731 | 1 |
| 895 PTPRD     | ENST00000356435 | p.R603S  | c.1809    | 0.219062339 | 2.393 | 1 |
| 896 ECHS1     | ENST00000368547 | p.A84V   | c.251     | 0.041035035 | 4.607 | 1 |
| 896 ECHS1     | ENST00000368547 | p.A230V  | c.689     | 0.041035035 | 0     | 1 |
| 897 PLXNB1    | ENST00000296440 | p.R1801C | c.5401    | 0.016119407 | 0     | 1 |
| 897 PLXNB1    | ENST00000296440 | p.R1832H | c.5495    | 0.006905684 | 7.178 | 1 |
| 897 PLXNB1    | ENST00000296440 | p.P1851S | c.5551    | 0.009213723 | 6.762 | 1 |
| 898 PDK4      | ENST00000005178 | p.F344L  | c.1030    | 0.064586841 | 4.115 | 1 |
| 898 PDK4      | ENST00000005178 | p.Q345L  | c.1034    | 0.100200517 | 3.436 | 1 |
| 898 PDK4      | ENST00000005178 | p.E370K  | c.1108    | 0.176846391 | 0     | 1 |
| 898 PDK4      | ENST00000005178 | p.R301I  | c.902     | 0.030750862 | 5.225 | 1 |
| 899 PROZ      | ENST00000342783 | p.T338M  | c.1013    | 0.106433874 | 0     | 1 |
| 899 PROZ      | ENST00000342783 | p.Q213H  | c.639     | 0.018119953 | 6.405 | 1 |
| 899 PROZ      | ENST00000342783 | p.D278N  | c.832     | 0.030219087 | 5.141 | 1 |
| 899 PROZ      | ENST00000342783 | p.A298V  | c.893     | 0.074491134 | 3.915 | 1 |
| 900 SERPINB3  | ENST00000283752 | p.S143T  | c.428     | 0.018278903 | 9.337 | 1 |
| 900 SERPINB3  | ENST00000283752 | p.P164S  | c.490     | 2.001546261 | 0     | 3 |
| 901 GBA       | ENST00000327247 | p.M374T  | c.1121    | 0.224612989 | 0     | 1 |
| 901 GBA       | ENST00000327247 | p.R434C  | c.1300    | 0.088480421 | 3.697 | 1 |



|     |         |                 |          |             |             |       |   |
|-----|---------|-----------------|----------|-------------|-------------|-------|---|
| 901 | GBA     | ENST00000327247 | p.W267C  | c.801       | 0.10494749  | 3.431 | 1 |
| 901 | GBA     | ENST00000327247 | p.L30I   | c.88        | 0.064092213 | 4.19  | 1 |
| 902 | CENPE   | ENST00000265148 | p.L126I  | c.376       | 0.004307301 | 0     | 1 |
| 902 | CENPE   | ENST00000265148 | p.E170K  | c.508       | 0.004307301 | 7.859 | 1 |
| 903 | HMGCR   | ENST00000287936 | p.R495H  | c.1484      | 0.007899626 | 0     | 1 |
| 903 | HMGCR   | ENST00000287936 | p.C527Y  | c.1580      | 0.007899626 | 6.984 | 1 |
| 904 | XDH     | ENST00000379416 | p.P577L  | c.1730      | 0.101915767 | 4.354 | 1 |
| 904 | XDH     | ENST00000379416 | p.P1058S | c.3172      | 0.042952269 | 8.964 | 1 |
| 904 | XDH     | ENST00000379416 | p.S108N  | c.323       | 0.185619855 | 0     | 1 |
| 904 | XDH     | ENST00000379416 | p.S194F  | c.581       | 0.14678188  | 2.892 | 1 |
| 905 | ACADM   | ENST00000370834 | p.P92T   | c.274       | 0.036931611 | 4.759 | 1 |
| 905 | ACADM   | ENST00000370834 | p.K175N  | c.525       | 0.036931611 | 0     | 1 |
| 906 | PDE10A  | ENST00000539869 | p.P354A  | c.1060      | 0.183469387 | 0     | 1 |
| 906 | PDE10A  | ENST00000539869 | p.R375L  | c.1124      | 0.136127921 | 3.405 | 1 |
| 906 | PDE10A  | ENST00000539869 | p.S401T  | c.1202      | 0.130788235 | 3.489 | 1 |
| 907 | UBE3A   | ENST00000397954 | p.F767L  | c.2301      | 0.007635826 | 0     | 1 |
| 907 | UBE3A   | ENST00000397954 | p.R836K  | c.2507      | 0.007635826 | 7.033 | 1 |
| 908 | G6PD    | ENST00000369620 | p.E414K  | c.1240      | 1.036524289 | 7.014 | 2 |
| 908 | G6PD    | ENST00000369620 | p.R439L  | c.1316      | 0.083817368 | 4.775 | 1 |
| 909 | CSF2RA  | ENST00000417535 | p.H15P   | c.44        | 0.008172539 | 6.935 | 1 |
| 909 | CSF2RA  | ENST00000417535 | p.P220S  | c.658       | 0.009566107 | 0     | 1 |
| 909 | CSF2RA  | ENST00000417535 | p.D250Y  | c.748       | 0.001393569 | 9.487 | 1 |
| 910 | PPP2R5C | ENST00000422945 | p.S367F  | c.1100      | 0.078617811 | 3.669 | 1 |
| 910 | PPP2R5C | ENST00000422945 | p.P403S  | c.1207      | 0.078617811 | 0     | 1 |
| 911 | CUL1    | ENST00000602748 | p.Y466S  | c.1397      | 0.238099601 | 3.955 | 1 |
| 911 | CUL1    | ENST00000602748 | p.E499D  | c.1497      | 0.164281548 | 7.698 | 1 |
| 911 | CUL1    | ENST00000602748 | p.R506S  | c.1516      | 1.243237414 | 0     | 1 |
| 911 | CUL1    | ENST00000602748 | p.R506H  | c.1517      | 1.243237414 | 0     | 1 |
| 911 | CUL1    | ENST00000602748 | p.G543W  | c.1626_1627 | 1.173844947 | 3.683 | 1 |
| 911 | CUL1    | ENST00000602748 | p.G543R  | c.1627      | 1.173844947 | 3.683 | 1 |
| 911 | CUL1    | ENST00000602748 | p.R577Q  | c.1730      | 0.049726298 | 5.778 | 1 |
| 912 | GRIA2   | ENST00000296526 | p.Y192H  | c.574       | 0.090938795 | 8.129 | 1 |
| 912 | GRIA2   | ENST00000296526 | p.R193Q  | c.578       | 1.046201749 | 0     | 2 |
| 912 | GRIA2   | ENST00000296526 | p.Q222H  | c.666       | 0.178592421 | 4.552 | 1 |
| 913 | MYL6B   | ENST00000550443 | p.F69I   | c.205       | 0.008303054 | 0     | 1 |
| 913 | MYL6B   | ENST00000550443 | p.G97D   | c.290       | 0.007319699 | 7.094 | 1 |
| 913 | MYL6B   | ENST00000550443 | p.A133T  | c.397       | 0.00337298  | 9.99  | 1 |
| 914 | KDM8    | ENST00000441782 | p.M371T  | c.1112      | 0.092804721 | 0     | 1 |
| 914 | KDM8    | ENST00000441782 | p.L261V  | c.781       | 0.076628253 | 3.731 | 1 |
| 914 | KDM8    | ENST00000441782 | p.A268T  | c.802       | 0.018811434 | 5.837 | 1 |
| 915 | TRIM45  | ENST00000256649 | p.V443I  | c.1327      | 0.181369026 | 2.463 | 1 |
| 915 | TRIM45  | ENST00000256649 | p.T478A  | c.1432      | 0.181369026 | 0     | 1 |
| 916 | NEO1    | ENST00000339362 | p.Q662H  | c.1986      | 0.092847058 | 3.429 | 1 |
| 916 | NEO1    | ENST00000339362 | p.E684D  | c.2052      | 0.092847058 | 0     | 1 |
| 917 | PRKCA   | ENST00000413366 | p.I106F  | c.316       | 0.004074955 | 0     | 1 |
| 917 | PRKCA   | ENST00000413366 | p.D133N  | c.397       | 0.004074955 | 7.939 | 1 |
| 918 | HK1     | ENST00000448642 | p.T492M  | c.1475      | 0.01996256  | 9.484 | 1 |
| 918 | HK1     | ENST00000448642 | p.L118V  | c.352       | 0.186233184 | 2.503 | 1 |
| 918 | HK1     | ENST00000448642 | p.G122E  | c.365       | 0.012721304 | 6.531 | 1 |

|     |          |                 |                         |           |             |       |   |
|-----|----------|-----------------|-------------------------|-----------|-------------|-------|---|
| 918 | HK1      | ENST00000448642 | p.T188M                 | c.563     | 0.18861962  | 0     | 1 |
| 919 | HSPA9    | ENST00000297185 | p.I286T                 | c.857     | 0.022483337 | 5.475 | 1 |
| 919 | HSPA9    | ENST00000297185 | p.A311G                 | c.932     | 0.022483337 | 0     | 1 |
| 920 | POLI     | ENST00000579534 | p.V58E                  | c.173     | 0.049625831 | 0     | 1 |
| 920 | POLI     | ENST00000579534 | p.R209W                 | c.625     | 0.028281452 | 5.144 | 1 |
| 920 | POLI     | ENST00000579534 | p.S235C                 | c.704     | 0.021344379 | 5.55  | 1 |
| 921 | PKLR     | ENST00000342741 | p.E375K                 | c.1123    | 0.02002764  | 8.604 | 1 |
| 921 | PKLR     | ENST00000342741 | p.C467W                 | c.1401    | 0.024537571 | 5.547 | 1 |
| 921 | PKLR     | ENST00000342741 | p.L61M                  | c.181     | 0.171174187 | 0     | 1 |
| 921 | PKLR     | ENST00000342741 | p.A85V                  | c.254     | 0.167821721 | 2.764 | 1 |
| 922 | SCN2A    | ENST00000283256 | p.D1850N                | c.5548    | 0.039957566 | 7.855 | 1 |
| 922 | SCN2A    | ENST00000283256 | p.R1902C                | c.5704    | 1.00431926  | 0     | 1 |
| 922 | SCN2A    | ENST00000283256 | p.R1902H                | c.5705    | 1.00431926  | 0     | 1 |
| 923 | HBA2     | ENST00000251595 | p.L35M                  | c.103     | 0.025121071 | 7.781 | 1 |
| 923 | HBA1     | ENST00000320868 | p.T9N                   | c.26      | 0.253362624 | 0     | 1 |
| 923 | HBA2     | ENST00000251595 | p.A121V                 | c.362     | 0.247707209 | 2.178 | 1 |
| 923 | HBA2     | ENST00000251595 | p.H123Y                 | c.367     | 0.033984997 | 5.167 | 1 |
| 924 | ALOX15   | ENST00000545513 | p.I435M                 | c.1305    | 0.044071145 | 4.705 | 1 |
| 924 | ALOX15   | ENST00000545513 | p.F436S                 | c.1307    | 0.157771377 | 2.742 | 1 |
| 924 | ALOX15   | ENST00000545513 | p.G444V                 | c.1331    | 0.019708724 | 5.866 | 1 |
| 924 | ALOX15   | ENST00000545513 | p.A308T                 | c.922     | 0.204963442 | 0     | 1 |
| 925 | CR1      | ENST00000367052 | p.G1622E                | c.4865    | 0.017835988 | 9.385 | 1 |
| 925 | CR1      | ENST00000367052 | p.R1648W                | c.4942    | 0.249472786 | 0     | 1 |
| 925 | CR1      | ENST00000367052 | p.F1669S                | c.5006    | 0.054024364 | 4.879 | 1 |
| 925 | CR1      | ENST00000367052 | p.S1670L                | c.5009    | 0.179391042 | 2.705 | 1 |
| 925 | CR1      | ENST00000367052 | p.C1693S                | c.5077    | 0.059209608 | 4.551 | 1 |
| 925 | CR1      | ENST00000367052 | p.T1694M                | c.5081    | 0.020729709 | 5.798 | 1 |
| 926 | CDH1     | ENST00000261769 | p.ENEKGP165in_frame_del | c.488_505 | 0.324553195 | 3.01  | 1 |
| 926 | CDH1     | ENST00000261769 | p.R222G                 | c.664     | 0.518085003 | 2.485 | 1 |
| 926 | CDH1     | ENST00000261769 | p.D254Y                 | c.760     | 0.519039217 | 0     | 1 |
| 926 | CDH1     | ENST00000261769 | p.D290G                 | c.869     | 0.237021993 | 3.44  | 1 |
| 926 | CDH1     | ENST00000261769 | p.D291N                 | c.871     | 0.244089459 | 3.01  | 1 |
| 927 | SERPINA1 | ENST00000448921 | p.G344R                 | c.1030    | 0.300409012 | 2.735 | 1 |
| 927 | SERPINA1 | ENST00000448921 | p.G91R                  | c.271     | 1.150204506 | 0     | 1 |
| 927 | SERPINA1 | ENST00000448921 | p.G91V                  | c.272     | 1.150204506 | 0     | 1 |
| 928 | MGAM     | ENST00000475668 | p.D1337N                | c.4009    | 0.026110568 | 5.989 | 1 |
| 928 | MGAM     | ENST00000475668 | p.R1387C                | c.4159    | 0.050159533 | 0     | 1 |
| 928 | MGAM     | ENST00000475668 | p.P1471S                | c.4411    | 0.047444552 | 5.317 | 1 |
| 928 | MGAM     | ENST00000475668 | p.P1492T                | c.4474    | 0.0093294   | 6.744 | 1 |
| 929 | ACADSB   | ENST00000358776 | p.T350A                 | c.1048    | 0.011150425 | 6.632 | 1 |
| 929 | ACADSB   | ENST00000358776 | p.F363L                 | c.1087    | 0.005908469 | 7.403 | 1 |
| 929 | ACADSB   | ENST00000358776 | p.Q420E                 | c.1258    | 0.10698446  | 3.239 | 1 |
| 929 | ACADSB   | ENST00000358776 | p.R294T                 | c.881     | 0.121907543 | 0     | 1 |
| 930 | PTPRF    | ENST00000359947 | p.S344L                 | c.1031    | 0.070316155 | 0     | 1 |
| 930 | PTPRF    | ENST00000359947 | p.G378S                 | c.1132    | 0.070316155 | 3.83  | 1 |
| 931 | ITK      | ENST00000422843 | p.E172D                 | c.516     | 0.173155309 | 0     | 1 |
| 931 | ITK      | ENST00000422843 | p.D202A                 | c.605     | 0.105569465 | 3.348 | 1 |
| 931 | ITK      | ENST00000422843 | p.S203N                 | c.608     | 0.082306645 | 3.738 | 1 |
| 932 | CTLA4    | ENST00000302823 | p.A66D                  | c.197     | 0.261540607 | 3.494 | 1 |

|     |          |                 |         |        |             |       |   |
|-----|----------|-----------------|---------|--------|-------------|-------|---|
| 932 | CTLA4    | ENST00000302823 | p.A87T  | c.259  | 0.09894314  | 7.067 | 1 |
| 932 | CTLA4    | ENST00000302823 | p.M91T  | c.272  | 1.096214687 | 0     | 1 |
| 932 | CTLA4    | ENST00000302823 | p.M91I  | c.273  | 1.096214687 | 0     | 1 |
| 933 | F2       | ENST00000311907 | p.R217Q | c.650  | 0.284070257 | 0     | 1 |
| 933 | F2       | ENST00000311907 | p.D268N | c.802  | 0.083744514 | 3.859 | 1 |
| 933 | F2       | ENST00000311907 | p.E270K | c.808  | 0.141688769 | 3.036 | 1 |
| 933 | F2       | ENST00000311907 | p.Y290C | c.869  | 0.111026429 | 3.423 | 1 |
| 934 | P2RY4    | ENST00000374519 | p.R63H  | c.188  | 0.087595466 | 3.513 | 1 |
| 934 | P2RY4    | ENST00000374519 | p.Q316E | c.946  | 0.087595466 | 0     | 1 |
| 935 | MTPN     | ENST00000393085 | p.F6L   | c.18   | 0.030500993 | 5.035 | 1 |
| 935 | MTPN     | ENST00000393085 | p.A63D  | c.188  | 0.00341003  | 8.196 | 1 |
| 935 | MTPN     | ENST00000393085 | p.R30Q  | c.89   | 0.033911022 | 0     | 1 |
| 936 | STARD13  | ENST00000336934 | p.S42R  | c.124  | 1.00411184  | 0     | 1 |
| 936 | STARD13  | ENST00000336934 | p.S42T  | c.125  | 1.00411184  | 0     | 1 |
| 936 | STARD13  | ENST00000336934 | p.R68H  | c.203  | 0.016250255 | 7.926 | 1 |
| 937 | MPO      | ENST00000340482 | p.S372T | c.1115 | 0.011414409 | 6.453 | 1 |
| 937 | MPO      | ENST00000340482 | p.R479W | c.1435 | 0.011414409 | 0     | 1 |
| 938 | TLR10    | ENST00000508334 | p.R630I | c.1889 | 0.076309157 | 0     | 1 |
| 938 | TLR10    | ENST00000508334 | p.E687K | c.2059 | 0.076309157 | 3.712 | 1 |
| 939 | HUS1     | ENST00000436444 | p.F64L  | c.192  | 0.025880333 | 5.272 | 1 |
| 939 | HUS1     | ENST00000436444 | p.T114S | c.340  | 0.007380836 | 7.082 | 1 |
| 939 | HUS1     | ENST00000436444 | p.F3C   | c.8    | 0.033261169 | 0     | 1 |
| 940 | DCC      | ENST00000442544 | p.R443Q | c.1328 | 1.238149805 | 7.519 | 2 |
| 940 | DCC      | ENST00000442544 | p.R446H | c.1337 | 2.122627136 | 0     | 3 |
| 940 | DCC      | ENST00000442544 | p.V489L | c.1465 | 0.441049559 | 3.162 | 1 |
| 941 | C8B      | ENST00000371237 | p.Y344C | c.1031 | 0.215023927 | 0     | 1 |
| 941 | C8B      | ENST00000371237 | p.T346K | c.1037 | 0.098835806 | 6.709 | 1 |
| 941 | C8B      | ENST00000371237 | p.E468D | c.1404 | 0.211539777 | 2.983 | 1 |
| 941 | C8B      | ENST00000371237 | p.E472K | c.1414 | 0.090579777 | 3.737 | 1 |
| 941 | C8B      | ENST00000371237 | p.P189L | c.566  | 0.014934998 | 7.971 | 1 |
| 942 | ZMPSTE24 | ENST00000372759 | p.F445I | c.1333 | 0.025312197 | 0     | 1 |
| 942 | ZMPSTE24 | ENST00000372759 | p.H50Y  | c.148  | 0.014845934 | 6.515 | 1 |
| 942 | ZMPSTE24 | ENST00000372759 | p.L69F  | c.205  | 0.014377932 | 6.12  | 1 |
| 943 | PGC      | ENST00000373025 | p.E64K  | c.190  | 0.136310601 | 2.955 | 1 |
| 943 | PGC      | ENST00000373025 | p.A108T | c.322  | 0.142474921 | 4.133 | 1 |
| 943 | PGC      | ENST00000373025 | p.T169A | c.505  | 0.190409241 | 0     | 1 |
| 943 | PGC      | ENST00000373025 | p.V172I | c.514  | 0.082581915 | 7.811 | 1 |
| 944 | DAO      | ENST00000228476 | p.A36T  | c.106  | 0.01147788  | 6.445 | 1 |
| 944 | DAO      | ENST00000228476 | p.F159L | c.477  | 0.01147788  | 0     | 1 |
| 945 | GOT1     | ENST00000370508 | p.S85A  | c.253  | 0.021573669 | 6.066 | 1 |
| 945 | GOT1     | ENST00000370508 | p.R86H  | c.257  | 0.01505347  | 7.905 | 1 |
| 945 | GOT1     | ENST00000370508 | p.Q227E | c.679  | 0.033349881 | 5.982 | 1 |
| 945 | GOT1     | ENST00000370508 | p.F257L | c.771  | 0.034919595 | 0     | 1 |
| 946 | ROCK2    | ENST00000315872 | p.R336K | c.1007 | 0.011816937 | 6.403 | 1 |
| 946 | ROCK2    | ENST00000315872 | p.P259H | c.776  | 0.011816937 | 0     | 1 |
| 947 | ATG5     | ENST00000343245 | p.S66N  | c.197  | 0.17339864  | 0     | 1 |
| 947 | ATG5     | ENST00000343245 | p.K105N | c.315  | 0.142392954 | 2.863 | 1 |
| 947 | ATG5     | ENST00000343245 | p.S106I | c.317  | 0.040887557 | 4.798 | 1 |
| 948 | PTCRA    | ENST00000304672 | p.C47F  | c.140  | 0.09501806  | 3.417 | 1 |

|     |         |                 |          |           |             |       |   |
|-----|---------|-----------------|----------|-----------|-------------|-------|---|
| 948 | PTCRA   | ENST00000304672 | p.L50F   | c.148     | 0.039785447 | 7.733 | 1 |
| 948 | PTCRA   | ENST00000304672 | p.V52D   | c.155     | 0.010758052 | 7.271 | 1 |
| 948 | PTCRA   | ENST00000304672 | p.L89V   | c.265     | 0.106000654 | 0     | 1 |
| 948 | PTCRA   | ENST00000304672 | p.P27S   | c.79      | 0.04057165  | 9.699 | 1 |
| 949 | ACE     | ENST00000290866 | p.R918K  | c.2753    | 0.049248584 | 4.482 | 1 |
| 949 | ACE     | ENST00000290866 | p.S944L  | c.2831    | 0.14530007  | 0     | 1 |
| 949 | ACE     | ENST00000290866 | p.R971W  | c.2911    | 0.105050607 | 3.314 | 1 |
| 950 | MPO     | ENST00000340482 | p.A617D  | c.1850    | 0.036588312 | 6.974 | 1 |
| 950 | MPO     | ENST00000340482 | p.G630E  | c.1889    | 0.195467411 | 3.355 | 1 |
| 950 | MPO     | ENST00000340482 | p.D673N  | c.2017    | 1.105688277 | 0     | 2 |
| 951 | FLT3LG  | ENST00000600429 | p.S151F  | c.452_453 | 0.003723822 | 0     | 1 |
| 951 | FLT3LG  | ENST00000600429 | p.F32L   | c.96      | 0.003723822 | 8.069 | 1 |
| 952 | NT5C3A  | ENST00000396152 | p.L153H  | c.458     | 0.035255692 | 0     | 1 |
| 952 | NT5C3A  | ENST00000396152 | p.L297I  | c.889     | 0.035255692 | 4.826 | 1 |
| 953 | MTR     | ENST00000366577 | p.R1027Q | c.3080    | 0.157235621 | 2.669 | 1 |
| 953 | MTR     | ENST00000366577 | p.F1105L | c.3313    | 0.157235621 | 0     | 1 |
| 954 | PPP5C   | ENST0000012443  | p.R400Q  | c.1199    | 0.109120949 | 0     | 1 |
| 954 | PPP5C   | ENST0000012443  | p.E428K  | c.1282    | 0.109120949 | 3.196 | 1 |
| 955 | ITGAL   | ENST00000356798 | p.R281C  | c.841     | 0.074212422 | 5.941 | 1 |
| 955 | ITGAL   | ENST00000356798 | p.A307T  | c.919     | 1.016277241 | 0     | 2 |
| 956 | PTPRG   | ENST00000474889 | p.R94C   | c.280     | 2.126555129 | 0     | 2 |
| 956 | PTPRG   | ENST00000474889 | p.R94G   | c.280     | 2.126555129 | 0     | 1 |
| 956 | PTPRG   | ENST00000474889 | p.E97K   | c.289     | 0.027850821 | 8.913 | 1 |
| 956 | PTPRG   | ENST00000474889 | p.R251W  | c.751     | 0.187444798 | 6.039 | 1 |
| 956 | PTPRG   | ENST00000474889 | p.S318F  | c.953     | 0.485979635 | 3.194 | 1 |
| 957 | MTMR2   | ENST00000352297 | p.R292L  | c.875     | 0.013221228 | 0     | 1 |
| 957 | MTMR2   | ENST00000352297 | p.T314A  | c.940     | 0.013221228 | 6.241 | 1 |
| 958 | AGXT    | ENST00000307503 | p.P34F   | c.100_101 | 0.027719521 | 5.819 | 1 |
| 958 | AGXT    | ENST00000307503 | p.Q208H  | c.624     | 0.100538247 | 8.41  | 1 |
| 958 | AGXT    | ENST00000307503 | p.A213V  | c.638     | 0.17624443  | 0     | 1 |
| 958 | AGXT    | ENST00000307503 | p.S271N  | c.812     | 0.053547176 | 4.37  | 1 |
| 958 | AGXT    | ENST00000307503 | p.S275R  | c.825     | 0.093164293 | 3.697 | 1 |
| 958 | AGXT    | ENST00000307503 | p.P30L   | c.89      | 0.131500569 | 5.053 | 1 |
| 959 | PRPSAP1 | ENST00000446526 | p.Y197H  | c.589     | 0.006176477 | 7.339 | 1 |
| 959 | PRPSAP1 | ENST00000446526 | p.I202T  | c.605     | 0.011011249 | 7.644 | 1 |
| 959 | PRPSAP1 | ENST00000446526 | p.R279H  | c.836     | 0.011175979 | 0     | 1 |
| 960 | ICAM2   | ENST00000579687 | p.A37V   | c.110     | 0.111262099 | 0     | 1 |
| 960 | ICAM2   | ENST00000579687 | p.P40L   | c.119     | 0.081924873 | 8.822 | 1 |
| 960 | ICAM2   | ENST00000579687 | p.V108M  | c.322     | 0.109688373 | 5.173 | 1 |
| 960 | ICAM2   | ENST00000579687 | p.G200D  | c.599     | 0.08358833  | 3.62  | 1 |
| 961 | PDK3    | ENST00000441463 | p.V193M  | c.577     | 0.11335436  | 0     | 1 |
| 961 | PDK3    | ENST00000441463 | p.E222D  | c.666     | 0.035565314 | 4.925 | 1 |
| 961 | PDK3    | ENST00000441463 | p.V234L  | c.700     | 0.08308461  | 3.636 | 1 |
| 962 | C6      | ENST00000263413 | p.T674N  | c.2021    | 0.021814091 | 5.722 | 1 |
| 962 | C6      | ENST00000263413 | p.T702M  | c.2105    | 0.17035753  | 0     | 1 |
| 962 | C6      | ENST00000263413 | p.R723K  | c.2168    | 0.091866743 | 3.563 | 1 |
| 962 | C6      | ENST00000263413 | p.G748R  | c.2242    | 0.073718031 | 3.904 | 1 |
| 963 | MAT1A   | ENST00000372213 | p.L364V  | c.1090    | 0.069204037 | 3.853 | 1 |
| 963 | MAT1A   | ENST00000372213 | p.W387S  | c.1160    | 0.069204037 | 0     | 1 |

|              |                 |          |        |             |       |     |
|--------------|-----------------|----------|--------|-------------|-------|-----|
| 964 RECQL    | ENST00000421138 | p.G403E  | c.1208 | 0.056430563 | 7.242 | 1   |
| 964 RECQL    | ENST00000421138 | p.R455L  | c.1364 | 0.217864325 | 0     | 1   |
| 964 RECQL    | ENST00000421138 | p.P284S  | c.850  | 0.098978194 | 3.668 | 1   |
| 964 RECQL    | ENST00000421138 | p.L286Q  | c.857  | 0.192841344 | 2.915 | 1   |
| 965 DIRAS1   | ENST00000323469 | p.P69L   | c.206  | 0.084139332 | 4.025 | 1   |
| 965 DIRAS1   | ENST00000323469 | p.V119M  | c.355  | 0.008525499 | 6.874 | 1   |
| 965 DIRAS1   | ENST00000323469 | p.E125K  | c.373  | 0.034655142 | 6.254 | 1   |
| 965 DIRAS1   | ENST00000323469 | p.S150L  | c.449  | 0.101947472 | 0     | 1   |
| 965 DIRAS1   | ENST00000323469 | p.R26H   | c.77   | 0.029015361 | 5.726 | 1   |
| 966 LYZ      | ENST00000261267 | p.E53K   | c.157  | 0.041839159 | 0     | 1   |
| 966 LYZ      | ENST00000261267 | p.R119C  | c.355  | 0.035504414 | 5.482 | 1   |
| 966 LYZ      | ENST00000261267 | p.R133H  | c.398  | 0.019464647 | 5.683 | 1   |
| 967 AIFM1    | ENST00000287295 | p.I137M  | c.411  | 0.144485838 | 0     | 1   |
| 967 AIFM1    | ENST00000287295 | p.A259E  | c.776  | 0.144485838 | 2.791 | 1   |
| 968 PIK3CA   | ENST00000263967 | p.Q958R  | c.2873 | 9.01433212  | 4.324 | 1   |
| 968 PIK3CA   | ENST00000263967 | p.H1047Y | c.3139 | 168.0786511 | 0     | 1   |
| 968 PIK3CA   | ENST00000263967 | p.H1047L | c.3140 | 168.0786511 | 0     | 21  |
| 968 PIK3CA   | ENST00000263967 | p.H1047R | c.3140 | 168.0786511 | 0     | 146 |
| 968 PIK3CA   | ENST00000263967 | p.H1047Q | c.3141 | 168.0786511 | 0     | 1   |
| 968 PIK3CA   | ENST00000263967 | p.H1048R | c.3143 | 1.094458955 | 7.516 | 1   |
| 968 PIK3CA   | ENST00000263967 | p.G1049R | c.3145 | 3.482561942 | 7.011 | 3   |
| 969 PROC     | ENST00000453608 | p.V414I  | c.1240 | 0.192242604 | 0     | 1   |
| 969 PROC     | ENST00000453608 | p.R327C  | c.979  | 0.192242604 | 2.379 | 1   |
| 970 TGFBR1   | ENST00000552516 | p.A206V  | c.617  | 0.157126672 | 2.67  | 1   |
| 970 TGFBR1   | ENST00000552516 | p.E232V  | c.695  | 0.157126672 | 0     | 1   |
| 971 PVRL1    | ENST00000264025 | p.S174L  | c.521  | 0.114387396 | 3.128 | 1   |
| 971 PVRL1    | ENST00000264025 | p.T206M  | c.617  | 0.114387396 | 0     | 1   |
| 972 OTUD3    | ENST00000375120 | p.D109Y  | c.325  | 0.071843428 | 0     | 1   |
| 972 OTUD3    | ENST00000375120 | p.R144I  | c.431  | 0.071843428 | 3.799 | 1   |
| 973 ERP27    | ENST00000266397 | p.L164I  | c.490  | 0.007006939 | 7.157 | 1   |
| 973 ERP27    | ENST00000266397 | p.Q246R  | c.737  | 0.007006939 | 0     | 1   |
| 974 SKIL     | ENST00000458537 | p.E162D  | c.486  | 0.001440714 | 9.439 | 1   |
| 974 SKIL     | ENST00000458537 | p.R237Q  | c.710  | 0.001440714 | 0     | 1   |
| 975 CBLC     | ENST00000270279 | p.R119Q  | c.356  | 0.114704985 | 3.124 | 1   |
| 975 CBLC     | ENST00000270279 | p.E186K  | c.556  | 0.114704985 | 0     | 1   |
| 976 LDHA     | ENST00000540430 | p.G216W  | c.646  | 0.017027377 | 0     | 1   |
| 976 LDHA     | ENST00000540430 | p.P321S  | c.961  | 0.017027377 | 5.876 | 1   |
| 977 ZMPSTE24 | ENST00000372759 | p.S352G  | c.1054 | 0.009213723 | 0     | 1   |
| 977 ZMPSTE24 | ENST00000372759 | p.L403I  | c.1207 | 0.009213723 | 6.762 | 1   |
| 978 PNLIPRP1 | ENST00000358834 | p.F96I   | c.286  | 0.096521892 | 0     | 1   |
| 978 PNLIPRP1 | ENST00000358834 | p.W270L  | c.809  | 0.096521892 | 3.373 | 1   |
| 979 CHEK2    | ENST00000382580 | p.E351Q  | c.1051 | 0.19638422  | 0     | 1   |
| 979 CHEK2    | ENST00000382580 | p.E394D  | c.1182 | 0.127024947 | 3.086 | 1   |
| 979 CHEK2    | ENST00000382580 | p.L397V  | c.1189 | 0.096838122 | 3.669 | 1   |
| 983 MMP14    | ENST00000311852 | p.W421R  | c.1261 | 0.03526366  | 4.94  | 1   |
| 983 MMP14    | ENST00000311852 | p.E457K  | c.1369 | 0.08515585  | 3.6   | 1   |
| 983 MMP14    | ENST00000311852 | p.F486S  | c.1457 | 0.115046299 | 0     | 1   |
| 984 CTSG     | ENST00000216336 | p.Y37H   | c.109  | 0.093752437 | 0     | 1   |
| 984 CTSG     | ENST00000216336 | p.I70M   | c.210  | 0.093752437 | 3.415 | 1   |

|            |                 |          |        |             |       |   |
|------------|-----------------|----------|--------|-------------|-------|---|
| 985 ANGPT1 | ENST00000517746 | p.G453S  | c.1357 | 0.089035319 | 3.688 | 1 |
| 985 ANGPT1 | ENST00000517746 | p.P454S  | c.1360 | 0.158967893 | 2.761 | 1 |
| 985 ANGPT1 | ENST00000517746 | p.H477Y  | c.1429 | 0.225111011 | 0     | 1 |
| 986 RNF41  | ENST0000052656  | p.R213H  | c.638  | 0.013377942 | 6.224 | 1 |
| 986 RNF41  | ENST0000052656  | p.A311V  | c.932  | 0.013377942 | 0     | 1 |
| 987 PDE1C  | ENST00000396193 | p.G334R  | c.1000 | 0.109777641 | 0     | 1 |
| 987 PDE1C  | ENST00000396193 | p.R464K  | c.1391 | 0.086136092 | 3.574 | 1 |
| 987 PDE1C  | ENST00000396193 | p.H288Y  | c.862  | 0.027975805 | 5.276 | 1 |
| 988 ALDOB  | ENST00000374855 | p.R4Q    | c.11   | 1.010893573 | 0     | 2 |
| 988 ALDOB  | ENST00000374855 | p.P115S  | c.343  | 0.199144074 | 6.661 | 1 |
| 988 ALDOB  | ENST00000374855 | p.A172T  | c.514  | 0.123990727 | 9.949 | 1 |
| 989 ADSS   | ENST00000366535 | p.T370M  | c.1109 | 0.039297778 | 4.715 | 1 |
| 989 ADSS   | ENST00000366535 | p.K373I  | c.1118 | 0.033328752 | 4.961 | 1 |
| 989 ADSS   | ENST00000366535 | p.L405I  | c.1213 | 0.070181616 | 0     | 1 |
| 991 KLK4   | ENST00000598305 | p.P16H   | c.47   | 0.015997608 | 0     | 1 |
| 992 MECR   | ENST00000263702 | p.M373L  | c.1117 | 0.139455725 | 2.896 | 1 |
| 992 MECR   | ENST00000263702 | p.R74S   | c.220  | 0.10606063  | 8.89  | 1 |
| 992 MECR   | ENST00000263702 | p.M77I   | c.231  | 0.174503764 | 0     | 1 |
| 992 MECR   | ENST00000263702 | p.P130L  | c.389  | 0.020163051 | 5.814 | 1 |
| 992 MECR   | ENST00000263702 | p.A142V  | c.425  | 0.126954039 | 5.624 | 1 |
| 993 CDA    | ENST00000375071 | p.A88T   | c.262  | 0.079164641 | 0     | 1 |
| 993 CDA    | ENST00000375071 | p.T118I  | c.353  | 0.079164641 | 3.659 | 1 |
| 994 ESR1   | ENST00000440973 | p.L354M  | c.1060 | 0.326943671 | 3.353 | 1 |
| 994 ESR1   | ENST00000440973 | p.H373N  | c.1117 | 0.664359432 | 2.529 | 1 |
| 994 ESR1   | ENST00000440973 | p.Y537N  | c.1609 | 2.293240431 | 0     | 1 |
| 994 ESR1   | ENST00000440973 | p.Y537C  | c.1610 | 2.293240431 | 0     | 1 |
| 994 ESR1   | ENST00000440973 | p.Y537S  | c.1610 | 2.293240431 | 0     | 1 |
| 994 ESR1   | ENST00000440973 | p.D538G  | c.1613 | 0.210342843 | 5.499 | 1 |
| 996 RAC1   | ENST00000356142 | p.N39S   | c.116  | 0.013859317 | 0     | 1 |
| 996 RAC1   | ENST00000356142 | p.S71F   | c.212  | 0.013859317 | 6.173 | 1 |
| 997 ITGB3  | ENST00000559488 | p.R386C  | c.1156 | 0.20928367  | 0     | 1 |
| 997 ITGB3  | ENST00000559488 | p.S439F  | c.1316 | 0.04907399  | 4.572 | 1 |
| 997 ITGB3  | ENST00000559488 | p.S326F  | c.977  | 0.174272209 | 2.58  | 1 |
| 998 GRM5   | ENST00000305447 | p.P353T  | c.1057 | 0.006112592 | 7.354 | 1 |
| 998 GRM5   | ENST00000305447 | p.V43A   | c.128  | 0.170444639 | 0     | 1 |
| 998 GRM5   | ENST00000305447 | p.H45Q   | c.135  | 0.023957298 | 9.265 | 1 |
| 998 GRM5   | ENST00000305447 | p.G58R   | c.172  | 0.011178157 | 9.67  | 1 |
| 998 GRM5   | ENST00000305447 | p.R68I   | c.203  | 0.012917844 | 7.342 | 1 |
| 998 GRM5   | ENST00000305447 | p.D97N   | c.289  | 0.150432268 | 3.019 | 1 |
| 998 GRM5   | ENST00000305447 | p.S98Y   | c.293  | 0.05342796  | 4.968 | 1 |
| 999 SYN3   | ENST00000358763 | p.P159Q  | c.476  | 0.013048249 | 6.26  | 1 |
| 999 SYN3   | ENST00000358763 | p.P190A  | c.568  | 0.013048249 | 0     | 1 |
| 1000 MGAM  | ENST00000475668 | p.R1250C | c.3748 | 1.217105526 | 0     | 1 |
| 1000 MGAM  | ENST00000475668 | p.R1250L | c.3749 | 1.217105526 | 0     | 1 |
| 1000 MGAM  | ENST00000475668 | p.Q1254H | c.3762 | 0.055049587 | 9.264 | 1 |
| 1000 MGAM  | ENST00000475668 | p.D1281N | c.3841 | 1.157150515 | 3.993 | 2 |
| 1000 MGAM  | ENST00000475668 | p.R2487K | c.7460 | 0.191030585 | 3.476 | 1 |
| 1001 ACACB | ENST00000338432 | p.M2152T | c.6455 | 0.010569127 | 6.564 | 1 |
| 1001 ACACB | ENST00000338432 | p.Y2327H | c.6979 | 0.010569127 | 0     | 1 |

|             |                 |          |             |             |       |   |
|-------------|-----------------|----------|-------------|-------------|-------|---|
| 1002 CCR5   | ENST00000292303 | p.S185I  | c.554       | 1.022528159 | 0     | 2 |
| 1002 CCR5   | ENST00000292303 | p.Q186K  | c.556       | 0.206753621 | 8.073 | 1 |
| 1002 CCR5   | ENST00000292303 | p.N258K  | c.774       | 0.244898345 | 5.732 | 1 |
| 1004 FHIT   | ENST00000476844 | p.R46H   | c.137       | 0.091378591 | 3.452 | 1 |
| 1004 FHIT   | ENST00000476844 | p.V95L   | c.283       | 0.091378591 | 0     | 1 |
| 1005 TAB1   | ENST00000216160 | p.A81S   | c.241       | 0.009881871 | 6.661 | 1 |
| 1005 TAB1   | ENST00000216160 | p.Q82E   | c.244       | 0.064929447 | 3.967 | 1 |
| 1005 TAB1   | ENST00000216160 | p.R83W   | c.247       | 0.01636123  | 6.023 | 1 |
| 1005 TAB1   | ENST00000216160 | p.W17C   | c.51        | 0.089205839 | 0     | 1 |
| 1006 ACAD8  | ENST00000281182 | p.R79W   | c.235       | 0.139310472 | 7.33  | 1 |
| 1006 ACAD8  | ENST00000281182 | p.P148S  | c.442       | 1.006215129 | 0     | 1 |
| 1006 ACAD8  | ENST00000281182 | p.P148L  | c.443       | 1.006215129 | 0     | 1 |
| 1007 ITGA2B | ENST00000262407 | p.N670D  | c.2008      | 0.487677731 | 2.036 | 1 |
| 1007 ITGA2B | ENST00000262407 | p.A728V  | c.2183      | 1.243838865 | 0     | 1 |
| 1007 ITGA2B | ENST00000262407 | p.A728Y  | c.2183_2182 | 1.243838865 | 0     | 1 |
| 1008 CDK8   | ENST00000381527 | p.R65K   | c.194       | 0.108367195 | 3.206 | 1 |
| 1008 CDK8   | ENST00000381527 | p.R150T  | c.449       | 0.108367195 | 0     | 1 |
| 1009 TGFBR2 | ENST00000359013 | p.C102R  | c.304       | 0.128503217 | 6.682 | 1 |
| 1009 TGFBR2 | ENST00000359013 | p.D128N  | c.382       | 1.009739072 | 0     | 1 |
| 1009 TGFBR2 | ENST00000359013 | p.D128G  | c.383       | 1.009739072 | 0     | 1 |
| 1010 GPCPD1 | ENST00000379019 | p.R67H   | c.200       | 1.281742281 | 0     | 2 |
| 1010 GPCPD1 | ENST00000379019 | p.V87F   | c.259       | 0.008962079 | 9.946 | 1 |
| 1010 GPCPD1 | ENST00000379019 | p.H93Y   | c.277       | 0.288728112 | 2.894 | 1 |
| 1010 GPCPD1 | ENST00000379019 | p.C23R   | c.67        | 0.31899946  | 2.774 | 1 |
| 1011 OGT    | ENST00000373719 | p.T819I  | c.2456      | 0.256559156 | 3.65  | 1 |
| 1011 OGT    | ENST00000373719 | p.V843I  | c.2527      | 2.101775396 | 0     | 2 |
| 1011 OGT    | ENST00000373719 | p.V843L  | c.2527      | 2.101775396 | 0     | 1 |
| 1011 OGT    | ENST00000373719 | p.G915C  | c.2743      | 0.059185488 | 6.48  | 1 |
| 1011 OGT    | ENST00000373719 | p.R994C  | c.2980      | 0.110254257 | 6.716 | 1 |
| 1011 OGT    | ENST00000373719 | p.H326Y  | c.976       | 0.02178008  | 9.48  | 1 |
| 1012 F5     | ENST00000367796 | p.S83L   | c.248       | 0.020234268 | 8.248 | 1 |
| 1012 F5     | ENST00000367796 | p.H270Y  | c.808       | 0.283855941 | 0     | 1 |
| 1012 F5     | ENST00000367796 | p.I308M  | c.924       | 0.227843498 | 2.365 | 1 |
| 1012 F5     | ENST00000367796 | p.S310C  | c.929       | 0.103230734 | 3.532 | 1 |
| 1013 PTPRG  | ENST00000474889 | p.A885V  | c.2654      | 0.065835065 | 3.925 | 1 |
| 1013 PTPRG  | ENST00000474889 | p.R1099H | c.3296      | 0.065835065 | 0     | 1 |
| 1014 ATL1   | ENST00000441560 | p.K138R  | c.413       | 0.006992383 | 7.16  | 1 |
| 1014 ATL1   | ENST00000441560 | p.G232R  | c.694       | 0.006992383 | 0     | 1 |
| 1015 IMPDH2 | ENST00000326739 | p.S388C  | c.1163      | 0.014298425 | 6.128 | 1 |
| 1015 IMPDH2 | ENST00000326739 | p.S416Y  | c.1247      | 0.012352955 | 6.339 | 1 |
| 1015 IMPDH2 | ENST00000326739 | p.I330T  | c.989       | 0.026651379 | 0     | 1 |
| 1016 DDC    | ENST00000444124 | p.T69M   | c.206       | 1.088510965 | 0     | 2 |
| 1016 DDC    | ENST00000444124 | p.P31T   | c.91        | 0.17702193  | 3.498 | 1 |
| 1017 CTSS   | ENST00000368985 | p.S90F   | c.269       | 1.12174852  | 0     | 1 |
| 1017 CTSS   | ENST00000368985 | p.S90Y   | c.269       | 1.12174852  | 0     | 1 |
| 1017 CTSS   | ENST00000368985 | p.L91F   | c.273       | 0.050932404 | 9.461 | 1 |
| 1017 CTSS   | ENST00000368985 | p.S135Y  | c.404       | 0.402925357 | 4.519 | 1 |
| 1017 CTSS   | ENST00000368985 | p.G137V  | c.410       | 0.307220094 | 3.92  | 1 |
| 1017 CTSS   | ENST00000368985 | p.G176E  | c.527       | 0.391742687 | 6.553 | 1 |

|              |                 |         |        |             |       |   |
|--------------|-----------------|---------|--------|-------------|-------|---|
| 1018 KIT     | ENST00000288135 | p.N566S | c.1697 | 0.091747442 | 9.731 | 1 |
| 1018 KIT     | ENST00000288135 | p.V603D | c.1808 | 0.662711796 | 3.568 | 1 |
| 1018 KIT     | ENST00000288135 | p.G812V | c.2435 | 0.425726186 | 5.859 | 1 |
| 1018 KIT     | ENST00000288135 | p.D816Y | c.2446 | 4.102724845 | 0     | 1 |
| 1018 KIT     | ENST00000288135 | p.D816V | c.2447 | 4.102724845 | 0     | 4 |
| 1019 GRB2    | ENST00000316804 | p.I53R  | c.158  | 0.04118545  | 5.416 | 1 |
| 1019 GRB2    | ENST00000316804 | p.V154L | c.460  | 0.014230098 | 9.226 | 1 |
| 1019 GRB2    | ENST00000316804 | p.Q156R | c.467  | 0.158045879 | 0     | 1 |
| 1019 GRB2    | ENST00000316804 | p.R215Q | c.644  | 0.148628289 | 2.911 | 1 |
| 1020 CSF1R   | ENST00000286301 | p.A226V | c.677  | 0.015916149 | 6.069 | 1 |
| 1020 CSF1R   | ENST00000286301 | p.V229I | c.685  | 0.069556584 | 3.867 | 1 |
| 1020 CSF1R   | ENST00000286301 | p.R256C | c.766  | 0.083431014 | 0     | 1 |
| 1021 PDE5A   | ENST00000354960 | p.I371V | c.1111 | 0.042955897 | 0     | 1 |
| 1021 PDE5A   | ENST00000354960 | p.I503V | c.1507 | 0.042955897 | 4.541 | 1 |
| 1022 SLAMF6  | ENST00000368057 | p.Q143E | c.427  | 0.002165626 | 8.851 | 1 |
| 1022 SLAMF6  | ENST00000368057 | p.P185H | c.554  | 0.002165626 | 0     | 1 |
| 1023 ALDOB   | ENST00000374855 | p.S65F  | c.194  | 0.641997323 | 2.3   | 1 |
| 1023 ALDOB   | ENST00000374855 | p.I70T  | c.209  | 0.540483132 | 2.694 | 1 |
| 1023 ALDOB   | ENST00000374855 | p.E100K | c.298  | 2.364628772 | 0     | 3 |
| 1023 ALDOB   | ENST00000374855 | p.K101R | c.302  | 0.068021259 | 7.152 | 1 |
| 1024 ITGAL   | ENST00000356798 | p.D156N | c.466  | 0.21324622  | 0     | 1 |
| 1024 ITGAL   | ENST00000356798 | p.S190L | c.569  | 0.032711181 | 5.177 | 1 |
| 1024 ITGAL   | ENST00000356798 | p.F208L | c.624  | 0.200526197 | 2.447 | 1 |
| 1024 ITGAL   | ENST00000356798 | p.E248G | c.743  | 0.0142779   | 8.82  | 1 |
| 1025 CFTR    | ENST00000003084 | p.R487I | c.1460 | 0.312538556 | 9.25  | 1 |
| 1025 CFTR    | ENST00000003084 | p.S511F | c.1532 | 1.011851479 | 0     | 2 |
| 1025 CFTR    | ENST00000003084 | p.D565Y | c.1693 | 0.20516232  | 6.614 | 1 |
| 1026 CD1A    | ENST00000289429 | p.D58G  | c.173  | 0.00504126  | 0     | 1 |
| 1026 CD1A    | ENST00000289429 | p.E84K  | c.250  | 0.00504126  | 7.632 | 1 |
| 1027 CYP11B2 | ENST00000323110 | p.E457Q | c.1369 | 0.012006837 | 7.38  | 1 |
| 1027 CYP11B2 | ENST00000323110 | p.L158I | c.472  | 1.006003419 | 0     | 1 |
| 1027 CYP11B2 | ENST00000323110 | p.L158P | c.473  | 1.006003419 | 0     | 1 |
| 1028 MAN1B1  | ENST00000535144 | p.T361M | c.1082 | 0.078599106 | 5.216 | 1 |
| 1028 MAN1B1  | ENST00000535144 | p.R365Q | c.1094 | 0.078416565 | 3.711 | 1 |
| 1029 RAB7A   | ENST00000265062 | p.M51L  | c.151  | 0.016504463 | 5.921 | 1 |
| 1029 RAB7A   | ENST00000265062 | p.D54H  | c.160  | 0.006159376 | 7.343 | 1 |
| 1029 RAB7A   | ENST00000265062 | p.R171Q | c.512  | 0.022663839 | 0     | 1 |
| 1030 FGB     | ENST00000302068 | p.S237P | c.709  | 0.089953302 | 3.611 | 1 |
| 1030 FGB     | ENST00000302068 | p.E253D | c.759  | 0.10720848  | 3.335 | 1 |
| 1030 FGB     | ENST00000302068 | p.G317C | c.949  | 0.180940856 | 0     | 1 |
| 1031 STK4    | ENST00000372806 | p.R447T | c.1340 | 0.026998068 | 0     | 1 |
| 1031 STK4    | ENST00000372806 | p.R470W | c.1408 | 0.026998068 | 5.211 | 1 |
| 1032 MASP1   | ENST00000296280 | p.T215A | c.643  | 0.081798297 | 3.871 | 1 |
| 1032 MASP1   | ENST00000296280 | p.L226M | c.676  | 0.008728806 | 6.84  | 1 |
| 1032 MASP1   | ENST00000296280 | p.K254N | c.762  | 0.00755161  | 7.049 | 1 |
| 1032 MASP1   | ENST00000296280 | p.L276P | c.827  | 0.084626382 | 0     | 1 |
| 1033 FUT8    | ENST00000360689 | p.C204S | c.611  | 0.028066637 | 0     | 1 |
| 1033 FUT8    | ENST00000360689 | p.S270F | c.809  | 0.028066637 | 5.155 | 1 |
| 1035 HNF4A   | ENST00000316099 | p.A154V | c.461  | 0.033704622 | 9.877 | 1 |



|               |                 |         |        |             |       |   |
|---------------|-----------------|---------|--------|-------------|-------|---|
| 1035 HNF4A    | ENST00000316099 | p.A158V | c.473  | 0.14631894  | 6.991 | 1 |
| 1035 HNF4A    | ENST00000316099 | p.V199I | c.595  | 0.019262338 | 7.133 | 1 |
| 1035 HNF4A    | ENST00000316099 | p.W201R | c.601  | 0.399120771 | 3.596 | 1 |
| 1035 HNF4A    | ENST00000316099 | p.A287V | c.860  | 0.104609205 | 8.791 | 1 |
| 1035 HNF4A    | ENST00000316099 | p.K290T | c.869  | 0.135555113 | 6.997 | 1 |
| 1035 HNF4A    | ENST00000316099 | p.F294L | c.882  | 1.10883391  | 0     | 2 |
| 1036 ACO1     | ENST00000379923 | p.F355V | c.1063 | 0.027299153 | 6.195 | 1 |
| 1036 ACO1     | ENST00000379923 | p.S38L  | c.113  | 1.013649576 | 0     | 2 |
| 1037 REV1     | ENST00000258428 | p.P62S  | c.184  | 0.034081415 | 0     | 1 |
| 1037 REV1     | ENST00000258428 | p.R110Q | c.329  | 0.007872295 | 6.989 | 1 |
| 1037 REV1     | ENST00000258428 | p.E116D | c.348  | 0.012301687 | 6.345 | 1 |
| 1037 REV1     | ENST00000258428 | p.I118M | c.354  | 0.026458902 | 6.168 | 1 |
| 1038 DSP      | ENST00000379802 | p.N437S | c.1310 | 0.015596116 | 7.435 | 1 |
| 1038 DSP      | ENST00000379802 | p.S523C | c.1568 | 1.005778857 | 0     | 1 |
| 1038 DSP      | ENST00000379802 | p.S523F | c.1568 | 1.005778857 | 0     | 1 |
| 1039 TREM1    | ENST00000589614 | p.D38N  | c.112  | 0.280444792 | 3.374 | 1 |
| 1039 TREM1    | ENST00000589614 | p.V98F  | c.292  | 0.111520933 | 6.888 | 1 |
| 1039 TREM1    | ENST00000589614 | p.R128S | c.382  | 1.104898178 | 0     | 1 |
| 1039 TREM1    | ENST00000589614 | p.R128H | c.383  | 1.104898178 | 0     | 1 |
| 1040 USO1     | ENST00000538159 | p.V189I | c.565  | 1.066939426 | 0     | 1 |
| 1040 USO1     | ENST00000538159 | p.V189A | c.566  | 1.066939426 | 0     | 1 |
| 1040 USO1     | ENST00000538159 | p.C234S | c.700  | 0.133878853 | 3.901 | 1 |
| 1041 FDX1     | ENST00000260270 | p.S88F  | c.263  | 0.002002475 | 0     | 1 |
| 1041 FDX1     | ENST00000260270 | p.T109S | c.326  | 0.002002475 | 8.964 | 1 |
| 1042 ENPEP    | ENST00000265162 | p.P145Q | c.434  | 0.13763815  | 3.255 | 1 |
| 1042 ENPEP    | ENST00000265162 | p.E146D | c.438  | 0.156660984 | 2.818 | 1 |
| 1042 ENPEP    | ENST00000265162 | p.V169M | c.505  | 0.019924921 | 9.048 | 1 |
| 1042 ENPEP    | ENST00000265162 | p.T189A | c.565  | 0.248444539 | 0     | 1 |
| 1043 TGM3     | ENST00000381458 | p.R53I  | c.158  | 0.072192862 | 3.792 | 1 |
| 1043 TGM3     | ENST00000381458 | p.E653D | c.1959 | 0.072192862 | 0     | 1 |
| 1044 SERPINB5 | ENST00000382771 | p.I159S | c.476  | 0.092397652 | 3.436 | 1 |
| 1044 SERPINB5 | ENST00000382771 | p.M307L | c.919  | 0.092397652 | 0     | 1 |
| 1045 GSTK1    | ENST00000479303 | p.R101H | c.302  | 0.011469927 | 6.446 | 1 |
| 1045 GSTK1    | ENST00000479303 | p.T217M | c.650  | 0.011469927 | 0     | 1 |
| 1046 PLCG1    | ENST00000373272 | p.S705C | c.2114 | 0.039836374 | 6.281 | 1 |
| 1046 PLCG1    | ENST00000373272 | p.L752V | c.2254 | 1.012859693 | 0     | 1 |
| 1046 PLCG1    | ENST00000373272 | p.L752Q | c.2255 | 1.012859693 | 0     | 1 |
| 1047 PTBP2    | ENST00000394184 | p.E364Q | c.1090 | 0.048579667 | 7.148 | 1 |
| 1047 PTBP2    | ENST00000394184 | p.Q369R | c.1106 | 0.008379036 | 7.899 | 1 |
| 1047 PTBP2    | ENST00000394184 | p.A471T | c.1411 | 0.019210147 | 7.399 | 1 |
| 1047 PTBP2    | ENST00000394184 | p.Q523E | c.1567 | 1.017165178 | 0     | 1 |
| 1047 PTBP2    | ENST00000394184 | p.Q523P | c.1568 | 1.017165178 | 0     | 1 |
| 1048 PARK2    | ENST00000366898 | p.G160E | c.479  | 0.176331008 | 0     | 1 |
| 1048 PARK2    | ENST00000366898 | p.K211N | c.633  | 0.120574256 | 3.14  | 1 |
| 1048 PARK2    | ENST00000366898 | p.G213V | c.638  | 0.070025475 | 3.991 | 1 |
| 1049 CSNK2A1  | ENST00000349736 | p.P92T  | c.274  | 0.046135945 | 6.389 | 1 |
| 1049 CSNK2A1  | ENST00000349736 | p.W176L | c.527  | 1.027907614 | 0     | 1 |
| 1049 CSNK2A1  | ENST00000349736 | p.W176C | c.528  | 1.027907614 | 0     | 1 |
| 1049 CSNK2A1  | ENST00000349736 | p.D214Y | c.640  | 0.044786981 | 5.968 | 1 |

|            |                 |          |             |             |       |   |
|------------|-----------------|----------|-------------|-------------|-------|---|
| 1050 HDAC1 | ENST00000373548 | p.H167Y  | c.499       | 0.07209285  | 0     | 1 |
| 1050 HDAC1 | ENST00000373548 | p.A256V  | c.767       | 0.07209285  | 3.794 | 1 |
| 1051 IDE   | ENST00000265986 | p.D698A  | c.2093      | 0.19613398  | 2.381 | 1 |
| 1051 IDE   | ENST00000265986 | p.P760L  | c.2279      | 0.215075339 | 0     | 1 |
| 1051 IDE   | ENST00000265986 | p.Q914K  | c.2740_2739 | 0.068010976 | 9.438 | 1 |
| 1051 IDE   | ENST00000265986 | p.R1000C | c.2998      | 0.092384301 | 5.529 | 1 |
| 1052 CNDP1 | ENST00000358821 | p.R376H  | c.1127      | 0.017658557 | 7.391 | 1 |
| 1052 CNDP1 | ENST00000358821 | p.P417R  | c.1250      | 1.005957819 | 0     | 2 |
| 1053 STIM2 | ENST00000382009 | p.D186Y  | c.556       | 0.194251817 | 2.364 | 1 |
| 1053 STIM2 | ENST00000382009 | p.L286V  | c.856       | 0.194251817 | 0     | 1 |
| 1054 MARK1 | ENST00000366917 | p.N70Y   | c.208       | 0.048037156 | 0     | 1 |
| 1054 MARK1 | ENST00000366917 | p.N205D  | c.613       | 0.01721508  | 6.091 | 1 |
| 1054 MARK1 | ENST00000366917 | p.E206K  | c.616       | 0.033632987 | 5.036 | 1 |
| 1054 MARK1 | ENST00000366917 | p.N211K  | c.633       | 0.037134486 | 8.436 | 1 |
| 1055 ASB9  | ENST00000380488 | p.R143W  | c.427       | 0.139500986 | 0     | 1 |
| 1055 ASB9  | ENST00000380488 | p.P170T  | c.508       | 0.023576015 | 5.568 | 1 |
| 1055 ASB9  | ENST00000380488 | p.Q179R  | c.536       | 0.120917547 | 3.078 | 1 |
| 1056 CP    | ENST00000264613 | p.G170R  | c.508       | 0.008572906 | 6.866 | 1 |
| 1056 CP    | ENST00000264613 | p.D171N  | c.511       | 0.011784219 | 6.407 | 1 |
| 1056 CP    | ENST00000264613 | p.N306K  | c.918       | 0.020357125 | 0     | 1 |
| 1057 PTK2  | ENST00000519419 | p.I100V  | c.298       | 0.013396501 | 6.222 | 1 |
| 1057 PTK2  | ENST00000519419 | p.R152K  | c.455       | 0.013396501 | 0     | 1 |
| 1058 KDR   | ENST00000263923 | p.R842L  | c.2525      | 0.209477867 | 6.066 | 1 |
| 1058 KDR   | ENST00000263923 | p.R1032Q | c.3095      | 2.19518704  | 0     | 3 |
| 1058 KDR   | ENST00000263923 | p.D1052N | c.3154      | 0.157333724 | 9.599 | 1 |
| 1058 KDR   | ENST00000263923 | p.D1056N | c.3166      | 0.1900731   | 4.036 | 1 |
| 1058 KDR   | ENST00000263923 | p.G1063E | c.3188      | 0.362990083 | 3.083 | 1 |
| 1059 ADA   | ENST00000372874 | p.V12M   | c.34        | 0.081729459 | 0     | 1 |
| 1059 ADA   | ENST00000372874 | p.A329V  | c.986       | 0.081729459 | 3.613 | 1 |
| 1060 CAND1 | ENST00000545606 | p.L184F  | c.552       | 0.007380836 | 7.082 | 1 |
| 1060 CAND1 | ENST00000545606 | p.T231A  | c.691       | 0.015894525 | 0     | 1 |
| 1060 CAND1 | ENST00000545606 | p.Y274C  | c.821       | 0.008513688 | 6.876 | 1 |
| 1061 F2    | ENST00000311907 | p.T351I  | c.1052      | 0.131387946 | 7.751 | 1 |
| 1061 F2    | ENST00000311907 | p.K469N  | c.1407      | 0.175569244 | 8.594 | 1 |
| 1061 F2    | ENST00000311907 | p.P471A  | c.1411      | 2.149472561 | 0     | 1 |
| 1061 F2    | ENST00000311907 | p.P471S  | c.1411      | 2.149472561 | 0     | 2 |
| 1061 F2    | ENST00000311907 | p.L492V  | c.1474      | 0.62245784  | 3.321 | 1 |
| 1061 F2    | ENST00000311907 | p.G569E  | c.1706      | 0.153806494 | 7.677 | 1 |
| 1061 F2    | ENST00000311907 | p.P577S  | c.1729      | 0.436839274 | 4.745 | 1 |
| 1062 CUTC  | ENST00000370476 | p.P154L  | c.461       | 0.010089511 | 6.631 | 1 |
| 1062 CUTC  | ENST00000370476 | p.R187Q  | c.560       | 0.022967043 | 0     | 1 |
| 1062 CUTC  | ENST00000370476 | p.S216L  | c.647       | 0.012877533 | 6.279 | 1 |
| 1063 GBP1  | ENST00000370473 | p.M139V  | c.415       | 0.009545259 | 6.711 | 1 |
| 1063 GBP1  | ENST00000370473 | p.L224I  | c.670       | 0.009545259 | 0     | 1 |
| 1064 CXCR1 | ENST00000295683 | p.R203Q  | c.608       | 0.050520054 | 0     | 1 |
| 1064 CXCR1 | ENST00000295683 | p.T266I  | c.797       | 0.050520054 | 4.307 | 1 |
| 1065 PMS2  | ENST00000265849 | p.L359F  | c.1077      | 0.027699428 | 5.174 | 1 |
| 1065 PMS2  | ENST00000265849 | p.G361R  | c.1081      | 0.022765611 | 5.457 | 1 |
| 1065 PMS2  | ENST00000265849 | p.M362I  | c.1086      | 0.012056876 | 6.374 | 1 |

|      |         |                 |          |             |             |       |   |
|------|---------|-----------------|----------|-------------|-------------|-------|---|
| 1065 | PMS2    | ENST00000265849 | p.Y313C  | c.938       | 0.062521916 | 0     | 1 |
| 1066 | FLT3    | ENST00000380982 | p.H276Y  | c.826       | 0.014680043 | 6.09  | 1 |
| 1066 | FLT3    | ENST00000380982 | p.R311Q  | c.932       | 0.014680043 | 0     | 1 |
| 1067 | AKR1C1  | ENST00000434459 | p.A44T   | c.130       | 0.059829466 | 4.063 | 1 |
| 1067 | AKR1C1  | ENST00000434459 | p.R278T  | c.833       | 0.059829466 | 0     | 1 |
| 1068 | SAE1    | ENST00000270225 | p.K335T  | c.1004      | 0.009786441 | 0     | 1 |
| 1068 | SAE1    | ENST00000270225 | p.D290E  | c.870       | 0.009786441 | 6.675 | 1 |
| 1069 | PTPRR   | ENST00000283228 | p.D385N  | c.1153      | 0.020375793 | 5.617 | 1 |
| 1069 | PTPRR   | ENST00000283228 | p.C645Y  | c.1934      | 0.020375793 | 0     | 1 |
| 1070 | MSH6    | ENST00000234420 | p.D422G  | c.1265      | 0.017349044 | 5.849 | 1 |
| 1070 | MSH6    | ENST00000234420 | p.L423I  | c.1267      | 0.04993988  | 4.658 | 1 |
| 1070 | MSH6    | ENST00000234420 | p.V480L  | c.1438      | 0.064283585 | 0     | 1 |
| 1070 | MSH6    | ENST00000234420 | p.K519N  | c.1557      | 0.007324774 | 7.093 | 1 |
| 1071 | C5      | ENST00000223642 | p.H753Y  | c.2257      | 0.049496927 | 5.46  | 1 |
| 1071 | C5      | ENST00000223642 | p.Y1399C | c.4196      | 0.277881467 | 2.895 | 1 |
| 1071 | C5      | ENST00000223642 | p.I1402T | c.4205      | 0.095532135 | 4.497 | 1 |
| 1071 | C5      | ENST00000223642 | p.R1478W | c.4432      | 1.201441288 | 0     | 2 |
| 1072 | PTPN3   | ENST00000374541 | p.R749Q  | c.2246      | 0.239956717 | 0     | 1 |
| 1072 | PTPN3   | ENST00000374541 | p.D811E  | c.2433      | 0.140402071 | 2.988 | 1 |
| 1072 | PTPN3   | ENST00000374541 | p.H812L  | c.2435      | 0.128270674 | 3.134 | 1 |
| 1073 | ARHGEF4 | ENST00000409359 | p.P972S  | c.2914      | 0.179267071 | 8.198 | 1 |
| 1073 | ARHGEF4 | ENST00000409359 | p.A982T  | c.2944      | 0.098824004 | 8.597 | 1 |
| 1073 | ARHGEF4 | ENST00000409359 | p.T984M  | c.2951      | 0.11013831  | 8.43  | 1 |
| 1073 | ARHGEF4 | ENST00000409359 | p.G985R  | c.2952_2953 | 1.043548238 | 0     | 1 |
| 1073 | ARHGEF4 | ENST00000409359 | p.G985V  | c.2954      | 1.043548238 | 0     | 1 |
| 1074 | HSPA8   | ENST00000227378 | p.K128E  | c.382       | 0.106727214 | 3.228 | 1 |
| 1074 | HSPA8   | ENST00000227378 | p.A165S  | c.493       | 0.106727214 | 0     | 1 |
| 1076 | CASQ1   | ENST00000368078 | p.R48C   | c.142       | 0.032163285 | 0     | 1 |
| 1076 | CASQ1   | ENST00000368078 | p.V98I   | c.292       | 0.024398015 | 6.194 | 1 |
| 1076 | CASQ1   | ENST00000368078 | p.G107R  | c.319       | 0.018504244 | 5.756 | 1 |
| 1077 | EIF4A3  | ENST00000269349 | p.D77H   | c.229       | 0.122188783 | 4.142 | 1 |
| 1077 | EIF4A3  | ENST00000269349 | p.A80T   | c.238       | 0.323377284 | 2.669 | 1 |
| 1077 | EIF4A3  | ENST00000269349 | p.R238C  | c.712       | 1.213876993 | 0     | 2 |
| 1078 | CRABP2  | ENST00000368222 | p.V59L   | c.175       | 0.066038747 | 7.053 | 1 |
| 1078 | CRABP2  | ENST00000368222 | p.R60H   | c.179       | 1.155257145 | 0     | 2 |
| 1078 | CRABP2  | ENST00000368222 | p.A33D   | c.98        | 0.34643023  | 2.759 | 1 |
| 1079 | DNM3    | ENST00000355305 | p.L71R   | c.212       | 0.077625739 | 7.998 | 1 |
| 1079 | DNM3    | ENST00000355305 | p.E79K   | c.235       | 0.117296068 | 6.529 | 1 |
| 1079 | DNM3    | ENST00000355305 | p.V129M  | c.385       | 1.01474034  | 0     | 2 |
| 1080 | HMBS    | ENST00000537841 | p.P89F   | c.265_266   | 0.090997179 | 5.671 | 1 |
| 1080 | HMBS    | ENST00000537841 | p.Y196H  | c.586       | 0.358136198 | 3.139 | 1 |
| 1080 | HMBS    | ENST00000537841 | p.R229H  | c.686       | 1.147775031 | 0     | 2 |
| 1080 | HMBS    | ENST00000537841 | p.V250M  | c.748       | 0.158129548 | 6.095 | 1 |
| 1081 | GBE1    | ENST00000429644 | p.V78I   | c.232       | 0.085540768 | 0     | 1 |
| 1081 | GBE1    | ENST00000429644 | p.Y114C  | c.341       | 0.038475484 | 4.874 | 1 |
| 1081 | GBE1    | ENST00000429644 | p.L142F  | c.426       | 0.055812259 | 4.281 | 1 |
| 1082 | FBXO4   | ENST00000281623 | p.G183E  | c.548       | 0.004954654 | 0     | 1 |
| 1082 | FBXO4   | ENST00000281623 | p.I235M  | c.705       | 0.004954654 | 7.657 | 1 |
| 1083 | CPSF3   | ENST00000238112 | p.K410T  | c.1229      | 0.038233242 | 4.807 | 1 |

|      |          |                 |          |             |             |       |   |
|------|----------|-----------------|----------|-------------|-------------|-------|---|
| 1083 | CPSF3    | ENST00000238112 | p.P411L  | c.1232      | 0.072777601 | 3.831 | 1 |
| 1083 | CPSF3    | ENST00000238112 | p.P198R  | c.593       | 0.105990506 | 0     | 1 |
| 1084 | CTSH     | ENST00000220166 | p.K133I  | c.398       | 0.160205991 | 2.642 | 1 |
| 1084 | CTSH     | ENST00000220166 | p.S163F  | c.488       | 0.160205991 | 0     | 1 |
| 1085 | RPS11    | ENST00000270625 | p.R84G   | c.250       | 0.049752412 | 0     | 1 |
| 1085 | RPS11    | ENST00000270625 | p.P115S  | c.343       | 0.048731553 | 4.359 | 1 |
| 1085 | RPS11    | ENST00000270625 | p.T137A  | c.409       | 0.005201675 | 9.936 | 1 |
| 1086 | RBMS2    | ENST00000262031 | p.K55N   | c.165       | 0.20862732  | 0     | 1 |
| 1086 | RBMS2    | ENST00000262031 | p.Q129H  | c.387       | 0.20862732  | 2.261 | 1 |
| 1087 | BRAF     | ENST00000288602 | p.K205Q  | c.613       | 0.009532035 | 6.713 | 1 |
| 1087 | BRAF     | ENST00000288602 | p.E228V  | c.683       | 0.009532035 | 0     | 1 |
| 1088 | SERPINB1 | ENST00000380739 | p.P348R  | c.1044_1043 | 0.214309275 | 3.34  | 1 |
| 1088 | SERPINB1 | ENST00000380739 | p.E349K  | c.1045      | 0.186245444 | 3.562 | 1 |
| 1088 | SERPINB1 | ENST00000380739 | p.R215H  | c.644       | 0.012821764 | 8.49  | 1 |
| 1088 | SERPINB1 | ENST00000380739 | p.E268K  | c.802       | 1.186206823 | 0     | 1 |
| 1088 | SERPINB1 | ENST00000380739 | p.E268G  | c.803       | 1.186206823 | 0     | 1 |
| 1089 | C8B      | ENST00000371237 | p.W551C  | c.1653      | 1.140463155 | 0     | 2 |
| 1089 | C8B      | ENST00000371237 | p.R561C  | c.1681      | 1.134014617 | 6.315 | 2 |
| 1089 | C8B      | ENST00000371237 | p.E586Q  | c.1756      | 0.452518175 | 3.116 | 1 |
| 1090 | GMPS     | ENST00000496455 | p.R337T  | c.1010      | 0.058940108 | 4.343 | 1 |
| 1090 | GMPS     | ENST00000496455 | p.Y526C  | c.1577      | 0.082559642 | 0     | 1 |
| 1090 | GMPS     | ENST00000496455 | p.W692L  | c.2075      | 0.042949729 | 4.909 | 1 |
| 1091 | DSG2     | ENST00000261590 | p.W51L   | c.152       | 0.374051511 | 2.008 | 1 |
| 1091 | DSG2     | ENST00000261590 | p.I73M   | c.219       | 0.334061289 | 2.261 | 1 |
| 1091 | DSG2     | ENST00000261590 | p.L143F  | c.429       | 0.457244862 | 0     | 1 |
| 1092 | AKR1D1   | ENST00000242375 | p.R261C  | c.781       | 1.009188213 | 0     | 2 |
| 1092 | AKR1D1   | ENST00000242375 | p.N283K  | c.849       | 0.118533401 | 6.766 | 1 |
| 1093 | BLM      | ENST00000355112 | p.R643C  | c.1927      | 0.546029843 | 3.23  | 1 |
| 1093 | BLM      | ENST00000355112 | p.Y784C  | c.2351      | 0.18993881  | 8.323 | 1 |
| 1093 | BLM      | ENST00000355112 | p.S823F  | c.2468      | 0.416285357 | 5.586 | 1 |
| 1093 | BLM      | ENST00000355112 | p.P825Q  | c.2474      | 2.130520397 | 0     | 2 |
| 1093 | BLM      | ENST00000355112 | p.P825H  | c.2474_2475 | 2.130520397 | 0     | 1 |
| 1094 | ARR3     | ENST00000307959 | p.R370W  | c.1108      | 0.02547101  | 5.295 | 1 |
| 1094 | ARR3     | ENST00000307959 | p.S123C  | c.368       | 0.02547101  | 0     | 1 |
| 1095 | PTPRS    | ENST00000372412 | p.R1422C | c.4264      | 0.023067413 | 5.438 | 1 |
| 1095 | PTPRS    | ENST00000372412 | p.P1470H | c.4409      | 0.023067413 | 0     | 1 |
| 1096 | TCN2     | ENST00000215838 | p.L337I  | c.1009      | 0.136118155 | 3.144 | 1 |
| 1096 | TCN2     | ENST00000215838 | p.L398I  | c.1192      | 0.143847959 | 2.952 | 1 |
| 1096 | TCN2     | ENST00000215838 | p.E421V  | c.1262      | 0.24235465  | 0     | 1 |
| 1097 | AKT2     | ENST00000424901 | p.T199S  | c.596       | 0.013849714 | 6.174 | 1 |
| 1097 | AKT2     | ENST00000424901 | p.R274P  | c.821       | 0.013849714 | 0     | 1 |
| 1098 | PKLR     | ENST00000342741 | p.R449L  | c.1346      | 0.02121164  | 6.559 | 1 |
| 1098 | PKLR     | ENST00000342741 | p.R531C  | c.1591      | 1.01060582  | 0     | 1 |
| 1098 | PKLR     | ENST00000342741 | p.R531H  | c.1592      | 1.01060582  | 0     | 1 |
| 1099 | F5       | ENST00000367796 | p.S2072Y | c.6215      | 0.121322904 | 4.064 | 1 |
| 1099 | F5       | ENST00000367796 | p.K2137N | c.6411      | 0.104743598 | 8.434 | 1 |
| 1099 | F5       | ENST00000367796 | p.T2139M | c.6416      | 1.091897417 | 0     | 2 |
| 1099 | F5       | ENST00000367796 | p.I2201F | c.6601      | 0.159143568 | 5.097 | 1 |
| 1101 | BACE2    | ENST00000330333 | p.R372H  | c.1115      | 0.241126943 | 0     | 1 |

|                |                 |          |             |             |       |   |
|----------------|-----------------|----------|-------------|-------------|-------|---|
| 1101 BACE2     | ENST00000330333 | p.I444S  | c.1331      | 0.12703015  | 3.256 | 1 |
| 1101 BACE2     | ENST00000330333 | p.W154C  | c.462       | 0.0172084   | 6.156 | 1 |
| 1101 BACE2     | ENST00000330333 | p.T155M  | c.464       | 0.136959613 | 3.03  | 1 |
| 1102 CUL3      | ENST00000264414 | p.R173L  | c.518       | 0.13009496  | 4.003 | 1 |
| 1102 CUL3      | ENST00000264414 | p.E243K  | c.727       | 1.06237017  | 0     | 2 |
| 1103 AKR7A2    | ENST00000235835 | p.A338T  | c.1012      | 0.083261205 | 0     | 1 |
| 1103 AKR7A2    | ENST00000235835 | p.A279T  | c.835       | 0.048293264 | 4.424 | 1 |
| 1103 AKR7A2    | ENST00000235835 | p.A283T  | c.847       | 0.03838507  | 4.769 | 1 |
| 1105 EPHB2     | ENST00000400191 | p.W43L   | c.128       | 0.021477948 | 6.541 | 1 |
| 1105 EPHB2     | ENST00000400191 | p.R74Q   | c.221       | 1.010738974 | 0     | 2 |
| 1106 SCLY      | ENST00000254663 | p.Y269F  | c.806       | 0.009361789 | 0     | 1 |
| 1106 SCLY      | ENST00000254663 | p.K315N  | c.945       | 0.009361789 | 6.739 | 1 |
| 1107 CAMK2B    | ENST00000395749 | p.G166W  | c.496       | 0.031576608 | 0     | 1 |
| 1107 CAMK2B    | ENST00000395749 | p.P243L  | c.728       | 0.031576608 | 4.985 | 1 |
| 1108 ACTN2     | ENST00000542672 | p.E386K  | c.1156      | 1.060948443 | 0     | 2 |
| 1108 ACTN2     | ENST00000542672 | p.T716M  | c.2147      | 0.011335564 | 7.463 | 1 |
| 1108 ACTN2     | ENST00000542672 | p.R721C  | c.2161      | 0.12908605  | 4.741 | 1 |
| 1108 ACTN2     | ENST00000542672 | p.R307L  | c.920       | 0.032667503 | 5.936 | 1 |
| 1108 ACTN2     | ENST00000542672 | p.R328Q  | c.983       | 0.175411853 | 9.332 | 1 |
| 1110 SERPINA10 | ENST00000261994 | p.E392K  | c.1174      | 0.062558053 | 4.394 | 1 |
| 1110 SERPINA10 | ENST00000261994 | p.D247H  | c.739       | 0.068180854 | 0     | 1 |
| 1110 SERPINA10 | ENST00000261994 | p.G271D  | c.812       | 0.021597943 | 5.6   | 1 |
| 1111 MEN1      | ENST00000394376 | p.D348N  | c.1042_1041 | 0.013267129 | 0     | 1 |
| 1111 MEN1      | ENST00000394376 | p.G424D  | c.1271      | 0.013267129 | 6.236 | 1 |
| 1112 PTPRM     | ENST00000400060 | p.L125Q  | c.374       | 0.007119541 | 7.134 | 1 |
| 1112 PTPRM     | ENST00000400060 | p.V157L  | c.469       | 0.007119541 | 0     | 1 |
| 1113 CR1       | ENST00000367052 | p.A1405T | c.4213      | 0.020319377 | 0     | 1 |
| 1113 CR1       | ENST00000367052 | p.R1427H | c.4280      | 0.020319377 | 5.621 | 1 |
| 1114 NQO2      | ENST00000380430 | p.Q101H  | c.303       | 0.073324167 | 6.205 | 1 |
| 1114 NQO2      | ENST00000380430 | p.A143V  | c.428       | 0.083968994 | 0     | 1 |
| 1114 NQO2      | ENST00000380430 | p.P187T  | c.559       | 0.070413702 | 3.828 | 1 |
| 1115 LHX9      | ENST00000367387 | p.M270T  | c.809       | 0.293730891 | 1.943 | 1 |
| 1115 LHX9      | ENST00000367387 | p.H277N  | c.829       | 0.16306394  | 2.95  | 1 |
| 1115 LHX9      | ENST00000367387 | p.G305C  | c.913       | 0.389483182 | 0     | 1 |
| 1116 ESR2      | ENST00000341099 | p.D421G  | c.1262      | 0.061292953 | 6.157 | 1 |
| 1116 ESR2      | ENST00000341099 | p.S422I  | c.1265      | 0.431111754 | 2.353 | 1 |
| 1116 ESR2      | ENST00000341099 | p.R501C  | c.1501      | 0.039684138 | 5.79  | 1 |
| 1116 ESR2      | ENST00000341099 | p.E321K  | c.961       | 0.076933355 | 7.259 | 1 |
| 1116 ESR2      | ENST00000341099 | p.D326H  | c.976       | 1.234354353 | 0     | 1 |
| 1116 ESR2      | ENST00000341099 | p.D326G  | c.977       | 1.234354353 | 0     | 1 |
| 1117 ESYT2     | ENST00000251527 | p.R569C  | c.1705      | 0.027950153 | 0     | 1 |
| 1117 ESYT2     | ENST00000251527 | p.L592I  | c.1774      | 0.027950153 | 5.161 | 1 |
| 1118 KCNK4     | ENST00000539216 | p.R117C  | c.349       | 0.01683958  | 0     | 1 |
| 1118 KCNK4     | ENST00000539216 | p.A247T  | c.739       | 0.01683958  | 5.892 | 1 |
| 1119 TDRD5     | ENST00000444136 | p.L48F   | c.142       | 0.066661611 | 3.907 | 1 |
| 1119 TDRD5     | ENST00000444136 | p.I7T    | c.20        | 0.066661611 | 0     | 1 |
| 1120 ITGAX     | ENST00000562522 | p.E348K  | c.1042      | 0.097845027 | 0     | 1 |
| 1120 ITGAX     | ENST00000562522 | p.A369S  | c.1105      | 0.007411596 | 7.076 | 1 |
| 1120 ITGAX     | ENST00000562522 | p.G371R  | c.1111      | 0.09043343  | 3.467 | 1 |

|      |          |                 |         |        |             |       |   |
|------|----------|-----------------|---------|--------|-------------|-------|---|
| 1121 | TPP1     | ENST00000299427 | p.R375C | c.1123 | 1.120414244 | 0     | 2 |
| 1121 | TPP1     | ENST00000299427 | p.S413N | c.1238 | 0.052706643 | 5.313 | 1 |
| 1121 | TPP1     | ENST00000299427 | p.D328Y | c.982  | 0.192914364 | 3.392 | 1 |
| 1122 | AASDHPPT | ENST00000278618 | p.R38L  | c.113  | 0.076150641 | 0     | 1 |
| 1122 | AASDHPPT | ENST00000278618 | p.P286L | c.857  | 0.076150641 | 3.715 | 1 |
| 1123 | DUSP22   | ENST00000419235 | p.V96M  | c.286  | 0.056838016 | 4.137 | 1 |
| 1123 | DUSP22   | ENST00000419235 | p.V118L | c.352  | 0.056838016 | 0     | 1 |
| 1124 | CPA1     | ENST0000011292  | p.Q359E | c.1075 | 0.036906021 | 0     | 1 |
| 1124 | CPA1     | ENST0000011292  | p.K319T | c.956  | 0.036906021 | 4.76  | 1 |
| 1125 | TSN      | ENST00000389682 | p.G48S  | c.142  | 0.022939854 | 5.446 | 1 |
| 1125 | TSN      | ENST00000389682 | p.T160N | c.479  | 0.045457242 | 0     | 1 |
| 1125 | TSN      | ENST00000389682 | p.R182H | c.545  | 0.03324615  | 6.45  | 1 |
| 1125 | TSN      | ENST00000389682 | p.V208L | c.622  | 0.011079219 | 6.496 | 1 |
| 1126 | TGM3     | ENST00000381458 | p.D674H | c.2020 | 1.006857983 | 0     | 1 |
| 1126 | TGM3     | ENST00000381458 | p.D674N | c.2020 | 1.006857983 | 0     | 1 |
| 1126 | TGM3     | ENST00000381458 | p.P247S | c.739  | 0.013715966 | 7.188 | 1 |
| 1127 | OTC      | ENST0000039007  | p.E87K  | c.259  | 0.238741928 | 8.924 | 1 |
| 1127 | OTC      | ENST0000039007  | p.R92Q  | c.275  | 1.018301663 | 0     | 2 |
| 1127 | OTC      | ENST0000039007  | p.R141P | c.422  | 0.280503521 | 6.082 | 1 |
| 1127 | OTC      | ENST0000039007  | p.L163P | c.488  | 0.117299074 | 9.399 | 1 |
| 1128 | CXCL10   | ENST00000306602 | p.A53P  | c.157  | 0.083620472 | 3.58  | 1 |
| 1128 | CXCL10   | ENST00000306602 | p.E92V  | c.275  | 0.083620472 | 0     | 1 |
| 1129 | CMA1     | ENST00000250378 | p.K49E  | c.145  | 0.389320354 | 4.554 | 1 |
| 1129 | CMA1     | ENST00000250378 | p.V61M  | c.181  | 0.083419964 | 6.94  | 1 |
| 1129 | CMA1     | ENST00000250378 | p.T63M  | c.188  | 1.255004527 | 0     | 2 |
| 1129 | CMA1     | ENST00000250378 | p.H66Q  | c.198  | 0.027139473 | 8.56  | 1 |
| 1129 | CMA1     | ENST00000250378 | p.W149L | c.446  | 0.393561601 | 6.661 | 1 |
| 1129 | CMA1     | ENST00000250378 | p.G201R | c.601  | 0.735858108 | 2.636 | 1 |
| 1129 | CMA1     | ENST00000250378 | p.I22V  | c.64   | 0.299648841 | 8.564 | 1 |
| 1129 | CMA1     | ENST00000250378 | p.R221W | c.661  | 0.062230273 | 5.146 | 1 |
| 1130 | RAB1B    | ENST00000311481 | p.Y88C  | c.263  | 0.024066632 | 0     | 1 |
| 1130 | RAB1B    | ENST00000311481 | p.L117F | c.349  | 0.013530785 | 7.67  | 1 |
| 1130 | RAB1B    | ENST00000311481 | p.V130A | c.389  | 0.006726166 | 7.216 | 1 |
| 1130 | RAB1B    | ENST00000311481 | p.T150M | c.449  | 0.021050834 | 6.33  | 1 |
| 1131 | FGB      | ENST00000302068 | p.E339Q | c.1015 | 1.044688252 | 0     | 2 |
| 1131 | FGB      | ENST00000302068 | p.L341S | c.1022 | 0.086553041 | 8.536 | 1 |
| 1131 | FGB      | ENST00000302068 | p.S371L | c.1112 | 0.017603425 | 6.828 | 1 |
| 1131 | FGB      | ENST00000302068 | p.E275K | c.823  | 0.147549862 | 4.913 | 1 |
| 1132 | PRKAR1B  | ENST00000403562 | p.Y113H | c.337  | 0.009112104 | 6.778 | 1 |
| 1132 | PRKAR1B  | ENST00000403562 | p.G208C | c.622  | 0.005336095 | 7.55  | 1 |
| 1132 | PRKAR1B  | ENST00000403562 | p.R232Q | c.695  | 0.014448199 | 0     | 1 |
| 1133 | CTPS2    | ENST00000359276 | p.Y42C  | c.125  | 0.109509946 | 0     | 1 |
| 1133 | CTPS2    | ENST00000359276 | p.G91V  | c.272  | 0.092450045 | 3.462 | 1 |
| 1133 | CTPS2    | ENST00000359276 | p.K92N  | c.276  | 0.020465206 | 5.736 | 1 |
| 1134 | TRPV4    | ENST00000261740 | p.R160Q | c.479  | 0.011557142 | 0     | 1 |
| 1134 | TRPV4    | ENST00000261740 | p.R206H | c.617  | 0.005380664 | 7.538 | 1 |
| 1134 | TRPV4    | ENST00000261740 | p.D208N | c.622  | 0.006176477 | 7.339 | 1 |
| 1135 | RAP1GAP  | ENST00000374763 | p.F211V | c.631  | 0.030482399 | 5.607 | 1 |
| 1135 | RAP1GAP  | ENST00000374763 | p.G289R | c.865  | 0.179616884 | 0     | 1 |

|      |          |                 |         |           |             |       |   |
|------|----------|-----------------|---------|-----------|-------------|-------|---|
| 1135 | RAP1GAP  | ENST00000374763 | p.S311F | c.932     | 0.16422164  | 2.652 | 1 |
| 1136 | PVRL3    | ENST00000485303 | p.R242M | c.725     | 0.118585539 | 0     | 1 |
| 1136 | PVRL3    | ENST00000485303 | p.L263V | c.787     | 0.118585539 | 3.076 | 1 |
| 1137 | RNGTT    | ENST00000369485 | p.R452Q | c.1355    | 0.083645201 | 3.825 | 1 |
| 1137 | RNGTT    | ENST00000369485 | p.D455A | c.1364    | 0.048850489 | 4.538 | 1 |
| 1137 | RNGTT    | ENST00000369485 | p.V274I | c.820     | 0.113605589 | 0     | 1 |
| 1138 | RHCG     | ENST00000268122 | p.D426Y | c.1276    | 0.358874869 | 2.57  | 1 |
| 1138 | RHCG     | ENST00000268122 | p.C429S | c.1285    | 0.284132094 | 2.932 | 1 |
| 1138 | RHCG     | ENST00000268122 | p.S207I | c.620     | 1.299437007 | 0     | 1 |
| 1138 | RHCG     | ENST00000268122 | p.S207N | c.620     | 1.299437007 | 0     | 1 |
| 1139 | ARHGEF12 | ENST00000397843 | p.V73I  | c.217     | 0.048356806 | 0     | 1 |
| 1139 | ARHGEF12 | ENST00000397843 | p.A103V | c.308     | 0.041006602 | 4.608 | 1 |
| 1139 | ARHGEF12 | ENST00000397843 | p.R113Q | c.338     | 0.037640511 | 7.088 | 1 |
| 1140 | KDM4C    | ENST00000381309 | p.V49L  | c.145     | 0.066661611 | 0     | 1 |
| 1140 | KDM4C    | ENST00000381309 | p.E268K | c.802     | 0.066661611 | 3.907 | 1 |
| 1142 | SMAD1    | ENST00000302085 | p.H335N | c.1003    | 0.018325546 | 6.77  | 1 |
| 1142 | SMAD1    | ENST00000302085 | p.I382N | c.1145    | 1.021725569 | 0     | 1 |
| 1142 | SMAD1    | ENST00000302085 | p.I382M | c.1146    | 1.021725569 | 0     | 1 |
| 1142 | SMAD1    | ENST00000302085 | p.R413C | c.1237    | 0.019382179 | 7.779 | 1 |
| 1142 | SMAD1    | ENST00000302085 | p.L440V | c.1318    | 0.045253893 | 6.964 | 1 |
| 1143 | GRIA2    | ENST00000296526 | p.A149T | c.445     | 0.095449995 | 6.495 | 1 |
| 1143 | GRIA2    | ENST00000296526 | p.R205L | c.614     | 1.023236058 | 0     | 1 |
| 1143 | GRIA2    | ENST00000296526 | p.R205Q | c.614     | 1.023236058 | 0     | 1 |
| 1143 | GRIA2    | ENST00000296526 | p.V230I | c.688     | 0.024298314 | 6.363 | 1 |
| 1144 | DDR1     | ENST00000513240 | p.R128H | c.383     | 0.011589804 | 6.431 | 1 |
| 1144 | DDR1     | ENST00000513240 | p.G227V | c.680     | 0.011589804 | 0     | 1 |
| 1145 | FAP      | ENST00000188790 | p.F350L | c.1050    | 0.058395459 | 4.098 | 1 |
| 1145 | FAP      | ENST00000188790 | p.P544H | c.1631    | 0.058395459 | 0     | 1 |
| 1146 | YWHAE    | ENST00000264335 | p.L44F  | c.130     | 0.040190546 | 0     | 1 |
| 1146 | YWHAE    | ENST00000264335 | p.A11V  | c.32      | 0.040190546 | 4.637 | 1 |
| 1147 | SERPINB5 | ENST00000382771 | p.V57L  | c.169     | 0.084905393 | 0     | 1 |
| 1147 | SERPINB5 | ENST00000382771 | p.G292W | c.874     | 0.084905393 | 3.558 | 1 |
| 1148 | CYP2E1   | ENST00000252945 | p.R146W | c.436     | 0.187002846 | 7.943 | 1 |
| 1148 | CYP2E1   | ENST00000252945 | p.I183M | c.549     | 0.174031821 | 4.699 | 1 |
| 1148 | CYP2E1   | ENST00000252945 | p.L184F | c.550     | 0.229806209 | 2.361 | 1 |
| 1148 | CYP2E1   | ENST00000252945 | p.R186L | c.557     | 0.024302434 | 6.117 | 1 |
| 1148 | CYP2E1   | ENST00000252945 | p.T266S | c.797     | 0.291671873 | 0     | 1 |
| 1148 | CYP2E1   | ENST00000252945 | p.I289M | c.867     | 0.064040479 | 4.702 | 1 |
| 1148 | CYP2E1   | ENST00000252945 | p.G300R | c.898     | 0.034908961 | 9.266 | 1 |
| 1149 | PLCB3    | ENST00000279230 | p.R430C | c.1288    | 0.008572906 | 6.866 | 1 |
| 1149 | PLCB3    | ENST00000279230 | p.E588V | c.1763    | 0.008572906 | 0     | 1 |
| 1150 | MAPK10   | ENST00000359221 | p.M238L | c.712     | 0.109348096 | 3.193 | 1 |
| 1150 | MAPK10   | ENST00000359221 | p.L290M | c.868     | 0.109348096 | 0     | 1 |
| 1151 | TBX3     | ENST00000257566 | p.P103T | c.307     | 1.086090628 | 0     | 1 |
| 1151 | TBX3     | ENST00000257566 | p.P103Q | c.309_308 | 1.086090628 | 0     | 1 |
| 1151 | TBX3     | ENST00000257566 | p.R251Q | c.752     | 0.172181256 | 3.538 | 1 |
| 1152 | RBBP7    | ENST00000380084 | p.R172C | c.514     | 3.135554962 | 0     | 2 |
| 1152 | RBBP7    | ENST00000380084 | p.R172H | c.515     | 3.135554962 | 0     | 2 |
| 1152 | RBBP7    | ENST00000380084 | p.Y224C | c.671     | 0.497461371 | 3.05  | 1 |

|                |                 |          |           |             |       |   |
|----------------|-----------------|----------|-----------|-------------|-------|---|
| 1152 RBBP7     | ENST00000380084 | p.N320H  | c.958     | 0.067555558 | 6.077 | 1 |
| 1153 PNPT1     | ENST00000447944 | p.I462M  | c.1386    | 0.006624375 | 7.238 | 1 |
| 1153 PNPT1     | ENST00000447944 | p.S210Y  | c.629     | 0.004271623 | 7.871 | 1 |
| 1153 PNPT1     | ENST00000447944 | p.E234D  | c.702     | 0.010895998 | 0     | 1 |
| 1154 ADCYAP1R1 | ENST00000409489 | p.G56R   | c.166     | 0.150100428 | 2.736 | 1 |
| 1154 ADCYAP1R1 | ENST00000409489 | p.D102N  | c.304     | 0.150100428 | 0     | 1 |
| 1155 SPOP      | ENST00000503676 | p.Y87S   | c.260     | 0.649846313 | 2.548 | 1 |
| 1155 SPOP      | ENST00000503676 | p.P94R   | c.281     | 0.227428579 | 4.725 | 1 |
| 1155 SPOP      | ENST00000503676 | p.R121Q  | c.362     | 1.118275762 | 8.985 | 2 |
| 1155 SPOP      | ENST00000503676 | p.W131G  | c.391     | 2.234095683 | 0     | 1 |
| 1155 SPOP      | ENST00000503676 | p.W131R  | c.391     | 2.234095683 | 0     | 1 |
| 1155 SPOP      | ENST00000503676 | p.W131C  | c.393     | 2.234095683 | 0     | 1 |
| 1155 SPOP      | ENST00000503676 | p.F133C  | c.398     | 0.233547001 | 5.55  | 1 |
| 1156 FLT3LG    | ENST00000600429 | p.A42T   | c.124     | 0.002636793 | 0     | 1 |
| 1156 FLT3LG    | ENST00000600429 | p.R100C  | c.298     | 0.002636793 | 8.567 | 1 |
| 1157 RXRG      | ENST00000359842 | p.R238G  | c.712     | 0.008037709 | 6.959 | 1 |
| 1157 RXRG      | ENST00000359842 | p.W283Y  | c.849_848 | 0.008037709 | 0     | 1 |
| 1158 AIM2      | ENST00000368130 | p.L294Q  | c.881     | 1.068726009 | 0     | 2 |
| 1158 AIM2      | ENST00000368130 | p.T327I  | c.980     | 0.137452019 | 3.863 | 1 |
| 1159 HSPBP1    | ENST00000255631 | p.Q346R  | c.1037    | 0.092525831 | 0     | 1 |
| 1159 HSPBP1    | ENST00000255631 | p.V307M  | c.919     | 0.092525831 | 3.434 | 1 |
| 1160 BHMT      | ENST00000274353 | p.T339S  | c.1016    | 0.013026177 | 6.589 | 1 |
| 1160 BHMT      | ENST00000274353 | p.E162Q  | c.484     | 0.264405091 | 0     | 1 |
| 1160 BHMT      | ENST00000274353 | p.L193F  | c.579     | 0.256656157 | 1.977 | 1 |
| 1161 F7        | ENST00000375581 | p.S393L  | c.1178    | 0.201381073 | 2.312 | 1 |
| 1161 F7        | ENST00000375581 | p.A251V  | c.752     | 0.201381073 | 0     | 1 |
| 1162 TRIM69    | ENST00000329464 | p.Q200K  | c.598     | 0.039075836 | 0     | 1 |
| 1162 TRIM69    | ENST00000329464 | p.E224K  | c.670     | 0.004063673 | 7.943 | 1 |
| 1162 TRIM69    | ENST00000329464 | p.R226L  | c.677     | 0.035012163 | 4.836 | 1 |
| 1163 L3MBTL2   | ENST00000216237 | p.L185M  | c.553     | 0.026737345 | 5.225 | 1 |
| 1163 L3MBTL2   | ENST00000216237 | p.S189I  | c.566     | 0.011312017 | 6.466 | 1 |
| 1163 L3MBTL2   | ENST00000216237 | p.Q237L  | c.710     | 0.038049362 | 0     | 1 |
| 1164 HTR1B     | ENST00000369947 | p.L348Q  | c.1043    | 0.026534258 | 0     | 1 |
| 1164 HTR1B     | ENST00000369947 | p.E193K  | c.577     | 0.026534258 | 5.236 | 1 |
| 1165 CTSA      | ENST00000372484 | p.V417I  | c.1249    | 0.020688889 | 0     | 1 |
| 1165 CTSA      | ENST00000372484 | p.H243Y  | c.726_727 | 0.020688889 | 5.595 | 1 |
| 1166 KIF5B     | ENST00000302418 | p.P163L  | c.488     | 0.126695561 | 0     | 1 |
| 1166 KIF5B     | ENST00000302418 | p.R278Q  | c.833     | 0.007119541 | 7.134 | 1 |
| 1166 KIF5B     | ENST00000302418 | p.R284K  | c.851     | 0.11957602  | 3.064 | 1 |
| 1167 MGAM      | ENST00000475668 | p.R1570C | c.4708    | 0.187836216 | 4.812 | 1 |
| 1167 MGAM      | ENST00000475668 | p.R1668C | c.5002    | 1.105094433 | 0     | 2 |
| 1167 MGAM      | ENST00000475668 | p.E2460A | c.7379    | 0.147068571 | 3.934 | 1 |
| 1167 MGAM      | ENST00000475668 | p.P2599S | c.7795    | 0.122446757 | 7.941 | 1 |
| 1168 RCOR3     | ENST00000419091 | p.A425T  | c.1273    | 0.001195641 | 0     | 1 |
| 1168 RCOR3     | ENST00000419091 | p.P446S  | c.1336    | 0.001195641 | 9.708 | 1 |
| 1169 MEN1      | ENST00000394376 | p.E363K  | c.1087    | 1.010033717 | 0     | 1 |
| 1169 MEN1      | ENST00000394376 | p.E363G  | c.1088    | 1.010033717 | 0     | 1 |
| 1169 MEN1      | ENST00000394376 | p.H179Y  | c.535     | 0.020067435 | 6.639 | 1 |
| 1170 REG3A     | ENST00000305165 | p.H50N   | c.148     | 2.062283766 | 0     | 2 |



|      |         |                 |          |        |             |       |   |
|------|---------|-----------------|----------|--------|-------------|-------|---|
| 1170 | REG3A   | ENST00000305165 | p.H50Q   | c.150  | 2.062283766 | 0     | 1 |
| 1170 | REG3A   | ENST00000305165 | p.P72H   | c.215  | 0.186851299 | 4.005 | 1 |
| 1171 | DYRK1A  | ENST00000398960 | p.C286Y  | c.857  | 0.069682811 | 7.127 | 1 |
| 1171 | DYRK1A  | ENST00000398960 | p.R328L  | c.983  | 1.007154169 | 0     | 1 |
| 1171 | DYRK1A  | ENST00000398960 | p.R328Q  | c.983  | 1.007154169 | 0     | 1 |
| 1172 | MAPK7   | ENST00000308406 | p.L342F  | c.1024 | 0.098720358 | 9.185 | 1 |
| 1172 | MAPK7   | ENST00000308406 | p.L144V  | c.430  | 0.103534875 | 3.385 | 1 |
| 1172 | MAPK7   | ENST00000308406 | p.L163M  | c.487  | 0.112050371 | 3.615 | 1 |
| 1172 | MAPK7   | ENST00000308406 | p.M255R  | c.764  | 0.179056676 | 0     | 1 |
| 1173 | HNRNPA1 | ENST00000340913 | p.V60L   | c.178  | 0.182757181 | 0     | 1 |
| 1173 | HNRNPA1 | ENST00000340913 | p.L30P   | c.89   | 0.182757181 | 2.452 | 1 |
| 1174 | ME2     | ENST00000321341 | p.Q253H  | c.759  | 0.173860246 | 0     | 1 |
| 1174 | ME2     | ENST00000321341 | p.D278N  | c.832  | 0.173860246 | 2.524 | 1 |
| 1175 | LTF     | ENST00000231751 | p.R49C   | c.145  | 0.013057296 | 0     | 1 |
| 1175 | LTF     | ENST00000231751 | p.P303L  | c.908  | 0.013057296 | 6.259 | 1 |
| 1176 | ITGA4   | ENST00000397033 | p.A471V  | c.1412 | 0.285706832 | 3.345 | 1 |
| 1176 | ITGA4   | ENST00000397033 | p.S474R  | c.1422 | 0.083698293 | 6.986 | 1 |
| 1176 | ITGA4   | ENST00000397033 | p.F502L  | c.1506 | 0.158198644 | 5.084 | 1 |
| 1176 | ITGA4   | ENST00000397033 | p.M612I  | c.1836 | 1.135784624 | 0     | 2 |
| 1177 | NUP214  | ENST00000451030 | p.Q60H   | c.180  | 0.121197494 | 0     | 1 |
| 1177 | NUP214  | ENST00000451030 | p.L87F   | c.261  | 0.116922497 | 3.173 | 1 |
| 1177 | NUP214  | ENST00000451030 | p.D29E   | c.87   | 0.016425599 | 6.598 | 1 |
| 1178 | IFIT2   | ENST00000371826 | p.A157V  | c.470  | 1.005810991 | 0     | 2 |
| 1178 | IFIT2   | ENST00000371826 | p.S182I  | c.545  | 0.017667158 | 7.427 | 1 |
| 1179 | IL17F   | ENST00000336123 | p.M55I   | c.165  | 1.009264957 | 0     | 2 |
| 1179 | IL17F   | ENST00000336123 | p.Y93F   | c.278  | 0.090093061 | 6.754 | 1 |
| 1180 | TRIM33  | ENST00000358465 | p.K904Q  | c.2710 | 0.011776054 | 0     | 1 |
| 1180 | TRIM33  | ENST00000358465 | p.V939D  | c.2816 | 0.011776054 | 6.408 | 1 |
| 1181 | SUPV3L1 | ENST00000359655 | p.F100L  | c.300  | 0.013175486 | 0     | 1 |
| 1181 | SUPV3L1 | ENST00000359655 | p.L163V  | c.487  | 0.013175486 | 6.246 | 1 |
| 1182 | BMPR1B  | ENST00000440890 | p.L345S  | c.1034 | 0.161479514 | 3.298 | 1 |
| 1182 | BMPR1B  | ENST00000440890 | p.P356L  | c.1067 | 0.024023799 | 6.473 | 1 |
| 1182 | BMPR1B  | ENST00000440890 | p.L381M  | c.1141 | 0.118554702 | 3.751 | 1 |
| 1182 | BMPR1B  | ENST00000440890 | p.F422V  | c.1264 | 0.03163061  | 9.669 | 1 |
| 1182 | BMPR1B  | ENST00000440890 | p.M283T  | c.848  | 0.188432011 | 0     | 1 |
| 1183 | ACTB    | ENST00000331789 | p.Q354H  | c.1062 | 0.002023404 | 0     | 1 |
| 1183 | ACTB    | ENST00000331789 | p.M132T  | c.395  | 0.002023404 | 8.949 | 1 |
| 1184 | MYOM1   | ENST00000356443 | p.E1473K | c.4417 | 0.131066186 | 0     | 1 |
| 1184 | MYOM1   | ENST00000356443 | p.E1520K | c.4558 | 0.100359337 | 3.365 | 1 |
| 1184 | MYOM1   | ENST00000356443 | p.P1521A | c.4561 | 0.037308304 | 4.878 | 1 |
| 1185 | TRAF2   | ENST00000359662 | p.L461I  | c.1381 | 0.008662505 | 6.851 | 1 |
| 1185 | TRAF2   | ENST00000359662 | p.A518T  | c.1552 | 0.008662505 | 0     | 1 |
| 1186 | EPHA3   | ENST00000336596 | p.A651T  | c.1951 | 0.075080049 | 3.93  | 1 |
| 1186 | EPHA3   | ENST00000336596 | p.E700K  | c.2098 | 0.209993016 | 0     | 1 |
| 1186 | EPHA3   | ENST00000336596 | p.K761N  | c.2283 | 0.153858479 | 2.792 | 1 |
| 1187 | PGR     | ENST00000325455 | p.S733Y  | c.2198 | 0.057597345 | 4.248 | 1 |
| 1187 | PGR     | ENST00000325455 | p.I751F  | c.2251 | 0.099372947 | 3.405 | 1 |
| 1187 | PGR     | ENST00000325455 | p.L826V  | c.2476 | 0.147033471 | 0     | 1 |
| 1188 | MARK1   | ENST00000366917 | p.S705G  | c.2113 | 0.015657525 | 5.997 | 1 |

|      |          |                 |         |        |             |       |   |
|------|----------|-----------------|---------|--------|-------------|-------|---|
| 1188 | MARK1    | ENST00000366917 | p.F741L | c.2223 | 0.012534081 | 6.318 | 1 |
| 1188 | MARK1    | ENST00000366917 | p.R771C | c.2311 | 0.028191606 | 0     | 1 |
| 1189 | IFNA2    | ENST00000380206 | p.E81K  | c.241  | 0.196125883 | 0     | 1 |
| 1189 | IFNA2    | ENST00000380206 | p.M82K  | c.245  | 0.038107365 | 8.265 | 1 |
| 1189 | IFNA2    | ENST00000380206 | p.E136D | c.408  | 0.058095381 | 4.297 | 1 |
| 1189 | IFNA2    | ENST00000380206 | p.R143G | c.427  | 0.172119791 | 2.816 | 1 |
| 1190 | IFIH1    | ENST00000263642 | p.K551I | c.1652 | 0.011063871 | 6.498 | 1 |
| 1190 | IFIH1    | ENST00000263642 | p.M558I | c.1674 | 0.019119315 | 6.86  | 1 |
| 1190 | IFIH1    | ENST00000263642 | p.A610V | c.1829 | 0.019672504 | 0     | 1 |
| 1191 | MYL6B    | ENST00000550443 | p.V79A  | c.236  | 0.002510169 | 8.638 | 1 |
| 1191 | MYL6B    | ENST00000550443 | p.D81H  | c.241  | 0.004055232 | 7.946 | 1 |
| 1191 | MYL6B    | ENST00000550443 | p.S119L | c.356  | 0.0065654   | 0     | 1 |
| 1192 | DHH      | ENST00000266991 | p.R122H | c.365  | 0.095490368 | 0     | 1 |
| 1192 | DHH      | ENST00000266991 | p.T151M | c.452  | 0.095318608 | 3.516 | 1 |
| 1192 | DHH      | ENST00000266991 | p.R154H | c.461  | 0.039089439 | 6.952 | 1 |
| 1193 | LIPF     | ENST00000394375 | p.I68S  | c.203  | 0.061814938 | 0     | 1 |
| 1193 | LIPF     | ENST00000394375 | p.N137T | c.410  | 0.055591187 | 4.169 | 1 |
| 1193 | LIPF     | ENST00000394375 | p.D159N | c.475  | 0.006223751 | 7.328 | 1 |
| 1194 | SLAMF6   | ENST00000368057 | p.T54P  | c.160  | 0.016473709 | 9.49  | 1 |
| 1194 | SLAMF6   | ENST00000368057 | p.P80S  | c.238  | 2.002373348 | 0     | 2 |
| 1194 | SLAMF6   | ENST00000368057 | p.P80L  | c.239  | 2.002373348 | 0     | 1 |
| 1194 | SLAMF6   | ENST00000368057 | p.L119M | c.355  | 0.032716292 | 9.991 | 1 |
| 1195 | MUS81    | ENST00000308110 | p.R363C | c.1087 | 0.094208432 | 3.408 | 1 |
| 1195 | MUS81    | ENST00000308110 | p.G396V | c.1187 | 0.094208432 | 0     | 1 |
| 1196 | AKR1B1   | ENST00000285930 | p.P219L | c.656  | 0.172779026 | 0     | 1 |
| 1196 | AKR1B1   | ENST00000285930 | p.R297G | c.889  | 0.172779026 | 2.533 | 1 |
| 1197 | SERPINA1 | ENST00000448921 | p.E387K | c.1159 | 0.117358968 | 3.091 | 1 |
| 1197 | SERPINA1 | ENST00000448921 | p.H311N | c.931  | 0.117358968 | 0     | 1 |
| 1198 | MR1      | ENST00000367580 | p.P203H | c.608  | 0.054598306 | 4.195 | 1 |
| 1198 | MR1      | ENST00000367580 | p.H282Q | c.846  | 0.054598306 | 0     | 1 |
| 1199 | LIFR     | ENST00000263409 | p.P139L | c.416  | 0.101992558 | 0     | 1 |
| 1199 | LIFR     | ENST00000263409 | p.E173K | c.517  | 0.027127377 | 6.968 | 1 |
| 1199 | LIFR     | ENST00000263409 | p.Y223H | c.667  | 0.017729354 | 7.591 | 1 |
| 1199 | LIFR     | ENST00000263409 | p.S239I | c.716  | 0.099097887 | 3.493 | 1 |
| 1200 | C6       | ENST00000263413 | p.M900I | c.2700 | 0.23116298  | 0     | 1 |
| 1200 | C6       | ENST00000263413 | p.G901E | c.2702 | 0.13638934  | 6.829 | 1 |
| 1200 | C6       | ENST00000263413 | p.K923Q | c.2767 | 0.202811539 | 3.162 | 1 |
| 1200 | C6       | ENST00000263413 | p.E925K | c.2773 | 0.171872594 | 3.176 | 1 |
| 1201 | CAND1    | ENST00000545606 | p.V528I | c.1582 | 0.007340021 | 7.09  | 1 |
| 1201 | CAND1    | ENST00000545606 | p.L541I | c.1621 | 0.018879966 | 5.727 | 1 |
| 1201 | CAND1    | ENST00000545606 | p.C592S | c.1774 | 0.026219988 | 0     | 1 |
| 1202 | DHX9     | ENST00000367549 | p.V526G | c.1577 | 0.009080579 | 6.783 | 1 |
| 1202 | DHX9     | ENST00000367549 | p.R528H | c.1583 | 0.079936599 | 3.645 | 1 |
| 1202 | DHX9     | ENST00000367549 | p.F555L | c.1665 | 0.089017178 | 0     | 1 |
| 1203 | NEURL4   | ENST00000399464 | p.A108T | c.322  | 0.651133813 | 2.335 | 1 |
| 1203 | NEURL4   | ENST00000399464 | p.S131L | c.392  | 0.123383768 | 6.007 | 1 |
| 1203 | NEURL4   | ENST00000399464 | p.R163H | c.488  | 1.248684838 | 0     | 2 |
| 1203 | NEURL4   | ENST00000399464 | p.A191V | c.572  | 0.259996638 | 4.839 | 1 |
| 1204 | CHI3L1   | ENST00000255409 | p.D38V  | c.113  | 0.018135999 | 5.785 | 1 |

|      |        |                 |          |        |             |       |    |
|------|--------|-----------------|----------|--------|-------------|-------|----|
| 1204 | CHI3L1 | ENST00000255409 | p.R286Q  | c.857  | 0.018135999 | 0     | 1  |
| 1205 | IL7R   | ENST00000303115 | p.E202K  | c.604  | 1.187167926 | 0     | 2  |
| 1205 | IL7R   | ENST00000303115 | p.S223R  | c.669  | 0.367835782 | 2.461 | 1  |
| 1205 | IL7R   | ENST00000303115 | p.R227K  | c.680  | 0.012102092 | 7.494 | 1  |
| 1206 | CYP2C8 | ENST00000371270 | p.R433Q  | c.1298 | 0.153568015 | 8.552 | 1  |
| 1206 | CYP2C8 | ENST00000371270 | p.S115R  | c.343  | 0.184185934 | 5.798 | 1  |
| 1206 | CYP2C8 | ENST00000371270 | p.D293N  | c.877  | 1.020637662 | 0     | 2  |
| 1207 | TTR    | ENST00000237014 | p.R41Q   | c.122  | 0.163539262 | 3.447 | 1  |
| 1207 | TTR    | ENST00000237014 | p.T69A   | c.205  | 0.198571106 | 0     | 1  |
| 1207 | TTR    | ENST00000237014 | p.D94Y   | c.280  | 0.1787187   | 3.226 | 1  |
| 1208 | PDGFRB | ENST00000261799 | p.Q646H  | c.1938 | 0.006551314 | 0     | 1  |
| 1208 | PDGFRB | ENST00000261799 | p.R708L  | c.2123 | 0.006551314 | 7.254 | 1  |
| 1209 | CR1    | ENST00000367052 | p.R1195S | c.3585 | 0.134013942 | 0     | 1  |
| 1209 | CR1    | ENST00000367052 | p.S1217L | c.3650 | 0.028912765 | 5.26  | 1  |
| 1210 | SNRPA  | ENST00000243563 | p.R83C   | c.247  | 0.221902834 | 0     | 1  |
| 1210 | SNRPA  | ENST00000243563 | p.E25D   | c.75   | 0.221902834 | 2.172 | 1  |
| 1212 | HEXA   | ENST00000566304 | p.D336N  | c.1006 | 0.005831166 | 7.422 | 1  |
| 1212 | HEXA   | ENST00000566304 | p.T297A  | c.889  | 0.005831166 | 0     | 1  |
| 1213 | ERBB4  | ENST00000342788 | p.Y46C   | c.137  | 0.288361675 | 0     | 1  |
| 1213 | ERBB4  | ENST00000342788 | p.R50H   | c.149  | 0.21413717  | 5.948 | 1  |
| 1213 | ERBB4  | ENST00000342788 | p.E69K   | c.205  | 0.04778385  | 4.69  | 1  |
| 1213 | ERBB4  | ENST00000342788 | p.D73V   | c.218  | 0.282801928 | 2.553 | 1  |
| 1213 | ERBB4  | ENST00000342788 | p.F76L   | c.226  | 0.179080074 | 3.988 | 1  |
| 1214 | NCBP1  | ENST00000375147 | p.H570R  | c.1709 | 0.012107124 | 6.368 | 1  |
| 1214 | NCBP1  | ENST00000375147 | p.M608I  | c.1824 | 0.012107124 | 0     | 1  |
| 1215 | FLT3   | ENST00000380982 | p.G617E  | c.1850 | 1.148857106 | 6.748 | 2  |
| 1215 | FLT3   | ENST00000380982 | p.S618L  | c.1853 | 1.675974269 | 3.255 | 1  |
| 1215 | FLT3   | ENST00000380982 | p.D835H  | c.2503 | 15.12335553 | 0     | 2  |
| 1215 | FLT3   | ENST00000380982 | p.D835Y  | c.2503 | 15.12335553 | 0     | 11 |
| 1215 | FLT3   | ENST00000380982 | p.D835E  | c.2505 | 15.12335553 | 0     | 3  |
| 1216 | PTGIS  | ENST00000244043 | p.A353D  | c.1058 | 0.128577778 | 0     | 1  |
| 1216 | PTGIS  | ENST00000244043 | p.P433S  | c.1297 | 0.102162482 | 3.542 | 1  |
| 1216 | PTGIS  | ENST00000244043 | p.M486T  | c.1457 | 0.081085417 | 4.827 | 1  |
| 1216 | PTGIS  | ENST00000244043 | p.N287D  | c.859  | 0.03818906  | 7.06  | 1  |
| 1217 | ITGA4  | ENST00000397033 | p.K116N  | c.348  | 0.076331996 | 0     | 1  |
| 1217 | ITGA4  | ENST00000397033 | p.Q185P  | c.554  | 0.019953852 | 7.003 | 1  |
| 1217 | ITGA4  | ENST00000397033 | p.D186N  | c.556  | 0.068535724 | 3.867 | 1  |
| 1218 | DUSP3  | ENST00000226004 | p.D92G   | c.275  | 0.110261421 | 0     | 1  |
| 1218 | DUSP3  | ENST00000226004 | p.R130C  | c.388  | 0.110261421 | 3.181 | 1  |
| 1219 | CTNNB1 | ENST00000349496 | p.A215T  | c.643  | 0.009420374 | 6.73  | 1  |
| 1219 | CTNNB1 | ENST00000349496 | p.T257I  | c.770  | 0.018538796 | 0     | 1  |
| 1219 | CTNNB1 | ENST00000349496 | p.K292E  | c.874  | 0.015697039 | 6.777 | 1  |
| 1220 | MTAP   | ENST00000580900 | p.C136R  | c.406  | 0.008602669 | 6.861 | 1  |
| 1220 | MTAP   | ENST00000580900 | p.C145G  | c.433  | 0.023051429 | 5.439 | 1  |
| 1220 | MTAP   | ENST00000580900 | p.K206N  | c.618  | 0.031654098 | 0     | 1  |
| 1221 | ETF1   | ENST00000360541 | p.T347I  | c.1040 | 0.010068552 | 0     | 1  |
| 1221 | ETF1   | ENST00000360541 | p.V305I  | c.913  | 0.010068552 | 6.634 | 1  |
| 1222 | BAI3   | ENST00000370598 | p.A712S  | c.2134 | 0.004842608 | 7.69  | 1  |
| 1222 | BAI3   | ENST00000370598 | p.S744R  | c.2230 | 0.160128643 | 0     | 1  |

|             |                 |         |             |             |       |   |
|-------------|-----------------|---------|-------------|-------------|-------|---|
| 1222 BAI3   | ENST00000370598 | p.S801L | c.2402      | 0.155286035 | 2.687 | 1 |
| 1223 SOD2   | ENST00000538183 | p.R123C | c.367       | 1.02335702  | 0     | 1 |
| 1223 SOD2   | ENST00000538183 | p.R123H | c.368       | 1.02335702  | 0     | 1 |
| 1223 SOD2   | ENST00000538183 | p.R156Q | c.467       | 0.046714039 | 5.42  | 1 |
| 1224 LGALS8 | ENST00000526589 | p.G120E | c.359       | 0.01924997  | 0     | 1 |
| 1224 LGALS8 | ENST00000526589 | p.N325H | c.973       | 0.01924997  | 5.699 | 1 |
| 1225 IFNG   | ENST00000229135 | p.R65I  | c.194       | 1.038154579 | 0     | 1 |
| 1225 IFNG   | ENST00000229135 | p.R65T  | c.194       | 1.038154579 | 0     | 1 |
| 1225 IFNG   | ENST00000229135 | p.S144L | c.431       | 0.092597685 | 4.712 | 1 |
| 1226 IL4R   | ENST00000543915 | p.N167I | c.500       | 0.291587342 | 2.778 | 1 |
| 1226 IL4R   | ENST00000543915 | p.S196F | c.587       | 1.145793671 | 0     | 2 |
| 1227 FARP1  | ENST00000376586 | p.E573Q | c.1717      | 0.063901783 | 3.968 | 1 |
| 1227 FARP1  | ENST00000376586 | p.R660W | c.1978      | 0.063901783 | 0     | 1 |
| 1228 HCK    | ENST00000375852 | p.C482F | c.1445      | 0.035648866 | 4.81  | 1 |
| 1228 HCK    | ENST00000375852 | p.R213Q | c.638       | 0.035648866 | 0     | 1 |
| 1229 CA3    | ENST00000285381 | p.L95F  | c.283       | 0.38440471  | 4.4   | 1 |
| 1229 CA3    | ENST00000285381 | p.G98C  | c.292       | 0.424837602 | 3.252 | 1 |
| 1229 CA3    | ENST00000285381 | p.A116V | c.347       | 0.164156543 | 7.321 | 1 |
| 1229 CA3    | ENST00000285381 | p.F159L | c.475       | 0.147736216 | 8.616 | 1 |
| 1229 CA3    | ENST00000285381 | p.R226W | c.676       | 3.161135341 | 0     | 1 |
| 1229 CA3    | ENST00000285381 | p.R226L | c.677       | 3.161135341 | 0     | 2 |
| 1229 CA3    | ENST00000285381 | p.R226Q | c.677       | 3.161135341 | 0     | 1 |
| 1230 PCNA   | ENST00000379143 | p.D86Y  | c.256       | 0.020919613 | 6.579 | 1 |
| 1230 PCNA   | ENST00000379143 | p.E109K | c.325       | 1.065856667 | 0     | 1 |
| 1230 PCNA   | ENST00000379143 | p.E109D | c.327       | 1.065856667 | 0     | 1 |
| 1230 PCNA   | ENST00000379143 | p.V167L | c.499       | 0.042542103 | 6.636 | 1 |
| 1230 PCNA   | ENST00000379143 | p.A194V | c.581       | 0.090684513 | 4.463 | 1 |
| 1231 LIG1   | ENST00000263274 | p.Q636K | c.1906      | 0.125782228 | 2.991 | 1 |
| 1231 LIG1   | ENST00000263274 | p.S850F | c.2550_2549 | 0.125782228 | 0     | 1 |
| 1232 RUVBL1 | ENST00000322623 | p.P351H | c.1052      | 0.004063673 | 0     | 1 |
| 1232 RUVBL1 | ENST00000322623 | p.E310K | c.928       | 0.004063673 | 7.943 | 1 |
| 1233 CPN1   | ENST00000370418 | p.A261V | c.782       | 0.084318908 | 3.568 | 1 |
| 1233 CPN1   | ENST00000370418 | p.A330S | c.988       | 0.084318908 | 0     | 1 |
| 1234 WARS   | ENST00000355338 | p.L158V | c.472       | 0.01268265  | 0     | 1 |
| 1234 WARS   | ENST00000355338 | p.P287S | c.859       | 0.01268265  | 6.301 | 1 |
| 1235 FBXO4  | ENST00000281623 | p.W99R  | c.295       | 0.091602902 | 0     | 1 |
| 1235 FBXO4  | ENST00000281623 | p.M140L | c.418       | 0.089714203 | 3.669 | 1 |
| 1235 FBXO4  | ENST00000281623 | p.A141T | c.421       | 0.014005951 | 6.267 | 1 |
| 1236 TAT    | ENST00000355962 | p.L343V | c.1027      | 0.019545767 | 6.677 | 1 |
| 1236 TAT    | ENST00000355962 | p.E248D | c.744       | 0.011965297 | 7.385 | 1 |
| 1236 TAT    | ENST00000355962 | p.R281C | c.841       | 1.015755532 | 0     | 1 |
| 1236 TAT    | ENST00000355962 | p.R281L | c.842       | 1.015755532 | 0     | 1 |
| 1237 MAOA   | ENST00000338702 | p.T130I | c.389       | 0.091240368 | 3.809 | 1 |
| 1237 MAOA   | ENST00000338702 | p.M155T | c.464       | 0.072893155 | 6.891 | 1 |
| 1237 MAOA   | ENST00000338702 | p.T156N | c.467       | 0.358595338 | 0     | 1 |
| 1237 MAOA   | ENST00000338702 | p.H187Q | c.561       | 0.17660326  | 2.78  | 1 |
| 1237 MAOA   | ENST00000338702 | p.V189M | c.565       | 0.225374615 | 2.908 | 1 |
| 1238 CR2    | ENST00000367057 | p.V349I | c.1045      | 0.011862573 | 0     | 1 |
| 1238 CR2    | ENST00000367057 | p.A395T | c.1183      | 0.007139308 | 7.13  | 1 |

|               |                 |          |           |             |       |   |
|---------------|-----------------|----------|-----------|-------------|-------|---|
| 1238 CR2      | ENST00000367057 | p.Q396R  | c.1187    | 0.004723264 | 7.726 | 1 |
| 1240 AKR7A3   | ENST00000361640 | p.P199S  | c.595     | 0.097940498 | 3.462 | 1 |
| 1240 AKR7A3   | ENST00000361640 | p.A201T  | c.601     | 0.017977261 | 5.923 | 1 |
| 1240 AKR7A3   | ENST00000361640 | p.T267A  | c.799     | 0.111472711 | 0     | 1 |
| 1240 AKR7A3   | ENST00000361640 | p.A302P  | c.904     | 0.003918349 | 8.424 | 1 |
| 1240 AKR7A3   | ENST00000361640 | p.A318V  | c.954_953 | 0.059888615 | 9.552 | 1 |
| 1241 RPL22    | ENST00000234875 | p.F39Y   | c.116     | 0.027513999 | 6.461 | 1 |
| 1241 RPL22    | ENST00000234875 | p.F42S   | c.125     | 0.187159557 | 3.42  | 1 |
| 1241 RPL22    | ENST00000234875 | p.I47M   | c.141     | 0.098473608 | 3.506 | 1 |
| 1241 RPL22    | ENST00000234875 | p.L56P   | c.167     | 0.003767962 | 8.052 | 1 |
| 1241 RPL22    | ENST00000234875 | p.L86P   | c.257     | 0.204458589 | 0     | 1 |
| 1241 RPL22    | ENST00000234875 | p.K88N   | c.264     | 0.020348395 | 9.996 | 1 |
| 1241 RPL22    | ENST00000234875 | p.K89T   | c.266     | 0.086300746 | 7.177 | 1 |
| 1242 CNTN1    | ENST00000551295 | p.R171C  | c.511     | 1.034868336 | 0     | 2 |
| 1242 CNTN1    | ENST00000551295 | p.G194V  | c.581     | 0.068607578 | 5.525 | 1 |
| 1242 CNTN1    | ENST00000551295 | p.K220R  | c.659     | 0.17368476  | 7.713 | 1 |
| 1242 CNTN1    | ENST00000551295 | p.V222M  | c.664     | 0.092527689 | 6.898 | 1 |
| 1243 C19orf40 | ENST00000588258 | p.L59I   | c.175     | 0.028874735 | 9.345 | 1 |
| 1243 C19orf40 | ENST00000588258 | p.E63K   | c.187     | 0.323327628 | 0     | 1 |
| 1243 C19orf40 | ENST00000588258 | p.V91I   | c.271     | 0.09852379  | 4.152 | 1 |
| 1243 C19orf40 | ENST00000588258 | p.E92Q   | c.274     | 0.280476442 | 1.913 | 1 |
| 1244 CYP2C9   | ENST00000260682 | p.E122K  | c.364     | 0.088118506 | 6.915 | 1 |
| 1244 CYP2C9   | ENST00000260682 | p.P279S  | c.835     | 1.008286623 | 0     | 1 |
| 1244 CYP2C9   | ENST00000260682 | p.P279L  | c.836     | 1.008286623 | 0     | 1 |
| 1245 CD180    | ENST00000256447 | p.E367D  | c.1101    | 0.005055256 | 7.628 | 1 |
| 1245 CD180    | ENST00000256447 | p.S396F  | c.1187    | 0.076451897 | 0     | 1 |
| 1245 CD180    | ENST00000256447 | p.Q421H  | c.1263    | 0.07139664  | 3.808 | 1 |
| 1246 THBS1    | ENST00000260356 | p.R1091C | c.3271    | 0.136786713 | 2.87  | 1 |
| 1246 THBS1    | ENST00000260356 | p.D1140N | c.3418    | 0.136786713 | 0     | 1 |
| 1247 PFKM     | ENST00000340802 | p.R169Q  | c.506     | 0.02245219  | 5.477 | 1 |
| 1247 PFKM     | ENST00000340802 | p.L210I  | c.628     | 0.02245219  | 0     | 1 |
| 1248 NCKAP1   | ENST00000360982 | p.K373R  | c.1118    | 0.054674048 | 0     | 1 |
| 1248 NCKAP1   | ENST00000360982 | p.A249T  | c.745     | 0.054674048 | 4.193 | 1 |
| 1249 TP73     | ENST00000378295 | p.P116T  | c.346     | 0.011500019 | 6.578 | 1 |
| 1249 TP73     | ENST00000378295 | p.T188I  | c.563     | 0.109153795 | 0     | 1 |
| 1249 TP73     | ENST00000378295 | p.E218K  | c.652     | 0.099719696 | 3.341 | 1 |
| 1250 CAPN2    | ENST00000295006 | p.E435D  | c.1305    | 0.039172907 | 0     | 1 |
| 1250 CAPN2    | ENST00000295006 | p.P478L  | c.1433    | 0.039172907 | 4.674 | 1 |
| 1251 FABP1    | ENST00000295834 | p.G76E   | c.227     | 0.049910417 | 0     | 1 |
| 1251 FABP1    | ENST00000295834 | p.I98T   | c.293     | 0.027223569 | 5.199 | 1 |
| 1251 FABP1    | ENST00000295834 | p.L24M   | c.70      | 0.022686848 | 5.462 | 1 |
| 1252 BCHE     | ENST00000264381 | p.Y360H  | c.1078    | 0.145841363 | 6.981 | 1 |
| 1252 BCHE     | ENST00000264381 | p.P457L  | c.1370    | 0.330471774 | 2.506 | 1 |
| 1252 BCHE     | ENST00000264381 | p.W458L  | c.1373    | 0.383321896 | 3.343 | 1 |
| 1252 BCHE     | ENST00000264381 | p.Y468C  | c.1403    | 0.330703815 | 3.046 | 1 |
| 1252 BCHE     | ENST00000264381 | p.I470S  | c.1409    | 0.01874901  | 6.218 | 1 |
| 1252 BCHE     | ENST00000264381 | p.D482E  | c.1446    | 0.049658548 | 8.945 | 1 |
| 1252 BCHE     | ENST00000264381 | p.G106V  | c.317     | 0.459786882 | 5.752 | 1 |
| 1252 BCHE     | ENST00000264381 | p.E108Q  | c.322     | 0.036667898 | 9.457 | 1 |

|              |                 |         |           |             |       |   |
|--------------|-----------------|---------|-----------|-------------|-------|---|
| 1252 BCHE    | ENST00000264381 | p.M109I | c.327     | 0.481627662 | 0     | 1 |
| 1252 BCHE    | ENST00000264381 | p.H154Y | c.460     | 0.124700827 | 4.553 | 1 |
| 1253 PLAT    | ENST00000220809 | p.L341M | c.1021    | 0.080960535 | 3.727 | 1 |
| 1253 PLAT    | ENST00000220809 | p.K413E | c.1237    | 0.149301191 | 0     | 1 |
| 1253 PLAT    | ENST00000220809 | p.E453A | c.1358    | 0.098563905 | 9.168 | 1 |
| 1253 PLAT    | ENST00000220809 | p.H322Y | c.964     | 0.103368204 | 3.795 | 1 |
| 1254 CTNNB1  | ENST00000349496 | p.R587Q | c.1760    | 0.158707464 | 6.554 | 1 |
| 1254 CTNNB1  | ENST00000349496 | p.C619Y | c.1856    | 1.012050775 | 0     | 2 |
| 1254 CTNNB1  | ENST00000349496 | p.Q623E | c.1867    | 0.173760419 | 9.472 | 1 |
| 1255 POT1    | ENST00000357628 | p.C59S  | c.175     | 0.110414381 | 3.179 | 1 |
| 1255 POT1    | ENST00000357628 | p.G95C  | c.283     | 0.110414381 | 0     | 1 |
| 1256 TAT     | ENST00000355962 | p.E92D  | c.276     | 0.088021514 | 3.506 | 1 |
| 1256 TAT     | ENST00000355962 | p.A96T  | c.286     | 0.009752582 | 6.68  | 1 |
| 1256 TAT     | ENST00000355962 | p.R333H | c.998     | 0.097774097 | 0     | 1 |
| 1257 PRLR    | ENST00000382002 | p.E169K | c.505     | 0.195262549 | 2.582 | 1 |
| 1257 PRLR    | ENST00000382002 | p.I170T | c.509     | 0.289453463 | 3.392 | 1 |
| 1257 PRLR    | ENST00000382002 | p.W180G | c.538     | 0.015113888 | 6.384 | 1 |
| 1257 PRLR    | ENST00000382002 | p.F191C | c.572     | 0.204363753 | 5.889 | 1 |
| 1257 PRLR    | ENST00000382002 | p.W218G | c.652     | 0.291116539 | 0     | 1 |
| 1258 POLI    | ENST00000579534 | p.R382L | c.1145    | 0.049755506 | 0     | 1 |
| 1258 POLI    | ENST00000579534 | p.L275F | c.823     | 0.049755506 | 4.329 | 1 |
| 1259 PCK1    | ENST00000319441 | p.A336T | c.1006    | 0.168882457 | 0     | 1 |
| 1259 PCK1    | ENST00000319441 | p.F357S | c.1070    | 0.08581583  | 5.228 | 1 |
| 1259 PCK1    | ENST00000319441 | p.S404L | c.1211    | 0.152082525 | 2.814 | 1 |
| 1260 IL20    | ENST00000367098 | p.R43Q  | c.128     | 2.130325653 | 0     | 3 |
| 1260 IL20    | ENST00000367098 | p.L168R | c.503     | 0.029183602 | 6.81  | 1 |
| 1260 IL20    | ENST00000367098 | p.E173D | c.519     | 0.366831574 | 3.042 | 1 |
| 1262 PTGR1   | ENST00000309195 | p.F43L  | c.127     | 0.044687031 | 4.484 | 1 |
| 1262 PTGR1   | ENST00000309195 | p.Q66H  | c.198     | 0.055851048 | 0     | 1 |
| 1262 PTGR1   | ENST00000309195 | p.G120W | c.358     | 0.033998801 | 6.485 | 1 |
| 1263 TLR4    | ENST00000355622 | p.T413S | c.1238    | 0.149721491 | 6.972 | 1 |
| 1263 TLR4    | ENST00000355622 | p.S415I | c.1244    | 0.222694562 | 7.259 | 1 |
| 1263 TLR4    | ENST00000355622 | p.E439K | c.1315    | 1.014494255 | 0     | 1 |
| 1263 TLR4    | ENST00000355622 | p.E439A | c.1316    | 1.014494255 | 0     | 1 |
| 1264 PTPRM   | ENST00000400060 | p.R394W | c.1180    | 0.021687386 | 0     | 1 |
| 1264 PTPRM   | ENST00000400060 | p.D478Y | c.1432    | 0.021687386 | 5.527 | 1 |
| 1265 CYTH2   | ENST00000427476 | p.V204I | c.610     | 0.051744496 | 4.404 | 1 |
| 1265 CYTH2   | ENST00000427476 | p.R205W | c.612_613 | 0.060992796 | 4.155 | 1 |
| 1265 CYTH2   | ENST00000427476 | p.G209S | c.625     | 0.043402273 | 4.668 | 1 |
| 1265 CYTH2   | ENST00000427476 | p.R239Q | c.716     | 0.142704433 | 0     | 1 |
| 1266 ARFGEF1 | ENST00000262215 | p.L817I | c.2449    | 0.019209982 | 5.702 | 1 |
| 1266 ARFGEF1 | ENST00000262215 | p.D864Y | c.2590    | 0.019209982 | 0     | 1 |
| 1267 DDC     | ENST00000444124 | p.M93V  | c.277     | 0.01307541  | 6.257 | 1 |
| 1267 DDC     | ENST00000444124 | p.E12D  | c.36      | 0.01307541  | 0     | 1 |
| 1269 AGT     | ENST00000366667 | p.A150S | c.448     | 0.022319421 | 7.981 | 1 |
| 1269 AGT     | ENST00000366667 | p.A177E | c.530     | 2.007540082 | 0     | 1 |
| 1269 AGT     | ENST00000366667 | p.A177V | c.530     | 2.007540082 | 0     | 2 |
| 1269 AGT     | ENST00000366667 | p.F223L | c.667     | 0.027679505 | 8.125 | 1 |
| 1270 GBA     | ENST00000327247 | p.R41C  | c.121     | 0.008850655 | 6.82  | 1 |

|      |          |                 |                    |             |             |       |   |
|------|----------|-----------------|--------------------|-------------|-------------|-------|---|
| 1270 | GBA      | ENST00000327247 | p.F456Y            | c.1367      | 0.013193764 | 6.244 | 1 |
| 1270 | GBA      | ENST00000327247 | p.K145R            | c.434       | 0.053164724 | 0     | 1 |
| 1270 | GBA      | ENST00000327247 | p.Q265H            | c.795       | 0.031120305 | 5.006 | 1 |
| 1271 | HEXB     | ENST00000261416 | p.477in_frame_1nsK | c.1423_1424 | 0.15006074  | 2.79  | 1 |
| 1271 | HEXB     | ENST00000261416 | p.Y78D             | c.232       | 0.043339487 | 4.723 | 1 |
| 1271 | HEXB     | ENST00000261416 | p.H102Y            | c.304       | 0.182450794 | 0     | 1 |
| 1272 | MSH2     | ENST00000233146 | p.R383L            | c.1148      | 0.097253817 | 9.505 | 1 |
| 1272 | MSH2     | ENST00000233146 | p.R406Q            | c.1217      | 0.028459599 | 7.239 | 1 |
| 1272 | MSH2     | ENST00000233146 | p.G410S            | c.1228      | 0.097407287 | 5.779 | 1 |
| 1272 | MSH2     | ENST00000233146 | p.N412H            | c.1234      | 0.116793944 | 3.124 | 1 |
| 1272 | MSH2     | ENST00000233146 | p.Q451E            | c.1351      | 0.140912641 | 0     | 1 |
| 1273 | SERPINC1 | ENST00000367698 | p.G360S            | c.1078      | 0.168687434 | 0     | 1 |
| 1273 | SERPINC1 | ENST00000367698 | p.H401N            | c.1201      | 0.164451942 | 2.76  | 1 |
| 1273 | SERPINC1 | ENST00000367698 | p.A118T            | c.352       | 0.009034435 | 9.749 | 1 |
| 1273 | SERPINC1 | ENST00000367698 | p.D232N            | c.694       | 0.028856775 | 5.651 | 1 |
| 1274 | PTK2B    | ENST00000544172 | p.G905S            | c.2713      | 0.039118639 | 4.676 | 1 |
| 1274 | PTK2B    | ENST00000544172 | p.M957I            | c.2871      | 0.039118639 | 0     | 1 |
| 1275 | NAT2     | ENST00000286479 | p.R9I              | c.26        | 2.017840164 | 0     | 2 |
| 1275 | NAT2     | ENST00000286479 | p.R9K              | c.26        | 2.017840164 | 0     | 1 |
| 1275 | NAT2     | ENST00000286479 | p.L225S            | c.674       | 0.102531316 | 6.892 | 1 |
| 1275 | NAT2     | ENST00000286479 | p.R33Q             | c.98        | 0.132871366 | 6.73  | 1 |
| 1276 | TUBGCP4  | ENST00000260383 | p.Q370K            | c.1108      | 0.017384852 | 7.933 | 1 |
| 1276 | TUBGCP4  | ENST00000260383 | p.G449C            | c.1345      | 1.11096721  | 0     | 1 |
| 1276 | TUBGCP4  | ENST00000260383 | p.G449R            | c.1345      | 1.11096721  | 0     | 1 |
| 1276 | TUBGCP4  | ENST00000260383 | p.R486C            | c.1456      | 0.217392679 | 3.226 | 1 |
| 1277 | ADAMTS4  | ENST00000367996 | p.Q354K            | c.1060      | 0.062730005 | 0     | 1 |
| 1277 | ADAMTS4  | ENST00000367996 | p.R447C            | c.1339      | 0.003170662 | 8.301 | 1 |
| 1277 | ADAMTS4  | ENST00000367996 | p.H486Q            | c.1458      | 0.012383907 | 6.719 | 1 |
| 1277 | ADAMTS4  | ENST00000367996 | p.P488S            | c.1462      | 0.050066867 | 4.32  | 1 |
| 1278 | RNF41    | ENST00000552656 | p.H251Q            | c.753       | 0.013936383 | 0     | 1 |
| 1278 | RNF41    | ENST00000552656 | p.L306R            | c.917       | 0.013936383 | 6.165 | 1 |
| 1279 | CHN1     | ENST00000409900 | p.Y70N             | c.208       | 0.050625217 | 0     | 1 |
| 1279 | CHN1     | ENST00000409900 | p.H114Q            | c.342       | 0.050625217 | 4.304 | 1 |
| 1280 | AHCY     | ENST00000217426 | p.K426N            | c.1278      | 0.009252122 | 6.756 | 1 |
| 1280 | AHCY     | ENST00000217426 | p.P246H            | c.737       | 0.009252122 | 0     | 1 |
| 1281 | KDM1B    | ENST00000388870 | p.W422L            | c.1265      | 0.010110513 | 6.628 | 1 |
| 1281 | KDM1B    | ENST00000388870 | p.R757W            | c.2269      | 0.010110513 | 0     | 1 |
| 1282 | DPYSL5   | ENST00000288699 | p.V484A            | c.1451      | 0.00983404  | 0     | 1 |
| 1282 | DPYSL5   | ENST00000288699 | p.E217K            | c.649       | 0.00983404  | 6.668 | 1 |
| 1283 | SET      | ENST00000372692 | p.Y73C             | c.218       | 0.00875911  | 0     | 1 |
| 1283 | SET      | ENST00000372692 | p.A31V             | c.92        | 0.00875911  | 6.835 | 1 |
| 1284 | ENPEP    | ENST00000265162 | p.V97I             | c.289       | 1.014170161 | 0     | 2 |
| 1284 | ENPEP    | ENST00000265162 | p.A127T            | c.379       | 0.028340323 | 6.141 | 1 |
| 1285 | PTK2     | ENST00000519419 | p.S91N             | c.272       | 0.008807816 | 6.827 | 1 |
| 1285 | PTK2     | ENST00000519419 | p.R249Q            | c.746       | 0.008807816 | 0     | 1 |
| 1286 | ZC3H12A  | ENST00000373087 | p.D141H            | c.421       | 0.078509841 | 0     | 1 |
| 1286 | ZC3H12A  | ENST00000373087 | p.D226N            | c.676       | 0.06345932  | 4.001 | 1 |
| 1286 | ZC3H12A  | ENST00000373087 | p.N243K            | c.729       | 0.017055774 | 5.961 | 1 |
| 1287 | DUSP26   | ENST00000256261 | p.E64K             | c.190       | 0.029122291 | 9.713 | 1 |

|                |                 |         |        |             |       |   |
|----------------|-----------------|---------|--------|-------------|-------|---|
| 1287 DUSP26    | ENST00000256261 | p.L69F  | c.205  | 0.122414019 | 0     | 1 |
| 1287 DUSP26    | ENST00000256261 | p.K147N | c.441  | 0.073941412 | 4.551 | 1 |
| 1287 DUSP26    | ENST00000256261 | p.L167F | c.499  | 0.081914783 | 3.67  | 1 |
| 1288 VAV3      | ENST00000527011 | p.R38P  | c.113  | 0.308142502 | 0     | 1 |
| 1288 VAV3      | ENST00000527011 | p.I75R  | c.224  | 0.195706284 | 2.537 | 1 |
| 1288 VAV3      | ENST00000527011 | p.V102F | c.304  | 0.159247497 | 2.88  | 1 |
| 1289 SYK       | ENST00000375754 | p.K527N | c.1581 | 0.054522669 | 5.197 | 1 |
| 1289 SYK       | ENST00000375754 | p.G578E | c.1733 | 1.027261335 | 0     | 2 |
| 1290 TPBG      | ENST00000369750 | p.V297I | c.889  | 0.035648866 | 0     | 1 |
| 1290 TPBG      | ENST00000369750 | p.P326L | c.977  | 0.035648866 | 4.81  | 1 |
| 1291 IL1R2     | ENST00000332549 | p.D90N  | c.268  | 1.058801632 | 5.088 | 1 |
| 1291 IL1R2     | ENST00000332549 | p.D90Y  | c.268  | 1.058801632 | 5.088 | 1 |
| 1291 IL1R2     | ENST00000332549 | p.A92S  | c.274  | 0.010093615 | 8.179 | 1 |
| 1291 IL1R2     | ENST00000332549 | p.R160C | c.478  | 1.062252081 | 0     | 1 |
| 1291 IL1R2     | ENST00000332549 | p.R160H | c.479  | 1.062252081 | 0     | 1 |
| 1292 KLK5      | ENST00000391809 | p.L123M | c.367  | 1.175248879 | 0     | 1 |
| 1292 KLK5      | ENST00000391809 | p.L123Q | c.368  | 1.175248879 | 0     | 1 |
| 1292 KLK5      | ENST00000391809 | p.L204I | c.610  | 0.219898393 | 3.234 | 1 |
| 1292 KLK5      | ENST00000391809 | p.Q205H | c.615  | 0.145259071 | 3.858 | 1 |
| 1293 SERPINA12 | ENST00000556881 | p.A45V  | c.134  | 0.007457977 | 7.067 | 1 |
| 1293 SERPINA12 | ENST00000556881 | p.L112I | c.334  | 0.007457977 | 0     | 1 |
| 1294 CFH       | ENST00000367429 | p.G89A  | c.266  | 0.05916357  | 5.172 | 1 |
| 1294 CFH       | ENST00000367429 | p.T91N  | c.272  | 0.298491757 | 2.911 | 1 |
| 1294 CFH       | ENST00000367429 | p.N115Y | c.343  | 0.036579337 | 8.024 | 1 |
| 1294 CFH       | ENST00000367429 | p.P139S | c.415  | 1.164533743 | 0     | 1 |
| 1294 CFH       | ENST00000367429 | p.P139H | c.416  | 1.164533743 | 0     | 1 |
| 1295 CNOT6L    | ENST00000264903 | p.V356L | c.1066 | 0.188772955 | 7.244 | 1 |
| 1295 CNOT6L    | ENST00000264903 | p.A357T | c.1069 | 1.066884268 | 0     | 2 |
| 1295 CNOT6L    | ENST00000264903 | p.A329T | c.985  | 0.237237659 | 4.052 | 1 |
| 1296 RECQL     | ENST00000421138 | p.E108D | c.324  | 0.228763145 | 3.874 | 1 |
| 1296 RECQL     | ENST00000421138 | p.R215G | c.643  | 0.207266571 | 4.113 | 1 |
| 1296 RECQL     | ENST00000421138 | p.A248T | c.742  | 2.1273267   | 0     | 3 |
| 1296 RECQL     | ENST00000421138 | p.I251N | c.752  | 0.039094185 | 9.553 | 1 |
| 1297 ADAR      | ENST00000292205 | p.I186F | c.556  | 0.033446522 | 4.902 | 1 |
| 1297 ADAR      | ENST00000292205 | p.N216S | c.647  | 0.033446522 | 0     | 1 |
| 1298 OXCT1     | ENST00000196371 | p.D428Y | c.1282 | 0.088862735 | 3.745 | 1 |
| 1298 OXCT1     | ENST00000196371 | p.G62V  | c.185  | 0.042055771 | 8.385 | 1 |
| 1298 OXCT1     | ENST00000196371 | p.Q138L | c.413  | 0.154148891 | 0     | 1 |
| 1298 OXCT1     | ENST00000196371 | p.F230L | c.690  | 0.121349692 | 3.707 | 1 |
| 1299 CFH       | ENST00000367429 | p.G350E | c.1049 | 0.261011439 | 0     | 1 |
| 1299 CFH       | ENST00000367429 | p.H373Y | c.1117 | 0.133019753 | 3.347 | 1 |
| 1299 CFH       | ENST00000367429 | p.C374G | c.1120 | 0.176683862 | 2.636 | 1 |
| 1299 CFH       | ENST00000367429 | p.G397R | c.1189 | 0.020793006 | 9.07  | 1 |
| 1300 P2RY1     | ENST00000305097 | p.H132R | c.395  | 0.044229128 | 5.1   | 1 |
| 1300 P2RY1     | ENST00000305097 | p.S138N | c.413  | 0.023486898 | 5.412 | 1 |
| 1300 P2RY1     | ENST00000305097 | p.V179A | c.536  | 0.052644179 | 0     | 1 |
| 1301 TRIM63    | ENST00000374272 | p.C134S | c.401  | 0.072795849 | 0     | 1 |
| 1301 TRIM63    | ENST00000374272 | p.A157S | c.469  | 0.072795849 | 3.78  | 1 |
| 1302 FGFR2     | ENST00000457416 | p.G691R | c.2071 | 0.023864336 | 5.389 | 1 |



|      |          |                 |                     |             |             |       |   |
|------|----------|-----------------|---------------------|-------------|-------------|-------|---|
| 1302 | FGFR2    | ENST00000457416 | p.E696K             | c.2086      | 0.015292838 | 6.031 | 1 |
| 1302 | FGFR2    | ENST00000457416 | p.M723I             | c.2169      | 0.039157174 | 0     | 1 |
| 1303 | CR2      | ENST00000367057 | p.D69Y              | c.205       | 0.043737058 | 4.515 | 1 |
| 1303 | CR2      | ENST00000367057 | p.D72N              | c.214       | 0.009827226 | 6.669 | 1 |
| 1303 | CR2      | ENST00000367057 | p.P80S              | c.238       | 0.039123738 | 6.329 | 1 |
| 1303 | CR2      | ENST00000367057 | p.P27L              | c.80        | 0.066003161 | 0     | 1 |
| 1304 | RASEF    | ENST00000376447 | p.L620M             | c.1858      | 0.022343515 | 0     | 1 |
| 1304 | RASEF    | ENST00000376447 | p.G653E             | c.1958      | 0.022343515 | 5.484 | 1 |
| 1305 | TBC1D22A | ENST00000337137 | p.H406Y             | c.1216      | 0.127411312 | 7.298 | 1 |
| 1305 | TBC1D22A | ENST00000337137 | p.L407V             | c.1219      | 0.043521143 | 6.717 | 1 |
| 1305 | TBC1D22A | ENST00000337137 | p.E411K             | c.1231      | 0.341947765 | 3.177 | 1 |
| 1305 | TBC1D22A | ENST00000337137 | p.F474C             | c.1421_1422 | 0.161385501 | 6.243 | 1 |
| 1305 | TBC1D22A | ENST00000337137 | p.R286H             | c.857       | 1.139630635 | 0     | 2 |
| 1306 | HSPB11   | ENST00000371378 | p.L8Q               | c.23        | 0.177144675 | 3.497 | 1 |
| 1307 | FLNB     | ENST00000490882 | p.D1126N            | c.3376      | 0.256967544 | 1.991 | 1 |
| 1307 | FLNB     | ENST00000490882 | p.G1146E            | c.3437      | 0.026881037 | 5.541 | 1 |
| 1307 | FLNB     | ENST00000490882 | p.E1169K            | c.3505      | 0.273042404 | 0     | 1 |
| 1308 | CBL      | ENST00000264033 | p.E143D             | c.429       | 0.0206992   | 5.812 | 1 |
| 1308 | CBL      | ENST00000264033 | p.R149Q             | c.446       | 0.165792854 | 2.618 | 1 |
| 1308 | CBL      | ENST00000264033 | p.E276K             | c.826       | 0.180693134 | 0     | 1 |
| 1309 | CLEC4C   | ENST00000542353 | p.R136I             | c.407       | 1.126152656 | 0     | 1 |
| 1309 | CLEC4C   | ENST00000542353 | p.R136K             | c.407       | 1.126152656 | 0     | 1 |
| 1309 | CLEC4C   | ENST00000542353 | p.S138Y             | c.413       | 1.063997641 | 7.657 | 2 |
| 1309 | CLEC4C   | ENST00000542353 | p.R186C             | c.556       | 0.041574797 | 6.08  | 1 |
| 1309 | CLEC4C   | ENST00000542353 | p.FR185in_frame_del | c.559_554   | 0.302088195 | 3.301 | 1 |
| 1310 | UPF2     | ENST00000357604 | p.H366Y             | c.1096      | 0.113764585 | 9.126 | 1 |
| 1310 | UPF2     | ENST00000357604 | p.R369G             | c.1105      | 1.018033211 | 0     | 2 |
| 1310 | UPF2     | ENST00000357604 | p.H302N             | c.904_903   | 0.142671877 | 5.944 | 1 |
| 1311 | APAF1    | ENST0000051964  | p.L639F             | c.1917      | 0.078726874 | 0     | 1 |
| 1311 | APAF1    | ENST0000051964  | p.I672V             | c.2014      | 0.078726874 | 3.667 | 1 |
| 1312 | DCUN1D3  | ENST00000563934 | p.L128M             | c.382       | 0.007149212 | 7.128 | 1 |
| 1312 | DCUN1D3  | ENST00000563934 | p.Y183H             | c.547       | 0.111755735 | 0     | 1 |
| 1312 | DCUN1D3  | ENST00000563934 | p.T242S             | c.724       | 0.028432301 | 5.245 | 1 |
| 1312 | DCUN1D3  | ENST00000563934 | p.L247F             | c.739       | 0.092610553 | 3.676 | 1 |
| 1313 | RPL15    | ENST00000415719 | p.R44Q              | c.131       | 0.012456384 | 6.741 | 1 |
| 1313 | RPL15    | ENST00000415719 | p.R49G              | c.145       | 0.017581516 | 5.976 | 1 |
| 1313 | RPL15    | ENST00000415719 | p.Q8R               | c.23        | 0.025235924 | 0     | 1 |
| 1314 | BIN2     | ENST00000267012 | p.S78L              | c.233       | 0.010152649 | 6.622 | 1 |
| 1314 | BIN2     | ENST00000267012 | p.V103I             | c.307       | 0.010152649 | 0     | 1 |
| 1316 | ALB      | ENST00000295897 | p.D348N             | c.1042      | 0.027041763 | 6.178 | 1 |
| 1316 | ALB      | ENST00000295897 | p.Y54F              | c.161       | 0.016470178 | 5.924 | 1 |
| 1316 | ALB      | ENST00000295897 | p.E124D             | c.372       | 0.041453304 | 0     | 1 |
| 1316 | ALB      | ENST00000295897 | p.Q228K             | c.682       | 0.011171758 | 6.484 | 1 |
| 1317 | NSD1     | ENST00000439151 | p.R1984L            | c.5951      | 0.140048652 | 2.836 | 1 |
| 1317 | NSD1     | ENST00000439151 | p.D2008N            | c.6022      | 0.140048652 | 0     | 1 |
| 1318 | ENPEP    | ENST00000265162 | p.G476V             | c.1427      | 0.025626401 | 8.662 | 1 |
| 1318 | ENPEP    | ENST00000265162 | p.R855Q             | c.2564      | 1.121796383 | 0     | 2 |
| 1318 | ENPEP    | ENST00000265162 | p.R891Q             | c.2672      | 0.259344143 | 3.067 | 1 |
| 1319 | PRMT6    | ENST00000370078 | p.R351P             | c.1052      | 0.050450067 | 0     | 1 |

|              |                 |          |           |             |       |   |
|--------------|-----------------|----------|-----------|-------------|-------|---|
| 1319 PRMT6   | ENST00000370078 | p.L162M  | c.484     | 0.050450067 | 4.309 | 1 |
| 1320 A2M     | ENST00000318602 | p.R147C  | c.439     | 2.019359185 | 0     | 1 |
| 1320 A2M     | ENST00000318602 | p.R147H  | c.440     | 2.019359185 | 0     | 2 |
| 1320 A2M     | ENST00000318602 | p.S191Y  | c.572     | 0.146195465 | 7.31  | 1 |
| 1320 A2M     | ENST00000318602 | p.V207L  | c.619     | 0.050436958 | 6.259 | 1 |
| 1321 GDNF    | ENST00000427982 | p.L137V  | c.409     | 0.110457884 | 0     | 1 |
| 1321 GDNF    | ENST00000427982 | p.G164S  | c.490     | 0.005197379 | 7.588 | 1 |
| 1321 GDNF    | ENST00000427982 | p.S221Y  | c.662     | 0.013426821 | 6.347 | 1 |
| 1321 GDNF    | ENST00000427982 | p.A222T  | c.664     | 0.094118036 | 3.427 | 1 |
| 1322 C8A     | ENST00000361249 | p.E352K  | c.1054    | 0.164104607 | 8.794 | 1 |
| 1322 C8A     | ENST00000361249 | p.S421Y  | c.1262    | 0.201219415 | 5.893 | 1 |
| 1322 C8A     | ENST00000361249 | p.E278K  | c.832     | 2.019080814 | 0     | 3 |
| 1323 LRRC4   | ENST00000249363 | p.R96C   | c.286     | 1.095193046 | 0     | 1 |
| 1323 LRRC4   | ENST00000249363 | p.R96H   | c.287     | 1.095193046 | 0     | 1 |
| 1323 LRRC4   | ENST00000249363 | p.G121S  | c.361     | 0.190386092 | 3.393 | 1 |
| 1324 CHID1   | ENST00000323541 | p.Y114C  | c.341     | 0.047728672 | 4.389 | 1 |
| 1324 CHID1   | ENST00000323541 | p.T154M  | c.461     | 0.01544607  | 6.967 | 1 |
| 1324 CHID1   | ENST00000323541 | p.R179W  | c.535     | 0.055721933 | 0     | 1 |
| 1325 GNE     | ENST00000539815 | p.Y590D  | c.1768    | 0.045358916 | 4.685 | 1 |
| 1325 GNE     | ENST00000539815 | p.A591T  | c.1771    | 0.173261448 | 2.584 | 1 |
| 1325 GNE     | ENST00000539815 | p.Y675C  | c.2024    | 0.20565326  | 0     | 1 |
| 1326 ALDH5A1 | ENST00000348925 | p.A198P  | c.592     | 1.294445933 | 0     | 1 |
| 1326 ALDH5A1 | ENST00000348925 | p.A198S  | c.592     | 1.294445933 | 0     | 1 |
| 1326 ALDH5A1 | ENST00000348925 | p.T224I  | c.671     | 0.307440431 | 2.807 | 1 |
| 1326 ALDH5A1 | ENST00000348925 | p.V226L  | c.676     | 0.267484529 | 3.021 | 1 |
| 1326 ALDH5A1 | ENST00000348925 | p.S294F  | c.881     | 0.064266138 | 5.14  | 1 |
| 1327 VAT1L   | ENST00000302536 | p.I92T   | c.275     | 0.00541809  | 7.528 | 1 |
| 1327 VAT1L   | ENST00000302536 | p.D93G   | c.278     | 0.033261568 | 4.91  | 1 |
| 1327 VAT1L   | ENST00000302536 | p.G326D  | c.977     | 0.038679658 | 0     | 1 |
| 1328 MNDA    | ENST00000368141 | p.L65R   | c.194     | 0.387474288 | 0     | 1 |
| 1328 MNDA    | ENST00000368141 | p.L9I    | c.25      | 0.256183835 | 2.189 | 1 |
| 1328 MNDA    | ENST00000368141 | p.G13E   | c.38      | 0.205051349 | 2.572 | 1 |
| 1329 PON1    | ENST00000542556 | p.H348Y  | c.1042    | 0.052775055 | 0     | 1 |
| 1329 PON1    | ENST00000542556 | p.I226F  | c.676     | 0.052775055 | 4.244 | 1 |
| 1330 CRYGC   | ENST00000282141 | p.E120K  | c.358     | 0.055552668 | 4.17  | 1 |
| 1330 CRYGC   | ENST00000282141 | p.R153W  | c.457     | 0.055552668 | 0     | 1 |
| 1331 CFB     | ENST00000556679 | p.P572R  | c.1715    | 0.017738158 | 0     | 1 |
| 1331 CFB     | ENST00000556679 | p.K593N  | c.1779    | 0.017738158 | 5.817 | 1 |
| 1332 UGT2B7  | ENST00000305231 | p.P344L  | c.1031    | 0.013965393 | 0     | 1 |
| 1332 UGT2B7  | ENST00000305231 | p.E318K  | c.952     | 0.013965393 | 6.162 | 1 |
| 1333 IL6R    | ENST00000368485 | p.S141F  | c.422_423 | 0.005104552 | 7.614 | 1 |
| 1333 IL6R    | ENST00000368485 | p.G199W  | c.595     | 0.005104552 | 0     | 1 |
| 1334 ADH7    | ENST00000476959 | p.V57G   | c.170     | 0.131430818 | 4.124 | 1 |
| 1334 ADH7    | ENST00000476959 | p.R58C   | c.172     | 1.14267347  | 3.85  | 2 |
| 1334 ADH7    | ENST00000476959 | p.R149K  | c.446     | 1.196048677 | 0     | 2 |
| 1335 FCN2    | ENST00000291744 | p.G139R  | c.415     | 1.010005936 | 0     | 2 |
| 1335 FCN2    | ENST00000291744 | p.R192L  | c.575     | 0.026677702 | 6.643 | 1 |
| 1336 SETD2   | ENST00000409792 | p.C1516F | c.4547    | 0.254478412 | 7.291 | 1 |
| 1336 SETD2   | ENST00000409792 | p.R1523C | c.4567    | 1.166719732 | 3.769 | 1 |

|      |        |                 |                                 |             |             |       |   |
|------|--------|-----------------|---------------------------------|-------------|-------------|-------|---|
| 1336 | SETD2  | ENST00000409792 | p.R1523H                        | c.4568      | 1.166719732 | 3.769 | 1 |
| 1336 | SETD2  | ENST00000409792 | p.E1528D                        | c.4584      | 0.176901906 | 3.728 | 1 |
| 1336 | SETD2  | ENST00000409792 | p.N1541S                        | c.4622      | 1.290947196 | 3.341 | 2 |
| 1336 | SETD2  | ENST00000409792 | p.W1640R                        | c.4918      | 1.425932463 | 0     | 1 |
| 1336 | SETD2  | ENST00000409792 | p.W1640C                        | c.4920      | 1.425932463 | 0     | 1 |
| 1337 | FGF9   | ENST00000382353 | p.G103S                         | c.307       | 0.091188772 | 3.455 | 1 |
| 1337 | FGF9   | ENST00000382353 | p.R137I                         | c.410       | 0.091188772 | 0     | 1 |
| 1338 | IL2RG  | ENST00000374202 | p.Y89F                          | c.266       | 0.022374512 | 0     | 1 |
| 1338 | IL2RG  | ENST00000374202 | p.Q144H                         | c.432       | 0.022374512 | 5.482 | 1 |
| 1339 | SNX33  | ENST00000308527 | p.K382N                         | c.1146      | 0.030955434 | 0     | 1 |
| 1339 | SNX33  | ENST00000308527 | p.M430I                         | c.1290      | 0.006555857 | 7.253 | 1 |
| 1339 | SNX33  | ENST00000308527 | p.K490N                         | c.1470      | 0.024399578 | 5.357 | 1 |
| 1340 | RPL3   | ENST00000216146 | p.A51V                          | c.152       | 0.051907477 | 0     | 1 |
| 1340 | RPL3   | ENST00000216146 | p.P172T                         | c.514       | 0.006099714 | 7.692 | 1 |
| 1340 | RPL3   | ENST00000216146 | p.V321D                         | c.962       | 0.048335391 | 4.409 | 1 |
| 1341 | CAPN3  | ENST00000397163 | p.A726V                         | c.2177      | 0.006429846 | 7.281 | 1 |
| 1341 | CAPN3  | ENST00000397163 | p.D753N                         | c.2257      | 0.006429846 | 0     | 1 |
| 1342 | FLT3   | ENST00000380982 | p.594in_frame_insSPEDNEYFYVD    | c.1781_1780 | 2.005403088 | 0     | 1 |
| 1342 | FLT3   | ENST00000380982 | p.594in_frame_insGTGSSDNEYFYVDF | c.1783_1782 | 2.005403088 | 0     | 1 |
| 1342 | FLT3   | ENST00000380982 | p.594in_frame_insSDNEYFYVDF     | c.1783_1782 | 2.005403088 | 0     | 1 |
| 1342 | FLT3   | ENST00000380982 | p.S127F                         | c.380       | 0.016209265 | 7.532 | 1 |
| 1344 | GRM5   | ENST00000305447 | p.P346S                         | c.1036      | 0.005076324 | 7.622 | 1 |
| 1344 | GRM5   | ENST00000305447 | p.G369E                         | c.1106      | 0.005076324 | 0     | 1 |
| 1345 | SPOP   | ENST00000503676 | p.P223S                         | c.667       | 0.130074291 | 0     | 1 |
| 1345 | SPOP   | ENST00000503676 | p.A281S                         | c.841       | 0.107267632 | 3.257 | 1 |
| 1345 | SPOP   | ENST00000503676 | p.L282R                         | c.845       | 0.028135362 | 5.295 | 1 |
| 1346 | RBMX   | ENST00000320676 | p.P59Q                          | c.176       | 0.201800269 | 0     | 1 |
| 1346 | RBMX   | ENST00000320676 | p.G8V                           | c.23        | 0.201800269 | 2.309 | 1 |
| 1347 | WARS   | ENST00000355338 | p.G392V                         | c.1175      | 0.019688209 | 5.776 | 1 |
| 1347 | WARS   | ENST00000355338 | p.C394Y                         | c.1181      | 0.080274806 | 3.665 | 1 |
| 1347 | WARS   | ENST00000355338 | p.R417M                         | c.1250      | 0.097085579 | 0     | 1 |
| 1348 | AHCYL2 | ENST00000325006 | p.L379I                         | c.1135      | 0.019440765 | 0     | 1 |
| 1348 | AHCYL2 | ENST00000325006 | p.S416F                         | c.1247      | 0.0108738   | 6.523 | 1 |
| 1348 | AHCYL2 | ENST00000325006 | p.S529F                         | c.1586      | 0.008566966 | 6.867 | 1 |
| 1349 | TASP1  | ENST00000337743 | p.V86I                          | c.256       | 0.174288985 | 0     | 1 |
| 1349 | TASP1  | ENST00000337743 | p.A237T                         | c.709       | 0.109466735 | 3.292 | 1 |
| 1349 | TASP1  | ENST00000337743 | p.A249V                         | c.746       | 0.079563473 | 3.792 | 1 |
| 1350 | SCN5A  | ENST00000333535 | p.M1851I                        | c.5553      | 0.027776334 | 0     | 1 |
| 1350 | SCN5A  | ENST00000333535 | p.K1872R                        | c.5615      | 0.027776334 | 5.17  | 1 |
| 1351 | SMAD4  | ENST00000342988 | p.A406T                         | c.1216      | 0.129772903 | 0     | 1 |
| 1351 | SMAD4  | ENST00000342988 | p.K428T                         | c.1283      | 0.092514407 | 3.492 | 1 |
| 1351 | SMAD4  | ENST00000342988 | p.S504R                         | c.1512      | 0.044527634 | 4.612 | 1 |
| 1352 | RSPO1  | ENST00000401068 | p.G82E                          | c.245       | 0.004716721 | 0     | 1 |
| 1352 | RSPO1  | ENST00000401068 | p.K113T                         | c.338       | 0.004716721 | 7.728 | 1 |
| 1353 | ACLY   | ENST00000590151 | p.S7L                           | c.20        | 0.073914438 | 3.758 | 1 |
| 1353 | ACLY   | ENST00000590151 | p.T10M                          | c.29        | 0.012985092 | 6.267 | 1 |
| 1353 | ACLY   | ENST00000590151 | p.P239L                         | c.716       | 0.086899529 | 0     | 1 |
| 1354 | BPI    | ENST00000262865 | p.M255I                         | c.765       | 1.005734963 | 0     | 2 |
| 1354 | BPI    | ENST00000262865 | p.V32I                          | c.94        | 0.234121626 | 7.446 | 1 |

|      |           |                 |          |        |             |       |   |
|------|-----------|-----------------|----------|--------|-------------|-------|---|
| 1355 | AHCYL2    | ENST00000325006 | p.S472G  | c.1414 | 0.006848482 | 0     | 1 |
| 1355 | AHCYL2    | ENST00000325006 | p.H506R  | c.1517 | 0.006848482 | 7.19  | 1 |
| 1356 | STAT1     | ENST00000409465 | p.K511E  | c.1531 | 0.019873641 | 0     | 1 |
| 1356 | STAT1     | ENST00000409465 | p.D575E  | c.1725 | 0.019873641 | 5.653 | 1 |
| 1357 | VPS33A    | ENST00000267199 | p.R471C  | c.1411 | 0.182588033 | 2.716 | 1 |
| 1357 | VPS33A    | ENST00000267199 | p.L472F  | c.1414 | 0.05963842  | 4.272 | 1 |
| 1357 | VPS33A    | ENST00000267199 | p.R498W  | c.1492 | 0.207383034 | 0     | 1 |
| 1357 | VPS33A    | ENST00000267199 | p.T282M  | c.845  | 0.025941143 | 8.189 | 1 |
| 1358 | STK24     | ENST00000376547 | p.A134T  | c.400  | 1.00563644  | 0     | 2 |
| 1358 | STK24     | ENST00000376547 | p.A160T  | c.478  | 0.05192786  | 7.471 | 1 |
| 1359 | ARHGAP9   | ENST00000393797 | p.K396M  | c.1187 | 0.068535724 | 0     | 1 |
| 1359 | ARHGAP9   | ENST00000393797 | p.A500S  | c.1498 | 0.068535724 | 3.867 | 1 |
| 1360 | RPL30     | ENST00000287038 | p.T34I   | c.101  | 0.09297586  | 3.427 | 1 |
| 1360 | RPL30     | ENST00000287038 | p.L94V   | c.280  | 0.09297586  | 0     | 1 |
| 1361 | CYP2C9    | ENST00000260682 | p.R335Q  | c.1004 | 1.162812447 | 0     | 2 |
| 1361 | CYP2C9    | ENST00000260682 | p.Q454H  | c.1362 | 0.390361922 | 2.746 | 1 |
| 1361 | CYP2C9    | ENST00000260682 | p.E328K  | c.982  | 0.013930895 | 9.288 | 1 |
| 1361 | CYP2C9    | ENST00000260682 | p.I331F  | c.991  | 0.105801485 | 6.363 | 1 |
| 1362 | DDX58     | ENST00000379883 | p.R466W  | c.1396 | 0.026088571 | 6.349 | 1 |
| 1362 | DDX58     | ENST00000379883 | p.Y473C  | c.1418 | 0.019873641 | 5.653 | 1 |
| 1362 | DDX58     | ENST00000379883 | p.L552I  | c.1654 | 0.032141268 | 0     | 1 |
| 1363 | CSNK2A1   | ENST00000349736 | p.L70I   | c.208  | 1.116107566 | 0     | 2 |
| 1363 | CSNK2A1   | ENST00000349736 | p.A110T  | c.328  | 0.209719708 | 3.262 | 1 |
| 1363 | CSNK2A1   | ENST00000349736 | p.G177S  | c.529  | 0.034132091 | 6.397 | 1 |
| 1364 | SAMHD1    | ENST00000262878 | p.I397L  | c.1189 | 0.087985915 | 0     | 1 |
| 1364 | SAMHD1    | ENST00000262878 | p.L422P  | c.1265 | 0.026516586 | 6.369 | 1 |
| 1364 | SAMHD1    | ENST00000262878 | p.E429D  | c.1287 | 0.07588718  | 3.72  | 1 |
| 1365 | TMPRSS11E | ENST00000305363 | p.T250I  | c.749  | 1.113824631 | 0     | 1 |
| 1365 | TMPRSS11E | ENST00000305363 | p.T250K  | c.749  | 1.113824631 | 0     | 1 |
| 1365 | TMPRSS11E | ENST00000305363 | p.P253H  | c.758  | 0.040311036 | 8.102 | 1 |
| 1365 | TMPRSS11E | ENST00000305363 | p.L329F  | c.985  | 0.253401853 | 3.182 | 1 |
| 1366 | KLK3      | ENST00000598145 | p.T73K   | c.218  | 0.020307147 | 8.839 | 1 |
| 1366 | KLK3      | ENST00000598145 | p.S91Y   | c.272  | 0.033728953 | 5.054 | 1 |
| 1367 | OTC       | ENST00000039007 | p.L42H   | c.125  | 0.049070507 | 4.349 | 1 |
| 1367 | OTC       | ENST00000039007 | p.S60T   | c.178  | 0.017289021 | 5.854 | 1 |
| 1367 | OTC       | ENST00000039007 | p.L173R  | c.518  | 0.066359529 | 0     | 1 |
| 1368 | MET       | ENST00000318493 | p.L1223V | c.3667 | 0.009407323 | 6.732 | 1 |
| 1368 | MET       | ENST00000318493 | p.M1268T | c.3803 | 0.009407323 | 0     | 1 |
| 1369 | HDC       | ENST00000267845 | p.T247N  | c.740  | 0.059931054 | 6.232 | 1 |
| 1369 | HDC       | ENST00000267845 | p.D273N  | c.817  | 1.013303964 | 0     | 2 |
| 1370 | ZMPSTE24  | ENST00000372759 | p.E150Q  | c.448  | 0.13057947  | 0     | 1 |
| 1370 | ZMPSTE24  | ENST00000372759 | p.H263R  | c.788  | 0.13057947  | 2.937 | 1 |
| 1371 | MIA       | ENST00000594436 | p.S46F   | c.137  | 0.013084476 | 0     | 1 |
| 1371 | MIA       | ENST00000594436 | p.S74F   | c.221  | 0.013084476 | 6.256 | 1 |
| 1372 | PIWIL2    | ENST00000454009 | p.R428C  | c.1282 | 1.061682284 | 0     | 1 |
| 1372 | PIWIL2    | ENST00000454009 | p.R428H  | c.1283 | 1.061682284 | 0     | 1 |
| 1372 | PIWIL2    | ENST00000454009 | p.I473V  | c.1417 | 0.12495761  | 4.019 | 1 |
| 1373 | CHN2      | ENST00000539406 | p.M497I  | c.1491 | 0.114735928 | 0     | 1 |
| 1373 | CHN2      | ENST00000539406 | p.Y527C  | c.1580 | 0.018076287 | 5.925 | 1 |

|      |         |                 |          |             |             |       |   |
|------|---------|-----------------|----------|-------------|-------------|-------|---|
| 1373 | CHN2    | ENST00000539406 | p.I531V  | c.1591      | 0.099894682 | 3.347 | 1 |
| 1374 | MMP10   | ENST00000279441 | p.P186S  | c.556       | 0.014988502 | 0     | 1 |
| 1374 | MMP10   | ENST00000279441 | p.L261I  | c.781       | 0.014988502 | 6.06  | 1 |
| 1375 | MAGEA4  | ENST00000393920 | p.S186F  | c.557       | 0.145394739 | 2.856 | 1 |
| 1375 | MAGEA4  | ENST00000393920 | p.Y187C  | c.560       | 0.059939605 | 4.247 | 1 |
| 1375 | MAGEA4  | ENST00000393920 | p.R277M  | c.830       | 0.190785987 | 0     | 1 |
| 1376 | IL1RL1  | ENST00000233954 | p.P114T  | c.340       | 1.006049367 | 0     | 1 |
| 1376 | IL1RL1  | ENST00000233954 | p.P114Q  | c.341_342   | 1.006049367 | 0     | 1 |
| 1376 | IL1RL1  | ENST00000233954 | p.W25C   | c.75        | 0.023755073 | 7.369 | 1 |
| 1378 | PDE9A   | ENST00000291539 | p.H356Y  | c.1066      | 0.07219775  | 3.906 | 1 |
| 1378 | PDE9A   | ENST00000291539 | p.R368H  | c.1103      | 0.062895373 | 7.708 | 1 |
| 1378 | PDE9A   | ENST00000291539 | p.P406H  | c.1217      | 0.145900658 | 3.603 | 1 |
| 1378 | PDE9A   | ENST00000291539 | p.E483K  | c.1447      | 0.15378833  | 0     | 1 |
| 1379 | VWF     | ENST00000261405 | p.I1372T | c.4115      | 0.039244277 | 4.817 | 1 |
| 1379 | VWF     | ENST00000261405 | p.R1379C | c.4135      | 0.109978587 | 3.235 | 1 |
| 1379 | VWF     | ENST00000261405 | p.V1409I | c.4225      | 0.141686941 | 0     | 1 |
| 1380 | SULT2A1 | ENST00000222002 | p.V37I   | c.109       | 0.108838102 | 4.367 | 1 |
| 1380 | SULT2A1 | ENST00000222002 | p.S108Y  | c.323       | 1.091239695 | 0     | 2 |
| 1380 | SULT2A1 | ENST00000222002 | p.R27C   | c.79        | 0.087628331 | 4.547 | 1 |
| 1381 | ANGPT1  | ENST00000517746 | p.N400K  | c.1200      | 0.007463148 | 7.066 | 1 |
| 1381 | ANGPT1  | ENST00000517746 | p.R402S  | c.1206      | 0.007375722 | 7.083 | 1 |
| 1381 | ANGPT1  | ENST00000517746 | p.D433G  | c.1299_1298 | 0.01483887  | 0     | 1 |
| 1382 | G3BP1   | ENST00000356245 | p.S39F   | c.116       | 0.047063961 | 4.584 | 1 |
| 1382 | G3BP1   | ENST00000356245 | p.Q93R   | c.278       | 0.134151231 | 2.957 | 1 |
| 1382 | G3BP1   | ENST00000356245 | p.I130V  | c.388       | 0.170476218 | 0     | 1 |
| 1384 | ERBB4   | ENST00000342788 | p.I353N  | c.1058      | 0.04264115  | 0     | 1 |
| 1384 | ERBB4   | ENST00000342788 | p.P386R  | c.1157      | 0.013734993 | 6.186 | 1 |
| 1384 | ERBB4   | ENST00000342788 | p.E387D  | c.1161      | 0.012841878 | 6.283 | 1 |
| 1384 | ERBB4   | ENST00000342788 | p.N390I  | c.1169      | 0.016064279 | 5.96  | 1 |
| 1385 | SCN2A   | ENST00000283256 | p.D1843N | c.5527      | 0.007562525 | 0     | 1 |
| 1385 | SCN2A   | ENST00000283256 | p.R1876Q | c.5627      | 0.003075422 | 8.345 | 1 |
| 1385 | SCN2A   | ENST00000283256 | p.K1901Q | c.5701      | 0.004487103 | 7.8   | 1 |
| 1386 | IRS1    | ENST00000305123 | p.R75W   | c.223       | 0.220791556 | 3.474 | 1 |
| 1386 | IRS1    | ENST00000305123 | p.K161N  | c.483       | 0.024650767 | 9.055 | 1 |
| 1386 | IRS1    | ENST00000305123 | p.W164L  | c.491       | 1.313103085 | 0     | 1 |
| 1386 | IRS1    | ENST00000305123 | p.W164C  | c.492       | 1.313103085 | 0     | 1 |
| 1386 | IRS1    | ENST00000305123 | p.V195M  | c.583       | 0.030313937 | 6.235 | 1 |
| 1386 | IRS1    | ENST00000305123 | p.M249L  | c.745       | 0.409416815 | 2.371 | 1 |
| 1386 | IRS1    | ENST00000305123 | p.E251K  | c.751       | 0.033426243 | 6.094 | 1 |
| 1387 | IL17A   | ENST00000340057 | p.R43Q   | c.128_129   | 0.04165768  | 6.513 | 1 |
| 1387 | IL17A   | ENST00000340057 | p.E83Q   | c.247       | 0.196174028 | 7.111 | 1 |
| 1387 | IL17A   | ENST00000340057 | p.S132F  | c.395       | 1.018183386 | 0     | 2 |
| 1388 | CHKB    | ENST00000406938 | p.T182I  | c.545       | 0.043254679 | 4.531 | 1 |
| 1388 | CHKB    | ENST00000406938 | p.S231Y  | c.692       | 0.015495574 | 6.012 | 1 |
| 1388 | CHKB    | ENST00000406938 | p.S268I  | c.803       | 0.058750253 | 0     | 1 |
| 1389 | INPPL1  | ENST00000541756 | p.R369C  | c.1105      | 0.021777769 | 6.521 | 1 |
| 1389 | INPPL1  | ENST00000541756 | p.R399W  | c.1195      | 0.03619665  | 5.788 | 1 |
| 1389 | INPPL1  | ENST00000541756 | p.R449W  | c.1345      | 1.02898721  | 0     | 1 |
| 1389 | INPPL1  | ENST00000541756 | p.R449Q  | c.1346      | 1.02898721  | 0     | 1 |

|              |                 |          |             |             |       |   |
|--------------|-----------------|----------|-------------|-------------|-------|---|
| 1390 TLR8    | ENST00000311912 | p.E56G   | c.167       | 0.057411741 | 0     | 1 |
| 1390 TLR8    | ENST00000311912 | p.T78A   | c.232       | 0.048968574 | 4.352 | 1 |
| 1390 TLR8    | ENST00000311912 | p.L86P   | c.257       | 0.008443167 | 6.888 | 1 |
| 1391 A2M     | ENST00000318602 | p.R1163S | c.3489      | 0.013111713 | 6.253 | 1 |
| 1391 A2M     | ENST00000318602 | p.Q1220H | c.3660      | 0.013111713 | 0     | 1 |
| 1392 SLAMF6  | ENST00000368057 | p.L130M  | c.388       | 0.009382422 | 8.603 | 1 |
| 1392 SLAMF6  | ENST00000368057 | p.Q134K  | c.400       | 0.019832358 | 5.656 | 1 |
| 1392 SLAMF6  | ENST00000368057 | p.T136N  | c.407       | 0.003323686 | 8.233 | 1 |
| 1392 SLAMF6  | ENST00000368057 | p.C195Y  | c.584       | 0.025727854 | 0     | 1 |
| 1393 NLGN4X  | ENST00000381095 | p.N364K  | c.1092      | 0.025147056 | 5.445 | 1 |
| 1393 NLGN4X  | ENST00000381095 | p.V248L  | c.742       | 0.097648639 | 3.389 | 1 |
| 1393 NLGN4X  | ENST00000381095 | p.F273L  | c.819       | 0.118413104 | 0     | 1 |
| 1394 SPSB1   | ENST00000328089 | p.S55L   | c.164       | 0.03112962  | 5.134 | 1 |
| 1394 SPSB1   | ENST00000328089 | p.V91I   | c.271       | 0.121583006 | 0     | 1 |
| 1394 SPSB1   | ENST00000328089 | p.P211S  | c.631       | 0.095756296 | 3.425 | 1 |
| 1395 B4GALT1 | ENST00000379731 | p.V271I  | c.811       | 0.095325103 | 0     | 1 |
| 1395 B4GALT1 | ENST00000379731 | p.R330C  | c.988       | 0.095325103 | 3.391 | 1 |
| 1397 LY96    | ENST00000284818 | p.G59E   | c.176       | 0.045122787 | 5.47  | 1 |
| 1397 LY96    | ENST00000284818 | p.R90C   | c.268       | 1.022561394 | 0     | 2 |
| 1398 IL20    | ENST00000367098 | p.V53M   | c.157       | 0.02323308  | 0     | 1 |
| 1398 IL20    | ENST00000367098 | p.L106F  | c.316       | 0.002729779 | 8.517 | 1 |
| 1398 IL20    | ENST00000367098 | p.I109F  | c.325       | 0.020503301 | 5.608 | 1 |
| 1399 SPAST   | ENST00000315285 | p.K388E  | c.1162      | 0.045919174 | 0     | 1 |
| 1399 SPAST   | ENST00000315285 | p.F439C  | c.1316      | 0.04143518  | 4.593 | 1 |
| 1399 SPAST   | ENST00000315285 | p.D444Y  | c.1330      | 0.004483994 | 7.801 | 1 |
| 1400 ME1     | ENST00000369705 | p.D152V  | c.455       | 0.026864672 | 5.467 | 1 |
| 1400 ME1     | ENST00000369705 | p.G153E  | c.458       | 0.012778265 | 7.078 | 1 |
| 1400 ME1     | ENST00000369705 | p.C164S  | c.490       | 0.111857907 | 3.296 | 1 |
| 1400 ME1     | ENST00000369705 | p.D194N  | c.580       | 0.131823132 | 0     | 1 |
| 1401 BIN2    | ENST00000267012 | p.G57C   | c.169       | 0.01225398  | 0     | 1 |
| 1401 BIN2    | ENST00000267012 | p.E126K  | c.376       | 0.006679705 | 7.226 | 1 |
| 1401 BIN2    | ENST00000267012 | p.R202H  | c.605       | 0.005574275 | 7.487 | 1 |
| 1402 ACVRL1  | ENST00000550683 | p.R343C  | c.1027      | 0.038186606 | 0     | 1 |
| 1402 ACVRL1  | ENST00000550683 | p.G364S  | c.1090      | 0.006730829 | 7.215 | 1 |
| 1402 ACVRL1  | ENST00000550683 | p.V367G  | c.1100      | 0.033214111 | 5.386 | 1 |
| 1402 ACVRL1  | ENST00000550683 | p.V394W  | c.1180_1181 | 0.007733138 | 7.621 | 1 |
| 1402 ACVRL1  | ENST00000550683 | p.I399F  | c.1195      | 0.004703918 | 8.666 | 1 |
| 1403 AKR1B1  | ENST00000285930 | p.E85K   | c.253       | 0.094107498 | 3.588 | 1 |
| 1403 AKR1B1  | ENST00000285930 | p.K86R   | c.257       | 0.142619563 | 2.925 | 1 |
| 1403 AKR1B1  | ENST00000285930 | p.A143V  | c.428       | 0.214828195 | 0     | 1 |
| 1404 EXOSC7  | ENST00000265564 | p.M66I   | c.198       | 0.038406895 | 4.756 | 1 |
| 1404 EXOSC7  | ENST00000265564 | p.F81L   | c.243       | 0.00420115  | 7.895 | 1 |
| 1404 EXOSC7  | ENST00000265564 | p.V134L  | c.400       | 0.041209638 | 0     | 1 |
| 1405 EPHX2   | ENST00000521400 | p.A377T  | c.1129      | 0.078945454 | 0     | 1 |
| 1405 EPHX2   | ENST00000521400 | p.S418F  | c.1253      | 0.078945454 | 3.663 | 1 |
| 1406 HBE1    | ENST00000380237 | p.K88R   | c.263       | 0.072854635 | 0     | 1 |
| 1406 HBE1    | ENST00000380237 | p.A141S  | c.421       | 0.071706892 | 3.86  | 1 |
| 1406 HBE1    | ENST00000380237 | p.A143V  | c.428       | 0.003985565 | 7.971 | 1 |
| 1407 LGR4    | ENST00000379214 | p.L388P  | c.1163      | 0.029180681 | 5.182 | 1 |

|              |                 |         |           |             |       |    |
|--------------|-----------------|---------|-----------|-------------|-------|----|
| 1407 LGR4    | ENST00000379214 | p.S390F | c.1169    | 0.060968309 | 4.075 | 1  |
| 1407 LGR4    | ENST00000379214 | p.P414S | c.1240    | 0.086880137 | 0     | 1  |
| 1408 RACGAP1 | ENST00000547905 | p.P432L | c.1295    | 0.080102995 | 3.642 | 1  |
| 1408 RACGAP1 | ENST00000547905 | p.I504M | c.1512    | 0.080102995 | 0     | 1  |
| 1409 DCTD    | ENST00000357067 | p.A50T  | c.148     | 1.094349217 | 0     | 2  |
| 1409 DCTD    | ENST00000357067 | p.A96T  | c.286     | 0.157919164 | 3.832 | 1  |
| 1409 DCTD    | ENST00000357067 | p.A117P | c.349     | 0.073775846 | 5.373 | 1  |
| 1410 ZGPAT   | ENST00000328969 | p.Y139S | c.416     | 0.005030788 | 7.635 | 1  |
| 1410 ZGPAT   | ENST00000328969 | p.M151V | c.451     | 0.007012733 | 9.644 | 1  |
| 1410 ZGPAT   | ENST00000328969 | p.P213L | c.638     | 0.011638996 | 0     | 1  |
| 1410 ZGPAT   | ENST00000328969 | p.R237H | c.710     | 0.011121119 | 7.544 | 1  |
| 1411 NFKB1   | ENST00000226574 | p.L45P  | c.134     | 0.009112104 | 6.778 | 1  |
| 1411 NFKB1   | ENST00000226574 | p.M216R | c.647     | 0.054109958 | 0     | 1  |
| 1411 NFKB1   | ENST00000226574 | p.A239T | c.715     | 0.053817888 | 4.474 | 1  |
| 1412 SMS     | ENST00000404933 | p.V356A | c.1067    | 0.044082674 | 4.596 | 1  |
| 1412 SMS     | ENST00000404933 | p.D128E | c.384     | 0.073361315 | 3.919 | 1  |
| 1412 SMS     | ENST00000404933 | p.C318Y | c.953     | 0.107458543 | 0     | 1  |
| 1413 NTRK3   | ENST00000360948 | p.Q531R | c.1592    | 0.096511663 | 0     | 1  |
| 1413 NTRK3   | ENST00000360948 | p.E590K | c.1768    | 0.004815829 | 7.698 | 1  |
| 1413 NTRK3   | ENST00000360948 | p.Y604F | c.1811    | 0.091695834 | 3.447 | 1  |
| 1414 LRRC4   | ENST00000249363 | p.V59M  | c.175     | 0.024343992 | 7.157 | 1  |
| 1414 LRRC4   | ENST00000249363 | p.V103I | c.307     | 1.007006939 | 0     | 1  |
| 1414 LRRC4   | ENST00000249363 | p.V103A | c.308     | 1.007006939 | 0     | 1  |
| 1415 A2M     | ENST00000318602 | p.T548I | c.1643    | 0.00585141  | 7.417 | 1  |
| 1415 A2M     | ENST00000318602 | p.P29Q  | c.86      | 0.00585141  | 0     | 1  |
| 1416 PGK1    | ENST00000373316 | p.G410V | c.1229    | 0.048327896 | 4.371 | 1  |
| 1416 PGK1    | ENST00000373316 | p.G167D | c.500     | 0.017169597 | 5.864 | 1  |
| 1416 PGK1    | ENST00000373316 | p.M190I | c.570     | 0.065497493 | 0     | 1  |
| 1417 DLD     | ENST00000205402 | p.K417E | c.1249    | 0.02121164  | 5.559 | 1  |
| 1417 DLD     | ENST00000205402 | p.S446L | c.1337    | 0.033885502 | 0     | 1  |
| 1417 DLD     | ENST00000205402 | p.P333S | c.997     | 0.012673862 | 6.302 | 1  |
| 1418 MAGEA4  | ENST00000393920 | p.A211E | c.632     | 0.099070364 | 3.441 | 1  |
| 1418 MAGEA4  | ENST00000393920 | p.D215E | c.645     | 0.082932183 | 3.719 | 1  |
| 1418 MAGEA4  | ENST00000393920 | p.Y284N | c.850     | 0.16801778  | 0     | 1  |
| 1419 KRAS    | ENST00000256078 | p.I36M  | c.108     | 4.180603825 | 5.798 | 1  |
| 1419 KRAS    | ENST00000256078 | p.A59T  | c.175     | 27.87368317 | 3.003 | 1  |
| 1419 KRAS    | ENST00000256078 | p.A59E  | c.176     | 27.87368317 | 3.003 | 1  |
| 1419 KRAS    | ENST00000256078 | p.A59G  | c.176     | 27.87368317 | 3.003 | 1  |
| 1419 KRAS    | ENST00000256078 | p.Q61K  | c.181_180 | 37.49946109 | 3.423 | 3  |
| 1419 KRAS    | ENST00000256078 | p.Q61L  | c.182     | 37.49946109 | 3.423 | 6  |
| 1419 KRAS    | ENST00000256078 | p.Q61R  | c.182     | 37.49946109 | 3.423 | 3  |
| 1419 KRAS    | ENST00000256078 | p.Q61H  | c.183     | 37.49946109 | 3.423 | 8  |
| 1419 KRAS    | ENST00000256078 | p.E62K  | c.184     | 5.558446135 | 5.185 | 1  |
| 1419 KRAS    | ENST00000256078 | p.G12C  | c.34      | 199.3806168 | 0     | 43 |
| 1419 KRAS    | ENST00000256078 | p.G12R  | c.34      | 199.3806168 | 0     | 6  |
| 1419 KRAS    | ENST00000256078 | p.G12S  | c.34      | 199.3806168 | 0     | 4  |
| 1419 KRAS    | ENST00000256078 | p.G12A  | c.35      | 199.3806168 | 0     | 12 |
| 1419 KRAS    | ENST00000256078 | p.G12D  | c.35      | 199.3806168 | 0     | 68 |
| 1419 KRAS    | ENST00000256078 | p.G12V  | c.35      | 199.3806168 | 0     | 63 |

|             |                 |          |         |             |       |    |
|-------------|-----------------|----------|---------|-------------|-------|----|
| 1419 KRAS   | ENST00000256078 | p.G12F   | c.35_34 | 199.3806168 | 0     | 2  |
| 1419 KRAS   | ENST00000256078 | p.G13C   | c.37    | 29.75340752 | 8.235 | 3  |
| 1419 KRAS   | ENST00000256078 | p.G13D   | c.38    | 29.75340752 | 8.235 | 25 |
| 1419 KRAS   | ENST00000256078 | p.G13V   | c.38    | 29.75340752 | 8.235 | 1  |
| 1420 NLGN4X | ENST00000381095 | p.G341R  | c.1021  | 0.04785364  | 6.051 | 1  |
| 1420 NLGN4X | ENST00000381095 | p.D345N  | c.1033  | 1.087140229 | 4.832 | 2  |
| 1420 NLGN4X | ENST00000381095 | p.G220D  | c.659   | 1.0918751   | 0     | 1  |
| 1420 NLGN4X | ENST00000381095 | p.G220V  | c.659   | 1.0918751   | 0     | 1  |
| 1420 NLGN4X | ENST00000381095 | p.P293Q  | c.878   | 0.08090403  | 7.249 | 1  |
| 1421 TPP1   | ENST00000299427 | p.N489S  | c.1466  | 0.139177702 | 0     | 1  |
| 1421 TPP1   | ENST00000299427 | p.N222I  | c.665   | 0.139177702 | 2.845 | 1  |
| 1422 APEX1  | ENST00000216714 | p.R193C  | c.577   | 1.018491422 | 0     | 1  |
| 1422 APEX1  | ENST00000216714 | p.R193H  | c.578   | 1.018491422 | 0     | 1  |
| 1422 APEX1  | ENST00000216714 | p.Q245R  | c.734   | 0.036982844 | 5.757 | 1  |
| 1423 PROC   | ENST00000453608 | p.L358R  | c.1073  | 1.020067435 | 0     | 2  |
| 1423 PROC   | ENST00000453608 | p.C309F  | c.926   | 0.091292266 | 5.639 | 1  |
| 1424 GSTM2  | ENST00000369831 | p.K31N   | c.93    | 0.034915223 | 0     | 1  |
| 1425 SIRPG  | ENST00000303415 | p.T54I   | c.161   | 0.06515411  | 3.94  | 1  |
| 1425 SIRPG  | ENST00000303415 | p.S57F   | c.170   | 0.007067517 | 8.082 | 1  |
| 1425 SIRPG  | ENST00000303415 | p.Q80H   | c.240   | 0.004177918 | 7.903 | 1  |
| 1425 SIRPG  | ENST00000303415 | p.D101Y  | c.301   | 0.073022446 | 0     | 1  |
| 1426 EED    | ENST00000351625 | p.S156T  | c.467   | 0.074222479 | 0     | 1  |
| 1426 EED    | ENST00000351625 | p.P203T  | c.607   | 0.074222479 | 3.752 | 1  |
| 1427 HK3    | ENST00000292432 | p.P530T  | c.1588  | 0.002384661 | 8.712 | 1  |
| 1427 HK3    | ENST00000292432 | p.V555M  | c.1663  | 0.002384661 | 0     | 1  |
| 1428 NUMBL  | ENST00000598779 | p.P108S  | c.322   | 0.087656203 | 3.512 | 1  |
| 1428 NUMBL  | ENST00000598779 | p.E141K  | c.421   | 0.087656203 | 0     | 1  |
| 1429 BCAR3  | ENST00000370243 | p.C561Y  | c.1682  | 0.010061575 | 6.635 | 1  |
| 1429 BCAR3  | ENST00000370243 | p.R601K  | c.1802  | 0.010061575 | 0     | 1  |
| 1430 RHEB   | ENST00000262187 | p.G63W   | c.187   | 0.123279088 | 3.02  | 1  |
| 1430 RHEB   | ENST00000262187 | p.G13N   | c.38_37 | 0.123279088 | 0     | 1  |
| 1431 PDHA1  | ENST00000379806 | p.V93L   | c.277   | 0.05421531  | 8.961 | 1  |
| 1431 PDHA1  | ENST00000379806 | p.G145D  | c.434   | 2.107252847 | 0     | 3  |
| 1431 PDHA1  | ENST00000379806 | p.E302K  | c.904   | 0.073022246 | 6.035 | 1  |
| 1431 PDHA1  | ENST00000379806 | p.R305K  | c.914   | 0.304477871 | 3.474 | 1  |
| 1432 CRYBB1 | ENST00000215939 | p.G111R  | c.331   | 0.076468003 | 3.709 | 1  |
| 1432 CRYBB1 | ENST00000215939 | p.R132C  | c.394   | 0.076468003 | 0     | 1  |
| 1433 ADSSL1 | ENST00000332972 | p.R368C  | c.1102  | 0.084905393 | 0     | 1  |
| 1433 ADSSL1 | ENST00000332972 | p.V412I  | c.1234  | 0.084905393 | 3.558 | 1  |
| 1434 CHID1  | ENST00000323541 | p.Y418N  | c.1252  | 0.033871003 | 5.137 | 1  |
| 1434 CHID1  | ENST00000323541 | p.F70I   | c.208   | 0.025506345 | 5.293 | 1  |
| 1434 CHID1  | ENST00000323541 | p.R95C   | c.283   | 0.053925353 | 0     | 1  |
| 1436 MGAM   | ENST00000475668 | p.G1014E | c.3041  | 0.057252062 | 0     | 1  |
| 1436 MGAM   | ENST00000475668 | p.T1043S | c.3127  | 0.048529305 | 4.365 | 1  |
| 1436 MGAM   | ENST00000475668 | p.P1078S | c.3232  | 0.008722758 | 6.841 | 1  |
| 1439 TDRD5  | ENST00000444136 | p.V64F   | c.190   | 0.01998415  | 0     | 1  |
| 1439 TDRD5  | ENST00000444136 | p.R16K   | c.47    | 0.01998415  | 5.645 | 1  |
| 1440 VAT1L  | ENST00000302536 | p.S353F  | c.1058  | 0.122380802 | 6.264 | 1  |
| 1440 VAT1L  | ENST00000302536 | p.I377N  | c.1130  | 0.256047577 | 2.637 | 1  |



|              |                 |          |         |             |       |   |
|--------------|-----------------|----------|---------|-------------|-------|---|
| 1440 VAT1L   | ENST00000302536 | p.L378M  | c.1132  | 0.031776423 | 6.476 | 1 |
| 1440 VAT1L   | ENST00000302536 | p.E105Q  | c.313   | 0.261158908 | 0     | 1 |
| 1440 VAT1L   | ENST00000302536 | p.V130A  | c.389   | 0.058210612 | 4.351 | 1 |
| 1440 VAT1L   | ENST00000302536 | p.A158T  | c.472   | 0.042831923 | 5.203 | 1 |
| 1441 ALDH7A1 | ENST00000409134 | p.R404C  | c.1210  | 2.227090526 | 0     | 1 |
| 1441 ALDH7A1 | ENST00000409134 | p.R404H  | c.1211  | 2.227090526 | 0     | 2 |
| 1441 ALDH7A1 | ENST00000409134 | p.G274E  | c.821   | 1.068803992 | 6.255 | 2 |
| 1441 ALDH7A1 | ENST00000409134 | p.A305S  | c.913   | 1.25444656  | 3.763 | 2 |
| 1441 ALDH7A1 | ENST00000409134 | p.A321T  | c.961   | 0.168652159 | 4.222 | 1 |
| 1442 AGTR1   | ENST00000404754 | p.F251L  | c.753   | 0.018465805 | 0     | 1 |
| 1442 AGTR1   | ENST00000404754 | p.F293L  | c.879   | 0.018465805 | 5.759 | 1 |
| 1443 GABBR1  | ENST00000377034 | p.P58S   | c.172   | 0.26990484  | 4.142 | 1 |
| 1443 GABBR1  | ENST00000377034 | p.T115M  | c.344   | 1.064448458 | 0     | 2 |
| 1443 GABBR1  | ENST00000377034 | p.R126W  | c.376   | 0.193082586 | 7.001 | 1 |
| 1444 PIP4K2A | ENST00000376573 | p.T362A  | c.1084  | 0.084338517 | 0     | 1 |
| 1444 PIP4K2A | ENST00000376573 | p.F178L  | c.534   | 0.014224228 | 8.875 | 1 |
| 1444 PIP4K2A | ENST00000376573 | p.A267T  | c.799   | 0.002161128 | 8.854 | 1 |
| 1444 PIP4K2A | ENST00000376573 | p.D273N  | c.817   | 0.080047491 | 3.643 | 1 |
| 1445 TAS2R39 | ENST00000446620 | p.I55S   | c.164   | 0.079770548 | 0     | 1 |
| 1445 TAS2R39 | ENST00000446620 | p.P304T  | c.910   | 0.079770548 | 3.648 | 1 |
| 1446 ADAM22  | ENST00000315984 | p.V259I  | c.775   | 0.030755751 | 5.023 | 1 |
| 1446 ADAM22  | ENST00000315984 | p.A294V  | c.881   | 0.030755751 | 0     | 1 |
| 1447 CUL3    | ENST00000264414 | p.R90Q   | c.269   | 0.007834191 | 6.996 | 1 |
| 1447 CUL3    | ENST00000264414 | p.V93I   | c.277   | 0.010503398 | 6.573 | 1 |
| 1447 CUL3    | ENST00000264414 | p.V152I  | c.454   | 0.018337589 | 0     | 1 |
| 1448 NLGN4X  | ENST00000381095 | p.H489N  | c.1465  | 0.055216723 | 5.402 | 1 |
| 1448 NLGN4X  | ENST00000381095 | p.S509I  | c.1526  | 0.021790108 | 9.102 | 1 |
| 1448 NLGN4X  | ENST00000381095 | p.L114Q  | c.341   | 0.025745549 | 5.97  | 1 |
| 1448 NLGN4X  | ENST00000381095 | p.L120M  | c.358   | 0.07749346  | 5.737 | 1 |
| 1448 NLGN4X  | ENST00000381095 | p.F128L  | c.384   | 0.124509858 | 3.456 | 1 |
| 1448 NLGN4X  | ENST00000381095 | p.G175R  | c.523   | 0.152367909 | 0     | 1 |
| 1448 NLGN4X  | ENST00000381095 | p.P333Q  | c.998   | 0.066443209 | 9.869 | 1 |
| 1449 CUBN    | ENST00000377833 | p.E1206Q | c.3616  | 0.010843693 | 7.527 | 1 |
| 1449 CUBN    | ENST00000377833 | p.V1225A | c.3674  | 0.015155233 | 7.446 | 1 |
| 1449 CUBN    | ENST00000377833 | p.R1249C | c.3745  | 1.177945182 | 0     | 2 |
| 1449 CUBN    | ENST00000377833 | p.C1278W | c.3834  | 0.050083435 | 5.461 | 1 |
| 1449 CUBN    | ENST00000377833 | p.E1279K | c.3835  | 0.291442706 | 2.795 | 1 |
| 1450 TSHR    | ENST00000298171 | p.N135K  | c.405   | 0.022460568 | 6.466 | 1 |
| 1450 TSHR    | ENST00000298171 | p.N187D  | c.559   | 0.053764713 | 0     | 1 |
| 1450 TSHR    | ENST00000298171 | p.K211T  | c.632   | 0.042452696 | 4.558 | 1 |
| 1451 HUWE1   | ENST00000342160 | p.T4083A | c.12247 | 0.030178755 | 0     | 1 |
| 1451 HUWE1   | ENST00000342160 | p.S4148I | c.12443 | 0.012267627 | 6.349 | 1 |
| 1451 HUWE1   | ENST00000342160 | p.E4149K | c.12445 | 0.017911128 | 5.803 | 1 |
| 1452 PLXNC1  | ENST00000258526 | p.F246I  | c.736   | 0.056250121 | 4.152 | 1 |
| 1452 PLXNC1  | ENST00000258526 | p.I267M  | c.801   | 0.056250121 | 0     | 1 |
| 1453 PTPRO   | ENST00000281171 | p.Y974C  | c.2921  | 0.106875272 | 0     | 1 |
| 1453 PTPRO   | ENST00000281171 | p.N996K  | c.2988  | 0.106875272 | 3.226 | 1 |
| 1454 TAPBP   | ENST00000489157 | p.R121H  | c.362   | 0.074959236 | 0     | 1 |
| 1454 TAPBP   | ENST00000489157 | p.P176R  | c.527   | 0.011093143 | 7.17  | 1 |

|              |                 |          |        |             |       |   |
|--------------|-----------------|----------|--------|-------------|-------|---|
| 1454 TAPBP   | ENST00000489157 | p.E179Q  | c.535  | 0.068015153 | 3.878 | 1 |
| 1455 UPF2    | ENST00000357604 | p.W954L  | c.2861 | 0.014680043 | 0     | 1 |
| 1455 UPF2    | ENST00000357604 | p.E994K  | c.2980 | 0.014680043 | 6.09  | 1 |
| 1456 DHPS    | ENST00000210060 | p.F36L   | c.108  | 0.016299822 | 0     | 1 |
| 1456 DHPS    | ENST00000210060 | p.H122Q  | c.366  | 0.016299822 | 5.939 | 1 |
| 1457 LRP6    | ENST00000261349 | p.N1143T | c.3428 | 0.047629526 | 4.392 | 1 |
| 1457 LRP6    | ENST00000261349 | p.E1168Q | c.3502 | 0.047629526 | 0     | 1 |
| 1458 MYOM1   | ENST00000356443 | p.V1636M | c.4906 | 0.104289979 | 3.325 | 1 |
| 1458 MYOM1   | ENST00000356443 | p.A1639T | c.4915 | 0.009143739 | 6.773 | 1 |
| 1458 MYOM1   | ENST00000356443 | p.S1641L | c.4922 | 0.049625468 | 4.47  | 1 |
| 1458 MYOM1   | ENST00000356443 | p.V1663M | c.4987 | 0.154053825 | 0     | 1 |
| 1459 NR1I3   | ENST00000367979 | p.R254Q  | c.761  | 0.072594296 | 3.784 | 1 |
| 1459 NR1I3   | ENST00000367979 | p.R313L  | c.938  | 0.072594296 | 0     | 1 |
| 1460 COL18A1 | ENST00000359759 | p.G1354A | c.4061 | 0.010746326 | 0     | 1 |
| 1460 COL18A1 | ENST00000359759 | p.R1478H | c.4433 | 0.007854866 | 7.503 | 1 |
| 1460 COL18A1 | ENST00000359759 | p.R1496Q | c.4487 | 0.00523353  | 7.578 | 1 |
| 1461 PLCB3   | ENST00000279230 | p.R44H   | c.131  | 0.008955564 | 0     | 1 |
| 1461 PLCB3   | ENST00000279230 | p.R87Q   | c.260  | 0.008955564 | 6.803 | 1 |
| 1462 RPL9    | ENST00000295955 | p.N42D   | c.124  | 0.01431041  | 0     | 1 |
| 1462 RPL9    | ENST00000295955 | p.T69A   | c.205  | 0.013257936 | 6.237 | 1 |
| 1462 RPL9    | ENST00000295955 | p.R71Q   | c.212  | 0.001052474 | 9.892 | 1 |
| 1463 PVRL1   | ENST00000264025 | p.P56R   | c.167  | 0.207883139 | 3.485 | 1 |
| 1463 PVRL1   | ENST00000264025 | p.V60M   | c.178  | 0.122784942 | 3.162 | 1 |
| 1463 PVRL1   | ENST00000264025 | p.R101Q  | c.302  | 0.210733931 | 0     | 1 |
| 1463 PVRL1   | ENST00000264025 | p.D106V  | c.317  | 0.119374989 | 6.688 | 1 |
| 1464 ALDOB   | ENST00000374855 | p.T253I  | c.758  | 0.101822043 | 0     | 1 |
| 1464 ALDOB   | ENST00000374855 | p.L289R  | c.866  | 0.097719994 | 3.5   | 1 |
| 1464 ALDOB   | ENST00000374855 | p.C290F  | c.869  | 0.014621077 | 6.218 | 1 |
| 1465 AGO2    | ENST00000220592 | p.Q41H   | c.123  | 0.120915849 | 0     | 1 |
| 1465 AGO2    | ENST00000220592 | p.R714L  | c.2141 | 0.085639907 | 3.6   | 1 |
| 1465 AGO2    | ENST00000220592 | p.C717S  | c.2149 | 0.041617267 | 4.701 | 1 |
| 1466 NCAM2   | ENST00000400546 | p.G388W  | c.1162 | 0.119889802 | 3.257 | 1 |
| 1466 NCAM2   | ENST00000400546 | p.P302S  | c.904  | 0.132391709 | 0     | 1 |
| 1466 NCAM2   | ENST00000400546 | p.H303D  | c.907  | 0.022856371 | 9.577 | 1 |
| 1466 NCAM2   | ENST00000400546 | p.E327K  | c.979  | 0.038279308 | 5.239 | 1 |
| 1467 RB1     | ENST00000267163 | p.K94N   | c.282  | 0.015061403 | 6.053 | 1 |
| 1467 RB1     | ENST00000267163 | p.L134V  | c.400  | 0.015061403 | 0     | 1 |
| 1468 CRYGB   | ENST00000260988 | p.F6L    | c.18   | 0.120558598 | 3.255 | 1 |
| 1468 CRYGB   | ENST00000260988 | p.D65Y   | c.193  | 0.16674528  | 2.728 | 1 |
| 1468 CRYGB   | ENST00000260988 | p.R32C   | c.94   | 0.255683466 | 0     | 1 |
| 1469 RAB7A   | ENST00000265062 | p.A65T   | c.193  | 0.0147924   | 0     | 1 |
| 1469 RAB7A   | ENST00000265062 | p.I13F   | c.37   | 0.0147924   | 6.079 | 1 |
| 1470 CPB2    | ENST00000181383 | p.Y156C  | c.467  | 0.041500549 | 7.116 | 1 |
| 1470 CPB2    | ENST00000181383 | p.V222M  | c.664  | 0.076270132 | 3.736 | 1 |
| 1470 CPB2    | ENST00000181383 | p.F244C  | c.731  | 0.077246816 | 5.943 | 1 |
| 1470 CPB2    | ENST00000181383 | p.E286Q  | c.856  | 0.098513832 | 0     | 1 |
| 1471 ETF1    | ENST00000360541 | p.S70L   | c.209  | 0.016209687 | 5.947 | 1 |
| 1471 ETF1    | ENST00000360541 | p.L126F  | c.378  | 0.016209687 | 0     | 1 |
| 1472 TGM3    | ENST00000381458 | p.S424G  | c.1270 | 0.167567362 | 2.695 | 1 |

|             |                 |         |             |             |       |   |
|-------------|-----------------|---------|-------------|-------------|-------|---|
| 1472 TGM3   | ENST00000381458 | p.V436I | c.1306      | 0.071852816 | 6.311 | 1 |
| 1472 TGM3   | ENST00000381458 | p.I163M | c.489       | 0.083688741 | 3.786 | 1 |
| 1472 TGM3   | ENST00000381458 | p.T295N | c.884       | 0.239516102 | 0     | 1 |
| 1473 CR2    | ENST00000367057 | p.S89Y  | c.266       | 1.01367799  | 0     | 2 |
| 1473 CR2    | ENST00000367057 | p.G111C | c.331       | 0.036367585 | 6.192 | 1 |
| 1474 UPF2   | ENST00000357604 | p.R668C | c.2002      | 1.106020807 | 0     | 1 |
| 1474 UPF2   | ENST00000357604 | p.R668S | c.2002      | 1.106020807 | 0     | 1 |
| 1474 UPF2   | ENST00000357604 | p.G671L | c.2012_2011 | 0.096820955 | 7.061 | 1 |
| 1474 UPF2   | ENST00000357604 | p.C704F | c.2111      | 0.079979181 | 7.153 | 1 |
| 1474 UPF2   | ENST00000357604 | p.T709K | c.2126      | 0.264853551 | 3.45  | 1 |
| 1475 LIF    | ENST00000249075 | p.C34W  | c.102       | 0.024294689 | 8.889 | 1 |
| 1475 LIF    | ENST00000249075 | p.R121M | c.362_361   | 0.016377763 | 8.366 | 1 |
| 1475 LIF    | ENST00000249075 | p.S173L | c.518       | 1.005140309 | 0     | 2 |
| 1476 ZRANB1 | ENST00000359653 | p.V561A | c.1682      | 0.064973715 | 3.944 | 1 |
| 1476 ZRANB1 | ENST00000359653 | p.L619V | c.1855      | 0.064973715 | 0     | 1 |
| 1477 UPP2   | ENST00000605860 | p.D115H | c.343       | 0.087468305 | 3.624 | 1 |
| 1477 UPP2   | ENST00000605860 | p.M135I | c.405       | 0.006245358 | 7.323 | 1 |
| 1477 UPP2   | ENST00000605860 | p.E142Q | c.424       | 0.069565295 | 3.958 | 1 |
| 1477 UPP2   | ENST00000605860 | p.E143K | c.427       | 0.015203123 | 6.152 | 1 |
| 1477 UPP2   | ENST00000605860 | p.G164R | c.490       | 0.165762816 | 0     | 1 |
| 1478 CHIA   | ENST00000369740 | p.G60R  | c.178       | 0.032165147 | 5.407 | 1 |
| 1478 CHIA   | ENST00000369740 | p.N63D  | c.187       | 0.012140739 | 6.364 | 1 |
| 1478 CHIA   | ENST00000369740 | p.F119S | c.356       | 0.035709177 | 0     | 1 |
| 1479 DAO    | ENST00000228476 | p.A207T | c.619       | 0.129335912 | 3.055 | 1 |
| 1479 DAO    | ENST00000228476 | p.M210V | c.628       | 0.08390592  | 3.739 | 1 |
| 1479 DAO    | ENST00000228476 | p.V236A | c.707       | 0.195218619 | 0     | 1 |
| 1480 DPYSL3 | ENST00000343218 | p.M476L | c.1426      | 1.115422219 | 0     | 1 |
| 1480 DPYSL3 | ENST00000343218 | p.M476I | c.1428      | 1.115422219 | 0     | 1 |
| 1480 DPYSL3 | ENST00000343218 | p.V524I | c.1570      | 0.121111443 | 5.466 | 1 |
| 1480 DPYSL3 | ENST00000343218 | p.G183V | c.548       | 0.335377002 | 3.664 | 1 |
| 1480 DPYSL3 | ENST00000343218 | p.T216A | c.646       | 0.210090311 | 6.168 | 1 |
| 1481 HPD    | ENST00000289004 | p.G65R  | c.193       | 0.021492841 | 5.54  | 1 |
| 1481 HPD    | ENST00000289004 | p.M180I | c.540       | 0.021492841 | 0     | 1 |
| 1483 GSTA1  | ENST00000334575 | p.T68A  | c.202       | 0.056642494 | 4.856 | 1 |
| 1483 GSTA1  | ENST00000334575 | p.A76V  | c.227       | 0.015066008 | 6.246 | 1 |
| 1483 GSTA1  | ENST00000334575 | p.N80S  | c.239       | 0.160870311 | 2.801 | 1 |
| 1483 GSTA1  | ENST00000334575 | p.S154R | c.462       | 0.19250181  | 0     | 1 |
| 1483 GSTA1  | ENST00000334575 | p.E31K  | c.91        | 0.167229242 | 9.578 | 1 |
| 1485 S100B  | ENST00000291700 | p.D70N  | c.208       | 0.220064753 | 0     | 1 |
| 1485 S100B  | ENST00000291700 | p.V14I  | c.40        | 0.220064753 | 2.184 | 1 |
| 1486 HHIP   | ENST00000296575 | p.D431N | c.1291      | 1.046322464 | 0     | 2 |
| 1486 HHIP   | ENST00000296575 | p.G457E | c.1370      | 0.084558776 | 4.695 | 1 |
| 1486 HHIP   | ENST00000296575 | p.P490S | c.1468      | 0.127674951 | 7.018 | 1 |
| 1487 EXOSC5 | ENST00000221233 | p.R190Q | c.569       | 0.080604266 | 0     | 1 |
| 1487 EXOSC5 | ENST00000221233 | p.S217W | c.650       | 0.080604266 | 3.633 | 1 |
| 1488 F9     | ENST00000218099 | p.L372I | c.1114      | 0.279803424 | 6.206 | 1 |
| 1488 F9     | ENST00000218099 | p.M394L | c.1180      | 0.130842325 | 9.362 | 1 |
| 1488 F9     | ENST00000218099 | p.F395L | c.1185      | 0.168227547 | 9.051 | 1 |
| 1488 F9     | ENST00000218099 | p.D410N | c.1228      | 1.033674145 | 0     | 1 |

|                |                 |         |             |             |       |   |
|----------------|-----------------|---------|-------------|-------------|-------|---|
| 1488 F9        | ENST00000218099 | p.D410E | c.1230      | 1.033674145 | 0     | 1 |
| 1488 F9        | ENST00000218099 | p.G442R | c.1324      | 0.047039449 | 5.902 | 1 |
| 1489 HIST1H2BK | ENST00000356950 | p.E36K  | c.106       | 0.018060077 | 0     | 1 |
| 1489 HIST1H2BK | ENST00000356950 | p.M60I  | c.180       | 0.004635691 | 7.753 | 1 |
| 1489 HIST1H2BK | ENST00000356950 | p.V67I  | c.199       | 0.0145057   | 6.219 | 1 |
| 1490 AHCYL1    | ENST00000369799 | p.R173C | c.517       | 0.159541096 | 2.648 | 1 |
| 1490 AHCYL1    | ENST00000369799 | p.R214H | c.641       | 0.159541096 | 0     | 1 |
| 1491 SERPINA6  | ENST00000341584 | p.Q114H | c.342       | 0.03184035  | 4.973 | 1 |
| 1491 SERPINA6  | ENST00000341584 | p.E152V | c.455       | 0.03184035  | 0     | 1 |
| 1492 PFKM      | ENST00000340802 | p.K546N | c.1638      | 0.009678505 | 0     | 1 |
| 1492 PFKM      | ENST00000340802 | p.G582D | c.1745      | 0.009678505 | 6.691 | 1 |
| 1493 BARD1     | ENST00000260947 | p.L625I | c.1873      | 0.136470805 | 0     | 1 |
| 1493 BARD1     | ENST00000260947 | p.S660R | c.1980      | 0.054717438 | 4.311 | 1 |
| 1493 BARD1     | ENST00000260947 | p.G698C | c.2092      | 0.090427889 | 3.538 | 1 |
| 1495 JAK2      | ENST00000539801 | p.I540N | c.1619      | 0.169038195 | 4.668 | 1 |
| 1495 JAK2      | ENST00000539801 | p.R564G | c.1690      | 0.087550345 | 8.291 | 1 |
| 1495 JAK2      | ENST00000539801 | p.V617F | c.1849      | 1.042528878 | 0     | 2 |
| 1496 FDFT1     | ENST00000220584 | p.T368M | c.1103      | 0.010385172 | 9.979 | 1 |
| 1496 FDFT1     | ENST00000220584 | p.D145N | c.433       | 0.187891121 | 2.568 | 1 |
| 1496 FDFT1     | ENST00000220584 | p.R149I | c.446       | 0.215070773 | 3.245 | 1 |
| 1496 FDFT1     | ENST00000220584 | p.Y174C | c.521       | 0.100080429 | 6.846 | 1 |
| 1496 FDFT1     | ENST00000220584 | p.R185H | c.554       | 0.283798252 | 0     | 1 |
| 1497 ARID3A    | ENST00000263620 | p.G284S | c.850       | 0.170400326 | 2.553 | 1 |
| 1497 ARID3A    | ENST00000263620 | p.S333N | c.998       | 0.170400326 | 0     | 1 |
| 1498 ACHE      | ENST00000411582 | p.D341E | c.1023      | 0.052374196 | 5.255 | 1 |
| 1498 ACHE      | ENST00000411582 | p.A238T | c.712       | 0.048697786 | 5.36  | 1 |
| 1498 ACHE      | ENST00000411582 | p.T269M | c.806       | 1.050535991 | 0     | 2 |
| 1499 CRYGS     | ENST00000307944 | p.I138F | c.412       | 0.050119328 | 4.454 | 1 |
| 1499 CRYGS     | ENST00000307944 | p.Y150H | c.448       | 0.102975063 | 3.344 | 1 |
| 1499 CRYGS     | ENST00000307944 | p.R175H | c.524       | 0.144107736 | 0     | 1 |
| 1500 SHH       | ENST00000297261 | p.D83N  | c.247       | 0.016475743 | 9.146 | 1 |
| 1500 SHH       | ENST00000297261 | p.R123W | c.367       | 0.144057061 | 3.059 | 1 |
| 1500 SHH       | ENST00000297261 | p.I148L | c.442       | 0.203866209 | 0     | 1 |
| 1500 SHH       | ENST00000297261 | p.E176K | c.526       | 0.010039507 | 7.915 | 1 |
| 1500 SHH       | ENST00000297261 | p.C183Y | c.548       | 0.087321901 | 3.681 | 1 |
| 1501 NOS2      | ENST00000313735 | p.L542I | c.1624      | 0.044347605 | 4.495 | 1 |
| 1501 NOS2      | ENST00000313735 | p.M572V | c.1714      | 0.044347605 | 0     | 1 |
| 1502 NUP214    | ENST00000451030 | p.D368Y | c.1102      | 0.081616    | 3.71  | 1 |
| 1502 NUP214    | ENST00000451030 | p.A386P | c.1156      | 0.011288519 | 6.469 | 1 |
| 1502 NUP214    | ENST00000451030 | p.P400S | c.1198      | 0.073263296 | 3.877 | 1 |
| 1502 NUP214    | ENST00000451030 | p.L68F  | c.202       | 0.15576585  | 0     | 1 |
| 1503 RIPK2     | ENST00000220751 | p.W118C | c.354       | 0.007577827 | 7.044 | 1 |
| 1503 RIPK2     | ENST00000220751 | p.R123C | c.367       | 0.070560275 | 3.825 | 1 |
| 1503 RIPK2     | ENST00000220751 | p.L294V | c.880       | 0.078138103 | 0     | 1 |
| 1504 NTRK1     | ENST00000524377 | p.R507C | c.1519      | 0.015131778 | 7.021 | 1 |
| 1504 NTRK1     | ENST00000524377 | p.F557Y | c.1670_1671 | 0.083273427 | 3.586 | 1 |
| 1504 NTRK1     | ENST00000524377 | p.V578I | c.1732      | 0.090973031 | 0     | 1 |
| 1505 SPARC     | ENST00000231061 | p.K150R | c.449       | 0.111500258 | 0     | 1 |
| 1505 SPARC     | ENST00000231061 | p.R256P | c.767       | 0.070697364 | 3.884 | 1 |

|               |                 |          |        |             |       |    |
|---------------|-----------------|----------|--------|-------------|-------|----|
| 1505 SPARC    | ENST00000231061 | p.E263K  | c.787  | 0.046731876 | 4.514 | 1  |
| 1506 SPTBN1   | ENST00000356805 | p.W202L  | c.605  | 0.008298119 | 6.913 | 1  |
| 1506 SPTBN1   | ENST00000356805 | p.A230T  | c.688  | 0.01537829  | 0     | 1  |
| 1506 SPTBN1   | ENST00000356805 | p.E254K  | c.760  | 0.007080171 | 7.142 | 1  |
| 1507 COL4A1   | ENST00000375820 | p.W1578R | c.4732 | 0.134051563 | 3.019 | 1  |
| 1507 COL4A1   | ENST00000375820 | p.Y1581H | c.4741 | 0.097316362 | 3.529 | 1  |
| 1507 COL4A1   | ENST00000375820 | p.C1604S | c.4810 | 0.209993936 | 0     | 1  |
| 1508 CRYGB    | ENST00000260988 | p.W69R   | c.205  | 0.193359338 | 0     | 1  |
| 1508 CRYGB    | ENST00000260988 | p.L134I  | c.400  | 0.073651366 | 3.937 | 1  |
| 1508 CRYGB    | ENST00000260988 | p.R141M  | c.422  | 0.136431233 | 2.965 | 1  |
| 1509 PDHX     | ENST00000227868 | p.R189G  | c.565  | 0.006982697 | 0     | 1  |
| 1509 PDHX     | ENST00000227868 | p.I210M  | c.630  | 0.006982697 | 7.162 | 1  |
| 1510 FANCM    | ENST00000267430 | p.R1860H | c.5579 | 0.145517994 | 0     | 1  |
| 1510 FANCM    | ENST00000267430 | p.E1952K | c.5854 | 0.138477776 | 2.864 | 1  |
| 1510 FANCM    | ENST00000267430 | p.N1989H | c.5965 | 0.009282215 | 6.937 | 1  |
| 1511 PMM1     | ENST00000216259 | p.T82M   | c.245  | 0.077481731 | 0     | 1  |
| 1511 PMM1     | ENST00000216259 | p.Y200C  | c.599  | 0.077481731 | 3.69  | 1  |
| 1512 A2M      | ENST00000318602 | p.T1285I | c.3854 | 0.025266844 | 0     | 1  |
| 1512 A2M      | ENST00000318602 | p.P1306Q | c.3917 | 0.009169126 | 6.769 | 1  |
| 1512 A2M      | ENST00000318602 | p.E1311K | c.3931 | 0.016097718 | 5.957 | 1  |
| 1513 PYGL     | ENST00000216392 | p.E89D   | c.267  | 0.138628504 | 4.124 | 1  |
| 1513 PYGL     | ENST00000216392 | p.R243C  | c.727  | 1.057352493 | 0     | 1  |
| 1513 PYGL     | ENST00000216392 | p.R243H  | c.728  | 1.057352493 | 0     | 1  |
| 1514 BROX     | ENST00000340934 | p.P336S  | c.1006 | 0.011784219 | 0     | 1  |
| 1514 BROX     | ENST00000340934 | p.K266N  | c.798  | 0.011784219 | 6.407 | 1  |
| 1515 LDHA     | ENST00000540430 | p.S67G   | c.199  | 0.115501951 | 6.705 | 1  |
| 1515 LDHA     | ENST00000540430 | p.L99V   | c.295  | 0.228239777 | 0     | 1  |
| 1515 LDHA     | ENST00000540430 | p.L101F  | c.301  | 0.018686702 | 9.678 | 1  |
| 1515 LDHA     | ENST00000540430 | p.R200C  | c.598  | 0.106004693 | 3.391 | 1  |
| 1515 LDHA     | ENST00000540430 | p.I281T  | c.842  | 0.040414345 | 6.633 | 1  |
| 1515 LDHA     | ENST00000540430 | p.A286T  | c.856  | 0.227850731 | 3.158 | 1  |
| 1516 LIN28B   | ENST00000345080 | p.E84K   | c.250  | 0.010351636 | 6.738 | 1  |
| 1516 LIN28B   | ENST00000345080 | p.G103A  | c.308  | 0.105949792 | 3.252 | 1  |
| 1516 LIN28B   | ENST00000345080 | p.H33N   | c.97   | 0.114334717 | 0     | 1  |
| 1517 MPO      | ENST00000340482 | p.F637L  | c.1911 | 0.010005936 | 6.643 | 1  |
| 1517 MPO      | ENST00000340482 | p.K703N  | c.2109 | 0.010005936 | 0     | 1  |
| 1518 ITGAX    | ENST00000562522 | p.M400I  | c.1200 | 0.031995216 | 5.966 | 1  |
| 1518 ITGAX    | ENST00000562522 | p.R426C  | c.1276 | 1.035074897 | 0     | 1  |
| 1518 ITGAX    | ENST00000562522 | p.R426S  | c.1276 | 1.035074897 | 0     | 1  |
| 1518 ITGAX    | ENST00000562522 | p.G459W  | c.1375 | 1.019077289 | 6.712 | 1  |
| 1518 ITGAX    | ENST00000562522 | p.G459V  | c.1376 | 1.019077289 | 6.712 | 1  |
| 1519 LILRB2   | ENST00000391749 | p.G138E  | c.413  | 0.061011818 | 8.527 | 1  |
| 1519 LILRB2   | ENST00000391749 | p.L142I  | c.424  | 0.180827275 | 0     | 1  |
| 1519 LILRB2   | ENST00000391749 | p.S182F  | c.545  | 0.112644723 | 3.252 | 1  |
| 1519 LILRB2   | ENST00000391749 | p.V183M  | c.547  | 0.117888029 | 3.773 | 1  |
| 1520 C11orf54 | ENST00000528099 | p.R58I   | c.173  | 0.026556083 | 7.176 | 1  |
| 1520 C11orf54 | ENST00000528099 | p.L95F   | c.283  | 1.006915264 | 0     | 2  |
| 1521 PIK3CA   | ENST00000263967 | p.D725N  | c.2173 | 0.058879648 | 9.378 | 1  |
| 1521 PIK3CA   | ENST00000263967 | p.E726K  | c.2176 | 13.1603819  | 0     | 14 |

|      |         |                 |          |           |             |       |   |
|------|---------|-----------------|----------|-----------|-------------|-------|---|
| 1521 | PIK3CA  | ENST00000263967 | p.R777K  | c.2330    | 2.131071995 | 3.654 | 1 |
| 1521 | PIK3CA  | ENST00000263967 | p.R777M  | c.2330    | 2.131071995 | 3.654 | 1 |
| 1522 | SMAD2   | ENST00000402690 | p.L442V  | c.1324    | 0.083316781 | 5.906 | 1 |
| 1522 | SMAD2   | ENST00000402690 | p.L446V  | c.1336    | 0.188058299 | 4.107 | 1 |
| 1522 | SMAD2   | ENST00000402690 | p.D450N  | c.1348    | 0.196389294 | 5.785 | 1 |
| 1522 | SMAD2   | ENST00000402690 | p.D304G  | c.911     | 0.166215063 | 8.65  | 1 |
| 1522 | SMAD2   | ENST00000402690 | p.P305L  | c.914     | 1.095334637 | 0     | 1 |
| 1522 | SMAD2   | ENST00000402690 | p.P305Q  | c.914     | 1.095334637 | 0     | 1 |
| 1523 | ERBB4   | ENST00000342788 | p.G130E  | c.389     | 0.016194879 | 9.073 | 1 |
| 1523 | ERBB4   | ENST00000342788 | p.D150N  | c.448     | 0.028659691 | 5.919 | 1 |
| 1523 | ERBB4   | ENST00000342788 | p.L155F  | c.463     | 0.145976226 | 2.949 | 1 |
| 1523 | ERBB4   | ENST00000342788 | p.T180A  | c.538     | 0.14788196  | 0     | 1 |
| 1524 | CHI3L1  | ENST00000255409 | p.P124L  | c.371     | 0.142125264 | 2.825 | 1 |
| 1524 | CHI3L1  | ENST00000255409 | p.R128H  | c.383     | 0.008124255 | 7.134 | 1 |
| 1524 | CHI3L1  | ENST00000255409 | p.E160K  | c.478     | 0.148240092 | 0     | 1 |
| 1525 | NAALAD2 | ENST00000534061 | p.Q78H   | c.234     | 0.463294031 | 2.11  | 1 |
| 1525 | NAALAD2 | ENST00000534061 | p.N146S  | c.437     | 1.231647015 | 0     | 2 |
| 1526 | PLA2G4A | ENST00000367466 | p.L570F  | c.1708    | 0.02179287  | 0     | 1 |
| 1526 | PLA2G4A | ENST00000367466 | p.P188H  | c.563     | 0.02179287  | 5.52  | 1 |
| 1527 | VCAM1   | ENST00000294728 | p.R60K   | c.179     | 1.149263375 | 0     | 2 |
| 1527 | VCAM1   | ENST00000294728 | p.E105G  | c.314     | 0.347530615 | 2.839 | 1 |
| 1527 | VCAM1   | ENST00000294728 | p.I27M   | c.81      | 0.087026439 | 6.717 | 1 |
| 1528 | KLK5    | ENST00000391809 | p.P222S  | c.664     | 0.057352493 | 0     | 1 |
| 1528 | KLK5    | ENST00000391809 | p.T276M  | c.827     | 0.057352493 | 4.124 | 1 |
| 1529 | ADH5    | ENST00000296412 | p.H67R   | c.200     | 0.156481454 | 2.696 | 1 |
| 1529 | ADH5    | ENST00000296412 | p.K159N  | c.477     | 0.108974582 | 9.376 | 1 |
| 1529 | ADH5    | ENST00000296412 | p.C174Y  | c.521     | 0.169829515 | 0     | 1 |
| 1529 | ADH5    | ENST00000296412 | p.P329K  | c.986_985 | 0.123634856 | 6.158 | 1 |
| 1530 | ACHE    | ENST00000411582 | p.E481K  | c.1441    | 0.026859758 | 0     | 1 |
| 1530 | ACHE    | ENST00000411582 | p.A504T  | c.1510    | 0.014710601 | 6.087 | 1 |
| 1530 | ACHE    | ENST00000411582 | p.L258M  | c.772     | 0.025170301 | 6.363 | 1 |
| 1531 | BTK     | ENST00000308731 | p.H35N   | c.103     | 0.098508587 | 0     | 1 |
| 1531 | BTK     | ENST00000308731 | p.V131I  | c.391     | 0.033441711 | 4.996 | 1 |
| 1531 | BTK     | ENST00000308731 | p.A2V    | c.5       | 0.069276771 | 3.896 | 1 |
| 1532 | JAK1    | ENST00000342505 | p.R879H  | c.2636    | 0.145617234 | 0     | 1 |
| 1532 | JAK1    | ENST00000342505 | p.F958C  | c.2873    | 0.074443838 | 3.854 | 1 |
| 1532 | JAK1    | ENST00000342505 | p.G962E  | c.2885    | 0.016763561 | 5.995 | 1 |
| 1532 | JAK1    | ENST00000342505 | p.R1139W | c.3415    | 0.020868526 | 5.679 | 1 |
| 1532 | JAK1    | ENST00000342505 | p.S1141C | c.3421    | 0.044116816 | 4.599 | 1 |
| 1533 | ERBB2   | ENST00000269571 | p.D742H  | c.2224    | 0.007259068 | 0     | 1 |
| 1533 | ERBB2   | ENST00000269571 | p.K937R  | c.2810    | 0.007259068 | 7.106 | 1 |
| 1534 | ARG1    | ENST00000356962 | p.S80Y   | c.239     | 0.014690222 | 6.089 | 1 |
| 1534 | ARG1    | ENST00000356962 | p.F170L  | c.510     | 0.014690222 | 0     | 1 |
| 1535 | KCNU1   | ENST00000399881 | p.E970K  | c.2908    | 0.031510987 | 0     | 1 |
| 1535 | KCNU1   | ENST00000399881 | p.P1029T | c.3085    | 0.01508007  | 8.319 | 1 |
| 1535 | KCNU1   | ENST00000399881 | p.C1043F | c.3128    | 0.028379638 | 5.139 | 1 |
| 1536 | ARIH1   | ENST00000379887 | p.T218I  | c.653     | 0.006125316 | 0     | 1 |
| 1536 | ARIH1   | ENST00000379887 | p.I249V  | c.745     | 0.006125316 | 7.351 | 1 |
| 1538 | CHKB    | ENST00000406938 | p.T155N  | c.464     | 0.192305359 | 0     | 1 |

|      |         |                 |          |           |             |       |   |
|------|---------|-----------------|----------|-----------|-------------|-------|---|
| 1538 | CHKB    | ENST00000406938 | p.E283A  | c.848     | 0.081707159 | 3.776 | 1 |
| 1538 | CHKB    | ENST00000406938 | p.Y286H  | c.856     | 0.111026739 | 3.296 | 1 |
| 1538 | CHKB    | ENST00000406938 | p.T289A  | c.865     | 0.020552094 | 5.837 | 1 |
| 1539 | GRIK1   | ENST00000327783 | p.E485K  | c.1453    | 0.019640834 | 5.67  | 1 |
| 1539 | GRIK1   | ENST00000327783 | p.E803D  | c.2409    | 0.019640834 | 0     | 1 |
| 1540 | IGF1R   | ENST00000268035 | p.I364M  | c.1092    | 0.082412101 | 4.601 | 1 |
| 1540 | IGF1R   | ENST00000268035 | p.R365P  | c.1094    | 0.028478165 | 6.134 | 1 |
| 1540 | IGF1R   | ENST00000268035 | p.R391H  | c.1172    | 1.055445133 | 0     | 2 |
| 1541 | EPHA3   | ENST00000336596 | p.E615K  | c.1843    | 0.125433969 | 2.995 | 1 |
| 1541 | EPHA3   | ENST00000336596 | p.K691N  | c.2073    | 0.125433969 | 0     | 1 |
| 1542 | PPIB    | ENST00000300026 | p.F123L  | c.369     | 0.214212372 | 3.054 | 1 |
| 1542 | PPIB    | ENST00000300026 | p.H132Y  | c.394     | 0.067929398 | 4.127 | 1 |
| 1542 | PPIB    | ENST00000300026 | p.T147S  | c.440     | 0.216300872 | 6.905 | 1 |
| 1542 | PPIB    | ENST00000300026 | p.T155M  | c.464     | 0.252462395 | 0     | 1 |
| 1542 | PPIB    | ENST00000300026 | p.M176I  | c.528     | 0.078286096 | 3.911 | 1 |
| 1543 | SF1     | ENST00000377387 | p.V278A  | c.833     | 0.233832325 | 2.795 | 1 |
| 1543 | SF1     | ENST00000377387 | p.G306R  | c.916     | 0.454012718 | 0     | 1 |
| 1543 | SF1     | ENST00000377387 | p.L328F  | c.982     | 0.399673457 | 1.69  | 1 |
| 1544 | LRP6    | ENST00000261349 | p.S114Y  | c.341     | 0.048765343 | 5.358 | 1 |
| 1544 | LRP6    | ENST00000261349 | p.W157F  | c.471_470 | 1.033356877 | 0     | 2 |
| 1544 | LRP6    | ENST00000261349 | p.I181M  | c.543     | 0.017948412 | 6.8   | 1 |
| 1545 | SNRNP70 | ENST00000598441 | p.G127E  | c.380     | 0.001293952 | 0     | 1 |
| 1545 | SNRNP70 | ENST00000598441 | p.R155Q  | c.464     | 0.001293952 | 9.594 | 1 |
| 1546 | TRDMT1  | ENST00000377799 | p.M72I   | c.216     | 0.02071759  | 0     | 1 |
| 1546 | TRDMT1  | ENST00000377799 | p.L117I  | c.349     | 0.02071759  | 5.593 | 1 |
| 1547 | ACHE    | ENST00000411582 | p.R76H   | c.227     | 0.014629254 | 6.095 | 1 |
| 1547 | ACHE    | ENST00000411582 | p.P80S   | c.238     | 0.029543816 | 5.081 | 1 |
| 1547 | ACHE    | ENST00000411582 | p.E197Q  | c.589     | 0.04417307  | 0     | 1 |
| 1548 | P2RY12  | ENST00000302632 | p.L115P  | c.344     | 0.073863222 | 3.759 | 1 |
| 1548 | P2RY12  | ENST00000302632 | p.V205F  | c.613     | 0.073863222 | 0     | 1 |
| 1549 | WWP1    | ENST00000517970 | p.K568Q  | c.1702    | 0.115561488 | 0     | 1 |
| 1549 | WWP1    | ENST00000517970 | p.R595H  | c.1784    | 0.058865492 | 5.428 | 1 |
| 1549 | WWP1    | ENST00000517970 | p.Y597C  | c.1790    | 0.094478342 | 3.437 | 1 |
| 1550 | U2AF2   | ENST00000308924 | p.R150H  | c.449     | 0.032106295 | 0     | 1 |
| 1550 | U2AF2   | ENST00000308924 | p.R227C  | c.679     | 0.032106295 | 4.961 | 1 |
| 1551 | IL5RA   | ENST00000256452 | p.R147K  | c.440     | 0.006992383 | 7.16  | 1 |
| 1551 | IL5RA   | ENST00000256452 | p.R208H  | c.623     | 0.006557262 | 8.669 | 1 |
| 1551 | IL5RA   | ENST00000256452 | p.A264T  | c.790     | 0.00944919  | 0     | 1 |
| 1552 | MAPK1   | ENST00000398822 | p.R172H  | c.515     | 0.063344066 | 4.777 | 1 |
| 1552 | MAPK1   | ENST00000398822 | p.P176S  | c.526     | 0.14728511  | 2.815 | 1 |
| 1552 | MAPK1   | ENST00000398822 | p.G204S  | c.610     | 0.178575812 | 0     | 1 |
| 1553 | C3      | ENST00000245907 | p.R841Q  | c.2522    | 0.263389576 | 8.935 | 1 |
| 1553 | C3      | ENST00000245907 | p.E843K  | c.2527    | 1.052669648 | 0     | 2 |
| 1553 | C3      | ENST00000245907 | p.V932M  | c.2794    | 0.193715396 | 6.199 | 1 |
| 1553 | C3      | ENST00000245907 | p.G935R  | c.2803    | 1.052191778 | 6.4   | 2 |
| 1553 | C3      | ENST00000245907 | p.K1589E | c.4765    | 0.049380516 | 6.229 | 1 |
| 1554 | GRM5    | ENST00000305447 | p.Y478C  | c.1433    | 0.009532035 | 6.713 | 1 |
| 1554 | GRM5    | ENST00000305447 | p.D480A  | c.1439    | 0.010330114 | 6.597 | 1 |
| 1554 | GRM5    | ENST00000305447 | p.Q318H  | c.954     | 0.019862149 | 0     | 1 |

|             |                 |          |             |             |       |   |
|-------------|-----------------|----------|-------------|-------------|-------|---|
| 1555 CD1A   | ENST00000289429 | p.D51N   | c.151       | 0.202172928 | 3.331 | 1 |
| 1555 CD1A   | ENST00000289429 | p.R200W  | c.598       | 0.012630014 | 7.307 | 1 |
| 1555 CD1A   | ENST00000289429 | p.W260R  | c.778       | 1.105688163 | 0     | 2 |
| 1556 FCN1   | ENST00000371806 | p.A218D  | c.653       | 0.195761303 | 6.641 | 1 |
| 1556 FCN1   | ENST00000371806 | p.A244V  | c.731       | 0.253482721 | 6.133 | 1 |
| 1556 FCN1   | ENST00000371806 | p.S247F  | c.740       | 3.144368555 | 0     | 1 |
| 1556 FCN1   | ENST00000371806 | p.S247Y  | c.740       | 3.144368555 | 0     | 3 |
| 1556 FCN1   | ENST00000371806 | p.L248V  | c.742       | 0.164357532 | 6.873 | 1 |
| 1556 FCN1   | ENST00000371806 | p.W306C  | c.918       | 0.742876589 | 3.164 | 1 |
| 1557 CA2    | ENST00000285379 | p.Q92E   | c.274       | 0.180708332 | 3.708 | 1 |
| 1557 CA2    | ENST00000285379 | p.F130L  | c.390       | 0.183791695 | 9.025 | 1 |
| 1557 CA2    | ENST00000285379 | p.G182R  | c.544       | 1.078440596 | 0     | 2 |
| 1558 XIAP   | ENST00000371199 | p.M262I  | c.786       | 0.014367969 | 0     | 1 |
| 1558 XIAP   | ENST00000371199 | p.P312F  | c.934_935   | 0.014367969 | 6.121 | 1 |
| 1559 CFBF   | ENST00000412916 | p.I102N  | c.305       | 1.030289807 | 0     | 1 |
| 1559 CFBF   | ENST00000412916 | p.I102M  | c.306       | 1.030289807 | 0     | 1 |
| 1559 CFBF   | ENST00000412916 | p.A132T  | c.394       | 0.059571379 | 5.192 | 1 |
| 1559 CFBF   | ENST00000412916 | p.Q133H  | c.399       | 0.005867656 | 8.413 | 1 |
| 1560 CBS    | ENST00000352178 | p.L540M  | c.1618      | 0.097523885 | 0     | 1 |
| 1560 CBS    | ENST00000352178 | p.E187D  | c.561       | 0.009685216 | 6.69  | 1 |
| 1560 CBS    | ENST00000352178 | p.E213K  | c.637       | 0.087838669 | 3.509 | 1 |
| 1562 CYP1A1 | ENST00000567032 | p.H51Y   | c.151       | 0.037188491 | 4.749 | 1 |
| 1562 CYP1A1 | ENST00000567032 | p.I78M   | c.234       | 0.037188491 | 0     | 1 |
| 1563 PLAU   | ENST00000372764 | p.C91F   | c.272       | 0.246900215 | 0     | 1 |
| 1563 PLAU   | ENST00000372764 | p.C133F  | c.398       | 0.246900215 | 2.018 | 1 |
| 1564 TLR8   | ENST00000311912 | p.L341I  | c.1021      | 0.088533928 | 3.521 | 1 |
| 1564 TLR8   | ENST00000311912 | p.G348V  | c.1043      | 0.035482469 | 5.936 | 1 |
| 1564 TLR8   | ENST00000311912 | p.I320N  | c.959       | 0.103444829 | 0     | 1 |
| 1565 ACACB  | ENST00000338432 | p.P2045L | c.6134      | 0.009156424 | 6.771 | 1 |
| 1565 ACACB  | ENST00000338432 | p.T2081I | c.6242_6243 | 0.031345602 | 0     | 1 |
| 1565 ACACB  | ENST00000338432 | p.G2126E | c.6377      | 0.022189177 | 5.494 | 1 |
| 1566 KLHL2  | ENST00000514860 | p.N499Y  | c.1495      | 0.036600318 | 4.772 | 1 |
| 1566 KLHL2  | ENST00000514860 | p.G547C  | c.1639      | 0.036600318 | 0     | 1 |
| 1567 IL17RA | ENST00000319363 | p.D387N  | c.1159      | 0.2300607   | 0     | 1 |
| 1567 IL17RA | ENST00000319363 | p.R449C  | c.1345      | 0.093450179 | 3.609 | 1 |
| 1567 IL17RA | ENST00000319363 | p.G450D  | c.1349      | 0.152839242 | 2.834 | 1 |
| 1567 IL17RA | ENST00000319363 | p.V465L  | c.1393      | 0.008963894 | 6.991 | 1 |
| 1568 PIK3CA | ENST00000263967 | p.S629C  | c.1886      | 0.045328063 | 0     | 1 |
| 1568 PIK3CA | ENST00000263967 | p.R818C  | c.2452      | 0.032871931 | 4.927 | 1 |
| 1568 PIK3CA | ENST00000263967 | p.N170S  | c.509       | 0.012456132 | 6.327 | 1 |
| 1569 TXNIP  | ENST00000369317 | p.M171V  | c.511       | 0.008555097 | 6.869 | 1 |
| 1569 TXNIP  | ENST00000369317 | p.R177W  | c.529       | 0.005295564 | 7.561 | 1 |
| 1569 TXNIP  | ENST00000369317 | p.R207L  | c.620       | 0.013850661 | 0     | 1 |
| 1570 CSF2RB | ENST00000406230 | p.E335D  | c.1005      | 0.032084048 | 4.962 | 1 |
| 1570 CSF2RB | ENST00000406230 | p.K336T  | c.1007      | 0.028577034 | 5.129 | 1 |
| 1570 CSF2RB | ENST00000406230 | p.R122W  | c.364       | 0.060661082 | 0     | 1 |
| 1571 C6     | ENST00000263413 | p.S794N  | c.2381      | 0.051259475 | 5.871 | 1 |
| 1571 C6     | ENST00000263413 | p.K817R  | c.2450      | 2.017086492 | 0     | 1 |
| 1571 C6     | ENST00000263413 | p.K817T  | c.2450      | 2.017086492 | 0     | 2 |



|      |          |                 |          |        |             |       |   |
|------|----------|-----------------|----------|--------|-------------|-------|---|
| 1572 | GZMK     | ENST00000231009 | p.V51I   | c.151  | 0.036524289 | 4.775 | 1 |
| 1572 | GZMK     | ENST00000231009 | p.D160E  | c.480  | 0.036524289 | 0     | 1 |
| 1573 | PDE4C    | ENST00000594617 | p.K518N  | c.1554 | 0.149996423 | 2.737 | 1 |
| 1573 | PDE4C    | ENST00000594617 | p.D614N  | c.1840 | 0.149996423 | 0     | 1 |
| 1574 | DICER1   | ENST00000343455 | p.S911I  | c.2732 | 0.034838847 | 5.326 | 1 |
| 1574 | DICER1   | ENST00000343455 | p.R935K  | c.2804 | 0.206298565 | 0     | 1 |
| 1574 | DICER1   | ENST00000343455 | p.A1039D | c.3116 | 0.191278334 | 2.463 | 1 |
| 1575 | MSN      | ENST00000360270 | p.V42A   | c.125  | 0.026950093 | 0     | 1 |
| 1575 | MSN      | ENST00000360270 | p.M285I  | c.855  | 0.010110513 | 6.628 | 1 |
| 1575 | MSN      | ENST00000360270 | p.R293H  | c.878  | 0.01683958  | 5.892 | 1 |
| 1576 | SULT1E1  | ENST00000226444 | p.P114S  | c.340  | 0.020977695 | 5.575 | 1 |
| 1576 | SULT1E1  | ENST00000226444 | p.A115V  | c.344  | 0.009290681 | 6.75  | 1 |
| 1576 | SULT1E1  | ENST00000226444 | p.A32T   | c.94   | 0.030268376 | 0     | 1 |
| 1577 | ACADM    | ENST00000370834 | p.F48C   | c.143  | 1.012056876 | 0     | 2 |
| 1577 | ACADM    | ENST00000370834 | p.L84F   | c.250  | 0.024113753 | 6.374 | 1 |
| 1578 | TXNDC12  | ENST00000371626 | p.C66Y   | c.197  | 0.259714776 | 2.945 | 1 |
| 1578 | TXNDC12  | ENST00000371626 | p.R114Q  | c.341  | 1.129857388 | 0     | 2 |
| 1579 | HIST1H1B | ENST00000331442 | p.T95A   | c.283  | 0.11018502  | 3.182 | 1 |
| 1579 | HIST1H1B | ENST00000331442 | p.P156A  | c.466  | 0.11018502  | 0     | 1 |
| 1580 | ERI1     | ENST00000519292 | p.Q343K  | c.1027 | 0.010679589 | 6.549 | 1 |
| 1580 | ERI1     | ENST00000519292 | p.Q205R  | c.614  | 0.010679589 | 0     | 1 |
| 1581 | PLG      | ENST00000308192 | p.R386Q  | c.1157 | 0.150784707 | 0     | 1 |
| 1581 | PLG      | ENST00000308192 | p.A419V  | c.1256 | 0.13671676  | 2.894 | 1 |
| 1581 | PLG      | ENST00000308192 | p.T422S  | c.1264 | 0.018441436 | 5.943 | 1 |
| 1582 | DYRK2    | ENST00000344096 | p.R191C  | c.571  | 1.04482079  | 0     | 2 |
| 1582 | DYRK2    | ENST00000344096 | p.D216V  | c.647  | 0.112150211 | 5.16  | 1 |
| 1582 | DYRK2    | ENST00000344096 | p.R294H  | c.881  | 0.089913658 | 5.891 | 1 |
| 1583 | TRAPPC6A | ENST00000006275 | p.K81M   | c.242  | 0.066615421 | 3.908 | 1 |
| 1583 | TRAPPC6A | ENST00000006275 | p.P171L  | c.512  | 0.066615421 | 0     | 1 |
| 1584 | CA1      | ENST00000523022 | p.G7R    | c.19   | 1.014377932 | 0     | 1 |
| 1584 | CA1      | ENST00000523022 | p.G7E    | c.20   | 1.014377932 | 0     | 1 |
| 1584 | CA1      | ENST00000523022 | p.P202R  | c.605  | 0.041553312 | 6.12  | 1 |
| 1585 | HGF      | ENST00000222390 | p.C604Y  | c.1811 | 0.02814645  | 0     | 1 |
| 1585 | HGF      | ENST00000222390 | p.M686T  | c.2057 | 0.014477938 | 6.11  | 1 |
| 1585 | HGF      | ENST00000222390 | p.L688I  | c.2062 | 0.013668512 | 6.193 | 1 |
| 1586 | XDH      | ENST00000379416 | p.D386H  | c.1156 | 0.146793617 | 0     | 1 |
| 1586 | XDH      | ENST00000379416 | p.N461T  | c.1382 | 0.05242214  | 4.39  | 1 |
| 1586 | XDH      | ENST00000379416 | p.A466V  | c.1397 | 0.113550136 | 3.335 | 1 |
| 1587 | XDH      | ENST00000379416 | p.R599C  | c.1795 | 1.019491225 | 0     | 1 |
| 1587 | XDH      | ENST00000379416 | p.R599P  | c.1796 | 1.019491225 | 0     | 1 |
| 1587 | XDH      | ENST00000379416 | p.E601K  | c.1801 | 0.162751176 | 9.596 | 1 |
| 1587 | XDH      | ENST00000379416 | p.E603K  | c.1807 | 0.187094217 | 9.566 | 1 |
| 1587 | XDH      | ENST00000379416 | p.I751V  | c.2251 | 0.094669017 | 7.095 | 1 |
| 1587 | XDH      | ENST00000379416 | p.G821V  | c.2462 | 0.342785684 | 6.708 | 1 |
| 1588 | ALDOB    | ENST00000374855 | p.G29R   | c.85   | 0.298300546 | 5.554 | 1 |
| 1588 | ALDOB    | ENST00000374855 | p.F300L  | c.900  | 0.220367501 | 4.234 | 1 |
| 1588 | ALDOB    | ENST00000374855 | p.S301P  | c.901  | 0.339801823 | 2.617 | 1 |
| 1588 | ALDOB    | ENST00000374855 | p.L31M   | c.91   | 0.371405442 | 0     | 1 |
| 1588 | ALDOB    | ENST00000374855 | p.L306M  | c.916  | 0.165781083 | 2.9   | 1 |

|              |                 |          |        |             |       |     |
|--------------|-----------------|----------|--------|-------------|-------|-----|
| 1589 SUPV3L1 | ENST00000359655 | p.H356N  | c.1066 | 0.019478144 | 0     | 1   |
| 1589 SUPV3L1 | ENST00000359655 | p.K495Q  | c.1483 | 0.019478144 | 5.682 | 1   |
| 1590 PHKG2   | ENST00000328273 | p.R44Q   | c.131  | 0.00524079  | 7.576 | 1   |
| 1590 PHKG2   | ENST00000328273 | p.E19K   | c.55   | 0.00524079  | 0     | 1   |
| 1592 IFNAR1  | ENST00000270139 | p.Y303D  | c.907  | 0.035673585 | 0     | 1   |
| 1592 IFNAR1  | ENST00000270139 | p.D325H  | c.973  | 0.035673585 | 4.809 | 1   |
| 1593 MS4A1   | ENST00000345732 | p.L206F  | c.616  | 0.03381952  | 0     | 1   |
| 1593 MS4A1   | ENST00000345732 | p.L230V  | c.688  | 0.03381952  | 4.886 | 1   |
| 1594 GLA     | ENST00000493905 | p.T39M   | c.116  | 0.012917933 | 6.483 | 1   |
| 1594 GLA     | ENST00000493905 | p.D93H   | c.277  | 0.032381487 | 6.669 | 1   |
| 1594 GLA     | ENST00000493905 | p.C172W  | c.516  | 0.176508187 | 0     | 1   |
| 1595 SF1     | ENST00000377387 | p.L190P  | c.569  | 0.134623297 | 0     | 1   |
| 1595 SF1     | ENST00000377387 | p.R227H  | c.680  | 0.134623297 | 2.893 | 1   |
| 1596 EP300   | ENST00000263253 | p.R1737C | c.5209 | 0.016827912 | 0     | 1   |
| 1596 EP300   | ENST00000263253 | p.K1760R | c.5279 | 0.016827912 | 5.893 | 1   |
| 1597 PCSK9   | ENST00000302118 | p.R357H  | c.1070 | 0.076771481 | 6.99  | 1   |
| 1597 PCSK9   | ENST00000302118 | p.A475T  | c.1423 | 0.099952653 | 3.456 | 1   |
| 1597 PCSK9   | ENST00000302118 | p.E498K  | c.1492 | 0.019435219 | 5.811 | 1   |
| 1597 PCSK9   | ENST00000302118 | p.A522V  | c.1565 | 0.116804509 | 0     | 1   |
| 1598 PRKCA   | ENST00000413366 | p.P398Q  | c.1193 | 0.040526236 | 4.625 | 1   |
| 1598 PRKCA   | ENST00000413366 | p.E606K  | c.1816 | 0.040526236 | 0     | 1   |
| 1599 RB1     | ENST00000267163 | p.V654L  | c.1960 | 1.013926726 | 0     | 1   |
| 1599 RB1     | ENST00000267163 | p.V654M  | c.1960 | 1.013926726 | 0     | 1   |
| 1599 RB1     | ENST00000267163 | p.M695V  | c.2083 | 0.0388409   | 6.166 | 1   |
| 1600 HK2     | ENST00000290573 | p.S682N  | c.2045 | 0.13601637  | 0     | 1   |
| 1600 HK2     | ENST00000290573 | p.E742Q  | c.2224 | 0.13057947  | 2.937 | 1   |
| 1600 HK2     | ENST00000290573 | p.D861Y  | c.2581 | 0.01012104  | 7.523 | 1   |
| 1601 A2M     | ENST00000318602 | p.I1091V | c.3271 | 0.09134063  | 3.493 | 1   |
| 1601 A2M     | ENST00000318602 | p.G1094V | c.3281 | 0.030921694 | 5.138 | 1   |
| 1601 A2M     | ENST00000318602 | p.Q1252H | c.3756 | 0.117217569 | 0     | 1   |
| 1602 KCND3   | ENST00000302127 | p.R49G   | c.145  | 0.116833125 | 0     | 1   |
| 1602 KCND3   | ENST00000302127 | p.E81D   | c.243  | 0.006456643 | 7.275 | 1   |
| 1602 KCND3   | ENST00000302127 | p.F83L   | c.249  | 0.023263976 | 6.216 | 1   |
| 1602 KCND3   | ENST00000302127 | p.E89K   | c.265  | 0.098228007 | 3.367 | 1   |
| 1603 MX1     | ENST00000398600 | p.N220S  | c.659  | 0.014649548 | 0     | 1   |
| 1603 MX1     | ENST00000398600 | p.G255E  | c.764  | 0.014649548 | 6.093 | 1   |
| 1604 SUPV3L1 | ENST00000359655 | p.R656Q  | c.1967 | 0.032017401 | 4.965 | 1   |
| 1604 SUPV3L1 | ENST00000359655 | p.R259L  | c.776  | 0.032017401 | 0     | 1   |
| 1605 ACE     | ENST00000290866 | p.P876S  | c.2626 | 1.01906407  | 0     | 2   |
| 1605 ACE     | ENST00000290866 | p.G1099D | c.3296 | 0.050159972 | 5.713 | 1   |
| 1606 IDH1    | ENST00000415913 | p.R109K  | c.326  | 20.17381059 | 3.148 | 1   |
| 1606 IDH1    | ENST00000415913 | p.R132C  | c.394  | 177.1233233 | 0     | 28  |
| 1606 IDH1    | ENST00000415913 | p.R132G  | c.394  | 177.1233233 | 0     | 7   |
| 1606 IDH1    | ENST00000415913 | p.R132S  | c.394  | 177.1233233 | 0     | 5   |
| 1606 IDH1    | ENST00000415913 | p.R132H  | c.395  | 177.1233233 | 0     | 137 |
| 1606 IDH1    | ENST00000415913 | p.R132L  | c.395  | 177.1233233 | 0     | 1   |
| 1606 IDH1    | ENST00000415913 | p.M291I  | c.873  | 1.972091686 | 6.572 | 1   |
| 1607 PIK3R1  | ENST00000274335 | p.P617R  | c.1850 | 0.015282393 | 8.521 | 1   |
| 1607 PIK3R1  | ENST00000274335 | p.G627A  | c.1880 | 0.210055176 | 9.186 | 1   |

|      |         |                 |          |        |             |       |   |
|------|---------|-----------------|----------|--------|-------------|-------|---|
| 1607 | PIK3R1  | ENST00000274335 | p.E635K  | c.1903 | 0.012508168 | 6.604 | 1 |
| 1607 | PIK3R1  | ENST00000274335 | p.R642P  | c.1925 | 0.012284767 | 6.63  | 1 |
| 1607 | PIK3R1  | ENST00000274335 | p.F646S  | c.1937 | 0.235496942 | 2.206 | 1 |
| 1607 | PIK3R1  | ENST00000274335 | p.R649W  | c.1945 | 0.218365166 | 6.923 | 1 |
| 1607 | PIK3R1  | ENST00000274335 | p.V718A  | c.2153 | 0.249790906 | 0     | 1 |
| 1608 | 3-Sep   | ENST00000396426 | p.V67I   | c.199  | 0.011630041 | 7.426 | 1 |
| 1608 | 3-Sep   | ENST00000396426 | p.W139L  | c.416  | 1.005815021 | 0     | 2 |
| 1609 | PTPN1   | ENST00000371621 | p.C231G  | c.691  | 0.03221776  | 0     | 1 |
| 1609 | PTPN1   | ENST00000371621 | p.M3T    | c.8    | 0.03221776  | 4.956 | 1 |
| 1610 | OPRK1   | ENST00000265572 | p.F143L  | c.429  | 0.109658635 | 4.265 | 1 |
| 1610 | OPRK1   | ENST00000265572 | p.F147V  | c.439  | 0.232475685 | 2.178 | 1 |
| 1610 | OPRK1   | ENST00000265572 | p.S186L  | c.557  | 0.275333129 | 0     | 1 |
| 1610 | OPRK1   | ENST00000265572 | p.F283S  | c.848  | 0.073674744 | 8.74  | 1 |
| 1611 | B3GAT3  | ENST00000265471 | p.H154Y  | c.460  | 1.020095273 | 0     | 2 |
| 1611 | B3GAT3  | ENST00000265471 | p.R277W  | c.829  | 0.040190546 | 5.637 | 1 |
| 1612 | ADORA2A | ENST00000337539 | p.P215S  | c.643  | 0.22203533  | 0     | 1 |
| 1612 | ADORA2A | ENST00000337539 | p.R293P  | c.878  | 0.215168436 | 2.229 | 1 |
| 1612 | ADORA2A | ENST00000337539 | p.K301N  | c.903  | 0.010590717 | 6.84  | 1 |
| 1613 | CYP2C8  | ENST00000371270 | p.V366M  | c.1096 | 0.036982844 | 4.757 | 1 |
| 1613 | CYP2C8  | ENST00000371270 | p.M388L  | c.1162 | 0.061113317 | 0     | 1 |
| 1613 | CYP2C8  | ENST00000371270 | p.H78Y   | c.232  | 0.024130473 | 5.373 | 1 |
| 1614 | VAV1    | ENST00000602142 | p.L666P  | c.1997 | 0.394206664 | 0     | 1 |
| 1614 | VAV1    | ENST00000602142 | p.R688H  | c.2063 | 0.171853975 | 3.035 | 1 |
| 1614 | VAV1    | ENST00000602142 | p.G691R  | c.2071 | 0.022398532 | 7.072 | 1 |
| 1614 | VAV1    | ENST00000602142 | p.R696W  | c.2086 | 0.044689302 | 6.407 | 1 |
| 1614 | VAV1    | ENST00000602142 | p.V715I  | c.2143 | 0.033578155 | 8.846 | 1 |
| 1614 | VAV1    | ENST00000602142 | p.T739A  | c.2215 | 0.252381645 | 2.436 | 1 |
| 1614 | VAV1    | ENST00000602142 | p.Q747H  | c.2241 | 0.086272081 | 3.921 | 1 |
| 1615 | TRIM69  | ENST00000329464 | p.S147Y  | c.440  | 0.003452842 | 8.178 | 1 |
| 1615 | TRIM69  | ENST00000329464 | p.K148R  | c.443  | 0.006900899 | 7.179 | 1 |
| 1615 | TRIM69  | ENST00000329464 | p.E149K  | c.445  | 0.003448059 | 8.18  | 1 |
| 1615 | TRIM69  | ENST00000329464 | p.L270F  | c.808  | 0.013801799 | 0     | 1 |
| 1616 | GSTK1   | ENST00000479303 | p.E93Q   | c.277  | 0.004825854 | 0     | 1 |
| 1616 | GSTK1   | ENST00000479303 | p.R124C  | c.370  | 0.004825854 | 7.695 | 1 |
| 1617 | C3      | ENST00000245907 | p.R951C  | c.2851 | 0.074628201 | 7.191 | 1 |
| 1617 | C3      | ENST00000245907 | p.E992K  | c.2974 | 1.189660055 | 0     | 1 |
| 1617 | C3      | ENST00000245907 | p.E992D  | c.2976 | 1.189660055 | 0     | 1 |
| 1617 | C3      | ENST00000245907 | p.A994G  | c.2981 | 0.133125666 | 9.972 | 1 |
| 1617 | C3      | ENST00000245907 | p.A1024T | c.3070 | 0.112373863 | 6.369 | 1 |
| 1617 | C3      | ENST00000245907 | p.D1115H | c.3343 | 0.1411186   | 5.962 | 1 |
| 1617 | C3      | ENST00000245907 | p.R1254H | c.3761 | 0.458137464 | 2.702 | 1 |
| 1618 | SH3KBP1 | ENST00000397821 | p.R102Q  | c.305  | 0.359484133 | 0     | 1 |
| 1618 | SH3KBP1 | ENST00000397821 | p.E126D  | c.378  | 0.359484133 | 1.476 | 1 |
| 1619 | RBP2    | ENST00000232217 | p.R81Q   | c.242  | 0.024348893 | 5.36  | 1 |
| 1619 | RBP2    | ENST00000232217 | p.A23S   | c.67   | 0.024348893 | 0     | 1 |
| 1620 | EIF2B1  | ENST00000424014 | p.R103G  | c.307  | 0.005737288 | 0     | 1 |
| 1620 | EIF2B1  | ENST00000424014 | p.R147Q  | c.440  | 0.004610056 | 7.761 | 1 |
| 1620 | EIF2B1  | ENST00000424014 | p.R28P   | c.83   | 0.001127232 | 9.793 | 1 |
| 1621 | FSCN1   | ENST00000382361 | p.P140S  | c.418  | 0.041714132 | 0     | 1 |

|               |                 |          |        |             |       |   |
|---------------|-----------------|----------|--------|-------------|-------|---|
| 1621 FSCN1    | ENST00000382361 | p.A180V  | c.539  | 0.034172983 | 4.871 | 1 |
| 1621 FSCN1    | ENST00000382361 | p.Q189H  | c.567  | 0.007541149 | 7.051 | 1 |
| 1622 ME1      | ENST00000369705 | p.E83K   | c.247  | 1.122597375 | 0     | 2 |
| 1622 ME1      | ENST00000369705 | p.P22T   | c.64   | 0.251470485 | 3.028 | 1 |
| 1623 MEMO1    | ENST00000379383 | p.R107L  | c.320  | 0.110792052 | 0     | 1 |
| 1623 MEMO1    | ENST00000379383 | p.H150R  | c.449  | 0.007198939 | 7.118 | 1 |
| 1623 MEMO1    | ENST00000379383 | p.D152A  | c.455  | 0.109714185 | 3.271 | 1 |
| 1624 CWC27    | ENST00000381070 | p.G65C   | c.193  | 0.038101722 | 4.714 | 1 |
| 1624 CWC27    | ENST00000381070 | p.S111I  | c.332  | 0.038101722 | 0     | 1 |
| 1625 SERPINA1 | ENST00000448921 | p.V361A  | c.1082 | 0.320782218 | 2.505 | 1 |
| 1625 SERPINA1 | ENST00000448921 | p.S383Y  | c.1148 | 0.025108038 | 8.14  | 1 |
| 1625 SERPINA1 | ENST00000448921 | p.L407V  | c.1219 | 0.029772707 | 6.307 | 1 |
| 1625 SERPINA1 | ENST00000448921 | p.G410R  | c.1228 | 0.112128203 | 3.615 | 1 |
| 1625 SERPINA1 | ENST00000448921 | p.F75L   | c.225  | 0.459008004 | 0     | 1 |
| 1625 SERPINA1 | ENST00000448921 | p.G319V  | c.956  | 0.34725686  | 2.434 | 1 |
| 1626 ETFA     | ENST00000557943 | p.R209Q  | c.626  | 0.096388177 | 0     | 1 |
| 1626 ETFA     | ENST00000557943 | p.A243S  | c.727  | 0.096388177 | 3.375 | 1 |
| 1627 LIG4     | ENST00000356922 | p.E427D  | c.1281 | 0.088572337 | 3.497 | 1 |
| 1627 LIG4     | ENST00000356922 | p.R580G  | c.1738 | 0.088572337 | 0     | 1 |
| 1628 NR5A2    | ENST00000367362 | p.G108R  | c.322  | 1.020291228 | 0     | 1 |
| 1628 NR5A2    | ENST00000367362 | p.G108E  | c.323  | 1.020291228 | 0     | 1 |
| 1628 NR5A2    | ENST00000367362 | p.R142H  | c.425  | 1.020291228 | 6.623 | 2 |
| 1629 PYCARD   | ENST00000247470 | p.H118N  | c.352  | 0.024627903 | 0     | 1 |
| 1629 PYCARD   | ENST00000247470 | p.R160W  | c.478  | 0.006963363 | 7.166 | 1 |
| 1629 PYCARD   | ENST00000247470 | p.S195G  | c.583  | 0.01766454  | 5.823 | 1 |
| 1630 PTGIS    | ENST00000244043 | p.V403I  | c.1207 | 0.013048249 | 6.26  | 1 |
| 1630 PTGIS    | ENST00000244043 | p.N302S  | c.905  | 0.013048249 | 0     | 1 |
| 1631 HNF4A    | ENST00000316099 | p.H92N   | c.274  | 0.019458796 | 7.5   | 1 |
| 1631 HNF4A    | ENST00000316099 | p.Y94C   | c.281  | 0.052517059 | 5.429 | 1 |
| 1631 HNF4A    | ENST00000316099 | p.R113G  | c.337  | 0.134848654 | 3.019 | 1 |
| 1631 HNF4A    | ENST00000316099 | p.D135N  | c.403  | 0.152100604 | 0     | 1 |
| 1632 PTPRF    | ENST00000359947 | p.C1460W | c.4380 | 0.106505512 | 0     | 1 |
| 1632 PTPRF    | ENST00000359947 | p.R1507H | c.4520 | 0.106505512 | 3.231 | 1 |
| 1633 SYT1     | ENST00000393240 | p.P338S  | c.1012 | 0.134218014 | 0     | 1 |
| 1633 SYT1     | ENST00000393240 | p.D276N  | c.826  | 0.039798011 | 4.786 | 1 |
| 1633 SYT1     | ENST00000393240 | p.I277T  | c.830  | 0.05321351  | 4.35  | 1 |
| 1633 SYT1     | ENST00000393240 | p.L295M  | c.883  | 0.053107955 | 4.353 | 1 |
| 1634 IQGAP1   | ENST00000268182 | p.E1043D | c.3129 | 0.024654589 | 0     | 1 |
| 1634 IQGAP1   | ENST00000268182 | p.R1194Q | c.3581 | 0.024654589 | 5.342 | 1 |
| 1635 DBI      | ENST00000542275 | p.E73K   | c.217  | 1.183244668 | 0     | 2 |
| 1635 DBI      | ENST00000542275 | p.E73K   | c.217  | 0.089770457 | 7.372 | 1 |
| 1635 DBI      | ENST00000542275 | p.A134G  | c.401  | 0.240822256 | 3.686 | 1 |
| 1635 DBI      | ENST00000542275 | p.G147V  | c.440  | 0.206753717 | 3.329 | 1 |
| 1637 CSNK2B   | ENST00000375866 | p.L89F   | c.265  | 0.017898717 | 0     | 1 |
| 1637 CSNK2B   | ENST00000375866 | p.G160S  | c.478  | 0.017898717 | 5.804 | 1 |
| 1638 IFNB1    | ENST00000380232 | p.E74K   | c.220  | 0.140053295 | 6.026 | 1 |
| 1638 IFNB1    | ENST00000380232 | p.A76T   | c.226  | 0.049586319 | 7.234 | 1 |
| 1638 IFNB1    | ENST00000380232 | p.G135E  | c.404  | 1.021988698 | 0     | 1 |
| 1638 IFNB1    | ENST00000380232 | p.G135V  | c.404  | 1.021988698 | 0     | 1 |

|      |        |                 |                   |           |             |       |    |
|------|--------|-----------------|-------------------|-----------|-------------|-------|----|
| 1639 | EPHB1  | ENST00000398015 | p.V437I           | c.1309    | 0.044809896 | 4.623 | 1  |
| 1639 | EPHB1  | ENST00000398015 | p.P438S           | c.1312    | 0.003961667 | 8.604 | 1  |
| 1639 | EPHB1  | ENST00000398015 | p.I439M           | c.1317    | 0.001259442 | 9.633 | 1  |
| 1639 | EPHB1  | ENST00000398015 | p.P460T           | c.1378    | 0.008181991 | 8.608 | 1  |
| 1639 | EPHB1  | ENST00000398015 | p.R90C            | c.268     | 0.046974839 | 0     | 1  |
| 1640 | CECR1  | ENST00000262607 | p.K401N           | c.1203    | 0.008906041 | 6.811 | 1  |
| 1640 | CECR1  | ENST00000262607 | p.Y482H           | c.1444    | 0.008906041 | 0     | 1  |
| 1641 | PDCD6  | ENST00000264933 | p.E47K            | c.139     | 0.006838995 | 0     | 1  |
| 1641 | PDCD6  | ENST00000264933 | p.G79S            | c.235     | 0.006838995 | 7.192 | 1  |
| 1642 | AXL    | ENST00000301178 | p.P168S           | c.502     | 0.057471878 | 4.121 | 1  |
| 1642 | AXL    | ENST00000301178 | p.R190H           | c.569     | 0.057471878 | 0     | 1  |
| 1643 | UBE2Q1 | ENST00000292211 | p.S401P           | c.1201    | 0.002090408 | 8.902 | 1  |
| 1643 | UBE2Q1 | ENST00000292211 | p.R333S           | c.999     | 0.002090408 | 0     | 1  |
| 1645 | IL1R2  | ENST00000332549 | p.Q140H           | c.420     | 0.149834582 | 2.889 | 1  |
| 1645 | IL1R2  | ENST00000332549 | p.I141N           | c.422     | 0.106367224 | 3.429 | 1  |
| 1645 | IL1R2  | ENST00000332549 | p.Y204C           | c.611     | 0.016643615 | 6.557 | 1  |
| 1645 | IL1R2  | ENST00000332549 | p.R227H           | c.680     | 0.238464661 | 0     | 1  |
| 1646 | TP63   | ENST00000264731 | p.R343Q           | c.1028    | 0.058842425 | 0     | 1  |
| 1646 | TP63   | ENST00000264731 | p.M316I           | c.948     | 0.049343368 | 4.341 | 1  |
| 1646 | TP63   | ENST00000264731 | p.R319L           | c.956     | 0.009499057 | 6.718 | 1  |
| 1647 | APTX   | ENST00000463596 | p.A217T           | c.649     | 0.103296146 | 3.404 | 1  |
| 1647 | APTX   | ENST00000463596 | p.R218S           | c.654     | 0.102254228 | 3.42  | 1  |
| 1647 | APTX   | ENST00000463596 | p.G301R           | c.901     | 0.187898074 | 0     | 1  |
| 1648 | NT5E   | ENST00000257770 | p.I343V           | c.1027    | 0.033660803 | 5.075 | 1  |
| 1648 | NT5E   | ENST00000257770 | p.Y345C           | c.1034    | 0.138617158 | 2.893 | 1  |
| 1648 | NT5E   | ENST00000257770 | p.R480Q           | c.1439    | 0.164290238 | 0     | 1  |
| 1649 | NMT1   | ENST00000592782 | p.T363M           | c.1088    | 0.00915008  | 0     | 1  |
| 1649 | NMT1   | ENST00000592782 | p.M456V           | c.1366    | 0.00915008  | 6.772 | 1  |
| 1650 | DDX3X  | ENST00000399959 | p.S412F           | c.1235    | 1.059843949 | 0     | 2  |
| 1650 | DDX3X  | ENST00000399959 | p.R528C           | c.1582    | 1.055627751 | 6.245 | 1  |
| 1650 | DDX3X  | ENST00000399959 | p.R528H           | c.1583    | 1.055627751 | 6.245 | 1  |
| 1650 | DDX3X  | ENST00000399959 | p.D558H           | c.1672    | 0.089018008 | 6.035 | 1  |
| 1650 | DDX3X  | ENST00000399959 | p.P568L           | c.1703    | 0.036448418 | 5.778 | 1  |
| 1651 | DKK1   | ENST00000373970 | p.Q184H           | c.552     | 0.019464647 | 5.683 | 1  |
| 1651 | DKK1   | ENST00000373970 | p.C189S           | c.566     | 0.01674646  | 5.9   | 1  |
| 1651 | DKK1   | ENST00000373970 | p.K211T           | c.632     | 0.066817992 | 0     | 1  |
| 1651 | DKK1   | ENST00000373970 | p.I233V           | c.697     | 0.042060921 | 5.03  | 1  |
| 1652 | AZGP1  | ENST00000292401 | p.D55G            | c.164     | 0.094764722 | 3.434 | 1  |
| 1652 | AZGP1  | ENST00000292401 | p.D86in_frame_del | c.258_256 | 0.042762615 | 9.951 | 1  |
| 1652 | AZGP1  | ENST00000292401 | p.A178V           | c.533     | 0.068188676 | 5.369 | 1  |
| 1652 | AZGP1  | ENST00000292401 | p.R27H            | c.80      | 0.117733601 | 0     | 1  |
| 1653 | HRAS   | ENST00000311189 | p.A59T            | c.175     | 1.124093262 | 5.706 | 1  |
| 1653 | HRAS   | ENST00000311189 | p.Q61K            | c.181     | 18.44203447 | 0     | 5  |
| 1653 | HRAS   | ENST00000311189 | p.Q61L            | c.182     | 18.44203447 | 0     | 2  |
| 1653 | HRAS   | ENST00000311189 | p.Q61R            | c.182     | 18.44203447 | 0     | 10 |
| 1653 | HRAS   | ENST00000311189 | p.A11D            | c.32      | 2.346200201 | 3.055 | 1  |
| 1653 | HRAS   | ENST00000311189 | p.G12C            | c.34      | 10.90356124 | 2.214 | 1  |
| 1653 | HRAS   | ENST00000311189 | p.G12S            | c.34      | 10.90356124 | 2.214 | 2  |
| 1653 | HRAS   | ENST00000311189 | p.G12A            | c.35      | 10.90356124 | 2.214 | 1  |

|      |           |                 |          |        |             |       |   |
|------|-----------|-----------------|----------|--------|-------------|-------|---|
| 1653 | HRAS      | ENST00000311189 | p.G12D   | c.35   | 10.90356124 | 2.214 | 4 |
| 1653 | HRAS      | ENST00000311189 | p.G13C   | c.37   | 9.154840729 | 4.032 | 1 |
| 1653 | HRAS      | ENST00000311189 | p.G13R   | c.37   | 9.154840729 | 4.032 | 3 |
| 1653 | HRAS      | ENST00000311189 | p.G13S   | c.37   | 9.154840729 | 4.032 | 1 |
| 1653 | HRAS      | ENST00000311189 | p.G13D   | c.38   | 9.154840729 | 4.032 | 1 |
| 1653 | HRAS      | ENST00000311189 | p.G13V   | c.38   | 9.154840729 | 4.032 | 3 |
| 1653 | HRAS      | ENST00000311189 | p.D33N   | c.97   | 0.598317025 | 5.153 | 1 |
| 1654 | ESYT2     | ENST00000251527 | p.D385H  | c.1153 | 0.274082684 | 0     | 1 |
| 1654 | ESYT2     | ENST00000251527 | p.P408A  | c.1222 | 0.019663401 | 6     | 1 |
| 1654 | ESYT2     | ENST00000251527 | p.D432N  | c.1294 | 0.262496085 | 1.952 | 1 |
| 1655 | SERPINA12 | ENST00000556881 | p.A356T  | c.1066 | 0.006973023 | 0     | 1 |
| 1655 | SERPINA12 | ENST00000556881 | p.P76S   | c.226  | 0.006973023 | 7.164 | 1 |
| 1656 | IL18      | ENST00000528832 | p.D71V   | c.212  | 0.14569265  | 2.779 | 1 |
| 1656 | IL18      | ENST00000528832 | p.E192K  | c.574  | 0.14569265  | 0     | 1 |
| 1657 | PLK1      | ENST00000300093 | p.P220A  | c.658  | 0.093356216 | 9.139 | 1 |
| 1657 | PLK1      | ENST00000300093 | p.D233G  | c.698  | 1.043316646 | 0     | 2 |
| 1657 | PLK1      | ENST00000300093 | p.R293H  | c.878  | 0.129308858 | 5.662 | 1 |
| 1657 | PLK1      | ENST00000300093 | p.I296N  | c.887  | 0.063063883 | 5.52  | 1 |
| 1658 | IL33      | ENST00000381434 | p.L126I  | c.376  | 0.02568865  | 7.699 | 1 |
| 1658 | IL33      | ENST00000381434 | p.I145V  | c.433  | 0.073265351 | 4.07  | 1 |
| 1658 | IL33      | ENST00000381434 | p.V147D  | c.440  | 0.265127413 | 2.117 | 1 |
| 1658 | IL33      | ENST00000381434 | p.N245Y  | c.733  | 0.294878147 | 0     | 1 |
| 1659 | NLRP1     | ENST00000572272 | p.I1390T | c.4169 | 0.106137031 | 3.236 | 1 |
| 1659 | NLRP1     | ENST00000572272 | p.P1423H | c.4268 | 0.106137031 | 0     | 1 |
| 1660 | ACSM2A    | ENST00000424070 | p.A156G  | c.467  | 0.044435548 | 4.705 | 1 |
| 1660 | ACSM2A    | ENST00000424070 | p.R178I  | c.533  | 0.197322091 | 0     | 1 |
| 1661 | PLA2G7    | ENST00000274793 | p.D238H  | c.712  | 0.037034149 | 0     | 1 |
| 1661 | PLA2G7    | ENST00000274793 | p.R264M  | c.791  | 0.037034149 | 4.755 | 1 |
| 1662 | GBA       | ENST00000327247 | p.P358S  | c.1072 | 0.109877818 | 3.366 | 1 |
| 1662 | GBA       | ENST00000327247 | p.S403R  | c.1209 | 0.027642044 | 8.517 | 1 |
| 1662 | GBA       | ENST00000327247 | p.G103A  | c.308  | 0.147374442 | 3.19  | 1 |
| 1662 | GBA       | ENST00000327247 | p.A139S  | c.415  | 0.209296851 | 0     | 1 |
| 1663 | CUL1      | ENST00000602748 | p.E241Q  | c.721  | 1.018800148 | 0     | 1 |
| 1663 | CUL1      | ENST00000602748 | p.E241D  | c.723  | 1.018800148 | 0     | 1 |
| 1663 | CUL1      | ENST00000602748 | p.E286K  | c.856  | 0.020760716 | 6.59  | 1 |
| 1663 | CUL1      | ENST00000602748 | p.R289K  | c.866  | 0.01683958  | 6.892 | 1 |
| 1664 | KLHL40    | ENST00000287777 | p.V355F  | c.1063 | 0.048562954 | 4.364 | 1 |
| 1664 | KLHL40    | ENST00000287777 | p.V611L  | c.1831 | 0.048562954 | 0     | 1 |
| 1665 | KDR       | ENST00000263923 | p.D832N  | c.2494 | 1.01127288  | 0     | 1 |
| 1665 | KDR       | ENST00000263923 | p.D832Y  | c.2494 | 1.01127288  | 0     | 1 |
| 1665 | KDR       | ENST00000263923 | p.R863M  | c.2588 | 0.034023641 | 6.471 | 1 |
| 1666 | RRAGC     | ENST00000373001 | p.Q192H  | c.576  | 0.081164913 | 0     | 1 |
| 1666 | RRAGC     | ENST00000373001 | p.L217R  | c.650  | 0.081164913 | 3.623 | 1 |
| 1667 | GINS3     | ENST00000426538 | p.V34M   | c.100  | 0.109045338 | 0     | 1 |
| 1667 | GINS3     | ENST00000426538 | p.L107P  | c.320  | 0.109045338 | 3.197 | 1 |
| 1668 | MUT       | ENST00000274813 | p.A376S  | c.1126 | 0.02110897  | 5.566 | 1 |
| 1668 | MUT       | ENST00000274813 | p.N314K  | c.942  | 0.02110897  | 0     | 1 |
| 1669 | RAB11B    | ENST00000328024 | p.A84T   | c.250  | 0.167589074 | 2.577 | 1 |
| 1669 | RAB11B    | ENST00000328024 | p.D114Y  | c.340  | 0.167589074 | 0     | 1 |

|                |                 |          |        |             |       |   |
|----------------|-----------------|----------|--------|-------------|-------|---|
| 1670 DUSP10    | ENST00000323825 | p.R42W   | c.124  | 0.106611106 | 3.34  | 1 |
| 1670 DUSP10    | ENST00000323825 | p.M82I   | c.246  | 0.087405625 | 3.652 | 1 |
| 1670 DUSP10    | ENST00000323825 | p.F116L  | c.346  | 0.178304847 | 0     | 1 |
| 1671 TUBG1     | ENST00000251413 | p.E20Q   | c.58   | 0.014268723 | 6.131 | 1 |
| 1671 TUBG1     | ENST00000251413 | p.F225L  | c.675  | 0.014268723 | 0     | 1 |
| 1672 ALOX15B   | ENST00000380183 | p.E50D   | c.150  | 0.071893243 | 3.798 | 1 |
| 1672 ALOX15B   | ENST00000380183 | p.T10A   | c.28   | 0.071893243 | 0     | 1 |
| 1673 ZFYVE9    | ENST00000371591 | p.R1365C | c.4093 | 0.145390005 | 0     | 1 |
| 1673 ZFYVE9    | ENST00000371591 | p.E1415Q | c.4243 | 0.145390005 | 2.782 | 1 |
| 1674 NRP2      | ENST00000360409 | p.R334H  | c.1001 | 0.01067219  | 6.55  | 1 |
| 1674 NRP2      | ENST00000360409 | p.R239G  | c.715  | 0.01067219  | 0     | 1 |
| 1675 RGS1      | ENST00000367459 | p.Q96K   | c.286  | 0.038386585 | 0     | 1 |
| 1675 RGS1      | ENST00000367459 | p.E134Q  | c.400  | 0.030944795 | 5.249 | 1 |
| 1675 RGS1      | ENST00000367459 | p.T169P  | c.505  | 0.033147622 | 6.37  | 1 |
| 1676 HIST1H2BK | ENST00000356950 | p.R73H   | c.218  | 0.000984037 | 0     | 1 |
| 1676 HIST1H2BK | ENST00000356950 | p.E114K  | c.340  | 0.000984037 | 9.989 | 1 |
| 1677 ADSSL1    | ENST00000332972 | p.P354H  | c.1061 | 0.022639721 | 5.465 | 1 |
| 1677 ADSSL1    | ENST00000332972 | p.F432I  | c.1294 | 0.022639721 | 0     | 1 |
| 1678 PDE4B     | ENST00000341517 | p.V403M  | c.1207 | 0.111455592 | 0     | 1 |
| 1678 PDE4B     | ENST00000341517 | p.H450Y  | c.1348 | 0.086112382 | 3.577 | 1 |
| 1678 PDE4B     | ENST00000341517 | p.R581H  | c.1742 | 0.038398691 | 5.176 | 1 |
| 1679 SARS      | ENST00000369923 | p.R47S   | c.141  | 0.009074287 | 0     | 1 |
| 1679 SARS      | ENST00000369923 | p.D118E  | c.354  | 0.009074287 | 6.784 | 1 |
| 1680 HS3ST5    | ENST00000312719 | p.L343F  | c.1029 | 0.152406887 | 3.714 | 1 |
| 1680 HS3ST5    | ENST00000312719 | p.D254H  | c.760  | 1.076203443 | 0     | 1 |
| 1680 HS3ST5    | ENST00000312719 | p.D254N  | c.760  | 1.076203443 | 0     | 1 |
| 1681 UBE3A     | ENST00000397954 | p.R506I  | c.1517 | 0.139081265 | 0     | 1 |
| 1681 UBE3A     | ENST00000397954 | p.R539L  | c.1616 | 0.139081265 | 2.846 | 1 |
| 1682 VAV2      | ENST00000371850 | p.A821S  | c.2461 | 0.348930709 | 0     | 1 |
| 1682 VAV2      | ENST00000371850 | p.V842L  | c.2524 | 0.204177411 | 2.525 | 1 |
| 1682 VAV2      | ENST00000371850 | p.E874K  | c.2620 | 0.205628565 | 2.513 | 1 |
| 1683 PRKCH     | ENST00000332981 | p.R449H  | c.1346 | 0.026935432 | 5.443 | 1 |
| 1683 PRKCH     | ENST00000332981 | p.R450C  | c.1348 | 0.188888809 | 3.634 | 1 |
| 1683 PRKCH     | ENST00000332981 | p.R455Q  | c.1364 | 0.025429537 | 5.526 | 1 |
| 1683 PRKCH     | ENST00000332981 | p.A456T  | c.1366 | 0.176216786 | 3.455 | 1 |
| 1683 PRKCH     | ENST00000332981 | p.M547I  | c.1641 | 0.224272274 | 0     | 1 |
| 1683 PRKCH     | ENST00000332981 | p.L548F  | c.1642 | 0.178848306 | 6.994 | 1 |
| 1684 EXO1      | ENST00000348581 | p.D143Y  | c.427  | 0.007427024 | 7.073 | 1 |
| 1684 EXO1      | ENST00000348581 | p.A151V  | c.452  | 0.015766432 | 5.987 | 1 |
| 1684 EXO1      | ENST00000348581 | p.T31A   | c.91   | 0.023193456 | 0     | 1 |
| 1685 CEACAM8   | ENST00000244336 | p.E47K   | c.139  | 0.247071413 | 3.017 | 1 |
| 1685 CEACAM8   | ENST00000244336 | p.P142S  | c.424  | 1.123535706 | 0     | 2 |
| 1686 RBM25     | ENST00000527432 | p.V798I  | c.2392 | 0.003377099 | 8.21  | 1 |
| 1686 RBM25     | ENST00000527432 | p.F822C  | c.2465 | 0.003377099 | 0     | 1 |
| 1687 CYP2C9    | ENST00000260682 | p.R433W  | c.1297 | 0.023179608 | 5.431 | 1 |
| 1687 CYP2C9    | ENST00000260682 | p.G117E  | c.350  | 0.023179608 | 0     | 1 |
| 1688 FBP2      | ENST00000375337 | p.E281K  | c.841  | 0.010166733 | 6.62  | 1 |
| 1688 FBP2      | ENST00000375337 | p.R314Q  | c.941  | 0.010166733 | 0     | 1 |
| 1689 TRDMT1    | ENST00000377999 | p.R371H  | c.1112 | 0.082469244 | 3.6   | 1 |

|             |                 |         |           |             |       |   |
|-------------|-----------------|---------|-----------|-------------|-------|---|
| 1689 TRDMT1 | ENST00000377799 | p.K295N | c.885     | 0.082469244 | 0     | 1 |
| 1690 IL5RA  | ENST00000256452 | p.L47I  | c.139     | 2.002605905 | 0     | 3 |
| 1690 IL5RA  | ENST00000256452 | p.A116S | c.346     | 0.010626184 | 8.584 | 1 |
| 1691 GRM7   | ENST00000467425 | p.A125T | c.373     | 0.020803931 | 0     | 1 |
| 1691 GRM7   | ENST00000467425 | p.P147L | c.440     | 0.020803931 | 5.587 | 1 |
| 1692 RYR2   | ENST00000360064 | p.Q386K | c.1156    | 0.193650609 | 3.081 | 1 |
| 1692 RYR2   | ENST00000360064 | p.R387H | c.1160    | 0.130369896 | 3.458 | 1 |
| 1692 RYR2   | ENST00000360064 | p.V245F | c.733     | 0.031223697 | 9.594 | 1 |
| 1692 RYR2   | ENST00000360064 | p.H259Y | c.775     | 0.216823089 | 0     | 1 |
| 1692 RYR2   | ENST00000360064 | p.E261K | c.781     | 0.088743242 | 7.298 | 1 |
| 1693 CECR1  | ENST00000262607 | p.G142R | c.424     | 1.014032954 | 0     | 2 |
| 1693 CECR1  | ENST00000262607 | p.N185H | c.553_552 | 0.107398885 | 6.268 | 1 |
| 1693 CECR1  | ENST00000262607 | p.I210N | c.629     | 0.083560417 | 9.886 | 1 |
| 1694 ANXA6  | ENST00000354546 | p.A605T | c.1813    | 0.008614603 | 0     | 1 |
| 1694 ANXA6  | ENST00000354546 | p.L260I | c.778     | 0.008614603 | 6.859 | 1 |
| 1695 POR    | ENST00000447222 | p.R397L | c.1190    | 0.024281477 | 5.364 | 1 |
| 1695 POR    | ENST00000447222 | p.P421L | c.1262    | 0.024281477 | 0     | 1 |
| 1696 PDK3   | ENST00000441463 | p.R378H | c.1133    | 0.011595396 | 6.582 | 1 |
| 1696 PDK3   | ENST00000441463 | p.K381N | c.1143    | 0.112031855 | 3.173 | 1 |
| 1696 PDK3   | ENST00000441463 | p.L66F  | c.196     | 0.121312617 | 0     | 1 |
| 1697 AIM2   | ENST00000368130 | p.A58V  | c.173     | 0.005182989 | 7.592 | 1 |
| 1697 AIM2   | ENST00000368130 | p.E7K   | c.19      | 0.005182989 | 0     | 1 |
| 1698 PAX5   | ENST00000358127 | p.H62N  | c.184     | 1.029708097 | 0     | 1 |
| 1698 PAX5   | ENST00000358127 | p.H62Q  | c.186     | 1.029708097 | 0     | 1 |
| 1698 PAX5   | ENST00000358127 | p.L23P  | c.68      | 0.059416194 | 5.073 | 1 |
| 1699 MBTD1  | ENST00000415868 | p.F364I | c.1090    | 0.095589767 | 3.387 | 1 |
| 1699 MBTD1  | ENST00000415868 | p.M289I | c.867     | 0.095589767 | 0     | 1 |
| 1700 GLB1   | ENST00000445488 | p.F362V | c.1084    | 0.108597218 | 0     | 1 |
| 1700 GLB1   | ENST00000445488 | p.L636I | c.1906    | 0.085002354 | 3.593 | 1 |
| 1700 GLB1   | ENST00000445488 | p.R638C | c.1912    | 0.023767062 | 6.218 | 1 |
| 1700 GLB1   | ENST00000445488 | p.D149G | c.446     | 0.013311902 | 6.346 | 1 |
| 1701 SPOP   | ENST00000503676 | p.D201H | c.601     | 0.017181502 | 5.863 | 1 |
| 1701 SPOP   | ENST00000503676 | p.K238E | c.712     | 0.017181502 | 0     | 1 |
| 1702 MALT1  | ENST00000348428 | p.S382L | c.1145    | 0.040484996 | 5.124 | 1 |
| 1702 MALT1  | ENST00000348428 | p.M612I | c.1836    | 0.020819051 | 6.642 | 1 |
| 1702 MALT1  | ENST00000348428 | p.K677E | c.2029    | 0.039905874 | 5.493 | 1 |
| 1702 MALT1  | ENST00000348428 | p.I712V | c.2134    | 0.060893684 | 0     | 1 |
| 1703 IL3RA  | ENST00000331035 | p.T209N | c.626     | 0.01023463  | 7.716 | 1 |
| 1703 IL3RA  | ENST00000331035 | p.P210A | c.628     | 0.038086824 | 4.94  | 1 |
| 1703 IL3RA  | ENST00000331035 | p.T267M | c.800     | 0.073722533 | 3.808 | 1 |
| 1703 IL3RA  | ENST00000331035 | p.P288L | c.863     | 0.108729813 | 0     | 1 |
| 1704 CBLB   | ENST00000264122 | p.D340G | c.1019    | 0.010753872 | 6.539 | 1 |
| 1704 CBLB   | ENST00000264122 | p.H257Y | c.769     | 0.010753872 | 0     | 1 |
| 1705 API5   | ENST00000531273 | p.R382Q | c.1145    | 0.007763915 | 0     | 1 |
| 1705 API5   | ENST00000531273 | p.I425M | c.1275    | 0.007763915 | 7.009 | 1 |
| 1706 CKM    | ENST00000221476 | p.V72M  | c.214     | 0.067841145 | 0     | 1 |
| 1706 CKM    | ENST00000221476 | p.R96H  | c.287     | 0.058766509 | 4.758 | 1 |
| 1706 CKM    | ENST00000221476 | p.A31V  | c.92      | 0.032025311 | 5.017 | 1 |
| 1707 MSH6   | ENST00000234420 | p.M868T | c.2603    | 1.008875229 | 0     | 1 |



|      |          |                 |                        |           |             |       |   |
|------|----------|-----------------|------------------------|-----------|-------------|-------|---|
| 1707 | MSH6     | ENST00000234420 | p.M868I                | c.2604    | 1.008875229 | 0     | 1 |
| 1707 | MSH6     | ENST00000234420 | p.S1049F               | c.3146    | 0.017750457 | 6.816 | 1 |
| 1708 | BACE1    | ENST00000313005 | p.F60L                 | c.178     | 0.17134396  | 9.628 | 1 |
| 1708 | BACE1    | ENST00000313005 | p.R68T                 | c.203     | 0.112407132 | 9.85  | 1 |
| 1708 | BACE1    | ENST00000313005 | p.V77M                 | c.229     | 0.101121592 | 3.523 | 1 |
| 1708 | BACE1    | ENST00000313005 | p.M79V                 | c.235     | 0.103812165 | 3.482 | 1 |
| 1708 | BACE1    | ENST00000313005 | p.I148V                | c.442     | 0.251783205 | 0     | 1 |
| 1708 | BACE1    | ENST00000313005 | p.SNWEG174in_frame_del | c.534_520 | 0.119729626 | 3.777 | 1 |
| 1709 | GGA1     | ENST00000381756 | p.E39K                 | c.115     | 0.155923246 | 2.857 | 1 |
| 1709 | GGA1     | ENST00000381756 | p.G43R                 | c.127     | 0.04946432  | 4.524 | 1 |
| 1709 | GGA1     | ENST00000381756 | p.M91I                 | c.273     | 0.068069706 | 9.25  | 1 |
| 1709 | GGA1     | ENST00000381756 | p.R97W                 | c.289     | 0.183132293 | 0     | 1 |
| 1710 | GABBR1   | ENST00000377034 | p.G85S                 | c.253     | 0.398044049 | 2.329 | 1 |
| 1710 | GABBR1   | ENST00000377034 | p.S321L                | c.962     | 1.199022025 | 0     | 2 |
| 1711 | NRP1     | ENST00000374867 | p.A344T                | c.1030    | 1.026078415 | 0     | 1 |
| 1711 | NRP1     | ENST00000374867 | p.A344V                | c.1031    | 1.026078415 | 0     | 1 |
| 1711 | NRP1     | ENST00000374867 | p.M417I                | c.1251    | 0.086164406 | 5.261 | 1 |
| 1712 | TSTA3    | ENST00000425753 | p.V91M                 | c.271     | 0.22770736  | 0     | 1 |
| 1712 | TSTA3    | ENST00000425753 | p.M93I                 | c.279     | 0.022180627 | 9.902 | 1 |
| 1712 | TSTA3    | ENST00000425753 | p.I150S                | c.449     | 0.139465899 | 3.086 | 1 |
| 1712 | TSTA3    | ENST00000425753 | p.F165L                | c.495     | 0.024796287 | 6.039 | 1 |
| 1712 | TSTA3    | ENST00000425753 | p.A167T                | c.499     | 0.112033564 | 3.416 | 1 |
| 1713 | CFH      | ENST00000367429 | p.P213S                | c.637     | 0.08169472  | 3.646 | 1 |
| 1713 | CFH      | ENST00000367429 | p.I216V                | c.646     | 0.042854341 | 5.461 | 1 |
| 1713 | CFH      | ENST00000367429 | p.P260S                | c.778     | 0.102583789 | 0     | 1 |
| 1714 | SMS      | ENST00000404933 | p.V69M                 | c.205     | 0.018897499 | 7.024 | 1 |
| 1714 | SMS      | ENST00000404933 | p.R107W                | c.319     | 0.125368418 | 0     | 1 |
| 1714 | SMS      | ENST00000404933 | p.K151N                | c.453     | 0.117684808 | 3.087 | 1 |
| 1715 | GLMN     | ENST00000370360 | p.L478F                | c.1434    | 0.006638164 | 0     | 1 |
| 1715 | GLMN     | ENST00000370360 | p.E502K                | c.1504    | 0.006638164 | 7.235 | 1 |
| 1716 | MR1      | ENST00000367580 | p.R63W                 | c.187     | 0.08663418  | 9.779 | 1 |
| 1716 | MR1      | ENST00000367580 | p.Q92R                 | c.275     | 0.099954492 | 6.231 | 1 |
| 1716 | MR1      | ENST00000367580 | p.F95L                 | c.285     | 0.099903002 | 3.539 | 1 |
| 1716 | MR1      | ENST00000367580 | p.A135V                | c.404     | 0.020938969 | 6.928 | 1 |
| 1716 | MR1      | ENST00000367580 | p.R31C                 | c.91      | 0.108694676 | 0     | 1 |
| 1717 | ACP5     | ENST00000412435 | p.Q248E                | c.742     | 0.079660039 | 0     | 1 |
| 1717 | ACP5     | ENST00000412435 | p.R280H                | c.839     | 0.079660039 | 3.65  | 1 |
| 1718 | MAPKAPK3 | ENST00000446044 | p.V39G                 | c.116     | 0.153786418 | 0     | 1 |
| 1718 | MAPKAPK3 | ENST00000446044 | p.N106D                | c.316     | 0.153786418 | 2.701 | 1 |
| 1719 | PRKCA    | ENST00000413366 | p.R161Q                | c.482     | 0.040735362 | 5.017 | 1 |
| 1719 | PRKCA    | ENST00000413366 | p.L183I                | c.547     | 0.045676327 | 0     | 1 |
| 1719 | PRKCA    | ENST00000413366 | p.G257V                | c.770     | 0.018594468 | 6.079 | 1 |
| 1721 | ACSM2A   | ENST00000424070 | p.W54C                 | c.162     | 0.115594241 | 9.681 | 1 |
| 1722 | MGAM     | ENST00000475668 | p.D1837N               | c.5509    | 1.026875461 | 6.86  | 1 |
| 1722 | MGAM     | ENST00000475668 | p.F2632S               | c.7895    | 0.367857418 | 3.036 | 1 |
| 1722 | MGAM     | ENST00000475668 | p.E2696K               | c.8086    | 2.1391367   | 0     | 3 |
| 1722 | MGAM     | ENST00000475668 | p.D2733H               | c.8197    | 1.026875461 | 6.86  | 1 |
| 1723 | ACVRL1   | ENST00000550683 | p.R425Q                | c.1274    | 1.01328111  | 0     | 2 |
| 1723 | ACVRL1   | ENST00000550683 | p.P466H                | c.1397    | 0.044148569 | 7.227 | 1 |

|              |                 |          |             |             |       |   |
|--------------|-----------------|----------|-------------|-------------|-------|---|
| 1723 ACVRL1  | ENST00000550683 | p.L469R  | c.1406_1407 | 0.035171734 | 7.242 | 1 |
| 1724 PTPN4   | ENST00000263708 | p.A707V  | c.2120      | 0.086389513 | 0     | 1 |
| 1724 PTPN4   | ENST00000263708 | p.M740I  | c.2220      | 0.086389513 | 3.533 | 1 |
| 1725 H2AFY   | ENST00000510038 | p.M366I  | c.1098      | 0.068726009 | 0     | 1 |
| 1725 H2AFY   | ENST00000510038 | p.S187F  | c.560       | 0.068726009 | 3.863 | 1 |
| 1726 CD180   | ENST00000256447 | p.S163F  | c.488       | 0.020861692 | 0     | 1 |
| 1726 CD180   | ENST00000256447 | p.A184D  | c.551       | 0.020861692 | 5.583 | 1 |
| 1727 C6      | ENST00000263413 | p.V664G  | c.1991      | 0.022158438 | 5.496 | 1 |
| 1727 C6      | ENST00000263413 | p.G690W  | c.2068      | 0.022158438 | 0     | 1 |
| 1728 CPA2    | ENST00000222481 | p.H179N  | c.535       | 0.044379006 | 5.254 | 1 |
| 1728 CPA2    | ENST00000222481 | p.R181Q  | c.542       | 0.035231263 | 4.827 | 1 |
| 1728 CPA2    | ENST00000222481 | p.H306Y  | c.916       | 0.061436519 | 0     | 1 |
| 1729 TGM3    | ENST00000381458 | p.R397S  | c.1189      | 0.092043524 | 6.188 | 1 |
| 1729 TGM3    | ENST00000381458 | p.I524V  | c.1570      | 0.245026695 | 3.821 | 1 |
| 1729 TGM3    | ENST00000381458 | p.G528C  | c.1582      | 0.204013111 | 3.068 | 1 |
| 1729 TGM3    | ENST00000381458 | p.K565R  | c.1694      | 0.080687546 | 8.427 | 1 |
| 1729 TGM3    | ENST00000381458 | p.R571Q  | c.1712      | 0.344895416 | 0     | 1 |
| 1729 TGM3    | ENST00000381458 | p.D589V  | c.1766      | 0.159204222 | 7.025 | 1 |
| 1729 TGM3    | ENST00000381458 | p.G317R  | c.949       | 0.01971983  | 6.527 | 1 |
| 1729 TGM3    | ENST00000381458 | p.P319T  | c.955       | 0.12349502  | 3.51  | 1 |
| 1729 TGM3    | ENST00000381458 | p.V327I  | c.979       | 0.176515204 | 4.967 | 1 |
| 1730 DNM1    | ENST00000372923 | p.A734V  | c.2201      | 0.014548357 | 6.103 | 1 |
| 1730 DNM1    | ENST00000372923 | p.G24S   | c.70        | 0.014548357 | 0     | 1 |
| 1731 GUSB    | ENST00000304895 | p.R357Q  | c.1070      | 0.033585912 | 4.896 | 1 |
| 1731 GUSB    | ENST00000304895 | p.P80S   | c.238       | 0.033585912 | 0     | 1 |
| 1732 TCN1    | ENST00000257264 | p.S92L   | c.275       | 0.139757731 | 2.839 | 1 |
| 1732 TCN1    | ENST00000257264 | p.D150E  | c.450       | 0.139757731 | 0     | 1 |
| 1733 ITSN1   | ENST00000381285 | p.N1284T | c.3851      | 0.009355302 | 6.74  | 1 |
| 1733 ITSN1   | ENST00000381285 | p.R1335P | c.4004      | 0.009355302 | 0     | 1 |
| 1734 TIMP3   | ENST00000266085 | p.H83Y   | c.247       | 0.160968536 | 6.772 | 1 |
| 1734 TIMP3   | ENST00000266085 | p.E85D   | c.255       | 0.061581458 | 7.344 | 1 |
| 1734 TIMP3   | ENST00000266085 | p.R107C  | c.319       | 2.016486004 | 0     | 2 |
| 1734 TIMP3   | ENST00000266085 | p.R107H  | c.320       | 2.016486004 | 0     | 1 |
| 1734 TIMP3   | ENST00000266085 | p.T115M  | c.344       | 0.167218276 | 9.726 | 1 |
| 1735 F5      | ENST00000367796 | p.L86I   | c.256       | 0.036498981 | 4.776 | 1 |
| 1735 F5      | ENST00000367796 | p.L110F  | c.330       | 0.043722972 | 6.818 | 1 |
| 1735 F5      | ENST00000367796 | p.G185R  | c.553       | 0.045361915 | 0     | 1 |
| 1736 IRAK4   | ENST00000448290 | p.Y262H  | c.784       | 0.022483337 | 0     | 1 |
| 1736 IRAK4   | ENST00000448290 | p.F330V  | c.988       | 0.022483337 | 5.475 | 1 |
| 1737 PTPRE   | ENST00000419012 | p.A652S  | c.1954      | 1.006310631 | 0     | 2 |
| 1737 PTPRE   | ENST00000419012 | p.F689C  | c.2066      | 0.105018914 | 7.308 | 1 |
| 1738 CYP17A1 | ENST00000369887 | p.R462W  | c.1384      | 0.013611784 | 0     | 1 |
| 1738 CYP17A1 | ENST00000369887 | p.M156I  | c.468       | 0.013611784 | 6.199 | 1 |
| 1739 RPL4    | ENST00000307961 | p.R143C  | c.427       | 1.125347054 | 0     | 1 |
| 1739 RPL4    | ENST00000307961 | p.R143H  | c.428       | 1.125347054 | 0     | 1 |
| 1739 RPL4    | ENST00000307961 | p.D179H  | c.535       | 0.250694109 | 2.996 | 1 |
| 1740 ZWILCH  | ENST00000307897 | p.L182I  | c.544       | 0.083794537 | 3.577 | 1 |
| 1740 ZWILCH  | ENST00000307897 | p.D235N  | c.703       | 0.083794537 | 0     | 1 |
| 1741 FTL     | ENST00000331825 | p.E89Q   | c.265       | 0.003426615 | 8.189 | 1 |

|                |                 |         |        |             |       |   |
|----------------|-----------------|---------|--------|-------------|-------|---|
| 1741 FTL       | ENST00000331825 | p.Q26K  | c.76   | 0.003426615 | 0     | 1 |
| 1742 ACVR2B    | ENST00000352511 | p.V336M | c.1006 | 0.007345111 | 7.089 | 1 |
| 1742 ACVR2B    | ENST00000352511 | p.A266T | c.796  | 0.007345111 | 0     | 1 |
| 1743 ITGA5     | ENST00000293379 | p.V335I | c.1003 | 1.025266516 | 0     | 2 |
| 1743 ITGA5     | ENST00000293379 | p.L381F | c.1141 | 0.018493408 | 7.236 | 1 |
| 1743 ITGA5     | ENST00000293379 | p.P429H | c.1286 | 0.042492182 | 5.746 | 1 |
| 1744 ZFYVE9    | ENST00000371591 | p.T966A | c.2896 | 0.012421645 | 6.331 | 1 |
| 1744 ZFYVE9    | ENST00000371591 | p.F996C | c.2987 | 0.012421645 | 0     | 1 |
| 1745 GPHN      | ENST00000543237 | p.R119W | c.355  | 1.169099151 | 0     | 1 |
| 1745 GPHN      | ENST00000543237 | p.R119Q | c.356  | 1.169099151 | 0     | 1 |
| 1745 GPHN      | ENST00000543237 | p.I148M | c.444  | 0.316259067 | 2.723 | 1 |
| 1745 GPHN      | ENST00000543237 | p.A185V | c.554  | 0.048621039 | 5.825 | 1 |
| 1746 DNAJB9    | ENST00000249356 | p.S36A  | c.106  | 1.150621539 | 0     | 1 |
| 1746 DNAJB9    | ENST00000249356 | p.S36L  | c.107  | 1.150621539 | 0     | 1 |
| 1746 DNAJB9    | ENST00000249356 | p.R83Q  | c.248  | 0.301243079 | 2.731 | 1 |
| 1747 SERPINA10 | ENST00000261994 | p.R88L  | c.263  | 1.079604842 | 0     | 1 |
| 1747 SERPINA10 | ENST00000261994 | p.R88Q  | c.263  | 1.079604842 | 0     | 1 |
| 1747 SERPINA10 | ENST00000261994 | p.D314N | c.940  | 0.159209684 | 3.651 | 1 |
| 1748 CDC25C    | ENST00000513970 | p.G339R | c.1015 | 0.035548561 | 4.901 | 1 |
| 1748 CDC25C    | ENST00000513970 | p.C433F | c.1298 | 0.095581032 | 0     | 1 |
| 1748 CDC25C    | ENST00000513970 | p.R331H | c.992  | 0.064190166 | 4.009 | 1 |
| 1749 SCARB2    | ENST00000264896 | p.F66L  | c.198  | 0.127707484 | 3.079 | 1 |
| 1749 SCARB2    | ENST00000264896 | p.R134T | c.401  | 0.20048069  | 0     | 1 |
| 1749 SCARB2    | ENST00000264896 | p.H171D | c.511  | 0.002976845 | 8.392 | 1 |
| 1749 SCARB2    | ENST00000264896 | p.E175K | c.523  | 0.088532921 | 3.659 | 1 |
| 1750 IFNG      | ENST00000229135 | p.K35N  | c.105  | 0.013999826 | 9.578 | 1 |
| 1750 IFNG      | ENST00000229135 | p.F38C  | c.113  | 0.268760041 | 0     | 1 |
| 1750 IFNG      | ENST00000229135 | p.L51I  | c.151  | 0.037282624 | 9.239 | 1 |
| 1750 IFNG      | ENST00000229135 | p.L79P  | c.236  | 0.176353318 | 3.767 | 1 |
| 1750 IFNG      | ENST00000229135 | p.Q129K | c.385  | 0.203863859 | 3.486 | 1 |
| 1750 IFNG      | ENST00000229135 | p.R130C | c.388  | 0.161796114 | 3.278 | 1 |
| 1751 RRP9      | ENST00000232888 | p.A287D | c.860  | 0.076415017 | 0     | 1 |
| 1751 RRP9      | ENST00000232888 | p.D328N | c.982  | 0.076415017 | 3.71  | 1 |
| 1752 CAP1      | ENST00000372805 | p.S434F | c.1301 | 0.009303569 | 0     | 1 |
| 1752 CAP1      | ENST00000372805 | p.F457L | c.1371 | 0.009303569 | 6.748 | 1 |
| 1753 GNAI3     | ENST00000369851 | p.M119T | c.356  | 0.015549371 | 0     | 1 |
| 1753 GNAI3     | ENST00000369851 | p.Q164P | c.491  | 0.015549371 | 6.007 | 1 |
| 1754 CNNM4     | ENST00000377075 | p.R387H | c.1160 | 0.01076879  | 6.537 | 1 |
| 1754 CNNM4     | ENST00000377075 | p.K439E | c.1315 | 0.01076879  | 0     | 1 |
| 1755 SH3GL3    | ENST00000324537 | p.E64K  | c.190  | 0.06758659  | 3.909 | 1 |
| 1755 SH3GL3    | ENST00000324537 | p.Q67K  | c.199  | 0.016299569 | 6.032 | 1 |
| 1755 SH3GL3    | ENST00000324537 | p.T97M  | c.290  | 0.081851504 | 0     | 1 |
| 1756 CAPN2     | ENST00000295006 | p.N384S | c.1151 | 0.030005961 | 5.885 | 1 |
| 1756 CAPN2     | ENST00000295006 | p.D513N | c.1537 | 0.13895392  | 2.99  | 1 |
| 1756 CAPN2     | ENST00000295006 | p.R628W | c.1882 | 0.142790929 | 0     | 1 |
| 1757 FAP       | ENST00000188790 | p.P216T | c.646  | 0.11258869  | 0     | 1 |
| 1757 FAP       | ENST00000188790 | p.T300I | c.899  | 0.095098384 | 3.422 | 1 |
| 1757 FAP       | ENST00000188790 | p.R303L | c.908  | 0.029273651 | 5.696 | 1 |
| 1758 TMPRSS15  | ENST00000284885 | p.P906Q | c.2717 | 0.140444572 | 3.925 | 1 |

|      |          |                 |          |        |             |       |   |
|------|----------|-----------------|----------|--------|-------------|-------|---|
| 1758 | TMPRSS15 | ENST00000284885 | p.Q942K  | c.2824 | 0.012216713 | 7.355 | 1 |
| 1758 | TMPRSS15 | ENST00000284885 | p.M945K  | c.2834 | 0.179231223 | 3.618 | 1 |
| 1758 | TMPRSS15 | ENST00000284885 | p.D965N  | c.2893 | 0.155823391 | 4.27  | 1 |
| 1758 | TMPRSS15 | ENST00000284885 | p.K994R  | c.2981 | 0.046153182 | 9.078 | 1 |
| 1758 | TMPRSS15 | ENST00000284885 | p.R1000H | c.2999 | 1.207072922 | 0     | 2 |
| 1759 | GNAI1    | ENST00000351004 | p.S44F   | c.131  | 0.022297102 | 5.487 | 1 |
| 1759 | GNAI1    | ENST00000351004 | p.A326V  | c.977  | 0.022297102 | 0     | 1 |
| 1760 | PTPRN    | ENST00000295718 | p.L481P  | c.1442 | 0.069975806 | 3.837 | 1 |
| 1760 | PTPRN    | ENST00000295718 | p.P512T  | c.1534 | 0.069975806 | 0     | 1 |
| 1761 | TOP3A    | ENST00000321105 | p.T377M  | c.1130 | 0.023997035 | 0     | 1 |
| 1761 | TOP3A    | ENST00000321105 | p.G401C  | c.1201 | 0.023997035 | 5.381 | 1 |
| 1762 | HDAC1    | ENST00000373548 | p.R34Q   | c.101  | 0.077858588 | 3.683 | 1 |
| 1762 | HDAC1    | ENST00000373548 | p.V308I  | c.922  | 0.077858588 | 0     | 1 |
| 1763 | P2RY14   | ENST00000309170 | p.R119S  | c.357  | 0.02584448  | 5.274 | 1 |
| 1763 | P2RY14   | ENST00000309170 | p.K229N  | c.687  | 0.02584448  | 0     | 1 |
| 1764 | POLG2    | ENST00000539111 | p.V118L  | c.352  | 0.012779449 | 7.021 | 1 |
| 1764 | POLG2    | ENST00000539111 | p.V119A  | c.356  | 0.01127288  | 6.471 | 1 |
| 1764 | POLG2    | ENST00000539111 | p.L208H  | c.623  | 0.018972485 | 0     | 1 |
| 1765 | ADAMTS5  | ENST00000284987 | p.D369E  | c.1107 | 0.125086673 | 0     | 1 |
| 1765 | ADAMTS5  | ENST00000284987 | p.E398D  | c.1194 | 0.125086673 | 2.999 | 1 |
| 1767 | SAMHD1   | ENST00000262878 | p.A202T  | c.604  | 0.007432174 | 7.072 | 1 |
| 1767 | SAMHD1   | ENST00000262878 | p.S302Y  | c.905  | 0.007432174 | 0     | 1 |
| 1768 | PDE2A    | ENST00000334456 | p.Y632H  | c.1894 | 0.167821563 | 0     | 1 |
| 1768 | PDE2A    | ENST00000334456 | p.H748Y  | c.2242 | 0.167821563 | 2.575 | 1 |
| 1769 | CTNND1   | ENST00000428599 | p.K408N  | c.1224 | 0.121194234 | 0     | 1 |
| 1769 | CTNND1   | ENST00000428599 | p.R461Q  | c.1382 | 0.085438266 | 3.871 | 1 |
| 1769 | CTNND1   | ENST00000428599 | p.A463D  | c.1388 | 0.056460234 | 4.242 | 1 |
| 1770 | LANCL1   | ENST00000443314 | p.G216R  | c.646  | 0.13925989  | 3.919 | 1 |
| 1770 | LANCL1   | ENST00000443314 | p.P263L  | c.788  | 1.066109435 | 0     | 2 |
| 1771 | ETFA     | ENST00000557943 | p.L77M   | c.229  | 0.099995016 | 3.322 | 1 |
| 1771 | ETFA     | ENST00000557943 | p.T99A   | c.295  | 0.107375852 | 0     | 1 |
| 1771 | ETFA     | ENST00000557943 | p.T191I  | c.572  | 0.099970824 | 7.082 | 1 |
| 1772 | ITGAM    | ENST00000544665 | p.G337C  | c.1009 | 0.01979116  | 5.659 | 1 |
| 1772 | ITGAM    | ENST00000544665 | p.Q146E  | c.436  | 0.031665573 | 0     | 1 |
| 1772 | ITGAM    | ENST00000544665 | p.S183P  | c.547  | 0.01859126  | 6.396 | 1 |
| 1773 | CDKN2A   | ENST00000361570 | p.G166R  | c.496  | 0.11211102  | 3.157 | 1 |
| 1774 | NTRK3    | ENST00000360948 | p.H370N  | c.1108 | 0.358126599 | 3.456 | 1 |
| 1774 | NTRK3    | ENST00000360948 | p.K397N  | c.1191 | 1.106631905 | 0     | 2 |
| 1774 | NTRK3    | ENST00000360948 | p.E398K  | c.1192 | 0.201176901 | 6.011 | 1 |
| 1775 | EBF3     | ENST00000355311 | p.E350K  | c.1048 | 0.049659575 | 0     | 1 |
| 1775 | EBF3     | ENST00000355311 | p.E372K  | c.1114 | 0.020095273 | 5.637 | 1 |
| 1775 | EBF3     | ENST00000355311 | p.Y413N  | c.1237 | 0.029564301 | 5.08  | 1 |
| 1776 | ANG      | ENST00000397990 | p.R119Q  | c.356  | 0.063022028 | 3.988 | 1 |
| 1776 | ANG      | ENST00000397990 | p.P147S  | c.439  | 0.063022028 | 0     | 1 |
| 1777 | ACADS    | ENST00000242592 | p.G113R  | c.337  | 0.015625    | 6     | 1 |
| 1777 | ACADS    | ENST00000242592 | p.G274S  | c.820  | 0.019403423 | 0     | 1 |
| 1777 | ACADS    | ENST00000242592 | p.A331T  | c.991  | 0.018681991 | 8.048 | 1 |
| 1778 | FH       | ENST00000366560 | p.R87H   | c.260  | 0.144852972 | 2.894 | 1 |
| 1778 | FH       | ENST00000366560 | p.T90I   | c.269  | 0.087056437 | 3.704 | 1 |

|                |                 |          |             |             |       |   |
|----------------|-----------------|----------|-------------|-------------|-------|---|
| 1778 FH        | ENST00000366560 | p.N133S  | c.398       | 0.211263496 | 0     | 1 |
| 1779 TCEA1     | ENST00000521604 | p.R190T  | c.569       | 0.07465876  | 7.88  | 1 |
| 1779 TCEA1     | ENST00000521604 | p.R194K  | c.581       | 0.198040621 | 0     | 1 |
| 1779 TCEA1     | ENST00000521604 | p.R222S  | c.666       | 0.138749947 | 4.052 | 1 |
| 1779 TCEA1     | ENST00000521604 | p.M223L  | c.667       | 0.141557035 | 2.905 | 1 |
| 1780 TNFAIP8L2 | ENST00000368910 | p.V38M   | c.112       | 0.106655417 | 0     | 1 |
| 1780 TNFAIP8L2 | ENST00000368910 | p.K170N  | c.510       | 0.028854629 | 5.226 | 1 |
| 1780 TNFAIP8L2 | ENST00000368910 | p.G174E  | c.521       | 0.08207241  | 3.645 | 1 |
| 1781 LIFR      | ENST00000263409 | p.P70T   | c.208       | 0.015614173 | 6.001 | 1 |
| 1781 LIFR      | ENST00000263409 | p.F125L  | c.375       | 0.015614173 | 0     | 1 |
| 1782 DDI1      | ENST00000302259 | p.I298F  | c.892       | 0.270564768 | 4.023 | 1 |
| 1782 DDI1      | ENST00000302259 | p.S319P  | c.955       | 1.069735874 | 0     | 1 |
| 1782 DDI1      | ENST00000302259 | p.S319C  | c.956       | 1.069735874 | 0     | 1 |
| 1782 DDI1      | ENST00000302259 | p.I320V  | c.958       | 0.258606607 | 7.303 | 1 |
| 1782 DDI1      | ENST00000302259 | p.E322K  | c.964       | 0.205400358 | 9.046 | 1 |
| 1783 GAK       | ENST00000314167 | p.E85K   | c.253       | 0.045531222 | 4.457 | 1 |
| 1783 GAK       | ENST00000314167 | p.C190F  | c.569       | 0.045531222 | 0     | 1 |
| 1784 MEF2A     | ENST00000338042 | p.L38F   | c.112       | 0.141905263 | 0     | 1 |
| 1784 MEF2A     | ENST00000338042 | p.I11V   | c.31        | 0.141905263 | 2.817 | 1 |
| 1785 LTA4H     | ENST00000228740 | p.L366R  | c.1097      | 0.021492841 | 5.54  | 1 |
| 1785 LTA4H     | ENST00000228740 | p.A447T  | c.1339      | 0.021492841 | 0     | 1 |
| 1786 HDAC6     | ENST00000334136 | p.H1115R | c.3344      | 0.08820474  | 3.503 | 1 |
| 1786 HDAC6     | ENST00000334136 | p.P1171L | c.3512      | 0.08820474  | 0     | 1 |
| 1787 INPPL1    | ENST00000541756 | p.A259V  | c.776       | 0.226537602 | 3.744 | 1 |
| 1787 INPPL1    | ENST00000541756 | p.V283I  | c.847       | 1.097750629 | 0     | 1 |
| 1787 INPPL1    | ENST00000541756 | p.V283A  | c.848       | 1.097750629 | 0     | 1 |
| 1787 INPPL1    | ENST00000541756 | p.V304I  | c.910       | 0.123498063 | 5.435 | 1 |
| 1788 TPI1      | ENST00000229270 | p.A39V   | c.116       | 0.098212341 | 3.488 | 1 |
| 1788 TPI1      | ENST00000229270 | p.V199I  | c.595       | 0.118404404 | 5.313 | 1 |
| 1788 TPI1      | ENST00000229270 | p.T213N  | c.638       | 0.159711615 | 3.703 | 1 |
| 1788 TPI1      | ENST00000229270 | p.R243C  | c.727       | 0.1514479   | 7.524 | 1 |
| 1788 TPI1      | ENST00000229270 | p.I244V  | c.730       | 0.196501618 | 0     | 1 |
| 1789 MTAP      | ENST00000580900 | p.F113L  | c.339       | 0.056150514 | 0     | 1 |
| 1789 MTAP      | ENST00000580900 | p.V170I  | c.508       | 0.029400816 | 5.088 | 1 |
| 1789 MTAP      | ENST00000580900 | p.S178N  | c.533       | 0.01979116  | 5.659 | 1 |
| 1789 MTAP      | ENST00000580900 | p.P200S  | c.598       | 0.025360457 | 7.167 | 1 |
| 1790 PTPRC     | ENST00000442510 | p.A745V  | c.2234      | 0.082109875 | 7.235 | 1 |
| 1790 PTPRC     | ENST00000442510 | p.V747L  | c.2239      | 1.200926301 | 0     | 1 |
| 1790 PTPRC     | ENST00000442510 | p.V747A  | c.2240      | 1.200926301 | 0     | 1 |
| 1790 PTPRC     | ENST00000442510 | p.S842I  | c.2525      | 0.187849907 | 3.551 | 1 |
| 1790 PTPRC     | ENST00000442510 | p.V850A  | c.2549      | 0.292167446 | 3.198 | 1 |
| 1791 NEDD4     | ENST00000508342 | p.W846F  | c.2538_2537 | 0.190080382 | 0     | 1 |
| 1791 NEDD4     | ENST00000508342 | p.W868S  | c.2603      | 0.04599358  | 6.11  | 1 |
| 1791 NEDD4     | ENST00000508342 | p.P871S  | c.2611      | 0.167321974 | 2.618 | 1 |
| 1791 NEDD4     | ENST00000508342 | p.P876S  | c.2626      | 0.01477927  | 6.298 | 1 |
| 1792 UAP1      | ENST00000367925 | p.R447H  | c.1340      | 0.083607135 | 0     | 1 |
| 1792 UAP1      | ENST00000367925 | p.I483M  | c.1449      | 0.036071419 | 4.793 | 1 |
| 1792 UAP1      | ENST00000367925 | p.S484F  | c.1451      | 0.023051429 | 5.439 | 1 |
| 1792 UAP1      | ENST00000367925 | p.D500G  | c.1499      | 0.024484287 | 5.352 | 1 |

|               |                 |          |           |             |       |   |
|---------------|-----------------|----------|-----------|-------------|-------|---|
| 1793 MUT      | ENST00000274813 | p.P419H  | c.1256    | 0.09964906  | 3.327 | 1 |
| 1793 MUT      | ENST00000274813 | p.T101A  | c.301     | 0.09964906  | 0     | 1 |
| 1794 IFIT1    | ENST00000371804 | p.Y106C  | c.317     | 0.09349286  | 3.419 | 1 |
| 1794 IFIT1    | ENST00000371804 | p.L14M   | c.40      | 0.09668779  | 0     | 1 |
| 1794 IFIT1    | ENST00000371804 | p.R135K  | c.404     | 0.010606526 | 8.29  | 1 |
| 1795 GFRA3    | ENST00000274721 | p.T170I  | c.509     | 0.003637089 | 0     | 1 |
| 1795 GFRA3    | ENST00000274721 | p.F203L  | c.609     | 0.003637089 | 8.103 | 1 |
| 1796 PTPRK    | ENST00000368207 | p.F1076L | c.3228    | 0.095193046 | 3.393 | 1 |
| 1796 PTPRK    | ENST00000368207 | p.S1103T | c.3307    | 0.095193046 | 0     | 1 |
| 1797 PTPRZ1   | ENST00000393386 | p.I95L   | c.283     | 1.030449949 | 0     | 2 |
| 1797 PTPRZ1   | ENST00000393386 | p.A195V  | c.584     | 0.022639721 | 6.465 | 1 |
| 1797 PTPRZ1   | ENST00000393386 | p.G207W  | c.619     | 0.018632951 | 6.746 | 1 |
| 1797 PTPRZ1   | ENST00000393386 | p.F263V  | c.787     | 0.046338133 | 6.671 | 1 |
| 1798 CD300A   | ENST00000360141 | p.I61T   | c.182     | 0.003685306 | 8.084 | 1 |
| 1798 CD300A   | ENST00000360141 | p.T89I   | c.266     | 0.003685306 | 0     | 1 |
| 1799 GNPDA1   | ENST00000311337 | p.C118Y  | c.353     | 0.083446769 | 0     | 1 |
| 1799 GNPDA1   | ENST00000311337 | p.R158C  | c.472     | 0.083446769 | 3.583 | 1 |
| 1800 SERPINE1 | ENST00000223095 | p.T238A  | c.712     | 0.33920137  | 0     | 1 |
| 1800 SERPINE1 | ENST00000223095 | p.H26R   | c.77      | 0.238833694 | 2.865 | 1 |
| 1800 SERPINE1 | ENST00000223095 | p.A272V  | c.815     | 0.220112922 | 2.382 | 1 |
| 1800 SERPINE1 | ENST00000223095 | p.R294C  | c.880     | 0.113702588 | 6.63  | 1 |
| 1801 UGDH     | ENST00000316423 | p.R346K  | c.1037    | 0.238575963 | 0     | 1 |
| 1801 UGDH     | ENST00000316423 | p.Y14C   | c.41      | 0.136623436 | 3.119 | 1 |
| 1801 UGDH     | ENST00000316423 | p.V270G  | c.809     | 0.02737288  | 5.979 | 1 |
| 1801 UGDH     | ENST00000316423 | p.S275N  | c.824     | 0.129020211 | 3.216 | 1 |
| 1802 REG1A    | ENST00000233735 | p.C47F   | c.140     | 0.133384702 | 5.941 | 1 |
| 1802 REG1A    | ENST00000233735 | p.E80K   | c.238     | 1.17770941  | 0     | 1 |
| 1802 REG1A    | ENST00000233735 | p.EG80DC | c.240_241 | 1.17770941  | 0     | 1 |
| 1802 REG1A    | ENST00000233735 | p.K163N  | c.489     | 0.423694557 | 2.631 | 1 |
| 1803 SENP2    | ENST00000296257 | p.D364N  | c.1090    | 0.052884912 | 0     | 1 |
| 1803 SENP2    | ENST00000296257 | p.F575L  | c.1723    | 0.052884912 | 4.241 | 1 |
| 1804 SMURF2   | ENST00000262435 | p.P35L   | c.104     | 0.267386772 | 1.903 | 1 |
| 1804 SMURF2   | ENST00000262435 | p.P59L   | c.176     | 0.267386772 | 0     | 1 |
| 1805 CLK3     | ENST00000395066 | p.T428I  | c.1283    | 0.186715283 | 4.838 | 1 |
| 1805 CLK3     | ENST00000395066 | p.A472V  | c.1415    | 0.206263484 | 8.072 | 1 |
| 1805 CLK3     | ENST00000395066 | p.D475G  | c.1424    | 1.184776902 | 0     | 1 |
| 1805 CLK3     | ENST00000395066 | p.D475E  | c.1425    | 1.184776902 | 0     | 1 |
| 1805 CLK3     | ENST00000395066 | p.R262H  | c.785     | 1.170602364 | 3.775 | 2 |
| 1806 SLC4A1   | ENST00000262418 | p.L121P  | c.362     | 0.03724008  | 4.747 | 1 |
| 1806 SLC4A1   | ENST00000262418 | p.R304P  | c.911     | 0.03724008  | 0     | 1 |
| 1807 ESRRG    | ENST00000360012 | p.A221P  | c.661     | 0.092818715 | 6.684 | 1 |
| 1807 ESRRG    | ENST00000360012 | p.I256V  | c.766     | 0.120511154 | 0     | 1 |
| 1807 ESRRG    | ENST00000360012 | p.I285M  | c.855     | 0.09429297  | 3.422 | 1 |
| 1807 ESRRG    | ENST00000360012 | p.I287V  | c.859     | 0.018619918 | 6.552 | 1 |
| 1807 ESRRG    | ENST00000360012 | p.G289R  | c.865     | 0.00682952  | 7.194 | 1 |
| 1808 PLA2G4A  | ENST00000367466 | p.F107V  | c.319     | 0.008132981 | 6.942 | 1 |
| 1808 PLA2G4A  | ENST00000367466 | p.E116A  | c.347     | 0.007269138 | 7.104 | 1 |
| 1808 PLA2G4A  | ENST00000367466 | p.T21M   | c.62      | 0.015402119 | 0     | 1 |
| 1809 APAF1    | ENST00000551964 | p.R434H  | c.1301    | 0.014264365 | 6.312 | 1 |

|      |        |                 |         |        |             |       |   |
|------|--------|-----------------|---------|--------|-------------|-------|---|
| 1809 | APAF1  | ENST00000551964 | p.R205Q | c.614  | 0.153492621 | 0     | 1 |
| 1809 | APAF1  | ENST00000551964 | p.R228C | c.682  | 0.136012272 | 2.907 | 1 |
| 1809 | APAF1  | ENST00000551964 | p.R233C | c.697  | 0.008594083 | 7.043 | 1 |
| 1810 | PTPRR  | ENST00000283228 | p.T465M | c.1394 | 0.055207191 | 4.179 | 1 |
| 1810 | PTPRR  | ENST00000283228 | p.R627K | c.1880 | 0.055207191 | 0     | 1 |
| 1811 | LTF    | ENST00000231751 | p.R361H | c.1082 | 0.142793281 | 3.808 | 1 |
| 1811 | LTF    | ENST00000231751 | p.R627C | c.1879 | 1.07139664  | 0     | 2 |
| 1812 | CETP   | ENST00000200676 | p.G251S | c.751  | 0.012216713 | 6.355 | 1 |
| 1812 | CETP   | ENST00000200676 | p.F287V | c.859  | 0.012216713 | 0     | 1 |
| 1813 | CUL4A  | ENST00000375440 | p.E342K | c.1024 | 0.013602353 | 6.2   | 1 |
| 1813 | CUL4A  | ENST00000375440 | p.D308N | c.922  | 0.013602353 | 0     | 1 |
| 1814 | DCK    | ENST00000504952 | p.E87D  | c.261  | 0.014900321 | 6.226 | 1 |
| 1814 | DCK    | ENST00000504952 | p.E90K  | c.268  | 0.116883723 | 3.116 | 1 |
| 1814 | DCK    | ENST00000504952 | p.A138E | c.413  | 0.128702221 | 0     | 1 |
| 1815 | UGT2B7 | ENST00000305231 | p.R369I | c.1106 | 0.036651092 | 4.77  | 1 |
| 1815 | UGT2B7 | ENST00000305231 | p.F371C | c.1112 | 0.020249078 | 5.626 | 1 |
| 1815 | UGT2B7 | ENST00000305231 | p.G410E | c.1229 | 0.005652089 | 7.467 | 1 |
| 1815 | UGT2B7 | ENST00000305231 | p.V432L | c.1294 | 0.062552259 | 0     | 1 |
| 1816 | FECH   | ENST00000382873 | p.L95F  | c.283  | 0.177109255 | 3.607 | 1 |
| 1816 | FECH   | ENST00000382873 | p.R121Q | c.362  | 1.083050023 | 0     | 2 |
| 1816 | FECH   | ENST00000382873 | p.V172A | c.515  | 0.130517103 | 9.995 | 1 |
| 1817 | ATIC   | ENST00000236959 | p.L384F | c.1150 | 0.06506385  | 0     | 1 |
| 1817 | ATIC   | ENST00000236959 | p.L244S | c.731  | 0.06506385  | 3.942 | 1 |
| 1818 | CDH1   | ENST00000261769 | p.P260H | c.779  | 0.053144827 | 4.381 | 1 |
| 1818 | CDH1   | ENST00000261769 | p.E261K | c.781  | 0.112471436 | 3.22  | 1 |
| 1818 | CDH1   | ENST00000261769 | p.A286V | c.857  | 0.15531475  | 0     | 1 |
| 1819 | UBA52  | ENST00000430157 | p.R42G  | c.124  | 0.116688278 | 3.196 | 1 |
| 1819 | UBA52  | ENST00000430157 | p.V5L   | c.13   | 0.014746337 | 7.122 | 1 |
| 1819 | UBA52  | ENST00000430157 | p.L71S  | c.212  | 0.122459332 | 0     | 1 |
| 1819 | UBA52  | ENST00000430157 | p.I13V  | c.37   | 0.006159376 | 7.343 | 1 |
| 1820 | THBS1  | ENST00000260356 | p.A81D  | c.242  | 0.047530586 | 4.395 | 1 |
| 1820 | THBS1  | ENST00000260356 | p.N28S  | c.83   | 0.047530586 | 0     | 1 |
| 1821 | C1S    | ENST00000328916 | p.I530N | c.1589 | 0.015409886 | 7.02  | 1 |
| 1821 | C1S    | ENST00000328916 | p.K669N | c.2007 | 1.007704943 | 0     | 2 |
| 1822 | AK5    | ENST00000354567 | p.G462S | c.1384 | 1.0254181   | 0     | 1 |
| 1822 | AK5    | ENST00000354567 | p.G462V | c.1385 | 1.0254181   | 0     | 1 |
| 1822 | AK5    | ENST00000354567 | p.A515T | c.1543 | 0.060217477 | 5.298 | 1 |
| 1823 | LRP6   | ENST00000261349 | p.R644Q | c.1931 | 0.009585039 | 6.705 | 1 |
| 1823 | LRP6   | ENST00000261349 | p.I645L | c.1933 | 0.080059609 | 3.676 | 1 |
| 1823 | LRP6   | ENST00000261349 | p.S646Y | c.1937 | 0.02511468  | 5.424 | 1 |
| 1823 | LRP6   | ENST00000261349 | p.Q870K | c.2608 | 0.111114667 | 0     | 1 |
| 1824 | P2RY2  | ENST00000393597 | p.C106S | c.316  | 0.078617811 | 3.669 | 1 |
| 1824 | P2RY2  | ENST00000393597 | p.R177H | c.530  | 0.078617811 | 0     | 1 |
| 1825 | E2F1   | ENST00000343380 | p.V246A | c.737  | 0.001748096 | 9.16  | 1 |
| 1825 | E2F1   | ENST00000343380 | p.R252C | c.754  | 0.058801632 | 4.088 | 1 |
| 1825 | E2F1   | ENST00000343380 | p.P299H | c.896  | 0.060549728 | 0     | 1 |
| 1826 | NAMPT  | ENST00000222553 | p.G355E | c.1064 | 0.01536722  | 6.024 | 1 |
| 1826 | NAMPT  | ENST00000222553 | p.K423R | c.1268 | 0.01536722  | 0     | 1 |
| 1827 | IMPDH2 | ENST00000326739 | p.P69S  | c.205  | 0.036524289 | 4.775 | 1 |

|             |                 |          |             |             |       |   |
|-------------|-----------------|----------|-------------|-------------|-------|---|
| 1827 IMPDH2 | ENST00000326739 | p.H93R   | c.278       | 0.036524289 | 0     | 1 |
| 1828 FGG    | ENST00000407946 | p.Q345H  | c.1035      | 0.504269138 | 2.829 | 1 |
| 1828 FGG    | ENST00000407946 | p.N371S  | c.1112      | 0.097913265 | 8.794 | 1 |
| 1828 FGG    | ENST00000407946 | p.W242C  | c.726       | 0.126666678 | 6.377 | 1 |
| 1828 FGG    | ENST00000407946 | p.G263E  | c.788       | 0.136370591 | 6.52  | 1 |
| 1828 FGG    | ENST00000407946 | p.R309C  | c.925       | 1.171693855 | 0     | 1 |
| 1828 FGG    | ENST00000407946 | p.R309G  | c.925       | 1.171693855 | 0     | 1 |
| 1828 FGG    | ENST00000407946 | p.L310I  | c.928       | 0.059352557 | 7.434 | 1 |
| 1829 HNF4G  | ENST00000396423 | p.Q338L  | c.1013      | 0.192203669 | 0     | 1 |
| 1829 HNF4G  | ENST00000396423 | p.R251L  | c.752       | 0.062894687 | 4.176 | 1 |
| 1829 HNF4G  | ENST00000396423 | p.R255H  | c.764       | 0.144454136 | 2.869 | 1 |
| 1830 CDYL   | ENST00000328908 | p.T353A  | c.1057      | 0.280650954 | 0     | 1 |
| 1830 CDYL   | ENST00000328908 | p.H354R  | c.1061      | 0.035385599 | 8.705 | 1 |
| 1830 CDYL   | ENST00000328908 | p.D386N  | c.1156      | 0.01030265  | 6.818 | 1 |
| 1830 CDYL   | ENST00000328908 | p.S387R  | c.1161      | 0.191839    | 2.622 | 1 |
| 1830 CDYL   | ENST00000328908 | p.V390L  | c.1167_1168 | 0.146728041 | 3.225 | 1 |
| 1831 EEF1A1 | ENST00000316292 | p.H7R    | c.20        | 0.322402229 | 6.795 | 1 |
| 1831 EEF1A1 | ENST00000316292 | p.R240H  | c.719       | 0.363561107 | 5.079 | 1 |
| 1831 EEF1A1 | ENST00000316292 | p.E268K  | c.802       | 1.038590163 | 0     | 1 |
| 1831 EEF1A1 | ENST00000316292 | p.E268Q  | c.802       | 1.038590163 | 0     | 1 |
| 1832 PTPRJ  | ENST00000418331 | p.R1223C | c.3667      | 0.106579361 | 3.23  | 1 |
| 1832 PTPRJ  | ENST00000418331 | p.Y1257C | c.3770      | 0.106579361 | 0     | 1 |
| 1833 KEAP1  | ENST00000171111 | p.D422N  | c.1264      | 2.155761209 | 2.408 | 2 |
| 1833 KEAP1  | ENST00000171111 | p.R470C  | c.1408      | 5.510898304 | 0     | 5 |
| 1833 KEAP1  | ENST00000171111 | p.R470H  | c.1409      | 5.510898304 | 0     | 1 |
| 1833 KEAP1  | ENST00000171111 | p.E493D  | c.1479      | 0.854907517 | 2.899 | 1 |
| 1834 KMT2C  | ENST00000355193 | p.V390M  | c.1168      | 0.037468691 | 8.561 | 1 |
| 1834 KMT2C  | ENST00000355193 | p.N393K  | c.1179      | 1.084945715 | 0     | 2 |
| 1834 KMT2C  | ENST00000355193 | p.H414Y  | c.1240      | 0.196768993 | 3.603 | 1 |
| 1835 PSAT1  | ENST00000376588 | p.C80Y   | c.239       | 1.0171577   | 0     | 2 |
| 1835 PSAT1  | ENST00000376588 | p.K110Q  | c.328       | 0.0343154   | 5.865 | 1 |
| 1836 MET    | ENST00000318493 | p.V1088E | c.3263      | 1.099146805 | 0     | 2 |
| 1836 MET    | ENST00000318493 | p.T1114S | c.3341      | 0.145127428 | 3.797 | 1 |
| 1836 MET    | ENST00000318493 | p.N1118D | c.3352      | 0.019901211 | 6.651 | 1 |
| 1836 MET    | ENST00000318493 | p.R1166Q | c.3497      | 0.035747456 | 5.857 | 1 |
| 1837 F10    | ENST00000375559 | p.L343P  | c.1028      | 0.064177617 | 0     | 1 |
| 1837 F10    | ENST00000375559 | p.A457D  | c.1370      | 0.02295576  | 5.445 | 1 |
| 1837 F10    | ENST00000375559 | p.D463E  | c.1389      | 0.017074652 | 5.872 | 1 |
| 1837 F10    | ENST00000375559 | p.N221S  | c.662       | 0.024147205 | 5.372 | 1 |
| 1838 CYP1A1 | ENST00000567032 | p.K38E   | c.112       | 1.009404582 | 0     | 1 |
| 1838 CYP1A1 | ENST00000567032 | p.K38N   | c.114       | 1.009404582 | 0     | 1 |
| 1838 CYP1A1 | ENST00000567032 | p.S395R  | c.1183      | 0.044155089 | 7.199 | 1 |
| 1838 CYP1A1 | ENST00000567032 | p.R136H  | c.407       | 0.035740684 | 8.588 | 1 |
| 1839 NAGA   | ENST00000396398 | p.S353F  | c.1058      | 0.013084476 | 0     | 1 |
| 1839 NAGA   | ENST00000396398 | p.E383Q  | c.1147      | 0.013084476 | 6.256 | 1 |
| 1840 MGAM   | ENST00000475668 | p.A1017T | c.3049      | 0.073149915 | 3.773 | 1 |
| 1840 MGAM   | ENST00000475668 | p.R1039C | c.3115      | 0.073149915 | 0     | 1 |
| 1841 DPYS   | ENST00000351513 | p.F425V  | c.1273      | 0.015250496 | 6.035 | 1 |
| 1841 DPYS   | ENST00000351513 | p.A292V  | c.875       | 0.015250496 | 0     | 1 |



|      |          |                 |          |        |             |       |   |
|------|----------|-----------------|----------|--------|-------------|-------|---|
| 1842 | SERPINB2 | ENST00000457692 | p.F350L  | c.1050 | 0.092383409 | 4.047 | 1 |
| 1842 | SERPINB2 | ENST00000457692 | p.R380K  | c.1139 | 0.179710156 | 0     | 1 |
| 1842 | SERPINB2 | ENST00000457692 | p.T381A  | c.1141 | 0.052182308 | 7.567 | 1 |
| 1842 | SERPINB2 | ENST00000457692 | p.T194I  | c.581  | 0.026603136 | 9.364 | 1 |
| 1842 | SERPINB2 | ENST00000457692 | p.R238H  | c.713  | 0.166132187 | 3.153 | 1 |
| 1843 | PKLR     | ENST00000342741 | p.G263E  | c.788  | 0.05739436  | 5.669 | 1 |
| 1843 | PKLR     | ENST00000342741 | p.R289L  | c.866  | 1.098928915 | 0     | 1 |
| 1843 | PKLR     | ENST00000342741 | p.R289Q  | c.866  | 1.098928915 | 0     | 1 |
| 1843 | PKLR     | ENST00000342741 | p.D324N  | c.970  | 0.160107021 | 3.657 | 1 |
| 1844 | CBLB     | ENST00000264122 | p.E942Q  | c.2824 | 0.006574058 | 0     | 1 |
| 1844 | CBLB     | ENST00000264122 | p.E969K  | c.2905 | 0.006574058 | 7.249 | 1 |
| 1845 | LGR4     | ENST00000379214 | p.P283H  | c.848  | 0.02812506  | 7.152 | 1 |
| 1845 | LGR4     | ENST00000379214 | p.R304C  | c.910  | 3.028479459 | 0     | 3 |
| 1845 | LGR4     | ENST00000379214 | p.R304H  | c.911  | 3.028479459 | 0     | 1 |
| 1845 | LGR4     | ENST00000379214 | p.G328S  | c.982  | 0.085792777 | 5.543 | 1 |
| 1847 | DNMT3A   | ENST00000321117 | p.Y359C  | c.1076 | 0.075519192 | 3.777 | 1 |
| 1847 | DNMT3A   | ENST00000321117 | p.Q374L  | c.1121 | 0.0146298   | 7.174 | 1 |
| 1847 | DNMT3A   | ENST00000321117 | p.I407T  | c.1220 | 0.079872238 | 0     | 1 |
| 1848 | SI       | ENST00000264382 | p.G125A  | c.374  | 2.136419187 | 0     | 1 |
| 1848 | SI       | ENST00000264382 | p.G125E  | c.374  | 2.136419187 | 0     | 2 |
| 1848 | SI       | ENST00000264382 | p.V126A  | c.377  | 1.198362781 | 6.353 | 2 |
| 1848 | SI       | ENST00000264382 | p.E127K  | c.379  | 0.046898821 | 8.523 | 1 |
| 1848 | SI       | ENST00000264382 | p.T150N  | c.449  | 0.572301846 | 3.484 | 1 |
| 1848 | SI       | ENST00000264382 | p.R159G  | c.475  | 2.033603871 | 7.239 | 1 |
| 1848 | SI       | ENST00000264382 | p.R159W  | c.475  | 2.033603871 | 7.239 | 2 |
| 1849 | PECR     | ENST00000265322 | p.D276Y  | c.826  | 0.163006342 | 0     | 1 |
| 1849 | PECR     | ENST00000265322 | p.K298N  | c.894  | 0.163006342 | 2.617 | 1 |
| 1850 | AOC3     | ENST00000308423 | p.G392C  | c.1174 | 0.01065002  | 6.553 | 1 |
| 1850 | AOC3     | ENST00000308423 | p.S464F  | c.1391 | 0.01065002  | 0     | 1 |
| 1851 | CAPN7    | ENST00000253693 | p.I716T  | c.2147 | 0.032486857 | 4.944 | 1 |
| 1851 | CAPN7    | ENST00000253693 | p.P786S  | c.2356 | 0.032486857 | 0     | 1 |
| 1852 | TOP2A    | ENST00000423485 | p.E922D  | c.2766 | 0.093363341 | 0     | 1 |
| 1852 | TOP2A    | ENST00000423485 | p.F968L  | c.2902 | 0.093363341 | 3.421 | 1 |
| 1853 | CD80     | ENST00000264246 | p.E177G  | c.530  | 0.015549371 | 0     | 1 |
| 1853 | CD80     | ENST00000264246 | p.T210S  | c.629  | 0.015549371 | 6.007 | 1 |
| 1854 | LAMTOR5  | ENST00000256644 | p.I100T  | c.299  | 0.084964265 | 3.557 | 1 |
| 1854 | LAMTOR5  | ENST00000256644 | p.H169N  | c.505  | 0.084964265 | 0     | 1 |
| 1855 | TARBP1   | ENST00000040877 | p.G1488W | c.4462 | 0.068393356 | 3.87  | 1 |
| 1855 | TARBP1   | ENST00000040877 | p.Q1589H | c.4767 | 0.068393356 | 0     | 1 |
| 1856 | NAE1     | ENST00000359087 | p.P446S  | c.1336 | 0.018238003 | 0     | 1 |
| 1856 | NAE1     | ENST00000359087 | p.E484G  | c.1451 | 0.009665097 | 6.693 | 1 |
| 1856 | NAE1     | ENST00000359087 | p.A491T  | c.1471 | 0.008572906 | 6.866 | 1 |
| 1857 | HAO1     | ENST00000378789 | p.H87Y   | c.259  | 0.099294969 | 0     | 1 |
| 1857 | HAO1     | ENST00000378789 | p.A322V  | c.965  | 0.042708136 | 4.632 | 1 |
| 1857 | HAO1     | ENST00000378789 | p.Q324H  | c.972  | 0.061342949 | 4.084 | 1 |
| 1858 | VEGFA    | ENST00000372055 | p.R335C  | c.1003 | 0.120976017 | 3.374 | 1 |
| 1858 | VEGFA    | ENST00000372055 | p.E248Q  | c.742  | 0.045024268 | 4.606 | 1 |
| 1858 | VEGFA    | ENST00000372055 | p.P291L  | c.872  | 0.022543364 | 8.978 | 1 |
| 1858 | VEGFA    | ENST00000372055 | p.H292Y  | c.874  | 0.139501636 | 0     | 1 |

|              |                 |          |        |             |       |   |
|--------------|-----------------|----------|--------|-------------|-------|---|
| 1859 FGG     | ENST00000407946 | p.Q145P  | c.434  | 0.010459807 | 0     | 1 |
| 1859 FGG     | ENST00000407946 | p.D331N  | c.991  | 0.010459807 | 6.579 | 1 |
| 1860 ANPEP   | ENST00000300060 | p.R631Q  | c.1892 | 0.017725867 | 0     | 1 |
| 1860 ANPEP   | ENST00000300060 | p.A665T  | c.1993 | 0.017725867 | 5.818 | 1 |
| 1861 LIG3    | ENST00000378526 | p.D717E  | c.2151 | 0.100272646 | 3.318 | 1 |
| 1861 LIG3    | ENST00000378526 | p.L822P  | c.2465 | 0.100272646 | 0     | 1 |
| 1862 RPS20   | ENST00000519807 | p.L61F   | c.183  | 0.002716566 | 8.524 | 1 |
| 1862 RPS20   | ENST00000519807 | p.H85R   | c.254  | 0.012108075 | 0     | 1 |
| 1862 RPS20   | ENST00000519807 | p.E111K  | c.331  | 0.008602895 | 7.127 | 1 |
| 1862 RPS20   | ENST00000519807 | p.S31F   | c.92   | 0.003686065 | 8.804 | 1 |
| 1863 ROS1    | ENST00000368508 | p.L2155F | c.6465 | 0.02419747  | 0     | 1 |
| 1863 ROS1    | ENST00000368508 | p.R2184I | c.6551 | 0.02419747  | 5.369 | 1 |
| 1864 TLR5    | ENST00000366881 | p.R392L  | c.1175 | 0.022266213 | 0     | 1 |
| 1864 TLR5    | ENST00000366881 | p.N413D  | c.1237 | 0.022266213 | 5.489 | 1 |
| 1865 ALDH3A1 | ENST00000444455 | p.A233T  | c.697  | 0.011461979 | 0     | 1 |
| 1865 ALDH3A1 | ENST00000444455 | p.K265Q  | c.793  | 0.011461979 | 6.447 | 1 |
| 1866 PEA15   | ENST00000368076 | p.R106S  | c.316  | 0.001139013 | 9.778 | 1 |
| 1866 PEA15   | ENST00000368076 | p.G26R   | c.76   | 0.001139013 | 0     | 1 |
| 1867 CTSV    | ENST00000259470 | p.S247F  | c.740  | 0.03020936  | 8.897 | 1 |
| 1867 CTSV    | ENST00000259470 | p.V248I  | c.742  | 0.150107666 | 0     | 1 |
| 1867 CTSV    | ENST00000259470 | p.C323R  | c.967  | 0.148971252 | 3.045 | 1 |
| 1867 CTSV    | ENST00000259470 | p.A326T  | c.976  | 0.040900493 | 5.219 | 1 |
| 1868 AURKA   | ENST00000395909 | p.K227N  | c.681  | 0.158219574 | 2.66  | 1 |
| 1868 AURKA   | ENST00000395909 | p.L323F  | c.969  | 0.158219574 | 0     | 1 |
| 1869 CD8A    | ENST00000352580 | p.E37K   | c.109  | 0.160094983 | 3.643 | 1 |
| 1869 CD8A    | ENST00000352580 | p.D104N  | c.310  | 1.080047491 | 0     | 1 |
| 1869 CD8A    | ENST00000352580 | p.D104Y  | c.310  | 1.080047491 | 0     | 1 |
| 1870 GEMIN7  | ENST00000270257 | p.R63W   | c.187  | 0.007790869 | 7.004 | 1 |
| 1870 GEMIN7  | ENST00000270257 | p.D96N   | c.286  | 0.007790869 | 0     | 1 |
| 1871 FSCN1   | ENST00000382361 | p.A35V   | c.104  | 0.020221026 | 0     | 1 |
| 1871 FSCN1   | ENST00000382361 | p.R118H  | c.353  | 0.020221026 | 5.628 | 1 |
| 1872 IKBKB   | ENST00000520810 | p.A422T  | c.1264 | 0.039418044 | 4.665 | 1 |
| 1872 IKBKB   | ENST00000520810 | p.T583N  | c.1748 | 0.039418044 | 0     | 1 |
| 1873 UPF1    | ENST00000599848 | p.D396H  | c.1186 | 0.014288517 | 0     | 1 |
| 1873 UPF1    | ENST00000599848 | p.T548M  | c.1643 | 0.014288517 | 6.129 | 1 |
| 1874 XDH     | ENST00000379416 | p.G738S  | c.2212 | 0.06886553  | 8.222 | 1 |
| 1874 XDH     | ENST00000379416 | p.P1003S | c.3007 | 0.008178205 | 6.934 | 1 |
| 1874 XDH     | ENST00000379416 | p.V1201A | c.3602 | 0.0807824   | 3.741 | 1 |
| 1874 XDH     | ENST00000379416 | p.G1203S | c.3607 | 0.032646922 | 5.108 | 1 |
| 1874 XDH     | ENST00000379416 | p.G1205S | c.3613 | 0.128803476 | 4.29  | 1 |
| 1874 XDH     | ENST00000379416 | p.P1264S | c.3790 | 0.166432815 | 0     | 1 |
| 1875 PYGM    | ENST00000164139 | p.E191K  | c.571  | 1.155070912 | 0     | 1 |
| 1875 PYGM    | ENST00000164139 | p.E191Q  | c.571  | 1.155070912 | 0     | 1 |
| 1875 PYGM    | ENST00000164139 | p.T229M  | c.686  | 1.155070912 | 3.689 | 2 |
| 1876 ERCC1   | ENST00000013807 | p.V112I  | c.334  | 0.269060031 | 1.894 | 1 |
| 1876 ERCC1   | ENST00000013807 | p.F140I  | c.418  | 0.269060031 | 0     | 1 |
| 1877 PGR     | ENST00000325455 | p.E723K  | c.2167 | 1.134846284 | 0     | 2 |
| 1877 PGR     | ENST00000325455 | p.E907K  | c.2719 | 0.204281131 | 3.316 | 1 |
| 1877 PGR     | ENST00000325455 | p.S910F  | c.2729 | 0.072326702 | 4.86  | 1 |

|              |                 |          |        |             |       |   |
|--------------|-----------------|----------|--------|-------------|-------|---|
| 1878 PLA2G2A | ENST00000375111 | p.T60M   | c.179  | 0.126915147 | 3.017 | 1 |
| 1878 PLA2G2A | ENST00000375111 | p.C63S   | c.187  | 0.030735419 | 5.192 | 1 |
| 1878 PLA2G2A | ENST00000375111 | p.Y125N  | c.373  | 0.150891685 | 0     | 1 |
| 1879 SEMA4D  | ENST00000438547 | p.R190Q  | c.569  | 0.185695867 | 9.697 | 1 |
| 1879 SEMA4D  | ENST00000438547 | p.P196H  | c.587  | 1.008730276 | 0     | 1 |
| 1879 SEMA4D  | ENST00000438547 | p.P196L  | c.587  | 1.008730276 | 0     | 1 |
| 1879 SEMA4D  | ENST00000438547 | p.D260N  | c.778  | 0.190325039 | 7.054 | 1 |
| 1880 HAO1    | ENST00000378789 | p.R172C  | c.514  | 1.036533103 | 0     | 2 |
| 1880 HAO1    | ENST00000378789 | p.D201Y  | c.601  | 0.021898866 | 6.513 | 1 |
| 1880 HAO1    | ENST00000378789 | p.R28G   | c.82   | 0.018363693 | 6.767 | 1 |
| 1880 HAO1    | ENST00000378789 | p.D33N   | c.97   | 1.016401823 | 6.93  | 2 |
| 1881 CRYM    | ENST00000219599 | p.A144S  | c.430  | 0.006470083 | 0     | 1 |
| 1881 CRYM    | ENST00000219599 | p.K171I  | c.512  | 0.006470083 | 7.272 | 1 |
| 1882 CHIA    | ENST00000369740 | p.R40C   | c.118  | 0.024684007 | 6.82  | 1 |
| 1882 CHIA    | ENST00000369740 | p.L76F   | c.226  | 1.008850655 | 0     | 1 |
| 1882 CHIA    | ENST00000369740 | p.L76V   | c.226  | 1.008850655 | 0     | 1 |
| 1883 PTK2B   | ENST00000544172 | p.P52S   | c.154  | 0.222427869 | 0     | 1 |
| 1883 PTK2B   | ENST00000544172 | p.R79W   | c.235  | 0.111108876 | 3.338 | 1 |
| 1883 PTK2B   | ENST00000544172 | p.R85Q   | c.254  | 0.13575242  | 3.017 | 1 |
| 1884 ALDH4A1 | ENST00000290597 | p.E35K   | c.103  | 0.154213396 | 2.697 | 1 |
| 1884 ALDH4A1 | ENST00000290597 | p.R171W  | c.511  | 0.154213396 | 0     | 1 |
| 1885 ERBB3   | ENST00000267101 | p.H768R  | c.2303 | 0.071992978 | 0     | 1 |
| 1885 ERBB3   | ENST00000267101 | p.K820N  | c.2460 | 0.071992978 | 3.796 | 1 |
| 1886 HIBCH   | ENST00000359678 | p.D383E  | c.1149 | 0.13057947  | 0     | 1 |
| 1886 HIBCH   | ENST00000359678 | p.R331W  | c.991  | 0.13057947  | 2.937 | 1 |
| 1887 GSK3A   | ENST00000222330 | p.N171D  | c.511  | 0.013668512 | 6.193 | 1 |
| 1887 GSK3A   | ENST00000222330 | p.C262R  | c.784  | 0.013668512 | 0     | 1 |
| 1888 ERBB2   | ENST00000269571 | p.I767M  | c.2301 | 0.026413894 | 9.142 | 1 |
| 1888 ERBB2   | ENST00000269571 | p.D769H  | c.2305 | 3.030425839 | 8.938 | 1 |
| 1888 ERBB2   | ENST00000269571 | p.D769N  | c.2305 | 3.030425839 | 8.938 | 1 |
| 1888 ERBB2   | ENST00000269571 | p.D769Y  | c.2305 | 3.030425839 | 8.938 | 2 |
| 1888 ERBB2   | ENST00000269571 | p.V842I  | c.2524 | 6.136144517 | 0     | 7 |
| 1888 ERBB2   | ENST00000269571 | p.R868W  | c.2602 | 0.962170401 | 2.986 | 1 |
| 1889 PTPRC   | ENST00000442510 | p.Y792C  | c.2375 | 0.016412028 | 7.198 | 1 |
| 1889 PTPRC   | ENST00000442510 | p.W1027R | c.3079 | 0.070491311 | 0     | 1 |
| 1889 PTPRC   | ENST00000442510 | p.K1151N | c.3453 | 0.0636807   | 3.973 | 1 |
| 1890 F5      | ENST00000367796 | p.R2107C | c.6319 | 1.032849153 | 0     | 2 |
| 1890 F5      | ENST00000367796 | p.L2219P | c.6656 | 0.065698307 | 4.928 | 1 |
| 1891 NAT2    | ENST00000286479 | p.W67R   | c.199  | 0.007520269 | 0     | 1 |
| 1891 NAT2    | ENST00000286479 | p.T211M  | c.632  | 0.007520269 | 7.055 | 1 |
| 1892 DLD     | ENST00000205402 | p.H149Y  | c.445  | 0.043821926 | 6.782 | 1 |
| 1892 DLD     | ENST00000205402 | p.G170D  | c.509  | 1.009086875 | 0     | 2 |
| 1893 PIK3C3  | ENST00000262039 | p.E562K  | c.1684 | 0.005132936 | 7.606 | 1 |
| 1893 PIK3C3  | ENST00000262039 | p.R566H  | c.1697 | 0.050695447 | 4.302 | 1 |
| 1893 PIK3C3  | ENST00000262039 | p.L694I  | c.2080 | 0.055828383 | 0     | 1 |
| 1894 NXF1    | ENST00000532297 | p.M216I  | c.648  | 0.014568539 | 0     | 1 |
| 1894 NXF1    | ENST00000532297 | p.V245I  | c.733  | 0.014568539 | 6.101 | 1 |
| 1895 CUL5    | ENST00000531427 | p.V526A  | c.1577 | 0.016097718 | 0     | 1 |
| 1895 CUL5    | ENST00000531427 | p.V558I  | c.1672 | 0.016097718 | 5.957 | 1 |

|              |                 |          |             |             |       |   |
|--------------|-----------------|----------|-------------|-------------|-------|---|
| 1896 RPS6KA3 | ENST00000379565 | p.E233K  | c.697       | 0.17115694  | 3.374 | 1 |
| 1896 RPS6KA3 | ENST00000379565 | p.V256L  | c.766       | 0.190501074 | 0     | 1 |
| 1896 RPS6KA3 | ENST00000379565 | p.T276A  | c.826       | 0.072636909 | 7.29  | 1 |
| 1896 RPS6KA3 | ENST00000379565 | p.F303L  | c.909       | 0.096111083 | 3.512 | 1 |
| 1897 KIT     | ENST00000288135 | p.M552L  | c.1654      | 0.023494018 | 0     | 1 |
| 1897 KIT     | ENST00000288135 | p.L631F  | c.1893      | 0.009957505 | 6.65  | 1 |
| 1897 KIT     | ENST00000288135 | p.K826N  | c.2478      | 0.013536513 | 6.207 | 1 |
| 1898 FGD5    | ENST00000285046 | p.L900R  | c.2699      | 0.014915953 | 6.067 | 1 |
| 1898 FGD5    | ENST00000285046 | p.L967P  | c.2900      | 0.014915953 | 0     | 1 |
| 1899 EPN1    | ENST00000411543 | p.K218N  | c.654       | 0.180992272 | 2.466 | 1 |
| 1899 EPN1    | ENST00000411543 | p.K239N  | c.717       | 0.180992272 | 0     | 1 |
| 1900 AGO1    | ENST00000373204 | p.A455T  | c.1363      | 0.0854854   | 3.606 | 1 |
| 1900 AGO1    | ENST00000373204 | p.P456L  | c.1367_1368 | 0.044251489 | 4.612 | 1 |
| 1900 AGO1    | ENST00000373204 | p.Y492D  | c.1474      | 0.123020041 | 0     | 1 |
| 1901 KCNU1   | ENST00000399881 | p.G481A  | c.1442      | 0.053437636 | 0     | 1 |
| 1901 KCNU1   | ENST00000399881 | p.N733K  | c.2199      | 0.053437636 | 4.226 | 1 |
| 1902 ANK1    | ENST00000396942 | p.G1415D | c.4244      | 0.16747295  | 2.578 | 1 |
| 1902 ANK1    | ENST00000396942 | p.S1447C | c.4339      | 0.16747295  | 0     | 1 |
| 1903 KDR     | ENST00000263923 | p.I1077L | c.3229      | 0.150493965 | 0     | 1 |
| 1903 KDR     | ENST00000263923 | p.S1104F | c.3311      | 0.02886979  | 5.284 | 1 |
| 1903 KDR     | ENST00000263923 | p.G1108W | c.3322      | 0.077594286 | 3.797 | 1 |
| 1903 KDR     | ENST00000263923 | p.F1115C | c.3344      | 0.058046958 | 4.241 | 1 |
| 1904 ANKRD27 | ENST00000306065 | p.A770T  | c.2308      | 1.017615631 | 0     | 2 |
| 1904 ANKRD27 | ENST00000306065 | p.S799L  | c.2396      | 0.063244841 | 5.827 | 1 |
| 1905 CDYL    | ENST00000328908 | p.S455C  | c.1364      | 0.114228931 | 0     | 1 |
| 1905 CDYL    | ENST00000328908 | p.D483N  | c.1447      | 0.114228931 | 3.13  | 1 |
| 1906 JAK1    | ENST00000342505 | p.L932R  | c.2795      | 0.137762122 | 0     | 1 |
| 1906 JAK1    | ENST00000342505 | p.Y933F  | c.2798      | 0.035894745 | 8.647 | 1 |
| 1906 JAK1    | ENST00000342505 | p.R997W  | c.2989      | 0.112611719 | 3.743 | 1 |
| 1906 JAK1    | ENST00000342505 | p.Y999H  | c.2995      | 0.072672524 | 4.045 | 1 |
| 1907 LCN2    | ENST00000373017 | p.C96Y   | c.287       | 0.161208531 | 0     | 1 |
| 1907 LCN2    | ENST00000373017 | p.L27M   | c.79        | 0.161208531 | 2.633 | 1 |
| 1908 IGF2R   | ENST00000356956 | p.V1584M | c.4750      | 1.011414409 | 0     | 1 |
| 1908 IGF2R   | ENST00000356956 | p.V1584A | c.4751      | 1.011414409 | 0     | 1 |
| 1908 IGF2R   | ENST00000356956 | p.C1614Y | c.4841      | 0.022828818 | 6.453 | 1 |
| 1909 AHCY    | ENST00000217426 | p.H384Y  | c.1150      | 0.025033434 | 5.32  | 1 |
| 1909 AHCY    | ENST00000217426 | p.P427L  | c.1280      | 0.01949165  | 5.681 | 1 |
| 1909 AHCY    | ENST00000217426 | p.Y165H  | c.493_492   | 0.044525083 | 0     | 1 |
| 1910 IVD     | ENST00000487418 | p.A338T  | c.1012      | 0.004123257 | 0     | 1 |
| 1910 IVD     | ENST00000487418 | p.N43T   | c.128       | 0.004123257 | 7.922 | 1 |
| 1911 TOP2B   | ENST00000264331 | p.R748Q  | c.2243      | 0.142299254 | 3.813 | 1 |
| 1911 TOP2B   | ENST00000264331 | p.Y862H  | c.2584      | 1.082046062 | 0     | 1 |
| 1911 TOP2B   | ENST00000264331 | p.Y862C  | c.2585      | 1.082046062 | 0     | 1 |
| 1911 TOP2B   | ENST00000264331 | p.F1043L | c.3129      | 0.02179287  | 6.52  | 1 |
| 1912 PTPRM   | ENST00000400060 | p.E1003A | c.3008      | 0.0217476   | 5.523 | 1 |
| 1912 PTPRM   | ENST00000400060 | p.K1037N | c.3111      | 0.007515058 | 7.056 | 1 |
| 1912 PTPRM   | ENST00000400060 | p.R1065G | c.3193      | 0.029262658 | 0     | 1 |
| 1913 ASL     | ENST00000304874 | p.M339V  | c.1015      | 0.035896824 | 5.8   | 1 |
| 1913 ASL     | ENST00000304874 | p.S247L  | c.740       | 1.03954579  | 0     | 2 |

|             |                 |          |           |             |       |   |
|-------------|-----------------|----------|-----------|-------------|-------|---|
| 1913 ASL    | ENST00000304874 | p.R306W  | c.916     | 1.028896811 | 6.533 | 1 |
| 1913 ASL    | ENST00000304874 | p.R306L  | c.917     | 1.028896811 | 6.533 | 1 |
| 1914 XPO1   | ENST00000404992 | p.E361K  | c.1081    | 0.204743354 | 0     | 1 |
| 1914 XPO1   | ENST00000404992 | p.K492R  | c.1475    | 0.037623658 | 4.962 | 1 |
| 1914 XPO1   | ENST00000404992 | p.R305Q  | c.914     | 0.178198916 | 2.534 | 1 |
| 1915 MTOR   | ENST00000361445 | p.E1799K | c.5395    | 3.064578575 | 6.748 | 4 |
| 1915 MTOR   | ENST00000361445 | p.F1888I | c.5662    | 4.037214277 | 0     | 1 |
| 1915 MTOR   | ENST00000361445 | p.F1888V | c.5662    | 4.037214277 | 0     | 1 |
| 1915 MTOR   | ENST00000361445 | p.F1888L | c.5664    | 4.037214277 | 0     | 3 |
| 1916 DIRAS1 | ENST00000323469 | p.G79C   | c.235     | 1.038360414 | 0     | 2 |
| 1916 DIRAS1 | ENST00000323469 | p.V10M   | c.28      | 0.043134917 | 5.535 | 1 |
| 1916 DIRAS1 | ENST00000323469 | p.R170C  | c.508     | 1.016792956 | 6.896 | 1 |
| 1916 DIRAS1 | ENST00000323469 | p.R170H  | c.509     | 1.016792956 | 6.896 | 1 |
| 1917 CD300A | ENST00000360141 | p.Y38N   | c.112     | 0.011393402 | 7.749 | 1 |
| 1917 CD300A | ENST00000360141 | p.P53L   | c.158     | 0.007520269 | 7.055 | 1 |
| 1917 CD300A | ENST00000360141 | p.P116L  | c.347_348 | 0.01216883  | 0     | 1 |
| 1918 MYO10  | ENST00000513610 | p.F1958I | c.5872    | 0.038419965 | 5.702 | 1 |
| 1918 MYO10  | ENST00000513610 | p.R1985C | c.5953    | 1.019209982 | 0     | 1 |
| 1918 MYO10  | ENST00000513610 | p.R1985H | c.5954    | 1.019209982 | 0     | 1 |
| 1919 GAPDHS | ENST00000222286 | p.N81K   | c.243     | 0.103664943 | 0     | 1 |
| 1919 GAPDHS | ENST00000222286 | p.T170R  | c.509     | 0.103664943 | 3.27  | 1 |
| 1920 IGBP1  | ENST00000342206 | p.N111H  | c.331     | 0.008513688 | 6.876 | 1 |
| 1920 IGBP1  | ENST00000342206 | p.I208F  | c.622     | 0.008513688 | 0     | 1 |
| 1921 PTPN13 | ENST00000436978 | p.L2252I | c.6754    | 0.051467564 | 4.388 | 1 |
| 1921 PTPN13 | ENST00000436978 | p.P2253L | c.6758    | 0.081295016 | 3.688 | 1 |
| 1921 PTPN13 | ENST00000436978 | p.R2452I | c.7355    | 0.125350984 | 0     | 1 |
| 1922 C8A    | ENST00000361249 | p.S379F  | c.1136    | 0.096646429 | 0     | 1 |
| 1922 C8A    | ENST00000361249 | p.F402C  | c.1205    | 0.070690575 | 3.862 | 1 |
| 1922 C8A    | ENST00000361249 | p.G405V  | c.1214    | 0.029789678 | 5.165 | 1 |
| 1923 CFB    | ENST00000556679 | p.A803T  | c.2407    | 0.013936383 | 0     | 1 |
| 1923 CFB    | ENST00000556679 | p.R1107Q | c.3320    | 0.013936383 | 6.165 | 1 |
| 1924 CUL4B  | ENST00000404115 | p.L490F  | c.1468    | 0.015009295 | 7.058 | 1 |
| 1924 CUL4B  | ENST00000404115 | p.A543D  | c.1628    | 1.007504647 | 0     | 1 |
| 1924 CUL4B  | ENST00000404115 | p.A543V  | c.1628    | 1.007504647 | 0     | 1 |
| 1925 LEPR   | ENST00000349533 | p.C447Y  | c.1340    | 0.004209895 | 7.892 | 1 |
| 1925 LEPR   | ENST00000349533 | p.Q491H  | c.1473    | 0.004209895 | 0     | 1 |
| 1926 MAD1L1 | ENST00000406869 | p.D661N  | c.1981    | 0.009881871 | 6.661 | 1 |
| 1926 MAD1L1 | ENST00000406869 | p.R714H  | c.2141    | 0.009881871 | 0     | 1 |
| 1927 MITD1  | ENST00000289359 | p.H89Y   | c.265     | 0.109688266 | 3.358 | 1 |
| 1927 MITD1  | ENST00000289359 | p.M204T  | c.611     | 0.136811487 | 3.004 | 1 |
| 1927 MITD1  | ENST00000289359 | p.F241L  | c.723     | 0.222184591 | 0     | 1 |
| 1928 ERBB3  | ENST00000267101 | p.R103H  | c.308     | 0.093060151 | 9.351 | 1 |
| 1928 ERBB3  | ENST00000267101 | p.V104L  | c.310     | 10.15556263 | 0     | 2 |
| 1928 ERBB3  | ENST00000267101 | p.V104M  | c.310     | 10.15556263 | 0     | 9 |
| 1928 ERBB3  | ENST00000267101 | p.A232V  | c.695     | 0.113788891 | 6.595 | 1 |
| 1928 ERBB3  | ENST00000267101 | p.A245V  | c.734     | 1.811592518 | 3.799 | 2 |
| 1929 DOC2A  | ENST00000564944 | p.E193K  | c.577     | 0.132954084 | 2.911 | 1 |
| 1929 DOC2A  | ENST00000564944 | p.E214K  | c.640     | 0.132954084 | 0     | 1 |
| 1930 NRP2   | ENST00000360409 | p.S349F  | c.1046    | 0.008484233 | 6.881 | 1 |

|             |                 |         |        |             |       |   |
|-------------|-----------------|---------|--------|-------------|-------|---|
| 1930 NRP2   | ENST00000360409 | p.G317C | c.949  | 0.008484233 | 0     | 1 |
| 1931 PNLIP  | ENST00000369221 | p.N401K | c.1203 | 0.018971795 | 5.72  | 1 |
| 1931 PNLIP  | ENST00000369221 | p.T309N | c.926  | 0.018971795 | 0     | 1 |
| 1932 FKBP4  | ENST00000001008 | p.R152C | c.454  | 0.007114608 | 7.135 | 1 |
| 1932 FKBP4  | ENST00000001008 | p.R186W | c.556  | 0.007625248 | 7.035 | 1 |
| 1932 FKBP4  | ENST00000001008 | p.E246G | c.737  | 0.014739836 | 0     | 1 |
| 1933 CAPN2  | ENST00000295006 | p.A101V | c.302  | 0.100551046 | 0     | 1 |
| 1933 CAPN2  | ENST00000295006 | p.L166I | c.496  | 0.100551046 | 3.314 | 1 |
| 1934 KIF11  | ENST00000260731 | p.F144I | c.430  | 0.13406051  | 2.921 | 1 |
| 1934 KIF11  | ENST00000260731 | p.N206S | c.617  | 0.147371001 | 0     | 1 |
| 1934 KIF11  | ENST00000260731 | p.V256I | c.766  | 0.017360105 | 6.027 | 1 |
| 1935 PARP1  | ENST00000366794 | p.F553L | c.1659 | 0.459405367 | 3.007 | 1 |
| 1935 PARP1  | ENST00000366794 | p.W584S | c.1751 | 0.202891459 | 8.738 | 1 |
| 1935 PARP1  | ENST00000366794 | p.H613R | c.1838 | 0.335229633 | 6.13  | 1 |
| 1935 PARP1  | ENST00000366794 | p.M615I | c.1845 | 0.114173833 | 6.748 | 1 |
| 1935 PARP1  | ENST00000366794 | p.A625T | c.1873 | 1.150319221 | 0     | 2 |
| 1936 CPA4   | ENST00000222482 | p.E414K | c.1240 | 0.158905387 | 0     | 1 |
| 1936 CPA4   | ENST00000222482 | p.E329D | c.987  | 0.149731848 | 2.755 | 1 |
| 1936 CPA4   | ENST00000222482 | p.E330K | c.988  | 0.012364042 | 6.537 | 1 |
| 1937 FECH   | ENST00000382873 | p.D103Y | c.307  | 0.157562924 | 2.666 | 1 |
| 1937 FECH   | ENST00000382873 | p.N210S | c.629  | 0.157562924 | 0     | 1 |
| 1938 EIF4E2 | ENST00000258416 | p.F62Y  | c.185  | 0.080651669 | 3.833 | 1 |
| 1938 EIF4E2 | ENST00000258416 | p.L115I | c.343  | 0.219543989 | 0     | 1 |
| 1938 EIF4E2 | ENST00000258416 | p.A169V | c.506  | 0.15985548  | 2.743 | 1 |
| 1939 HMGCR  | ENST00000287936 | p.R590C | c.1768 | 0.108988142 | 0     | 1 |
| 1939 HMGCR  | ENST00000287936 | p.V683I | c.2047 | 0.100900134 | 3.309 | 1 |
| 1939 HMGCR  | ENST00000287936 | p.A751T | c.2251 | 0.026337498 | 6.95  | 1 |
| 1940 POFUT2 | ENST00000349485 | p.V139F | c.415  | 0.065563515 | 0     | 1 |
| 1940 POFUT2 | ENST00000349485 | p.V190I | c.568  | 0.065013743 | 4.029 | 1 |
| 1940 POFUT2 | ENST00000349485 | p.E221Q | c.661  | 0.010954674 | 7.859 | 1 |
| 1941 AP1S1  | ENST00000337619 | p.A41P  | c.121  | 0.030531941 | 0     | 1 |
| 1941 AP1S1  | ENST00000337619 | p.F8C   | c.23   | 0.004723264 | 7.726 | 1 |
| 1941 AP1S1  | ENST00000337619 | p.R10W  | c.28   | 0.025808677 | 5.276 | 1 |
| 1942 DDX58  | ENST00000379883 | p.H786Y | c.2356 | 0.018211581 | 5.779 | 1 |
| 1942 DDX58  | ENST00000379883 | p.R866Q | c.2597 | 0.018211581 | 0     | 1 |
| 1943 UBE2G1 | ENST00000396981 | p.R37Q  | c.110  | 0.13860008  | 0     | 1 |
| 1943 UBE2G1 | ENST00000396981 | p.H58Y  | c.172  | 0.13860008  | 2.851 | 1 |
| 1944 HDC    | ENST00000267845 | p.E426K | c.1276 | 1.011573748 | 0     | 2 |
| 1944 HDC    | ENST00000267845 | p.L466F | c.1396 | 0.031036179 | 6.433 | 1 |
| 1945 RPL27  | ENST00000589913 | p.S70F  | c.209  | 0.012904339 | 0     | 1 |
| 1945 RPL27  | ENST00000589913 | p.E113G | c.338  | 0.012904339 | 6.276 | 1 |
| 1946 PRKCB  | ENST00000303531 | p.D494N | c.1480 | 0.008425628 | 0     | 1 |
| 1946 PRKCB  | ENST00000303531 | p.Y518N | c.1552 | 0.008425628 | 6.891 | 1 |
| 1947 KDM1A  | ENST00000542151 | p.L646V | c.1936 | 0.092129049 | 0     | 1 |
| 1947 KDM1A  | ENST00000542151 | p.G824E | c.2471 | 0.028156848 | 6.394 | 1 |
| 1947 KDM1A  | ENST00000542151 | p.L231V | c.691  | 0.049392926 | 9.635 | 1 |
| 1947 KDM1A  | ENST00000542151 | p.V301G | c.902  | 0.075759588 | 4.376 | 1 |
| 1947 KDM1A  | ENST00000542151 | p.G310C | c.928  | 0.058589853 | 5.02  | 1 |
| 1948 INIP   | ENST00000374242 | p.A71T  | c.211  | 0.004117545 | 0     | 1 |

|             |                 |         |        |             |       |   |
|-------------|-----------------|---------|--------|-------------|-------|---|
| 1948 INIP   | ENST00000374242 | p.L95R  | c.284  | 0.004117545 | 7.924 | 1 |
| 1949 CFH    | ENST00000367429 | p.E359K | c.1075 | 0.028517672 | 5.132 | 1 |
| 1949 CFH    | ENST00000367429 | p.P364T | c.1090 | 0.013792234 | 6.18  | 1 |
| 1949 CFH    | ENST00000367429 | p.E433K | c.1297 | 0.042309906 | 0     | 1 |
| 1950 PPIC   | ENST00000306442 | p.L58F  | c.172  | 0.020336807 | 7.502 | 1 |
| 1950 PPIC   | ENST00000306442 | p.P204H | c.611  | 1.005516619 | 0     | 1 |
| 1950 PPIC   | ENST00000306442 | p.P204L | c.611  | 1.005516619 | 0     | 1 |
| 1951 BTRC   | ENST00000370187 | p.R419Q | c.1256 | 0.011990204 | 0     | 1 |
| 1951 BTRC   | ENST00000370187 | p.T455A | c.1363 | 0.011990204 | 6.382 | 1 |
| 1952 ACTN4  | ENST00000252699 | p.L126Q | c.377  | 0.065244495 | 0     | 1 |
| 1952 ACTN4  | ENST00000252699 | p.T148I | c.443  | 0.065244495 | 3.938 | 1 |
| 1953 NCAM2  | ENST00000400546 | p.S515F | c.1544 | 1.018925051 | 0     | 2 |
| 1953 NCAM2  | ENST00000400546 | p.V532L | c.1594 | 0.377062574 | 8.718 | 1 |
| 1953 NCAM2  | ENST00000400546 | p.V569L | c.1705 | 0.209422006 | 5.917 | 1 |
| 1954 ROCK1  | ENST00000399799 | p.R403C | c.1207 | 3.086967704 | 0     | 3 |
| 1954 ROCK1  | ENST00000399799 | p.R403H | c.1208 | 3.086967704 | 0     | 1 |
| 1954 ROCK1  | ENST00000399799 | p.A129T | c.385  | 0.30333839  | 3.721 | 1 |
| 1954 ROCK1  | ENST00000399799 | p.N26T  | c.77   | 0.044532425 | 6.489 | 1 |
| 1955 GUCA1C | ENST00000261047 | p.E87Q  | c.259  | 0.030290236 | 6.855 | 1 |
| 1955 GUCA1C | ENST00000261047 | p.E133K | c.397  | 0.043554661 | 8.799 | 1 |
| 1955 GUCA1C | ENST00000261047 | p.K141N | c.423  | 1.077762829 | 0     | 2 |
| 1955 GUCA1C | ENST00000261047 | p.D164Y | c.490  | 0.154008203 | 4.121 | 1 |
| 1955 GUCA1C | ENST00000261047 | p.V169F | c.505  | 0.106678295 | 6.732 | 1 |
| 1956 RAD1   | ENST00000382038 | p.A40V  | c.119  | 0.008668512 | 0     | 1 |
| 1956 RAD1   | ENST00000382038 | p.E140K | c.418  | 0.008668512 | 6.85  | 1 |
| 1957 CPA2   | ENST00000222481 | p.M411T | c.1232 | 0.060120466 | 4.056 | 1 |
| 1957 CPA2   | ENST00000222481 | p.T207I | c.620  | 0.060120466 | 0     | 1 |
| 1958 GAD1   | ENST00000358196 | p.D447N | c.1339 | 0.058760888 | 4.089 | 1 |
| 1958 GAD1   | ENST00000358196 | p.E217G | c.650  | 0.058760888 | 0     | 1 |
| 1959 NR1H2  | ENST00000593926 | p.Y334C | c.1001 | 0.00889987  | 0     | 1 |
| 1959 NR1H2  | ENST00000593926 | p.R266C | c.796  | 0.00889987  | 6.812 | 1 |
| 1960 HTR1B  | ENST00000369947 | p.T243M | c.728  | 1.23158845  | 3.119 | 2 |
| 1960 HTR1B  | ENST00000369947 | p.N245K | c.735  | 0.026777726 | 6.38  | 1 |
| 1960 HTR1B  | ENST00000369947 | p.R310C | c.928  | 1.242213262 | 0     | 1 |
| 1960 HTR1B  | ENST00000369947 | p.R310H | c.929  | 1.242213262 | 0     | 1 |
| 1961 SNAP25 | ENST00000304886 | p.R191T | c.572  | 0.021732531 | 0     | 1 |
| 1962 TREX2  | ENST00000334497 | p.V99I  | c.295  | 0.082772531 | 0     | 1 |
| 1962 TREX2  | ENST00000334497 | p.S124N | c.371  | 0.015562171 | 6.101 | 1 |
| 1962 TREX2  | ENST00000334497 | p.L128P | c.383  | 0.069197625 | 3.874 | 1 |
| 1963 PRKCQ  | ENST00000263125 | p.K451T | c.1352 | 0.067541137 | 9.495 | 1 |
| 1963 PRKCQ  | ENST00000263125 | p.E452K | c.1354 | 0.089273923 | 0     | 1 |
| 1963 PRKCQ  | ENST00000263125 | p.A678V | c.2033 | 0.068341716 | 3.901 | 1 |
| 1963 PRKCQ  | ENST00000263125 | p.M686V | c.2056 | 0.088506198 | 5.577 | 1 |
| 1964 GRB14  | ENST00000263915 | p.H242Y | c.724  | 0.103313616 | 0     | 1 |
| 1964 GRB14  | ENST00000263915 | p.G299R | c.895  | 0.005104552 | 7.614 | 1 |
| 1964 GRB14  | ENST00000263915 | p.P301L | c.902  | 0.098209065 | 3.348 | 1 |
| 1965 TERF1  | ENST00000276603 | p.L175S | c.524  | 0.041320456 | 0     | 1 |
| 1965 TERF1  | ENST00000276603 | p.H230Q | c.690  | 0.041320456 | 4.597 | 1 |
| 1966 CCS    | ENST00000533244 | p.H130N | c.388  | 0.244361223 | 0     | 1 |

|              |                 |         |        |             |       |   |
|--------------|-----------------|---------|--------|-------------|-------|---|
| 1966 CCS     | ENST00000533244 | p.G135R | c.403  | 0.225100187 | 7.727 | 1 |
| 1966 CCS     | ENST00000533244 | p.S197T | c.590  | 0.159039926 | 3.84  | 1 |
| 1966 CCS     | ENST00000533244 | p.D205Y | c.613  | 0.181668748 | 2.558 | 1 |
| 1967 IGF2BP1 | ENST00000290341 | p.Q409H | c.1227 | 0.032841507 | 7.231 | 1 |
| 1967 IGF2BP1 | ENST00000290341 | p.R452C | c.1354 | 3.006656594 | 0     | 3 |
| 1967 IGF2BP1 | ENST00000290341 | p.R452G | c.1354 | 3.006656594 | 0     | 1 |
| 1968 ADH1A   | ENST00000209668 | p.V77A  | c.230  | 0.015030116 | 7.056 | 1 |
| 1968 ADH1A   | ENST00000209668 | p.L124M | c.370  | 0.174226213 | 6.157 | 1 |
| 1968 ADH1A   | ENST00000209668 | p.D154V | c.461  | 1.023577743 | 0     | 2 |
| 1968 ADH1A   | ENST00000209668 | p.E155K | c.463  | 0.150296073 | 8.931 | 1 |
| 1970 PARN    | ENST00000437198 | p.Y384H | c.1150 | 0.011179504 | 6.483 | 1 |
| 1970 PARN    | ENST00000437198 | p.D28H  | c.82   | 0.014918846 | 0     | 1 |
| 1970 PARN    | ENST00000437198 | p.V293A | c.878  | 0.003739342 | 8.063 | 1 |
| 1971 CD274   | ENST00000381577 | p.Q156H | c.468  | 0.005900284 | 7.405 | 1 |
| 1971 CD274   | ENST00000381577 | p.V225A | c.674  | 0.005900284 | 0     | 1 |
| 1972 GAS6    | ENST00000357389 | p.E374K | c.1120 | 0.129497845 | 3.949 | 1 |
| 1972 GAS6    | ENST00000357389 | p.V327M | c.979  | 1.064748923 | 0     | 2 |
| 1973 UBXN7   | ENST00000296328 | p.R451C | c.1351 | 0.084027187 | 3.573 | 1 |
| 1973 UBXN7   | ENST00000296328 | p.N489K | c.1467 | 0.084027187 | 0     | 1 |
| 1974 CXCL14  | ENST00000337225 | p.S40F  | c.119  | 0.47467106  | 2.075 | 1 |
| 1974 CXCL14  | ENST00000337225 | p.R94C  | c.280  | 1.23733553  | 0     | 1 |
| 1974 CXCL14  | ENST00000337225 | p.R94H  | c.281  | 1.23733553  | 0     | 1 |
| 1975 EPHB4   | ENST00000358173 | p.S642C | c.1924 | 0.020263118 | 0     | 1 |
| 1975 EPHB4   | ENST00000358173 | p.R678H | c.2033 | 0.020263118 | 5.625 | 1 |
| 1976 A2M     | ENST00000318602 | p.F572L | c.1716 | 0.099718155 | 0     | 1 |
| 1976 A2M     | ENST00000318602 | p.S785P | c.2353 | 0.099718155 | 3.326 | 1 |
| 1977 SI      | ENST00000264382 | p.E613V | c.1838 | 0.137250504 | 0     | 1 |
| 1977 SI      | ENST00000264382 | p.L645F | c.1933 | 0.025875804 | 7.172 | 1 |
| 1977 SI      | ENST00000264382 | p.T732I | c.2195 | 0.066869278 | 3.997 | 1 |
| 1977 SI      | ENST00000264382 | p.L746V | c.2236 | 0.093994307 | 3.885 | 1 |
| 1978 GRM1    | ENST00000282753 | p.M41I  | c.123  | 0.09030815  | 3.469 | 1 |
| 1978 GRM1    | ENST00000282753 | p.D87H  | c.259  | 0.09030815  | 0     | 1 |
| 1979 ORM1    | ENST00000259396 | p.R51Q  | c.152  | 0.126861531 | 0     | 1 |
| 1979 ORM1    | ENST00000259396 | p.K138N | c.414  | 0.099200702 | 3.377 | 1 |
| 1979 ORM1    | ENST00000259396 | p.R167H | c.500  | 0.033552939 | 5.03  | 1 |
| 1980 SRPK1   | ENST00000361690 | p.P498L | c.1493 | 0.021687386 | 5.527 | 1 |
| 1980 SRPK1   | ENST00000361690 | p.L188R | c.563  | 0.021687386 | 0     | 1 |
| 1981 FTH1    | ENST00000273550 | p.Y40H  | c.118  | 0.104005558 | 7.303 | 1 |
| 1981 FTH1    | ENST00000273550 | p.E95D  | c.285  | 0.33800236  | 3.52  | 1 |
| 1981 FTH1    | ENST00000273550 | p.A161T | c.481  | 1.100688004 | 0     | 1 |
| 1981 FTH1    | ENST00000273550 | p.A161V | c.482  | 1.100688004 | 0     | 1 |
| 1981 FTH1    | ENST00000273550 | p.A167V | c.500  | 0.102766867 | 7.121 | 1 |
| 1982 CAT     | ENST00000241052 | p.R127Q | c.380  | 0.034493486 | 6.425 | 1 |
| 1982 CAT     | ENST00000241052 | p.P206S | c.616  | 0.108448625 | 3.339 | 1 |
| 1982 CAT     | ENST00000241052 | p.L245F | c.733  | 0.110461745 | 0     | 1 |
| 1983 CLK3    | ENST00000395066 | p.I350V | c.1048 | 0.025665959 | 5.284 | 1 |
| 1983 CLK3    | ENST00000395066 | p.K457N | c.1371 | 0.025665959 | 0     | 1 |
| 1984 DPYSL5  | ENST00000288699 | p.R489P | c.1466 | 0.151669195 | 3.721 | 1 |
| 1984 DPYSL5  | ENST00000288699 | p.A291V | c.872  | 1.075834598 | 0     | 2 |



|             |                 |         |             |             |       |   |
|-------------|-----------------|---------|-------------|-------------|-------|---|
| 1985 PRIM1  | ENST00000338193 | p.F352L | c.1056      | 0.080214119 | 3.64  | 1 |
| 1985 PRIM1  | ENST00000338193 | p.M1I   | c.3         | 0.080214119 | 0     | 1 |
| 1986 ACO1   | ENST00000379923 | p.A725V | c.2174      | 0.021838234 | 0     | 1 |
| 1986 ACO1   | ENST00000379923 | p.V752E | c.2255      | 0.021838234 | 5.517 | 1 |
| 1987 RNH1   | ENST00000438658 | p.G186D | c.557       | 0.060148729 | 6.592 | 1 |
| 1987 RNH1   | ENST00000438658 | p.K205R | c.614       | 0.167848242 | 2.768 | 1 |
| 1987 RNH1   | ENST00000438658 | p.S208I | c.623       | 0.200733719 | 2.911 | 1 |
| 1987 RNH1   | ENST00000438658 | p.S236I | c.707       | 0.290127808 | 0     | 1 |
| 1988 MB21D1 | ENST00000370315 | p.I386N | c.1157      | 0.009538645 | 6.712 | 1 |
| 1988 MB21D1 | ENST00000370315 | p.D408N | c.1222      | 0.012603777 | 6.31  | 1 |
| 1988 MB21D1 | ENST00000370315 | p.F442V | c.1324      | 0.022142422 | 0     | 1 |
| 1989 IRAK4  | ENST00000448290 | p.E194Q | c.580       | 0.006619785 | 0     | 1 |
| 1989 IRAK4  | ENST00000448290 | p.M218I | c.654       | 0.006619785 | 7.239 | 1 |
| 1990 SORCS2 | ENST00000507866 | p.P780S | c.2338      | 0.311133045 | 2.235 | 1 |
| 1990 SORCS2 | ENST00000507866 | p.R781Q | c.2342      | 0.226981207 | 2.991 | 1 |
| 1990 SORCS2 | ENST00000507866 | p.G809S | c.2425      | 0.161765977 | 6.031 | 1 |
| 1990 SORCS2 | ENST00000507866 | p.D861N | c.2581      | 0.353496316 | 0     | 1 |
| 1991 PTPRM  | ENST00000400060 | p.V120L | c.358       | 0.112476921 | 0     | 1 |
| 1991 PTPRM  | ENST00000400060 | p.S148I | c.443       | 0.033293439 | 6.486 | 1 |
| 1991 PTPRM  | ENST00000400060 | p.T149P | c.445       | 0.11096469  | 3.303 | 1 |
| 1992 ITGAV  | ENST00000261023 | p.D682N | c.2044      | 0.049897272 | 4.503 | 1 |
| 1992 ITGAV  | ENST00000261023 | p.G685R | c.2053      | 0.137191516 | 2.928 | 1 |
| 1992 ITGAV  | ENST00000261023 | p.R728C | c.2182      | 0.175498984 | 0     | 1 |
| 1993 MAPK8  | ENST00000374189 | p.R189C | c.565       | 2.232295897 | 0     | 1 |
| 1993 MAPK8  | ENST00000374189 | p.R189H | c.566       | 2.232295897 | 0     | 1 |
| 1993 MAPK8  | ENST00000374189 | p.R189L | c.566       | 2.232295897 | 0     | 1 |
| 1993 MAPK8  | ENST00000374189 | p.L198F | c.592       | 0.10164436  | 7.803 | 1 |
| 1993 MAPK8  | ENST00000374189 | p.G199D | c.596       | 0.075962782 | 8.23  | 1 |
| 1993 MAPK8  | ENST00000374189 | p.I231V | c.691       | 0.058230599 | 5.783 | 1 |
| 1994 GLUD1  | ENST00000277865 | p.D461E | c.1383      | 0.095169705 | 0     | 1 |
| 1994 GLUD1  | ENST00000277865 | p.R496M | c.1487      | 0.086269835 | 3.535 | 1 |
| 1994 GLUD1  | ENST00000277865 | p.R274H | c.821       | 0.016394121 | 6.812 | 1 |
| 1995 CYP7A1 | ENST00000301645 | p.E453K | c.1357      | 0.097395572 | 4.36  | 1 |
| 1995 CYP7A1 | ENST00000301645 | p.S286L | c.857       | 1.048697786 | 0     | 2 |
| 1996 NLRX1  | ENST00000292199 | p.R743H | c.2228      | 1.001992783 | 0     | 2 |
| 1996 NLRX1  | ENST00000292199 | p.P764H | c.2291      | 0.028065912 | 8.971 | 1 |
| 1997 C6     | ENST00000263413 | p.L345V | c.1033      | 0.113125808 | 0     | 1 |
| 1997 C6     | ENST00000263413 | p.K503T | c.1508      | 0.113125808 | 3.144 | 1 |
| 1998 PKLR   | ENST00000342741 | p.P414F | c.1241_1240 | 0.007720982 | 0     | 1 |
| 1998 PKLR   | ENST00000342741 | p.P96S  | c.286       | 0.007720982 | 7.017 | 1 |
| 1999 GC     | ENST00000504199 | p.D269N | c.805       | 0.012595044 | 6.311 | 1 |
| 1999 GC     | ENST00000504199 | p.A274T | c.820       | 0.012841878 | 6.283 | 1 |
| 1999 GC     | ENST00000504199 | p.L304H | c.911       | 0.025436922 | 0     | 1 |
| 2000 EXOSC5 | ENST00000221233 | p.T52I  | c.155       | 0.119559917 | 0     | 1 |
| 2000 EXOSC5 | ENST00000221233 | p.A136V | c.407       | 0.005284856 | 9.123 | 1 |
| 2000 EXOSC5 | ENST00000221233 | p.R29W  | c.85        | 0.117766409 | 3.086 | 1 |
| 2001 UBE2V2 | ENST00000518360 | p.D46G  | c.137       | 0.268556933 | 2.057 | 1 |
| 2001 UBE2V2 | ENST00000518360 | p.P78L  | c.233       | 0.289857967 | 3.309 | 1 |
| 2002 F9     | ENST00000218099 | p.V419L | c.1255      | 0.180337843 | 0     | 1 |

|              |                 |         |        |             |       |   |
|--------------|-----------------|---------|--------|-------------|-------|---|
| 2002 F9      | ENST00000218099 | p.G139S | c.415  | 0.07612716  | 3.841 | 1 |
| 2002 F9      | ENST00000218099 | p.E142D | c.426  | 0.011202775 | 6.48  | 1 |
| 2002 F9      | ENST00000218099 | p.Q143R | c.428  | 0.075634715 | 3.851 | 1 |
| 2002 F9      | ENST00000218099 | p.E159D | c.477  | 0.008425628 | 6.891 | 1 |
| 2002 F9      | ENST00000218099 | p.G179R | c.535  | 0.024635315 | 5.531 | 1 |
| 2003 IL21R   | ENST00000395755 | p.C35F  | c.104  | 0.01770866  | 6.611 | 1 |
| 2003 IL21R   | ENST00000395755 | p.C81Y  | c.242  | 0.137063173 | 0     | 1 |
| 2003 IL21R   | ENST00000395755 | p.V33I  | c.97   | 0.13463257  | 2.979 | 1 |
| 2004 RHCG    | ENST00000268122 | p.T401A | c.1201 | 0.227282472 | 0     | 1 |
| 2004 RHCG    | ENST00000268122 | p.N165D | c.493  | 0.120643329 | 3.206 | 1 |
| 2004 RHCG    | ENST00000268122 | p.M182I | c.546  | 0.175279906 | 3.142 | 1 |
| 2004 RHCG    | ENST00000268122 | p.T295I | c.884  | 0.055353565 | 7.472 | 1 |
| 2005 C6      | ENST00000263413 | p.A500E | c.1499 | 0.082469244 | 0     | 1 |
| 2005 C6      | ENST00000263413 | p.D626N | c.1876 | 0.082469244 | 3.6   | 1 |
| 2006 HNRNPM  | ENST00000325495 | p.G203V | c.608  | 0.013129902 | 0     | 1 |
| 2006 HNRNPM  | ENST00000325495 | p.E280K | c.838  | 0.013129902 | 6.251 | 1 |
| 2007 TF      | ENST00000402696 | p.K61E  | c.181  | 0.021436524 | 6.368 | 1 |
| 2007 TF      | ENST00000402696 | p.N129K | c.387  | 0.019024469 | 5.716 | 1 |
| 2007 TF      | ENST00000402696 | p.C246Y | c.737  | 0.031131593 | 0     | 1 |
| 2008 PKLR    | ENST00000342741 | p.K348N | c.1044 | 0.010679589 | 0     | 1 |
| 2008 PKLR    | ENST00000342741 | p.A423V | c.1268 | 0.010679589 | 6.549 | 1 |
| 2009 MAPK10  | ENST00000359221 | p.R258C | c.772  | 0.121581868 | 0     | 1 |
| 2009 MAPK10  | ENST00000359221 | p.F313L | c.939  | 0.121581868 | 3.04  | 1 |
| 2010 TLR4    | ENST00000355622 | p.Q423H | c.1269 | 0.060203868 | 4.054 | 1 |
| 2010 TLR4    | ENST00000355622 | p.N448H | c.1342 | 0.060203868 | 0     | 1 |
| 2011 CNDP1   | ENST00000358821 | p.G351E | c.1052 | 0.136313467 | 0     | 1 |
| 2011 CNDP1   | ENST00000358821 | p.K372Q | c.1114 | 0.136313467 | 2.875 | 1 |
| 2012 AKR1B1  | ENST00000285930 | p.M1I   | c.3    | 0.21634401  | 0     | 1 |
| 2012 AKR1B1  | ENST00000285930 | p.R251Q | c.752  | 0.161574378 | 2.72  | 1 |
| 2012 AKR1B1  | ENST00000285930 | p.N257D | c.769  | 0.074369666 | 3.953 | 1 |
| 2013 CRYZ    | ENST00000340866 | p.G102V | c.305  | 0.029666941 | 6.075 | 1 |
| 2013 CRYZ    | ENST00000340866 | p.L327F | c.979  | 1.014833471 | 0     | 1 |
| 2013 CRYZ    | ENST00000340866 | p.L327I | c.979  | 1.014833471 | 0     | 1 |
| 2014 CTSG    | ENST00000216336 | p.R48T  | c.143  | 0.568802614 | 1.814 | 1 |
| 2014 CTSG    | ENST00000216336 | p.D200N | c.598  | 1.284401307 | 0     | 2 |
| 2015 CTSF    | ENST00000310325 | p.G454S | c.1360 | 0.083968964 | 3.574 | 1 |
| 2015 CTSF    | ENST00000310325 | p.S480L | c.1439 | 0.00882615  | 6.824 | 1 |
| 2015 CTSF    | ENST00000310325 | p.V286L | c.856  | 0.092795114 | 0     | 1 |
| 2016 MRE11A  | ENST00000407439 | p.R367Q | c.1100 | 0.073312991 | 0     | 1 |
| 2016 MRE11A  | ENST00000407439 | p.H400Y | c.1198 | 0.065698307 | 3.928 | 1 |
| 2016 MRE11A  | ENST00000407439 | p.S276F | c.827  | 0.007614685 | 7.037 | 1 |
| 2017 IFNL3   | ENST00000413851 | p.L102P | c.305  | 0.158501759 | 0     | 1 |
| 2017 IFNL3   | ENST00000413851 | p.L133F | c.397  | 0.105248952 | 3.331 | 1 |
| 2017 IFNL3   | ENST00000413851 | p.R134Q | c.401  | 0.065004399 | 4.08  | 1 |
| 2018 TDRD3   | ENST00000196169 | p.E204K | c.610  | 0.003266587 | 0     | 1 |
| 2018 TDRD3   | ENST00000196169 | p.L230V | c.688  | 0.003266587 | 8.258 | 1 |
| 2019 ANXA6   | ENST00000354546 | p.R358H | c.1073 | 1.068109507 | 0     | 2 |
| 2019 ANXA6   | ENST00000354546 | p.R393C | c.1177 | 0.136219014 | 3.876 | 1 |
| 2020 ALDH4A1 | ENST00000290597 | p.S389C | c.1166 | 0.022421086 | 5.479 | 1 |

|              |                 |                    |           |             |       |   |
|--------------|-----------------|--------------------|-----------|-------------|-------|---|
| 2020 ALDH4A1 | ENST00000290597 | p.V425M            | c.1273    | 0.033169475 | 4.914 | 1 |
| 2020 ALDH4A1 | ENST00000290597 | p.P84S             | c.250     | 0.055590562 | 0     | 1 |
| 2021 NCBP2   | ENST00000321256 | p.R109Q            | c.326     | 0.035550163 | 4.814 | 1 |
| 2021 NCBP2   | ENST00000321256 | p.I110M            | c.330     | 0.008071206 | 6.953 | 1 |
| 2021 NCBP2   | ENST00000321256 | p.R135W            | c.403     | 0.04362137  | 0     | 1 |
| 2022 MAPK10  | ENST00000359221 | p.Q75H             | c.225     | 0.144424141 | 0     | 1 |
| 2022 MAPK10  | ENST00000359221 | p.S96R             | c.288     | 0.131430769 | 2.949 | 1 |
| 2022 MAPK10  | ENST00000359221 | p.R212S            | c.636     | 0.038910404 | 6.066 | 1 |
| 2023 PON1    | ENST00000542556 | p.P95T             | c.283     | 0.041868238 | 0     | 1 |
| 2023 PON1    | ENST00000542556 | p.L143S            | c.428     | 0.041868238 | 4.578 | 1 |
| 2024 PCLO    | ENST00000333891 | p.P848S            | c.2542    | 0.473392097 | 2.003 | 1 |
| 2024 PCLO    | ENST00000333891 | p.G886V            | c.2657    | 0.491132204 | 0     | 1 |
| 2024 PCLO    | ENST00000333891 | p.A915S            | c.2743    | 0.465562942 | 2.049 | 1 |
| 2025 APPL1   | ENST00000288266 | p.P567T            | c.1699    | 0.010068552 | 6.634 | 1 |
| 2025 APPL1   | ENST00000288266 | p.R589Q            | c.1766    | 0.010068552 | 0     | 1 |
| 2026 HMGCS2  | ENST00000369406 | p.S123F            | c.368     | 0.103808753 | 3.268 | 1 |
| 2026 HMGCS2  | ENST00000369406 | p.G153C            | c.457     | 0.007134361 | 7.131 | 1 |
| 2026 HMGCS2  | ENST00000369406 | p.R188H            | c.563     | 0.110943114 | 0     | 1 |
| 2027 TOP2B   | ENST00000264331 | p.N576H            | c.1726    | 0.006857983 | 7.188 | 1 |
| 2027 TOP2B   | ENST00000264331 | p.A669S            | c.2005    | 0.008076803 | 6.952 | 1 |
| 2027 TOP2B   | ENST00000264331 | p.F719L            | c.2157    | 0.014934785 | 0     | 1 |
| 2028 CASP9   | ENST00000546424 | p.V343M            | c.1027    | 0.178951369 | 3.57  | 1 |
| 2028 CASP9   | ENST00000546424 | p.Y345C            | c.1034    | 0.023395793 | 7.244 | 1 |
| 2028 CASP9   | ENST00000546424 | p.R180H            | c.539     | 1.09079898  | 0     | 2 |
| 2029 CASP9   | ENST00000546424 | p.Q373H            | c.1119    | 0.014833471 | 6.075 | 1 |
| 2029 CASP9   | ENST00000546424 | p.W374R            | c.1120    | 0.005016859 | 7.639 | 1 |
| 2029 CASP9   | ENST00000546424 | p.R193H            | c.578     | 0.019850329 | 0     | 1 |
| 2030 C6      | ENST00000263413 | p.Y184H            | c.550     | 0.019011287 | 0     | 1 |
| 2030 C6      | ENST00000263413 | p.K219E            | c.655     | 0.019011287 | 5.717 | 1 |
| 2031 IL12B   | ENST00000231228 | p.Q276E            | c.826     | 0.086956505 | 0     | 1 |
| 2031 IL12B   | ENST00000231228 | p.V308M            | c.922     | 0.051131767 | 4.343 | 1 |
| 2031 IL12B   | ENST00000231228 | p.R309W            | c.925     | 0.039538251 | 4.73  | 1 |
| 2032 PTPN2   | ENST00000309660 | p.R114H            | c.341     | 0.101040109 | 3.307 | 1 |
| 2032 PTPN2   | ENST00000309660 | p.R222H            | c.665     | 0.101040109 | 0     | 1 |
| 2033 CNNM4   | ENST00000377075 | p.R407H            | c.1220    | 0.0054369   | 7.523 | 1 |
| 2033 CNNM4   | ENST00000377075 | p.F451V            | c.1351    | 0.025648175 | 5.285 | 1 |
| 2033 CNNM4   | ENST00000377075 | p.A473V            | c.1418    | 0.031085075 | 0     | 1 |
| 2034 PNMT    | ENST00000269582 | p.A181V            | c.542     | 0.033423346 | 4.903 | 1 |
| 2034 PNMT    | ENST00000269582 | p.L213in_frame_del | c.630_632 | 0.033423346 | 0     | 1 |
| 2035 CNOT1   | ENST00000317147 | p.P2162S           | c.6484    | 0.01025165  | 0     | 1 |
| 2035 CNOT1   | ENST00000317147 | p.P2277T           | c.6829    | 0.01025165  | 6.608 | 1 |
| 2036 PLAUR   | ENST00000340093 | p.E59K             | c.175     | 0.019436799 | 6.441 | 1 |
| 2036 PLAUR   | ENST00000340093 | p.T108I            | c.323     | 0.010117523 | 6.627 | 1 |
| 2036 PLAUR   | ENST00000340093 | p.R138H            | c.413     | 0.021627271 | 0     | 1 |
| 2037 FLNB    | ENST00000490882 | p.A1656T           | c.4966    | 0.026405825 | 5.243 | 1 |
| 2037 FLNB    | ENST00000490882 | p.T1682M           | c.5045    | 0.010280113 | 6.604 | 1 |
| 2037 FLNB    | ENST00000490882 | p.F1731V           | c.5191    | 0.036685938 | 0     | 1 |
| 2038 F5      | ENST00000367796 | p.L178M            | c.532     | 0.123948329 | 0     | 1 |
| 2038 F5      | ENST00000367796 | p.N1890H           | c.5668    | 0.113088981 | 3.162 | 1 |

|      |         |                 |          |        |             |       |   |
|------|---------|-----------------|----------|--------|-------------|-------|---|
| 2038 | F5      | ENST00000367796 | p.A291D  | c.872  | 0.01359102  | 6.354 | 1 |
| 2039 | EPHB1   | ENST00000398015 | p.E613D  | c.1839 | 0.003472042 | 9.17  | 1 |
| 2039 | EPHB1   | ENST00000398015 | p.V616A  | c.1847 | 0.021123607 | 6.565 | 1 |
| 2039 | EPHB1   | ENST00000398015 | p.R691W  | c.2071 | 1.012297824 | 0     | 1 |
| 2039 | EPHB1   | ENST00000398015 | p.R691Q  | c.2072 | 1.012297824 | 0     | 1 |
| 2040 | IL13RA1 | ENST00000371666 | p.L243I  | c.727  | 0.162761349 | 2.749 | 1 |
| 2040 | IL13RA1 | ENST00000371666 | p.N273D  | c.817  | 0.015232448 | 6.336 | 1 |
| 2040 | IL13RA1 | ENST00000371666 | p.F275L  | c.825  | 0.094964544 | 3.612 | 1 |
| 2040 | IL13RA1 | ENST00000371666 | p.V299F  | c.895  | 0.24291876  | 0     | 1 |
| 2041 | XPO1    | ENST00000404992 | p.Y469C  | c.1406 | 0.145151238 | 0     | 1 |
| 2041 | XPO1    | ENST00000404992 | p.A507S  | c.1519 | 0.046419775 | 5.303 | 1 |
| 2041 | XPO1    | ENST00000404992 | p.D512G  | c.1535 | 0.132523625 | 3.075 | 1 |
| 2041 | XPO1    | ENST00000404992 | p.R553C  | c.1657 | 0.143457461 | 9.76  | 1 |
| 2042 | CNOT1   | ENST00000317147 | p.R2197H | c.6590 | 1.148753962 | 0     | 2 |
| 2042 | CNOT1   | ENST00000317147 | p.D2257G | c.6770 | 0.297507924 | 2.749 | 1 |
| 2043 | FLNC    | ENST00000325888 | p.D1538H | c.4612 | 0.120491226 | 3.053 | 1 |
| 2043 | FLNC    | ENST00000325888 | p.G1570D | c.4709 | 0.120491226 | 0     | 1 |
| 2044 | GGCT    | ENST00000275428 | p.P75H   | c.224  | 0.078815174 | 5.256 | 1 |
| 2044 | GGCT    | ENST00000275428 | p.G103A  | c.308  | 1.026168953 | 0     | 1 |
| 2044 | GGCT    | ENST00000275428 | p.G103E  | c.308  | 1.026168953 | 0     | 1 |
| 2045 | CRADD   | ENST00000332896 | p.R147C  | c.439  | 0.011422324 | 6.452 | 1 |
| 2045 | CRADD   | ENST00000332896 | p.R170H  | c.509  | 0.016484593 | 0     | 1 |
| 2045 | CRADD   | ENST00000332896 | p.P191S  | c.571  | 0.005062269 | 7.626 | 1 |
| 2046 | BCHE    | ENST00000264381 | p.T36K   | c.107  | 0.080020043 | 3.733 | 1 |
| 2046 | BCHE    | ENST00000264381 | p.K37N   | c.111  | 0.049091715 | 4.997 | 1 |
| 2046 | BCHE    | ENST00000264381 | p.P132T  | c.394  | 0.07346428  | 4.935 | 1 |
| 2046 | BCHE    | ENST00000264381 | p.A212D  | c.635  | 0.139211644 | 0     | 1 |
| 2048 | PROCR   | ENST00000216968 | p.A148V  | c.443  | 0.010517969 | 0     | 1 |
| 2048 | PROCR   | ENST00000216968 | p.Y171H  | c.511  | 0.010517969 | 6.571 | 1 |
| 2049 | AZGP1   | ENST00000292401 | p.V44D   | c.131  | 0.084523879 | 0     | 1 |
| 2049 | AZGP1   | ENST00000292401 | p.D95N   | c.283  | 0.074531805 | 3.746 | 1 |
| 2049 | AZGP1   | ENST00000292401 | p.S114F  | c.341  | 0.009992075 | 6.645 | 1 |
| 2050 | SMARCA4 | ENST00000358026 | p.K1493N | c.4479 | 0.260100157 | 0     | 1 |
| 2050 | SMARCA4 | ENST00000358026 | p.R1552H | c.4655 | 0.168820083 | 2.714 | 1 |
| 2050 | SMARCA4 | ENST00000358026 | p.D1600N | c.4798 | 0.124106466 | 3.215 | 1 |
| 2051 | ASH1L   | ENST00000368346 | p.S2089F | c.6266 | 0.012335842 | 6.341 | 1 |
| 2051 | ASH1L   | ENST00000368346 | p.D2204Y | c.6610 | 0.012335842 | 0     | 1 |
| 2052 | TGFBR1  | ENST00000552516 | p.I369V  | c.1105 | 0.091378591 | 0     | 1 |
| 2052 | TGFBR1  | ENST00000552516 | p.F400L  | c.1200 | 0.091378591 | 3.452 | 1 |
| 2053 | UNG     | ENST00000242576 | p.G158V  | c.473  | 0.185950712 | 3.441 | 1 |
| 2053 | UNG     | ENST00000242576 | p.Q170E  | c.508  | 0.066928871 | 5.681 | 1 |
| 2053 | UNG     | ENST00000242576 | p.R269W  | c.805  | 1.11156963  | 0     | 2 |
| 2054 | CDKL1   | ENST00000395834 | p.L37M   | c.109  | 0.113528472 | 0     | 1 |
| 2054 | CDKL1   | ENST00000395834 | p.G14E   | c.41   | 0.023970488 | 5.509 | 1 |
| 2054 | CDKL1   | ENST00000395834 | p.S15T   | c.43   | 0.09692643  | 3.449 | 1 |
| 2056 | STAMBP  | ENST00000394070 | p.F376L  | c.1128 | 0.007598867 | 7.04  | 1 |
| 2056 | STAMBP  | ENST00000394070 | p.L285I  | c.853  | 0.007598867 | 0     | 1 |
| 2057 | SRP68   | ENST00000307877 | p.W135C  | c.405  | 0.027432617 | 7.399 | 1 |
| 2057 | SRP68   | ENST00000307877 | p.R152Q  | c.455  | 0.112578247 | 3.151 | 1 |

|              |                 |          |        |             |       |   |
|--------------|-----------------|----------|--------|-------------|-------|---|
| 2057 SRP68   | ENST00000307877 | p.E200Q  | c.598  | 0.118503121 | 0     | 1 |
| 2058 CAT     | ENST00000241052 | p.K349N  | c.1047 | 0.060673472 | 6.572 | 1 |
| 2058 CAT     | ENST00000241052 | p.Q352H  | c.1056 | 0.101467145 | 3.316 | 1 |
| 2058 CAT     | ENST00000241052 | p.R430W  | c.1288 | 0.022065617 | 6.924 | 1 |
| 2058 CAT     | ENST00000241052 | p.P49H   | c.146  | 0.11915752  | 0     | 1 |
| 2059 MX1     | ENST00000398600 | p.R402W  | c.1204 | 1.010180837 | 0     | 2 |
| 2059 MX1     | ENST00000398600 | p.M479V  | c.1435 | 0.035085312 | 6.618 | 1 |
| 2060 HDC     | ENST00000267845 | p.Q375E  | c.1123 | 0.094031741 | 3.646 | 1 |
| 2060 HDC     | ENST00000267845 | p.H377D  | c.1129 | 0.009303569 | 6.748 | 1 |
| 2060 HDC     | ENST00000267845 | p.M126R  | c.377  | 0.040556355 | 5.243 | 1 |
| 2060 HDC     | ENST00000267845 | p.C283Y  | c.848  | 0.115590604 | 0     | 1 |
| 2061 CDK8    | ENST00000381527 | p.D103N  | c.307  | 0.059870951 | 4.062 | 1 |
| 2061 CDK8    | ENST00000381527 | p.A155V  | c.464  | 0.059870951 | 0     | 1 |
| 2062 AIM1    | ENST00000369066 | p.R1414Q | c.4241 | 0.08355952  | 3.87  | 1 |
| 2062 AIM1    | ENST00000369066 | p.G1453S | c.4357 | 0.23691524  | 2.173 | 1 |
| 2062 AIM1    | ENST00000369066 | p.F1494C | c.4481 | 0.290142433 | 0     | 1 |
| 2063 PPM1A   | ENST00000325642 | p.R354Q  | c.1061 | 0.267016352 | 2.905 | 1 |
| 2063 PPM1A   | ENST00000325642 | p.R106C  | c.316  | 1.133508176 | 0     | 1 |
| 2063 PPM1A   | ENST00000325642 | p.R106H  | c.317  | 1.133508176 | 0     | 1 |
| 2064 SCML2   | ENST00000251900 | p.P113S  | c.337  | 0.010613174 | 6.558 | 1 |
| 2064 SCML2   | ENST00000251900 | p.K161N  | c.483  | 0.010613174 | 0     | 1 |
| 2065 EIF2AK3 | ENST00000303236 | p.P993R  | c.2978 | 0.050695447 | 4.302 | 1 |
| 2065 EIF2AK3 | ENST00000303236 | p.P1060T | c.3178 | 0.050695447 | 0     | 1 |
| 2066 MAPK8   | ENST00000374189 | p.R150W  | c.448  | 0.029116888 | 5.102 | 1 |
| 2066 MAPK8   | ENST00000374189 | p.T183M  | c.548  | 0.029116888 | 0     | 1 |
| 2067 MEP1B   | ENST00000269202 | p.R146Q  | c.437  | 0.113030842 | 3.354 | 1 |
| 2067 MEP1B   | ENST00000269202 | p.H210Y  | c.628  | 0.170946546 | 2.683 | 1 |
| 2067 MEP1B   | ENST00000269202 | p.R238Q  | c.713  | 0.25351865  | 0     | 1 |
| 2068 CD84    | ENST00000311224 | p.S59F   | c.176  | 0.003393524 | 9.203 | 1 |
| 2068 CD84    | ENST00000311224 | p.R84W   | c.250  | 1.001696762 | 0     | 1 |
| 2068 CD84    | ENST00000311224 | p.R84Q   | c.251  | 1.001696762 | 0     | 1 |
| 2069 ADH5    | ENST00000296412 | p.K373N  | c.1119 | 0.084096315 | 3.618 | 1 |
| 2069 ADH5    | ENST00000296412 | p.S147F  | c.440  | 0.113978622 | 0     | 1 |
| 2069 ADH5    | ENST00000296412 | p.E24K   | c.70   | 0.035181543 | 4.942 | 1 |
| 2070 SMYD2   | ENST00000366957 | p.C209Y  | c.626  | 0.123415373 | 3.044 | 1 |
| 2070 SMYD2   | ENST00000366957 | p.R250I  | c.749  | 0.139143956 | 0     | 1 |
| 2070 SMYD2   | ENST00000366957 | p.R299C  | c.895  | 0.020068851 | 5.804 | 1 |
| 2071 FSHB    | ENST00000417547 | p.T68S   | c.202  | 0.007089993 | 7.14  | 1 |
| 2071 FSHB    | ENST00000417547 | p.K72E   | c.214  | 0.065384194 | 4.038 | 1 |
| 2071 FSHB    | ENST00000417547 | p.C100F  | c.299  | 0.142033558 | 0     | 1 |
| 2071 FSHB    | ENST00000417547 | p.E22V   | c.65   | 0.078577226 | 3.755 | 1 |
| 2072 CTSC    | ENST00000227266 | p.G430V  | c.1289 | 0.028203148 | 0     | 1 |
| 2072 CTSC    | ENST00000227266 | p.Q252E  | c.754  | 0.028203148 | 5.148 | 1 |
| 2073 CAND1   | ENST00000545606 | p.V261L  | c.781  | 0.044916956 | 0     | 1 |
| 2073 CAND1   | ENST00000545606 | p.Y291C  | c.872  | 0.041009588 | 6.941 | 1 |
| 2073 CAND1   | ENST00000545606 | p.H293Y  | c.877  | 0.036778336 | 4.765 | 1 |
| 2074 MARK2   | ENST00000402010 | p.R153Q  | c.458  | 0.004635691 | 8.753 | 1 |
| 2074 MARK2   | ENST00000402010 | p.E309K  | c.925  | 1.002317845 | 0     | 2 |
| 2075 SI      | ENST00000264382 | p.M119T  | c.356  | 0.008275143 | 6.917 | 1 |

|              |                 |          |           |             |       |   |
|--------------|-----------------|----------|-----------|-------------|-------|---|
| 2075 SI      | ENST00000264382 | p.K193N  | c.579     | 0.008275143 | 0     | 1 |
| 2076 NUP43   | ENST00000340413 | p.T235A  | c.703     | 0.053965013 | 8.424 | 1 |
| 2076 NUP43   | ENST00000340413 | p.L242F  | c.726     | 0.13412737  | 0     | 1 |
| 2076 NUP43   | ENST00000340413 | p.M264I  | c.792     | 0.114884363 | 3.892 | 1 |
| 2076 NUP43   | ENST00000340413 | p.L277V  | c.829     | 0.075987602 | 3.969 | 1 |
| 2077 ITPK1   | ENST00000267615 | p.R124M  | c.371     | 0.145490817 | 0     | 1 |
| 2077 ITPK1   | ENST00000267615 | p.E260K  | c.778     | 0.145490817 | 2.781 | 1 |
| 2078 KIF3B   | ENST00000375712 | p.R336H  | c.1007    | 1.197106118 | 0     | 2 |
| 2078 KIF3B   | ENST00000375712 | p.S280F  | c.839     | 0.374448387 | 2.425 | 1 |
| 2078 KIF3B   | ENST00000375712 | p.A281S  | c.841     | 0.023821891 | 6.52  | 1 |
| 2079 DAO     | ENST00000228476 | p.K337T  | c.1010    | 1.155729755 | 0     | 1 |
| 2079 DAO     | ENST00000228476 | p.K337N  | c.1011    | 1.155729755 | 0     | 1 |
| 2079 DAO     | ENST00000228476 | p.R2H    | c.5       | 0.279807708 | 6.489 | 1 |
| 2079 DAO     | ENST00000228476 | p.E173K  | c.517     | 1.130921228 | 9.454 | 2 |
| 2079 DAO     | ENST00000228476 | p.Q28K   | c.82      | 0.05692227  | 5.985 | 1 |
| 2079 DAO     | ENST00000228476 | p.N302H  | c.904     | 0.255304373 | 2.989 | 1 |
| 2080 AGT     | ENST00000366667 | p.F336I  | c.1006    | 0.101634611 | 3.46  | 1 |
| 2080 AGT     | ENST00000366667 | p.E433A  | c.1298    | 0.129182587 | 3.078 | 1 |
| 2080 AGT     | ENST00000366667 | p.K287N  | c.861     | 0.209294541 | 0     | 1 |
| 2081 CDFN    | ENST00000465530 | p.E64K   | c.190     | 0.086090628 | 3.538 | 1 |
| 2081 CDFN    | ENST00000465530 | p.A87T   | c.259     | 0.086090628 | 0     | 1 |
| 2082 IDO1    | ENST00000522495 | p.P122S  | c.364     | 0.089770895 | 3.589 | 1 |
| 2082 IDO1    | ENST00000522495 | p.G236V  | c.707     | 0.113309433 | 3.639 | 1 |
| 2082 IDO1    | ENST00000522495 | p.F259I  | c.775     | 0.165486835 | 0     | 1 |
| 2082 IDO1    | ENST00000522495 | p.G262D  | c.785     | 0.028485896 | 8.884 | 1 |
| 2083 SUPV3L1 | ENST00000359655 | p.G509D  | c.1526    | 0.010474317 | 0     | 1 |
| 2083 SUPV3L1 | ENST00000359655 | p.M295I  | c.885     | 0.010474317 | 6.577 | 1 |
| 2084 IL10RB  | ENST00000290200 | p.V120I  | c.358     | 0.006057759 | 7.367 | 1 |
| 2084 IL10RB  | ENST00000290200 | p.R130C  | c.388     | 0.002271719 | 8.782 | 1 |
| 2084 IL10RB  | ENST00000290200 | p.P219S  | c.654_655 | 0.008329478 | 0     | 1 |
| 2085 NADK    | ENST00000378625 | p.F356I  | c.1066    | 0.074365122 | 0     | 1 |
| 2085 NADK    | ENST00000378625 | p.R382Q  | c.1145    | 0.073367026 | 3.887 | 1 |
| 2085 NADK    | ENST00000378625 | p.G328R  | c.982     | 0.02160642  | 7.206 | 1 |
| 2086 TLR8    | ENST00000311912 | p.T700A  | c.2098    | 0.027129382 | 6.204 | 1 |
| 2086 TLR8    | ENST00000311912 | p.D727N  | c.2179    | 1.025900533 | 0     | 1 |
| 2086 TLR8    | ENST00000311912 | p.D727Y  | c.2179    | 1.025900533 | 0     | 1 |
| 2086 TLR8    | ENST00000311912 | p.S751Y  | c.2252    | 0.054297527 | 6.341 | 1 |
| 2087 SCN3B   | ENST00000299333 | p.M41I   | c.123     | 0.016561762 | 6.916 | 1 |
| 2087 SCN3B   | ENST00000299333 | p.R139W  | c.415     | 1.008280881 | 0     | 1 |
| 2087 SCN3B   | ENST00000299333 | p.R139Q  | c.416     | 1.008280881 | 0     | 1 |
| 2088 LRBA    | ENST00000357115 | p.P2077S | c.6229    | 0.026241609 | 7.252 | 1 |
| 2088 LRBA    | ENST00000357115 | p.E2103K | c.6307    | 3.006560402 | 0     | 4 |
| 2089 FCGR3B  | ENST00000531221 | p.A62V   | c.185     | 0.097981636 | 7.416 | 1 |
| 2089 FCGR3B  | ENST00000531221 | p.V63M   | c.187     | 1.075444318 | 0     | 1 |
| 2089 FCGR3B  | ENST00000531221 | p.V63A   | c.188     | 1.075444318 | 0     | 1 |
| 2089 FCGR3B  | ENST00000531221 | p.C125R  | c.373     | 0.248598999 | 3.845 | 1 |
| 2090 MS4A1   | ENST00000345732 | p.S123I  | c.368     | 0.00882615  | 6.824 | 1 |
| 2090 MS4A1   | ENST00000345732 | p.S173F  | c.518     | 0.00882615  | 0     | 1 |
| 2091 MAPK8   | ENST00000374189 | p.L57Q   | c.170     | 0.100342174 | 0     | 1 |

|      |         |                 |          |           |             |       |   |
|------|---------|-----------------|----------|-----------|-------------|-------|---|
| 2091 | MAPK8   | ENST00000374189 | p.D103Y  | c.307     | 0.100342174 | 3.317 | 1 |
| 2092 | FARSA   | ENST00000588025 | p.L438M  | c.1312    | 0.016589112 | 0     | 1 |
| 2092 | FARSA   | ENST00000588025 | p.R534H  | c.1601    | 0.011202775 | 6.48  | 1 |
| 2092 | FARSA   | ENST00000588025 | p.R271L  | c.812     | 0.002270145 | 8.783 | 1 |
| 2092 | FARSA   | ENST00000588025 | p.Q276H  | c.828     | 0.003116192 | 8.326 | 1 |
| 2093 | SPOP    | ENST00000503676 | p.D188A  | c.563     | 0.113833729 | 3.135 | 1 |
| 2093 | SPOP    | ENST00000503676 | p.K262N  | c.786     | 0.113833729 | 0     | 1 |
| 2094 | ACTB    | ENST00000331789 | p.V339A  | c.1016    | 0.013293591 | 8.409 | 1 |
| 2094 | ACTB    | ENST00000331789 | p.A108V  | c.324_323 | 0.106395733 | 0     | 1 |
| 2094 | ACTB    | ENST00000331789 | p.V139A  | c.416     | 0.014527323 | 8.628 | 1 |
| 2094 | ACTB    | ENST00000331789 | p.G158R  | c.472     | 0.083298393 | 3.613 | 1 |
| 2094 | ACTB    | ENST00000331789 | p.T160A  | c.478     | 0.022413683 | 5.703 | 1 |
| 2095 | UPP2    | ENST00000605860 | p.A144D  | c.431     | 0.009175484 | 6.768 | 1 |
| 2095 | UPP2    | ENST00000605860 | p.Q232E  | c.694     | 0.009175484 | 0     | 1 |
| 2096 | C6      | ENST00000263413 | p.N855D  | c.2563    | 0.043706753 | 4.516 | 1 |
| 2096 | C6      | ENST00000263413 | p.N893K  | c.2679    | 0.061893105 | 0     | 1 |
| 2096 | C6      | ENST00000263413 | p.G930E  | c.2789    | 0.018186352 | 5.781 | 1 |
| 2097 | DCK     | ENST00000504952 | p.F126L  | c.378     | 0.179617522 | 0     | 1 |
| 2097 | DCK     | ENST00000504952 | p.I26M   | c.78      | 0.179617522 | 2.477 | 1 |
| 2098 | PHF6    | ENST00000394292 | p.G214V  | c.641     | 0.040695131 | 4.619 | 1 |
| 2098 | PHF6    | ENST00000394292 | p.C243Y  | c.728     | 0.009284243 | 6.751 | 1 |
| 2098 | PHF6    | ENST00000394292 | p.G288V  | c.863     | 0.049979374 | 0     | 1 |
| 2099 | DECR2   | ENST00000219481 | p.F42L   | c.126     | 0.079083828 | 3.685 | 1 |
| 2099 | DECR2   | ENST00000219481 | p.R43Q   | c.128     | 0.018478911 | 5.866 | 1 |
| 2099 | DECR2   | ENST00000219481 | p.L72R   | c.215     | 0.09489654  | 0     | 1 |
| 2100 | GUCY1B3 | ENST00000502959 | p.V450M  | c.1348    | 0.117434928 | 3.133 | 1 |
| 2100 | GUCY1B3 | ENST00000502959 | p.I543M  | c.1629    | 0.033649722 | 5.049 | 1 |
| 2100 | GUCY1B3 | ENST00000502959 | p.G582R  | c.1744    | 0.144198086 | 0     | 1 |
| 2101 | GMDS    | ENST00000380815 | p.G36A   | c.107     | 0.018736561 | 6.738 | 1 |
| 2101 | GMDS    | ENST00000380815 | p.E41Q   | c.121     | 0.035182456 | 5.829 | 1 |
| 2101 | GMDS    | ENST00000380815 | p.R64Q   | c.191     | 1.026959508 | 0     | 2 |
| 2103 | IFNW1   | ENST00000380229 | p.C122S  | c.364     | 0.052145157 | 0     | 1 |
| 2103 | IFNW1   | ENST00000380229 | p.G23V   | c.68      | 0.021196943 | 5.56  | 1 |
| 2103 | IFNW1   | ENST00000380229 | p.D25G   | c.74      | 0.030948215 | 5.014 | 1 |
| 2104 | DOCK2   | ENST00000256935 | p.D1341H | c.4021    | 0.503851556 | 3.599 | 1 |
| 2104 | DOCK2   | ENST00000256935 | p.R1364S | c.4090    | 3.115694581 | 0     | 1 |
| 2104 | DOCK2   | ENST00000256935 | p.R1364H | c.4091    | 3.115694581 | 0     | 2 |
| 2104 | DOCK2   | ENST00000256935 | p.R1364L | c.4091    | 3.115694581 | 0     | 1 |
| 2104 | DOCK2   | ENST00000256935 | p.G1365R | c.4093    | 0.229019272 | 6.137 | 1 |
| 2104 | DOCK2   | ENST00000256935 | p.G1477R | c.4429    | 0.077399187 | 5.721 | 1 |
| 2105 | RHEB    | ENST00000262187 | p.L58R   | c.173     | 0.063460381 | 3.978 | 1 |
| 2105 | RHEB    | ENST00000262187 | p.T23M   | c.68      | 0.063460381 | 0     | 1 |
| 2106 | VPS36   | ENST00000378060 | p.T239A  | c.715     | 0.008076803 | 6.952 | 1 |
| 2106 | VPS36   | ENST00000378060 | p.A290V  | c.869     | 0.008076803 | 0     | 1 |
| 2107 | LINGO1  | ENST00000355300 | p.R130C  | c.388     | 0.004021641 | 7.958 | 1 |
| 2107 | LINGO1  | ENST00000355300 | p.D176N  | c.526     | 0.004021641 | 0     | 1 |
| 2108 | RGS7    | ENST00000407727 | p.A337P  | c.1009    | 0.036229798 | 5.902 | 1 |
| 2108 | RGS7    | ENST00000407727 | p.E358K  | c.1072    | 0.020970839 | 8.577 | 1 |
| 2108 | RGS7    | ENST00000407727 | p.L360V  | c.1078    | 1.190092552 | 0     | 2 |

|      |        |                 |                    |           |             |       |   |
|------|--------|-----------------|--------------------|-----------|-------------|-------|---|
| 2108 | RGS7   | ENST00000407727 | p.F362L            | c.1086    | 0.125770498 | 7.855 | 1 |
| 2108 | RGS7   | ENST00000407727 | p.M430I            | c.1290    | 0.379095968 | 2.587 | 1 |
| 2109 | ASH2L  | ENST00000343823 | p.S134L            | c.401     | 1.063026266 | 0     | 2 |
| 2109 | ASH2L  | ENST00000343823 | p.R160Q            | c.479     | 0.147990371 | 6.206 | 1 |
| 2109 | ASH2L  | ENST00000343823 | p.C207Y            | c.620     | 0.197031381 | 4.337 | 1 |
| 2110 | LIPF   | ENST00000394375 | p.G350D            | c.1049    | 0.049549009 | 4.335 | 1 |
| 2110 | LIPF   | ENST00000394375 | p.E376K            | c.1126    | 0.049549009 | 0     | 1 |
| 2111 | NUP214 | ENST00000451030 | p.A187T            | c.559     | 0.094702905 | 0     | 1 |
| 2111 | NUP214 | ENST00000451030 | p.L220F            | c.658     | 0.013242562 | 6.353 | 1 |
| 2111 | NUP214 | ENST00000451030 | p.P221S            | c.661     | 0.083478145 | 3.6   | 1 |
| 2112 | DIRAS2 | ENST00000375765 | p.R73W             | c.217     | 0.098413497 | 0     | 1 |
| 2112 | DIRAS2 | ENST00000375765 | p.E106K            | c.316     | 0.098413497 | 3.345 | 1 |
| 2113 | GSTM4  | ENST00000369836 | p.R145K            | c.434     | 0.00964502  | 0     | 1 |
| 2113 | GSTM4  | ENST00000369836 | p.P179Q            | c.536     | 0.00964502  | 6.696 | 1 |
| 2114 | AHCYL2 | ENST00000325006 | p.P566H            | c.1697    | 1.009712107 | 0     | 1 |
| 2114 | AHCYL2 | ENST00000325006 | p.P566L            | c.1697    | 1.009712107 | 0     | 1 |
| 2114 | AHCYL2 | ENST00000325006 | p.P603L            | c.1808    | 0.019424214 | 6.686 | 1 |
| 2115 | NPM1   | ENST00000517671 | p.P216S            | c.646     | 0.004903406 | 0     | 1 |
| 2115 | NPM1   | ENST00000517671 | p.K257E            | c.769     | 0.004903406 | 7.672 | 1 |
| 2116 | FOXP2  | ENST00000408937 | p.Y534D            | c.1600    | 0.27269526  | 0     | 1 |
| 2116 | FOXP2  | ENST00000408937 | p.T562A            | c.1684    | 0.085291357 | 9.441 | 1 |
| 2116 | FOXP2  | ENST00000408937 | p.F566L            | c.1698    | 0.082494796 | 4.015 | 1 |
| 2116 | FOXP2  | ENST00000408937 | p.N569I            | c.1706    | 0.131216725 | 3.154 | 1 |
| 2116 | FOXP2  | ENST00000408937 | p.N580S            | c.1739    | 0.113966018 | 3.365 | 1 |
| 2117 | NF1    | ENST00000358273 | p.A928V            | c.2783    | 0.016153605 | 5.952 | 1 |
| 2117 | NF1    | ENST00000358273 | p.P931L            | c.2792    | 0.017145812 | 5.866 | 1 |
| 2117 | NF1    | ENST00000358273 | p.K1040N           | c.3120    | 0.033299417 | 0     | 1 |
| 2118 | ITGA4  | ENST00000397033 | p.S132F            | c.395     | 0.006857983 | 7.188 | 1 |
| 2118 | ITGA4  | ENST00000397033 | p.V142E            | c.425     | 0.010258759 | 6.607 | 1 |
| 2118 | ITGA4  | ENST00000397033 | p.L210S            | c.629     | 0.027094974 | 0     | 1 |
| 2118 | ITGA4  | ENST00000397033 | p.E267K            | c.799     | 0.009978232 | 6.647 | 1 |
| 2119 | ADAM17 | ENST00000310823 | p.D342Y            | c.1024    | 0.133424035 | 0     | 1 |
| 2119 | ADAM17 | ENST00000310823 | p.K388N            | c.1164    | 0.104423452 | 3.533 | 1 |
| 2119 | ADAM17 | ENST00000310823 | p.R234H            | c.701     | 0.039781763 | 5.809 | 1 |
| 2119 | ADAM17 | ENST00000310823 | p.K309R            | c.926     | 0.066094816 | 5.098 | 1 |
| 2120 | CNDP1  | ENST00000358821 | p.L501F            | c.1503    | 0.009459633 | 6.724 | 1 |
| 2120 | CNDP1  | ENST00000358821 | p.D121N            | c.361     | 0.027622735 | 5.178 | 1 |
| 2120 | CNDP1  | ENST00000358821 | p.T123M            | c.368     | 0.005384395 | 7.537 | 1 |
| 2120 | CNDP1  | ENST00000358821 | p.D186N            | c.556     | 0.042466764 | 0     | 1 |
| 2121 | ACAP1  | ENST00000158762 | p.S432I            | c.1295    | 0.069257481 | 0     | 1 |
| 2121 | ACAP1  | ENST00000158762 | p.F454L            | c.1360    | 0.038432411 | 4.747 | 1 |
| 2121 | ACAP1  | ENST00000158762 | p.R458Q            | c.1373    | 0.048910728 | 4.965 | 1 |
| 2122 | PHYH   | ENST00000263038 | p.L338V            | c.1012    | 0.0625      | 5     | 1 |
| 2122 | PHYH   | ENST00000263038 | p.R184in_frame_del | c.552_550 | 0.056445407 | 5.147 | 1 |
| 2122 | PHYH   | ENST00000263038 | p.D286N            | c.856     | 1.059472703 | 0     | 2 |
| 2123 | CTNNB1 | ENST00000361383 | p.D375H            | c.1123    | 0.093104841 | 3.425 | 1 |
| 2123 | CTNNB1 | ENST00000361383 | p.R425Q            | c.1274    | 0.093104841 | 0     | 1 |
| 2124 | GDA    | ENST00000238018 | p.F73L             | c.219     | 0.035624165 | 0     | 1 |
| 2124 | GDA    | ENST00000238018 | p.F17L             | c.49      | 0.035624165 | 4.811 | 1 |



|                |                 |                    |           |             |       |   |
|----------------|-----------------|--------------------|-----------|-------------|-------|---|
| 2126 DUSP4     | ENST00000240100 | p.A282V            | c.845     | 0.001258569 | 9.634 | 1 |
| 2126 DUSP4     | ENST00000240100 | p.S315R            | c.945     | 0.001258569 | 0     | 1 |
| 2127 FTMT      | ENST00000321339 | p.L86I             | c.256     | 0.059922014 | 0     | 1 |
| 2127 FTMT      | ENST00000321339 | p.E122K            | c.364     | 0.0186588   | 5.744 | 1 |
| 2127 FTMT      | ENST00000321339 | p.N169K            | c.507     | 0.041263214 | 4.599 | 1 |
| 2128 THEM4     | ENST00000368814 | p.E131D            | c.393     | 0.030206441 | 5.049 | 1 |
| 2128 THEM4     | ENST00000368814 | p.L200F            | c.598     | 0.030206441 | 0     | 1 |
| 2129 LIPF      | ENST00000394375 | p.S401Y            | c.1202    | 0.005609158 | 7.478 | 1 |
| 2129 LIPF      | ENST00000394375 | p.I403M            | c.1209    | 0.058236019 | 7.947 | 1 |
| 2129 LIPF      | ENST00000394375 | p.Y76C             | c.227     | 0.006977858 | 7.163 | 1 |
| 2129 LIPF      | ENST00000394375 | p.G77E             | c.230     | 0.016097718 | 5.957 | 1 |
| 2129 LIPF      | ENST00000394375 | p.N80K             | c.240     | 0.03739528  | 4.741 | 1 |
| 2129 LIPF      | ENST00000394375 | p.R87I             | c.260     | 0.024603374 | 5.345 | 1 |
| 2129 LIPF      | ENST00000394375 | p.A119V            | c.356     | 0.09473581  | 0     | 1 |
| 2130 HSDL2     | ENST00000398805 | p.G128C            | c.382     | 0.006306258 | 7.309 | 1 |
| 2130 HSDL2     | ENST00000398805 | p.Y178C            | c.533     | 0.006306258 | 0     | 1 |
| 2131 FGFR4     | ENST00000502906 | p.S342F            | c.1025    | 0.002727888 | 8.518 | 1 |
| 2131 FGFR4     | ENST00000502906 | p.G254R            | c.760     | 0.002727888 | 0     | 1 |
| 2132 TRAPPC4   | ENST00000533058 | p.Y7H              | c.19      | 0.160873656 | 2.636 | 1 |
| 2132 TRAPPC4   | ENST00000533058 | p.V156L            | c.466     | 0.160873656 | 0     | 1 |
| 2133 SUV420H1  | ENST00000304363 | p.S193C            | c.577     | 0.070170089 | 3.833 | 1 |
| 2133 SUV420H1  | ENST00000304363 | p.G194A            | c.581     | 0.02750516  | 6.259 | 1 |
| 2133 SUV420H1  | ENST00000304363 | p.L226V            | c.676     | 0.083227385 | 0     | 1 |
| 2134 CRYM      | ENST00000219599 | p.V226L            | c.676     | 0.083736475 | 3.578 | 1 |
| 2134 CRYM      | ENST00000219599 | p.S292F            | c.875     | 0.083736475 | 0     | 1 |
| 2135 MSH6      | ENST00000234420 | p.K99N             | c.297     | 0.007823338 | 0     | 1 |
| 2135 MSH6      | ENST00000234420 | p.R128H            | c.383     | 0.007823338 | 6.998 | 1 |
| 2137 VPS33A    | ENST00000267199 | p.E368K            | c.1102    | 0.28710066  | 3.419 | 1 |
| 2137 VPS33A    | ENST00000267199 | p.D369V            | c.1106    | 0.034751925 | 6.476 | 1 |
| 2137 VPS33A    | ENST00000267199 | p.T375P            | c.1123    | 0.11275292  | 4.778 | 1 |
| 2137 VPS33A    | ENST00000267199 | p.R70C             | c.208     | 2.164322654 | 0     | 3 |
| 2137 VPS33A    | ENST00000267199 | p.E95K             | c.283     | 0.101355926 | 5.433 | 1 |
| 2138 DARS      | ENST00000264161 | p.M34I             | c.102     | 0.028610112 | 5.272 | 1 |
| 2138 DARS      | ENST00000264161 | p.T403I            | c.1208    | 0.108206754 | 3.245 | 1 |
| 2138 DARS      | ENST00000264161 | p.I432M            | c.1296    | 0.131357308 | 0     | 1 |
| 2139 ERBB2     | ENST00000269571 | p.D821Y            | c.2461    | 0.016042024 | 6.962 | 1 |
| 2139 ERBB2     | ENST00000269571 | p.M916I            | c.2748    | 1.008021012 | 0     | 2 |
| 2140 SERPINA10 | ENST00000261994 | p.G356E            | c.1067    | 0.021642335 | 5.53  | 1 |
| 2140 SERPINA10 | ENST00000261994 | p.I124in_frame_del | c.373_371 | 0.021642335 | 0     | 1 |
| 2141 FGFR4     | ENST00000502906 | p.V350M            | c.1048    | 0.003860491 | 8.017 | 1 |
| 2141 FGFR4     | ENST00000502906 | p.E326K            | c.976     | 0.003860491 | 0     | 1 |
| 2142 BUB1B     | ENST00000412359 | p.P104S            | c.310     | 0.016447362 | 5.926 | 1 |
| 2142 BUB1B     | ENST00000412359 | p.R144C            | c.430     | 0.016447362 | 0     | 1 |
| 2143 MGLL      | ENST00000265052 | p.G62E             | c.185     | 0.016053147 | 5.961 | 1 |
| 2143 MGLL      | ENST00000265052 | p.G91E             | c.272     | 0.025499676 | 0     | 1 |
| 2143 MGLL      | ENST00000265052 | p.T20S             | c.58      | 0.009446529 | 6.726 | 1 |
| 2144 HIST1H1B  | ENST00000331442 | p.K49N             | c.147     | 0.034987903 | 0     | 1 |
| 2144 HIST1H1B  | ENST00000331442 | p.G94D             | c.281     | 0.034987903 | 4.837 | 1 |
| 2145 USP11     | ENST00000218348 | p.E140Q            | c.418     | 0.006429846 | 0     | 1 |

|              |                 |          |        |             |       |   |
|--------------|-----------------|----------|--------|-------------|-------|---|
| 2145 USP11   | ENST00000218348 | p.P177S  | c.529  | 0.006429846 | 7.281 | 1 |
| 2146 CUL7    | ENST00000535468 | p.P463L  | c.1388 | 0.189333289 | 2.401 | 1 |
| 2146 CUL7    | ENST00000535468 | p.R485W  | c.1453 | 0.189333289 | 0     | 1 |
| 2147 RASL12  | ENST00000220062 | p.R103H  | c.308  | 0.009512235 | 6.716 | 1 |
| 2147 RASL12  | ENST00000220062 | p.R28C   | c.82   | 0.009512235 | 0     | 1 |
| 2148 HSPA5   | ENST00000324460 | p.L288V  | c.862  | 0.061256213 | 4.029 | 1 |
| 2148 HSPA5   | ENST00000324460 | p.F312S  | c.935  | 0.061256213 | 0     | 1 |
| 2149 HTRA1   | ENST00000368984 | p.K248T  | c.743  | 0.01869764  | 5.741 | 1 |
| 2149 HTRA1   | ENST00000368984 | p.M314I  | c.942  | 0.01869764  | 0     | 1 |
| 2150 NOS3    | ENST00000297494 | p.E167D  | c.501  | 0.05509251  | 4.182 | 1 |
| 2150 NOS3    | ENST00000297494 | p.D197N  | c.589  | 0.05509251  | 0     | 1 |
| 2151 IL5RA   | ENST00000256452 | p.D162Y  | c.484  | 0.012510672 | 9.976 | 1 |
| 2151 IL5RA   | ENST00000256452 | p.E165D  | c.495  | 0.099077415 | 0     | 1 |
| 2151 IL5RA   | ENST00000256452 | p.G191E  | c.572  | 0.012898107 | 6.396 | 1 |
| 2151 IL5RA   | ENST00000256452 | p.R192I  | c.575  | 0.09875148  | 3.536 | 1 |
| 2152 HTRA1   | ENST00000368984 | p.G350V  | c.1049 | 0.03829559  | 4.749 | 1 |
| 2152 HTRA1   | ENST00000368984 | p.G276R  | c.826  | 0.030877036 | 5.07  | 1 |
| 2152 HTRA1   | ENST00000368984 | p.S298I  | c.893  | 0.066958428 | 0     | 1 |
| 2153 DPYS    | ENST00000351513 | p.K165R  | c.494  | 0.108818477 | 0     | 1 |
| 2153 DPYS    | ENST00000351513 | p.D197N  | c.589  | 0.060859851 | 4.11  | 1 |
| 2153 DPYS    | ENST00000351513 | p.A200S  | c.598  | 0.05385482  | 4.296 | 1 |
| 2154 ENPEP   | ENST00000265162 | p.W771L  | c.2312 | 0.022189177 | 5.494 | 1 |
| 2154 ENPEP   | ENST00000265162 | p.S799L  | c.2396 | 0.022189177 | 0     | 1 |
| 2155 THBS2   | ENST00000366787 | p.R1036H | c.3107 | 0.0336092   | 4.895 | 1 |
| 2155 THBS2   | ENST00000366787 | p.N1069D | c.3205 | 0.060291003 | 0     | 1 |
| 2155 THBS2   | ENST00000366787 | p.R1093Q | c.3278 | 0.026681804 | 5.228 | 1 |
| 2156 ANK1    | ENST00000396942 | p.G970D  | c.2909 | 0.204273729 | 7.166 | 1 |
| 2156 ANK1    | ENST00000396942 | p.S973I  | c.2918 | 0.259224067 | 0     | 1 |
| 2156 ANK1    | ENST00000396942 | p.V1064L | c.3190 | 0.108563002 | 3.536 | 1 |
| 2156 ANK1    | ENST00000396942 | p.I1065V | c.3193 | 0.2100853   | 2.816 | 1 |
| 2156 ANK1    | ENST00000396942 | p.M1066R | c.3197 | 0.158751979 | 5.378 | 1 |
| 2157 PPP2R1A | ENST00000322088 | p.L466M  | c.1396 | 0.010416396 | 6.585 | 1 |
| 2157 PPP2R1A | ENST00000322088 | p.I505T  | c.1514 | 0.010416396 | 0     | 1 |
| 2158 GBP1    | ENST00000370473 | p.S428L  | c.1283 | 0.012815202 | 6.286 | 1 |
| 2158 GBP1    | ENST00000370473 | p.D479N  | c.1435 | 0.012815202 | 0     | 1 |
| 2159 PRKCG   | ENST00000540413 | p.D193N  | c.577  | 1.044187559 | 0     | 2 |
| 2159 PRKCG   | ENST00000540413 | p.P194S  | c.580  | 0.089571819 | 8.209 | 1 |
| 2159 PRKCG   | ENST00000540413 | p.T218R  | c.653  | 0.164429175 | 4.615 | 1 |
| 2160 NPR3    | ENST00000265074 | p.W393C  | c.1179 | 0.033353917 | 4.906 | 1 |
| 2160 NPR3    | ENST00000265074 | p.Y171H  | c.511  | 0.033353917 | 0     | 1 |
| 2162 SRC     | ENST00000445403 | p.A91V   | c.272  | 0.029400816 | 5.088 | 1 |
| 2162 SRC     | ENST00000445403 | p.A141T  | c.421  | 0.029400816 | 0     | 1 |
| 2163 PDE4B   | ENST00000341517 | p.L350I  | c.1048 | 0.032805602 | 6.736 | 1 |
| 2163 PDE4B   | ENST00000341517 | p.S417L  | c.1250 | 1.009381277 | 0     | 2 |
| 2164 QSOX1   | ENST00000367602 | p.L436F  | c.1306 | 0.024210647 | 0     | 1 |
| 2164 QSOX1   | ENST00000367602 | p.S463C  | c.1388 | 0.007099829 | 7.138 | 1 |
| 2164 QSOX1   | ENST00000367602 | p.S469I  | c.1406 | 0.010365978 | 6.592 | 1 |
| 2164 QSOX1   | ENST00000367602 | p.L475F  | c.1423 | 0.019114932 | 7.212 | 1 |
| 2165 HK3     | ENST00000292432 | p.D721N  | c.2161 | 1.003001709 | 0     | 2 |

|               |                 |         |           |             |       |   |
|---------------|-----------------|---------|-----------|-------------|-------|---|
| 2165 HK3      | ENST00000292432 | p.F747L | c.2239    | 0.159941601 | 8.38  | 1 |
| 2166 GPC1     | ENST00000420138 | p.D476H | c.1426    | 0.012157581 | 6.362 | 1 |
| 2166 GPC1     | ENST00000420138 | p.R480Q | c.1439    | 0.008138621 | 6.941 | 1 |
| 2167 PNLIPRP1 | ENST00000358834 | p.H166Y | c.496     | 0.207543975 | 0     | 1 |
| 2167 PNLIPRP1 | ENST00000358834 | p.L187M | c.559     | 0.041914267 | 4.772 | 1 |
| 2167 PNLIPRP1 | ENST00000358834 | p.T191K | c.572     | 0.162492744 | 2.784 | 1 |
| 2167 PNLIPRP1 | ENST00000358834 | p.H327Y | c.979     | 0.037745269 | 5.279 | 1 |
| 2168 AGTR1    | ENST00000404754 | p.L262M | c.784     | 0.020948634 | 5.577 | 1 |
| 2168 AGTR1    | ENST00000404754 | p.A283T | c.847     | 0.020948634 | 0     | 1 |
| 2169 PTPRE    | ENST00000419012 | p.L153Q | c.458     | 0.010911551 | 6.518 | 1 |
| 2169 PTPRE    | ENST00000419012 | p.C186S | c.555_556 | 0.010911551 | 0     | 1 |
| 2171 PDCD6    | ENST00000264933 | p.L52V  | c.154     | 0.008060025 | 6.955 | 1 |
| 2171 PDCD6    | ENST00000264933 | p.D149N | c.445     | 0.008060025 | 0     | 1 |
| 2172 PIK3CA   | ENST00000263967 | p.E737K | c.2209    | 0.016322434 | 5.937 | 1 |
| 2172 PIK3CA   | ENST00000263967 | p.L766F | c.2296    | 0.016322434 | 0     | 1 |
| 2173 PGLYRP1  | ENST00000008938 | p.G94R  | c.280     | 0.143686856 | 2.799 | 1 |
| 2173 PGLYRP1  | ENST00000008938 | p.A116T | c.346     | 0.143686856 | 0     | 1 |
| 2174 HDAC3    | ENST00000305264 | p.E347D | c.1041    | 0.021038849 | 0     | 1 |
| 2174 HDAC3    | ENST00000305264 | p.P98S  | c.292     | 0.020082186 | 6.547 | 1 |
| 2174 HDAC3    | ENST00000305264 | p.G99R  | c.295     | 0.016224315 | 6.595 | 1 |
| 2175 CDK6     | ENST00000265734 | p.L218I | c.652     | 0.079868564 | 3.783 | 1 |
| 2175 CDK6     | ENST00000265734 | p.V234M | c.700     | 0.106665992 | 3.33  | 1 |
| 2175 CDK6     | ENST00000265734 | p.F265I | c.793     | 0.172086692 | 0     | 1 |
| 2176 OCRL     | ENST00000371113 | p.L863F | c.2587    | 0.020151066 | 5.633 | 1 |
| 2176 OCRL     | ENST00000371113 | p.R884H | c.2651    | 0.020151066 | 0     | 1 |
| 2177 MGLL     | ENST00000265052 | p.V105I | c.313     | 0.014268723 | 0     | 1 |
| 2177 MGLL     | ENST00000265052 | p.R229Q | c.686     | 0.014268723 | 6.131 | 1 |
| 2178 TBK1     | ENST00000331710 | p.F112L | c.336     | 0.028143965 | 0     | 1 |
| 2178 TBK1     | ENST00000331710 | p.M263V | c.787     | 0.011187256 | 6.482 | 1 |
| 2178 TBK1     | ENST00000331710 | p.L281I | c.841     | 0.016956709 | 5.882 | 1 |
| 2179 BIN1     | ENST00000316724 | p.L541H | c.1622    | 1.01277972  | 0     | 1 |
| 2179 BIN1     | ENST00000316724 | p.L541R | c.1622    | 1.01277972  | 0     | 1 |
| 2179 BIN1     | ENST00000316724 | p.G582V | c.1745    | 0.047412816 | 6.29  | 1 |
| 2180 MASP2    | ENST00000400897 | p.M403I | c.1209    | 0.032940357 | 0     | 1 |
| 2180 MASP2    | ENST00000400897 | p.C430S | c.1288    | 0.032940357 | 4.924 | 1 |
| 2181 CAB39L   | ENST00000409308 | p.F280S | c.839     | 0.004518313 | 7.79  | 1 |
| 2181 CAB39L   | ENST00000409308 | p.L332V | c.994     | 0.004518313 | 0     | 1 |
| 2182 PLAU     | ENST00000372764 | p.Y71F  | c.212     | 0.141612521 | 2.962 | 1 |
| 2182 PLAU     | ENST00000372764 | p.G75D  | c.224     | 0.11672593  | 3.273 | 1 |
| 2182 PLAU     | ENST00000372764 | p.R130Q | c.389     | 0.231785795 | 0     | 1 |
| 2183 PIK3CG   | ENST00000496166 | p.I703L | c.2107    | 0.015082297 | 6.051 | 1 |
| 2183 PIK3CG   | ENST00000496166 | p.R707S | c.2121    | 0.012691444 | 6.3   | 1 |
| 2183 PIK3CG   | ENST00000496166 | p.R839C | c.2515    | 0.027773741 | 0     | 1 |
| 2184 ALOX15   | ENST00000545513 | p.S480F | c.1439    | 0.039852168 | 5.312 | 1 |
| 2184 ALOX15   | ENST00000545513 | p.Y482H | c.1444    | 0.011913438 | 6.517 | 1 |
| 2184 ALOX15   | ENST00000545513 | p.A486V | c.1457    | 0.017249922 | 5.983 | 1 |
| 2184 ALOX15   | ENST00000545513 | p.A563T | c.1687    | 0.095788764 | 3.457 | 1 |
| 2184 ALOX15   | ENST00000545513 | p.Y672C | c.2015    | 0.142964402 | 0     | 1 |
| 2185 ILSRA    | ENST00000256452 | p.Q56E  | c.166     | 0.080120353 | 3.69  | 1 |

|              |                 |          |           |             |       |   |
|--------------|-----------------|----------|-----------|-------------|-------|---|
| 2185 IL5RA   | ENST00000256452 | p.R99W   | c.295     | 0.043554165 | 6.763 | 1 |
| 2185 IL5RA   | ENST00000256452 | p.L30I   | c.88      | 0.08668907  | 0     | 1 |
| 2186 C7      | ENST00000313164 | p.R792L  | c.2375    | 0.222056699 | 0     | 1 |
| 2186 C7      | ENST00000313164 | p.A822V  | c.2465    | 0.222056699 | 2.171 | 1 |
| 2187 ANGPT2  | ENST00000325203 | p.F346C  | c.1037    | 0.006929659 | 0     | 1 |
| 2187 ANGPT2  | ENST00000325203 | p.G443R  | c.1327    | 0.006929659 | 7.173 | 1 |
| 2188 KARS    | ENST00000319410 | p.G167V  | c.501_500 | 0.063226998 | 7.192 | 1 |
| 2188 KARS    | ENST00000319410 | p.F197C  | c.590     | 1.018696958 | 0     | 2 |
| 2188 KARS    | ENST00000319410 | p.P228S  | c.682     | 0.023715926 | 6.398 | 1 |
| 2189 AKR1C3  | ENST00000380554 | p.R171S  | c.513     | 0.143142415 | 0     | 1 |
| 2189 AKR1C3  | ENST00000380554 | p.P315S  | c.943     | 0.061621825 | 4.14  | 1 |
| 2189 AKR1C3  | ENST00000380554 | p.S320L  | c.959     | 0.066706931 | 4.019 | 1 |
| 2189 AKR1C3  | ENST00000380554 | p.E322K  | c.964     | 0.03871802  | 5.337 | 1 |
| 2190 BPI     | ENST00000262865 | p.P461T  | c.1381    | 0.104748392 | 0     | 1 |
| 2190 BPI     | ENST00000262865 | p.D483N  | c.1447    | 0.104748392 | 3.255 | 1 |
| 2191 ABCB10  | ENST00000344517 | p.A394T  | c.1180    | 0.12612568  | 3.157 | 1 |
| 2191 ABCB10  | ENST00000344517 | p.F398L  | c.1194    | 0.123551252 | 3.19  | 1 |
| 2191 ABCB10  | ENST00000344517 | p.F399C  | c.1196    | 0.01885217  | 6.018 | 1 |
| 2191 ABCB10  | ENST00000344517 | p.Y332H  | c.994     | 0.237117999 | 0     | 1 |
| 2192 GUCY1A3 | ENST00000296518 | p.V488I  | c.1462    | 0.599659322 | 2.258 | 1 |
| 2192 GUCY1A3 | ENST00000296518 | p.A550V  | c.1649    | 0.250349418 | 9.41  | 1 |
| 2192 GUCY1A3 | ENST00000296518 | p.D561H  | c.1681    | 0.296774217 | 6.456 | 1 |
| 2192 GUCY1A3 | ENST00000296518 | p.S565Y  | c.1694    | 0.013888002 | 8.932 | 1 |
| 2192 GUCY1A3 | ENST00000296518 | p.R574Q  | c.1721    | 1.422646958 | 0     | 2 |
| 2192 GUCY1A3 | ENST00000296518 | p.R614Q  | c.1841    | 1.384889814 | 3.533 | 2 |
| 2192 GUCY1A3 | ENST00000296518 | p.I616N  | c.1847    | 0.129266015 | 5.271 | 1 |
| 2193 UAP1    | ENST00000367925 | p.T81S   | c.241     | 0.014248956 | 6.133 | 1 |
| 2193 UAP1    | ENST00000367925 | p.D318E  | c.954     | 0.014248956 | 0     | 1 |
| 2194 NR4A1   | ENST00000545748 | p.E499D  | c.1497    | 0.388383088 | 2.955 | 1 |
| 2194 NR4A1   | ENST00000545748 | p.R504H  | c.1511    | 0.03644042  | 6.424 | 1 |
| 2194 NR4A1   | ENST00000545748 | p.L616M  | c.1846    | 2.140606572 | 0     | 3 |
| 2195 F10     | ENST00000375559 | p.A339V  | c.1016    | 0.044518022 | 8.01  | 1 |
| 2195 F10     | ENST00000375559 | p.P422L  | c.1265    | 0.186146307 | 0     | 1 |
| 2195 F10     | ENST00000375559 | p.D132N  | c.394     | 0.144382721 | 3.389 | 1 |
| 2195 F10     | ENST00000375559 | p.G263E  | c.788     | 0.095096319 | 3.526 | 1 |
| 2196 TENC1   | ENST00000314276 | p.G1170V | c.3509    | 0.271495464 | 1.881 | 1 |
| 2196 TENC1   | ENST00000314276 | p.R1254H | c.3761    | 0.271495464 | 0     | 1 |
| 2197 SULT2A1 | ENST00000222002 | p.S68F   | c.203     | 0.012610208 | 9.903 | 1 |
| 2197 SULT2A1 | ENST00000222002 | p.W7C    | c.21      | 0.019918371 | 5.866 | 1 |
| 2197 SULT2A1 | ENST00000222002 | p.K141N  | c.423     | 0.197340596 | 0     | 1 |
| 2197 SULT2A1 | ENST00000222002 | p.T15I   | c.44      | 0.020266538 | 5.841 | 1 |
| 2197 SULT2A1 | ENST00000222002 | p.V239E  | c.716     | 0.111445456 | 3.469 | 1 |
| 2197 SULT2A1 | ENST00000222002 | p.D3G    | c.8       | 0.080314043 | 3.808 | 1 |
| 2198 GBE1    | ENST00000429644 | p.R336K  | c.1007    | 0.017313005 | 5.852 | 1 |
| 2198 GBE1    | ENST00000429644 | p.K68T   | c.203     | 0.017313005 | 0     | 1 |
| 2199 CLEC4D  | ENST00000299665 | p.W154V  | c.460_461 | 0.165305336 | 2.792 | 1 |
| 2199 CLEC4D  | ENST00000299665 | p.E173K  | c.517     | 0.165806607 | 2.787 | 1 |
| 2199 CLEC4D  | ENST00000299665 | p.D196N  | c.586     | 0.289272717 | 0     | 1 |
| 2200 RBM12   | ENST00000359646 | p.Q861L  | c.2582    | 0.120643786 | 0     | 1 |

|              |                 |          |        |             |       |   |
|--------------|-----------------|----------|--------|-------------|-------|---|
| 2200 RBM12   | ENST00000359646 | p.G898S  | c.2692 | 0.092812598 | 3.473 | 1 |
| 2200 RBM12   | ENST00000359646 | p.A900V  | c.2699 | 0.0410987   | 5.031 | 1 |
| 2201 F10     | ENST00000375559 | p.F269L  | c.807  | 0.284993318 | 0     | 1 |
| 2201 F10     | ENST00000375559 | p.R327Q  | c.980  | 0.284993318 | 1.811 | 1 |
| 2202 PIAS3   | ENST00000393045 | p.I142M  | c.426  | 0.240653113 | 0     | 1 |
| 2202 PIAS3   | ENST00000393045 | p.R143W  | c.427  | 0.091814943 | 7.488 | 1 |
| 2202 PIAS3   | ENST00000393045 | p.S273C  | c.818  | 0.175876249 | 3.318 | 1 |
| 2202 PIAS3   | ENST00000393045 | p.V274M  | c.820  | 0.185295411 | 2.891 | 1 |
| 2203 SEPSECS | ENST00000382103 | p.C41F   | c.122  | 0.005715122 | 7.451 | 1 |
| 2203 SEPSECS | ENST00000382103 | p.A129T  | c.385  | 0.006606033 | 7.242 | 1 |
| 2203 SEPSECS | ENST00000382103 | p.F286V  | c.856  | 0.012321155 | 0     | 1 |
| 2204 MTOR    | ENST00000361445 | p.A1428V | c.4283 | 0.078454499 | 3.672 | 1 |
| 2204 MTOR    | ENST00000361445 | p.E2388Q | c.7162 | 0.078454499 | 0     | 1 |
| 2205 PGR     | ENST00000325455 | p.D746Y  | c.2236 | 0.366783336 | 2.447 | 1 |
| 2205 PGR     | ENST00000325455 | p.R836Q  | c.2507 | 1.183391668 | 0     | 2 |
| 2206 CPS1    | ENST00000430249 | p.V1383E | c.4148 | 0.066800374 | 3.904 | 1 |
| 2206 CPS1    | ENST00000430249 | p.A1480S | c.4438 | 0.066800374 | 0     | 1 |
| 2207 RYR3    | ENST00000389232 | p.V2618I | c.7852 | 0.074739748 | 0     | 1 |
| 2207 RYR3    | ENST00000389232 | p.W2670R | c.8008 | 0.026998408 | 5.28  | 1 |
| 2207 RYR3    | ENST00000389232 | p.A2672V | c.8015 | 0.050263717 | 4.351 | 1 |
| 2208 DOCK2   | ENST00000256935 | p.E1496V | c.4487 | 0.003825861 | 0     | 1 |
| 2208 DOCK2   | ENST00000256935 | p.L1566M | c.4696 | 0.003825861 | 8.03  | 1 |
| 2209 CRMP1   | ENST00000324989 | p.R475Q  | c.1424 | 0.170922359 | 7.496 | 1 |
| 2209 CRMP1   | ENST00000324989 | p.A496T  | c.1486 | 2.00553961  | 0     | 3 |
| 2210 ITGAM   | ENST00000544665 | p.G512R  | c.1534 | 0.049240868 | 4.344 | 1 |
| 2210 ITGAM   | ENST00000544665 | p.Q516K  | c.1546 | 0.013659041 | 6.194 | 1 |
| 2210 ITGAM   | ENST00000544665 | p.R571Q  | c.1712 | 0.062899909 | 0     | 1 |
| 2211 DLG1    | ENST00000357674 | p.R429S  | c.1287 | 0.075154328 | 3.734 | 1 |
| 2211 DLG1    | ENST00000357674 | p.P514L  | c.1541 | 0.075154328 | 0     | 1 |
| 2212 ADORA2A | ENST00000337539 | p.A105V  | c.314  | 0.009143739 | 0     | 1 |
| 2212 ADORA2A | ENST00000337539 | p.R222W  | c.664  | 0.009143739 | 6.773 | 1 |
| 2213 SAT2    | ENST00000269298 | p.F51L   | c.153  | 0.191974688 | 2.863 | 1 |
| 2213 SAT2    | ENST00000269298 | p.R87H   | c.260  | 0.270682861 | 0     | 1 |
| 2213 SAT2    | ENST00000269298 | p.C122G  | c.364  | 0.187753511 | 2.908 | 1 |
| 2214 CUL1    | ENST00000602748 | p.A554V  | c.1661 | 0.01179239  | 6.406 | 1 |
| 2214 CUL1    | ENST00000602748 | p.T580M  | c.1739 | 0.01179239  | 0     | 1 |
| 2215 HBB     | ENST00000335295 | p.V68L   | c.202  | 0.077428044 | 3.691 | 1 |
| 2215 HBB     | ENST00000335295 | p.G25S   | c.73   | 0.077428044 | 0     | 1 |
| 2216 ROR2    | ENST00000375708 | p.E467K  | c.1399 | 0.109803809 | 0     | 1 |
| 2216 ROR2    | ENST00000375708 | p.K545N  | c.1635 | 0.109803809 | 3.187 | 1 |
| 2217 WAPAL   | ENST00000298767 | p.Y725C  | c.2174 | 0.205102476 | 0     | 1 |
| 2217 WAPAL   | ENST00000298767 | p.I772T  | c.2315 | 0.046836009 | 5.068 | 1 |
| 2217 WAPAL   | ENST00000298767 | p.N781D  | c.2341 | 0.012774344 | 6.489 | 1 |
| 2217 WAPAL   | ENST00000298767 | p.M796L  | c.2386 | 0.196187049 | 6.139 | 1 |
| 2217 WAPAL   | ENST00000298767 | p.E797D  | c.2391 | 0.169084029 | 2.762 | 1 |
| 2217 WAPAL   | ENST00000298767 | p.R853I  | c.2558 | 0.195415012 | 8.616 | 1 |
| 2218 CR1     | ENST00000367052 | p.L49F   | c.145  | 0.024523343 | 9.279 | 1 |
| 2218 CR1     | ENST00000367052 | p.A52S   | c.154  | 0.130808116 | 0     | 1 |
| 2218 CR1     | ENST00000367052 | p.C73R   | c.217  | 0.120738745 | 3.29  | 1 |

|      |          |                 |         |           |             |       |   |
|------|----------|-----------------|---------|-----------|-------------|-------|---|
| 2218 | CR1      | ENST00000367052 | p.P81E  | c.241_242 | 0.036886127 | 5.213 | 1 |
| 2219 | ACVR2A   | ENST00000241416 | p.R400C | c.1198    | 0.122257934 | 0     | 1 |
| 2219 | ACVR2A   | ENST00000241416 | p.N282I | c.845     | 0.122257934 | 3.032 | 1 |
| 2220 | GLB1     | ENST00000445488 | p.N603D | c.1807    | 0.015788304 | 5.985 | 1 |
| 2220 | GLB1     | ENST00000445488 | p.Y154C | c.461     | 0.015788304 | 0     | 1 |
| 2221 | CFI      | ENST00000394635 | p.D358Y | c.1072    | 0.004763652 | 0     | 1 |
| 2221 | CFI      | ENST00000394635 | p.P536L | c.1607    | 0.001372479 | 9.509 | 1 |
| 2221 | CFI      | ENST00000394635 | p.M540I | c.1620    | 0.003391173 | 8.204 | 1 |
| 2222 | CYP2A6   | ENST00000301141 | p.Q422R | c.1265    | 0.011343424 | 6.462 | 1 |
| 2222 | CYP2A6   | ENST00000301141 | p.I331T | c.992     | 0.011343424 | 0     | 1 |
| 2223 | CDK8     | ENST00000381527 | p.P339L | c.1016    | 0.08478777  | 3.56  | 1 |
| 2223 | CDK8     | ENST00000381527 | p.R125L | c.374     | 0.08478777  | 0     | 1 |
| 2224 | S100A9   | ENST00000368738 | p.G35E  | c.104     | 0.004175023 | 0     | 1 |
| 2224 | S100A9   | ENST00000368738 | p.E60K  | c.178     | 0.004175023 | 7.904 | 1 |
| 2225 | IL1A     | ENST00000263339 | p.A195V | c.584     | 0.260797148 | 0     | 1 |
| 2225 | IL1A     | ENST00000263339 | p.N220S | c.659     | 0.260797148 | 1.939 | 1 |
| 2226 | CD38     | ENST00000226279 | p.W50L  | c.149     | 0.175720353 | 0     | 1 |
| 2226 | CD38     | ENST00000226279 | p.K121N | c.363     | 0.146616093 | 2.818 | 1 |
| 2226 | CD38     | ENST00000226279 | p.D175G | c.524     | 0.038722576 | 4.882 | 1 |
| 2227 | SULT1B1  | ENST00000310613 | p.M60I  | c.180     | 0.141073416 | 5.34  | 1 |
| 2227 | SULT1B1  | ENST00000310613 | p.I220L | c.658     | 1.02695265  | 0     | 1 |
| 2227 | SULT1B1  | ENST00000310613 | p.I220S | c.659     | 1.02695265  | 0     | 1 |
| 2227 | SULT1B1  | ENST00000310613 | p.H227Y | c.679     | 0.096223553 | 8.787 | 1 |
| 2228 | 6-Sep    | ENST00000489216 | p.T98M  | c.293     | 0.024964122 | 5.324 | 1 |
| 2228 | 6-Sep    | ENST00000489216 | p.H144Q | c.432     | 0.029844748 | 0     | 1 |
| 2228 | 6-Sep    | ENST00000489216 | p.T290I | c.869     | 0.003747125 | 8.06  | 1 |
| 2228 | 6-Sep    | ENST00000489216 | p.Y298D | c.892     | 0.0011335   | 9.785 | 1 |
| 2229 | DHX9     | ENST00000367549 | p.H173R | c.518     | 0.156786711 | 0     | 1 |
| 2229 | DHX9     | ENST00000367549 | p.L244M | c.730     | 0.024382629 | 6.481 | 1 |
| 2229 | DHX9     | ENST00000367549 | p.H252Y | c.754     | 0.147221599 | 2.78  | 1 |
| 2231 | RPS5     | ENST00000598495 | p.A67S  | c.199     | 0.017591228 | 5.829 | 1 |
| 2231 | RPS5     | ENST00000598495 | p.E119K | c.355     | 0.003791541 | 8.043 | 1 |
| 2231 | RPS5     | ENST00000598495 | p.F20L  | c.58      | 0.021382769 | 0     | 1 |
| 2232 | CYP46A1  | ENST00000261835 | p.R372H | c.1115    | 0.112390381 | 3.361 | 1 |
| 2232 | CYP46A1  | ENST00000261835 | p.R435H | c.1304    | 0.25208603  | 0     | 1 |
| 2232 | CYP46A1  | ENST00000261835 | p.W134C | c.402     | 0.133253179 | 3.09  | 1 |
| 2232 | CYP46A1  | ENST00000261835 | p.R138Q | c.413     | 0.045332242 | 4.744 | 1 |
| 2233 | STK17B   | ENST00000263955 | p.R74Q  | c.221     | 0.160141356 | 0     | 1 |
| 2233 | STK17B   | ENST00000263955 | p.I106M | c.318     | 0.077783077 | 3.807 | 1 |
| 2233 | STK17B   | ENST00000263955 | p.Q20E  | c.58      | 0.095032141 | 3.495 | 1 |
| 2234 | CUL5     | ENST00000531427 | p.E71Q  | c.211     | 0.016288528 | 0     | 1 |
| 2234 | CUL5     | ENST00000531427 | p.V227L | c.679     | 0.016288528 | 5.94  | 1 |
| 2235 | PPIA     | ENST00000468812 | p.R37C  | c.109     | 0.023324662 | 0     | 1 |
| 2235 | PPIA     | ENST00000468812 | p.S147F | c.440     | 0.023324662 | 5.422 | 1 |
| 2236 | SARS     | ENST00000369923 | p.P384L | c.1151    | 0.041292679 | 0     | 1 |
| 2236 | SARS     | ENST00000369923 | p.Q467H | c.1401    | 0.031217853 | 5.151 | 1 |
| 2236 | SARS     | ENST00000369923 | p.D161Y | c.481     | 0.013148117 | 6.249 | 1 |
| 2237 | SERPINB2 | ENST00000457692 | p.L395I | c.1183    | 0.086935164 | 3.658 | 1 |
| 2237 | SERPINB2 | ENST00000457692 | p.F409I | c.1225    | 0.167524621 | 3.36  | 1 |

|      |          |                 |          |           |             |       |   |
|------|----------|-----------------|----------|-----------|-------------|-------|---|
| 2237 | SERPINB2 | ENST00000457692 | p.L13I   | c.37      | 0.068492207 | 7.362 | 1 |
| 2237 | SERPINB2 | ENST00000457692 | p.F16L   | c.48      | 0.182693896 | 0     | 1 |
| 2238 | VASP     | ENST00000245932 | p.R35H   | c.104     | 0.010806177 | 6.532 | 1 |
| 2238 | VASP     | ENST00000245932 | p.Q37K   | c.109     | 0.011948721 | 6.387 | 1 |
| 2238 | VASP     | ENST00000245932 | p.L91F   | c.271     | 0.022754898 | 0     | 1 |
| 2239 | FH       | ENST00000366560 | p.R343Q  | c.1028    | 0.055969893 | 0     | 1 |
| 2239 | FH       | ENST00000366560 | p.Q376H  | c.1128    | 0.016460493 | 7.245 | 1 |
| 2239 | FH       | ENST00000366560 | p.H235R  | c.704     | 0.049377582 | 4.34  | 1 |
| 2240 | RABGEF1  | ENST00000437078 | p.E79K   | c.235     | 0.168917568 | 3.623 | 1 |
| 2240 | KCTD7    | ENST00000380828 | p.E105K  | c.313     | 0.168917568 | 3.623 | 1 |
| 2240 | RABGEF1  | ENST00000437078 | p.F163S  | c.488     | 0.168917568 | 7.246 | 1 |
| 2240 | KCTD7    | ENST00000380828 | p.F189S  | c.566     | 0.168917568 | 0     | 1 |
| 2241 | SPTB     | ENST00000556626 | p.K1696T | c.5087    | 0.083678454 | 3.579 | 1 |
| 2241 | SPTB     | ENST00000556626 | p.W1771G | c.5311    | 0.083678454 | 0     | 1 |
| 2242 | TOB1     | ENST00000499247 | p.P46S   | c.136     | 0.007370611 | 7.084 | 1 |
| 2242 | TOB1     | ENST00000499247 | p.D95N   | c.283     | 0.007370611 | 0     | 1 |
| 2243 | KRIT1    | ENST00000412043 | p.L497Q  | c.1490    | 0.017457612 | 0     | 1 |
| 2243 | KRIT1    | ENST00000412043 | p.P657S  | c.1969    | 0.017457612 | 5.84  | 1 |
| 2244 | HSD11B1  | ENST00000367027 | p.S125C  | c.374     | 0.059294325 | 4.129 | 1 |
| 2244 | HSD11B1  | ENST00000367027 | p.A226E  | c.677     | 0.094601225 | 0     | 1 |
| 2244 | HSD11B1  | ENST00000367027 | p.L267P  | c.800     | 0.053630463 | 4.739 | 1 |
| 2245 | MS4A1    | ENST00000345732 | p.K50N   | c.150     | 0.214984877 | 0     | 1 |
| 2245 | MS4A1    | ENST00000345732 | p.G75E   | c.224_225 | 0.032960603 | 5.347 | 1 |
| 2245 | MS4A1    | ENST00000345732 | p.M23L   | c.67      | 0.181326596 | 2.568 | 1 |
| 2245 | MS4A1    | ENST00000345732 | p.S25C   | c.74      | 0.025450325 | 5.521 | 1 |
| 2246 | KAL1     | ENST00000262648 | p.K449N  | c.1347    | 0.001226702 | 0     | 1 |
| 2246 | KAL1     | ENST00000262648 | p.Y486D  | c.1456    | 0.001226702 | 9.671 | 1 |
| 2247 | USP4     | ENST00000265560 | p.E338K  | c.1012    | 0.142200653 | 0     | 1 |
| 2247 | USP4     | ENST00000265560 | p.R411W  | c.1231    | 0.142200653 | 2.814 | 1 |
| 2248 | RGS2     | ENST00000235382 | p.F105L  | c.315     | 1.004527719 | 0     | 2 |
| 2248 | RGS2     | ENST00000235382 | p.R188H  | c.563     | 0.01308545  | 7.787 | 1 |
| 2249 | DCX      | ENST00000338081 | p.S58I   | c.173     | 0.195307638 | 6.099 | 1 |
| 2249 | DCX      | ENST00000338081 | p.D90Y   | c.268     | 1.541865575 | 0     | 1 |
| 2249 | DCX      | ENST00000338081 | p.E91K   | c.271     | 0.077041584 | 9.957 | 1 |
| 2249 | DCX      | ENST00000338081 | p.R140H  | c.419     | 0.585721004 | 2.157 | 1 |
| 2249 | DCX      | ENST00000338081 | p.D143N  | c.427     | 0.250472782 | 3.409 | 1 |
| 2249 | DCX      | ENST00000338081 | p.R144H  | c.431     | 0.487498465 | 2.266 | 1 |
| 2249 | DCX      | ENST00000338081 | p.S171Y  | c.512     | 1.541865575 | 0     | 1 |
| 2250 | ACOT2    | ENST00000238651 | p.A65V   | c.194     | 0.028795756 | 6.118 | 1 |
| 2250 | ACOT2    | ENST00000238651 | p.Q184R  | c.551     | 1.014397878 | 0     | 2 |
| 2251 | MTHFD2   | ENST00000394053 | p.V39F   | c.115     | 0.107277563 | 3.702 | 1 |
| 2251 | MTHFD2   | ENST00000394053 | p.P177L  | c.530     | 0.10104237  | 4.036 | 1 |
| 2251 | MTHFD2   | ENST00000394053 | p.P309T  | c.925     | 0.137799646 | 0     | 1 |
| 2252 | NRP2     | ENST00000360409 | p.W216C  | c.648     | 0.008127346 | 0     | 1 |
| 2252 | NRP2     | ENST00000360409 | p.F249C  | c.746     | 0.008127346 | 6.943 | 1 |
| 2253 | CD4      | ENST00000011653 | p.R79H   | c.236     | 0.097193254 | 3.363 | 1 |
| 2253 | CD4      | ENST00000011653 | p.E102K  | c.304     | 0.097193254 | 0     | 1 |
| 2254 | CD1B     | ENST00000368168 | p.C224Y  | c.671     | 0.031144337 | 0     | 1 |
| 2254 | CD1B     | ENST00000368168 | p.S278Y  | c.833     | 0.01159784  | 6.43  | 1 |

|      |        |                 |          |           |             |       |   |
|------|--------|-----------------|----------|-----------|-------------|-------|---|
| 2254 | CD1B   | ENST00000368168 | p.I291N  | c.872     | 0.010294375 | 6.602 | 1 |
| 2254 | CD1B   | ENST00000368168 | p.W295L  | c.884     | 0.009252122 | 6.756 | 1 |
| 2255 | MGAM   | ENST00000475668 | p.D2540N | c.7618    | 0.102592701 | 4.285 | 1 |
| 2255 | MGAM   | ENST00000475668 | p.V2542M | c.7624    | 0.036448418 | 5.778 | 1 |
| 2255 | MGAM   | ENST00000475668 | p.G2591R | c.7771    | 1.069520559 | 0     | 1 |
| 2255 | MGAM   | ENST00000475668 | p.G2591E | c.7772    | 1.069520559 | 0     | 1 |
| 2256 | PDE1A  | ENST00000456212 | p.H335P  | c.1004    | 0.021988715 | 5.597 | 1 |
| 2256 | PDE1A  | ENST00000456212 | p.R343I  | c.1028    | 0.065630156 | 3.959 | 1 |
| 2256 | PDE1A  | ENST00000456212 | p.P427S  | c.1279    | 0.084961897 | 0     | 1 |
| 2257 | HBD    | ENST00000380299 | p.V61M   | c.181     | 0.022097087 | 5.5   | 1 |
| 2257 | HBD    | ENST00000380299 | p.A28P   | c.82      | 0.022097087 | 0     | 1 |
| 2258 | CBLB   | ENST00000264122 | p.C345S  | c.1034    | 0.027565355 | 0     | 1 |
| 2258 | CBLB   | ENST00000264122 | p.Q318E  | c.952     | 0.027565355 | 5.181 | 1 |
| 2259 | GMDS   | ENST00000380815 | p.S117F  | c.350     | 1.00585141  | 0     | 2 |
| 2259 | GMDS   | ENST00000380815 | p.R325Q  | c.974     | 0.019150465 | 7.417 | 1 |
| 2260 | PDGFRB | ENST00000261799 | p.V125M  | c.373     | 0.008881383 | 6.815 | 1 |
| 2260 | PDGFRB | ENST00000261799 | p.L128I  | c.382_381 | 0.012115519 | 6.367 | 1 |
| 2260 | PDGFRB | ENST00000261799 | p.D153H  | c.457     | 0.020996901 | 0     | 1 |
| 2261 | PRKCG  | ENST00000540413 | p.S260F  | c.779     | 0.12869251  | 2.958 | 1 |
| 2261 | PRKCG  | ENST00000540413 | p.Y286F  | c.857     | 0.12869251  | 0     | 1 |
| 2262 | GABBR2 | ENST00000259455 | p.T202M  | c.605     | 0.161451701 | 0     | 1 |
| 2262 | GABBR2 | ENST00000259455 | p.E230K  | c.688     | 0.138720384 | 2.947 | 1 |
| 2262 | GABBR2 | ENST00000259455 | p.L252R  | c.755     | 0.040817101 | 4.976 | 1 |
| 2263 | FAP    | ENST00000188790 | p.P472L  | c.1415    | 0.006721505 | 0     | 1 |
| 2263 | FAP    | ENST00000188790 | p.S53Y   | c.158     | 0.006721505 | 7.217 | 1 |
| 2264 | SET    | ENST00000372692 | p.Q41P   | c.122     | 0.001972171 | 0     | 1 |
| 2264 | SET    | ENST00000372692 | p.E65D   | c.195     | 0.001972171 | 8.986 | 1 |
| 2265 | HEXA   | ENST00000566304 | p.P223S  | c.667     | 0.019572235 | 6.939 | 1 |
| 2265 | HEXA   | ENST00000566304 | p.T228S  | c.683     | 0.072249209 | 3.946 | 1 |
| 2265 | HEXA   | ENST00000566304 | p.W277G  | c.829     | 0.13230638  | 3.139 | 1 |
| 2265 | HEXA   | ENST00000566304 | p.F315L  | c.945     | 0.186552168 | 0     | 1 |
| 2266 | CAPN2  | ENST00000295006 | p.L541F  | c.1623    | 0.040921419 | 0     | 1 |
| 2266 | CAPN2  | ENST00000295006 | p.F597L  | c.1791    | 0.040921419 | 4.611 | 1 |
| 2267 | RRM2   | ENST00000360566 | p.R358W  | c.1072    | 0.019370433 | 5.69  | 1 |
| 2267 | RRM2   | ENST00000360566 | p.I384V  | c.1150    | 0.044433971 | 0     | 1 |
| 2267 | RRM2   | ENST00000360566 | p.P406S  | c.1216    | 0.03032658  | 6.104 | 1 |
| 2267 | RRM2   | ENST00000360566 | p.G293N  | c.877_878 | 0.010525262 | 6.57  | 1 |
| 2268 | THEM4  | ENST00000368814 | p.D70N   | c.208     | 0.118339204 | 3.079 | 1 |
| 2268 | THEM4  | ENST00000368814 | p.E103K  | c.307     | 0.118339204 | 0     | 1 |
| 2269 | CSF3R  | ENST00000440588 | p.Q197H  | c.591     | 0.109803809 | 3.187 | 1 |
| 2269 | CSF3R  | ENST00000440588 | p.P221S  | c.661     | 0.109803809 | 0     | 1 |
| 2270 | ITGA2B | ENST00000262407 | p.R431M  | c.1292    | 0.368096267 | 0     | 1 |
| 2270 | ITGA2B | ENST00000262407 | p.S432L  | c.1295    | 0.102357823 | 5.883 | 1 |
| 2270 | ITGA2B | ENST00000262407 | p.H622Y  | c.1864    | 0.137467577 | 3.195 | 1 |
| 2270 | ITGA2B | ENST00000262407 | p.G721D  | c.2162    | 0.316430956 | 2.302 | 1 |
| 2270 | ITGA2B | ENST00000262407 | p.S756N  | c.2267    | 0.051394008 | 4.674 | 1 |
| 2272 | DUSP8  | ENST00000397374 | p.R210W  | c.628     | 0.009030365 | 0     | 1 |
| 2272 | DUSP8  | ENST00000397374 | p.F231S  | c.692     | 0.009030365 | 6.791 | 1 |
| 2273 | SV2C   | ENST00000502798 | p.R475K  | c.1424    | 0.091318142 | 0     | 1 |



|             |                 |          |        |             |       |   |
|-------------|-----------------|----------|--------|-------------|-------|---|
| 2273 SV2C   | ENST00000502798 | p.D498G  | c.1493 | 0.008906041 | 6.811 | 1 |
| 2273 SV2C   | ENST00000502798 | p.V516L  | c.1546 | 0.086569797 | 3.601 | 1 |
| 2275 TALDO1 | ENST00000319006 | p.R192H  | c.575  | 0.079384436 | 3.655 | 1 |
| 2275 TALDO1 | ENST00000319006 | p.R239H  | c.716  | 0.079384436 | 0     | 1 |
| 2276 CUL5   | ENST00000531427 | p.L407Q  | c.1220 | 0.008513688 | 0     | 1 |
| 2276 CUL5   | ENST00000531427 | p.V437A  | c.1310 | 0.008513688 | 6.876 | 1 |
| 2277 NEK1   | ENST00000507142 | p.L125I  | c.373  | 0.058233777 | 4.102 | 1 |
| 2277 NEK1   | ENST00000507142 | p.G148E  | c.443  | 0.058233777 | 0     | 1 |
| 2278 FTO    | ENST00000471389 | p.E375K  | c.1123 | 0.21292542  | 0     | 1 |
| 2278 FTO    | ENST00000471389 | p.W407L  | c.1220 | 0.164097032 | 2.789 | 1 |
| 2278 FTO    | ENST00000471389 | p.M410I  | c.1230 | 0.049245583 | 9.537 | 1 |
| 2278 FTO    | ENST00000471389 | p.R445C  | c.1333 | 0.106426949 | 3.902 | 1 |
| 2279 PAPSS2 | ENST00000456849 | p.L50I   | c.148  | 0.009650914 | 0     | 1 |
| 2279 PAPSS2 | ENST00000456849 | p.E156G  | c.467  | 0.007329853 | 7.092 | 1 |
| 2279 PAPSS2 | ENST00000456849 | p.L163I  | c.487  | 0.002321061 | 8.751 | 1 |
| 2280 TTC5   | ENST00000258821 | p.V417L  | c.1249 | 0.085200163 | 3.553 | 1 |
| 2280 TTC5   | ENST00000258821 | p.H300Y  | c.898  | 0.085200163 | 0     | 1 |
| 2281 POLRMT | ENST00000588649 | p.D1128E | c.3384 | 0.028835703 | 5.116 | 1 |
| 2281 POLRMT | ENST00000588649 | p.D1151N | c.3451 | 0.028835703 | 0     | 1 |
| 2282 GPX8   | ENST00000503787 | p.N85K   | c.255  | 0.010194961 | 6.616 | 1 |
| 2282 GPX8   | ENST00000503787 | p.Y86C   | c.257  | 0.081277509 | 3.621 | 1 |
| 2282 GPX8   | ENST00000503787 | p.Y130D  | c.388  | 0.09147247  | 0     | 1 |
| 2283 GCKR   | ENST00000264717 | p.L364F  | c.1090 | 0.015425265 | 6.153 | 1 |
| 2283 GCKR   | ENST00000264717 | p.M371I  | c.1113 | 0.099038464 | 3.356 | 1 |
| 2283 GCKR   | ENST00000264717 | p.F115L  | c.345  | 0.111718771 | 0     | 1 |
| 2285 RHOA   | ENST00000418115 | p.Y42C   | c.125  | 4.018853811 | 0     | 3 |
| 2285 RHOA   | ENST00000418115 | p.Y42S   | c.125  | 4.018853811 | 0     | 2 |
| 2285 RHOA   | ENST00000418115 | p.R5W    | c.13   | 1.056196244 | 6.729 | 1 |
| 2285 RHOA   | ENST00000418115 | p.R5Q    | c.14   | 1.056196244 | 6.729 | 1 |
| 2286 TLR2   | ENST00000260010 | p.D691Y  | c.2071 | 0.212003821 | 0     | 1 |
| 2286 TLR2   | ENST00000260010 | p.E694D  | c.2082 | 0.089904137 | 7.514 | 1 |
| 2286 TLR2   | ENST00000260010 | p.H721D  | c.2161 | 0.163074824 | 3.4   | 1 |
| 2286 TLR2   | ENST00000260010 | p.R723H  | c.2168 | 0.149073544 | 3.161 | 1 |
| 2287 PLCB2  | ENST00000260402 | p.P447S  | c.1339 | 0.017836792 | 5.809 | 1 |
| 2287 PLCB2  | ENST00000260402 | p.S450R  | c.1350 | 0.00797113  | 6.971 | 1 |
| 2287 PLCB2  | ENST00000260402 | p.N319I  | c.956  | 0.025807922 | 0     | 1 |
| 2288 EHMT1  | ENST00000460843 | p.R951H  | c.2852 | 0.068015153 | 0     | 1 |
| 2288 EHMT1  | ENST00000460843 | p.E1032D | c.3096 | 0.068015153 | 3.878 | 1 |
| 2289 IL12B  | ENST00000231228 | p.Y38H   | c.112  | 0.201018609 | 8.764 | 1 |
| 2289 IL12B  | ENST00000231228 | p.G43R   | c.127  | 1.014011174 | 0     | 1 |
| 2289 IL12B  | ENST00000231228 | p.G43A   | c.128  | 1.014011174 | 0     | 1 |
| 2289 IL12B  | ENST00000231228 | p.E81Q   | c.241  | 0.219839998 | 6.416 | 1 |
| 2290 FUT8   | ENST00000360689 | p.P571A  | c.1711 | 1.013303964 | 0     | 1 |
| 2290 FUT8   | ENST00000360689 | p.P571L  | c.1712 | 1.013303964 | 0     | 1 |
| 2290 FUT8   | ENST00000360689 | p.Y197H  | c.589  | 0.026607928 | 6.232 | 1 |
| 2291 APAF1  | ENST00000551964 | p.N485K  | c.1455 | 0.053178983 | 0     | 1 |
| 2291 APAF1  | ENST00000551964 | p.K513N  | c.1539 | 0.053178983 | 4.233 | 1 |
| 2292 MYH7   | ENST00000355349 | p.N479D  | c.1435 | 0.009105791 | 0     | 1 |
| 2292 MYH7   | ENST00000355349 | p.I521M  | c.1563 | 0.009105791 | 6.779 | 1 |

|             |                 |          |         |             |       |   |
|-------------|-----------------|----------|---------|-------------|-------|---|
| 2294 CSF2RA | ENST00000417535 | p.T230M  | c.689   | 0.003925249 | 7.993 | 1 |
| 2294 CSF2RA | ENST00000417535 | p.T231M  | c.692   | 0.003052062 | 8.356 | 1 |
| 2294 CSF2RA | ENST00000417535 | p.A290S  | c.868   | 0.006977311 | 0     | 1 |
| 2295 C5     | ENST00000223642 | p.R766Q  | c.2297  | 0.188523769 | 2.42  | 1 |
| 2295 C5     | ENST00000223642 | p.D822Y  | c.2464  | 0.010592193 | 6.808 | 1 |
| 2295 C5     | ENST00000223642 | p.E921G  | c.2762  | 0.195780736 | 0     | 1 |
| 2296 NAGK   | ENST00000455662 | p.I95N   | c.284   | 0.001349836 | 0     | 1 |
| 2296 NAGK   | ENST00000455662 | p.A129V  | c.386   | 0.001349836 | 9.533 | 1 |
| 2297 PC     | ENST00000393958 | p.M616I  | c.1848  | 0.07411327  | 4.148 | 1 |
| 2297 PC     | ENST00000393958 | p.P623S  | c.1867  | 0.046204104 | 4.515 | 1 |
| 2297 PC     | ENST00000393958 | p.S1009L | c.3026  | 0.100143354 | 0     | 1 |
| 2298 MSH6   | ENST00000234420 | p.S950I  | c.2849  | 0.008332701 | 0     | 1 |
| 2298 MSH6   | ENST00000234420 | p.R976H  | c.2927  | 0.008332701 | 6.907 | 1 |
| 2299 HAO1   | ENST00000378789 | p.E334K  | c.1000  | 0.017039183 | 5.875 | 1 |
| 2299 HAO1   | ENST00000378789 | p.S72I   | c.215   | 0.011280697 | 6.47  | 1 |
| 2299 HAO1   | ENST00000378789 | p.S100F  | c.299   | 0.02831988  | 0     | 1 |
| 2300 WAPAL  | ENST00000298767 | p.R816Q  | c.2447  | 0.149477475 | 0     | 1 |
| 2300 WAPAL  | ENST00000298767 | p.E867K  | c.2599  | 0.149477475 | 2.742 | 1 |
| 2301 SETD2  | ENST00000409792 | p.M1627R | c.4880  | 0.380307784 | 5.609 | 1 |
| 2301 SETD2  | ENST00000409792 | p.H1629Y | c.4885  | 2.269144569 | 0     | 3 |
| 2301 SETD2  | ENST00000409792 | p.F1650V | c.4948  | 1.177831968 | 9.268 | 1 |
| 2301 SETD2  | ENST00000409792 | p.F1650S | c.4949  | 1.177831968 | 9.268 | 1 |
| 2301 SETD2  | ENST00000409792 | p.D1665V | c.4994  | 0.348411053 | 3.179 | 1 |
| 2301 SETD2  | ENST00000409792 | p.Y1666H | c.4996  | 0.596684188 | 2.889 | 1 |
| 2302 CLEC4M | ENST00000327325 | p.P392L  | c.1175  | 0.14288894  | 3.787 | 1 |
| 2302 CLEC4M | ENST00000327325 | p.A393T  | c.1177  | 0.137919814 | 2.959 | 1 |
| 2302 CLEC4M | ENST00000327325 | p.R263H  | c.788   | 0.065557363 | 7.819 | 1 |
| 2302 CLEC4M | ENST00000327325 | p.G277R  | c.829   | 0.205475232 | 0     | 1 |
| 2303 ENPEP  | ENST00000265162 | p.E378K  | c.1132  | 0.014957367 | 6.063 | 1 |
| 2303 ENPEP  | ENST00000265162 | p.R386S  | c.1158  | 0.020095273 | 5.637 | 1 |
| 2303 ENPEP  | ENST00000265162 | p.Q814H  | c.2442  | 0.03505264  | 0     | 1 |
| 2304 KYNU   | ENST00000264170 | p.M134I  | c.402   | 0.056932443 | 4.162 | 1 |
| 2304 KYNU   | ENST00000264170 | p.A136S  | c.406   | 0.020240948 | 5.705 | 1 |
| 2304 KYNU   | ENST00000264170 | p.G287D  | c.860   | 0.07503165  | 0     | 1 |
| 2305 MMP9   | ENST00000372330 | p.A225T  | c.673   | 0.093765312 | 3.438 | 1 |
| 2305 MMP9   | ENST00000372330 | p.A228T  | c.682   | 0.017705349 | 5.947 | 1 |
| 2305 MMP9   | ENST00000372330 | p.R267P  | c.800   | 0.108479337 | 0     | 1 |
| 2306 GDA    | ENST00000238018 | p.R163W  | c.487   | 1.02179287  | 0     | 1 |
| 2306 GDA    | ENST00000238018 | p.R163Q  | c.488   | 1.02179287  | 0     | 1 |
| 2306 GDA    | ENST00000238018 | p.S204Y  | c.611   | 0.04358574  | 5.52  | 1 |
| 2307 OXSR1  | ENST00000311806 | p.P244S  | c.730   | 0.007694269 | 7.022 | 1 |
| 2307 OXSR1  | ENST00000311806 | p.I268L  | c.802   | 0.007694269 | 0     | 1 |
| 2308 C5     | ENST00000223642 | p.E869K  | c.2605  | 0.015420571 | 6.019 | 1 |
| 2308 C5     | ENST00000223642 | p.A1530V | c.4589  | 0.015420571 | 0     | 1 |
| 2309 LHCGR  | ENST00000294954 | p.T142M  | c.425   | 0.045373696 | 4.462 | 1 |
| 2309 LHCGR  | ENST00000294954 | p.G166R  | c.496   | 0.045373696 | 0     | 1 |
| 2310 HUWE1  | ENST00000342160 | p.P3981H | c.11942 | 0.095921631 | 0     | 1 |
| 2310 HUWE1  | ENST00000342160 | p.R4237H | c.12710 | 0.095921631 | 3.382 | 1 |
| 2312 FH     | ENST00000366560 | p.V416L  | c.1246  | 0.016721734 | 0     | 1 |

|             |                 |          |        |             |       |   |
|-------------|-----------------|----------|--------|-------------|-------|---|
| 2312 FH     | ENST00000366560 | p.H318R  | c.953  | 0.01404266  | 7.272 | 1 |
| 2312 FH     | ENST00000366560 | p.A320T  | c.958  | 0.01025165  | 6.608 | 1 |
| 2313 NCAM2  | ENST00000400546 | p.D131H  | c.391  | 0.080269738 | 4.639 | 1 |
| 2313 NCAM2  | ENST00000400546 | p.Q172K  | c.514  | 1.040134869 | 0     | 1 |
| 2313 NCAM2  | ENST00000400546 | p.Q172H  | c.516  | 1.040134869 | 0     | 1 |
| 2314 IL5RA  | ENST00000256452 | p.G251E  | c.752  | 0.152344632 | 8.232 | 1 |
| 2314 IL5RA  | ENST00000256452 | p.R253C  | c.757  | 1.026154809 | 0     | 1 |
| 2314 IL5RA  | ENST00000256452 | p.R253H  | c.758  | 1.026154809 | 0     | 1 |
| 2314 IL5RA  | ENST00000256452 | p.D300N  | c.898  | 0.191350287 | 5.453 | 1 |
| 2315 B3GAT1 | ENST00000537389 | p.R117H  | c.350  | 0.024113753 | 0     | 1 |
| 2315 B3GAT1 | ENST00000537389 | p.R326Q  | c.977  | 0.024113753 | 5.374 | 1 |
| 2316 APPL2  | ENST00000551662 | p.M111V  | c.331  | 0.014339623 | 8.874 | 1 |
| 2316 APPL2  | ENST00000551662 | p.M200I  | c.600  | 0.030198011 | 0     | 1 |
| 2316 APPL2  | ENST00000551662 | p.M238I  | c.714  | 0.028066637 | 5.155 | 1 |
| 2317 GHRHR  | ENST00000326139 | p.P66Q   | c.197  | 0.121329309 | 0     | 1 |
| 2317 GHRHR  | ENST00000326139 | p.W101C  | c.303  | 0.121329309 | 3.043 | 1 |
| 2318 CP     | ENST00000264613 | p.F92L   | c.274  | 0.320911512 | 3.364 | 1 |
| 2318 CP     | ENST00000264613 | p.S191L  | c.572  | 0.054126836 | 9.164 | 1 |
| 2318 CP     | ENST00000264613 | p.G195R  | c.583  | 0.013399033 | 9.956 | 1 |
| 2318 CP     | ENST00000264613 | p.N263D  | c.787  | 1.109427847 | 0     | 1 |
| 2318 CP     | ENST00000264613 | p.N263S  | c.788  | 1.109427847 | 0     | 1 |
| 2318 CP     | ENST00000264613 | p.G264E  | c.791  | 0.120233647 | 6.71  | 1 |
| 2319 CDKN2D | ENST00000335766 | p.D104N  | c.310  | 0.005605272 | 0     | 1 |
| 2319 CDKN2D | ENST00000335766 | p.R135S  | c.405  | 0.005605272 | 7.479 | 1 |
| 2320 XDH    | ENST00000379416 | p.P1013S | c.3037 | 1.121210729 | 0     | 1 |
| 2320 XDH    | ENST00000379416 | p.P1013H | c.3038 | 1.121210729 | 0     | 1 |
| 2320 XDH    | ENST00000379416 | p.P1073A | c.3217 | 0.023581552 | 6.917 | 1 |
| 2320 XDH    | ENST00000379416 | p.M1123I | c.3369 | 0.059646282 | 5.127 | 1 |
| 2320 XDH    | ENST00000379416 | p.D1124G | c.3371 | 0.171050744 | 3.568 | 1 |
| 2321 UPP1   | ENST00000341253 | p.G144R  | c.430  | 0.251596357 | 0     | 1 |
| 2321 UPP1   | ENST00000341253 | p.Y227S  | c.680  | 0.012837588 | 9.203 | 1 |
| 2321 UPP1   | ENST00000341253 | p.R245L  | c.734  | 0.11246266  | 3.357 | 1 |
| 2321 UPP1   | ENST00000341253 | p.R275C  | c.823  | 0.178306457 | 2.715 | 1 |
| 2322 MTMR6  | ENST00000381801 | p.Q433R  | c.1298 | 0.096856991 | 3.368 | 1 |
| 2322 MTMR6  | ENST00000381801 | p.Y112C  | c.335  | 0.096856991 | 0     | 1 |
| 2323 UBA2   | ENST00000246548 | p.S207Y  | c.620  | 0.269694514 | 4.225 | 1 |
| 2323 UBA2   | ENST00000246548 | p.R237H  | c.710  | 1.088746083 | 0     | 2 |
| 2323 UBA2   | ENST00000246548 | p.K257N  | c.771  | 0.178573418 | 6.857 | 1 |
| 2323 UBA2   | ENST00000246548 | p.D261Y  | c.781  | 0.054714505 | 5.23  | 1 |
| 2324 RAB21  | ENST00000261263 | p.R38C   | c.112  | 0.151242257 | 0     | 1 |
| 2324 RAB21  | ENST00000261263 | p.K59N   | c.177  | 0.023455527 | 6.108 | 1 |
| 2324 RAB21  | ENST00000261263 | p.Q165P  | c.494  | 0.059278072 | 4.19  | 1 |
| 2324 RAB21  | ENST00000261263 | p.I169T  | c.506  | 0.087634796 | 3.609 | 1 |
| 2325 CLEC4E | ENST00000299663 | p.W101C  | c.303  | 0.097058609 | 3.365 | 1 |
| 2325 CLEC4E | ENST00000299663 | p.E177K  | c.529  | 0.097058609 | 0     | 1 |
| 2326 SLBP   | ENST00000318386 | p.E136Q  | c.406  | 0.005222658 | 7.581 | 1 |
| 2326 SLBP   | ENST00000318386 | p.D159N  | c.475  | 0.005222658 | 0     | 1 |
| 2327 CCNA2  | ENST00000274026 | p.M189L  | c.565  | 0.096856991 | 0     | 1 |
| 2327 CCNA2  | ENST00000274026 | p.P309R  | c.926  | 0.096856991 | 3.368 | 1 |

|      |         |                 |         |           |             |       |   |
|------|---------|-----------------|---------|-----------|-------------|-------|---|
| 2328 | RAP1B   | ENST00000250559 | p.T35M  | c.104     | 0.02086115  | 7.168 | 1 |
| 2328 | RAP1B   | ENST00000250559 | p.S88F  | c.263_264 | 0.030289519 | 6.63  | 1 |
| 2328 | RAP1B   | ENST00000250559 | p.G12E  | c.35      | 2.017050223 | 0     | 3 |
| 2329 | DECR1   | ENST00000220764 | p.R91P  | c.272     | 0.020025749 | 5.642 | 1 |
| 2329 | DECR1   | ENST00000220764 | p.V118M | c.352     | 0.020025749 | 0     | 1 |
| 2330 | LCMT1   | ENST00000399069 | p.P206A | c.616     | 0.005774853 | 7.436 | 1 |
| 2330 | LCMT1   | ENST00000399069 | p.K259T | c.776     | 0.005774853 | 0     | 1 |
| 2331 | F5      | ENST00000367796 | p.H390N | c.1168    | 0.022860488 | 5.451 | 1 |
| 2331 | F5      | ENST00000367796 | p.K565T | c.1694    | 0.022860488 | 0     | 1 |
| 2332 | RGN     | ENST00000352078 | p.G17D  | c.50      | 0.152090295 | 2.717 | 1 |
| 2332 | RGN     | ENST00000352078 | p.C262W | c.786     | 0.152090295 | 0     | 1 |
| 2333 | CD180   | ENST00000256447 | p.S541G | c.1621    | 0.110337875 | 0     | 1 |
| 2333 | CD180   | ENST00000256447 | p.Q568H | c.1704    | 0.110337875 | 3.18  | 1 |
| 2334 | IKBKB   | ENST00000520810 | p.E398D | c.1194    | 0.005347202 | 0     | 1 |
| 2334 | IKBKB   | ENST00000520810 | p.L612H | c.1835    | 0.005347202 | 7.547 | 1 |
| 2335 | TBC1D20 | ENST00000461304 | p.H246N | c.736     | 0.166418832 | 0     | 1 |
| 2335 | TBC1D20 | ENST00000461304 | p.F299C | c.896     | 0.096198697 | 3.485 | 1 |
| 2335 | TBC1D20 | ENST00000461304 | p.P304S | c.910     | 0.083993262 | 3.697 | 1 |
| 2336 | PARP1   | ENST00000366794 | p.R857Q | c.2570    | 0.034291623 | 0     | 1 |
| 2336 | PARP1   | ENST00000366794 | p.V948I | c.2842    | 0.034291623 | 4.866 | 1 |
| 2337 | PSAT1   | ENST00000376588 | p.D68Y  | c.202     | 0.004459198 | 7.809 | 1 |
| 2337 | PSAT1   | ENST00000376588 | p.A171T | c.511     | 0.020347565 | 5.619 | 1 |
| 2337 | PSAT1   | ENST00000376588 | p.R213H | c.638     | 0.024806764 | 0     | 1 |
| 2339 | KDM1B   | ENST00000388870 | p.V430I | c.1288    | 0.088193076 | 3.56  | 1 |
| 2339 | KDM1B   | ENST00000388870 | p.A664D | c.1991    | 0.043568004 | 4.638 | 1 |
| 2339 | KDM1B   | ENST00000388870 | p.V709M | c.2125    | 0.124950469 | 0     | 1 |
| 2340 | GRM5    | ENST00000305447 | p.D258N | c.772     | 0.101089898 | 0     | 1 |
| 2340 | GRM5    | ENST00000305447 | p.M290V | c.868     | 0.014611242 | 6.218 | 1 |
| 2340 | GRM5    | ENST00000305447 | p.R292C | c.874     | 0.094920973 | 3.512 | 1 |
| 2341 | P2RY6   | ENST00000538328 | p.R174H | c.521     | 0.141708677 | 2.819 | 1 |
| 2341 | P2RY6   | ENST00000538328 | p.A280S | c.838     | 0.141708677 | 0     | 1 |
| 2342 | CLIC2   | ENST00000369449 | p.L36R  | c.107     | 0.079219533 | 0     | 1 |
| 2342 | CLIC2   | ENST00000369449 | p.I86M  | c.258     | 0.079219533 | 3.658 | 1 |
| 2343 | CYP11A1 | ENST00000268053 | p.V213I | c.637     | 0.100203166 | 0     | 1 |
| 2343 | CYP11A1 | ENST00000268053 | p.G300V | c.899     | 0.100203166 | 3.319 | 1 |
| 2344 | XRCC6   | ENST00000405878 | p.Y71H  | c.211     | 0.005310267 | 0     | 1 |
| 2344 | XRCC6   | ENST00000405878 | p.I116S | c.347     | 0.005310267 | 7.557 | 1 |
| 2345 | ELAC1   | ENST00000269466 | p.F173C | c.518     | 0.00768361  | 0     | 1 |
| 2345 | ELAC1   | ENST00000269466 | p.R27W  | c.79      | 0.00768361  | 7.024 | 1 |
| 2346 | FOXM1   | ENST00000342628 | p.M242K | c.725     | 0.071412085 | 0     | 1 |
| 2346 | FOXM1   | ENST00000342628 | p.N288S | c.863     | 0.064168097 | 3.962 | 1 |
| 2346 | FOXM1   | ENST00000342628 | p.L318F | c.954     | 0.007243989 | 7.109 | 1 |
| 2347 | DPP3    | ENST00000531863 | p.E384A | c.1151    | 0.011056204 | 6.499 | 1 |
| 2347 | DPP3    | ENST00000531863 | p.R510W | c.1528    | 0.011056204 | 0     | 1 |
| 2348 | ITGAM   | ENST00000544665 | p.S569N | c.1706    | 0.014437853 | 6.114 | 1 |
| 2348 | ITGAM   | ENST00000544665 | p.F17L  | c.51      | 0.014437853 | 0     | 1 |
| 2349 | MAPK9   | ENST00000343111 | p.V54D  | c.161     | 0.012686045 | 7.386 | 1 |
| 2349 | MAPK9   | ENST00000343111 | p.H82Y  | c.244     | 0.013461659 | 6.215 | 1 |
| 2349 | MAPK9   | ENST00000343111 | p.E109K | c.325     | 0.019440162 | 0     | 1 |

|               |                 |         |             |             |       |   |
|---------------|-----------------|---------|-------------|-------------|-------|---|
| 2350 RRM2B    | ENST00000522368 | p.F95L  | c.285       | 0.036099344 | 0     | 1 |
| 2350 RRM2B    | ENST00000522368 | p.E223Q | c.667       | 0.011135916 | 6.46  | 1 |
| 2351 ANG      | ENST00000397990 | p.V7I   | c.19        | 1.011195013 | 0     | 2 |
| 2351 ANG      | ENST00000397990 | p.S111F | c.332       | 0.107885982 | 6.481 | 1 |
| 2352 PLA2G4A  | ENST00000367466 | p.E254K | c.760       | 0.033655824 | 0     | 1 |
| 2352 PLA2G4A  | ENST00000367466 | p.R307I | c.920       | 0.033655824 | 4.893 | 1 |
| 2353 GRM1     | ENST00000282753 | p.G234V | c.701       | 1.032447593 | 0     | 1 |
| 2353 GRM1     | ENST00000282753 | p.G234E | c.701_702   | 1.032447593 | 0     | 1 |
| 2353 GRM1     | ENST00000282753 | p.I261L | c.781       | 0.025120343 | 6.315 | 1 |
| 2353 GRM1     | ENST00000282753 | p.E292K | c.874       | 0.072715199 | 5.652 | 1 |
| 2354 DARS2    | ENST00000361951 | p.Q73K  | c.217       | 0.006587743 | 7.246 | 1 |
| 2354 DARS2    | ENST00000361951 | p.F162L | c.486       | 0.006587743 | 0     | 1 |
| 2355 SETD7    | ENST00000274031 | p.R249Q | c.746       | 0.128247268 | 0     | 1 |
| 2355 SETD7    | ENST00000274031 | p.F313I | c.937       | 0.128247268 | 2.963 | 1 |
| 2356 HK3      | ENST00000292432 | p.T546M | c.1637      | 0.003217152 | 8.28  | 1 |
| 2356 HK3      | ENST00000292432 | p.D867Y | c.2599      | 0.003217152 | 0     | 1 |
| 2357 SYTL4    | ENST00000454200 | p.A363T | c.1087_1086 | 1.112815416 | 0     | 1 |
| 2357 SYTL4    | ENST00000454200 | p.A363D | c.1088      | 1.112815416 | 0     | 1 |
| 2357 SYTL4    | ENST00000454200 | p.F364L | c.1090      | 0.158459968 | 6.247 | 1 |
| 2357 SYTL4    | ENST00000454200 | p.H478L | c.1433      | 0.331425374 | 3.327 | 1 |
| 2358 HIF1A    | ENST00000539097 | p.V365I | c.1093      | 0.066985841 | 3.9   | 1 |
| 2358 HIF1A    | ENST00000539097 | p.L286S | c.857       | 0.066985841 | 0     | 1 |
| 2359 PRKCI    | ENST00000295797 | p.N336K | c.1008      | 0.161596856 | 3.848 | 1 |
| 2359 PRKCI    | ENST00000295797 | p.G338R | c.1012      | 0.16368156  | 2.814 | 1 |
| 2359 PRKCI    | ENST00000295797 | p.L386M | c.1156      | 0.217358655 | 0     | 1 |
| 2359 PRKCI    | ENST00000295797 | p.G548C | c.1642      | 0.079327277 | 7.856 | 1 |
| 2359 PRKCI    | ENST00000295797 | p.L549F | c.1647      | 0.022771331 | 9.483 | 1 |
| 2360 MSL3     | ENST00000312196 | p.A453T | c.1357      | 0.086389513 | 3.533 | 1 |
| 2360 MSL3     | ENST00000312196 | p.F498L | c.1494      | 0.086389513 | 0     | 1 |
| 2361 CAPN7    | ENST00000253693 | p.R691P | c.2072      | 0.156463855 | 0     | 1 |
| 2361 CAPN7    | ENST00000253693 | p.R732L | c.2195      | 0.148167734 | 3.968 | 1 |
| 2361 CAPN7    | ENST00000253693 | p.F769Y | c.2306      | 0.083699625 | 7.636 | 1 |
| 2361 CAPN7    | ENST00000253693 | p.L799M | c.2395      | 0.093128398 | 3.514 | 1 |
| 2362 ARID3A   | ENST00000263620 | p.L245V | c.733       | 0.06185612  | 0     | 1 |
| 2362 ARID3A   | ENST00000263620 | p.M274T | c.821       | 0.028915763 | 5.112 | 1 |
| 2362 ARID3A   | ENST00000263620 | p.L322M | c.964       | 0.032940357 | 4.924 | 1 |
| 2363 TYK2     | ENST00000264818 | p.R381L | c.1142      | 0.072580686 | 3.933 | 1 |
| 2363 TYK2     | ENST00000264818 | p.R565W | c.1693      | 0.176778465 | 0     | 1 |
| 2363 TYK2     | ENST00000264818 | p.G271C | c.811       | 0.027713438 | 8.525 | 1 |
| 2363 TYK2     | ENST00000264818 | p.G320V | c.959       | 0.140701205 | 3.203 | 1 |
| 2364 CYP2A6   | ENST00000301141 | p.R437W | c.1309      | 0.133219376 | 3.036 | 1 |
| 2364 CYP2A6   | ENST00000301141 | p.V116M | c.346       | 0.214603123 | 0     | 1 |
| 2364 CYP2A6   | ENST00000301141 | p.F267L | c.801       | 0.094264913 | 6.852 | 1 |
| 2364 CYP2A6   | ENST00000301141 | p.T295M | c.884       | 0.189504338 | 3.573 | 1 |
| 2365 SERPINB3 | ENST00000283752 | p.H220Y | c.658       | 0.081525366 | 0     | 1 |
| 2365 SERPINB3 | ENST00000283752 | p.S242N | c.725       | 0.003936148 | 7.989 | 1 |
| 2365 SERPINB3 | ENST00000283752 | p.R276S | c.828       | 0.077589218 | 3.688 | 1 |
| 2366 SIRT2    | ENST00000249396 | p.L341M | c.1021      | 0.020084419 | 5.935 | 1 |
| 2366 SIRT2    | ENST00000249396 | p.R153C | c.457       | 0.245119869 | 0     | 1 |

|      |         |                 |          |        |             |       |   |
|------|---------|-----------------|----------|--------|-------------|-------|---|
| 2366 | SIRT2   | ENST00000249396 | p.G177W  | c.529  | 0.232514134 | 2.128 | 1 |
| 2368 | EFNA1   | ENST00000368407 | p.R139C  | c.415  | 1.094666645 | 0     | 1 |
| 2368 | EFNA1   | ENST00000368407 | p.R139H  | c.416  | 1.094666645 | 0     | 1 |
| 2368 | EFNA1   | ENST00000368407 | p.R33Q   | c.98   | 0.189333289 | 3.401 | 1 |
| 2369 | GALNT10 | ENST00000297107 | p.P364S  | c.1090 | 0.100381056 | 0     | 1 |
| 2369 | GALNT10 | ENST00000297107 | p.P264R  | c.791  | 0.016537474 | 6.036 | 1 |
| 2369 | GALNT10 | ENST00000297107 | p.D310Y  | c.928  | 0.086438672 | 3.554 | 1 |
| 2370 | PTPRC   | ENST00000442510 | p.P668S  | c.2002 | 0.150517173 | 0     | 1 |
| 2370 | PTPRC   | ENST00000442510 | p.D690N  | c.2068 | 0.150517173 | 2.732 | 1 |
| 2371 | HDAC3   | ENST00000305264 | p.Q52R   | c.155  | 0.120435048 | 5.685 | 1 |
| 2371 | HDAC3   | ENST00000305264 | p.R106C  | c.316  | 0.084730347 | 9.301 | 1 |
| 2371 | HDAC3   | ENST00000305264 | p.A110T  | c.328  | 1.021023013 | 0     | 2 |
| 2372 | TRAF6   | ENST00000348124 | p.G86S   | c.256  | 0.016561762 | 5.916 | 1 |
| 2372 | TRAF6   | ENST00000348124 | p.D120N  | c.358  | 0.016561762 | 0     | 1 |
| 2373 | TCN1    | ENST00000257264 | p.R106C  | c.316  | 0.154774889 | 0     | 1 |
| 2373 | TCN1    | ENST00000257264 | p.S307Y  | c.920  | 0.059164148 | 4.218 | 1 |
| 2373 | TCN1    | ENST00000257264 | p.C308W  | c.924  | 0.106469477 | 3.307 | 1 |
| 2374 | POFUT2  | ENST00000349485 | p.G401A  | c.1202 | 0.004331253 | 7.851 | 1 |
| 2374 | POFUT2  | ENST00000349485 | p.D263N  | c.787  | 0.005497533 | 7.507 | 1 |
| 2374 | POFUT2  | ENST00000349485 | p.G285W  | c.853  | 0.009828785 | 0     | 1 |
| 2375 | IL21R   | ENST00000395755 | p.R139H  | c.416  | 0.050155154 | 4.563 | 1 |
| 2375 | IL21R   | ENST00000395755 | p.E143K  | c.427  | 0.131285423 | 2.989 | 1 |
| 2375 | IL21R   | ENST00000395755 | p.R181I  | c.542  | 0.168262541 | 0     | 1 |
| 2376 | MPP1    | ENST00000428488 | p.E36K   | c.106  | 0.078020659 | 0     | 1 |
| 2377 | CHI3L2  | ENST00000445067 | p.F63C   | c.188  | 0.00565993  | 8.465 | 1 |
| 2377 | CHI3L2  | ENST00000445067 | p.L98I   | c.292  | 1.098818107 | 0     | 2 |
| 2377 | CHI3L2  | ENST00000445067 | p.G139A  | c.416  | 0.196227231 | 3.381 | 1 |
| 2378 | PVRL1   | ENST00000264025 | p.G44D   | c.131  | 0.005255341 | 7.572 | 1 |
| 2378 | PVRL1   | ENST00000264025 | p.R96C   | c.286  | 0.005255341 | 0     | 1 |
| 2380 | ROR2    | ENST00000375708 | p.R483Q  | c.1448 | 0.32672249  | 7.371 | 1 |
| 2380 | ROR2    | ENST00000375708 | p.S607F  | c.1820 | 0.017531011 | 6.922 | 1 |
| 2380 | ROR2    | ENST00000375708 | p.D672N  | c.2014 | 1.140156944 | 0     | 2 |
| 2380 | ROR2    | ENST00000375708 | p.P733S  | c.2197 | 0.313568391 | 2.99  | 1 |
| 2381 | POLG2   | ENST00000539111 | p.N272H  | c.814  | 0.013313189 | 7.231 | 1 |
| 2381 | POLG2   | ENST00000539111 | p.P294S  | c.880  | 1.006656594 | 0     | 1 |
| 2381 | POLG2   | ENST00000539111 | p.P294L  | c.881  | 1.006656594 | 0     | 1 |
| 2382 | TBP     | ENST00000392092 | p.R186C  | c.556  | 1.020277342 | 0     | 2 |
| 2382 | TBP     | ENST00000392092 | p.A211T  | c.631  | 0.072678639 | 6.321 | 1 |
| 2382 | TBP     | ENST00000392092 | p.V241A  | c.722  | 0.015538596 | 7.008 | 1 |
| 2383 | DICER1  | ENST00000343455 | p.V776F  | c.2326 | 0.028183606 | 5.149 | 1 |
| 2383 | DICER1  | ENST00000343455 | p.S828F  | c.2483 | 0.028183606 | 0     | 1 |
| 2384 | ITGAX   | ENST00000562522 | p.L528Q  | c.1583 | 0.083083109 | 0     | 1 |
| 2384 | ITGAX   | ENST00000562522 | p.Q592E  | c.1774 | 0.038960515 | 5.364 | 1 |
| 2384 | ITGAX   | ENST00000562522 | p.T615A  | c.1843 | 0.073252414 | 4.088 | 1 |
| 2385 | GFRA3   | ENST00000274721 | p.L163R  | c.488  | 0.003107564 | 8.33  | 1 |
| 2385 | GFRA3   | ENST00000274721 | p.D224N  | c.670  | 0.003107564 | 0     | 1 |
| 2386 | PASK    | ENST00000358649 | p.A1177T | c.3529 | 0.014043049 | 6.154 | 1 |
| 2386 | PASK    | ENST00000358649 | p.V1217E | c.3650 | 0.014043049 | 0     | 1 |
| 2387 | TTPA    | ENST00000260116 | p.W122C  | c.366  | 0.053324216 | 4.317 | 1 |

|      |          |                 |                     |           |             |       |   |
|------|----------|-----------------|---------------------|-----------|-------------|-------|---|
| 2387 | TTPA     | ENST00000260116 | p.I171M             | c.513     | 0.113018623 | 0     | 1 |
| 2387 | TTPA     | ENST00000260116 | p.V206A             | c.617     | 0.066000665 | 3.992 | 1 |
| 2388 | CAPNS1   | ENST00000587718 | p.R145H             | c.434     | 0.066292984 | 3.915 | 1 |
| 2389 | JAG1     | ENST00000254958 | p.E38D              | c.114     | 0.008026574 | 6.961 | 1 |
| 2389 | JAG1     | ENST00000254958 | p.S41F              | c.122     | 0.006712193 | 7.219 | 1 |
| 2389 | JAG1     | ENST00000254958 | p.LK170in_frame_del | c.514_509 | 0.014738767 | 0     | 1 |
| 2390 | NOTCH1   | ENST00000277541 | p.L1920P            | c.5759    | 0.076179452 | 3.742 | 1 |
| 2390 | NOTCH1   | ENST00000277541 | p.N1922S            | c.5765    | 0.020717389 | 5.697 | 1 |
| 2390 | NOTCH1   | ENST00000277541 | p.S1951N            | c.5852    | 0.094015412 | 0     | 1 |
| 2391 | IL2      | ENST00000226730 | p.E82K              | c.244     | 0.03636963  | 0     | 1 |
| 2391 | IL2      | ENST00000226730 | p.R103M             | c.308     | 0.008680537 | 6.848 | 1 |
| 2391 | IL2      | ENST00000226730 | p.T131K             | c.392     | 0.007704943 | 7.02  | 1 |
| 2391 | IL2      | ENST00000226730 | p.R140I             | c.419     | 0.01998415  | 5.645 | 1 |
| 2392 | PFN2     | ENST00000498307 | p.G74R              | c.220     | 0.070121468 | 3.834 | 1 |
| 2392 | PFN2     | ENST00000498307 | p.V31F              | c.91      | 0.079070826 | 0     | 1 |
| 2393 | CD40LG   | ENST00000370629 | p.A123V             | c.368     | 0.045879707 | 4.446 | 1 |
| 2393 | CD40LG   | ENST00000370629 | p.A124S             | c.370     | 0.009739072 | 6.682 | 1 |
| 2393 | CD40LG   | ENST00000370629 | p.N150K             | c.450     | 0.055618779 | 0     | 1 |
| 2394 | GABBR2   | ENST00000259455 | p.G113E             | c.338     | 0.068203992 | 3.874 | 1 |
| 2394 | GABBR2   | ENST00000259455 | p.V138A             | c.413     | 0.068203992 | 0     | 1 |
| 2395 | KAL1     | ENST00000262648 | p.R506W             | c.1516    | 1           | 0     | 1 |
| 2395 | KAL1     | ENST00000262648 | p.R506Q             | c.1517    | 1           | 0     | 1 |
| 2396 | ASH2L    | ENST00000343823 | p.V485I             | c.1453    | 0.051474439 | 4.28  | 1 |
| 2396 | ASH2L    | ENST00000343823 | p.K583N             | c.1749    | 0.051474439 | 0     | 1 |
| 2397 | PLA2G4A  | ENST00000367466 | p.N555T             | c.1664    | 0.163535805 | 0     | 1 |
| 2397 | PLA2G4A  | ENST00000367466 | p.G196V             | c.587     | 0.150417783 | 2.755 | 1 |
| 2397 | PLA2G4A  | ENST00000367466 | p.A201T             | c.601     | 0.025949804 | 6.021 | 1 |
| 2398 | PLA2G7   | ENST00000274793 | p.P57L              | c.170     | 0.016700094 | 5.904 | 1 |
| 2398 | PLA2G7   | ENST00000274793 | p.L96I              | c.286     | 0.038794609 | 4.688 | 1 |
| 2398 | PLA2G7   | ENST00000274793 | p.T130A             | c.388     | 0.055494703 | 0     | 1 |
| 2399 | IFIT1    | ENST00000371804 | p.R255Q             | c.764     | 0.008584799 | 6.864 | 1 |
| 2399 | IFIT1    | ENST00000371804 | p.K276Q             | c.826     | 0.008584799 | 0     | 1 |
| 2400 | HSD17B14 | ENST00000263278 | p.E100D             | c.300     | 0.086030975 | 3.539 | 1 |
| 2400 | HSD17B14 | ENST00000263278 | p.R130Q             | c.389     | 0.086030975 | 0     | 1 |
| 2401 | ITGA5    | ENST00000293379 | p.R119W             | c.355     | 0.012310217 | 0     | 1 |
| 2401 | ITGA5    | ENST00000293379 | p.Y246C             | c.737     | 0.012310217 | 6.344 | 1 |
| 2402 | PTPRM    | ENST00000400060 | p.A893T             | c.2677    | 0.109664844 | 3.406 | 1 |
| 2402 | PTPRM    | ENST00000400060 | p.I894T             | c.2681    | 0.123284608 | 3.221 | 1 |
| 2402 | PTPRM    | ENST00000400060 | p.R895W             | c.2683    | 0.066336157 | 4.179 | 1 |
| 2402 | PTPRM    | ENST00000400060 | p.V1134A            | c.3401    | 0.25679263  | 0     | 1 |
| 2403 | ENPEP    | ENST00000265162 | p.P545R             | c.1634    | 0.116629124 | 3.1   | 1 |
| 2403 | ENPEP    | ENST00000265162 | p.R628C             | c.1882    | 0.116629124 | 0     | 1 |
| 2404 | HDC      | ENST00000267845 | p.G221E             | c.662     | 0.004629269 | 7.755 | 1 |
| 2404 | HDC      | ENST00000267845 | p.E229K             | c.685     | 0.015711884 | 5.992 | 1 |
| 2404 | HDC      | ENST00000267845 | p.R265H             | c.794     | 0.020341153 | 0     | 1 |
| 2405 | FGFR2    | ENST00000457416 | p.M538I             | c.1614    | 0.022127741 | 5.498 | 1 |
| 2405 | FGFR2    | ENST00000457416 | p.H545Q             | c.1635    | 0.024647607 | 6.028 | 1 |
| 2405 | FGFR2    | ENST00000457416 | p.L618F             | c.1854    | 0.037452413 | 0     | 1 |
| 2406 | PARN     | ENST00000437198 | p.M428I             | c.1284    | 0.004629269 | 0     | 1 |

|               |                 |         |        |             |       |   |
|---------------|-----------------|---------|--------|-------------|-------|---|
| 2406 PARN     | ENST00000437198 | p.S309R | c.925  | 0.004629269 | 7.755 | 1 |
| 2407 TRAPPC4  | ENST00000533058 | p.K41N  | c.123  | 0.005459558 | 0     | 1 |
| 2407 TRAPPC4  | ENST00000533058 | p.L86M  | c.256  | 0.005459558 | 7.517 | 1 |
| 2408 TUSC3    | ENST00000503731 | p.S115F | c.344  | 0.244420785 | 0     | 1 |
| 2408 TUSC3    | ENST00000503731 | p.Y118D | c.352  | 0.082706207 | 6.635 | 1 |
| 2408 TUSC3    | ENST00000503731 | p.V192I | c.574  | 0.109131494 | 3.383 | 1 |
| 2408 TUSC3    | ENST00000503731 | p.F193L | c.577  | 0.224425003 | 2.852 | 1 |
| 2409 BCHE     | ENST00000264381 | p.R375I | c.1124 | 0.160473174 | 0     | 1 |
| 2409 BCHE     | ENST00000264381 | p.D407Y | c.1219 | 0.150942641 | 2.744 | 1 |
| 2409 BCHE     | ENST00000264381 | p.R409I | c.1226 | 0.012875018 | 6.48  | 1 |
| 2410 RBPJ     | ENST00000342295 | p.G375R | c.1123 | 0.138504043 | 2.852 | 1 |
| 2410 RBPJ     | ENST00000342295 | p.E399K | c.1195 | 0.138504043 | 0     | 1 |
| 2411 IFIH1    | ENST00000263642 | p.K351E | c.1051 | 0.011249463 | 6.474 | 1 |
| 2411 IFIH1    | ENST00000263642 | p.R386C | c.1156 | 0.011249463 | 0     | 1 |
| 2412 RND1     | ENST00000309739 | p.S85L  | c.254  | 0.01020203  | 6.615 | 1 |
| 2412 RND1     | ENST00000309739 | p.A87V  | c.260  | 0.025035267 | 5.384 | 1 |
| 2412 RND1     | ENST00000309739 | p.C14F  | c.41   | 0.079585858 | 0     | 1 |
| 2412 RND1     | ENST00000309739 | p.S184T | c.550  | 0.046524721 | 4.46  | 1 |
| 2413 TH       | ENST00000381178 | p.R481H | c.1442 | 0.013696964 | 6.19  | 1 |
| 2413 TH       | ENST00000381178 | p.S487F | c.1460 | 0.051189794 | 4.288 | 1 |
| 2413 TH       | ENST00000381178 | p.V488M | c.1462 | 0.014431398 | 7.083 | 1 |
| 2413 TH       | ENST00000381178 | p.H522Y | c.1564 | 0.07226248  | 0     | 1 |
| 2414 MYBPC1   | ENST00000452455 | p.R338T | c.1013 | 0.21733614  | 0     | 1 |
| 2414 MYBPC1   | ENST00000452455 | p.K266N | c.798  | 0.21733614  | 2.202 | 1 |
| 2415 NCF2     | ENST00000367535 | p.R246H | c.737  | 0.049343368 | 4.341 | 1 |
| 2415 NCF2     | ENST00000367535 | p.L288F | c.862  | 0.049343368 | 0     | 1 |
| 2416 MAOB     | ENST00000378069 | p.N336S | c.1007 | 0.014548585 | 9.785 | 1 |
| 2416 MAOB     | ENST00000378069 | p.V371I | c.1111 | 0.100920765 | 0     | 1 |
| 2416 MAOB     | ENST00000378069 | p.H90Y  | c.268  | 0.016584998 | 6.031 | 1 |
| 2416 MAOB     | ENST00000378069 | p.P304R | c.911  | 0.099201672 | 3.565 | 1 |
| 2417 UPF1     | ENST00000599848 | p.R433K | c.1298 | 0.026241609 | 5.252 | 1 |
| 2417 UPF1     | ENST00000599848 | p.Q651K | c.1951 | 0.026241609 | 0     | 1 |
| 2418 CHI3L2   | ENST00000445067 | p.Y336C | c.1007 | 0.01531984  | 0     | 1 |
| 2418 CHI3L2   | ENST00000445067 | p.L379I | c.1135 | 0.006853231 | 7.189 | 1 |
| 2418 CHI3L2   | ENST00000445067 | p.K315N | c.945  | 0.008466609 | 6.884 | 1 |
| 2419 TBL1XR1  | ENST00000457928 | p.C490S | c.1469 | 0.096388177 | 0     | 1 |
| 2419 TBL1XR1  | ENST00000457928 | p.W177C | c.531  | 0.096388177 | 3.375 | 1 |
| 2420 ACSM2A   | ENST00000424070 | p.A93T  | c.277  | 0.0465847   | 4.424 | 1 |
| 2420 ACSM2A   | ENST00000424070 | p.V122M | c.364  | 0.0465847   | 0     | 1 |
| 2421 ERI3     | ENST00000372257 | p.C155R | c.463  | 0.078345814 | 3.674 | 1 |
| 2421 ERI3     | ENST00000372257 | p.F199L | c.597  | 0.078345814 | 0     | 1 |
| 2422 EHMT1    | ENST00000460843 | p.A780T | c.2338 | 0.07062711  | 4.101 | 1 |
| 2422 EHMT1    | ENST00000460843 | p.P809L | c.2426 | 0.070843036 | 0     | 1 |
| 2422 EHMT1    | ENST00000460843 | p.A837T | c.2509 | 0.012568881 | 6.314 | 1 |
| 2423 CYP1A1   | ENST00000567032 | p.S363Y | c.1088 | 0.003778423 | 8.048 | 1 |
| 2423 CYP1A1   | ENST00000567032 | p.A438V | c.1313 | 0.003778423 | 0     | 1 |
| 2424 HIST1H1B | ENST00000331442 | p.A177V | c.530  | 0.022530139 | 5.472 | 1 |
| 2424 HIST1H1B | ENST00000331442 | p.A206T | c.616  | 0.022530139 | 0     | 1 |
| 2425 TDP1     | ENST00000393454 | p.A383T | c.1147 | 0.013175486 | 0     | 1 |



|      |         |                 |          |             |             |       |   |
|------|---------|-----------------|----------|-------------|-------------|-------|---|
| 2425 | TDP1    | ENST00000393454 | p.P545L  | c.1634      | 0.013175486 | 6.246 | 1 |
| 2426 | DDX41   | ENST00000330503 | p.E435K  | c.1303      | 0.007583082 | 0     | 1 |
| 2426 | DDX41   | ENST00000330503 | p.K556E  | c.1666      | 0.007583082 | 7.043 | 1 |
| 2427 | MCTS1   | ENST00000371315 | p.E58K   | c.172       | 0.005463344 | 7.516 | 1 |
| 2427 | MCTS1   | ENST00000371315 | p.F105S  | c.314       | 0.009271381 | 6.753 | 1 |
| 2428 | RAB9B   | ENST00000243298 | p.C82Y   | c.245       | 0.1016724   | 3.298 | 1 |
| 2428 | RAB9B   | ENST00000243298 | p.K9T    | c.26        | 0.1016724   | 0     | 1 |
| 2429 | FGFR2   | ENST00000457416 | p.R626Q  | c.1877      | 0.505842144 | 2.739 | 1 |
| 2429 | FGFR2   | ENST00000457416 | p.D656G  | c.1967      | 0.077459796 | 9.777 | 1 |
| 2429 | FGFR2   | ENST00000457416 | p.K660E  | c.1978      | 2.158248129 | 0     | 2 |
| 2429 | FGFR2   | ENST00000457416 | p.K660N  | c.1980      | 2.158248129 | 0     | 1 |
| 2429 | FGFR2   | ENST00000457416 | p.R665W  | c.1993      | 1.035412975 | 8.094 | 2 |
| 2430 | PTK2    | ENST00000519419 | p.H85Y   | c.253       | 0.008032139 | 6.96  | 1 |
| 2430 | PTK2    | ENST00000519419 | p.R130C  | c.388       | 0.07932943  | 3.656 | 1 |
| 2430 | PTK2    | ENST00000519419 | p.K165I  | c.494       | 0.08736157  | 0     | 1 |
| 2431 | RQCD1   | ENST00000273064 | p.L82F   | c.246       | 0.60880272  | 2.803 | 1 |
| 2431 | RQCD1   | ENST00000273064 | p.S87P   | c.259       | 0.934521876 | 2.157 | 1 |
| 2431 | RQCD1   | ENST00000273064 | p.N88K   | c.264       | 0.107232294 | 5.348 | 1 |
| 2431 | RQCD1   | ENST00000273064 | p.P131L  | c.392       | 3.392063329 | 0     | 4 |
| 2432 | GRB10   | ENST00000398812 | p.S503F  | c.1508      | 0.019573304 | 5.797 | 1 |
| 2432 | GRB10   | ENST00000398812 | p.H504Q  | c.1512      | 0.089853431 | 3.502 | 1 |
| 2432 | GRB10   | ENST00000398812 | p.I539M  | c.1617      | 0.106251674 | 0     | 1 |
| 2433 | TTR     | ENST00000237014 | p.T79I   | c.236       | 0.029584801 | 5.079 | 1 |
| 2433 | TTR     | ENST00000237014 | p.S120Y  | c.359       | 0.016992006 | 5.879 | 1 |
| 2433 | TTR     | ENST00000237014 | p.E19D   | c.57        | 0.046576807 | 0     | 1 |
| 2434 | PAX5    | ENST00000358127 | p.P93Q   | c.279_278   | 0.001804732 | 9.114 | 1 |
| 2434 | PAX5    | ENST00000358127 | p.E97D   | c.291       | 0.001411065 | 9.469 | 1 |
| 2434 | PAX5    | ENST00000358127 | p.P130S  | c.388       | 0.003215796 | 0     | 1 |
| 2435 | U2AF2   | ENST00000308924 | p.G176E  | c.527       | 1.025984897 | 0     | 1 |
| 2435 | U2AF2   | ENST00000308924 | p.G176V  | c.527       | 1.025984897 | 0     | 1 |
| 2435 | U2AF2   | ENST00000308924 | p.Q222H  | c.666       | 0.138755112 | 5.392 | 1 |
| 2435 | U2AF2   | ENST00000308924 | p.K292N  | c.876       | 0.095465855 | 8.848 | 1 |
| 2436 | PPP2R1A | ENST00000322088 | p.R498H  | c.1493      | 0.184539301 | 2.438 | 1 |
| 2436 | PPP2R1A | ENST00000322088 | p.D531H  | c.1591      | 0.184539301 | 0     | 1 |
| 2437 | ENPEP   | ENST00000265162 | p.G202E  | c.605       | 0.130387294 | 7.747 | 1 |
| 2437 | ENPEP   | ENST00000265162 | p.S230Y  | c.689       | 0.197970483 | 4.701 | 1 |
| 2437 | ENPEP   | ENST00000265162 | p.F289C  | c.866       | 1.043101615 | 0     | 2 |
| 2438 | TBC1D4  | ENST00000377636 | p.Q946H  | c.2838      | 0.027872766 | 5.165 | 1 |
| 2438 | TBC1D4  | ENST00000377636 | p.D1037V | c.3110      | 0.027872766 | 0     | 1 |
| 2439 | SEC23A  | ENST00000307712 | p.A351T  | c.1051      | 0.010987447 | 6.508 | 1 |
| 2439 | SEC23A  | ENST00000307712 | p.R262H  | c.785       | 0.019825841 | 0     | 1 |
| 2439 | SEC23A  | ENST00000307712 | p.P298L  | c.893       | 0.008838394 | 6.822 | 1 |
| 2440 | SATB2   | ENST00000260926 | p.L504M  | c.1510_1509 | 0.222364748 | 0     | 1 |
| 2440 | SATB2   | ENST00000260926 | p.S560P  | c.1678      | 0.222364748 | 2.169 | 1 |
| 2441 | TSTA3   | ENST00000425753 | p.R214W  | c.640       | 0.110717591 | 0     | 1 |
| 2441 | TSTA3   | ENST00000425753 | p.V250I  | c.748       | 0.103593113 | 3.271 | 1 |
| 2441 | TSTA3   | ENST00000425753 | p.T273I  | c.818       | 0.007124478 | 7.133 | 1 |
| 2442 | ST14    | ENST00000278742 | p.S644F  | c.1931      | 0.068827471 | 4.26  | 1 |
| 2442 | ST14    | ENST00000278742 | p.H656P  | c.1967      | 0.141846194 | 2.891 | 1 |

|      |         |                 |          |        |             |       |   |
|------|---------|-----------------|----------|--------|-------------|-------|---|
| 2442 | ST14    | ENST00000278742 | p.E813G  | c.2438 | 0.187003049 | 0     | 1 |
| 2443 | DYSF    | ENST00000410020 | p.P45L   | c.134  | 0.12982166  | 3.085 | 1 |
| 2443 | DYSF    | ENST00000410020 | p.S117W  | c.350  | 0.061488269 | 4.336 | 1 |
| 2444 | CUBN    | ENST00000377833 | p.A1098V | c.3293 | 0.005151459 | 0     | 1 |
| 2444 | CUBN    | ENST00000377833 | p.F1123L | c.3369 | 0.003332914 | 8.229 | 1 |
| 2444 | CUBN    | ENST00000377833 | p.D1149Y | c.3445 | 0.001818545 | 9.103 | 1 |
| 2445 | CYP2A13 | ENST00000330436 | p.P75S   | c.223  | 1.042367817 | 0     | 1 |
| 2445 | CYP2A13 | ENST00000330436 | p.P75L   | c.224  | 1.042367817 | 0     | 1 |
| 2445 | CYP2A13 | ENST00000330436 | p.E103K  | c.307  | 0.02674852  | 7.317 | 1 |
| 2445 | CYP2A13 | ENST00000330436 | p.S225L  | c.674  | 0.079204659 | 4.792 | 1 |
| 2446 | PRKCC   | ENST00000263125 | p.R233S  | c.699  | 0.271307343 | 1.882 | 1 |
| 2446 | PRKCC   | ENST00000263125 | p.D263N  | c.787  | 0.271307343 | 0     | 1 |
| 2447 | H2AFY2  | ENST00000373255 | p.F272C  | c.815  | 0.012849868 | 0     | 1 |
| 2447 | H2AFY2  | ENST00000373255 | p.V309I  | c.925  | 0.007416735 | 7.075 | 1 |
| 2447 | H2AFY2  | ENST00000373255 | p.A310T  | c.928  | 0.005433133 | 7.524 | 1 |
| 2448 | KEAP1   | ENST00000171111 | p.F139L  | c.417  | 0.099364174 | 6.902 | 1 |
| 2448 | KEAP1   | ENST00000171111 | p.I145F  | c.433  | 1.109541908 | 0     | 2 |
| 2448 | KEAP1   | ENST00000171111 | p.V167F  | c.499  | 0.285001467 | 3.305 | 1 |
| 2449 | MME     | ENST00000360490 | p.L367I  | c.1099 | 0.127358682 | 6.86  | 1 |
| 2449 | MME     | ENST00000360490 | p.F375C  | c.1124 | 0.204909587 | 0     | 1 |
| 2449 | MME     | ENST00000360490 | p.D163G  | c.488  | 0.200219024 | 3.786 | 1 |
| 2449 | MME     | ENST00000360490 | p.G196W  | c.586  | 0.030975874 | 5.239 | 1 |
| 2449 | MME     | ENST00000360490 | p.K197E  | c.589  | 0.106960926 | 3.361 | 1 |
| 2450 | RYR2    | ENST00000360064 | p.R174G  | c.520  | 1.027902569 | 0     | 1 |
| 2450 | RYR2    | ENST00000360064 | p.R174Q  | c.521  | 1.027902569 | 0     | 1 |
| 2450 | RYR2    | ENST00000360064 | p.V175A  | c.524  | 0.106543637 | 9.172 | 1 |
| 2450 | RYR2    | ENST00000360064 | p.V212L  | c.634  | 0.121024791 | 5.256 | 1 |
| 2451 | MAP2K6  | ENST00000590474 | p.A189S  | c.565  | 0.121231361 | 0     | 1 |
| 2451 | MAP2K6  | ENST00000590474 | p.A325P  | c.973  | 0.103920034 | 3.294 | 1 |
| 2451 | MAP2K6  | ENST00000590474 | p.L332I  | c.994  | 0.021242022 | 5.697 | 1 |
| 2452 | MUTYH   | ENST00000450313 | p.R245H  | c.734  | 0.138476785 | 3.928 | 1 |
| 2452 | MUTYH   | ENST00000450313 | p.R307W  | c.919  | 1.065698307 | 0     | 2 |
| 2453 | CUL4A   | ENST00000375440 | p.L462F  | c.1384 | 0.074039684 | 4.04  | 1 |
| 2453 | CUL4A   | ENST00000375440 | p.L573F  | c.1719 | 0.111909813 | 0     | 1 |
| 2453 | CUL4A   | ENST00000375440 | p.Q673E  | c.2017 | 0.064367628 | 4.29  | 1 |
| 2454 | PDE8A   | ENST00000394553 | p.P730S  | c.2188 | 0.060538637 | 4.046 | 1 |
| 2454 | PDE8A   | ENST00000394553 | p.H805R  | c.2414 | 0.060538637 | 0     | 1 |
| 2455 | L3MBTL2 | ENST00000216237 | p.A436V  | c.1307 | 0.006707542 | 7.22  | 1 |
| 2455 | L3MBTL2 | ENST00000216237 | p.W510L  | c.1529 | 0.006707542 | 0     | 1 |
| 2456 | PPT1    | ENST00000433473 | p.R209L  | c.626  | 1.012413038 | 0     | 1 |
| 2456 | PPT1    | ENST00000433473 | p.R209Q  | c.626  | 1.012413038 | 0     | 1 |
| 2456 | PPT1    | ENST00000433473 | p.R268H  | c.803  | 0.024826075 | 6.332 | 1 |
| 2457 | GGPS1   | ENST00000476121 | p.A191D  | c.572  | 0.002837822 | 8.461 | 1 |
| 2457 | GGPS1   | ENST00000476121 | p.S214L  | c.641  | 0.002837822 | 0     | 1 |
| 2458 | CASP3   | ENST00000517513 | p.F114V  | c.340  | 0.242396936 | 3.132 | 1 |
| 2458 | CASP3   | ENST00000517513 | p.L118I  | c.352  | 0.175032435 | 2.793 | 1 |
| 2458 | CASP3   | ENST00000517513 | p.F143S  | c.428  | 0.13097239  | 6.451 | 1 |
| 2458 | CASP3   | ENST00000517513 | p.Q161L  | c.482  | 0.357382073 | 0     | 1 |
| 2459 | ANK1    | ENST00000396942 | p.E1012K | c.3034 | 0.093882495 | 0     | 1 |

|      |        |                 |          |             |             |       |   |
|------|--------|-----------------|----------|-------------|-------------|-------|---|
| 2459 | ANK1   | ENST00000396942 | p.P1060L | c.3179      | 0.093882495 | 3.413 | 1 |
| 2460 | TTK    | ENST00000369798 | p.H581Q  | c.1743      | 0.075834598 | 3.721 | 1 |
| 2460 | TTK    | ENST00000369798 | p.T637R  | c.1910      | 0.075834598 | 0     | 1 |
| 2461 | TOPBP1 | ENST00000260810 | p.N565D  | c.1693      | 1.037343475 | 0     | 2 |
| 2461 | TOPBP1 | ENST00000260810 | p.L670H  | c.2009      | 0.07468695  | 4.743 | 1 |
| 2462 | STAM   | ENST00000377524 | p.G212V  | c.635       | 0.022127741 | 5.498 | 1 |
| 2462 | STAM   | ENST00000377524 | p.R213Q  | c.638       | 0.031539918 | 5.534 | 1 |
| 2462 | STAM   | ENST00000377524 | p.D241G  | c.722       | 0.043710154 | 0     | 1 |
| 2463 | FOKK2  | ENST00000335255 | p.A337D  | c.1010      | 0.051723327 | 8.083 | 1 |
| 2463 | FOKK2  | ENST00000335255 | p.P259L  | c.776       | 0.210663735 | 3.588 | 1 |
| 2463 | FOKK2  | ENST00000335255 | p.R307C  | c.919       | 1.086845926 | 0     | 1 |
| 2463 | FOKK2  | ENST00000335255 | p.R307H  | c.920       | 1.086845926 | 0     | 1 |
| 2464 | RAB11A | ENST00000261890 | p.A79E   | c.236       | 0.009950605 | 6.651 | 1 |
| 2464 | RAB11A | ENST00000261890 | p.D111Y  | c.331       | 0.009950605 | 0     | 1 |
| 2465 | PVRL4  | ENST00000368012 | p.L81R   | c.242       | 0.004316268 | 7.856 | 1 |
| 2465 | PVRL4  | ENST00000368012 | p.G110S  | c.328       | 0.004316268 | 0     | 1 |
| 2466 | TJP1   | ENST00000356107 | p.L418F  | c.1252      | 0.059539875 | 4.07  | 1 |
| 2466 | TJP1   | ENST00000356107 | p.K458M  | c.1373      | 0.059539875 | 0     | 1 |
| 2467 | DPP4   | ENST00000360534 | p.T401N  | c.1202      | 0.039076044 | 0     | 1 |
| 2467 | DPP4   | ENST00000360534 | p.G424E  | c.1271      | 0.026515872 | 5.237 | 1 |
| 2467 | DPP4   | ENST00000360534 | p.Y585H  | c.1753      | 0.027048149 | 6.315 | 1 |
| 2468 | FN1    | ENST00000354785 | p.I572N  | c.1715      | 0.020263118 | 0     | 1 |
| 2468 | FN1    | ENST00000354785 | p.G593F  | c.1778_1777 | 0.020263118 | 5.625 | 1 |
| 2469 | IDE    | ENST00000265986 | p.G339R  | c.1015      | 0.103488922 | 0     | 1 |
| 2469 | IDE    | ENST00000265986 | p.P525S  | c.1573      | 0.025476222 | 5.959 | 1 |
| 2469 | IDE    | ENST00000265986 | p.Y609H  | c.1825      | 0.09681431  | 3.516 | 1 |
| 2470 | STARD5 | ENST00000302824 | p.F176L  | c.528       | 0.005193778 | 0     | 1 |
| 2470 | STARD5 | ENST00000302824 | p.R199Q  | c.596       | 0.005193778 | 7.589 | 1 |
| 2471 | SCMH1  | ENST00000326197 | p.R87H   | c.260       | 0.141134857 | 2.878 | 1 |
| 2471 | SCMH1  | ENST00000326197 | p.D100N  | c.298       | 0.042629659 | 4.736 | 1 |
| 2471 | SCMH1  | ENST00000326197 | p.P181S  | c.541       | 0.173555412 | 0     | 1 |
| 2472 | KARS   | ENST00000319410 | p.R159T  | c.476       | 0.032462688 | 6.042 | 1 |
| 2472 | KARS   | ENST00000319410 | p.H161Y  | c.481       | 0.283107998 | 2.847 | 1 |
| 2472 | KARS   | ENST00000319410 | p.R206W  | c.616       | 1.175954444 | 0     | 1 |
| 2472 | KARS   | ENST00000319410 | p.R206L  | c.617       | 1.175954444 | 0     | 1 |
| 2472 | KARS   | ENST00000319410 | p.M240I  | c.720       | 0.046614619 | 5.52  | 1 |
| 2473 | SUN2   | ENST00000405018 | p.V617A  | c.1850      | 0.06763904  | 0     | 1 |
| 2473 | SUN2   | ENST00000405018 | p.R729C  | c.2185      | 0.06763904  | 3.886 | 1 |
| 2474 | GNB1   | ENST00000378609 | p.R19L   | c.56        | 0.005937206 | 7.396 | 1 |
| 2474 | GNB1   | ENST00000378609 | p.A21S   | c.61        | 0.012988673 | 6.671 | 1 |
| 2474 | GNB1   | ENST00000378609 | p.D258N  | c.772       | 0.015750819 | 0     | 1 |
| 2475 | TLL1   | ENST00000507499 | p.A149T  | c.445       | 0.173188236 | 4.065 | 1 |
| 2475 | TLL1   | ENST00000507499 | p.R152T  | c.455       | 1.336917401 | 2.612 | 1 |
| 2475 | TLL1   | ENST00000507499 | p.R152S  | c.456       | 1.336917401 | 2.612 | 1 |
| 2475 | TLL1   | ENST00000507499 | p.E280K  | c.838       | 1.388931404 | 0     | 2 |
| 2475 | TLL1   | ENST00000507499 | p.E283Q  | c.847       | 0.063771642 | 8.937 | 1 |
| 2476 | PTK2   | ENST00000519419 | p.D962G  | c.2885      | 0.066754088 | 3.905 | 1 |
| 2476 | PTK2   | ENST00000519419 | p.T1093M | c.3278      | 0.066754088 | 0     | 1 |
| 2477 | FGB    | ENST00000302068 | p.G380D  | c.1139      | 0.014256167 | 6.492 | 1 |

|              |                 |                    |             |             |       |   |
|--------------|-----------------|--------------------|-------------|-------------|-------|---|
| 2477 FGB     | ENST00000302068 | p.A382V            | c.1145      | 0.145618617 | 5.348 | 1 |
| 2477 FGB     | ENST00000302068 | p.H438N            | c.1312      | 0.210564119 | 2.943 | 1 |
| 2477 FGB     | ENST00000302068 | p.A439T            | c.1315      | 0.296903391 | 2.707 | 1 |
| 2477 FGB     | ENST00000302068 | p.R47Q             | c.140       | 0.025231516 | 8.428 | 1 |
| 2477 FGB     | ENST00000302068 | p.M468I            | c.1404      | 0.326077803 | 0     | 1 |
| 2477 FGB     | ENST00000302068 | p.K471N            | c.1413      | 0.021708664 | 9.373 | 1 |
| 2477 FGB     | ENST00000302068 | p.G472E            | c.1415      | 0.05563636  | 8.471 | 1 |
| 2478 SENP2   | ENST00000296257 | p.A392V            | c.1175      | 0.110386419 | 3.219 | 1 |
| 2478 SENP2   | ENST00000296257 | p.Q403E            | c.1207      | 0.030844777 | 5.166 | 1 |
| 2478 SENP2   | ENST00000296257 | p.Q586P            | c.1757      | 0.135248547 | 0     | 1 |
| 2479 LMO2    | ENST00000257818 | p.R146Q            | c.437       | 0.099022544 | 6.995 | 1 |
| 2479 LMO2    | ENST00000257818 | p.R171C            | c.511       | 1.017908175 | 0     | 1 |
| 2479 LMO2    | ENST00000257818 | p.R171H            | c.512       | 1.017908175 | 0     | 1 |
| 2479 LMO2    | ENST00000257818 | p.G201A            | c.602       | 0.025956156 | 6.634 | 1 |
| 2480 HBE1    | ENST00000380237 | p.L69P             | c.206       | 0.032849153 | 0     | 1 |
| 2480 HBE1    | ENST00000380237 | p.N20S             | c.59        | 0.032849153 | 4.928 | 1 |
| 2481 BTK     | ENST00000308731 | p.R490C            | c.1468      | 0.123217055 | 4.052 | 1 |
| 2481 BTK     | ENST00000308731 | p.H491D            | c.1471      | 1.045149242 | 5.512 | 1 |
| 2481 BTK     | ENST00000308731 | p.H491Y            | c.1471      | 1.045149242 | 5.512 | 1 |
| 2481 BTK     | ENST00000308731 | p.S592F            | c.1775      | 1.104115488 | 0     | 2 |
| 2482 GBE1    | ENST00000429644 | p.R156C            | c.466       | 0.00309896  | 0     | 1 |
| 2482 GBE1    | ENST00000429644 | p.K294N            | c.882       | 0.00309896  | 8.334 | 1 |
| 2483 TTK     | ENST00000369798 | p.D566G            | c.1697      | 0.355703265 | 5.184 | 1 |
| 2483 TTK     | ENST00000369798 | p.E571K            | c.1711      | 1.524337253 | 0     | 2 |
| 2483 TTK     | ENST00000369798 | p.M600I            | c.1800      | 0.242261088 | 3.323 | 1 |
| 2483 TTK     | ENST00000369798 | p.G666R            | c.1996      | 1.297848228 | 3.435 | 1 |
| 2483 TTK     | ENST00000369798 | p.G666E            | c.1997      | 1.297848228 | 3.435 | 1 |
| 2483 TTK     | ENST00000369798 | p.A668E            | c.2003      | 0.614109715 | 2.238 | 1 |
| 2484 CYP2E1  | ENST00000252945 | p.L382R            | c.1145      | 0.119701993 | 3.271 | 1 |
| 2484 CYP2E1  | ENST00000252945 | p.T69R             | c.206       | 0.083841753 | 3.884 | 1 |
| 2484 CYP2E1  | ENST00000252945 | p.L32V             | c.94        | 0.171325986 | 0     | 1 |
| 2485 TP53BP2 | ENST00000343537 | p.L72F             | c.214       | 0.025164312 | 0     | 1 |
| 2485 TP53BP2 | ENST00000343537 | p.T13I             | c.38        | 0.022158438 | 5.496 | 1 |
| 2485 TP53BP2 | ENST00000343537 | p.V14L             | c.40        | 0.003005873 | 8.378 | 1 |
| 2486 ALAD    | ENST00000409155 | p.N27S             | c.80        | 0.019077289 | 5.712 | 1 |
| 2486 ALAD    | ENST00000409155 | p.R308S            | c.922       | 0.019077289 | 0     | 1 |
| 2487 S100A3  | ENST00000368713 | p.R51Q             | c.152       | 0.094797972 | 4.399 | 1 |
| 2487 S100A3  | ENST00000368713 | p.P97S             | c.289       | 1.047398986 | 0     | 2 |
| 2488 TPT1    | ENST00000309246 | p.E86K             | c.256       | 0.024130473 | 5.373 | 1 |
| 2488 TPT1    | ENST00000309246 | p.L126F            | c.376       | 0.024130473 | 0     | 1 |
| 2489 SEC24A  | ENST00000398844 | p.P421L            | c.1262      | 0.023179134 | 6.422 | 1 |
| 2489 SEC24A  | ENST00000398844 | p.D688N            | c.2062      | 0.176743349 | 2.517 | 1 |
| 2489 SEC24A  | ENST00000398844 | p.Y738H            | c.2212      | 0.186368203 | 0     | 1 |
| 2490 ARHGFE1 | ENST00000599846 | p.E547in_frame_del | c.1636_1638 | 0.01880161  | 5.733 | 1 |
| 2490 ARHGFE1 | ENST00000599846 | p.E637K            | c.1909      | 0.01880161  | 0     | 1 |
| 2491 ASPA    | ENST00000263080 | p.D104G            | c.311       | 0.062243957 | 0     | 1 |
| 2491 ASPA    | ENST00000263080 | p.I170T            | c.509       | 0.0476956   | 4.39  | 1 |
| 2491 ASPA    | ENST00000263080 | p.A171S            | c.511       | 0.014548357 | 6.103 | 1 |
| 2492 ELANE   | ENST00000263621 | p.W156L            | c.467       | 0.083273427 | 0     | 1 |

|      |           |                 |          |           |             |       |   |
|------|-----------|-----------------|----------|-----------|-------------|-------|---|
| 2492 | ELANE     | ENST00000263621 | p.V207I  | c.619     | 0.083273427 | 3.586 | 1 |
| 2493 | GGT1      | ENST00000406383 | p.S451L  | c.1352    | 0.181224972 | 2.512 | 1 |
| 2493 | GGT1      | ENST00000406383 | p.R107H  | c.320     | 0.209038289 | 0     | 1 |
| 2493 | GGT1      | ENST00000406383 | p.V134E  | c.401     | 0.039638448 | 4.89  | 1 |
| 2494 | TUSC3     | ENST00000503731 | p.R74L   | c.221     | 2.202329592 | 0     | 1 |
| 2494 | TUSC3     | ENST00000503731 | p.R74P   | c.221     | 2.202329592 | 0     | 1 |
| 2494 | TUSC3     | ENST00000503731 | p.R74Q   | c.221     | 2.202329592 | 0     | 1 |
| 2494 | TUSC3     | ENST00000503731 | p.V139I  | c.415     | 1.135228667 | 4.526 | 2 |
| 2494 | TUSC3     | ENST00000503731 | p.R170T  | c.509     | 0.224904857 | 3.799 | 1 |
| 2494 | TUSC3     | ENST00000503731 | p.G172E  | c.515     | 0.137958812 | 4.517 | 1 |
| 2495 | BAX       | ENST00000356483 | p.P88F   | c.262_263 | 0.261068824 | 2.439 | 1 |
| 2495 | BAX       | ENST00000356483 | p.R89Q   | c.266     | 0.20726702  | 2.619 | 1 |
| 2495 | BAX       | ENST00000356483 | p.F93L   | c.279     | 0.119738203 | 3.492 | 1 |
| 2495 | BAX       | ENST00000356483 | p.P157S  | c.469     | 0.035826485 | 7.486 | 1 |
| 2496 | RARA      | ENST00000394086 | p.S230L  | c.689     | 0.030394736 | 5.149 | 1 |
| 2496 | RARA      | ENST00000394086 | p.E231G  | c.692     | 0.08066563  | 3.672 | 1 |
| 2496 | RARA      | ENST00000394086 | p.N315S  | c.944     | 0.106638105 | 0     | 1 |
| 2497 | PAX8      | ENST00000348715 | p.K82N   | c.246     | 0.065607293 | 3.93  | 1 |
| 2497 | PAX8      | ENST00000348715 | p.N119D  | c.355     | 0.065607293 | 0     | 1 |
| 2499 | PRDX5     | ENST00000265462 | p.E69K   | c.205     | 0.097869287 | 0     | 1 |
| 2499 | PRDX5     | ENST00000265462 | p.A114D  | c.341     | 0.097869287 | 3.353 | 1 |
| 2500 | IRF3      | ENST00000601291 | p.S231F  | c.692     | 0.01880161  | 5.733 | 1 |
| 2500 | IRF3      | ENST00000601291 | p.T244R  | c.731     | 0.007954572 | 6.974 | 1 |
| 2500 | IRF3      | ENST00000601291 | p.L268M  | c.802     | 0.026756182 | 0     | 1 |
| 2501 | GLA       | ENST00000493905 | p.R105K  | c.314     | 0.126723165 | 3.732 | 1 |
| 2501 | GLA       | ENST00000493905 | p.R118C  | c.352     | 0.17119158  | 2.651 | 1 |
| 2501 | GLA       | ENST00000493905 | p.D155H  | c.463     | 0.072396817 | 8.439 | 1 |
| 2501 | GLA       | ENST00000493905 | p.D161N  | c.481     | 0.237349699 | 0     | 1 |
| 2502 | PDK4      | ENST00000005178 | p.R124Q  | c.371     | 1.065516405 | 0     | 2 |
| 2502 | PDK4      | ENST00000005178 | p.M173I  | c.519     | 0.131032809 | 3.932 | 1 |
| 2503 | SETD3     | ENST00000331768 | p.T428I  | c.1283    | 0.117933461 | 0     | 1 |
| 2503 | SETD3     | ENST00000331768 | p.A482V  | c.1445    | 0.024763502 | 5.467 | 1 |
| 2503 | SETD3     | ENST00000331768 | p.R486Q  | c.1457    | 0.097480247 | 3.391 | 1 |
| 2505 | PIK3CG    | ENST00000496166 | p.W212C  | c.636     | 0.048227505 | 4.374 | 1 |
| 2505 | PIK3CG    | ENST00000496166 | p.D238N  | c.712     | 0.048227505 | 0     | 1 |
| 2506 | SERPINA12 | ENST00000556881 | p.P263H  | c.788     | 0.016827912 | 5.893 | 1 |
| 2506 | SERPINA12 | ENST00000556881 | p.R301H  | c.902     | 0.016827912 | 0     | 1 |
| 2507 | FOLH1     | ENST00000256999 | p.S517Y  | c.1550    | 0.093160495 | 5.112 | 1 |
| 2507 | FOLH1     | ENST00000256999 | p.G702R  | c.2104    | 1.028915763 | 0     | 2 |
| 2508 | CDC37     | ENST00000222005 | p.V152M  | c.454     | 0.132954084 | 0     | 1 |
| 2508 | CDC37     | ENST00000222005 | p.Y189D  | c.565     | 0.132954084 | 2.911 | 1 |
| 2509 | TGFBR1    | ENST00000552516 | p.S420F  | c.1259    | 0.089126607 | 3.488 | 1 |
| 2509 | TGFBR1    | ENST00000552516 | p.T300I  | c.899     | 0.089126607 | 0     | 1 |
| 2510 | PEX5      | ENST00000412720 | p.P504S  | c.1510    | 0.011646175 | 7.424 | 1 |
| 2510 | PEX5      | ENST00000412720 | p.E571K  | c.1711    | 0.284007316 | 2.816 | 1 |
| 2510 | PEX5      | ENST00000412720 | p.P613L  | c.1838    | 1.147826746 | 0     | 2 |
| 2511 | FLT1      | ENST00000282397 | p.A1025G | c.3074    | 0.155539345 | 2.713 | 1 |
| 2511 | FLT1      | ENST00000282397 | p.D1052N | c.3154    | 0.02287289  | 5.655 | 1 |
| 2511 | FLT1      | ENST00000282397 | p.E1091K | c.3271    | 0.172358673 | 0     | 1 |

|      |          |                 |          |             |             |       |   |
|------|----------|-----------------|----------|-------------|-------------|-------|---|
| 2512 | MTRR     | ENST00000264668 | p.M683I  | c.2049      | 0.047563543 | 4.394 | 1 |
| 2512 | MTRR     | ENST00000264668 | p.I723T  | c.2168      | 0.047563543 | 0     | 1 |
| 2513 | KDM6B    | ENST00000254846 | p.L1181P | c.3542      | 0.077160163 | 3.696 | 1 |
| 2513 | KDM6B    | ENST00000254846 | p.Y1445C | c.4334      | 0.077160163 | 0     | 1 |
| 2514 | C3       | ENST00000245907 | p.R679Q  | c.2036      | 0.027718635 | 0     | 1 |
| 2514 | C3       | ENST00000245907 | p.E700Q  | c.2098      | 0.027718635 | 5.173 | 1 |
| 2515 | CSF1R    | ENST00000286301 | p.Y360C  | c.1079      | 0.09460002  | 3.528 | 1 |
| 2515 | CSF1R    | ENST00000286301 | p.N302H  | c.904       | 0.099162585 | 3.454 | 1 |
| 2515 | CSF1R    | ENST00000286301 | p.V325M  | c.973       | 0.177941436 | 0     | 1 |
| 2516 | CTSG     | ENST00000216336 | p.A36V   | c.107       | 0.074376981 | 0     | 1 |
| 2516 | CTSG     | ENST00000216336 | p.D57N   | c.169       | 0.074376981 | 3.749 | 1 |
| 2517 | FBXW7    | ENST00000603548 | p.D642G  | c.1925      | 0.236340355 | 4.718 | 1 |
| 2517 | FBXW7    | ENST00000603548 | p.G669V  | c.2006      | 0.055166593 | 9.149 | 1 |
| 2517 | FBXW7    | ENST00000603548 | p.R689W  | c.2065      | 4.039757703 | 0     | 4 |
| 2517 | FBXW7    | ENST00000603548 | p.R689Q  | c.2066      | 4.039757703 | 0     | 1 |
| 2518 | CRYBA4   | ENST00000354760 | p.A98S   | c.292       | 0.04923925  | 7.809 | 1 |
| 2518 | CRYBA4   | ENST00000354760 | p.C99F   | c.296       | 0.210397176 | 0     | 1 |
| 2518 | CRYBA4   | ENST00000354760 | p.G147V  | c.440       | 0.116949094 | 3.233 | 1 |
| 2518 | CRYBA4   | ENST00000354760 | p.D167N  | c.499       | 0.154951191 | 3.328 | 1 |
| 2519 | BAG5     | ENST00000337322 | p.E350K  | c.1048      | 0.014298425 | 6.128 | 1 |
| 2519 | BAG5     | ENST00000337322 | p.M327I  | c.981       | 0.014298425 | 0     | 1 |
| 2520 | PASK     | ENST00000358649 | p.K1031R | c.3092      | 0.097282455 | 3.478 | 1 |
| 2520 | PASK     | ENST00000358649 | p.K1045N | c.3135      | 0.009902442 | 6.658 | 1 |
| 2520 | PASK     | ENST00000358649 | p.E1052D | c.3156      | 0.095872317 | 3.574 | 1 |
| 2520 | PASK     | ENST00000358649 | p.F1076L | c.3228      | 0.183617938 | 0     | 1 |
| 2521 | TAF1L    | ENST00000242310 | p.R1584L | c.4751      | 0.060664654 | 0     | 1 |
| 2521 | TAF1L    | ENST00000242310 | p.I1623V | c.4867      | 0.060664654 | 4.043 | 1 |
| 2522 | PDE4C    | ENST00000594617 | p.Y381C  | c.1142      | 0.158891879 | 5.418 | 1 |
| 2522 | PDE4C    | ENST00000594617 | p.D429N  | c.1285      | 0.115419322 | 8.599 | 1 |
| 2522 | PDE4C    | ENST00000594617 | p.H432N  | c.1294      | 1.105133013 | 0     | 1 |
| 2522 | PDE4C    | ENST00000594617 | p.H432Y  | c.1294      | 1.105133013 | 0     | 1 |
| 2522 | PDE4C    | ENST00000594617 | p.L457P  | c.1370      | 0.160180897 | 3.659 | 1 |
| 2523 | LRP6     | ENST00000261349 | p.R449M  | c.1346_1345 | 0.065587338 | 4.103 | 1 |
| 2523 | LRP6     | ENST00000261349 | p.W465C  | c.1395      | 0.11099135  | 3.711 | 1 |
| 2523 | LRP6     | ENST00000261349 | p.A509V  | c.1526      | 0.083831099 | 4.302 | 1 |
| 2523 | LRP6     | ENST00000261349 | p.H534N  | c.1600      | 0.185250942 | 0     | 1 |
| 2524 | THRB     | ENST00000280696 | p.D382N  | c.1144      | 0.0575153   | 5.227 | 1 |
| 2524 | THRB     | ENST00000280696 | p.R398H  | c.1193      | 0.312327773 | 2.698 | 1 |
| 2524 | THRB     | ENST00000280696 | p.R444L  | c.1331      | 1.180806845 | 0     | 2 |
| 2525 | MAPK8    | ENST00000374189 | p.E239Q  | c.715       | 0.093040328 | 0     | 1 |
| 2525 | MAPK8    | ENST00000374189 | p.Y266N  | c.796       | 0.093040328 | 3.426 | 1 |
| 2526 | SERPING1 | ENST00000403558 | p.V489E  | c.1466      | 0.094836652 | 3.554 | 1 |
| 2526 | SERPING1 | ENST00000403558 | p.G251V  | c.752       | 0.095262491 | 3.547 | 1 |
| 2526 | SERPING1 | ENST00000403558 | p.S254L  | c.761       | 0.033154924 | 5.142 | 1 |
| 2526 | SERPING1 | ENST00000403558 | p.Y328C  | c.983       | 0.199017051 | 0     | 1 |
| 2527 | CLEC4C   | ENST00000542353 | p.T85N   | c.254       | 0.008344044 | 8.49  | 1 |
| 2527 | CLEC4C   | ENST00000542353 | p.F96L   | c.288       | 0.051272987 | 6.039 | 1 |
| 2527 | CLEC4C   | ENST00000542353 | p.M208I  | c.624       | 2.01798962  | 0     | 3 |
| 2528 | CFB      | ENST00000556679 | p.F611L  | c.1833      | 0.020446532 | 6.612 | 1 |

|      |        |                 |          |             |             |       |   |
|------|--------|-----------------|----------|-------------|-------------|-------|---|
| 2528 | CFB    | ENST00000556679 | p.R640M  | c.1918_1919 | 1.049532172 | 0     | 1 |
| 2528 | CFB    | ENST00000556679 | p.R640Q  | c.1919      | 1.049532172 | 0     | 1 |
| 2528 | CFB    | ENST00000556679 | p.E1122K | c.3364      | 0.097333872 | 4.669 | 1 |
| 2529 | APP    | ENST00000346798 | p.R499C  | c.1495      | 0.057503663 | 5.558 | 1 |
| 2529 | APP    | ENST00000346798 | p.E564K  | c.1690      | 1.021226348 | 0     | 1 |
| 2529 | APP    | ENST00000346798 | p.E564Q  | c.1690      | 1.021226348 | 0     | 1 |
| 2530 | PCK1   | ENST00000319441 | p.A495T  | c.1483      | 0.093560935 | 0     | 1 |
| 2530 | PCK1   | ENST00000319441 | p.P605H  | c.1814      | 0.078979983 | 3.685 | 1 |
| 2530 | PCK1   | ENST00000319441 | p.E607K  | c.1819      | 0.017039461 | 5.983 | 1 |
| 2531 | PGD    | ENST00000270776 | p.S441G  | c.1321      | 0.011630041 | 0     | 1 |
| 2531 | PGD    | ENST00000270776 | p.K253N  | c.759       | 0.011630041 | 6.426 | 1 |
| 2532 | KDR    | ENST00000263923 | p.N156D  | c.466       | 0.008869079 | 6.817 | 1 |
| 2532 | KDR    | ENST00000263923 | p.K203T  | c.608       | 0.008869079 | 0     | 1 |
| 2533 | SH3GL2 | ENST00000380607 | p.F110V  | c.328       | 1.016311124 | 0     | 1 |
| 2533 | SH3GL2 | ENST00000380607 | p.F110S  | c.329       | 1.016311124 | 0     | 1 |
| 2533 | SH3GL2 | ENST00000380607 | p.S213N  | c.638       | 0.037973158 | 5.938 | 1 |
| 2534 | CAD    | ENST00000264705 | p.E1708D | c.5124      | 0.057471878 | 0     | 1 |
| 2534 | CAD    | ENST00000264705 | p.W1758C | c.5274      | 0.057471878 | 4.121 | 1 |
| 2535 | PDE2A  | ENST00000334456 | p.F603L  | c.1807      | 0.10892469  | 0     | 1 |
| 2535 | PDE2A  | ENST00000334456 | p.A881T  | c.2641      | 0.043010352 | 4.635 | 1 |
| 2535 | PDE2A  | ENST00000334456 | p.R887H  | c.2660      | 0.07144244  | 3.864 | 1 |
| 2536 | PLG    | ENST00000308192 | p.P350L  | c.1049      | 0.290918414 | 0     | 1 |
| 2536 | PLG    | ENST00000308192 | p.R284H  | c.851       | 0.051426721 | 4.603 | 1 |
| 2536 | PLG    | ENST00000308192 | p.V287L  | c.859       | 0.059229746 | 4.76  | 1 |
| 2536 | PLG    | ENST00000308192 | p.S292C  | c.875       | 0.229478479 | 2.232 | 1 |
| 2537 | NTRK3  | ENST00000360948 | p.A681T  | c.2041      | 0.008413956 | 7.893 | 1 |
| 2537 | NTRK3  | ENST00000360948 | p.R683S  | c.2049      | 0.097106806 | 6.965 | 1 |
| 2537 | NTRK3  | ENST00000360948 | p.R735C  | c.2203      | 1.032306601 | 0     | 1 |
| 2537 | NTRK3  | ENST00000360948 | p.R735H  | c.2204      | 1.032306601 | 0     | 1 |
| 2537 | NTRK3  | ENST00000360948 | p.Q773K  | c.2317      | 0.040190546 | 5.637 | 1 |
| 2538 | PFN2   | ENST00000498307 | p.G55R   | c.163       | 0.071644512 | 0     | 1 |
| 2538 | PFN2   | ENST00000498307 | p.A79T   | c.235       | 0.071644512 | 3.803 | 1 |
| 2539 | FOXP3  | ENST00000557224 | p.R442W  | c.1324      | 0.020474897 | 0     | 1 |
| 2539 | FOXP3  | ENST00000557224 | p.R312H  | c.935       | 0.020474897 | 5.61  | 1 |
| 2540 | ME2    | ENST00000321341 | p.R67Q   | c.200       | 0.024484287 | 5.352 | 1 |
| 2540 | ME2    | ENST00000321341 | p.R91T   | c.272       | 0.024484287 | 0     | 1 |
| 2541 | OCRL   | ENST00000371113 | p.P99H   | c.296       | 0.153042049 | 0     | 1 |
| 2541 | OCRL   | ENST00000371113 | p.G17D   | c.50        | 0.153042049 | 2.708 | 1 |
| 2542 | C8B    | ENST00000371237 | p.G352V  | c.1055      | 0.163020805 | 2.817 | 1 |
| 2542 | C8B    | ENST00000371237 | p.V427G  | c.1280      | 0.017069149 | 9.419 | 1 |
| 2542 | C8B    | ENST00000371237 | p.R428Q  | c.1283      | 0.224845029 | 0     | 1 |
| 2542 | C8B    | ENST00000371237 | p.L266F  | c.796       | 0.08707745  | 3.713 | 1 |
| 2542 | C8B    | ENST00000371237 | p.R274Q  | c.821       | 0.010536607 | 7.581 | 1 |
| 2544 | RLBP1  | ENST00000268125 | p.E192V  | c.575       | 0.158548925 | 2.657 | 1 |
| 2544 | RLBP1  | ENST00000268125 | p.G31R   | c.91        | 0.158548925 | 0     | 1 |
| 2545 | C3     | ENST00000245907 | p.I355N  | c.1064      | 0.079580926 | 0     | 1 |
| 2545 | C3     | ENST00000245907 | p.V376L  | c.1126      | 0.069588851 | 3.845 | 1 |
| 2545 | C3     | ENST00000245907 | p.P388A  | c.1162      | 0.009992075 | 6.645 | 1 |
| 2546 | CUL4A  | ENST00000375440 | p.V413M  | c.1237      | 0.013668512 | 7.193 | 1 |

|              |                 |          |           |             |       |   |
|--------------|-----------------|----------|-----------|-------------|-------|---|
| 2546 CUL4A   | ENST00000375440 | p.D456H  | c.1366    | 1.006834256 | 0     | 1 |
| 2546 CUL4A   | ENST00000375440 | p.D456N  | c.1366    | 1.006834256 | 0     | 1 |
| 2547 GGH     | ENST00000260118 | p.Y55C   | c.164     | 0.04497808  | 0     | 1 |
| 2547 GGH     | ENST00000260118 | p.G97R   | c.289     | 0.03711124  | 4.752 | 1 |
| 2547 GGH     | ENST00000260118 | p.S310L  | c.929     | 0.00786684  | 6.99  | 1 |
| 2548 PRKCH   | ENST00000332981 | p.F435S  | c.1304    | 0.030691862 | 0     | 1 |
| 2548 PRKCH   | ENST00000332981 | p.E639K  | c.1915    | 0.030691862 | 5.026 | 1 |
| 2549 CFH     | ENST00000367429 | p.P869S  | c.2605    | 0.03565877  | 0     | 1 |
| 2549 CFH     | ENST00000367429 | p.G894E  | c.2681    | 0.016153605 | 5.952 | 1 |
| 2549 CFH     | ENST00000367429 | p.T895I  | c.2684    | 0.019505165 | 5.68  | 1 |
| 2550 POLD2   | ENST00000452185 | p.S345T  | c.1033    | 0.142003658 | 2.816 | 1 |
| 2550 POLD2   | ENST00000452185 | p.P296T  | c.886     | 0.148527782 | 0     | 1 |
| 2550 POLD2   | ENST00000452185 | p.Y332C  | c.995     | 0.010633116 | 7.26  | 1 |
| 2551 VWF     | ENST00000261405 | p.D1513N | c.4537    | 0.04189347  | 5.077 | 1 |
| 2551 VWF     | ENST00000261405 | p.V1607I | c.4819    | 0.089160836 | 3.701 | 1 |
| 2551 VWF     | ENST00000261405 | p.L1657P | c.4970    | 0.106519052 | 0     | 1 |
| 2552 LRRC4   | ENST00000249363 | p.S164C  | c.491     | 0.120782637 | 0     | 1 |
| 2552 LRRC4   | ENST00000249363 | p.A166T  | c.496     | 0.077564215 | 9.705 | 1 |
| 2552 LRRC4   | ENST00000249363 | p.S188C  | c.563     | 0.110644723 | 3.287 | 1 |
| 2552 LRRC4   | ENST00000249363 | p.E193D  | c.579     | 0.088816631 | 5.867 | 1 |
| 2553 SULT1E1 | ENST00000226444 | p.A135T  | c.403     | 0.028478165 | 0     | 1 |
| 2553 SULT1E1 | ENST00000226444 | p.F275C  | c.824     | 0.028478165 | 5.134 | 1 |
| 2554 KLHL11  | ENST00000319121 | p.C205G  | c.613     | 0.006838995 | 0     | 1 |
| 2554 KLHL11  | ENST00000319121 | p.D226H  | c.676     | 0.006838995 | 7.192 | 1 |
| 2555 APBA1   | ENST00000265381 | p.S762N  | c.2285    | 0.061298688 | 4.028 | 1 |
| 2555 APBA1   | ENST00000265381 | p.V805I  | c.2413    | 0.061298688 | 0     | 1 |
| 2556 GSK3B   | ENST00000316626 | p.R96Q   | c.287     | 0.236051056 | 3.21  | 1 |
| 2556 GSK3B   | ENST00000316626 | p.H179N  | c.535     | 0.032189475 | 9.121 | 1 |
| 2556 GSK3B   | ENST00000316626 | p.R180Q  | c.540_539 | 1.204726853 | 0     | 2 |
| 2556 GSK3B   | ENST00000316626 | p.I238T  | c.713     | 0.218911442 | 3.398 | 1 |
| 2557 NTRK3   | ENST00000360948 | p.G652V  | c.1955    | 0.00755161  | 7.049 | 1 |
| 2557 NTRK3   | ENST00000360948 | p.E810K  | c.2428    | 0.00553961  | 7.496 | 1 |
| 2557 NTRK3   | ENST00000360948 | p.P832S  | c.2494    | 0.01309122  | 0     | 1 |
| 2558 CRYGC   | ENST00000282141 | p.R122H  | c.365     | 0.099511012 | 3.329 | 1 |
| 2558 CRYGC   | ENST00000282141 | p.E150K  | c.448     | 0.099511012 | 0     | 1 |
| 2559 PTPN4   | ENST00000263708 | p.K682E  | c.2044    | 0.049002528 | 0     | 1 |
| 2559 PTPN4   | ENST00000263708 | p.D736N  | c.2206    | 0.049002528 | 4.351 | 1 |
| 2560 PADI4   | ENST00000375448 | p.R441W  | c.1321    | 0.008850655 | 0     | 1 |
| 2560 PADI4   | ENST00000375448 | p.E474K  | c.1420    | 0.008850655 | 6.82  | 1 |
| 2561 SPTB    | ENST00000556626 | p.E1708Q | c.5122    | 0.008869079 | 0     | 1 |
| 2561 SPTB    | ENST00000556626 | p.M1778I | c.5334    | 0.008869079 | 6.817 | 1 |
| 2562 JAK3    | ENST00000458235 | p.S1012R | c.3036    | 0.02970281  | 0     | 1 |
| 2562 JAK3    | ENST00000458235 | p.C1077F | c.3230    | 0.01945116  | 5.684 | 1 |
| 2562 JAK3    | ENST00000458235 | p.R1085Q | c.3254    | 0.01025165  | 6.608 | 1 |
| 2563 FGA     | ENST00000302053 | p.E702K  | c.2104    | 1.176165094 | 0     | 2 |
| 2563 FGA     | ENST00000302053 | p.R830M  | c.2489    | 0.352330189 | 2.505 | 1 |
| 2564 FN1     | ENST00000354785 | p.Q1832K | c.5494    | 0.101250434 | 0     | 1 |
| 2564 FN1     | ENST00000354785 | p.V1868M | c.5602    | 0.101250434 | 3.304 | 1 |
| 2565 RYR2    | ENST00000360064 | p.G228C  | c.682     | 0.101884042 | 0     | 1 |



|               |                 |          |        |             |       |   |
|---------------|-----------------|----------|--------|-------------|-------|---|
| 2565 RYR2     | ENST00000360064 | p.G284V  | c.851  | 0.101884042 | 3.295 | 1 |
| 2566 ASMTL    | ENST00000381317 | p.R79Q   | c.236  | 0.006615198 | 7.24  | 1 |
| 2566 ASMTL    | ENST00000381317 | p.S131F  | c.392  | 0.006615198 | 0     | 1 |
| 2567 ATXN3L   | ENST00000380622 | p.F12L   | c.34   | 0.022074516 | 0     | 1 |
| 2567 ATXN3L   | ENST00000380622 | p.H119D  | c.355  | 0.009938165 | 6.847 | 1 |
| 2567 ATXN3L   | ENST00000380622 | p.W120L  | c.359  | 0.008844523 | 6.821 | 1 |
| 2567 ATXN3L   | ENST00000380622 | p.S135F  | c.404  | 0.004543438 | 7.782 | 1 |
| 2568 INPPL1   | ENST00000541756 | p.R244C  | c.730  | 2.054221168 | 0     | 3 |
| 2568 INPPL1   | ENST00000541756 | p.L271M  | c.811  | 0.162663504 | 4.205 | 1 |
| 2569 CDC7     | ENST00000428239 | p.P372L  | c.1115 | 0.058720172 | 0     | 1 |
| 2569 CDC7     | ENST00000428239 | p.R100I  | c.299  | 0.058720172 | 4.09  | 1 |
| 2570 SNX33    | ENST00000308527 | p.R537C  | c.1609 | 0.003467232 | 8.172 | 1 |
| 2570 SNX33    | ENST00000308527 | p.R266H  | c.797  | 0.002016403 | 8.954 | 1 |
| 2570 SNX33    | ENST00000308527 | p.F270V  | c.808  | 0.079604842 | 3.651 | 1 |
| 2570 SNX33    | ENST00000308527 | p.W313L  | c.938  | 0.085088477 | 0     | 1 |
| 2571 PNLIPRP1 | ENST00000358834 | p.E443Q  | c.1327 | 0.367875911 | 2.496 | 1 |
| 2571 PNLIPRP1 | ENST00000358834 | p.D296N  | c.886  | 1.179632413 | 0     | 2 |
| 2571 PNLIPRP1 | ENST00000358834 | p.P323L  | c.968  | 0.018070719 | 8.724 | 1 |
| 2572 UBA3     | ENST00000361055 | p.E204A  | c.611  | 0.110414381 | 4.179 | 1 |
| 2572 UBA3     | ENST00000361055 | p.P229T  | c.685  | 1.055207191 | 0     | 1 |
| 2572 UBA3     | ENST00000361055 | p.P229L  | c.686  | 1.055207191 | 0     | 1 |
| 2574 IFNA13   | ENST00000449498 | p.C53S   | c.157  | 0.044550978 | 0     | 1 |
| 2574 IFNA1    | ENST00000276927 | p.S160N  | c.479  | 0.006210822 | 7.331 | 1 |
| 2574 IFNA13   | ENST00000449498 | p.E166D  | c.498  | 0.038340156 | 4.705 | 1 |
| 2575 PPP1CA   | ENST00000312989 | p.E137D  | c.411  | 0.021021363 | 0     | 1 |
| 2575 PPP1CA   | ENST00000312989 | p.D205N  | c.613  | 0.021021363 | 5.572 | 1 |
| 2576 SCN5A    | ENST00000333535 | p.I1809V | c.5425 | 0.379566529 | 2.463 | 1 |
| 2576 SCN5A    | ENST00000333535 | p.S1812L | c.5435 | 0.059288342 | 5.63  | 1 |
| 2576 SCN5A    | ENST00000333535 | p.M1842I | c.5526 | 0.042734915 | 8.93  | 1 |
| 2576 SCN5A    | ENST00000333535 | p.R1847H | c.5540 | 1.213878139 | 0     | 2 |
| 2576 SCN5A    | ENST00000333535 | p.S1888F | c.5663 | 0.022393655 | 6.606 | 1 |
| 2577 FSHR     | ENST00000406846 | p.P45Q   | c.134  | 0.017064694 | 7.225 | 1 |
| 2577 FSHR     | ENST00000406846 | p.N47Y   | c.139  | 0.122007998 | 3.372 | 1 |
| 2577 FSHR     | ENST00000406846 | p.E50K   | c.148  | 0.02722857  | 5.475 | 1 |
| 2577 FSHR     | ENST00000406846 | p.G68E   | c.203  | 0.02374924  | 9.73  | 1 |
| 2577 FSHR     | ENST00000406846 | p.D71G   | c.212  | 0.24140075  | 0     | 1 |
| 2577 FSHR     | ENST00000406846 | p.K96N   | c.288  | 0.128096509 | 3.127 | 1 |
| 2578 PGK1     | ENST00000373316 | p.V217F  | c.649  | 0.011990204 | 0     | 1 |
| 2578 PGK1     | ENST00000373316 | p.F242S  | c.725  | 0.011990204 | 6.382 | 1 |
| 2579 KAL1     | ENST00000262648 | p.L200M  | c.598  | 0.009538645 | 6.712 | 1 |
| 2579 KAL1     | ENST00000262648 | p.T251S  | c.751  | 0.009538645 | 0     | 1 |
| 2580 OXSM     | ENST00000280701 | p.A389V  | c.1166 | 0.090644209 | 4.969 | 1 |
| 2580 OXSM     | ENST00000280701 | p.G391W  | c.1171 | 0.079679001 | 3.695 | 1 |
| 2580 OXSM     | ENST00000280701 | p.G212R  | c.634  | 0.110938414 | 0     | 1 |
| 2580 OXSM     | ENST00000280701 | p.D237N  | c.709  | 0.058046117 | 9.121 | 1 |
| 2581 GMPR     | ENST00000259727 | p.R39Q   | c.116  | 0.010957025 | 0     | 1 |
| 2581 GMPR     | ENST00000259727 | p.R146P  | c.437  | 0.010957025 | 6.512 | 1 |
| 2582 PLA2G7   | ENST00000274793 | p.L111I  | c.331  | 0.016989959 | 6.047 | 1 |
| 2582 PLA2G7   | ENST00000274793 | p.H151Y  | c.451  | 0.109949671 | 5.659 | 1 |

|               |                 |                         |             |             |       |   |
|---------------|-----------------|-------------------------|-------------|-------------|-------|---|
| 2582 PLA2G7   | ENST00000274793 | p.F156L                 | c.468       | 0.127671883 | 3.019 | 1 |
| 2582 PLA2G7   | ENST00000274793 | p.S185P                 | c.553       | 0.160015922 | 0     | 1 |
| 2582 PLA2G7   | ENST00000274793 | p.G275S                 | c.823       | 0.089453004 | 9.17  | 1 |
| 2583 IDE      | ENST00000265986 | p.W355C                 | c.1065      | 0.019681718 | 5.667 | 1 |
| 2583 IDE      | ENST00000265986 | p.E381K                 | c.1141      | 0.019681718 | 0     | 1 |
| 2584 P2RY13   | ENST00000325602 | p.S120L                 | c.359       | 0.072745408 | 0     | 1 |
| 2584 P2RY13   | ENST00000325602 | p.Y236C                 | c.707       | 0.072745408 | 3.781 | 1 |
| 2585 ACHE     | ENST00000411582 | p.A458T                 | c.1372      | 0.010919117 | 6.517 | 1 |
| 2585 ACHE     | ENST00000411582 | p.R552W                 | c.1654      | 0.010919117 | 0     | 1 |
| 2586 FOLH1    | ENST00000256999 | p.Q340R                 | c.1019      | 0.072192862 | 3.792 | 1 |
| 2586 FOLH1    | ENST00000256999 | p.D173N                 | c.517       | 0.072192862 | 0     | 1 |
| 2587 MET      | ENST00000318493 | p.A361in_frame_del      | c.1081_1083 | 0.136117973 | 6.203 | 1 |
| 2587 MET      | ENST00000318493 | p.L429V                 | c.1285      | 0.358104846 | 3.005 | 1 |
| 2587 MET      | ENST00000318493 | p.R469Q                 | c.1406      | 1.138141629 | 0     | 2 |
| 2588 ACPP     | ENST00000351273 | p.C372F                 | c.1115      | 0.226251616 | 3.144 | 1 |
| 2588 ACPP     | ENST00000351273 | p.P162S                 | c.484       | 1.113125808 | 0     | 1 |
| 2588 ACPP     | ENST00000351273 | p.P162H                 | c.485       | 1.113125808 | 0     | 1 |
| 2589 PNPT1    | ENST00000447944 | p.F620C                 | c.1859      | 0.020664881 | 0     | 1 |
| 2589 PNPT1    | ENST00000447944 | p.T646M                 | c.1937      | 0.007796271 | 7.003 | 1 |
| 2589 PNPT1    | ENST00000447944 | p.V649I                 | c.1945      | 0.01286861  | 6.28  | 1 |
| 2590 CRAT     | ENST00000318080 | p.P387S                 | c.1159      | 0.116952937 | 3.096 | 1 |
| 2590 CRAT     | ENST00000318080 | p.V569M                 | c.1705      | 0.116952937 | 0     | 1 |
| 2591 PTGR1    | ENST00000309195 | p.K11Q                  | c.31        | 0.059912465 | 0     | 1 |
| 2591 PTGR1    | ENST00000309195 | p.D320Y                 | c.958       | 0.059912465 | 4.061 | 1 |
| 2592 SERPINI1 | ENST00000446050 | p.L81Q                  | c.242       | 0.111952322 | 0     | 1 |
| 2592 SERPINI1 | ENST00000446050 | p.P22S                  | c.64        | 0.104748392 | 3.255 | 1 |
| 2592 SERPINI1 | ENST00000446050 | p.T323K                 | c.968       | 0.01544473  | 7.117 | 1 |
| 2593 ITGA5    | ENST00000293379 | p.M351I                 | c.1053      | 0.004385631 | 7.833 | 1 |
| 2593 ITGA5    | ENST00000293379 | p.P359S                 | c.1075      | 0.006015915 | 7.377 | 1 |
| 2593 ITGA5    | ENST00000293379 | p.F389C                 | c.1166      | 0.010401546 | 0     | 1 |
| 2594 TBX1     | ENST00000332710 | p.L158M                 | c.472       | 0.101027676 | 0     | 1 |
| 2594 TBX1     | ENST00000332710 | p.P197L                 | c.590       | 0.015255511 | 6.15  | 1 |
| 2594 TBX1     | ENST00000332710 | p.R240H                 | c.719       | 0.00361447  | 8.112 | 1 |
| 2594 TBX1     | ENST00000332710 | p.F241S                 | c.722       | 0.08450464  | 3.585 | 1 |
| 2596 CGB7     | ENST00000377280 | p.V49A                  | c.146       | 0.0108738   | 0     | 1 |
| 2596 CGB5     | ENST00000301408 | p.A103T                 | c.307       | 0.0108738   | 6.523 | 1 |
| 2597 CAMK2B   | ENST00000395749 | p.Q118H                 | c.354       | 0.116394035 | 3.117 | 1 |
| 2597 CAMK2B   | ENST00000395749 | p.QILEA119in_frame_delH | c.368_357   | 0.027449221 | 6.671 | 1 |
| 2597 CAMK2B   | ENST00000395749 | p.R275H                 | c.824       | 0.125076502 | 0     | 1 |
| 2598 ITGAV    | ENST00000261023 | p.V347L                 | c.1039      | 0.073048578 | 3.775 | 1 |
| 2598 ITGAV    | ENST00000261023 | p.L413M                 | c.1237      | 0.073048578 | 0     | 1 |
| 2599 ALOX12   | ENST00000251535 | p.R66C                  | c.196       | 0.046843738 | 4.416 | 1 |
| 2599 ALOX12   | ENST00000251535 | p.E103D                 | c.309       | 0.046843738 | 0     | 1 |
| 2600 MTOR     | ENST00000361445 | p.R1709C                | c.5125      | 1.021777769 | 0     | 1 |
| 2600 MTOR     | ENST00000361445 | p.R1709H                | c.5126      | 1.021777769 | 0     | 1 |
| 2600 MTOR     | ENST00000361445 | p.R2266P                | c.6797      | 0.043555539 | 5.521 | 1 |
| 2601 CYP2C8   | ENST00000371270 | p.F168I                 | c.502       | 0.141340319 | 0     | 1 |
| 2601 CYP2C8   | ENST00000371270 | p.L195V                 | c.583       | 0.087827931 | 3.591 | 1 |
| 2601 CYP2C8   | ENST00000371270 | p.K199I                 | c.596       | 0.063197605 | 4.099 | 1 |

|      |         |                 |                      |         |             |       |   |
|------|---------|-----------------|----------------------|---------|-------------|-------|---|
| 2602 | TAS2R39 | ENST00000446620 | p.W126L              | c.377   | 0.245325302 | 4.967 | 1 |
| 2602 | TAS2R39 | ENST00000446620 | p.F212L              | c.636   | 0.146840601 | 9.205 | 1 |
| 2602 | TAS2R39 | ENST00000446620 | p.G216R              | c.646   | 0.110681465 | 8.337 | 1 |
| 2602 | TAS2R39 | ENST00000446620 | p.Y303S              | c.908   | 1.03675998  | 0     | 2 |
| 2603 | FABP4   | ENST00000256104 | p.V119I              | c.355   | 0.084964265 | 0     | 1 |
| 2603 | FABP4   | ENST00000256104 | p.DYMK19in_frame_del | c.68_57 | 0.084964265 | 3.557 | 1 |
| 2604 | ITGB6   | ENST00000283249 | p.A143T              | c.427   | 0.142545661 | 3.061 | 1 |
| 2604 | ITGB6   | ENST00000283249 | p.S144F              | c.431   | 0.033802487 | 5.05  | 1 |
| 2604 | ITGB6   | ENST00000283249 | p.C197Y              | c.590   | 0.032630888 | 6.208 | 1 |
| 2604 | ITGB6   | ENST00000283249 | p.I232M              | c.696   | 0.163537574 | 0     | 1 |
| 2605 | SH3GL2  | ENST00000380607 | p.D107N              | c.319   | 0.006601456 | 7.243 | 1 |
| 2605 | SH3GL2  | ENST00000380607 | p.D169N              | c.505   | 0.123554393 | 0     | 1 |
| 2605 | SH3GL2  | ENST00000380607 | p.G26E               | c.77    | 0.116952937 | 3.096 | 1 |
| 2606 | TPK1    | ENST00000360057 | p.G130W              | c.388   | 0.055062608 | 7.767 | 1 |
| 2606 | TPK1    | ENST00000360057 | p.D133N              | c.397   | 0.217747357 | 4.838 | 1 |
| 2606 | TPK1    | ENST00000360057 | p.E159K              | c.475   | 0.350624726 | 3.212 | 1 |
| 2606 | TPK1    | ENST00000360057 | p.W182L              | c.545   | 0.772805474 | 1.925 | 1 |
| 2606 | TPK1    | ENST00000360057 | p.A240T              | c.718   | 1.410812286 | 0     | 2 |
| 2607 | STAMBP  | ENST00000394070 | p.R424Q              | c.1271  | 1.004677651 | 0     | 2 |
| 2607 | STAMBP  | ENST00000394070 | p.L300I              | c.898   | 0.027859546 | 7.74  | 1 |
| 2608 | STEAP3  | ENST00000409811 | p.I149S              | c.446   | 0.255784367 | 2.967 | 1 |
| 2608 | STEAP3  | ENST00000409811 | p.R207C              | c.619   | 1.127892184 | 0     | 1 |
| 2608 | STEAP3  | ENST00000409811 | p.R207H              | c.620   | 1.127892184 | 0     | 1 |
| 2609 | CETP    | ENST00000200676 | p.A51S               | c.151   | 0.055552668 | 4.17  | 1 |
| 2609 | CETP    | ENST00000200676 | p.I200M              | c.600   | 0.055552668 | 0     | 1 |
| 2610 | THEM5   | ENST00000368817 | p.L69M               | c.205   | 0.022671128 | 5.463 | 1 |
| 2610 | THEM5   | ENST00000368817 | p.F132L              | c.394   | 0.022671128 | 0     | 1 |
| 2611 | CYP11A1 | ENST00000268053 | p.A343V              | c.1028  | 0.078753966 | 3.818 | 1 |
| 2611 | CYP11A1 | ENST00000268053 | p.E486K              | c.1456  | 0.181624408 | 0     | 1 |
| 2611 | CYP11A1 | ENST00000268053 | p.W512C              | c.1536  | 0.118571438 | 3.175 | 1 |
| 2612 | NGF     | ENST00000369512 | p.E132K              | c.394   | 1.005859527 | 0     | 2 |
| 2612 | NGF     | ENST00000369512 | p.R190G              | c.568   | 0.011719055 | 7.415 | 1 |
| 2613 | PFKFB1  | ENST00000375006 | p.C334F              | c.1001  | 0.014788491 | 7.061 | 1 |
| 2613 | PFKFB1  | ENST00000375006 | p.G272A              | c.815   | 0.022676261 | 0     | 1 |
| 2613 | PFKFB1  | ENST00000375006 | p.E328K              | c.982   | 0.015187203 | 6.041 | 1 |
| 2614 | NTRK1   | ENST00000524377 | p.R654H              | c.1961  | 0.156293085 | 2.873 | 1 |
| 2614 | NTRK1   | ENST00000524377 | p.D679N              | c.2035  | 0.15755216  | 0     | 1 |
| 2614 | NTRK1   | ENST00000524377 | p.R692C              | c.2074  | 0.143374443 | 8.756 | 1 |
| 2614 | NTRK1   | ENST00000524377 | p.P727H              | c.2180  | 0.154399153 | 5.738 | 1 |
| 2615 | CHRNA4  | ENST00000370263 | p.E92K               | c.274   | 0.042541111 | 0     | 1 |
| 2615 | CHRNA4  | ENST00000370263 | p.W151L              | c.452   | 0.027374947 | 5.191 | 1 |
| 2615 | CHRNA4  | ENST00000370263 | p.M194V              | c.580   | 0.015166164 | 6.043 | 1 |
| 2616 | RBBP7   | ENST00000380084 | p.E167K              | c.499   | 1.008543246 | 0     | 2 |
| 2616 | RBBP7   | ENST00000380084 | p.N211K              | c.633   | 0.017086492 | 6.871 | 1 |
| 2617 | ACADSB  | ENST00000358776 | p.K189N              | c.567   | 0.012023494 | 6.378 | 1 |
| 2617 | ACADSB  | ENST00000358776 | p.A221V              | c.662   | 0.012023494 | 0     | 1 |
| 2618 | ETV1    | ENST00000405218 | p.P234S              | c.700   | 0.015679246 | 0     | 1 |
| 2618 | ETV1    | ENST00000405218 | p.S287C              | c.859   | 0.015679246 | 5.995 | 1 |
| 2619 | KRAS    | ENST00000256078 | p.P110S              | c.328   | 0.028424423 | 5.436 | 1 |

|               |                 |                       |             |             |       |   |
|---------------|-----------------|-----------------------|-------------|-------------|-------|---|
| 2619 KRAS     | ENST00000256078 | p.R135T               | c.404       | 0.23585079  | 2.117 | 1 |
| 2619 KRAS     | ENST00000256078 | p.R164Q               | c.491       | 0.253625192 | 0     | 1 |
| 2620 UBE2N    | ENST00000550657 | p.I75M                | c.225       | 0.007861389 | 6.991 | 1 |
| 2622 NDNL2    | ENST00000332303 | p.K88N                | c.264       | 0.060538637 | 0     | 1 |
| 2622 NDNL2    | ENST00000332303 | p.Y119C               | c.356       | 0.060538637 | 4.046 | 1 |
| 2623 TEAD2    | ENST00000598810 | p.V449A               | c.1346      | 0.187135744 | 0     | 1 |
| 2623 TEAD2    | ENST00000598810 | p.Y293C               | c.878       | 0.180350206 | 2.483 | 1 |
| 2623 TEAD2    | ENST00000598810 | p.L303P               | c.908       | 0.009741821 | 6.919 | 1 |
| 2624 SAMHD1   | ENST00000262878 | p.R451P               | c.1352      | 0.160971848 | 0     | 1 |
| 2624 SAMHD1   | ENST00000262878 | p.D137H               | c.409       | 0.135150558 | 3.371 | 1 |
| 2624 SAMHD1   | ENST00000262878 | p.R145Q               | c.434       | 0.067879078 | 4.014 | 1 |
| 2624 SAMHD1   | ENST00000262878 | p.N248D               | c.742       | 0.02745306  | 8.691 | 1 |
| 2625 SUMF2    | ENST00000342190 | p.G110E               | c.329       | 0.124222637 | 3.009 | 1 |
| 2625 SUMF2    | ENST00000342190 | p.K142N               | c.426       | 0.124222637 | 0     | 1 |
| 2626 ITGAV    | ENST00000261023 | p.R108T               | c.323       | 0.125695073 | 2.992 | 1 |
| 2626 ITGAV    | ENST00000261023 | p.E168D               | c.504       | 0.125695073 | 0     | 1 |
| 2627 PPFIA2   | ENST00000549396 | p.E960G               | c.2879      | 1.00367765  | 0     | 1 |
| 2627 PPFIA2   | ENST00000549396 | p.EMVS960in_frame_del | c.2889_2878 | 1.00367765  | 0     | 1 |
| 2627 PPFIA2   | ENST00000549396 | p.A1048T              | c.3142      | 0.007355301 | 8.087 | 1 |
| 2628 EXOSC7   | ENST00000265564 | p.E20K                | c.58        | 0.028975955 | 5.109 | 1 |
| 2628 EXOSC7   | ENST00000265564 | p.R209W               | c.625       | 0.030600216 | 0     | 1 |
| 2628 EXOSC7   | ENST00000265564 | p.R27C                | c.79        | 0.001624262 | 9.266 | 1 |
| 2629 AKR1D1   | ENST00000242375 | p.R78W                | c.232       | 0.136096467 | 4.525 | 1 |
| 2629 AKR1D1   | ENST00000242375 | p.R99C                | c.295       | 2.17677537  | 0     | 3 |
| 2629 AKR1D1   | ENST00000242375 | p.A156T               | c.466       | 0.135817667 | 4.528 | 1 |
| 2629 AKR1D1   | ENST00000242375 | p.L162F               | c.486       | 0.277796919 | 3.474 | 1 |
| 2630 XDH      | ENST00000379416 | p.D430Y               | c.1288      | 0.031141883 | 5.005 | 1 |
| 2630 XDH      | ENST00000379416 | p.G457N               | c.1370_1369 | 0.031141883 | 0     | 1 |
| 2631 PPCS     | ENST00000372561 | p.G170D               | c.509       | 0.085109487 | 3.688 | 1 |
| 2631 PPCS     | ENST00000372561 | p.A225S               | c.673       | 0.174513369 | 0     | 1 |
| 2631 PPCS     | ENST00000372561 | p.Q253E               | c.757       | 0.111013923 | 3.367 | 1 |
| 2632 F11      | ENST00000403665 | p.S394Y               | c.1181      | 0.181270932 | 3.475 | 1 |
| 2632 F11      | ENST00000403665 | p.R443C               | c.1327      | 1.105547522 | 0     | 1 |
| 2632 F11      | ENST00000403665 | p.R443H               | c.1328      | 1.105547522 | 0     | 1 |
| 2632 F11      | ENST00000403665 | p.V490A               | c.1469      | 0.032632582 | 6.001 | 1 |
| 2633 GNMT     | ENST00000372808 | p.A144T               | c.430       | 0.071655327 | 5.747 | 1 |
| 2633 GNMT     | ENST00000372808 | p.R242W               | c.724       | 1.01862004  | 0     | 1 |
| 2633 GNMT     | ENST00000372808 | p.R242Q               | c.725       | 1.01862004  | 0     | 1 |
| 2634 PIGR     | ENST00000356495 | p.R412H               | c.1235      | 0.045382906 | 0     | 1 |
| 2634 PIGR     | ENST00000356495 | p.D601N               | c.1801      | 0.034125642 | 4.873 | 1 |
| 2634 PIGR     | ENST00000356495 | p.Y172C               | c.515       | 0.011257264 | 6.473 | 1 |
| 2635 XCL1     | ENST00000367818 | p.I61T                | c.182       | 0.009169126 | 0     | 1 |
| 2635 XCL1     | ENST00000367818 | p.E25D                | c.75        | 0.009169126 | 6.769 | 1 |
| 2636 SMAD3    | ENST00000327367 | p.M255I               | c.765       | 0.106875272 | 0     | 1 |
| 2636 SMAD3    | ENST00000327367 | p.R295W               | c.883       | 0.106875272 | 3.226 | 1 |
| 2637 GCK      | ENST00000345378 | p.A371T               | c.1111      | 0.016968467 | 0     | 1 |
| 2637 GCK      | ENST00000345378 | p.E23Q                | c.67        | 0.016968467 | 5.881 | 1 |
| 2638 SUV420H1 | ENST00000304363 | p.D249N               | c.745       | 1.013926726 | 0     | 2 |
| 2638 SUV420H1 | ENST00000304363 | p.S283L               | c.848       | 0.027853453 | 6.166 | 1 |

|      |        |                 |          |        |             |       |   |
|------|--------|-----------------|----------|--------|-------------|-------|---|
| 2639 | ACACB  | ENST00000338432 | p.P2022H | c.6065 | 0.03941753  | 6.188 | 1 |
| 2639 | ACACB  | ENST00000338432 | p.R2086L | c.6257 | 0.059128603 | 4.08  | 1 |
| 2639 | ACACB  | ENST00000338432 | p.L2149M | c.6445 | 0.072844569 | 0     | 1 |
| 2640 | KSR2   | ENST00000339824 | p.H719N  | c.2155 | 0.015549371 | 0     | 1 |
| 2640 | KSR2   | ENST00000339824 | p.E769K  | c.2305 | 0.015549371 | 6.007 | 1 |
| 2642 | PDE1A  | ENST00000456212 | p.S359Y  | c.1076 | 0.078345814 | 0     | 1 |
| 2642 | PDE1A  | ENST00000456212 | p.S329Y  | c.986  | 0.078345814 | 3.674 | 1 |
| 2643 | PTPRE  | ENST00000419012 | p.T552M  | c.1655 | 0.009017855 | 0     | 1 |
| 2643 | PTPRE  | ENST00000419012 | p.R585Q  | c.1754 | 0.009017855 | 6.793 | 1 |
| 2644 | STAM   | ENST00000377524 | p.K78N   | c.234  | 0.006488047 | 0     | 1 |
| 2644 | STAM   | ENST00000377524 | p.E118G  | c.353  | 0.006488047 | 7.268 | 1 |
| 2645 | XPO1   | ENST00000404992 | p.Q916E  | c.2746 | 0.014568539 | 6.101 | 1 |
| 2645 | XPO1   | ENST00000404992 | p.N970S  | c.2909 | 0.014568539 | 0     | 1 |
| 2646 | CTSL   | ENST00000340342 | p.Q188K  | c.562  | 0.013640119 | 6.196 | 1 |
| 2646 | CTSL   | ENST00000340342 | p.F258L  | c.774  | 0.026042288 | 5.263 | 1 |
| 2646 | CTSL   | ENST00000340342 | p.G307S  | c.919  | 0.039682406 | 0     | 1 |
| 2647 | BTG2   | ENST00000475157 | p.R66G   | c.196  | 0.156583055 | 0     | 1 |
| 2647 | BTG2   | ENST00000475157 | p.V104M  | c.310  | 0.156583055 | 2.675 | 1 |
| 2649 | GABBR1 | ENST00000377034 | p.E460D  | c.1380 | 0.123792859 | 0     | 1 |
| 2649 | GABBR1 | ENST00000377034 | p.A191G  | c.572  | 0.123792859 | 3.014 | 1 |
| 2650 | FTMT   | ENST00000321339 | p.V93L   | c.277  | 0.022143084 | 5.497 | 1 |
| 2650 | FTMT   | ENST00000321339 | p.E149K  | c.445  | 0.022143084 | 0     | 1 |
| 2651 | RGS17  | ENST00000367225 | p.S150T  | c.449  | 0.074480161 | 3.747 | 1 |
| 2651 | RGS17  | ENST00000367225 | p.Q177H  | c.531  | 0.074480161 | 0     | 1 |
| 2652 | MAP2K4 | ENST00000415385 | p.D107V  | c.320  | 0.008099227 | 6.948 | 1 |
| 2652 | MAP2K4 | ENST00000415385 | p.P134Q  | c.401  | 0.008099227 | 0     | 1 |
| 2653 | KCNIP1 | ENST00000434108 | p.P83S   | c.247  | 0.052981474 | 0     | 1 |
| 2653 | KCNIP1 | ENST00000434108 | p.M183I  | c.549  | 0.04941182  | 4.339 | 1 |
| 2653 | KCNIP1 | ENST00000434108 | p.C224R  | c.670  | 0.003569654 | 8.13  | 1 |
| 2655 | KSR2   | ENST00000339824 | p.S749C  | c.2246 | 0.013093549 | 6.255 | 1 |
| 2655 | KSR2   | ENST00000339824 | p.E866K  | c.2596 | 0.013093549 | 0     | 1 |
| 2656 | PKP1   | ENST00000263946 | p.N356D  | c.1066 | 0.024080347 | 5.376 | 1 |
| 2656 | PKP1   | ENST00000263946 | p.R317M  | c.950  | 0.024080347 | 0     | 1 |
| 2657 | FKBP5  | ENST00000536438 | p.P199L  | c.596  | 0.088082547 | 0     | 1 |
| 2657 | FKBP5  | ENST00000536438 | p.G224D  | c.671  | 0.088082547 | 3.505 | 1 |
| 2658 | ANPEP  | ENST00000300060 | p.R363Q  | c.1088 | 0.130217929 | 2.941 | 1 |
| 2658 | ANPEP  | ENST00000300060 | p.D858E  | c.2574 | 0.130217929 | 0     | 1 |
| 2659 | DDX58  | ENST00000379883 | p.R767H  | c.2300 | 0.09182304  | 3.445 | 1 |
| 2659 | DDX58  | ENST00000379883 | p.V823I  | c.2467 | 0.09182304  | 0     | 1 |
| 2660 | SPTB   | ENST00000556626 | p.F2014L | c.6042 | 0.026700304 | 5.227 | 1 |
| 2660 | SPTB   | ENST00000556626 | p.K2070E | c.6208 | 0.026700304 | 0     | 1 |
| 2661 | VPS35  | ENST00000299138 | p.R499H  | c.1496 | 0.006877024 | 0     | 1 |
| 2661 | VPS35  | ENST00000299138 | p.R542Q  | c.1625 | 0.006877024 | 7.184 | 1 |
| 2662 | ERBB4  | ENST00000342788 | p.R103C  | c.307  | 1.053794963 | 0     | 1 |
| 2662 | ERBB4  | ENST00000342788 | p.R103L  | c.308  | 1.053794963 | 0     | 1 |
| 2662 | ERBB4  | ENST00000342788 | p.I166N  | c.497  | 0.033077637 | 5.918 | 1 |
| 2662 | ERBB4  | ENST00000342788 | p.A235V  | c.704  | 0.055514175 | 5.171 | 1 |
| 2662 | ERBB4  | ENST00000342788 | p.C238F  | c.713  | 0.018998114 | 6.718 | 1 |
| 2663 | PDE2A  | ENST00000334456 | p.P653T  | c.1957 | 0.086323473 | 0     | 1 |

|              |                 |          |           |             |       |   |
|--------------|-----------------|----------|-----------|-------------|-------|---|
| 2663 PDE2A   | ENST00000334456 | p.G702C  | c.2104    | 0.070982162 | 3.84  | 1 |
| 2663 PDE2A   | ENST00000334456 | p.T703R  | c.2108    | 0.017644742 | 5.922 | 1 |
| 2664 AKR1B10 | ENST00000359579 | p.G56E   | c.167     | 0.108067154 | 0     | 1 |
| 2664 AKR1B10 | ENST00000359579 | p.L100M  | c.298     | 0.108067154 | 3.21  | 1 |
| 2665 SMS     | ENST00000404933 | p.I181F  | c.541     | 0.093518334 | 0     | 1 |
| 2665 SMS     | ENST00000404933 | p.D276Y  | c.826     | 0.090298785 | 3.617 | 1 |
| 2665 SMS     | ENST00000404933 | p.Y312N  | c.934     | 0.020810777 | 6.379 | 1 |
| 2666 MAPK12  | ENST00000215659 | p.L283V  | c.847     | 0.09305809  | 0     | 1 |
| 2666 MAPK12  | ENST00000215659 | p.P309S  | c.925     | 0.081452042 | 3.636 | 1 |
| 2666 MAPK12  | ENST00000215659 | p.F311L  | c.933     | 0.029790082 | 6.308 | 1 |
| 2667 AURKA   | ENST00000395909 | p.H176Y  | c.526     | 0.060950065 | 4.173 | 1 |
| 2667 AURKA   | ENST00000395909 | p.V206A  | c.617     | 0.011864306 | 6.534 | 1 |
| 2667 AURKA   | ENST00000395909 | p.W277L  | c.830     | 0.165670536 | 0     | 1 |
| 2667 AURKA   | ENST00000395909 | p.M305I  | c.915     | 0.106027957 | 3.33  | 1 |
| 2668 GGT1    | ENST00000406383 | p.H81D   | c.241     | 0.153679858 | 2.702 | 1 |
| 2668 GGT1    | ENST00000406383 | p.A177V  | c.530     | 0.153679858 | 0     | 1 |
| 2669 TRA2B   | ENST00000453386 | p.G124L  | c.371_370 | 0.304391505 | 1.716 | 1 |
| 2669 TRA2B   | ENST00000453386 | p.F161S  | c.482     | 0.304391505 | 0     | 1 |
| 2670 PNLIP   | ENST00000369221 | p.F417L  | c.1249    | 0.258706609 | 0     | 1 |
| 2670 PNLIP   | ENST00000369221 | p.E457K  | c.1369    | 0.123024898 | 3.227 | 1 |
| 2670 PNLIP   | ENST00000369221 | p.L459M  | c.1375    | 0.104307465 | 3.487 | 1 |
| 2670 PNLIP   | ENST00000369221 | p.L460F  | c.1378    | 0.075008862 | 3.995 | 1 |
| 2671 C5      | ENST00000223642 | p.S940Y  | c.2819    | 0.058598194 | 4.093 | 1 |
| 2671 C5      | ENST00000223642 | p.T1363P | c.4087    | 0.058598194 | 0     | 1 |
| 2672 CLEC4C  | ENST00000542353 | p.G143R  | c.427     | 0.010061314 | 8.22  | 1 |
| 2672 CLEC4C  | ENST00000542353 | p.P147S  | c.439     | 0.09239525  | 5.021 | 1 |
| 2672 CLEC4C  | ENST00000542353 | p.G148W  | c.442     | 0.078181035 | 5.262 | 1 |
| 2672 CLEC4C  | ENST00000542353 | p.R179C  | c.535     | 2.060212533 | 0     | 1 |
| 2672 CLEC4C  | ENST00000542353 | p.R179L  | c.536     | 2.060212533 | 0     | 2 |
| 2673 LIMK1   | ENST00000418310 | p.H423Y  | c.1267    | 0.009813612 | 6.671 | 1 |
| 2673 LIMK1   | ENST00000418310 | p.A475T  | c.1423    | 0.009813612 | 0     | 1 |
| 2674 TEK     | ENST00000380036 | p.A933T  | c.2797    | 0.124488111 | 0     | 1 |
| 2674 TEK     | ENST00000380036 | p.T1106M | c.3317    | 0.049981211 | 4.431 | 1 |
| 2674 TEK     | ENST00000380036 | p.L1107F | c.3319    | 0.081750888 | 3.678 | 1 |
| 2675 IL4     | ENST00000231449 | p.E50K   | c.148     | 0.295522002 | 0     | 1 |
| 2675 IL4     | ENST00000231449 | p.R88C   | c.262     | 0.072577281 | 4.091 | 1 |
| 2675 IL4     | ENST00000231449 | p.T132M  | c.395     | 0.250740314 | 2.078 | 1 |
| 2676 PIAS3   | ENST00000393045 | p.A352T  | c.1054    | 1.003181717 | 0     | 1 |
| 2676 PIAS3   | ENST00000393045 | p.A352G  | c.1055    | 1.003181717 | 0     | 1 |
| 2676 PIAS3   | ENST00000393045 | p.I379V  | c.1135    | 0.002605905 | 9.584 | 1 |
| 2676 PIAS3   | ENST00000393045 | p.P166S  | c.496     | 0.008023234 | 9.056 | 1 |
| 2677 TEK     | ENST00000380036 | p.E990K  | c.2968    | 0.099580012 | 0     | 1 |
| 2677 TEK     | ENST00000380036 | p.V1014L | c.3040    | 0.099580012 | 3.328 | 1 |
| 2678 CYP19A1 | ENST00000559878 | p.G391E  | c.1172    | 0.043105029 | 4.536 | 1 |
| 2678 CYP19A1 | ENST00000559878 | p.E93K   | c.277     | 0.043105029 | 0     | 1 |
| 2679 FOXP2   | ENST00000408937 | p.R548K  | c.1643    | 0.036096431 | 4.792 | 1 |
| 2679 FOXP2   | ENST00000408937 | p.E602K  | c.1804    | 0.036096431 | 0     | 1 |
| 2680 ADAM22  | ENST00000315984 | p.R667S  | c.2001    | 0.021762679 | 6.522 | 1 |
| 2680 ADAM22  | ENST00000315984 | p.M313I  | c.939     | 1.01088134  | 0     | 2 |

|              |                 |          |        |             |       |   |
|--------------|-----------------|----------|--------|-------------|-------|---|
| 2681 C5      | ENST00000223642 | p.S1117Y | c.3350 | 0.113034365 | 0     | 1 |
| 2681 C5      | ENST00000223642 | p.F1174V | c.3520 | 0.103534891 | 3.287 | 1 |
| 2681 C5      | ENST00000223642 | p.L1175M | c.3523 | 0.011668104 | 6.562 | 1 |
| 2683 KIF3B   | ENST00000375712 | p.D154Y  | c.460  | 0.00573894  | 7.445 | 1 |
| 2683 KIF3B   | ENST00000375712 | p.R201C  | c.601  | 0.023674915 | 0     | 1 |
| 2683 KIF3B   | ENST00000375712 | p.D294Y  | c.880  | 0.017935975 | 5.801 | 1 |
| 2684 CHRNA4  | ENST00000370263 | p.N193S  | c.578  | 0.060655743 | 0     | 1 |
| 2684 CHRNA4  | ENST00000370263 | p.T217S  | c.650  | 0.047333322 | 4.401 | 1 |
| 2684 CHRNA4  | ENST00000370263 | p.T234A  | c.700  | 0.01332242  | 6.23  | 1 |
| 2685 UPF1    | ENST00000599848 | p.E766V  | c.2297 | 0.033984012 | 4.879 | 1 |
| 2685 UPF1    | ENST00000599848 | p.R843H  | c.2528 | 0.033984012 | 0     | 1 |
| 2686 HIBADH  | ENST00000265395 | p.A138T  | c.412  | 0.018249491 | 5.776 | 1 |
| 2686 HIBADH  | ENST00000265395 | p.S295N  | c.884  | 0.018249491 | 0     | 1 |
| 2687 TCN1    | ENST00000257264 | p.V336I  | c.1006 | 0.179374104 | 3.262 | 1 |
| 2687 TCN1    | ENST00000257264 | p.R421C  | c.1261 | 0.202458966 | 0     | 1 |
| 2687 TCN1    | ENST00000257264 | p.G423R  | c.1267 | 0.134600673 | 7.192 | 1 |
| 2687 TCN1    | ENST00000257264 | p.S332L  | c.995  | 0.163058406 | 3.452 | 1 |
| 2688 MYBPC1  | ENST00000452455 | p.L446P  | c.1337 | 0.135184345 | 0     | 1 |
| 2688 MYBPC1  | ENST00000452455 | p.P521T  | c.1561 | 0.135184345 | 2.887 | 1 |
| 2689 CLK1    | ENST00000434813 | p.P361L  | c.1082 | 0.061305432 | 4.21  | 1 |
| 2689 CLK1    | ENST00000434813 | p.F264V  | c.790  | 0.034568676 | 5.067 | 1 |
| 2689 CLK1    | ENST00000434813 | p.R265C  | c.793  | 0.113533166 | 3.255 | 1 |
| 2689 CLK1    | ENST00000434813 | p.Q313E  | c.937  | 0.188613875 | 0     | 1 |
| 2690 PDE10A  | ENST00000539869 | p.Y369N  | c.1105 | 0.037188491 | 0     | 1 |
| 2690 PDE10A  | ENST00000539869 | p.I332M  | c.996  | 0.037188491 | 4.749 | 1 |
| 2691 LYPLA1  | ENST00000316963 | p.N111K  | c.333  | 0.011849746 | 6.399 | 1 |
| 2691 LYPLA1  | ENST00000316963 | p.G116R  | c.346  | 0.020545981 | 5.605 | 1 |
| 2691 LYPLA1  | ENST00000316963 | p.G138S  | c.412  | 0.032395727 | 0     | 1 |
| 2692 RRP9    | ENST00000232888 | p.C151W  | c.453  | 0.067125279 | 0     | 1 |
| 2692 RRP9    | ENST00000232888 | p.V202I  | c.604  | 0.067125279 | 3.897 | 1 |
| 2693 GLB1    | ENST00000445488 | p.C569Y  | c.1706 | 0.014608987 | 6.097 | 1 |
| 2693 GLB1    | ENST00000445488 | p.W630C  | c.1890 | 0.014608987 | 0     | 1 |
| 2694 PTPRC   | ENST00000442510 | p.E624K  | c.1870 | 0.073523182 | 0     | 1 |
| 2694 PTPRC   | ENST00000442510 | p.F664L  | c.1990 | 0.056995823 | 4.133 | 1 |
| 2694 PTPRC   | ENST00000442510 | p.S665I  | c.1994 | 0.016527359 | 5.919 | 1 |
| 2695 MGAM    | ENST00000475668 | p.E419K  | c.1255 | 1.015145153 | 0     | 1 |
| 2695 MGAM    | ENST00000475668 | p.E419D  | c.1257 | 1.015145153 | 0     | 1 |
| 2695 MGAM    | ENST00000475668 | p.G494R  | c.1480 | 0.030290307 | 6.045 | 1 |
| 2696 VSIG4   | ENST00000374737 | p.C41Y   | c.122  | 0.01876852  | 5.936 | 1 |
| 2696 VSIG4   | ENST00000374737 | p.K129N  | c.387  | 0.025872396 | 0     | 1 |
| 2696 VSIG4   | ENST00000374737 | p.R20C   | c.58   | 0.01316315  | 6.712 | 1 |
| 2697 ALOX15B | ENST00000380183 | p.R361C  | c.1081 | 0.051903924 | 4.847 | 1 |
| 2697 ALOX15B | ENST00000380183 | p.A363V  | c.1088 | 0.021807981 | 5.519 | 1 |
| 2697 ALOX15B | ENST00000380183 | p.N247I  | c.740  | 0.056554204 | 0     | 1 |
| 2698 CSNK2B  | ENST00000375866 | p.R92H   | c.275  | 0.155609279 | 2.684 | 1 |
| 2698 CSNK2B  | ENST00000375866 | p.D26H   | c.76   | 0.155609279 | 0     | 1 |
| 2699 PREP    | ENST00000369110 | p.G579R  | c.1735 | 0.031358492 | 0     | 1 |
| 2699 PREP    | ENST00000369110 | p.L636I  | c.1906 | 0.031358492 | 4.995 | 1 |
| 2700 KLHL12  | ENST00000435533 | p.G517W  | c.1549 | 0.027412923 | 5.189 | 1 |

|               |                 |          |         |             |       |   |
|---------------|-----------------|----------|---------|-------------|-------|---|
| 2700 KLHL12   | ENST00000435533 | p.C549W  | c.1647  | 0.027412923 | 0     | 1 |
| 2701 ACO1     | ENST00000379923 | p.P606L  | c.1817  | 1.081446697 | 0     | 1 |
| 2701 ACO1     | ENST00000379923 | p.P606Q  | c.1817  | 1.081446697 | 0     | 1 |
| 2701 ACO1     | ENST00000379923 | p.V321A  | c.962   | 0.162893394 | 3.618 | 1 |
| 2702 FGA      | ENST00000302053 | p.E147K  | c.439   | 0.0093294   | 6.744 | 1 |
| 2702 FGA      | ENST00000302053 | p.L154I  | c.460   | 0.00994371  | 6.652 | 1 |
| 2702 FGA      | ENST00000302053 | p.D211E  | c.633   | 0.01927311  | 0     | 1 |
| 2703 HAO1     | ENST00000378789 | p.V360M  | c.1078  | 0.008093615 | 6.949 | 1 |
| 2703 HAO1     | ENST00000378789 | p.T64P   | c.190   | 0.015777364 | 5.986 | 1 |
| 2703 HAO1     | ENST00000378789 | p.L304R  | c.911   | 0.023870979 | 0     | 1 |
| 2704 MTPAP    | ENST00000358107 | p.E468K  | c.1402  | 0.121852284 | 0     | 1 |
| 2704 MTPAP    | ENST00000358107 | p.R192T  | c.575   | 0.017061809 | 6.019 | 1 |
| 2704 MTPAP    | ENST00000358107 | p.F193L  | c.579   | 0.109977942 | 3.232 | 1 |
| 2705 SERPINB2 | ENST00000457692 | p.S36A   | c.106   | 0.023131458 | 5.434 | 1 |
| 2705 SERPINB2 | ENST00000457692 | p.A7T    | c.19    | 0.023131458 | 0     | 1 |
| 2707 MTR      | ENST00000366577 | p.D1043N | c.3127  | 0.022577037 | 5.469 | 1 |
| 2707 MTR      | ENST00000366577 | p.C1081Y | c.3242  | 0.022577037 | 0     | 1 |
| 2708 SATB2    | ENST00000260926 | p.V358M  | c.1072  | 1.147419574 | 0     | 1 |
| 2708 SATB2    | ENST00000260926 | p.V358A  | c.1073  | 1.147419574 | 0     | 1 |
| 2708 SATB2    | ENST00000260926 | p.N420K  | c.1260  | 0.294839148 | 2.762 | 1 |
| 2709 KDM1B    | ENST00000388870 | p.R338L  | c.1013  | 0.038993562 | 0     | 1 |
| 2709 KDM1B    | ENST00000388870 | p.W139C  | c.417   | 0.032484741 | 5.463 | 1 |
| 2709 KDM1B    | ENST00000388870 | p.E156K  | c.466   | 0.016322434 | 5.937 | 1 |
| 2710 CD8A     | ENST00000352580 | p.L71V   | c.211   | 0.011948721 | 6.387 | 1 |
| 2710 CD8A     | ENST00000352580 | p.S116L  | c.347   | 0.011948721 | 0     | 1 |
| 2711 HMGCS2   | ENST00000369406 | p.S484N  | c.1451  | 0.018262145 | 6.775 | 1 |
| 2711 HMGCS2   | ENST00000369406 | p.E100K  | c.298   | 1.009131072 | 0     | 1 |
| 2711 HMGCS2   | ENST00000369406 | p.E100V  | c.299   | 1.009131072 | 0     | 1 |
| 2712 CHP2     | ENST00000300113 | p.S132A  | c.394   | 0.050032176 | 0     | 1 |
| 2712 CHP2     | ENST00000300113 | p.A171V  | c.512   | 0.050032176 | 4.321 | 1 |
| 2713 TALDO1   | ENST00000319006 | p.R70Q   | c.209   | 1.049480367 | 0     | 2 |
| 2713 TALDO1   | ENST00000319006 | p.R329L  | c.986   | 0.108257856 | 4.337 | 1 |
| 2714 FOXO3    | ENST00000406360 | p.R222W  | c.664   | 0.059829466 | 0     | 1 |
| 2714 FOXO3    | ENST00000406360 | p.G244A  | c.731   | 0.059829466 | 4.063 | 1 |
| 2715 BIRC6    | ENST00000421745 | p.S4596I | c.13787 | 0.007662336 | 0     | 1 |
| 2715 BIRC6    | ENST00000421745 | p.T4672M | c.14015 | 0.007662336 | 7.028 | 1 |
| 2716 FCAR     | ENST00000345937 | p.V12M   | c.34    | 0.017253488 | 0     | 1 |
| 2717 CUL5     | ENST00000531427 | p.R711Q  | c.2132  | 0.175190931 | 3.513 | 1 |
| 2717 CUL5     | ENST00000531427 | p.M752I  | c.2256  | 1.087595466 | 0     | 2 |
| 2718 GH1      | ENST00000323322 | p.D52Y   | c.154   | 0.042896388 | 0     | 1 |
| 2718 GH1      | ENST00000323322 | p.Y129C  | c.386   | 0.042896388 | 4.543 | 1 |
| 2719 PTK2     | ENST00000519419 | p.E460D  | c.1380  | 0.013276328 | 6.235 | 1 |
| 2719 PTK2     | ENST00000519419 | p.R520C  | c.1558  | 0.013276328 | 0     | 1 |
| 2720 GRK6     | ENST00000528793 | p.F197L  | c.591   | 0.033896338 | 0     | 1 |
| 2720 GRK6     | ENST00000528793 | p.K223N  | c.669   | 0.014659706 | 6.092 | 1 |
| 2720 GRK6     | ENST00000528793 | p.A231V  | c.692   | 0.019236631 | 5.7   | 1 |
| 2721 MSN      | ENST00000360270 | p.E573K  | c.1717  | 2.058517015 | 0     | 3 |
| 2721 MSN      | ENST00000360270 | p.S207N  | c.620   | 0.175551046 | 4.095 | 1 |
| 2722 GRIA2    | ENST00000296526 | p.G366E  | c.1097  | 0.025312609 | 0     | 1 |



|      |          |                 |          |        |             |       |   |
|------|----------|-----------------|----------|--------|-------------|-------|---|
| 2722 | GRIA2    | ENST00000296526 | p.M128I  | c.384  | 0.025312609 | 5.304 | 1 |
| 2723 | XPO5     | ENST00000265351 | p.R368H  | c.1103 | 0.017361361 | 0     | 1 |
| 2723 | XPO5     | ENST00000265351 | p.S422F  | c.1265 | 0.013640119 | 6.196 | 1 |
| 2723 | XPO5     | ENST00000265351 | p.D425Y  | c.1273 | 0.003721242 | 8.07  | 1 |
| 2724 | LHCGR    | ENST00000294954 | p.K62N   | c.186  | 0.200796667 | 0     | 1 |
| 2724 | LHCGR    | ENST00000294954 | p.D84N   | c.250  | 0.153904663 | 2.777 | 1 |
| 2724 | LHCGR    | ENST00000294954 | p.R88K   | c.263  | 0.078162301 | 4.187 | 1 |
| 2725 | NUDT9    | ENST00000302174 | p.A101T  | c.301  | 0.114830087 | 3.6   | 1 |
| 2725 | NUDT9    | ENST00000302174 | p.W110C  | c.330  | 0.065941295 | 4.037 | 1 |
| 2725 | NUDT9    | ENST00000302174 | p.R159W  | c.475  | 0.029591488 | 8.793 | 1 |
| 2725 | NUDT9    | ENST00000302174 | p.L161R  | c.482  | 0.145641185 | 0     | 1 |
| 2726 | DUPD1    | ENST00000338487 | p.Y63C   | c.188  | 0.012090352 | 6.37  | 1 |
| 2726 | DUPD1    | ENST00000338487 | p.V148I  | c.442  | 0.008961774 | 6.802 | 1 |
| 2726 | DUPD1    | ENST00000338487 | p.R181C  | c.541  | 0.021052125 | 0     | 1 |
| 2727 | IFNA2    | ENST00000380206 | p.R185K  | c.554  | 0.10424138  | 0     | 1 |
| 2727 | IFNA2    | ENST00000380206 | p.L32M   | c.94   | 0.10424138  | 3.262 | 1 |
| 2728 | SERPINB2 | ENST00000457692 | p.E365D  | c.1095 | 0.156285    | 4.151 | 1 |
| 2728 | SERPINB2 | ENST00000457692 | p.G206R  | c.616  | 1.058749339 | 0     | 1 |
| 2728 | SERPINB2 | ENST00000457692 | p.G206E  | c.617  | 1.058749339 | 0     | 1 |
| 2728 | SERPINB2 | ENST00000457692 | p.P211S  | c.631  | 0.048627182 | 8.667 | 1 |
| 2729 | ENPEP    | ENST00000265162 | p.K348T  | c.1043 | 0.155933196 | 0     | 1 |
| 2729 | ENPEP    | ENST00000265162 | p.Y310D  | c.928  | 0.155933196 | 2.681 | 1 |
| 2730 | NPM1     | ENST00000517671 | p.D55N   | c.163  | 0.003966274 | 0     | 1 |
| 2730 | NPM1     | ENST00000517671 | p.S106L  | c.317  | 0.003966274 | 7.978 | 1 |
| 2731 | CXCL12   | ENST00000395794 | p.P53L   | c.158  | 0.079770548 | 3.648 | 1 |
| 2731 | CXCL12   | ENST00000395794 | p.C30R   | c.88   | 0.079770548 | 0     | 1 |
| 2732 | CNOT7    | ENST00000361272 | p.H157Y  | c.469  | 0.220561468 | 0     | 1 |
| 2732 | CNOT7    | ENST00000361272 | p.K196N  | c.588  | 0.162794114 | 2.714 | 1 |
| 2732 | CNOT7    | ENST00000361272 | p.G208V  | c.623  | 0.05472577  | 4.423 | 1 |
| 2732 | CNOT7    | ENST00000361272 | p.L209F  | c.627  | 0.025824074 | 5.537 | 1 |
| 2733 | TNPO1    | ENST00000337273 | p.L546V  | c.1636 | 0.009469227 | 9.494 | 1 |
| 2733 | TNPO1    | ENST00000337273 | p.P576S  | c.1726 | 0.183762732 | 2.543 | 1 |
| 2733 | TNPO1    | ENST00000337273 | p.P611Q  | c.1832 | 0.196836713 | 0     | 1 |
| 2733 | TNPO1    | ENST00000337273 | p.P644S  | c.1930 | 0.03683434  | 5.389 | 1 |
| 2734 | SAE1     | ENST00000270225 | p.E50K   | c.148  | 0.015030116 | 0     | 1 |
| 2734 | SAE1     | ENST00000270225 | p.V306A  | c.917  | 0.015030116 | 6.056 | 1 |
| 2735 | CAPN9    | ENST00000271971 | p.A101T  | c.301  | 0.087680547 | 0     | 1 |
| 2735 | CAPN9    | ENST00000271971 | p.A192T  | c.574  | 0.044728183 | 4.546 | 1 |
| 2735 | CAPN9    | ENST00000271971 | p.M196I  | c.588  | 0.055868455 | 4.478 | 1 |
| 2736 | CTBP2    | ENST00000494626 | p.A194V  | c.581  | 0.006707542 | 7.22  | 1 |
| 2736 | CTBP2    | ENST00000494626 | p.H242Y  | c.724  | 0.006707542 | 0     | 1 |
| 2737 | ARG2     | ENST00000261783 | p.R90C   | c.268  | 0.03125     | 0     | 1 |
| 2737 | ARG2     | ENST00000261783 | p.F181L  | c.543  | 0.03125     | 5     | 1 |
| 2738 | CHI3L2   | ENST00000445067 | p.R40Q   | c.119  | 0.006434305 | 7.28  | 1 |
| 2738 | CHI3L2   | ENST00000445067 | p.G44E   | c.131  | 0.009598336 | 6.703 | 1 |
| 2738 | CHI3L2   | ENST00000445067 | p.K172E  | c.514  | 0.016032641 | 0     | 1 |
| 2739 | BDH2     | ENST00000296424 | p.T208M  | c.623  | 0.015635834 | 0     | 1 |
| 2739 | BDH2     | ENST00000296424 | p.A230D  | c.689  | 0.015635834 | 5.999 | 1 |
| 2740 | CR1      | ENST00000367052 | p.L1781P | c.5342 | 0.013202912 | 7.243 | 1 |

|             |                 |          |           |             |       |   |
|-------------|-----------------|----------|-----------|-------------|-------|---|
| 2740 CR1    | ENST00000367052 | p.R1839G | c.5515    | 1.006601456 | 0     | 1 |
| 2740 CR1    | ENST00000367052 | p.R1839L | c.5516    | 1.006601456 | 0     | 1 |
| 2741 CDC14B | ENST00000375236 | p.R348K  | c.1043    | 0.025085543 | 5.317 | 1 |
| 2741 CDC14B | ENST00000375236 | p.T321M  | c.962     | 0.025085543 | 0     | 1 |
| 2742 CD40LG | ENST00000370629 | p.R181L  | c.542     | 1.156117972 | 0     | 1 |
| 2742 CD40LG | ENST00000370629 | p.R181Q  | c.542     | 1.156117972 | 0     | 1 |
| 2742 CD40LG | ENST00000370629 | p.T211N  | c.632     | 0.113123808 | 4.216 | 1 |
| 2742 CD40LG | ENST00000370629 | p.A215T  | c.643     | 0.210122455 | 3.289 | 1 |
| 2743 CA1    | ENST00000523022 | p.L165I  | c.493     | 1.0431327   | 5.607 | 1 |
| 2743 CA1    | ENST00000523022 | p.L165P  | c.494     | 1.0431327   | 5.607 | 1 |
| 2743 CA1    | ENST00000523022 | p.A167G  | c.500     | 0.208670845 | 3.29  | 1 |
| 2743 CA1    | ENST00000523022 | p.S229I  | c.686     | 1.143272792 | 0     | 1 |
| 2743 CA1    | ENST00000523022 | p.S229R  | c.687     | 1.143272792 | 0     | 1 |
| 2744 CALR   | ENST00000316448 | p.T346M  | c.1037    | 0.008437317 | 6.889 | 1 |
| 2744 CALR   | ENST00000316448 | p.K62R   | c.185     | 0.008437317 | 0     | 1 |
| 2745 PDE1B  | ENST00000243052 | p.D177V  | c.530     | 0.076553577 | 3.857 | 1 |
| 2745 PDE1B  | ENST00000243052 | p.A179T  | c.535     | 0.116813476 | 3.194 | 1 |
| 2745 PDE1B  | ENST00000243052 | p.E212K  | c.634     | 0.178284755 | 0     | 1 |
| 2746 NCAM2  | ENST00000400546 | p.H366L  | c.1097    | 0.149732858 | 2.812 | 1 |
| 2746 NCAM2  | ENST00000400546 | p.D369Y  | c.1105    | 0.077922355 | 4.279 | 1 |
| 2746 NCAM2  | ENST00000400546 | p.E314D  | c.942     | 0.020059963 | 9.991 | 1 |
| 2746 NCAM2  | ENST00000400546 | p.Q317K  | c.949     | 0.194890726 | 0     | 1 |
| 2747 WDR5   | ENST00000358625 | p.D150G  | c.449     | 0.010833863 | 9.389 | 1 |
| 2747 WDR5   | ENST00000358625 | p.S171L  | c.512     | 0.173413259 | 2.647 | 1 |
| 2747 WDR5   | ENST00000358625 | p.D192N  | c.574     | 0.188823476 | 0     | 1 |
| 2747 WDR5   | ENST00000358625 | p.V217M  | c.649     | 0.032099432 | 5.175 | 1 |
| 2748 PTPRF  | ENST00000359947 | p.F1365S | c.4094    | 0.022618763 | 0     | 1 |
| 2748 PTPRF  | ENST00000359947 | p.I1397F | c.4189    | 0.016227485 | 6.93  | 1 |
| 2748 PTPRF  | ENST00000359947 | p.A1647V | c.4940    | 0.014417851 | 6.116 | 1 |
| 2749 NTNG1  | ENST00000542803 | p.G461R  | c.1381    | 0.002561137 | 8.609 | 1 |
| 2749 NTNG1  | ENST00000542803 | p.P464S  | c.1390    | 0.026424134 | 5.242 | 1 |
| 2749 NTNG1  | ENST00000542803 | p.A491S  | c.1471    | 0.028985271 | 0     | 1 |
| 2750 ERO1L  | ENST00000554019 | p.V39A   | c.116     | 0.154517798 | 0     | 1 |
| 2751 API5   | ENST00000531273 | p.K153N  | c.459     | 0.014111352 | 6.147 | 1 |
| 2751 API5   | ENST00000531273 | p.I197M  | c.591     | 0.014111352 | 0     | 1 |
| 2752 CFHR2  | ENST00000367421 | p.E215K  | c.643     | 1.006206519 | 8.332 | 2 |
| 2752 CFHR2  | ENST00000367421 | p.P265S  | c.793     | 1.006206519 | 0     | 1 |
| 2752 CFHR2  | ENST00000367421 | p.P265H  | c.794     | 1.006206519 | 0     | 1 |
| 2753 XDH    | ENST00000379416 | p.G445R  | c.1333    | 0.088021514 | 0     | 1 |
| 2753 XDH    | ENST00000379416 | p.D534N  | c.1600    | 0.088021514 | 3.506 | 1 |
| 2754 PHGDH  | ENST00000369409 | p.G101L  | c.301_302 | 0.196354962 | 0     | 1 |
| 2754 PHGDH  | ENST00000369409 | p.A286V  | c.857     | 0.030274727 | 5.975 | 1 |
| 2754 PHGDH  | ENST00000369409 | p.A291T  | c.871     | 0.063403527 | 4.148 | 1 |
| 2754 PHGDH  | ENST00000369409 | p.R294H  | c.881     | 0.133019949 | 3.011 | 1 |
| 2755 NCAM2  | ENST00000400546 | p.G35A   | c.104     | 0.008961774 | 6.802 | 1 |
| 2755 NCAM2  | ENST00000400546 | p.I85M   | c.255     | 0.008961774 | 0     | 1 |
| 2757 NUP107 | ENST00000229179 | p.R669C  | c.2005    | 0.01612005  | 0     | 1 |
| 2757 NUP107 | ENST00000229179 | p.F699L  | c.2097    | 0.01612005  | 5.955 | 1 |
| 2758 YWHAG  | ENST00000307630 | p.V52I   | c.154     | 0.005774853 | 7.436 | 1 |

|               |                 |          |           |             |       |   |
|---------------|-----------------|----------|-----------|-------------|-------|---|
| 2758 YWHAG    | ENST00000307630 | p.R57C   | c.169     | 0.009971319 | 6.648 | 1 |
| 2758 YWHAG    | ENST00000307630 | p.C97S   | c.289_288 | 0.015746172 | 0     | 1 |
| 2759 PREP     | ENST00000369110 | p.T590N  | c.1769    | 0.081559684 | 3.616 | 1 |
| 2759 PREP     | ENST00000369110 | p.R643C  | c.1927    | 0.081559684 | 0     | 1 |
| 2760 RTN4IP1  | ENST00000369063 | p.R339H  | c.1016    | 0.004189518 | 0     | 1 |
| 2760 RTN4IP1  | ENST00000369063 | p.G197C  | c.589     | 0.004189518 | 7.899 | 1 |
| 2761 PTPRS    | ENST00000372412 | p.T1888M | c.5663    | 0.032986054 | 5.922 | 1 |
| 2761 PTPRS    | ENST00000372412 | p.R1920L | c.5759    | 1.016493027 | 0     | 1 |
| 2761 PTPRS    | ENST00000372412 | p.R1920Q | c.5759    | 1.016493027 | 0     | 1 |
| 2762 SERPINE1 | ENST00000223095 | p.G86R   | c.256     | 0.020847237 | 5.584 | 1 |
| 2762 SERPINE1 | ENST00000223095 | p.R154K  | c.461     | 0.020847237 | 0     | 1 |
| 2763 P2RY11   | ENST00000321826 | p.S260T  | c.778     | 0.030353359 | 0     | 1 |
| 2763 P2RY11   | ENST00000321826 | p.L312P  | c.935     | 0.030353359 | 5.042 | 1 |
| 2764 CCNH     | ENST00000256897 | p.R77K   | c.230     | 0.235753978 | 0     | 1 |
| 2764 CCNH     | ENST00000256897 | p.Y164S  | c.491     | 0.137338964 | 3.194 | 1 |
| 2764 CCNH     | ENST00000256897 | p.D192N  | c.574     | 0.154548287 | 2.983 | 1 |
| 2765 FBP2     | ENST00000375337 | p.R50C   | c.148     | 0.291001356 | 0     | 1 |
| 2765 FBP2     | ENST00000375337 | p.G169S  | c.505     | 0.181807775 | 2.636 | 1 |
| 2765 FBP2     | ENST00000375337 | p.T172A  | c.514     | 0.151061818 | 2.942 | 1 |
| 2766 NFU1     | ENST00000410022 | p.T85I   | c.254     | 0.209496784 | 2.255 | 1 |
| 2766 NFU1     | ENST00000410022 | p.F113L  | c.339     | 0.209496784 | 0     | 1 |
| 2767 AMY2A    | ENST00000414303 | p.G54E   | c.161     | 1.021463066 | 0     | 2 |
| 2767 AMY2A    | ENST00000414303 | p.R25W   | c.73      | 0.042926132 | 5.542 | 1 |
| 2768 PDE2A    | ENST00000334456 | p.S692P  | c.2074    | 1.12431265  | 0     | 1 |
| 2768 PDE2A    | ENST00000334456 | p.S692F  | c.2075    | 1.12431265  | 0     | 1 |
| 2768 PDE2A    | ENST00000334456 | p.M761L  | c.2281    | 0.203357347 | 3.315 | 1 |
| 2768 PDE2A    | ENST00000334456 | p.R762L  | c.2285    | 0.080200844 | 5.391 | 1 |
| 2769 SENP1    | ENST00000549518 | p.A492V  | c.1475    | 0.022081776 | 0     | 1 |
| 2769 SENP1    | ENST00000549518 | p.V526A  | c.1577    | 0.022081776 | 5.501 | 1 |
| 2770 INTS3    | ENST00000318967 | p.R334H  | c.1001    | 0.040442052 | 4.628 | 1 |
| 2770 INTS3    | ENST00000318967 | p.L135M  | c.403     | 0.040442052 | 0     | 1 |
| 2771 PSMF1    | ENST00000333082 | p.S88I   | c.263     | 0.012551469 | 6.316 | 1 |
| 2771 PSMF1    | ENST00000333082 | p.K125R  | c.374     | 0.015388538 | 6.022 | 1 |
| 2771 PSMF1    | ENST00000333082 | p.R18S   | c.54      | 0.027940007 | 0     | 1 |
| 2772 MTOR     | ENST00000361445 | p.A1459P | c.4375    | 0.356079467 | 3.546 | 1 |
| 2772 MTOR     | ENST00000361445 | p.L1460P | c.4379    | 1.325009345 | 3.652 | 2 |
| 2772 MTOR     | ENST00000361445 | p.C1483R | c.4447    | 3.244713928 | 0     | 1 |
| 2772 MTOR     | ENST00000361445 | p.C1483F | c.4448    | 3.244713928 | 0     | 2 |
| 2772 MTOR     | ENST00000361445 | p.C1483Y | c.4448    | 3.244713928 | 0     | 1 |
| 2773 MMP13    | ENST00000260302 | p.S342Y  | c.1025    | 0.028497911 | 0     | 1 |
| 2773 MMP13    | ENST00000260302 | p.D407N  | c.1219    | 0.028497911 | 5.133 | 1 |
| 2774 IGBP1    | ENST00000342206 | p.R98C   | c.292     | 0.010019817 | 6.641 | 1 |
| 2774 IGBP1    | ENST00000342206 | p.R104Q  | c.311     | 0.006735496 | 7.214 | 1 |
| 2774 IGBP1    | ENST00000342206 | p.I215L  | c.643     | 0.016755314 | 0     | 1 |
| 2775 GSK3A    | ENST0000022330  | p.V240L  | c.718     | 0.034291623 | 4.866 | 1 |
| 2775 GSK3A    | ENST0000022330  | p.L270W  | c.809     | 0.034291623 | 0     | 1 |
| 2776 AOC3     | ENST00000308423 | p.T504S  | c.1510    | 0.045468108 | 8.343 | 1 |
| 2776 AOC3     | ENST00000308423 | p.R566W  | c.1696    | 0.164720017 | 3.715 | 1 |
| 2776 AOC3     | ENST00000308423 | p.P600R  | c.1799    | 0.177235386 | 0     | 1 |

|               |                 |          |             |             |       |   |
|---------------|-----------------|----------|-------------|-------------|-------|---|
| 2776 AOC3     | ENST00000308423 | p.N709H  | c.2125      | 0.148078748 | 3.351 | 1 |
| 2777 FGB      | ENST00000302068 | p.Q362H  | c.1086      | 0.037917299 | 5.721 | 1 |
| 2777 FGB      | ENST00000302068 | p.D327N  | c.979       | 1.018958649 | 0     | 2 |
| 2778 GPT2     | ENST00000340124 | p.P377H  | c.1130      | 0.09207798  | 3.441 | 1 |
| 2778 GPT2     | ENST00000340124 | p.L183P  | c.548       | 0.09207798  | 0     | 1 |
| 2779 ELAC1    | ENST00000269466 | p.H67Q   | c.201       | 0.140691669 | 0     | 1 |
| 2779 ELAC1    | ENST00000269466 | p.A13T   | c.37        | 0.03668159  | 5.6   | 1 |
| 2779 ELAC1    | ENST00000269466 | p.D253Y  | c.757       | 0.136138637 | 3.058 | 1 |
| 2780 FKBP4    | ENST0000001008  | p.A338V  | c.1013      | 0.010323967 | 6.833 | 1 |
| 2780 FKBP4    | ENST0000001008  | p.G360R  | c.1078      | 0.185793191 | 0     | 1 |
| 2780 FKBP4    | ENST0000001008  | p.T391I  | c.1172_1173 | 0.178574635 | 2.498 | 1 |
| 2781 ACTN2    | ENST00000542672 | p.Q573H  | c.1719      | 0.017998244 | 5.796 | 1 |
| 2781 ACTN2    | ENST00000542672 | p.E583D  | c.1749      | 0.021597378 | 5.533 | 1 |
| 2781 ACTN2    | ENST00000542672 | p.M604I  | c.1812      | 0.039595623 | 0     | 1 |
| 2782 SNX33    | ENST00000308527 | p.R519H  | c.1556      | 0.005766853 | 8.438 | 1 |
| 2782 SNX33    | ENST00000308527 | p.A529V  | c.1586      | 0.012421645 | 7.331 | 1 |
| 2782 SNX33    | ENST00000308527 | p.H533R  | c.1598      | 0.003069033 | 9.348 | 1 |
| 2782 SNX33    | ENST00000308527 | p.V283I  | c.847       | 1.010628765 | 0     | 2 |
| 2783 WARS     | ENST00000355338 | p.R162W  | c.484       | 0.110644221 | 0     | 1 |
| 2783 WARS     | ENST00000355338 | p.M195I  | c.585       | 0.110644221 | 3.176 | 1 |
| 2784 FLNC     | ENST00000325888 | p.R1543W | c.4627      | 0.127696472 | 3.22  | 1 |
| 2784 FLNC     | ENST00000325888 | p.A1566G | c.4697      | 0.297179641 | 0     | 1 |
| 2784 FLNC     | ENST00000325888 | p.G1596D | c.4787      | 0.210234754 | 2.397 | 1 |
| 2785 HDAC8    | ENST00000373573 | p.V376A  | c.1127      | 0.048227505 | 4.374 | 1 |
| 2785 HDAC8    | ENST00000373573 | p.F189L  | c.567       | 0.010798689 | 6.533 | 1 |
| 2785 HDAC8    | ENST00000373573 | p.R223W  | c.667       | 0.059026195 | 0     | 1 |
| 2786 HK2      | ENST00000290573 | p.R462Q  | c.1385      | 0.008704638 | 6.844 | 1 |
| 2786 HK2      | ENST00000290573 | p.G74W   | c.220       | 0.02624716  | 0     | 1 |
| 2786 HK2      | ENST00000290573 | p.Y219F  | c.656       | 0.017542522 | 5.833 | 1 |
| 2787 HSD11B1  | ENST00000367027 | p.L128I  | c.382       | 0.068109507 | 3.876 | 1 |
| 2787 HSD11B1  | ENST00000367027 | p.S196Y  | c.587       | 0.068109507 | 0     | 1 |
| 2788 SERPIND1 | ENST00000406799 | p.A334T  | c.1000      | 0.116933444 | 3.125 | 1 |
| 2788 SERPIND1 | ENST00000406799 | p.D343A  | c.1028      | 0.012137029 | 6.521 | 1 |
| 2788 SERPIND1 | ENST00000406799 | p.R390Q  | c.1169      | 0.134760101 | 0     | 1 |
| 2788 SERPIND1 | ENST00000406799 | p.F86V   | c.256       | 0.044999372 | 6.757 | 1 |
| 2789 IL1R2    | ENST00000332549 | p.S145L  | c.434       | 0.076946526 | 0     | 1 |
| 2789 IL1R2    | ENST00000332549 | p.D196Y  | c.586       | 0.076946526 | 3.7   | 1 |
| 2790 GOT1     | ENST00000370508 | p.E179K  | c.535       | 0.005020337 | 7.638 | 1 |
| 2790 GOT1     | ENST00000370508 | p.Q208H  | c.624       | 0.019102376 | 0     | 1 |
| 2790 GOT1     | ENST00000370508 | p.Y243C  | c.728       | 0.014082038 | 6.15  | 1 |
| 2791 SERPINA3 | ENST00000467132 | p.I251T  | c.752       | 0.09226965  | 3.438 | 1 |
| 2791 SERPINA3 | ENST00000467132 | p.S302P  | c.904       | 0.09226965  | 0     | 1 |
| 2792 HIST1H4J | ENST00000355057 | p.I35V   | c.103       | 0.084766767 | 3.715 | 1 |
| 2792 HIST1H4C | ENST00000377803 | p.R56G   | c.166       | 0.189296449 | 0     | 1 |
| 2792 HIST4H4  | ENST00000539745 | p.D25N   | c.73        | 0.024392126 | 5.582 | 1 |
| 2792 HIST1H4H | ENST00000289352 | p.T31A   | c.91        | 0.101222279 | 3.438 | 1 |
| 2793 GCKR     | ENST00000264717 | p.N35T   | c.104       | 0.175543554 | 0     | 1 |
| 2793 GCKR     | ENST00000264717 | p.G250R  | c.748       | 0.043222507 | 4.718 | 1 |
| 2793 GCKR     | ENST00000264717 | p.P251L  | c.752       | 0.142773606 | 2.862 | 1 |

|              |                 |          |        |             |       |   |
|--------------|-----------------|----------|--------|-------------|-------|---|
| 2794 DMC1    | ENST00000216024 | p.M200I  | c.600  | 0.008644511 | 0     | 1 |
| 2794 DMC1    | ENST00000216024 | p.A247V  | c.740  | 0.008644511 | 6.854 | 1 |
| 2795 QSOX1   | ENST00000367602 | p.P342S  | c.1024 | 0.007609408 | 7.038 | 1 |
| 2795 QSOX1   | ENST00000367602 | p.F535C  | c.1604 | 0.014401163 | 0     | 1 |
| 2795 QSOX1   | ENST00000367602 | p.K298N  | c.894  | 0.006791754 | 7.202 | 1 |
| 2796 DOCK2   | ENST00000256935 | p.G1349S | c.4045 | 0.03514636  | 5.045 | 1 |
| 2796 DOCK2   | ENST00000256935 | p.R1357W | c.4069 | 0.005512796 | 7.503 | 1 |
| 2796 DOCK2   | ENST00000256935 | p.G1395A | c.4184 | 0.03514636  | 5.045 | 1 |
| 2796 DOCK2   | ENST00000256935 | p.N1400H | c.4198 | 0.06609341  | 0     | 1 |
| 2797 DECR2   | ENST00000219481 | p.R170Q  | c.509  | 0.010159689 | 6.621 | 1 |
| 2797 DECR2   | ENST00000219481 | p.G270E  | c.809  | 0.010159689 | 0     | 1 |
| 2798 PTPRF   | ENST00000359947 | p.R63H   | c.188  | 2.037986506 | 0     | 3 |
| 2798 PTPRF   | ENST00000359947 | p.D85G   | c.254  | 0.079382373 | 5.24  | 1 |
| 2798 PTPRF   | ENST00000359947 | p.P33S   | c.97   | 0.034577144 | 6.439 | 1 |
| 2799 PAK7    | ENST00000378423 | p.R433W  | c.1297 | 2.059012318 | 0     | 3 |
| 2799 PAK7    | ENST00000378423 | p.R483Q  | c.1448 | 1.140407022 | 7.424 | 2 |
| 2799 PAK7    | ENST00000378423 | p.D517N  | c.1549 | 0.387973947 | 4.4   | 1 |
| 2800 BCAT2   | ENST00000593515 | p.R211Q  | c.632  | 0.095193046 | 3.393 | 1 |
| 2800 BCAT2   | ENST00000593515 | p.E256V  | c.767  | 0.095193046 | 0     | 1 |
| 2801 TCN1    | ENST00000257264 | p.A54T   | c.160  | 0.037447157 | 4.739 | 1 |
| 2801 TCN1    | ENST00000257264 | p.E94Q   | c.280  | 0.037447157 | 0     | 1 |
| 2802 CNDP1   | ENST00000358821 | p.F398S  | c.1193 | 0.007218926 | 7.114 | 1 |
| 2802 CNDP1   | ENST00000358821 | p.S282N  | c.845  | 0.007218926 | 0     | 1 |
| 2803 FNDC3A  | ENST00000541916 | p.E521Q  | c.1561 | 0.208193943 | 0     | 1 |
| 2803 FNDC3A  | ENST00000541916 | p.F557L  | c.1671 | 0.208193943 | 2.264 | 1 |
| 2804 IGF1R   | ENST00000268035 | p.R1042C | c.3124 | 0.008728806 | 0     | 1 |
| 2804 IGF1R   | ENST00000268035 | p.L1174M | c.3520 | 0.008728806 | 6.84  | 1 |
| 2805 C1QC    | ENST00000374640 | p.P163S  | c.487  | 0.167738951 | 2.762 | 1 |
| 2805 C1QC    | ENST00000374640 | p.G164D  | c.491  | 0.158153023 | 2.859 | 1 |
| 2805 C1QC    | ENST00000374640 | p.D245N  | c.733  | 0.285253219 | 0     | 1 |
| 2806 NT5E    | ENST00000257770 | p.Q231H  | c.693  | 0.040023746 | 5.643 | 1 |
| 2806 NT5E    | ENST00000257770 | p.R273W  | c.817  | 1.032606917 | 0     | 2 |
| 2806 NT5E    | ENST00000257770 | p.V300I  | c.898  | 0.025190088 | 6.311 | 1 |
| 2807 ARG1    | ENST00000356962 | p.V92E   | c.275  | 0.023163547 | 5.432 | 1 |
| 2807 ARG1    | ENST00000356962 | p.A120V  | c.359  | 0.036851021 | 0     | 1 |
| 2807 ARG1    | ENST00000356962 | p.T174I  | c.521  | 0.013687474 | 6.191 | 1 |
| 2808 PTPRS   | ENST00000372412 | p.S1774L | c.5321 | 0.035996489 | 4.796 | 1 |
| 2808 PTPRS   | ENST00000372412 | p.R1835Q | c.5504 | 0.035996489 | 0     | 1 |
| 2809 CTNNBL1 | ENST00000361383 | p.E443Q  | c.1327 | 0.020832792 | 5.585 | 1 |
| 2809 CTNNBL1 | ENST00000361383 | p.R522Q  | c.1565 | 0.020832792 | 0     | 1 |
| 2811 ADH4    | ENST00000508393 | p.A34T   | c.100  | 0.028954622 | 5.52  | 1 |
| 2811 ADH4    | ENST00000508393 | p.V86I   | c.256  | 0.10386294  | 0     | 1 |
| 2811 ADH4    | ENST00000508393 | p.S169R  | c.507  | 0.083858613 | 3.607 | 1 |
| 2812 VAV1    | ENST00000602142 | p.P508L  | c.1523 | 0.009992075 | 0     | 1 |
| 2812 VAV1    | ENST00000602142 | p.E556K  | c.1666 | 0.009992075 | 6.645 | 1 |
| 2813 TLR8    | ENST00000311912 | p.H788R  | c.2363 | 0.066339157 | 0     | 1 |
| 2813 TLR8    | ENST00000311912 | p.P814T  | c.2440 | 0.057688689 | 4.476 | 1 |
| 2813 TLR8    | ENST00000311912 | p.I820M  | c.2460 | 0.02140364  | 5.546 | 1 |
| 2814 RPS3A   | ENST00000274065 | p.H124Y  | c.370  | 0.002538162 | 8.622 | 1 |

|      |         |                 |          |           |             |       |   |
|------|---------|-----------------|----------|-----------|-------------|-------|---|
| 2814 | RPS3A   | ENST00000274065 | p.L218P  | c.653     | 0.002538162 | 0     | 1 |
| 2815 | ZSWIM2  | ENST00000295131 | p.Y247H  | c.739     | 0.392673367 | 2.502 | 1 |
| 2815 | ZSWIM2  | ENST00000295131 | p.T250S  | c.749     | 0.488364792 | 2.156 | 1 |
| 2815 | ZSWIM2  | ENST00000295131 | p.T273A  | c.817     | 1.400909313 | 0     | 1 |
| 2815 | ZSWIM2  | ENST00000295131 | p.T273I  | c.818     | 1.400909313 | 0     | 1 |
| 2817 | ETF1    | ENST00000360541 | p.A7T    | c.19      | 0.012166011 | 6.361 | 1 |
| 2817 | ETF1    | ENST00000360541 | p.Q282K  | c.844     | 0.012166011 | 0     | 1 |
| 2819 | ALOX15B | ENST00000380183 | p.S550F  | c.1649    | 0.159099367 | 2.652 | 1 |
| 2819 | ALOX15B | ENST00000380183 | p.E671K  | c.2011    | 0.159099367 | 0     | 1 |
| 2820 | AGTR1   | ENST00000404754 | p.L212I  | c.634     | 0.017836792 | 5.809 | 1 |
| 2820 | AGTR1   | ENST00000404754 | p.L247F  | c.739     | 0.017836792 | 0     | 1 |
| 2821 | PIR     | ENST00000380421 | p.A74T   | c.220     | 0.040358042 | 4.631 | 1 |
| 2821 | PIR     | ENST00000380421 | p.P105T  | c.313     | 0.040358042 | 0     | 1 |
| 2822 | TNFSF4  | ENST00000281834 | p.N96S   | c.287     | 0.008765183 | 6.834 | 1 |
| 2822 | TNFSF4  | ENST00000281834 | p.E179K  | c.535     | 0.008765183 | 0     | 1 |
| 2823 | NAGK    | ENST00000455662 | p.I170V  | c.508     | 0.015336031 | 6.415 | 1 |
| 2823 | NAGK    | ENST00000455662 | p.G191A  | c.572     | 0.024990966 | 5.548 | 1 |
| 2823 | NAGK    | ENST00000455662 | p.H291Y  | c.871     | 0.033093044 | 0     | 1 |
| 2824 | RPL26   | ENST00000583011 | p.R50Q   | c.149     | 0.001433741 | 0     | 1 |
| 2824 | RPL26   | ENST00000583011 | p.R26G   | c.76      | 0.001433741 | 9.446 | 1 |
| 2825 | S100A13 | ENST00000368699 | p.H48Y   | c.142     | 0.107917445 | 0     | 1 |
| 2825 | S100A13 | ENST00000368699 | p.D92H   | c.274     | 0.107917445 | 3.212 | 1 |
| 2826 | USP7    | ENST00000344836 | p.Y1050C | c.3149    | 0.157890908 | 2.663 | 1 |
| 2826 | USP7    | ENST00000344836 | p.D1080N | c.3238    | 0.157890908 | 0     | 1 |
| 2827 | ME2     | ENST00000321341 | p.T423A  | c.1267    | 0.124826833 | 0     | 1 |
| 2827 | ME2     | ENST00000321341 | p.S447G  | c.1339    | 0.124826833 | 3.002 | 1 |
| 2828 | RIMS1   | ENST00000521978 | p.V600G  | c.1799    | 0.25        | 2     | 1 |
| 2828 | RIMS1   | ENST00000521978 | p.G648V  | c.1943    | 0.25        | 0     | 1 |
| 2829 | RNASEL  | ENST00000444138 | p.V181I  | c.541     | 0.012157581 | 0     | 1 |
| 2829 | RNASEL  | ENST00000444138 | p.V218M  | c.652     | 0.012157581 | 6.362 | 1 |
| 2830 | MGAM    | ENST00000475668 | p.V1008F | c.3022    | 0.016356411 | 0     | 1 |
| 2830 | MGAM    | ENST00000475668 | p.K1088T | c.3263    | 0.016356411 | 5.934 | 1 |
| 2831 | LY96    | ENST00000284818 | p.G129V  | c.386     | 0.008728806 | 6.84  | 1 |
| 2831 | LY96    | ENST00000284818 | p.S159P  | c.475     | 0.016498104 | 0     | 1 |
| 2831 | LY96    | ENST00000284818 | p.S27A   | c.79      | 0.007769298 | 7.008 | 1 |
| 2832 | SLC3A2  | ENST00000377892 | p.I336L  | c.1006    | 0.034267862 | 0     | 1 |
| 2832 | SLC3A2  | ENST00000377892 | p.E366K  | c.1096    | 0.034267862 | 4.867 | 1 |
| 2833 | CBS     | ENST00000352178 | p.P88L   | c.263     | 1.008869079 | 0     | 1 |
| 2833 | CBS     | ENST00000352178 | p.P88N   | c.263_262 | 1.008869079 | 0     | 1 |
| 2833 | CBS     | ENST00000352178 | p.R121H  | c.362     | 0.048023635 | 6.817 | 1 |
| 2834 | HDAC2   | ENST00000398283 | p.A351T  | c.1051    | 1.165411251 | 0     | 1 |
| 2834 | HDAC2   | ENST00000398283 | p.A351V  | c.1052    | 1.165411251 | 0     | 1 |
| 2834 | HDAC2   | ENST00000398283 | p.P389L  | c.1166    | 0.235079487 | 3.455 | 1 |
| 2834 | HDAC2   | ENST00000398283 | p.H262Y  | c.784     | 0.201146903 | 3.752 | 1 |
| 2835 | OTUB1   | ENST00000422031 | p.R131Q  | c.392     | 0.144686277 | 2.789 | 1 |
| 2835 | OTUB1   | ENST00000422031 | p.D206N  | c.616     | 0.144686277 | 0     | 1 |
| 2836 | IL12B   | ENST00000231228 | p.S155N  | c.464     | 0.043003679 | 5.082 | 1 |
| 2836 | IL12B   | ENST00000231228 | p.V215F  | c.643     | 0.106520662 | 3.426 | 1 |
| 2836 | IL12B   | ENST00000231228 | p.L26P   | c.77      | 0.122563673 | 0     | 1 |

|              |                 |                    |             |             |       |   |
|--------------|-----------------|--------------------|-------------|-------------|-------|---|
| 2837 ADARB1  | ENST00000496664 | p.A366T            | c.1096      | 0.00951883  | 0     | 1 |
| 2837 ADARB1  | ENST00000496664 | p.R329H            | c.986       | 0.00951883  | 6.715 | 1 |
| 2838 FLT4    | ENST00000261937 | p.G53R             | c.157       | 0.019108974 | 6.614 | 1 |
| 2838 FLT4    | ENST00000261937 | p.C111Y            | c.332       | 0.058203174 | 0     | 1 |
| 2838 FLT4    | ENST00000261937 | p.L32M             | c.94        | 0.056893941 | 4.381 | 1 |
| 2839 SH3GL3  | ENST00000324537 | p.L169Q            | c.506       | 0.009466193 | 6.723 | 1 |
| 2839 SH3GL3  | ENST00000324537 | p.L204V            | c.610       | 0.009466193 | 0     | 1 |
| 2840 MLLT4   | ENST00000400822 | p.L990in_frame_del | c.2965_2967 | 0.280527544 | 4.308 | 1 |
| 2840 MLLT4   | ENST00000400822 | p.E1003K           | c.3007      | 0.287052545 | 2.39  | 1 |
| 2840 MLLT4   | ENST00000400822 | p.Y1035C           | c.3104      | 0.695389448 | 0     | 1 |
| 2840 MLLT4   | ENST00000400822 | p.R1072M           | c.3215      | 0.547768386 | 2.054 | 1 |
| 2840 MLLT4   | ENST00000400822 | p.A1074T           | c.3220      | 0.316137957 | 2.229 | 1 |
| 2841 GSTM4   | ENST00000369836 | p.I10S             | c.29        | 0.049381343 | 0     | 1 |
| 2841 GSTM4   | ENST00000369836 | p.L166I            | c.496       | 0.007888682 | 6.986 | 1 |
| 2841 GSTM4   | ENST00000369836 | p.P205R            | c.614       | 0.041492661 | 4.591 | 1 |
| 2842 TBL1XR1 | ENST00000457928 | p.T192I            | c.575       | 0.076680311 | 3.705 | 1 |
| 2842 TBL1XR1 | ENST00000457928 | p.V228A            | c.683       | 0.076680311 | 0     | 1 |
| 2843 MAP3K5  | ENST00000359015 | p.L765F            | c.2293      | 0.073914438 | 3.758 | 1 |
| 2843 MAP3K5  | ENST00000359015 | p.F782L            | c.2346      | 0.011382806 | 6.457 | 1 |
| 2843 MAP3K5  | ENST00000359015 | p.I811V            | c.2431      | 0.085297243 | 0     | 1 |
| 2844 FYN     | ENST00000368667 | p.K347N            | c.1041      | 0.145894763 | 2.777 | 1 |
| 2844 FYN     | ENST00000368667 | p.L397I            | c.1189      | 0.145894763 | 0     | 1 |
| 2845 MACROD2 | ENST00000310348 | p.A149S            | c.445       | 0.034267862 | 4.867 | 1 |
| 2845 MACROD2 | ENST00000310348 | p.P193S            | c.577       | 0.034267862 | 0     | 1 |
| 2846 CCL1    | ENST00000225842 | p.S58C             | c.173       | 1.013387218 | 0     | 1 |
| 2846 CCL1    | ENST00000225842 | p.S58F             | c.173       | 1.013387218 | 0     | 1 |
| 2846 CCL1    | ENST00000225842 | p.R32G             | c.94        | 0.026774436 | 6.223 | 1 |
| 2847 TAT     | ENST00000355962 | p.M97I             | c.291       | 0.007080171 | 0     | 1 |
| 2847 TAT     | ENST00000355962 | p.T321I            | c.962       | 0.007080171 | 7.142 | 1 |
| 2848 SULT1E1 | ENST00000226444 | p.R129Q            | c.386       | 0.014548357 | 6.103 | 1 |
| 2848 SULT1E1 | ENST00000226444 | p.R291Q            | c.872       | 0.014548357 | 0     | 1 |
| 2849 PTEN    | ENST00000371953 | p.F215S            | c.644       | 0.082412101 | 4.601 | 1 |
| 2849 PTEN    | ENST00000371953 | p.V255in_frame_del | c.762_764   | 1.04120605  | 0     | 1 |
| 2849 PTEN    | ENST00000371953 | p.V255G            | c.764       | 1.04120605  | 0     | 1 |
| 2850 HSD17B4 | ENST00000504811 | p.L246V            | c.736       | 0.056523711 | 4.145 | 1 |
| 2850 HSD17B4 | ENST00000504811 | p.L248F            | c.742       | 0.006381008 | 7.292 | 1 |
| 2850 HSD17B4 | ENST00000504811 | p.V294L            | c.880       | 0.062904719 | 0     | 1 |
| 2851 ECHDC3  | ENST00000379215 | p.H138D            | c.412       | 0.018945513 | 5.722 | 1 |
| 2851 ECHDC3  | ENST00000379215 | p.S249F            | c.746       | 0.018945513 | 0     | 1 |
| 2852 PDE3A   | ENST00000359062 | p.A828V            | c.2483      | 0.07858549  | 3.7   | 1 |
| 2852 PDE3A   | ENST00000359062 | p.L829M            | c.2485      | 0.022939005 | 5.553 | 1 |
| 2852 PDE3A   | ENST00000359062 | p.V901F            | c.2701      | 0.098246567 | 0     | 1 |
| 2853 FBXO30  | ENST00000237281 | p.V40A             | c.119       | 0.084553014 | 3.564 | 1 |
| 2853 FBXO30  | ENST00000237281 | p.R17W             | c.49        | 0.084553014 | 0     | 1 |
| 2854 SULT1B1 | ENST00000310613 | p.P116S            | c.346       | 0.06348857  | 4.032 | 1 |
| 2854 SULT1B1 | ENST00000310613 | p.L115in_frame_del | c.346_344   | 0.075020838 | 5.83  | 1 |
| 2854 SULT1B1 | ENST00000310613 | p.S118F            | c.353       | 0.022306377 | 5.572 | 1 |
| 2854 SULT1B1 | ENST00000310613 | p.W180S            | c.539       | 0.057358093 | 9.979 | 1 |
| 2854 SULT1B1 | ENST00000310613 | p.E32K             | c.94        | 0.10072025  | 0     | 1 |

|      |          |                 |                    |             |             |       |   |
|------|----------|-----------------|--------------------|-------------|-------------|-------|---|
| 2855 | ITGB3    | ENST00000559488 | p.E511K            | c.1531      | 0.018542762 | 5.753 | 1 |
| 2855 | ITGB3    | ENST00000559488 | p.S61L             | c.182       | 0.018542762 | 0     | 1 |
| 2856 | AMPH     | ENST00000356264 | p.E40K             | c.118       | 1.077863104 | 0     | 2 |
| 2856 | AMPH     | ENST00000356264 | p.R138H            | c.413       | 0.095916714 | 4.404 | 1 |
| 2856 | AMPH     | ENST00000356264 | p.S139C            | c.415       | 0.062702932 | 5.029 | 1 |
| 2857 | CFH      | ENST00000367429 | p.E902D            | c.2706      | 0.152936005 | 0     | 1 |
| 2857 | CFH      | ENST00000367429 | p.E976K            | c.2926      | 0.152936005 | 2.709 | 1 |
| 2858 | CLK3     | ENST00000395066 | p.R156H            | c.467       | 0.028577034 | 0     | 1 |
| 2858 | CLK3     | ENST00000395066 | p.R223Q            | c.668       | 0.028577034 | 5.129 | 1 |
| 2859 | POLG     | ENST00000442287 | p.E944Q            | c.2830      | 0.023083407 | 5.437 | 1 |
| 2859 | POLG     | ENST00000442287 | p.R1071C           | c.3211      | 0.023083407 | 0     | 1 |
| 2860 | PKN1     | ENST00000342216 | p.V134M            | c.400       | 0.43951978  | 2.186 | 1 |
| 2860 | PKN1     | ENST00000342216 | p.A193V            | c.578       | 1.21975989  | 0     | 2 |
| 2861 | RCC1     | ENST00000373831 | p.R351W            | c.1051      | 0.024586326 | 5.346 | 1 |
| 2861 | RCC1     | ENST00000373831 | p.Q302H            | c.906       | 0.024586326 | 0     | 1 |
| 2862 | ACTB     | ENST00000331789 | p.A220T            | c.658       | 0.021994248 | 0     | 1 |
| 2862 | ACTB     | ENST00000331789 | p.R254Q            | c.761       | 0.015517309 | 7.018 | 1 |
| 2862 | ACTB     | ENST00000331789 | p.K315in_frame_del | c.945_943   | 0.014278616 | 6.13  | 1 |
| 2863 | AKR7A2   | ENST00000235835 | p.V350A            | c.1049      | 0.022127741 | 6.498 | 1 |
| 2863 | AKR7A2   | ENST00000235835 | p.A202T            | c.604       | 1.018915308 | 0     | 2 |
| 2863 | AKR7A2   | ENST00000235835 | p.Y225C            | c.674       | 0.006815334 | 8.197 | 1 |
| 2863 | AKR7A2   | ENST00000235835 | p.R297P            | c.890       | 0.008887541 | 7.814 | 1 |
| 2864 | GP1BA    | ENST00000329125 | p.E197D            | c.591       | 0.010598471 | 0     | 1 |
| 2864 | GP1BA    | ENST00000329125 | p.P222T            | c.664       | 0.010598471 | 6.56  | 1 |
| 2865 | KIF5B    | ENST00000302418 | p.N78H             | c.232       | 0.038393343 | 4.703 | 1 |
| 2865 | KIF5B    | ENST00000302418 | p.V329A            | c.986       | 0.038393343 | 0     | 1 |
| 2866 | HHIP     | ENST00000296575 | p.R241H            | c.722       | 0.267944757 | 2.923 | 1 |
| 2866 | HHIP     | ENST00000296575 | p.I253T            | c.758       | 0.068540846 | 4.959 | 1 |
| 2866 | HHIP     | ENST00000296575 | p.P331L            | c.992       | 1.164003624 | 0     | 2 |
| 2867 | GRB7     | ENST00000445327 | p.S460P            | c.1378      | 0.096388177 | 0     | 1 |
| 2867 | GRB7     | ENST00000445327 | p.E510A            | c.1529      | 0.096388177 | 3.375 | 1 |
| 2868 | ING5     | ENST00000313552 | p.D203N            | c.607       | 0.142003658 | 2.816 | 1 |
| 2868 | ING5     | ENST00000313552 | p.W227R            | c.679       | 0.142003658 | 0     | 1 |
| 2869 | ZMPSTE24 | ENST00000372759 | p.Y218H            | c.652       | 0.006939272 | 7.171 | 1 |
| 2869 | ZMPSTE24 | ENST00000372759 | p.T250M            | c.749       | 0.074428553 | 3.748 | 1 |
| 2869 | ZMPSTE24 | ENST00000372759 | p.R276Q            | c.827       | 0.081367825 | 0     | 1 |
| 2870 | CTSS     | ENST00000368985 | p.R103K            | c.308       | 0.011573748 | 6.433 | 1 |
| 2870 | CTSS     | ENST00000368985 | p.T228I            | c.683       | 0.011573748 | 0     | 1 |
| 2871 | HDC      | ENST00000267845 | p.D395N            | c.1183      | 0.156366135 | 0     | 1 |
| 2871 | HDC      | ENST00000267845 | p.R468Q            | c.1403      | 0.156366135 | 2.677 | 1 |
| 2872 | AGTR1    | ENST00000404754 | p.M334I            | c.1002      | 0.10036135  | 3.339 | 1 |
| 2872 | AGTR1    | ENST00000404754 | p.A225G            | c.674       | 0.114383792 | 0     | 1 |
| 2872 | AGTR1    | ENST00000404754 | p.L330F            | c.988       | 0.017097863 | 6.006 | 1 |
| 2873 | ABL1     | ENST00000372348 | p.M370T            | c.1109      | 0.162423464 | 4.672 | 1 |
| 2873 | ABL1     | ENST00000372348 | p.E472K            | c.1414      | 1.042521121 | 0     | 1 |
| 2873 | ABL1     | ENST00000372348 | p.E472Q            | c.1414      | 1.042521121 | 0     | 1 |
| 2873 | ABL1     | ENST00000372348 | p.K473in_frame_del | c.1415_1417 | 0.090556707 | 8.246 | 1 |
| 2874 | ENAH     | ENST00000284563 | p.V35F             | c.103       | 0.009398705 | 0     | 1 |
| 2874 | ENAH     | ENST00000284563 | p.G88D             | c.263       | 0.00544067  | 7.522 | 1 |



|      |          |                 |          |        |             |       |   |
|------|----------|-----------------|----------|--------|-------------|-------|---|
| 2874 | ENAH     | ENST00000284563 | p.A103V  | c.308  | 0.003958035 | 7.981 | 1 |
| 2875 | CHI3L1   | ENST00000255409 | p.A347V  | c.1040 | 0.01236152  | 0     | 1 |
| 2875 | CHI3L1   | ENST00000255409 | p.D199N  | c.595  | 0.01236152  | 6.338 | 1 |
| 2876 | SNRNP200 | ENST00000323853 | p.G1353R | c.4057 | 0.060329189 | 4.051 | 1 |
| 2876 | SNRNP200 | ENST00000323853 | p.G1689D | c.5066 | 0.060329189 | 0     | 1 |
| 2877 | SIRT5    | ENST00000606117 | p.A41G   | c.122  | 0.011897141 | 6.526 | 1 |
| 2877 | SIRT5    | ENST00000606117 | p.R44Q   | c.131  | 0.11225282  | 3.375 | 1 |
| 2877 | SIRT5    | ENST00000606117 | p.R119H  | c.356  | 0.02251551  | 9.637 | 1 |
| 2877 | SIRT5    | ENST00000606117 | p.A120T  | c.358  | 0.032697117 | 5.752 | 1 |
| 2877 | SIRT5    | ENST00000606117 | p.E299K  | c.895  | 0.127050963 | 0     | 1 |
| 2878 | GAMT     | ENST00000447102 | p.W174C  | c.522  | 0.011319861 | 6.465 | 1 |
| 2878 | GAMT     | ENST00000447102 | p.G175E  | c.524  | 0.004762715 | 7.714 | 1 |
| 2879 | KDM6A    | ENST00000382899 | p.N1158S | c.3473 | 0.158219574 | 2.66  | 1 |
| 2879 | KDM6A    | ENST00000382899 | p.R1262W | c.3784 | 0.158219574 | 0     | 1 |
| 2880 | ITGB6    | ENST00000283249 | p.E376Q  | c.1126 | 0.076292396 | 3.797 | 1 |
| 2880 | ITGB6    | ENST00000283249 | p.K404N  | c.1212 | 0.132397864 | 0     | 1 |
| 2880 | ITGB6    | ENST00000283249 | p.L497M  | c.1489 | 0.064804074 | 4.048 | 1 |
| 2881 | REG1A    | ENST00000233735 | p.A42D   | c.125  | 0.068630801 | 3.865 | 1 |
| 2881 | REG1A    | ENST00000233735 | p.F83I   | c.247  | 0.068630801 | 0     | 1 |
| 2882 | OXCT1    | ENST00000196371 | p.R355Q  | c.1064 | 0.082640913 | 3.597 | 1 |
| 2882 | OXCT1    | ENST00000196371 | p.T372N  | c.1115 | 0.010686995 | 6.548 | 1 |
| 2882 | OXCT1    | ENST00000196371 | p.L374F  | c.1120 | 0.004809158 | 7.7   | 1 |
| 2882 | OXCT1    | ENST00000196371 | p.R285Q  | c.854  | 0.098137065 | 0     | 1 |
| 2883 | ACLY     | ENST00000590151 | p.R66C   | c.196  | 0.317537746 | 2.655 | 1 |
| 2883 | ACLY     | ENST00000590151 | p.E8K    | c.22   | 1.158768873 | 0     | 1 |
| 2883 | ACLY     | ENST00000590151 | p.E8Q    | c.22   | 1.158768873 | 0     | 1 |
| 2884 | B3GAT2   | ENST00000230053 | p.D243N  | c.727  | 0.011849746 | 6.399 | 1 |
| 2884 | B3GAT2   | ENST00000230053 | p.L277V  | c.829  | 0.011849746 | 0     | 1 |
| 2885 | KLK4     | ENST00000598305 | p.R9Q    | c.26   | 0.274428665 | 2.941 | 1 |
| 2885 | KLK4     | ENST00000598305 | p.V2M    | c.4    | 0.032904414 | 6.078 | 1 |
| 2885 | KLK4     | ENST00000598305 | p.L22I   | c.64   | 0.209089585 | 3.432 | 1 |
| 2886 | DDR1     | ENST00000513240 | p.E361K  | c.1081 | 1.016630784 | 0     | 2 |
| 2886 | DDR1     | ENST00000513240 | p.G237W  | c.709  | 0.033261568 | 5.91  | 1 |
| 2887 | GCDH     | ENST00000591470 | p.R355H  | c.1064 | 0.054033577 | 0     | 1 |
| 2887 | GCDH     | ENST00000591470 | p.S119L  | c.356  | 0.054033577 | 4.21  | 1 |
| 2888 | PLG      | ENST00000308192 | p.T500M  | c.1499 | 0.021672359 | 0     | 1 |
| 2888 | PLG      | ENST00000308192 | p.C543Y  | c.1628 | 0.021672359 | 5.528 | 1 |
| 2889 | MAGI1    | ENST00000402939 | p.P492L  | c.1475 | 0.508147407 | 2.189 | 1 |
| 2889 | MAGI1    | ENST00000402939 | p.L528V  | c.1582 | 0.100041625 | 6.035 | 1 |
| 2889 | MAGI1    | ENST00000402939 | p.T531A  | c.1591 | 1.234553883 | 0     | 1 |
| 2889 | MAGI1    | ENST00000402939 | p.T531K  | c.1592 | 1.234553883 | 0     | 1 |
| 2890 | UGDH     | ENST00000316423 | p.I455T  | c.1364 | 0.008584799 | 0     | 1 |
| 2890 | UGDH     | ENST00000316423 | p.F2L    | c.4    | 0.008584799 | 6.864 | 1 |
| 2891 | MGAM     | ENST00000475668 | p.P1222S | c.3664 | 0.017169164 | 8.662 | 1 |
| 2891 | MGAM     | ENST00000475668 | p.R2531W | c.7591 | 0.037354599 | 6.09  | 1 |
| 2891 | MGAM     | ENST00000475668 | p.E2536Q | c.7606 | 0.211843934 | 2.574 | 1 |
| 2891 | MGAM     | ENST00000475668 | p.A2555V | c.7664 | 0.281404566 | 2.775 | 1 |
| 2891 | MGAM     | ENST00000475668 | p.H2606Y | c.7816 | 0.133114011 | 6.251 | 1 |
| 2891 | MGAM     | ENST00000475668 | p.R2608C | c.7822 | 0.344313786 | 0     | 1 |

|      |          |                 |          |        |             |       |   |
|------|----------|-----------------|----------|--------|-------------|-------|---|
| 2892 | CXCL5    | ENST00000296027 | p.I63S   | c.188  | 0.200406332 | 0     | 1 |
| 2892 | CXCL5    | ENST00000296027 | p.L84P   | c.251  | 0.200406332 | 2.319 | 1 |
| 2893 | P2RY12   | ENST00000302632 | p.A46T   | c.136  | 0.244441806 | 2.49  | 1 |
| 2893 | P2RY12   | ENST00000302632 | p.M47I   | c.141  | 0.219185013 | 2.669 | 1 |
| 2893 | P2RY12   | ENST00000302632 | p.I53T   | c.158  | 0.288391616 | 2.211 | 1 |
| 2893 | P2RY12   | ENST00000302632 | p.M312V  | c.934  | 0.551226443 | 0     | 1 |
| 2894 | AR       | ENST00000374690 | p.L729I  | c.2185 | 0.163129963 | 0     | 1 |
| 2894 | AR       | ENST00000374690 | p.F814V  | c.2440 | 0.076147675 | 3.844 | 1 |
| 2894 | AR       | ENST00000374690 | p.F828L  | c.2482 | 0.100003432 | 3.419 | 1 |
| 2895 | FCN1     | ENST00000371806 | p.C111S  | c.332  | 0.025155192 | 0     | 1 |
| 2895 | FCN1     | ENST00000371806 | p.E228K  | c.682  | 0.025155192 | 5.313 | 1 |
| 2896 | PDE8A    | ENST00000394553 | p.D563V  | c.1688 | 0.025648175 | 5.285 | 1 |
| 2896 | PDE8A    | ENST00000394553 | p.A725V  | c.2174 | 0.025648175 | 0     | 1 |
| 2897 | GRM7     | ENST00000467425 | p.Q337E  | c.1009 | 0.05147523  | 0     | 1 |
| 2897 | GRM7     | ENST00000467425 | p.Q205H  | c.615  | 0.025594897 | 5.288 | 1 |
| 2897 | GRM7     | ENST00000467425 | p.G312R  | c.934  | 0.025880333 | 5.272 | 1 |
| 2898 | ALDH18A1 | ENST00000371224 | p.R456H  | c.1367 | 0.015303442 | 6.03  | 1 |
| 2898 | ALDH18A1 | ENST00000371224 | p.L787I  | c.2359 | 0.015303442 | 0     | 1 |
| 2899 | HDAC4    | ENST00000345617 | p.K958N  | c.2874 | 0.018853811 | 0     | 1 |
| 2899 | HDAC4    | ENST00000345617 | p.E996D  | c.2988 | 0.018853811 | 5.729 | 1 |
| 2900 | PHKG2    | ENST00000328273 | p.E114K  | c.340  | 0.109045179 | 3.265 | 1 |
| 2900 | PHKG2    | ENST00000328273 | p.E157K  | c.469  | 0.152285788 | 0     | 1 |
| 2900 | PHKG2    | ENST00000328273 | p.Y193H  | c.577  | 0.059896481 | 4.373 | 1 |
| 2901 | TRIM41   | ENST00000315073 | p.E239K  | c.715  | 0.171347851 | 0     | 1 |
| 2901 | TRIM41   | ENST00000315073 | p.V260M  | c.778  | 0.171347851 | 2.545 | 1 |
| 2902 | DNMT1    | ENST00000359526 | p.F1312L | c.3934 | 0.057193698 | 4.128 | 1 |
| 2902 | DNMT1    | ENST00000359526 | p.V1359M | c.4075 | 0.057193698 | 0     | 1 |
| 2903 | KCNU1    | ENST00000399881 | p.F348L  | c.1044 | 0.011816937 | 6.403 | 1 |
| 2903 | KCNU1    | ENST00000399881 | p.R350K  | c.1049 | 0.008602669 | 6.861 | 1 |
| 2903 | KCNU1    | ENST00000399881 | p.S908Y  | c.2723 | 0.020419606 | 0     | 1 |
| 2904 | SI       | ENST00000264382 | p.S727N  | c.2180 | 0.013696964 | 7.19  | 1 |
| 2904 | SI       | ENST00000264382 | p.R250C  | c.748  | 1.006848482 | 0     | 2 |
| 2905 | HNMT     | ENST00000280097 | p.D180E  | c.540  | 0.014659706 | 6.092 | 1 |
| 2905 | HNMT     | ENST00000280097 | p.S201T  | c.601  | 0.027626809 | 0     | 1 |
| 2905 | HNMT     | ENST00000280097 | p.L285V  | c.853  | 0.012967103 | 6.269 | 1 |
| 2906 | AMPH     | ENST00000356264 | p.R149C  | c.445  | 1.011265069 | 0     | 1 |
| 2906 | AMPH     | ENST00000356264 | p.R149H  | c.446  | 1.011265069 | 0     | 1 |
| 2906 | AMPH     | ENST00000356264 | p.A176T  | c.526  | 0.022530139 | 6.472 | 1 |
| 2907 | CR1      | ENST00000367052 | p.F1320L | c.3960 | 0.045112661 | 0     | 1 |
| 2907 | CR1      | ENST00000367052 | p.G1376E | c.4127 | 0.006479059 | 7.27  | 1 |
| 2907 | CR1      | ENST00000367052 | p.G1378R | c.4132 | 0.038633602 | 4.694 | 1 |
| 2908 | PNLIPRP1 | ENST00000358834 | p.F230L  | c.690  | 0.062916332 | 5.057 | 1 |
| 2908 | PNLIPRP1 | ENST00000358834 | p.L231V  | c.691  | 0.084086711 | 4.061 | 1 |
| 2908 | PNLIPRP1 | ENST00000358834 | p.A259V  | c.776  | 0.091292381 | 0     | 1 |
| 2908 | PNLIPRP1 | ENST00000358834 | p.S261F  | c.782  | 0.054792216 | 9.543 | 1 |
| 2909 | GSTM2    | ENST00000369831 | p.R96C   | c.286  | 0.069444296 | 3.848 | 1 |
| 2909 | GSTM2    | ENST00000369831 | p.L149I  | c.445  | 0.069444296 | 0     | 1 |
| 2910 | PRLR     | ENST00000382002 | p.H65Y   | c.193  | 0.100362157 | 3.414 | 1 |
| 2910 | PRLR     | ENST00000382002 | p.E67K   | c.199  | 0.071488332 | 4.83  | 1 |

|               |                 |          |        |             |       |   |
|---------------|-----------------|----------|--------|-------------|-------|---|
| 2910 PRLR     | ENST00000382002 | p.Y99S   | c.296  | 0.16357754  | 0     | 1 |
| 2910 PRLR     | ENST00000382002 | p.D120E  | c.360  | 0.070880105 | 4.853 | 1 |
| 2911 ACE      | ENST00000290866 | p.R482C  | c.1444 | 2.082177159 | 0     | 2 |
| 2911 ACE      | ENST00000290866 | p.R482H  | c.1445 | 2.082177159 | 0     | 1 |
| 2911 ACE      | ENST00000290866 | p.R487H  | c.1460 | 0.229798563 | 9.595 | 1 |
| 2911 ACE      | ENST00000290866 | p.E241K  | c.721  | 0.26199493  | 3.628 | 1 |
| 2912 IL34     | ENST00000288098 | p.S65N   | c.194  | 0.174552363 | 0     | 1 |
| 2912 IL34     | ENST00000288098 | p.S104L  | c.311  | 0.072079847 | 3.936 | 1 |
| 2912 IL34     | ENST00000288098 | p.D107N  | c.319  | 0.005982648 | 7.385 | 1 |
| 2912 IL34     | ENST00000288098 | p.K157M  | c.470  | 0.109979548 | 3.276 | 1 |
| 2913 RBFOX2   | ENST00000438146 | p.K182N  | c.546  | 0.099098017 | 3.335 | 1 |
| 2913 RBFOX2   | ENST00000438146 | p.D235Y  | c.703  | 0.099098017 | 0     | 1 |
| 2914 DDC      | ENST00000444124 | p.V184A  | c.551  | 0.107544079 | 3.217 | 1 |
| 2914 DDC      | ENST00000444124 | p.P236S  | c.706  | 0.107544079 | 0     | 1 |
| 2915 FURIN    | ENST00000268171 | p.L428V  | c.1282 | 0.023552108 | 5.408 | 1 |
| 2915 FURIN    | ENST00000268171 | p.R130L  | c.389  | 0.023552108 | 0     | 1 |
| 2916 SNRNP200 | ENST00000323853 | p.S1230I | c.3689 | 0.037085525 | 0     | 1 |
| 2916 SNRNP200 | ENST00000323853 | p.R1269Q | c.3806 | 0.037085525 | 4.753 | 1 |
| 2917 DYRK2    | ENST00000344096 | p.T117R  | c.350  | 0.180391159 | 2.6   | 1 |
| 2917 DYRK2    | ENST00000344096 | p.M143V  | c.427  | 0.213974995 | 0     | 1 |
| 2917 DYRK2    | ENST00000344096 | p.R221S  | c.663  | 0.064489177 | 4.35  | 1 |
| 2919 MAPK7    | ENST00000308406 | p.R335H  | c.1004 | 1.066661611 | 0     | 2 |
| 2919 MAPK7    | ENST00000308406 | p.A229V  | c.686  | 0.144713921 | 3.907 | 1 |
| 2920 CUL1     | ENST00000602748 | p.V204I  | c.610  | 0.009297123 | 0     | 1 |
| 2920 CUL1     | ENST00000602748 | p.H280Y  | c.838  | 0.009297123 | 6.749 | 1 |
| 2921 GRM3     | ENST00000361669 | p.D461H  | c.1381 | 0.045280821 | 8.311 | 1 |
| 2921 GRM3     | ENST00000361669 | p.G462R  | c.1384 | 1.083920813 | 0     | 2 |
| 2921 GRM3     | ENST00000361669 | p.V191M  | c.571  | 0.200527403 | 3.63  | 1 |
| 2922 PARK2    | ENST00000366898 | p.D464N  | c.1390 | 0.115962246 | 3.505 | 1 |
| 2922 PARK2    | ENST00000366898 | p.S145N  | c.434  | 0.174710049 | 0     | 1 |
| 2922 PARK2    | ENST00000366898 | p.I229F  | c.685  | 0.059445287 | 4.238 | 1 |
| 2922 PARK2    | ENST00000366898 | p.A230T  | c.688  | 0.058626623 | 4.894 | 1 |
| 2923 VCP      | ENST00000358901 | p.R93C   | c.277  | 0.027508094 | 5.184 | 1 |
| 2923 VCP      | ENST00000358901 | p.E192Q  | c.574  | 0.04915043  | 0     | 1 |
| 2923 VCP      | ENST00000358901 | p.P227T  | c.679  | 0.021642335 | 5.53  | 1 |
| 2924 KLK4     | ENST00000598305 | p.A43V   | c.128  | 0.007515058 | 7.056 | 1 |
| 2925 AOC1     | ENST00000416793 | p.T68S   | c.203  | 0.007758535 | 0     | 1 |
| 2925 AOC1     | ENST00000416793 | p.T112I  | c.335  | 0.007758535 | 7.01  | 1 |
| 2926 TRIM29   | ENST00000341846 | p.F235C  | c.704  | 0.121666172 | 3.039 | 1 |
| 2926 TRIM29   | ENST00000341846 | p.T257I  | c.770  | 0.121666172 | 0     | 1 |
| 2927 LIFR     | ENST00000263409 | p.P364T  | c.1090 | 0.010221991 | 9.909 | 1 |
| 2927 LIFR     | ENST00000263409 | p.R365H  | c.1094 | 0.133608728 | 0     | 1 |
| 2927 LIFR     | ENST00000263409 | p.S310T  | c.929  | 0.015525893 | 6.164 | 1 |
| 2927 LIFR     | ENST00000263409 | p.V326I  | c.976  | 0.005339795 | 7.549 | 1 |
| 2927 LIFR     | ENST00000263409 | p.F328V  | c.982  | 0.124044435 | 3.142 | 1 |
| 2928 TRAF6    | ENST00000348124 | p.P423L  | c.1268 | 0.022498927 | 5.474 | 1 |
| 2928 TRAF6    | ENST00000348124 | p.R502S  | c.1504 | 0.022498927 | 0     | 1 |
| 2929 RPL13    | ENST00000567815 | p.S97Y   | c.290  | 0.003370083 | 8.213 | 1 |
| 2929 RPL13    | ENST00000567815 | p.V154A  | c.461  | 0.003370083 | 0     | 1 |

|              |                 |         |           |             |       |   |
|--------------|-----------------|---------|-----------|-------------|-------|---|
| 2930 LIMK1   | ENST00000418310 | p.S493F | c.1478    | 0.065698307 | 0     | 1 |
| 2930 LIMK1   | ENST00000418310 | p.V568I | c.1702    | 0.065698307 | 3.928 | 1 |
| 2931 RB1     | ENST00000267163 | p.M379L | c.1135    | 0.054695593 | 6.384 | 1 |
| 2931 RB1     | ENST00000267163 | p.Y659F | c.1976    | 0.107430937 | 0     | 1 |
| 2931 RB1     | ENST00000267163 | p.I782M | c.2346    | 0.096600311 | 3.389 | 1 |
| 2932 CYP11B2 | ENST00000323110 | p.G46D  | c.137     | 0.007699604 | 7.021 | 1 |
| 2932 CYP11B2 | ENST00000323110 | p.T71I  | c.213_212 | 0.007699604 | 0     | 1 |
| 2933 ANK1    | ENST00000396942 | p.L556Q | c.1667    | 0.011010318 | 6.505 | 1 |
| 2933 ANK1    | ENST00000396942 | p.G592A | c.1775    | 0.011010318 | 0     | 1 |
| 2934 FYN     | ENST00000368667 | p.S451F | c.1352    | 0.091632297 | 3.448 | 1 |
| 2934 FYN     | ENST00000368667 | p.T512N | c.1535    | 0.091632297 | 0     | 1 |
| 2935 ROBO2   | ENST00000332191 | p.A559V | c.1676    | 0.214641359 | 2.22  | 1 |
| 2935 ROBO2   | ENST00000332191 | p.A597V | c.1790    | 0.214641359 | 0     | 1 |
| 2936 AQP6    | ENST00000315520 | p.A84V  | c.251_252 | 0.065743861 | 3.927 | 1 |
| 2936 AQP6    | ENST00000315520 | p.A224T | c.670     | 0.065743861 | 0     | 1 |
| 2937 ACOT13  | ENST00000230048 | p.L96I  | c.286     | 0.00541809  | 0     | 1 |
| 2937 ACOT13  | ENST00000230048 | p.T125R | c.374     | 0.00541809  | 7.528 | 1 |
| 2938 FBP1    | ENST00000375326 | p.R111K | c.332     | 0.023980408 | 5.382 | 1 |
| 2938 FBP1    | ENST00000375326 | p.R141I | c.422     | 0.023980408 | 0     | 1 |
| 2939 XRCC4   | ENST00000338635 | p.L36P  | c.107     | 0.015871185 | 6.712 | 1 |
| 2939 XRCC4   | ENST00000338635 | p.R7I   | c.20      | 0.020336707 | 6.158 | 1 |
| 2939 XRCC4   | ENST00000338635 | p.F86L  | c.256     | 0.029484135 | 0     | 1 |
| 2939 XRCC4   | ENST00000338635 | p.G109V | c.326     | 0.005941323 | 7.395 | 1 |
| 2940 IL2RA   | ENST00000379959 | p.A34T  | c.100     | 0.013859605 | 7.53  | 1 |
| 2940 IL2RA   | ENST00000379959 | p.R56H  | c.167     | 0.070700319 | 0     | 1 |
| 2940 IL2RA   | ENST00000379959 | p.S84N  | c.251     | 0.065289735 | 3.937 | 1 |
| 2941 SOS1    | ENST00000426016 | p.N233Y | c.697     | 3.008379036 | 0     | 4 |
| 2941 SOS1    | ENST00000426016 | p.I327V | c.979     | 0.033516144 | 6.899 | 1 |
| 2942 SBDS    | ENST00000246868 | p.A136V | c.407     | 1.182504001 | 0     | 2 |
| 2942 SBDS    | ENST00000246868 | p.M165I | c.495     | 0.365008003 | 2.454 | 1 |
| 2943 NR4A2   | ENST00000539077 | p.S496F | c.1487    | 0.004041201 | 0     | 1 |
| 2943 NR4A2   | ENST00000539077 | p.G580W | c.1738    | 0.004041201 | 7.951 | 1 |
| 2944 HBE1    | ENST00000380237 | p.E7K   | c.19      | 0.005762857 | 7.439 | 1 |
| 2944 HBE1    | ENST00000380237 | p.I76T  | c.227     | 0.005835209 | 7.421 | 1 |
| 2944 HBE1    | ENST00000380237 | p.K133N | c.399     | 0.011598066 | 0     | 1 |
| 2945 GTF2B   | ENST00000370500 | p.R248K | c.743     | 1.092837062 | 0     | 1 |
| 2945 GTF2B   | ENST00000370500 | p.R248M | c.743     | 1.092837062 | 0     | 1 |
| 2945 GTF2B   | ENST00000370500 | p.A256S | c.766     | 0.278351198 | 5.788 | 1 |
| 2945 GTF2B   | ENST00000370500 | p.S288P | c.862     | 0.391632022 | 3.742 | 1 |
| 2946 SULT2A1 | ENST00000222002 | p.T85A  | c.253     | 0.016968467 | 0     | 1 |
| 2946 SULT2A1 | ENST00000222002 | p.F18L  | c.54      | 0.016968467 | 5.881 | 1 |
| 2947 CDC37   | ENST00000222005 | p.E184K | c.550     | 0.04258798  | 0     | 1 |
| 2947 CDC37   | ENST00000222005 | p.Q217P | c.650     | 0.023324662 | 5.422 | 1 |
| 2947 CDC37   | ENST00000222005 | p.R231W | c.691     | 0.019263318 | 5.698 | 1 |
| 2948 PARP12  | ENST00000263549 | p.G565S | c.1693    | 0.109348096 | 3.193 | 1 |
| 2948 PARP12  | ENST00000263549 | p.S608R | c.1824    | 0.109348096 | 0     | 1 |
| 2949 GSTO1   | ENST00000369713 | p.L157P | c.470     | 0.018478609 | 0     | 1 |
| 2949 GSTO1   | ENST00000369713 | p.K200T | c.599     | 0.018478609 | 5.758 | 1 |
| 2950 FGF1    | ENST00000359370 | p.T111P | c.331     | 0.029787799 | 5.95  | 1 |

|      |         |                 |          |        |             |       |   |
|------|---------|-----------------|----------|--------|-------------|-------|---|
| 2950 | FGF1    | ENST00000359370 | p.L148F  | c.442  | 0.181916734 | 0     | 1 |
| 2950 | FGF1    | ENST00000359370 | p.L29I   | c.85   | 0.179352504 | 2.593 | 1 |
| 2951 | AKT1    | ENST00000402615 | p.W80R   | c.238  | 0.085976651 | 0     | 1 |
| 2951 | AKT1    | ENST00000402615 | p.V201I  | c.601  | 0.044359358 | 4.556 | 1 |
| 2951 | AKT1    | ENST00000402615 | p.T211I  | c.632  | 0.04531283  | 4.524 | 1 |
| 2952 | PNLIP   | ENST00000369221 | p.T221K  | c.662  | 0.11486411  | 0     | 1 |
| 2952 | PNLIP   | ENST00000369221 | p.N279Y  | c.835  | 0.11486411  | 3.122 | 1 |
| 2953 | USP7    | ENST00000344836 | p.E663K  | c.1987 | 0.141218402 | 2.824 | 1 |
| 2953 | USP7    | ENST00000344836 | p.H704Y  | c.2110 | 0.141218402 | 0     | 1 |
| 2954 | GSN     | ENST00000373818 | p.D472Y  | c.1414 | 0.125782228 | 2.991 | 1 |
| 2954 | GSN     | ENST00000373818 | p.R553H  | c.1658 | 0.125782228 | 0     | 1 |
| 2955 | FARSB   | ENST00000281828 | p.V6M    | c.16   | 0.01574373  | 8.586 | 1 |
| 2955 | FARSB   | ENST00000281828 | p.V67I   | c.199  | 0.153015173 | 0     | 1 |
| 2955 | FARSB   | ENST00000281828 | p.P2L    | c.5    | 0.150412878 | 2.733 | 1 |
| 2956 | TYK2    | ENST00000264818 | p.Q1102H | c.3306 | 0.027718635 | 5.173 | 1 |
| 2956 | TYK2    | ENST00000264818 | p.R1136W | c.3406 | 0.027718635 | 0     | 1 |
| 2957 | IMPDH1  | ENST00000338791 | p.K460N  | c.1380 | 0.009074287 | 7.784 | 1 |
| 2957 | IMPDH1  | ENST00000338791 | p.R565W  | c.1693 | 1.037821775 | 0     | 1 |
| 2957 | IMPDH1  | ENST00000338791 | p.R565Q  | c.1694 | 1.037821775 | 0     | 1 |
| 2957 | IMPDH1  | ENST00000338791 | p.T137N  | c.410  | 0.066569263 | 4.909 | 1 |
| 2958 | SI      | ENST00000264382 | p.E171G  | c.512  | 0.007845059 | 0     | 1 |
| 2958 | SI      | ENST00000264382 | p.N298S  | c.893  | 0.007845059 | 6.994 | 1 |
| 2959 | TCERG1  | ENST00000296702 | p.D1018V | c.3053 | 0.078454499 | 3.672 | 1 |
| 2959 | TCERG1  | ENST00000296702 | p.R1056Q | c.3167 | 0.078454499 | 0     | 1 |
| 2960 | KIT     | ENST00000288135 | p.P37A   | c.109  | 0.009813612 | 6.671 | 1 |
| 2960 | KIT     | ENST00000288135 | p.V64G   | c.191  | 0.011694711 | 6.418 | 1 |
| 2960 | KIT     | ENST00000288135 | p.G102S  | c.304  | 0.021508323 | 0     | 1 |
| 2961 | SORD    | ENST00000267814 | p.M66V   | c.196  | 0.131944215 | 2.922 | 1 |
| 2961 | SORD    | ENST00000267814 | p.E95K   | c.283  | 0.006606033 | 7.242 | 1 |
| 2961 | SORD    | ENST00000267814 | p.D125N  | c.373  | 0.138550248 | 0     | 1 |
| 2962 | RWDD3   | ENST00000370202 | p.P62S   | c.184  | 0.255607133 | 1.968 | 1 |
| 2962 | RWDD3   | ENST00000370202 | p.S96P   | c.286  | 0.255607133 | 0     | 1 |
| 2963 | DPYSL5  | ENST00000288699 | p.A76S   | c.226  | 0.009271381 | 6.753 | 1 |
| 2963 | DPYSL5  | ENST00000288699 | p.P328S  | c.982  | 0.009271381 | 0     | 1 |
| 2964 | IL13RA1 | ENST00000371666 | p.L38V   | c.112  | 0.026455144 | 5.434 | 1 |
| 2964 | IL13RA1 | ENST00000371666 | p.H69N   | c.205  | 0.147010542 | 2.799 | 1 |
| 2964 | IL13RA1 | ENST00000371666 | p.Q97K   | c.289  | 0.166818314 | 0     | 1 |
| 2965 | TYK2    | ENST00000264818 | p.Y376C  | c.1127 | 0.077079511 | 3.86  | 1 |
| 2965 | TYK2    | ENST00000264818 | p.L403M  | c.1207 | 0.066273062 | 4.091 | 1 |
| 2965 | TYK2    | ENST00000264818 | p.V420L  | c.1258 | 0.068260252 | 4.046 | 1 |
| 2965 | TYK2    | ENST00000264818 | p.I324M  | c.972  | 0.188087191 | 0     | 1 |
| 2967 | CD38    | ENST00000226279 | p.Y106C  | c.317  | 0.025347724 | 5.302 | 1 |
| 2967 | CD38    | ENST00000226279 | p.N183I  | c.548  | 0.025347724 | 0     | 1 |
| 2968 | PC      | ENST00000393958 | p.F660I  | c.1978 | 0.014802657 | 6.078 | 1 |
| 2968 | PC      | ENST00000393958 | p.G953C  | c.2857 | 0.014538276 | 6.104 | 1 |
| 2968 | PC      | ENST00000393958 | p.R977W  | c.2929 | 0.029340933 | 0     | 1 |
| 2969 | KMT2A   | ENST00000534358 | p.K1574R | c.4721 | 0.236842518 | 0     | 1 |
| 2969 | KMT2A   | ENST00000534358 | p.H1596Y | c.4786 | 0.236842518 | 2.078 | 1 |
| 2970 | GLRX3   | ENST00000481034 | p.M249I  | c.747  | 0.05695633  | 4.134 | 1 |

|      |           |                 |          |             |             |       |   |
|------|-----------|-----------------|----------|-------------|-------------|-------|---|
| 2970 | GLRX3     | ENST00000481034 | p.T280I  | c.839       | 0.05695633  | 0     | 1 |
| 2971 | PSMD7     | ENST00000219313 | p.V35G   | c.104       | 0.020731955 | 0     | 1 |
| 2971 | PSMD7     | ENST00000219313 | p.V56A   | c.167       | 0.020731955 | 5.592 | 1 |
| 2972 | BROX      | ENST00000340934 | p.A371T  | c.1111      | 0.006838995 | 7.192 | 1 |
| 2972 | BROX      | ENST00000340934 | p.G26D   | c.77        | 0.006838995 | 0     | 1 |
| 2973 | SERPINA10 | ENST00000261994 | p.E150D  | c.450       | 0.033936933 | 0     | 1 |
| 2973 | SERPINA10 | ENST00000261994 | p.R184K  | c.551       | 0.033936933 | 4.881 | 1 |
| 2974 | GRIA2     | ENST00000296526 | p.K95T   | c.284       | 0.012788581 | 0     | 1 |
| 2974 | GRIA2     | ENST00000296526 | p.G120A  | c.359       | 0.012788581 | 6.289 | 1 |
| 2975 | NF2       | ENST00000432151 | p.D86G   | c.257       | 0.00626704  | 7.318 | 1 |
| 2976 | LINGO1    | ENST00000355300 | p.A502T  | c.1504      | 0.057887495 | 5.676 | 1 |
| 2976 | LINGO1    | ENST00000355300 | p.V110M  | c.328       | 0.090086396 | 3.611 | 1 |
| 2976 | LINGO1    | ENST00000355300 | p.P135L  | c.404       | 0.101402159 | 0     | 1 |
| 2977 | CD180     | ENST00000256447 | p.P578T  | c.1732      | 0.004250947 | 0     | 1 |
| 2977 | CD180     | ENST00000256447 | p.L618P  | c.1853      | 0.004250947 | 7.878 | 1 |
| 2978 | BMPR2     | ENST00000374580 | p.E415Q  | c.1243      | 0.004703662 | 7.732 | 1 |
| 2978 | BMPR2     | ENST00000374580 | p.S301A  | c.901       | 0.004703662 | 0     | 1 |
| 2979 | SEC24C    | ENST00000345254 | p.V859I  | c.2575      | 0.018123432 | 0     | 1 |
| 2979 | SEC24C    | ENST00000345254 | p.R928H  | c.2783      | 0.018123432 | 5.786 | 1 |
| 2980 | EHMT1     | ENST00000460843 | p.A1126T | c.3376      | 0.0217476   | 0     | 1 |
| 2980 | EHMT1     | ENST00000460843 | p.T1150F | c.3448_3449 | 0.0217476   | 5.523 | 1 |
| 2981 | SH3GL2    | ENST00000380607 | p.D291N  | c.871       | 0.003985565 | 0     | 1 |
| 2981 | SH3GL2    | ENST00000380607 | p.I316T  | c.947       | 0.003985565 | 7.971 | 1 |
| 2982 | C3        | ENST00000245907 | p.R343H  | c.1028      | 0.183413008 | 8.272 | 1 |
| 2982 | C3        | ENST00000245907 | p.E237K  | c.709       | 0.20552129  | 5.663 | 1 |
| 2982 | C3        | ENST00000245907 | p.V326M  | c.976       | 1.022971405 | 0     | 2 |
| 2983 | P2RY11    | ENST00000321826 | p.V117L  | c.349       | 0.056016669 | 4.158 | 1 |
| 2983 | P2RY11    | ENST00000321826 | p.P217L  | c.650       | 0.056016669 | 0     | 1 |
| 2984 | RAB7A     | ENST00000265062 | p.F96C   | c.287       | 0.105838824 | 0     | 1 |
| 2984 | RAB7A     | ENST00000265062 | p.A135S  | c.403       | 0.017268929 | 5.98  | 1 |
| 2984 | RAB7A     | ENST00000265062 | p.R138Q  | c.413       | 0.09142152  | 3.474 | 1 |
| 2985 | IFNB1     | ENST00000380232 | p.F36S   | c.107       | 0.013519369 | 6.332 | 1 |
| 2985 | IFNB1     | ENST00000380232 | p.Q37K   | c.109       | 0.090232939 | 3.488 | 1 |
| 2985 | IFNB1     | ENST00000380232 | p.N111K  | c.333       | 0.101539645 | 0     | 1 |
| 2986 | PIK3C3    | ENST00000262039 | p.R810Q  | c.2429      | 0.249060694 | 0     | 1 |
| 2986 | PIK3C3    | ENST00000262039 | p.R847C  | c.2539      | 0.185742581 | 2.535 | 1 |
| 2986 | PIK3C3    | ENST00000262039 | p.S851L  | c.2552      | 0.089723937 | 3.708 | 1 |
| 2987 | C6        | ENST00000263413 | p.E394K  | c.1180      | 0.030616365 | 0     | 1 |
| 2987 | C6        | ENST00000263413 | p.T252R  | c.755       | 0.012073602 | 6.372 | 1 |
| 2987 | C6        | ENST00000263413 | p.F254L  | c.762       | 0.018542762 | 5.753 | 1 |
| 2988 | ACAD11    | ENST00000264990 | p.A470T  | c.1408      | 0.025005061 | 5.617 | 1 |
| 2988 | ACAD11    | ENST00000264990 | p.C503S  | c.1508      | 0.025990199 | 5.916 | 1 |
| 2988 | ACAD11    | ENST00000264990 | p.R627H  | c.1880      | 0.036937555 | 0     | 1 |
| 2990 | TRNT1     | ENST00000251607 | p.D338Y  | c.1012      | 0.003431369 | 8.187 | 1 |
| 2990 | TRNT1     | ENST00000251607 | p.C373S  | c.1118      | 0.003431369 | 0     | 1 |
| 2991 | MLST8     | ENST00000564088 | p.R25G   | c.73        | 0.221900514 | 0     | 1 |
| 2991 | MLST8     | ENST00000564088 | p.H311Y  | c.931       | 0.113968082 | 3.297 | 1 |
| 2991 | MLST8     | ENST00000564088 | p.Q312R  | c.935       | 0.1323828   | 3.057 | 1 |
| 2992 | GALNT2    | ENST00000366672 | p.D494E  | c.1482      | 0.176174446 | 4.223 | 1 |

|               |                 |         |        |             |       |   |
|---------------|-----------------|---------|--------|-------------|-------|---|
| 2992 GALNT2   | ENST00000366672 | p.A266P | c.796  | 2.053548872 | 0     | 1 |
| 2992 GALNT2   | ENST00000366672 | p.A266T | c.796  | 2.053548872 | 0     | 1 |
| 2992 GALNT2   | ENST00000366672 | p.A266V | c.797  | 2.053548872 | 0     | 1 |
| 2993 RAP1B    | ENST00000250559 | p.E54G  | c.161  | 0.058638825 | 4.092 | 1 |
| 2993 RAP1B    | ENST00000250559 | p.E54G  | c.161  | 0.065019833 | 0     | 1 |
| 2993 RAP1B    | ENST00000250559 | p.R2C   | c.4    | 0.006381008 | 7.292 | 1 |
| 2994 CA1      | ENST00000523022 | p.T56A  | c.166  | 0.039797612 | 5.386 | 1 |
| 2994 CA1      | ENST00000523022 | p.F71V  | c.211  | 0.088926904 | 3.542 | 1 |
| 2994 CA1      | ENST00000523022 | p.Q159K | c.475  | 0.026751226 | 6.393 | 1 |
| 2994 CA1      | ENST00000523022 | p.F180C | c.539  | 0.121665407 | 0     | 1 |
| 2995 RPS7     | ENST00000304921 | p.E138K | c.412  | 1.003540086 | 0     | 2 |
| 2995 RPS7     | ENST00000304921 | p.P190Q | c.569  | 0.007080171 | 8.142 | 1 |
| 2996 PEX19    | ENST00000368072 | p.K217Q | c.649  | 1.005444442 | 0     | 1 |
| 2996 PEX19    | ENST00000368072 | p.K217N | c.651  | 1.005444442 | 0     | 1 |
| 2996 PEX19    | ENST00000368072 | p.P264H | c.791  | 0.010888885 | 7.521 | 1 |
| 2997 EPO      | ENST00000252723 | p.T54M  | c.161  | 0.381103573 | 2.477 | 1 |
| 2997 EPO      | ENST00000252723 | p.A57T  | c.169  | 0.265369596 | 3.038 | 1 |
| 2997 EPO      | ENST00000252723 | p.R166H | c.497  | 1.301368056 | 0     | 2 |
| 2998 NAT2     | ENST00000286479 | p.R165K | c.494  | 0.019276675 | 5.697 | 1 |
| 2998 NAT2     | ENST00000286479 | p.F244L | c.730  | 0.019276675 | 0     | 1 |
| 2999 FECH     | ENST00000382873 | p.P381Q | c.1142 | 0.008740915 | 6.838 | 1 |
| 2999 FECH     | ENST00000382873 | p.A388T | c.1162 | 0.0261327   | 5.258 | 1 |
| 2999 FECH     | ENST00000382873 | p.G148S | c.442  | 0.034873615 | 0     | 1 |
| 3000 HTR1B    | ENST00000369947 | p.L335I | c.1003 | 0.043164827 | 0     | 1 |
| 3000 HTR1B    | ENST00000369947 | p.T209M | c.626  | 0.043164827 | 4.534 | 1 |
| 3001 SEMA7A   | ENST00000261918 | p.Q466H | c.1398 | 0.10083022  | 3.31  | 1 |
| 3001 SEMA7A   | ENST00000261918 | p.P74Q  | c.221  | 0.113566064 | 0     | 1 |
| 3001 SEMA7A   | ENST00000261918 | p.P174L | c.521  | 0.008753041 | 6.836 | 1 |
| 3001 SEMA7A   | ENST00000261918 | p.D175G | c.524  | 0.003982803 | 7.972 | 1 |
| 3002 HIST1H4C | ENST00000377803 | p.R68P  | c.203  | 1.516452049 | 2.72  | 2 |
| 3002 HIST1H4F | ENST00000377745 | p.D69Y  | c.205  | 0.705826522 | 2.312 | 1 |
| 3002 HIST4H4  | ENST00000539745 | p.D69G  | c.206  | 0.705826522 | 2.312 | 1 |
| 3002 HIST1H4F | ENST00000377745 | p.R93C  | c.277  | 1.746865203 | 0     | 2 |
| 3002 HIST1H4H | ENST00000289352 | p.R93Q  | c.278  | 0.78741954  | 4.624 | 1 |
| 3003 RRM1     | ENST00000300738 | p.V473I | c.1417 | 0.011226095 | 6.477 | 1 |
| 3003 RRM1     | ENST00000300738 | p.G504E | c.1511 | 0.011226095 | 0     | 1 |
| 3004 EGFR     | ENST00000275493 | p.D807H | c.2419 | 0.187811346 | 4.588 | 1 |
| 3004 EGFR     | ENST00000275493 | p.S811C | c.2432 | 0.184832466 | 6.115 | 1 |
| 3004 EGFR     | ENST00000275493 | p.I981F | c.2941 | 0.242075781 | 8.037 | 1 |
| 3004 EGFR     | ENST00000275493 | p.G983R | c.2947 | 1.059814223 | 0     | 2 |
| 3005 ITGAX    | ENST00000562522 | p.A87T  | c.259  | 0.010089511 | 6.631 | 1 |
| 3005 ITGAX    | ENST00000562522 | p.G109S | c.325  | 0.010089511 | 0     | 1 |
| 3006 SYMPK    | ENST00000245934 | p.L194M | c.580  | 0.01690976  | 5.886 | 1 |
| 3006 SYMPK    | ENST00000245934 | p.F270L | c.808  | 0.01690976  | 0     | 1 |
| 3007 CTH      | ENST00000370938 | p.E339D | c.1017 | 0.006726166 | 7.216 | 1 |
| 3007 CTH      | ENST00000370938 | p.R62L  | c.185  | 0.006726166 | 0     | 1 |
| 3008 HBP1     | ENST00000222574 | p.S270C | c.808  | 0.01048158  | 0     | 1 |
| 3008 HBP1     | ENST00000222574 | p.E295D | c.885  | 0.01048158  | 6.576 | 1 |
| 3009 ATXN3L   | ENST00000380622 | p.P140T | c.418  | 0.071893243 | 3.798 | 1 |

|      |        |                 |                        |             |             |       |   |
|------|--------|-----------------|------------------------|-------------|-------------|-------|---|
| 3009 | ATXN3L | ENST00000380622 | p.E173D                | c.519       | 0.071893243 | 0     | 1 |
| 3010 | HGF    | ENST00000222390 | p.G216W                | c.646       | 1.040030289 | 0     | 1 |
| 3010 | HGF    | ENST00000222390 | p.G216E                | c.647       | 1.040030289 | 0     | 1 |
| 3010 | HGF    | ENST00000222390 | p.P263S                | c.787       | 0.031598503 | 5.984 | 1 |
| 3010 | HGF    | ENST00000222390 | p.R268K                | c.803       | 0.048462075 | 5.367 | 1 |
| 3011 | MAPK8  | ENST00000374189 | p.D112Y                | c.334       | 0.013583509 | 0     | 1 |
| 3011 | MAPK8  | ENST00000374189 | p.I32V                 | c.94        | 0.013583509 | 6.202 | 1 |
| 3012 | GSTK1  | ENST00000479303 | p.P5L                  | c.14        | 2.035881886 | 0     | 2 |
| 3012 | GSTK1  | ENST00000479303 | p.P5Q                  | c.14        | 2.035881886 | 0     | 1 |
| 3012 | GSTK1  | ENST00000479303 | p.P56L                 | c.166_167   | 0.112676162 | 8.319 | 1 |
| 3012 | GSTK1  | ENST00000479303 | p.L72F                 | c.214       | 0.046963687 | 9.656 | 1 |
| 3012 | GSTK1  | ENST00000479303 | p.H264Y                | c.790       | 0.233242361 | 4.988 | 1 |
| 3013 | RNASE2 | ENST00000304625 | p.W37R                 | c.109       | 0.022359008 | 5.483 | 1 |
| 3013 | RNASE2 | ENST00000304625 | p.N44I                 | c.131       | 0.010836179 | 6.528 | 1 |
| 3013 | RNASE2 | ENST00000304625 | p.V155F                | c.463       | 0.044681026 | 0     | 1 |
| 3013 | RNASE2 | ENST00000304625 | p.K28N                 | c.84        | 0.011485839 | 6.444 | 1 |
| 3014 | PGK1   | ENST00000373316 | p.D98N                 | c.292       | 0.008280881 | 0     | 1 |
| 3014 | PGK1   | ENST00000373316 | p.L122I                | c.364       | 0.008280881 | 6.916 | 1 |
| 3015 | RNGTT  | ENST00000369485 | p.R470C                | c.1408      | 0.07427101  | 0     | 1 |
| 3015 | RNGTT  | ENST00000369485 | p.Y510F                | c.1529      | 0.006973023 | 7.164 | 1 |
| 3015 | RNGTT  | ENST00000369485 | p.K513N                | c.1539      | 0.055398856 | 4.174 | 1 |
| 3015 | RNGTT  | ENST00000369485 | p.N537D                | c.1609      | 0.011899131 | 6.393 | 1 |
| 3016 | SMAP2  | ENST00000372718 | p.Q72K                 | c.214       | 0.025675302 | 6.292 | 1 |
| 3016 | SMAP2  | ENST00000372718 | p.A95T                 | c.283       | 0.010836179 | 6.528 | 1 |
| 3016 | SMAP2  | ENST00000372718 | p.Y96C                 | c.287       | 0.048562954 | 4.364 | 1 |
| 3016 | SMAP2  | ENST00000372718 | p.R126Q                | c.377       | 0.072161149 | 0     | 1 |
| 3017 | DNM3   | ENST00000355305 | p.N178T                | c.533       | 0.001784827 | 0     | 1 |
| 3017 | DNM3   | ENST00000355305 | p.E212K                | c.634       | 0.001784827 | 9.13  | 1 |
| 3018 | ALK    | ENST00000389048 | p.F1174L               | c.3520      | 0.102592701 | 0     | 1 |
| 3018 | ALK    | ENST00000389048 | p.FGM1271in_frame_dell | c.3818_3813 | 0.102592701 | 3.285 | 1 |
| 3019 | PPIL3  | ENST00000409449 | p.S103A                | c.307       | 0.076627179 | 3.706 | 1 |
| 3020 | PARN   | ENST00000437198 | p.S399Y                | c.1196      | 0.004913613 | 7.669 | 1 |
| 3020 | PARN   | ENST00000437198 | p.K75R                 | c.224       | 0.004913613 | 0     | 1 |
| 3021 | APPL1  | ENST00000288266 | p.A143V                | c.428       | 0.160406088 | 0     | 1 |
| 3021 | APPL1  | ENST00000288266 | p.D166H                | c.496       | 0.082089112 | 3.724 | 1 |
| 3021 | APPL1  | ENST00000288266 | p.V167G                | c.500       | 0.091141064 | 3.561 | 1 |
| 3022 | EPRS   | ENST00000366923 | p.A1202T               | c.3604      | 0.063313515 | 6.007 | 1 |
| 3022 | EPRS   | ENST00000366923 | p.I1408T               | c.4223      | 2.015549371 | 0     | 2 |
| 3022 | EPRS   | ENST00000366923 | p.I1408M               | c.4224      | 2.015549371 | 0     | 1 |
| 3023 | NRP2   | ENST00000360409 | p.A295S                | c.882_883   | 0.128712677 | 0     | 1 |
| 3023 | NRP2   | ENST00000360409 | p.W318C                | c.954       | 0.118328273 | 3.096 | 1 |
| 3023 | NRP2   | ENST00000360409 | p.P320L                | c.959       | 0.013135076 | 6.41  | 1 |
| 3024 | MAPK3  | ENST00000263025 | p.E362K                | c.1084      | 0.005493723 | 7.508 | 1 |
| 3024 | MAPK3  | ENST00000263025 | p.L269P                | c.806       | 0.048405079 | 4.511 | 1 |
| 3024 | MAPK3  | ENST00000263025 | p.N314I                | c.941       | 0.049352215 | 0     | 1 |
| 3025 | GART   | ENST00000381831 | p.P143T                | c.427       | 0.077942604 | 5.886 | 1 |
| 3025 | GART   | ENST00000381831 | p.E190D                | c.570       | 0.06101009  | 9.945 | 1 |
| 3025 | GART   | ENST00000381831 | p.L193F                | c.577       | 0.079265462 | 0     | 1 |
| 3025 | GART   | ENST00000381831 | p.M278I                | c.834       | 0.062378456 | 4.027 | 1 |



|      |          |                 |          |        |             |       |   |
|------|----------|-----------------|----------|--------|-------------|-------|---|
| 3026 | HPGDS    | ENST00000295256 | p.A78V   | c.233  | 0.017193416 | 5.862 | 1 |
| 3026 | HPGDS    | ENST00000295256 | p.G79E   | c.236  | 0.010103507 | 6.629 | 1 |
| 3026 | HPGDS    | ENST00000295256 | p.S145F  | c.434  | 0.027296923 | 0     | 1 |
| 3027 | AURKA    | ENST00000395909 | p.E211D  | c.633  | 0.038543412 | 5.159 | 1 |
| 3027 | AURKA    | ENST00000395909 | p.G216R  | c.646  | 0.022020637 | 5.505 | 1 |
| 3027 | AURKA    | ENST00000395909 | p.G265E  | c.794  | 0.050009564 | 0     | 1 |
| 3028 | LILRB2   | ENST00000391749 | p.E239K  | c.715  | 0.017676788 | 5.822 | 1 |
| 3028 | LILRB2   | ENST00000391749 | p.S287T  | c.860  | 0.017676788 | 0     | 1 |
| 3029 | GSK3B    | ENST00000316626 | p.L334M  | c.1000 | 0.007583082 | 0     | 1 |
| 3029 | GSK3B    | ENST00000316626 | p.E249K  | c.745  | 0.007583082 | 7.043 | 1 |
| 3030 | ECE1     | ENST00000374893 | p.R400W  | c.1198 | 0.012797448 | 6.288 | 1 |
| 3030 | ECE1     | ENST00000374893 | p.E311Q  | c.931  | 0.012797448 | 0     | 1 |
| 3031 | NOTCH1   | ENST00000277541 | p.P422S  | c.1264 | 0.168948295 | 0     | 1 |
| 3031 | NOTCH1   | ENST00000277541 | p.R448L  | c.1343 | 0.149524449 | 2.774 | 1 |
| 3031 | NOTCH1   | ENST00000277541 | p.C449Y  | c.1346 | 0.040971118 | 5.458 | 1 |
| 3032 | PITPNA   | ENST00000313486 | p.V136M  | c.406  | 0.006679705 | 7.226 | 1 |
| 3032 | PITPNA   | ENST00000313486 | p.G174D  | c.521  | 0.006679705 | 0     | 1 |
| 3033 | NFASC    | ENST00000367172 | p.G155S  | c.463  | 0.124701713 | 3.026 | 1 |
| 3033 | NFASC    | ENST00000367172 | p.R242T  | c.725  | 0.138522957 | 0     | 1 |
| 3033 | NFASC    | ENST00000367172 | p.K321R  | c.962  | 0.017689771 | 5.988 | 1 |
| 3034 | C5       | ENST00000223642 | p.E1339Q | c.4015 | 0.026552656 | 5.235 | 1 |
| 3034 | C5       | ENST00000223642 | p.K189N  | c.567  | 0.026552656 | 0     | 1 |
| 3035 | PTP4A3   | ENST00000521578 | p.P7L    | c.20   | 0.141022767 | 0     | 1 |
| 3035 | PTP4A3   | ENST00000521578 | p.A106E  | c.317  | 0.141022767 | 2.826 | 1 |
| 3036 | ITSN1    | ENST00000381285 | p.L1433M | c.4297 | 0.030883927 | 6.017 | 1 |
| 3036 | ITSN1    | ENST00000381285 | p.P1460S | c.4378 | 1.031088639 | 0     | 1 |
| 3036 | ITSN1    | ENST00000381285 | p.P1460L | c.4379 | 1.031088639 | 0     | 1 |
| 3036 | ITSN1    | ENST00000381285 | p.D1485N | c.4453 | 0.031293352 | 5.998 | 1 |
| 3037 | ARHGAP25 | ENST00000409202 | p.N103D  | c.307  | 0.168520966 | 0     | 1 |
| 3037 | ARHGAP25 | ENST00000409202 | p.G125R  | c.373  | 0.168520966 | 2.569 | 1 |
| 3038 | MST1R    | ENST00000296474 | p.R470C  | c.1408 | 1.081503171 | 0     | 2 |
| 3038 | MST1R    | ENST00000296474 | p.V498M  | c.1492 | 0.163006342 | 3.617 | 1 |
| 3039 | RAD1     | ENST00000382038 | p.L158M  | c.472  | 0.103758629 | 0     | 1 |
| 3039 | RAD1     | ENST00000382038 | p.D208G  | c.623  | 0.008367428 | 6.901 | 1 |
| 3039 | RAD1     | ENST00000382038 | p.E211K  | c.631  | 0.095391201 | 3.39  | 1 |
| 3040 | COCH     | ENST00000216361 | p.R91Q   | c.272  | 0.440870344 | 0     | 1 |
| 3040 | COCH     | ENST00000216361 | p.V123L  | c.367  | 0.213902291 | 2.573 | 1 |
| 3040 | COCH     | ENST00000216361 | p.T124A  | c.370  | 0.318663886 | 1.874 | 1 |
| 3041 | ADRBK1   | ENST00000308595 | p.K465N  | c.1395 | 0.049240868 | 0     | 1 |
| 3041 | ADRBK1   | ENST00000308595 | p.H330Q  | c.990  | 0.049240868 | 4.344 | 1 |
| 3042 | HGD      | ENST00000283871 | p.V157L  | c.469  | 0.019750048 | 5.662 | 1 |
| 3042 | HGD      | ENST00000283871 | p.L201V  | c.601  | 0.019750048 | 0     | 1 |
| 3043 | GABBR1   | ENST00000377034 | p.G364R  | c.1090 | 1.061044283 | 0     | 1 |
| 3043 | GABBR1   | ENST00000377034 | p.G364E  | c.1091 | 1.061044283 | 0     | 1 |
| 3043 | GABBR1   | ENST00000377034 | p.A53T   | c.157  | 0.122088566 | 4.034 | 1 |
| 3044 | CUL3     | ENST00000264414 | p.L356F  | c.1066 | 0.009618316 | 0     | 1 |
| 3044 | CUL3     | ENST00000264414 | p.L296I  | c.886  | 0.009618316 | 6.7   | 1 |
| 3045 | DAO      | ENST00000228476 | p.L56F   | c.166  | 0.083910781 | 0     | 1 |
| 3045 | DAO      | ENST00000228476 | p.P105L  | c.314  | 0.083910781 | 3.575 | 1 |

|      |          |                 |          |        |             |       |   |
|------|----------|-----------------|----------|--------|-------------|-------|---|
| 3046 | IKBBB    | ENST00000520810 | p.F486L  | c.1458 | 0.038821509 | 4.687 | 1 |
| 3046 | IKBBB    | ENST00000520810 | p.E518K  | c.1552 | 0.038821509 | 0     | 1 |
| 3047 | PRDM12   | ENST00000253008 | p.E170K  | c.508  | 0.00927781  | 6.752 | 1 |
| 3047 | PRDM12   | ENST00000253008 | p.G203E  | c.608  | 0.00927781  | 0     | 1 |
| 3048 | IDE      | ENST00000265986 | p.N788K  | c.2364 | 0.05437171  | 0     | 1 |
| 3048 | IDE      | ENST00000265986 | p.S188L  | c.563  | 0.05437171  | 4.201 | 1 |
| 3049 | STS      | ENST00000217961 | p.D36N   | c.106  | 0.08565368  | 0     | 1 |
| 3049 | STS      | ENST00000217961 | p.G359R  | c.1075 | 0.031867138 | 5.657 | 1 |
| 3049 | STS      | ENST00000217961 | p.V289M  | c.865  | 0.077883587 | 3.925 | 1 |
| 3050 | DNMT3A   | ENST00000321117 | p.F336V  | c.1006 | 0.022815987 | 0     | 1 |
| 3050 | DNMT3A   | ENST00000321117 | p.L300P  | c.899  | 0.01165665  | 6.894 | 1 |
| 3050 | DNMT3A   | ENST00000321117 | p.S312F  | c.935  | 0.014407861 | 6.117 | 1 |
| 3051 | TOP2B    | ENST00000264331 | p.A766T  | c.2296 | 0.00934882  | 0     | 1 |
| 3051 | TOP2B    | ENST00000264331 | p.S823N  | c.2468 | 0.00934882  | 6.741 | 1 |
| 3052 | EPHB2    | ENST00000400191 | p.D416Y  | c.1246 | 0.009342342 | 6.742 | 1 |
| 3052 | EPHB2    | ENST00000400191 | p.D460N  | c.1378 | 0.009342342 | 0     | 1 |
| 3053 | DAPK1    | ENST00000358077 | p.A41S   | c.121  | 0.012473412 | 0     | 1 |
| 3053 | DAPK1    | ENST00000358077 | p.G16R   | c.46   | 0.012473412 | 6.325 | 1 |
| 3054 | NDEL1    | ENST00000299734 | p.E109D  | c.327  | 0.015788304 | 0     | 1 |
| 3054 | NDEL1    | ENST00000299734 | p.R149Q  | c.446  | 0.015788304 | 5.985 | 1 |
| 3055 | MTERF    | ENST00000351870 | p.L225F  | c.675  | 0.017836792 | 0     | 1 |
| 3055 | MTERF    | ENST00000351870 | p.R260W  | c.778  | 0.017836792 | 5.809 | 1 |
| 3056 | MME      | ENST00000360490 | p.D366Y  | c.1096 | 0.0524957   | 0     | 1 |
| 3056 | MME      | ENST00000360490 | p.E272K  | c.814  | 0.024214248 | 5.368 | 1 |
| 3056 | MME      | ENST00000360490 | p.E282K  | c.844  | 0.028281452 | 5.144 | 1 |
| 3057 | EED      | ENST00000351625 | p.H92Y   | c.274  | 0.051688961 | 4.274 | 1 |
| 3057 | EED      | ENST00000351625 | p.G117V  | c.350  | 0.051688961 | 0     | 1 |
| 3058 | NAALAD2  | ENST00000534061 | p.P472L  | c.1415 | 0.095545429 | 4.423 | 1 |
| 3058 | NAALAD2  | ENST00000534061 | p.L483M  | c.1447 | 0.101478158 | 4.334 | 1 |
| 3058 | NAALAD2  | ENST00000534061 | p.S565F  | c.1694 | 1.096200366 | 0     | 1 |
| 3058 | NAALAD2  | ENST00000534061 | p.S565Y  | c.1694 | 1.096200366 | 0     | 1 |
| 3059 | NQO2     | ENST00000380430 | p.G160E  | c.479  | 0.04413295  | 4.502 | 1 |
| 3059 | NQO2     | ENST00000380430 | p.Q213K  | c.637  | 0.04413295  | 0     | 1 |
| 3060 | ALDH18A1 | ENST00000371224 | p.A370T  | c.1108 | 0.004638905 | 7.752 | 1 |
| 3060 | ALDH18A1 | ENST00000371224 | p.V529L  | c.1585 | 0.004638905 | 0     | 1 |
| 3061 | VAV1     | ENST00000602142 | p.E378K  | c.1132 | 0.008912217 | 6.81  | 1 |
| 3061 | VAV1     | ENST00000602142 | p.R63H   | c.188  | 0.008912217 | 0     | 1 |
| 3062 | RBFOX1   | ENST00000547372 | p.P168S  | c.502  | 0.406971593 | 2.297 | 1 |
| 3062 | RBFOX1   | ENST00000547372 | p.R227C  | c.679  | 1.203485796 | 0     | 1 |
| 3062 | RBFOX1   | ENST00000547372 | p.R227L  | c.680  | 1.203485796 | 0     | 1 |
| 3063 | PLXNC1   | ENST00000258526 | p.K1234E | c.3700 | 1.016933218 | 0     | 1 |
| 3063 | PLXNC1   | ENST00000258526 | p.K1234N | c.3702 | 1.016933218 | 0     | 1 |
| 3063 | PLXNC1   | ENST00000258526 | p.E1268K | c.3802 | 0.033866436 | 5.884 | 1 |
| 3064 | RABGEF1  | ENST00000437078 | p.E148K  | c.442  | 0.041984482 | 5.574 | 1 |
| 3064 | KCTD7    | ENST00000380828 | p.E174K  | c.520  | 0.041984482 | 5.574 | 1 |
| 3064 | RABGEF1  | ENST00000437078 | p.E194Q  | c.580  | 0.041984482 | 0     | 1 |
| 3065 | CSF1     | ENST00000369802 | p.L88M   | c.262  | 0.079992026 | 3.644 | 1 |
| 3065 | CSF1     | ENST00000369802 | p.V135I  | c.403  | 0.079992026 | 0     | 1 |
| 3066 | CHEK1    | ENST00000427383 | p.D146Y  | c.436  | 0.07154526  | 3.805 | 1 |

|              |                 |                     |             |             |       |   |
|--------------|-----------------|---------------------|-------------|-------------|-------|---|
| 3066 CHEK1   | ENST00000427383 | p.M183L             | c.547       | 0.07154526  | 0     | 1 |
| 3067 PDE9A   | ENST00000291539 | p.T362M             | c.1085      | 0.07557223  | 3.726 | 1 |
| 3067 PDE9A   | ENST00000291539 | p.E395K             | c.1183      | 0.07557223  | 0     | 1 |
| 3068 LILRB2  | ENST00000391749 | p.G159in_frame_del  | c.478_476   | 0.019681718 | 0     | 1 |
| 3068 LILRB2  | ENST00000391749 | p.S193L             | c.578       | 0.019681718 | 5.667 | 1 |
| 3069 PAK7    | ENST00000378423 | p.I631L             | c.1891      | 0.024013675 | 5.38  | 1 |
| 3069 PAK7    | ENST00000378423 | p.L677I             | c.2029      | 0.024013675 | 0     | 1 |
| 3070 CHN1    | ENST00000409900 | p.R395W             | c.1183      | 1.080604266 | 0     | 1 |
| 3070 CHN1    | ENST00000409900 | p.R395P             | c.1184      | 1.080604266 | 0     | 1 |
| 3070 CHN1    | ENST00000409900 | p.R281W             | c.841       | 0.161208531 | 3.633 | 1 |
| 3071 CFI     | ENST00000394635 | p.H118N             | c.352       | 0.047398986 | 0     | 1 |
| 3071 CFI     | ENST00000394635 | p.S175F             | c.524       | 0.047398986 | 4.399 | 1 |
| 3072 CDKL1   | ENST00000395834 | p.R51W              | c.151       | 0.003664927 | 0     | 1 |
| 3072 CDKL1   | ENST00000395834 | p.H125Y             | c.373       | 0.003664927 | 8.092 | 1 |
| 3073 FGFR2   | ENST00000457416 | p.T174N             | c.521       | 0.097665985 | 0     | 1 |
| 3073 FGFR2   | ENST00000457416 | p.S220C             | c.658       | 0.097665985 | 3.356 | 1 |
| 3075 RPS5    | ENST00000598495 | p.T147A             | c.439       | 0.024327288 | 5.445 | 1 |
| 3075 RPS5    | ENST00000598495 | p.A159V             | c.476       | 0.061118111 | 4.065 | 1 |
| 3075 RPS5    | ENST00000598495 | p.N224S             | c.671       | 0.082702342 | 0     | 1 |
| 3077 CXADR   | ENST00000284878 | p.D180N             | c.538       | 0.019654453 | 5.669 | 1 |
| 3077 CXADR   | ENST00000284878 | p.T209P             | c.625       | 0.019654453 | 0     | 1 |
| 3078 CYP2C9  | ENST00000260682 | p.P363S             | c.1087      | 0.072896836 | 0     | 1 |
| 3078 CYP2C9  | ENST00000260682 | p.I389T             | c.1166      | 0.072896836 | 3.778 | 1 |
| 3079 ERBB3   | ENST00000267101 | p.F94L              | c.282       | 0.006670451 | 0     | 1 |
| 3079 ERBB3   | ENST00000267101 | p.S128N             | c.383       | 0.006670451 | 7.228 | 1 |
| 3080 MEP1B   | ENST00000269202 | p.D178N             | c.532       | 0.010716666 | 6.544 | 1 |
| 3080 MEP1B   | ENST00000269202 | p.F188C             | c.563       | 0.060622619 | 4.044 | 1 |
| 3080 MEP1B   | ENST00000269202 | p.T223I             | c.668       | 0.071339286 | 0     | 1 |
| 3081 AOC1    | ENST00000416793 | p.T169A             | c.505       | 0.01510322  | 0     | 1 |
| 3081 AOC1    | ENST00000416793 | p.T215N             | c.644       | 0.01510322  | 6.049 | 1 |
| 3082 CAND1   | ENST00000545606 | p.K679N             | c.2037      | 0.072493728 | 0     | 1 |
| 3082 CAND1   | ENST00000545606 | p.T718I             | c.2153      | 0.072493728 | 3.786 | 1 |
| 3083 KDM1B   | ENST00000388870 | p.S558L             | c.1673      | 0.008537326 | 6.872 | 1 |
| 3083 KDM1B   | ENST00000388870 | p.Y780H             | c.2338      | 0.008537326 | 0     | 1 |
| 3084 CD86    | ENST00000330540 | p.E34D              | c.102       | 0.014761673 | 7.082 | 1 |
| 3084 CD86    | ENST00000330540 | p.R85H              | c.254       | 1.007380836 | 0     | 2 |
| 3085 TGM2    | ENST00000361475 | p.R601H             | c.1802      | 0.222296798 | 2.326 | 1 |
| 3085 TGM2    | ENST00000361475 | p.G628C             | c.1882      | 0.137485993 | 3.125 | 1 |
| 3085 TGM2    | ENST00000361475 | p.P656S             | c.1966      | 0.314061815 | 0     | 1 |
| 3086 PPIL1   | ENST00000373699 | p.N102S             | c.305       | 0.277584708 | 0     | 1 |
| 3086 PPIL1   | ENST00000373699 | p.T127S             | c.379       | 0.277584708 | 1.849 | 1 |
| 3087 FLNB    | ENST00000490882 | p.W14R              | c.40        | 0.035889559 | 0     | 1 |
| 3087 FLNB    | ENST00000490882 | p.2139in_frame_insS | c.6409_6410 | 0.018249491 | 5.776 | 1 |
| 3087 FLNB    | ENST00000490882 | p.E227G             | c.680       | 0.017640069 | 5.825 | 1 |
| 3088 FKBP14  | ENST00000222803 | p.H39N              | c.115       | 0.009698652 | 6.688 | 1 |
| 3088 FKBP14  | ENST00000222803 | p.R40H              | c.119       | 0.097013659 | 3.501 | 1 |
| 3088 FKBP14  | ENST00000222803 | p.L47F              | c.141       | 0.107031862 | 3.346 | 1 |
| 3088 FKBP14  | ENST00000222803 | p.I134S             | c.401       | 0.196371061 | 0     | 1 |
| 3089 PLEKHM2 | ENST00000375799 | p.L778V             | c.2332      | 0.004108991 | 0     | 1 |

|      |          |                 |                    |           |             |       |   |
|------|----------|-----------------|--------------------|-----------|-------------|-------|---|
| 3089 | PLEKHM2  | ENST00000375799 | p.S857G            | c.2569    | 0.004108991 | 7.927 | 1 |
| 3090 | CTDSP2   | ENST00000398073 | p.V94L             | c.280     | 1.0160087   | 0     | 1 |
| 3090 | CTDSP2   | ENST00000398073 | p.V94M             | c.280     | 1.0160087   | 0     | 1 |
| 3090 | CTDSP2   | ENST00000398073 | p.R184Q            | c.551     | 0.032017401 | 5.965 | 1 |
| 3091 | PGLYRP3  | ENST00000290722 | p.A186S            | c.556     | 0.117684808 | 0     | 1 |
| 3091 | PGLYRP3  | ENST00000290722 | p.Q221K            | c.661     | 0.117684808 | 3.087 | 1 |
| 3092 | CASP2    | ENST00000310447 | p.R361C            | c.1081    | 0.024460018 | 5.883 | 1 |
| 3092 | CASP2    | ENST00000310447 | p.A303T            | c.907     | 0.041963289 | 0     | 1 |
| 3092 | CASP2    | ENST00000310447 | p.G328V            | c.983     | 0.021307293 | 6.18  | 1 |
| 3092 | CASP2    | ENST00000310447 | p.D330E            | c.990     | 0.011226095 | 6.477 | 1 |
| 3093 | SDSL     | ENST00000403593 | p.A75T             | c.223     | 0.00983404  | 6.668 | 1 |
| 3093 | SDSL     | ENST00000403593 | p.D267E            | c.801     | 0.013517761 | 6.209 | 1 |
| 3093 | SDSL     | ENST00000403593 | p.N312K            | c.936     | 0.023351801 | 0     | 1 |
| 3094 | PNLIP    | ENST00000369221 | p.V359A            | c.1076    | 0.02071759  | 5.593 | 1 |
| 3094 | PNLIP    | ENST00000369221 | p.E387K            | c.1159    | 0.02071759  | 0     | 1 |
| 3095 | TXNL4A   | ENST00000269601 | p.E74V             | c.221     | 0.020418207 | 0     | 1 |
| 3095 | TXNL4A   | ENST00000269601 | p.N100in_frame_del | c.302_300 | 0.020418207 | 5.614 | 1 |
| 3096 | LIFR     | ENST00000263409 | p.L451P            | c.1352    | 0.016268935 | 9.425 | 1 |
| 3096 | LIFR     | ENST00000263409 | p.E469K            | c.1405    | 1.207071849 | 0     | 2 |
| 3096 | LIFR     | ENST00000263409 | p.R508Q            | c.1523    | 0.241680517 | 3.199 | 1 |
| 3096 | LIFR     | ENST00000263409 | p.R510C            | c.1528    | 1.101989092 | 4.37  | 1 |
| 3096 | LIFR     | ENST00000263409 | p.R510H            | c.1529    | 1.101989092 | 4.37  | 1 |
| 3097 | SERPING1 | ENST00000403558 | p.C471R            | c.1411    | 0.09386295  | 3.608 | 1 |
| 3097 | SERPING1 | ENST00000403558 | p.G472E            | c.1415    | 0.206402452 | 2.791 | 1 |
| 3097 | SERPING1 | ENST00000403558 | p.V161I            | c.481     | 0.057300821 | 7.111 | 1 |
| 3097 | SERPING1 | ENST00000403558 | p.G218E            | c.653     | 0.233732995 | 0     | 1 |
| 3098 | TOP3A    | ENST00000321105 | p.I369V            | c.1105    | 0.011791732 | 6.585 | 1 |
| 3098 | TOP3A    | ENST00000321105 | p.R405L            | c.1214    | 0.142452099 | 0     | 1 |
| 3098 | TOP3A    | ENST00000321105 | p.R323W            | c.967     | 0.137876423 | 2.921 | 1 |
| 3099 | C8B      | ENST00000371237 | p.L138F            | c.412     | 2.107270372 | 0     | 1 |
| 3099 | C8B      | ENST00000371237 | p.L138R            | c.413     | 2.107270372 | 0     | 2 |
| 3099 | C8B      | ENST00000371237 | p.G198D            | c.593     | 0.271359223 | 3.475 | 1 |
| 3099 | C8B      | ENST00000371237 | p.G199R            | c.595     | 0.058796525 | 5.85  | 1 |
| 3100 | ITGAX    | ENST00000562522 | p.D682N            | c.2044    | 0.034735858 | 8.306 | 1 |
| 3100 | ITGAX    | ENST00000562522 | p.R685C            | c.2053    | 3.15041086  | 0     | 1 |
| 3100 | ITGAX    | ENST00000562522 | p.R685H            | c.2054    | 3.15041086  | 0     | 3 |
| 3100 | ITGAX    | ENST00000562522 | p.T728I            | c.2183    | 0.631295637 | 2.806 | 1 |
| 3100 | ITGAX    | ENST00000562522 | p.E903D            | c.2709    | 0.296656536 | 7.875 | 1 |
| 3101 | IPO13    | ENST00000372343 | p.V548M            | c.1642    | 0.030691862 | 5.026 | 1 |
| 3101 | IPO13    | ENST00000372343 | p.A593V            | c.1778    | 0.04151303  | 0     | 1 |
| 3101 | IPO13    | ENST00000372343 | p.L647V            | c.1939    | 0.010821168 | 6.53  | 1 |
| 3102 | MAN1B1   | ENST00000535144 | p.W410L            | c.1229    | 0.031576608 | 0     | 1 |
| 3103 | ASH1L    | ENST00000368346 | p.R2160K           | c.6479    | 0.010972226 | 0     | 1 |
| 3103 | ASH1L    | ENST00000368346 | p.R2281Q           | c.6842    | 0.010972226 | 6.51  | 1 |
| 3104 | YARS2    | ENST00000324868 | p.T75S             | c.224     | 0.007494251 | 7.06  | 1 |
| 3104 | YARS2    | ENST00000324868 | p.L101W            | c.302     | 0.007494251 | 0     | 1 |
| 3105 | MORF4L1  | ENST00000331268 | p.E194K            | c.580     | 0.035800457 | 5.008 | 1 |
| 3105 | MORF4L1  | ENST00000331268 | p.M267V            | c.799     | 0.156708175 | 2.718 | 1 |
| 3105 | MORF4L1  | ENST00000331268 | p.R308Q            | c.923     | 0.183062103 | 0     | 1 |

|             |                 |          |        |             |       |   |
|-------------|-----------------|----------|--------|-------------|-------|---|
| 3106 ADCY10 | ENST00000367851 | p.A148V  | c.443  | 0.026460791 | 0     | 1 |
| 3106 ADCY10 | ENST00000367851 | p.V172M  | c.514  | 0.026460791 | 5.24  | 1 |
| 3107 DVL2   | ENST00000005340 | p.P359H  | c.1076 | 0.037629293 | 0     | 1 |
| 3107 DVL2   | ENST00000005340 | p.E312G  | c.935  | 0.037629293 | 4.732 | 1 |
| 3108 ATXN3  | ENST00000545170 | p.D41H   | c.121  | 0.066109435 | 3.919 | 1 |
| 3108 ATXN3  | ENST00000545170 | p.S76F   | c.227  | 0.066109435 | 0     | 1 |
| 3109 IL7    | ENST00000263851 | p.S44N   | c.131  | 0.049043066 | 4.452 | 1 |
| 3109 IL7    | ENST00000263851 | p.M52I   | c.156  | 0.076757644 | 3.768 | 1 |
| 3109 IL7    | ENST00000263851 | p.D101H  | c.301  | 0.119093168 | 0     | 1 |
| 3110 BIN2   | ENST00000267012 | p.R153Q  | c.458  | 0.009985151 | 6.646 | 1 |
| 3110 BIN2   | ENST00000267012 | p.A180S  | c.538  | 0.009985151 | 0     | 1 |
| 3111 ASMT   | ENST00000381241 | p.G42R   | c.124  | 0.031012637 | 5.011 | 1 |
| 3111 ASMT   | ENST00000381241 | p.Y84C   | c.251  | 0.031012637 | 0     | 1 |
| 3112 CAPN2  | ENST00000295006 | p.S113F  | c.338  | 0.013583509 | 0     | 1 |
| 3112 CAPN2  | ENST00000295006 | p.L238F  | c.712  | 0.013583509 | 6.202 | 1 |
| 3113 PTPRM  | ENST00000400060 | p.N197D  | c.589  | 0.069843355 | 0     | 1 |
| 3113 PTPRM  | ENST00000400060 | p.E280D  | c.840  | 0.023676263 | 5.467 | 1 |
| 3113 PTPRM  | ENST00000400060 | p.P281Q  | c.842  | 0.056109999 | 4.404 | 1 |
| 3114 DMC1   | ENST00000216024 | p.F85L   | c.255  | 1.060162153 | 0     | 2 |
| 3114 DMC1   | ENST00000216024 | p.H211Y  | c.631  | 0.120324305 | 4.055 | 1 |
| 3115 EGFR   | ENST00000275493 | p.P373Q  | c.1118 | 0.012015163 | 6.379 | 1 |
| 3115 EGFR   | ENST00000275493 | p.V441I  | c.1321 | 0.076629584 | 0     | 1 |
| 3115 EGFR   | ENST00000275493 | p.G465R  | c.1393 | 0.064614421 | 3.952 | 1 |
| 3116 CTSL   | ENST00000340342 | p.R153W  | c.457  | 0.501736188 | 2.21  | 1 |
| 3116 CTSL   | ENST00000340342 | p.V242L  | c.724  | 1.240635572 | 0     | 1 |
| 3116 CTSL   | ENST00000340342 | p.V242M  | c.724  | 1.240635572 | 0     | 1 |
| 3116 CTSL   | ENST00000340342 | p.R319I  | c.956  | 0.145006298 | 5.351 | 1 |
| 3117 MSL3   | ENST00000312196 | p.L486V  | c.1456 | 0.015810206 | 0     | 1 |
| 3117 MSL3   | ENST00000312196 | p.K249N  | c.747  | 0.015810206 | 5.983 | 1 |
| 3118 PARP14 | ENST00000474629 | p.P1606H | c.4817 | 0.020683126 | 5.669 | 1 |
| 3118 PARP14 | ENST00000474629 | p.E1628Q | c.4882 | 0.059071171 | 8.411 | 1 |
| 3118 PARP14 | ENST00000474629 | p.L1656I | c.4966 | 0.167861704 | 0     | 1 |
| 3118 PARP14 | ENST00000474629 | p.V1692F | c.5074 | 0.11427264  | 4.256 | 1 |
| 3118 PARP14 | ENST00000474629 | p.N1698D | c.5092 | 0.088639469 | 4.401 | 1 |
| 3118 PARP14 | ENST00000474629 | p.V1717I | c.5149 | 0.048229921 | 4.511 | 1 |
| 3118 PARP14 | ENST00000474629 | p.Q1790E | c.5368 | 0.038492486 | 9.167 | 1 |
| 3119 PDE3A  | ENST00000359062 | p.D837N  | c.2509 | 1.045720976 | 0     | 2 |
| 3119 PDE3A  | ENST00000359062 | p.D950A  | c.2849 | 0.091441951 | 4.451 | 1 |
| 3120 NMT1   | ENST00000592782 | p.E178Q  | c.532  | 0.016584738 | 5.914 | 1 |
| 3120 NMT1   | ENST00000592782 | p.R189Q  | c.566  | 0.008955564 | 6.803 | 1 |
| 3120 NMT1   | ENST00000592782 | p.R255H  | c.764  | 0.025540302 | 0     | 1 |
| 3121 ASPH   | ENST00000379454 | p.P696S  | c.2086 | 0.078128894 | 0     | 1 |
| 3121 ASPH   | ENST00000379454 | p.R735W  | c.2203 | 0.078128894 | 3.678 | 1 |
| 3122 ALB    | ENST00000295897 | p.R34W   | c.100  | 0.264998946 | 0     | 1 |
| 3122 ALB    | ENST00000295897 | p.Y174F  | c.521  | 0.185847874 | 7.617 | 1 |
| 3122 ALB    | ENST00000295897 | p.C277W  | c.831  | 0.132527831 | 5.774 | 1 |
| 3122 ALB    | ENST00000295897 | p.D279Y  | c.835  | 0.248580957 | 2.227 | 1 |
| 3122 ALB    | ENST00000295897 | p.D283E  | c.849  | 0.048909841 | 5.157 | 1 |
| 3123 IL1R1  | ENST00000410023 | p.K162R  | c.485  | 0.060162153 | 0     | 1 |

|      |           |                 |          |           |             |       |   |
|------|-----------|-----------------|----------|-----------|-------------|-------|---|
| 3123 | IL1R1     | ENST00000410023 | p.G192W  | c.574     | 0.060162153 | 4.055 | 1 |
| 3124 | VCP       | ENST00000358901 | p.I353N  | c.1058    | 0.101742898 | 0     | 1 |
| 3124 | VCP       | ENST00000358901 | p.A310T  | c.928     | 0.101742898 | 3.297 | 1 |
| 3125 | CRMP1     | ENST00000324989 | p.S228C  | c.683     | 0.009220112 | 6.761 | 1 |
| 3125 | CRMP1     | ENST00000324989 | p.V262I  | c.784     | 0.009220112 | 0     | 1 |
| 3126 | FNTA      | ENST00000302279 | p.D110H  | c.328     | 0.019665449 | 5.809 | 1 |
| 3126 | FNTA      | ENST00000302279 | p.R112I  | c.335     | 0.104350271 | 3.286 | 1 |
| 3126 | FNTA      | ENST00000302279 | p.L140V  | c.418     | 0.120358406 | 0     | 1 |
| 3127 | TTN       | ENST00000589042 | p.P103S  | c.307     | 1.011686607 | 0     | 2 |
| 3127 | TTN       | ENST00000589042 | p.P131S  | c.391_390 | 0.068246481 | 6.419 | 1 |
| 3128 | VRK1      | ENST00000216639 | p.Q88L   | c.263     | 0.02046071  | 5.611 | 1 |
| 3128 | VRK1      | ENST00000216639 | p.D273Y  | c.817     | 0.010642641 | 6.554 | 1 |
| 3128 | VRK1      | ENST00000216639 | p.A33T   | c.97      | 0.031103351 | 0     | 1 |
| 3129 | MYO5C     | ENST00000261839 | p.E1570K | c.4708    | 0.065108964 | 0     | 1 |
| 3129 | MYO5C     | ENST00000261839 | p.P1717S | c.5149    | 0.065108964 | 3.941 | 1 |
| 3130 | ARHGAP20  | ENST00000260283 | p.A506P  | c.1516    | 0.080102995 | 3.642 | 1 |
| 3130 | ARHGAP20  | ENST00000260283 | p.E545D  | c.1635    | 0.080102995 | 0     | 1 |
| 3131 | POLI      | ENST00000579534 | p.S337L  | c.1010    | 0.059862715 | 0     | 1 |
| 3131 | POLI      | ENST00000579534 | p.R372H  | c.1115    | 0.043317928 | 6.459 | 1 |
| 3131 | POLI      | ENST00000579534 | p.I300S  | c.899     | 0.048495678 | 4.366 | 1 |
| 3132 | NCAM2     | ENST00000400546 | p.W413L  | c.1238    | 1.217381259 | 0     | 1 |
| 3132 | NCAM2     | ENST00000400546 | p.W413C  | c.1239    | 1.217381259 | 0     | 1 |
| 3132 | NCAM2     | ENST00000400546 | p.A493D  | c.1478    | 0.21767844  | 3.28  | 1 |
| 3132 | NCAM2     | ENST00000400546 | p.G574E  | c.1721    | 0.212147948 | 3.319 | 1 |
| 3132 | NCAM2     | ENST00000400546 | p.G576R  | c.1726    | 0.031349127 | 6.135 | 1 |
| 3133 | CD207     | ENST00000410009 | p.F206L  | c.618     | 0.014538276 | 0     | 1 |
| 3133 | CD207     | ENST00000410009 | p.S228L  | c.683     | 0.014538276 | 6.104 | 1 |
| 3134 | TPBG      | ENST00000369750 | p.G136C  | c.406     | 0.052775055 | 0     | 1 |
| 3134 | TPBG      | ENST00000369750 | p.A161T  | c.481     | 0.052775055 | 4.244 | 1 |
| 3135 | CD207     | ENST00000410009 | p.Y251C  | c.752     | 0.026223426 | 5.253 | 1 |
| 3135 | CD207     | ENST00000410009 | p.K299N  | c.897     | 0.026223426 | 0     | 1 |
| 3136 | PDK3      | ENST00000441463 | p.S87I   | c.260     | 0.013285534 | 6.234 | 1 |
| 3136 | PDK3      | ENST00000441463 | p.R116I  | c.347     | 0.013285534 | 0     | 1 |
| 3137 | AZGP1     | ENST00000292401 | p.G113R  | c.337     | 1.021701968 | 0     | 2 |
| 3137 | AZGP1     | ENST00000292401 | p.A133P  | c.397     | 0.05933627  | 9.739 | 1 |
| 3137 | AZGP1     | ENST00000292401 | p.W154S  | c.461     | 0.098059311 | 5.606 | 1 |
| 3138 | EPHX2     | ENST00000521400 | p.V491F  | c.1471    | 0.009800017 | 0     | 1 |
| 3138 | EPHX2     | ENST00000521400 | p.P512T  | c.1534    | 0.009800017 | 6.673 | 1 |
| 3139 | SERPINB3  | ENST00000283752 | p.T112M  | c.335     | 0.005459558 | 7.517 | 1 |
| 3139 | SERPINB3  | ENST00000283752 | p.D297N  | c.889     | 0.005459558 | 0     | 1 |
| 3140 | SERPINA12 | ENST00000556881 | p.S93N   | c.278     | 0.007016659 | 0     | 1 |
| 3140 | SERPINA12 | ENST00000556881 | p.E333Q  | c.997     | 0.007016659 | 7.155 | 1 |
| 3142 | UBE3A     | ENST00000397954 | p.R763W  | c.2287    | 0.037085525 | 4.753 | 1 |
| 3142 | UBE3A     | ENST00000397954 | p.T810M  | c.2429    | 0.021167578 | 5.562 | 1 |
| 3142 | UBE3A     | ENST00000397954 | p.G831C  | c.2491    | 0.058253103 | 0     | 1 |
| 3143 | HDAC8     | ENST00000373573 | p.E23K   | c.67      | 0.013285534 | 6.234 | 1 |
| 3143 | HDAC8     | ENST00000373573 | p.G324R  | c.970     | 0.013285534 | 0     | 1 |
| 3144 | MMP13     | ENST00000260302 | p.G374R  | c.1120    | 0.012157581 | 0     | 1 |
| 3144 | MMP13     | ENST00000260302 | p.I411T  | c.1232    | 0.012157581 | 6.362 | 1 |

|              |                 |          |        |             |       |   |
|--------------|-----------------|----------|--------|-------------|-------|---|
| 3145 DHX58   | ENST00000251642 | p.V552M  | c.1654 | 0.019478144 | 6.682 | 1 |
| 3145 DHX58   | ENST00000251642 | p.R646W  | c.1936 | 1.009739072 | 0     | 1 |
| 3145 DHX58   | ENST00000251642 | p.R646Q  | c.1937 | 1.009739072 | 0     | 1 |
| 3146 FARP1   | ENST00000376586 | p.S564P  | c.1690 | 1.004483994 | 0     | 1 |
| 3146 FARP1   | ENST00000376586 | p.S564L  | c.1691 | 1.004483994 | 0     | 1 |
| 3146 FARP1   | ENST00000376586 | p.V673L  | c.2017 | 0.008967988 | 7.801 | 1 |
| 3147 USP21   | ENST00000289865 | p.L400M  | c.1198 | 0.156691628 | 0     | 1 |
| 3147 USP21   | ENST00000289865 | p.H462L  | c.1385 | 0.156691628 | 2.674 | 1 |
| 3148 DNMT3A  | ENST00000321117 | p.Y533C  | c.1598 | 0.035545936 | 4.913 | 1 |
| 3148 DNMT3A  | ENST00000321117 | p.R556M  | c.1667 | 0.104095942 | 0     | 1 |
| 3148 DNMT3A  | ENST00000321117 | p.M585L  | c.1753 | 0.073256929 | 3.818 | 1 |
| 3149 DARS2   | ENST00000361951 | p.E225D  | c.675  | 0.002153651 | 8.859 | 1 |
| 3149 DARS2   | ENST00000361951 | p.E277D  | c.831  | 0.002153651 | 0     | 1 |
| 3150 PLAT    | ENST00000220809 | p.A356T  | c.1066 | 0.105989996 | 3.238 | 1 |
| 3150 PLAT    | ENST00000220809 | p.G381D  | c.1142 | 0.105989996 | 0     | 1 |
| 3151 PGAM1   | ENST00000334828 | p.P173S  | c.517  | 0.01431826  | 6.126 | 1 |
| 3151 PGAM1   | ENST00000334828 | p.A3S    | c.7    | 0.01431826  | 0     | 1 |
| 3152 AP1B1   | ENST00000405198 | p.M74I   | c.222  | 0.004616451 | 7.759 | 1 |
| 3152 AP1B1   | ENST00000405198 | p.A106E  | c.317  | 0.010213958 | 0     | 1 |
| 3152 AP1B1   | ENST00000405198 | p.Y136F  | c.407  | 0.005597506 | 7.481 | 1 |
| 3153 MMP16   | ENST00000286614 | p.W159S  | c.476  | 0.115045889 | 0     | 1 |
| 3153 MMP16   | ENST00000286614 | p.H246L  | c.737  | 0.031131987 | 5.125 | 1 |
| 3153 MMP16   | ENST00000286614 | p.L254V  | c.760  | 0.088865123 | 3.533 | 1 |
| 3154 DPP4    | ENST00000360534 | p.G643E  | c.1928 | 0.030344537 | 6.382 | 1 |
| 3154 DPP4    | ENST00000360534 | p.F647L  | c.1941 | 0.108006895 | 3.228 | 1 |
| 3154 DPP4    | ENST00000360534 | p.V698F  | c.2092 | 0.118717418 | 0     | 1 |
| 3155 NSD1    | ENST00000439151 | p.Y1997C | c.5990 | 0.024247839 | 5.366 | 1 |
| 3155 NSD1    | ENST00000439151 | p.F2018L | c.6054 | 0.049931595 | 0     | 1 |
| 3155 NSD1    | ENST00000439151 | p.L2054R | c.6161 | 0.025683756 | 5.283 | 1 |
| 3156 AGTR1   | ENST00000404754 | p.F117L  | c.349  | 0.203208759 | 0     | 1 |
| 3156 AGTR1   | ENST00000404754 | p.L202M  | c.604  | 0.166899316 | 2.644 | 1 |
| 3156 AGTR1   | ENST00000404754 | p.I211M  | c.633  | 0.050139971 | 4.532 | 1 |
| 3157 F11R    | ENST00000368026 | p.V46A   | c.137  | 0.087546481 | 0     | 1 |
| 3157 F11R    | ENST00000368026 | p.R86L   | c.257  | 0.009066485 | 7.384 | 1 |
| 3157 F11R    | ENST00000368026 | p.I94M   | c.282  | 0.081559684 | 3.616 | 1 |
| 3158 CNOT1   | ENST00000317147 | p.V2171L | c.6511 | 0.029728696 | 5.072 | 1 |
| 3158 CNOT1   | ENST00000317147 | p.N2211S | c.6632 | 0.050048073 | 0     | 1 |
| 3158 CNOT1   | ENST00000317147 | p.L2265F | c.6793 | 0.020319377 | 5.621 | 1 |
| 3159 GLUL    | ENST00000311223 | p.F89L   | c.267  | 0.148500682 | 2.871 | 1 |
| 3159 GLUL    | ENST00000311223 | p.Y137H  | c.409  | 0.187398367 | 3.533 | 1 |
| 3159 GLUL    | ENST00000311223 | p.V176M  | c.526  | 0.230210863 | 0     | 1 |
| 3159 GLUL    | ENST00000311223 | p.P199S  | c.595  | 0.170522998 | 7.132 | 1 |
| 3160 TBL1XR1 | ENST00000457928 | p.D504Y  | c.1510 | 0.202786742 | 3.643 | 1 |
| 3160 TBL1XR1 | ENST00000457928 | p.R166W  | c.496  | 1.082938924 | 0     | 1 |
| 3160 TBL1XR1 | ENST00000457928 | p.R166Q  | c.497  | 1.082938924 | 0     | 1 |
| 3160 TBL1XR1 | ENST00000457928 | p.E171K  | c.511  | 0.223798952 | 8.434 | 1 |
| 3161 ITGAM   | ENST00000544665 | p.A407T  | c.1219 | 0.037684125 | 0     | 1 |
| 3161 ITGAM   | ENST00000544665 | p.A523T  | c.1567 | 0.011241669 | 6.475 | 1 |
| 3161 ITGAM   | ENST00000544665 | p.A524S  | c.1570 | 0.034190243 | 5.241 | 1 |

|               |                 |          |        |             |       |   |
|---------------|-----------------|----------|--------|-------------|-------|---|
| 3162 PPP2R4   | ENST00000452489 | p.C94S   | c.281  | 0.009005362 | 6.795 | 1 |
| 3162 PPP2R4   | ENST00000452489 | p.P96A   | c.286  | 0.008838394 | 6.822 | 1 |
| 3162 PPP2R4   | ENST00000452489 | p.L198F  | c.592  | 0.017843756 | 0     | 1 |
| 3163 TNPO1    | ENST00000337273 | p.I802M  | c.2406 | 0.131843208 | 0     | 1 |
| 3163 TNPO1    | ENST00000337273 | p.S834T  | c.2501 | 0.062223641 | 4.09  | 1 |
| 3163 TNPO1    | ENST00000337273 | p.G835S  | c.2503 | 0.122665902 | 4.067 | 1 |
| 3163 TNPO1    | ENST00000337273 | p.L857P  | c.2570 | 0.063048534 | 8.138 | 1 |
| 3163 TNPO1    | ENST00000337273 | p.R879C  | c.2635 | 0.009909308 | 6.657 | 1 |
| 3164 TEK      | ENST00000380036 | p.G58E   | c.173  | 0.142496659 | 0     | 1 |
| 3164 TEK      | ENST00000380036 | p.F101L  | c.303  | 0.142496659 | 2.811 | 1 |
| 3165 IL13RA1  | ENST00000371666 | p.E279Q  | c.835  | 0.005208198 | 0     | 1 |
| 3165 IL13RA1  | ENST00000371666 | p.N317K  | c.951  | 0.005208198 | 7.585 | 1 |
| 3166 MST1R    | ENST00000296474 | p.R1118C | c.3352 | 0.113341739 | 0     | 1 |
| 3166 MST1R    | ENST00000296474 | p.R1231C | c.3691 | 0.084636538 | 3.607 | 1 |
| 3166 MST1R    | ENST00000296474 | p.D1235E | c.3705 | 0.033838136 | 4.999 | 1 |
| 3167 ACSM2A   | ENST00000424070 | p.Q139K  | c.415  | 0.148223403 | 4.66  | 1 |
| 3167 ACSM2A   | ENST00000424070 | p.M140I  | c.420  | 0.081265689 | 5.799 | 1 |
| 3167 ACSM2A   | ENST00000424070 | p.D161N  | c.481  | 0.033838531 | 8.227 | 1 |
| 3167 ACSM2A   | ENST00000424070 | p.E162K  | c.484  | 0.176061025 | 0     | 1 |
| 3168 CDC42BPB | ENST00000361246 | p.D75N   | c.223  | 1.008856792 | 0     | 1 |
| 3168 CDC42BPB | ENST00000361246 | p.D75E   | c.225  | 1.008856792 | 0     | 1 |
| 3168 CDC42BPB | ENST00000361246 | p.T98I   | c.293  | 0.017713585 | 6.819 | 1 |
| 3169 SULT1B1  | ENST00000310613 | p.L86I   | c.256  | 0.013715966 | 6.188 | 1 |
| 3169 SULT1B1  | ENST00000310613 | p.L89F   | c.267  | 0.067779838 | 3.883 | 1 |
| 3169 SULT1B1  | ENST00000310613 | p.P245T  | c.733  | 0.081495804 | 0     | 1 |
| 3170 ERBB4    | ENST00000342788 | p.Q558H  | c.1674 | 0.034149304 | 4.872 | 1 |
| 3170 ERBB4    | ENST00000342788 | p.F583Y  | c.1748 | 0.041175697 | 0     | 1 |
| 3170 ERBB4    | ENST00000342788 | p.P610T  | c.1828 | 0.007026393 | 7.153 | 1 |
| 3171 GIMAP4   | ENST00000461940 | p.G56E   | c.167  | 1.070024326 | 0     | 2 |
| 3171 GIMAP4   | ENST00000461940 | p.V134L  | c.400  | 0.140048652 | 3.836 | 1 |
| 3172 XDH      | ENST00000379416 | p.D719N  | c.2155 | 0.113714773 | 3.267 | 1 |
| 3172 XDH      | ENST00000379416 | p.L860F  | c.2578 | 0.125779599 | 0     | 1 |
| 3172 XDH      | ENST00000379416 | p.R896W  | c.2686 | 0.031732907 | 5.513 | 1 |
| 3173 GMPS     | ENST00000496455 | p.M107V  | c.319  | 0.085329904 | 0     | 1 |
| 3173 GMPS     | ENST00000496455 | p.V157A  | c.470  | 0.074583484 | 3.745 | 1 |
| 3173 GMPS     | ENST00000496455 | p.A168V  | c.503  | 0.01074642  | 6.54  | 1 |
| 3174 CSF1R    | ENST00000286301 | p.L263F  | c.787  | 0.011973593 | 0     | 1 |
| 3174 CSF1R    | ENST00000286301 | p.F293C  | c.878  | 0.011973593 | 6.384 | 1 |
| 3175 KYNU     | ENST00000264170 | p.P334L  | c.1001 | 0.065471008 | 3.933 | 1 |
| 3175 KYNU     | ENST00000264170 | p.I110N  | c.329  | 0.065471008 | 0     | 1 |
| 3176 RGS7     | ENST00000407727 | p.E383K  | c.1147 | 1.009881871 | 0     | 2 |
| 3176 RGS7     | ENST00000407727 | p.V411M  | c.1231 | 0.019763743 | 6.661 | 1 |
| 3177 NAALAD2  | ENST00000534061 | p.V165L  | c.493  | 0.055552668 | 4.17  | 1 |
| 3177 NAALAD2  | ENST00000534061 | p.C186S  | c.557  | 0.055552668 | 0     | 1 |
| 3178 SI       | ENST00000264382 | p.D69Y   | c.205  | 0.021777313 | 0     | 1 |
| 3178 SI       | ENST00000264382 | p.C94S   | c.280  | 0.013536513 | 6.207 | 1 |
| 3178 SI       | ENST00000264382 | p.P104R  | c.311  | 0.008240799 | 6.923 | 1 |
| 3179 PKP1     | ENST00000263946 | p.P382S  | c.1144 | 0.010664795 | 6.551 | 1 |
| 3179 PKP1     | ENST00000263946 | p.F403V  | c.1207 | 0.010664795 | 0     | 1 |



|      |         |                 |         |        |             |       |   |
|------|---------|-----------------|---------|--------|-------------|-------|---|
| 3180 | PTK2B   | ENST00000544172 | p.M537I | c.1611 | 0.260420476 | 0     | 1 |
| 3180 | PTK2B   | ENST00000544172 | p.L565M | c.1693 | 0.225706068 | 2.21  | 1 |
| 3180 | PTK2B   | ENST00000544172 | p.F611S | c.1832 | 0.053857929 | 4.497 | 1 |
| 3181 | EXOSC7  | ENST00000265564 | p.D120Y | c.358  | 0.085555238 | 3.547 | 1 |
| 3181 | EXOSC7  | ENST00000265564 | p.K122N | c.366  | 0.007324774 | 7.093 | 1 |
| 3181 | EXOSC7  | ENST00000265564 | p.V194A | c.581  | 0.094920317 | 0     | 1 |
| 3181 | EXOSC7  | ENST00000265564 | p.H267L | c.800  | 0.002040304 | 8.937 | 1 |
| 3183 | ENPP4   | ENST00000321037 | p.L265W | c.794  | 0.091425374 | 3.52  | 1 |
| 3183 | ENPP4   | ENST00000321037 | p.M291I | c.873  | 0.11603141  | 4.357 | 1 |
| 3183 | ENPP4   | ENST00000321037 | p.L316F | c.948  | 0.066051651 | 8.346 | 1 |
| 3183 | ENPP4   | ENST00000321037 | p.I324M | c.972  | 0.139043926 | 0     | 1 |
| 3184 | VAT1L   | ENST00000302536 | p.E362K | c.1084 | 0.00535091  | 0     | 1 |
| 3184 | VAT1L   | ENST00000302536 | p.R88Q  | c.263  | 0.00535091  | 7.546 | 1 |
| 3185 | CYP2C9  | ENST00000260682 | p.G135R | c.403  | 0.025068161 | 5.318 | 1 |
| 3185 | CYP2C9  | ENST00000260682 | p.M269I | c.807  | 0.025068161 | 0     | 1 |
| 3186 | FARS2   | ENST00000324331 | p.R338C | c.1012 | 0.043252655 | 8.049 | 1 |
| 3186 | FARS2   | ENST00000324331 | p.M421K | c.1262 | 0.29136523  | 3.188 | 1 |
| 3186 | FARS2   | ENST00000324331 | p.P327L | c.980  | 0.047018858 | 7.925 | 1 |
| 3186 | FARS2   | ENST00000324331 | p.R330C | c.988  | 1.117618221 | 0     | 1 |
| 3186 | FARS2   | ENST00000324331 | p.R330H | c.989  | 1.117618221 | 0     | 1 |
| 3187 | CASP1   | ENST00000598974 | p.E367K | c.1099 | 0.045911921 | 4.486 | 1 |
| 3187 | CASP1   | ENST00000598974 | p.V392M | c.1174 | 0.073460827 | 0     | 1 |
| 3187 | CASP1   | ENST00000598974 | p.A329T | c.985  | 0.0301225   | 5.116 | 1 |
| 3188 | EPHA5   | ENST00000273854 | p.R804K | c.2411 | 0.105330854 | 0     | 1 |
| 3188 | EPHA5   | ENST00000273854 | p.W844L | c.2531 | 0.105330854 | 3.247 | 1 |
| 3189 | PTPRF   | ENST00000359947 | p.R808G | c.2422 | 0.015682353 | 6.297 | 1 |
| 3189 | PTPRF   | ENST00000359947 | p.P811S | c.2431 | 0.236061112 | 2.101 | 1 |
| 3189 | PTPRF   | ENST00000359947 | p.R891W | c.2671 | 0.245814484 | 0     | 1 |
| 3190 | PIP4K2C | ENST00000540759 | p.R112H | c.335  | 0.047243873 | 6.477 | 1 |
| 3190 | PIP4K2C | ENST00000540759 | p.R147W | c.439  | 0.017240481 | 6.987 | 1 |
| 3190 | PIP4K2C | ENST00000540759 | p.R204H | c.611  | 1.019109311 | 0     | 2 |
| 3191 | PLXNC1  | ENST00000258526 | p.S462L | c.1385 | 1.008789519 | 0     | 2 |
| 3191 | PLXNC1  | ENST00000258526 | p.P507L | c.1520 | 0.017579039 | 6.83  | 1 |
| 3192 | WIF1    | ENST00000286574 | p.V147L | c.439  | 0.198196034 | 0     | 1 |
| 3192 | WIF1    | ENST00000286574 | p.F174L | c.522  | 0.198196034 | 2.335 | 1 |
| 3193 | FANCE   | ENST00000229769 | p.S356N | c.1067 | 0.042718358 | 5.549 | 1 |
| 3193 | FANCE   | ENST00000229769 | p.P397S | c.1189 | 1.021359179 | 0     | 1 |
| 3193 | FANCE   | ENST00000229769 | p.P397T | c.1189 | 1.021359179 | 0     | 1 |
| 3194 | CALCRL  | ENST00000392370 | p.Q86K  | c.256  | 0.008728806 | 6.84  | 1 |
| 3194 | CALCRL  | ENST00000392370 | p.T122I | c.365  | 0.008728806 | 0     | 1 |
| 3195 | PPP1CC  | ENST00000340766 | p.E56K  | c.166  | 0.052483218 | 4.252 | 1 |
| 3195 | PPP1CC  | ENST00000340766 | p.V165M | c.493  | 0.052483218 | 0     | 1 |
| 3196 | B2M     | ENST00000559916 | p.Y98C  | c.293  | 0.082640913 | 0     | 1 |
| 3196 | B2M     | ENST00000559916 | p.L15F  | c.43   | 0.082640913 | 3.597 | 1 |
| 3197 | PGF     | ENST00000405431 | p.R53Q  | c.158  | 0.044831052 | 6.06  | 1 |
| 3197 | PGF     | ENST00000405431 | p.E129K | c.385  | 1.014988502 | 0     | 1 |
| 3197 | PGF     | ENST00000405431 | p.E129G | c.386  | 1.014988502 | 0     | 1 |
| 3198 | THBS1   | ENST00000260356 | p.I945T | c.2834 | 0.021389396 | 5.718 | 1 |
| 3198 | THBS1   | ENST00000260356 | p.D956N | c.2866 | 0.128260726 | 2.99  | 1 |

|      |        |                 |           |             |             |       |   |
|------|--------|-----------------|-----------|-------------|-------------|-------|---|
| 3198 | THBS1  | ENST00000260356 | p.D1001N  | c.3001      | 0.144867558 | 0     | 1 |
| 3200 | MGAM   | ENST00000475668 | p.L871F   | c.2611      | 1.096272805 | 0     | 1 |
| 3200 | MGAM   | ENST00000475668 | p.L871I   | c.2611      | 1.096272805 | 0     | 1 |
| 3200 | MGAM   | ENST00000475668 | p.I886T   | c.2657      | 0.112005512 | 6.9   | 1 |
| 3200 | MGAM   | ENST00000475668 | p.G947E   | c.2840      | 0.271058202 | 3.508 | 1 |
| 3201 | SMS    | ENST00000404933 | p.L295I   | c.883       | 0.00805444  | 0     | 1 |
| 3201 | SMS    | ENST00000404933 | p.A324S   | c.970       | 0.00805444  | 6.956 | 1 |
| 3202 | CASP8  | ENST00000358485 | p.G421E   | c.1262      | 0.124653906 | 3.004 | 1 |
| 3202 | CASP8  | ENST00000358485 | p.V469A   | c.1406      | 0.124653906 | 0     | 1 |
| 3203 | AKR1B1 | ENST00000285930 | p.Y40H    | c.118       | 0.109196612 | 4.195 | 1 |
| 3203 | AKR1B1 | ENST00000285930 | p.R269H   | c.806       | 1.054598306 | 0     | 2 |
| 3204 | NLRX1  | ENST00000292199 | p.G723R   | c.2167      | 0.00482251  | 7.696 | 1 |
| 3204 | NLRX1  | ENST00000292199 | p.P747L   | c.2240      | 0.00482251  | 0     | 1 |
| 3205 | CYP3A4 | ENST00000336411 | p.D194N   | c.580       | 0.00977966  | 6.676 | 1 |
| 3205 | CYP3A4 | ENST00000336411 | p.F219L   | c.657       | 0.00977966  | 0     | 1 |
| 3206 | RNASE4 | ENST00000304704 | p.R38Q    | c.113       | 0.073099229 | 3.774 | 1 |
| 3206 | RNASE4 | ENST00000304704 | p.I90T    | c.269       | 0.086183705 | 0     | 1 |
| 3206 | RNASE4 | ENST00000304704 | p.V131I   | c.391       | 0.043904248 | 6.256 | 1 |
| 3207 | PABPC3 | ENST00000281589 | p.V338E   | c.1013      | 0.082640913 | 3.597 | 1 |
| 3207 | PABPC3 | ENST00000281589 | p.R311W   | c.931       | 0.082640913 | 0     | 1 |
| 3208 | CLK1   | ENST00000434813 | p.P441R   | c.1322      | 0.039172907 | 0     | 1 |
| 3208 | CLK1   | ENST00000434813 | p.D503N   | c.1507      | 0.039172907 | 4.674 | 1 |
| 3209 | TTN    | ENST00000589042 | p.L35132I | c.105394    | 0.040553383 | 4.922 | 1 |
| 3209 | TTN    | ENST00000589042 | p.P35158T | c.105472    | 0.262396024 | 0     | 1 |
| 3209 | TTN    | ENST00000589042 | p.N35205S | c.105614    | 0.2369773   | 2.124 | 1 |
| 3210 | CYP2C9 | ENST00000260682 | p.F448L   | c.1344      | 0.168670681 | 0     | 1 |
| 3210 | CYP2C9 | ENST00000260682 | p.A149T   | c.445       | 0.10900898  | 3.573 | 1 |
| 3210 | CYP2C9 | ENST00000260682 | p.L152F   | c.454       | 0.119517892 | 3.589 | 1 |
| 3210 | CYP2C9 | ENST00000260682 | p.R186C   | c.556       | 0.028358049 | 9.34  | 1 |
| 3211 | GINS2  | ENST00000253462 | p.L46M    | c.136       | 0.031271668 | 4.999 | 1 |
| 3211 | GINS2  | ENST00000253462 | p.E94G    | c.281       | 0.031271668 | 0     | 1 |
| 3212 | TAT    | ENST00000355962 | p.G180R   | c.538       | 1.007345111 | 0     | 1 |
| 3212 | TAT    | ENST00000355962 | p.G180E   | c.539       | 1.007345111 | 0     | 1 |
| 3212 | TAT    | ENST00000355962 | p.R315S   | c.943       | 0.035207739 | 7.089 | 1 |
| 3213 | PAK7   | ENST00000378423 | p.E542K   | c.1624      | 0.009125046 | 6.962 | 1 |
| 3213 | PAK7   | ENST00000378423 | p.T547N   | c.1640      | 0.138746734 | 2.861 | 1 |
| 3213 | PAK7   | ENST00000378423 | p.G704V   | c.2111      | 0.145663712 | 0     | 1 |
| 3214 | FERMT3 | ENST00000279227 | p.R360H   | c.1079      | 0.080604266 | 0     | 1 |
| 3214 | FERMT3 | ENST00000279227 | p.P395H   | c.1184      | 0.080604266 | 3.633 | 1 |
| 3215 | THOP1  | ENST00000307741 | p.V496M   | c.1486      | 0.01510322  | 0     | 1 |
| 3215 | THOP1  | ENST00000307741 | p.G649F   | c.1945_1946 | 0.01510322  | 6.049 | 1 |
| 3216 | HSPA6  | ENST00000309758 | p.F70L    | c.210       | 0.010435239 | 8.12  | 1 |
| 3216 | HSPA6  | ENST00000309758 | p.R266H   | c.797       | 1.003594483 | 0     | 2 |
| 3217 | RNASE4 | ENST00000304704 | p.R51C    | c.151       | 0.014160343 | 6.142 | 1 |
| 3217 | RNASE4 | ENST00000304704 | p.S115F   | c.344       | 0.014160343 | 0     | 1 |
| 3218 | VAV1   | ENST00000602142 | p.E372K   | c.1114      | 0.010089511 | 6.631 | 1 |
| 3218 | VAV1   | ENST00000602142 | p.F540V   | c.1618      | 0.010089511 | 0     | 1 |
| 3219 | LRRRC4 | ENST00000249363 | p.R150Q   | c.449       | 0.270010359 | 0     | 1 |
| 3219 | LRRRC4 | ENST00000249363 | p.S172F   | c.515       | 0.133765355 | 3.109 | 1 |

|              |                 |                    |           |             |       |   |
|--------------|-----------------|--------------------|-----------|-------------|-------|---|
| 3219 LRRC4   | ENST00000249363 | p.R175H            | c.524     | 0.17732641  | 2.698 | 1 |
| 3220 ALB     | ENST00000295897 | p.R434C            | c.1300    | 1.166829236 | 0     | 2 |
| 3220 ALB     | ENST00000295897 | p.S513L            | c.1538    | 0.164061135 | 3.67  | 1 |
| 3220 ALB     | ENST00000295897 | p.V517L            | c.1549    | 0.194264953 | 3.502 | 1 |
| 3221 BROX    | ENST00000340934 | p.Q186E            | c.556     | 0.02185395  | 5.629 | 1 |
| 3221 BROX    | ENST00000340934 | p.Q188R            | c.563     | 0.083150107 | 3.617 | 1 |
| 3221 BROX    | ENST00000340934 | p.F219S            | c.656     | 0.101710186 | 0     | 1 |
| 3222 RPS27A  | ENST00000272317 | p.Y59C             | c.176     | 0.005306587 | 7.558 | 1 |
| 3222 RPS27A  | ENST00000272317 | p.S20W             | c.59      | 0.005306587 | 0     | 1 |
| 3223 PPP2CA  | ENST00000481195 | p.T112A            | c.334     | 0.037369369 | 4.742 | 1 |
| 3223 PPP2CA  | ENST00000481195 | p.P154S            | c.460     | 0.037369369 | 0     | 1 |
| 3224 PPP2R2A | ENST00000315985 | p.S89G             | c.265     | 0.013807533 | 0     | 1 |
| 3224 PPP2R2A | ENST00000315985 | p.P178S            | c.532     | 0.012259127 | 6.35  | 1 |
| 3224 PPP2R2A | ENST00000315985 | p.R179Q            | c.536     | 0.001548407 | 9.335 | 1 |
| 3225 MAOA    | ENST00000338702 | p.V17L             | c.49      | 0.030380919 | 0     | 1 |
| 3225 MAOA    | ENST00000338702 | p.I254V            | c.760     | 0.011382806 | 6.457 | 1 |
| 3225 MAOA    | ENST00000338702 | p.K267T            | c.800     | 0.018998114 | 5.718 | 1 |
| 3226 EEF1A1  | ENST00000316292 | p.K5N              | c.15      | 0.151144459 | 2.726 | 1 |
| 3226 EEF1A1  | ENST00000316292 | p.S83in_frame_del  | c.250_248 | 0.151144459 | 0     | 1 |
| 3227 VWF     | ENST00000261405 | p.K1720N           | c.5160    | 1.145591698 | 0     | 2 |
| 3227 VWF     | ENST00000261405 | p.G1864D           | c.5591    | 0.291183397 | 2.78  | 1 |
| 3228 PRDM12  | ENST00000253008 | p.S94C             | c.281     | 0.035402621 | 0     | 1 |
| 3228 PRDM12  | ENST00000253008 | p.R168C            | c.502     | 0.035402621 | 4.82  | 1 |
| 3229 MERTK   | ENST00000295408 | p.V418L            | c.1252    | 0.058475202 | 0     | 1 |
| 3229 MERTK   | ENST00000295408 | p.G467R            | c.1399    | 0.03890232  | 4.684 | 1 |
| 3229 MERTK   | ENST00000295408 | p.G468R            | c.1402    | 0.019572882 | 5.675 | 1 |
| 3230 ARG2    | ENST00000261783 | p.G118in_frame_del | c.349_351 | 0.040554336 | 0     | 1 |
| 3230 ARG2    | ENST00000261783 | p.V297A            | c.890     | 0.040554336 | 4.624 | 1 |
| 3231 DLC1    | ENST00000276297 | p.R1086C           | c.3256    | 0.170636715 | 0     | 1 |
| 3231 DLC1    | ENST00000276297 | p.R1121Q           | c.3362    | 0.170636715 | 2.551 | 1 |
| 3232 HEXA    | ENST00000566304 | p.R148G            | c.442     | 0.158596643 | 0     | 1 |
| 3232 HEXA    | ENST00000566304 | p.R181Q            | c.542     | 0.074754448 | 3.863 | 1 |
| 3232 HEXA    | ENST00000566304 | p.L198M            | c.592     | 0.026705917 | 8.859 | 1 |
| 3232 HEXA    | ENST00000566304 | p.R260W            | c.778_777 | 0.118297687 | 3.511 | 1 |
| 3233 KLRC1   | ENST00000359151 | p.E141K            | c.421     | 0.006279811 | 8.368 | 1 |
| 3233 KLRC1   | ENST00000359151 | p.R179C            | c.535     | 0.049289697 | 0     | 1 |
| 3233 KLRC1   | ENST00000359151 | p.D200Y            | c.598     | 0.046262916 | 4.434 | 1 |
| 3234 SPARC   | ENST00000231061 | p.R168L            | c.503     | 0.036494271 | 6.578 | 1 |
| 3234 SPARC   | ENST00000231061 | p.E221K            | c.661     | 1.010467059 | 0     | 1 |
| 3234 SPARC   | ENST00000231061 | p.E221D            | c.663     | 1.010467059 | 0     | 1 |
| 3235 NTRK1   | ENST00000524377 | p.R342Q            | c.1025    | 1.010926688 | 0     | 2 |
| 3235 NTRK1   | ENST00000524377 | p.P309S            | c.925     | 0.033810382 | 6.516 | 1 |
| 3236 TRMT61B | ENST00000306108 | p.A357D            | c.1070    | 0.012824088 | 0     | 1 |
| 3236 TRMT61B | ENST00000306108 | p.L466I            | c.1396    | 0.012824088 | 6.285 | 1 |
| 3237 UPF2    | ENST00000357604 | p.A540T            | c.1618    | 0.008093615 | 0     | 1 |
| 3237 UPF2    | ENST00000357604 | p.R606W            | c.1816    | 0.008093615 | 6.949 | 1 |
| 3238 RAB8A   | ENST00000586682 | p.A152T            | c.454     | 1.152512564 | 0     | 1 |
| 3238 RAB8A   | ENST00000586682 | p.A152V            | c.455     | 1.152512564 | 0     | 1 |
| 3238 RAB8A   | ENST00000586682 | p.R27C             | c.79      | 0.305025128 | 2.713 | 1 |

|      |        |                 |          |           |             |       |   |
|------|--------|-----------------|----------|-----------|-------------|-------|---|
| 3239 | GLOD4  | ENST00000301328 | p.R145C  | c.433     | 0.09985649  | 3.324 | 1 |
| 3239 | GLOD4  | ENST00000301328 | p.A188V  | c.563     | 0.09985649  | 0     | 1 |
| 3240 | PLEC   | ENST00000322810 | p.V777E  | c.2330    | 0.006528648 | 7.259 | 1 |
| 3240 | PLEC   | ENST00000322810 | p.V988M  | c.2962    | 0.006528648 | 0     | 1 |
| 3241 | TLR4   | ENST00000355622 | p.D60N   | c.177_178 | 1.012502416 | 0     | 1 |
| 3241 | TLR4   | ENST00000355622 | p.D60E   | c.180     | 1.012502416 | 0     | 1 |
| 3241 | TLR4   | ENST00000355622 | p.I108V  | c.322     | 0.014998895 | 7.059 | 1 |
| 3241 | TLR4   | ENST00000355622 | p.V30M   | c.88      | 0.010005936 | 7.643 | 1 |
| 3242 | NCAM2  | ENST00000400546 | p.Q616K  | c.1846    | 0.437693625 | 3.624 | 1 |
| 3242 | NCAM2  | ENST00000400546 | p.P677L  | c.2030    | 1.103452188 | 0     | 2 |
| 3242 | NCAM2  | ENST00000400546 | p.T678R  | c.2033    | 0.32016331  | 5.484 | 1 |
| 3243 | WWC1   | ENST00000521089 | p.I662V  | c.1984    | 0.024478954 | 6.295 | 1 |
| 3243 | WWC1   | ENST00000521089 | p.V700M  | c.2098    | 0.038499333 | 5.224 | 1 |
| 3243 | WWC1   | ENST00000521089 | p.D747N  | c.2239    | 0.039491389 | 0     | 1 |
| 3244 | FECH   | ENST00000382873 | p.L337F  | c.1009    | 0.007807087 | 0     | 1 |
| 3244 | FECH   | ENST00000382873 | p.R304Q  | c.911     | 0.007807087 | 7.001 | 1 |
| 3245 | NOVA1  | ENST00000539517 | p.L55I   | c.163     | 0.090377802 | 0     | 1 |
| 3245 | NOVA1  | ENST00000539517 | p.Y92C   | c.275     | 0.06119837  | 4.486 | 1 |
| 3245 | NOVA1  | ENST00000539517 | p.T193S  | c.577     | 0.062325924 | 4.45  | 1 |
| 3246 | DDB1   | ENST00000301764 | p.I178V  | c.532     | 0.02012315  | 5.635 | 1 |
| 3246 | DDB1   | ENST00000301764 | p.P206L  | c.617     | 0.052542523 | 0     | 1 |
| 3246 | DDB1   | ENST00000301764 | p.G242D  | c.725     | 0.032419373 | 4.947 | 1 |
| 3247 | RRM2   | ENST00000360566 | p.M375I  | c.1125    | 0.112500241 | 0     | 1 |
| 3247 | RRM2   | ENST00000360566 | p.W305C  | c.915     | 0.112500241 | 3.152 | 1 |
| 3248 | IL10RA | ENST00000227752 | p.R165Q  | c.494     | 0.009499057 | 0     | 1 |
| 3248 | IL10RA | ENST00000227752 | p.N189K  | c.567     | 0.009499057 | 6.718 | 1 |
| 3249 | RND1   | ENST00000309739 | p.R130Q  | c.389     | 0.007625248 | 0     | 1 |
| 3249 | RND1   | ENST00000309739 | p.G167D  | c.500     | 0.007625248 | 7.035 | 1 |
| 3250 | GOT1   | ENST00000370508 | p.V50A   | c.149     | 0.018236845 | 0     | 1 |
| 3250 | GOT1   | ENST00000370508 | p.G262W  | c.784     | 0.018236845 | 5.777 | 1 |
| 3251 | XDH    | ENST00000379416 | p.A1084T | c.3250    | 0.064034801 | 0     | 1 |
| 3251 | XDH    | ENST00000379416 | p.A1253V | c.3758    | 0.064034801 | 3.965 | 1 |
| 3252 | PTK2B  | ENST00000544172 | p.R68W   | c.202     | 0.155717177 | 0     | 1 |
| 3252 | PTK2B  | ENST00000544172 | p.T110M  | c.329     | 0.155717177 | 2.683 | 1 |
| 3253 | MERTK  | ENST00000295408 | p.D706N  | c.2116    | 0.017181502 | 0     | 1 |
| 3253 | MERTK  | ENST00000295408 | p.R851G  | c.2551    | 0.017181502 | 5.863 | 1 |
| 3254 | LDLR   | ENST00000557933 | p.V430A  | c.1289    | 0.19959574  | 0     | 1 |
| 3254 | LDLR   | ENST00000557933 | p.D477N  | c.1429    | 0.117369775 | 3.346 | 1 |
| 3254 | LDLR   | ENST00000557933 | p.E650V  | c.1949    | 0.120274903 | 3.304 | 1 |
| 3255 | PCSK9  | ENST00000302118 | p.E195K  | c.583     | 0.327493005 | 0     | 1 |
| 3255 | PCSK9  | ENST00000302118 | p.G232R  | c.694     | 0.079584624 | 3.99  | 1 |
| 3255 | PCSK9  | ENST00000302118 | p.G236D  | c.707     | 0.137808622 | 3.139 | 1 |
| 3255 | PCSK9  | ENST00000302118 | p.R237Q  | c.710     | 0.177691185 | 2.727 | 1 |
| 3256 | CHN2   | ENST00000539406 | p.N126K  | c.378     | 0.042972022 | 4.66  | 1 |
| 3256 | CHN2   | ENST00000539406 | p.R133I  | c.398     | 0.089806641 | 3.533 | 1 |
| 3256 | CHN2   | ENST00000539406 | p.G165E  | c.494     | 0.125944406 | 0     | 1 |
| 3257 | NEK1   | ENST00000507142 | p.A115P  | c.343     | 0.006070369 | 0     | 1 |
| 3257 | NEK1   | ENST00000507142 | p.L266I  | c.796     | 0.006070369 | 7.364 | 1 |
| 3258 | AP1B1  | ENST00000405198 | p.A381T  | c.1141    | 0.013621222 | 6.198 | 1 |

|             |                 |                     |             |             |       |   |
|-------------|-----------------|---------------------|-------------|-------------|-------|---|
| 3258 AP1B1  | ENST00000405198 | p.E550K             | c.1648      | 0.013621222 | 0     | 1 |
| 3259 MMP9   | ENST00000372330 | p.G367R             | c.1099      | 0.199712979 | 2.324 | 1 |
| 3259 MMP9   | ENST00000372330 | p.L28P              | c.83        | 0.199712979 | 0     | 1 |
| 3260 DPEP1  | ENST00000261615 | p.N279S             | c.836       | 0.010832391 | 6.726 | 1 |
| 3260 DPEP1  | ENST00000261615 | p.S281F             | c.842       | 0.148091885 | 2.769 | 1 |
| 3260 DPEP1  | ENST00000261615 | p.R331K             | c.992       | 0.156152551 | 0     | 1 |
| 3262 MAGI2  | ENST00000354212 | p.L1004I            | c.3010      | 0.330095927 | 1.934 | 1 |
| 3262 MAGI2  | ENST00000354212 | p.R1005C            | c.3013      | 0.329733381 | 1.936 | 1 |
| 3262 MAGI2  | ENST00000354212 | p.L1033M            | c.3097      | 0.523042596 | 0     | 1 |
| 3263 EFNA5  | ENST00000333274 | p.V82M              | c.244       | 0.00431926  | 7.855 | 1 |
| 3263 EFNA5  | ENST00000333274 | p.D91N              | c.271       | 0.029977004 | 5.06  | 1 |
| 3263 EFNA5  | ENST00000333274 | p.C151R             | c.451       | 0.034296264 | 0     | 1 |
| 3264 PC     | ENST00000393958 | p.E896D             | c.2688      | 0.151952425 | 0     | 1 |
| 3264 PC     | ENST00000393958 | p.S927N             | c.2780      | 0.052913242 | 4.383 | 1 |
| 3264 PC     | ENST00000393958 | p.R928L             | c.2783      | 0.121958046 | 3.265 | 1 |
| 3265 NOTCH1 | ENST00000277541 | p.C416F             | c.1247      | 0.008887541 | 6.814 | 1 |
| 3265 NOTCH1 | ENST00000277541 | p.2439in_frame_insG | c.7314_7313 | 0.008887541 | 0     | 1 |
| 3266 CHRNB2 | ENST00000368476 | p.L60F              | c.178       | 0.120724517 | 0     | 1 |
| 3266 CHRNB2 | ENST00000368476 | p.Q85K              | c.253       | 0.113204248 | 3.143 | 1 |
| 3266 CHRNB2 | ENST00000368476 | p.R174C             | c.520       | 0.007520269 | 7.055 | 1 |
| 3267 ADAM22 | ENST00000315984 | p.H528R             | c.1583      | 0.103664943 | 3.27  | 1 |
| 3267 ADAM22 | ENST00000315984 | p.S695N             | c.2084      | 0.103664943 | 0     | 1 |
| 3268 PTPRM  | ENST00000400060 | p.G1114W            | c.3340      | 0.01286861  | 0     | 1 |
| 3268 PTPRM  | ENST00000400060 | p.V1149G            | c.3446      | 0.01286861  | 6.28  | 1 |
| 3269 TOP3A  | ENST00000321105 | p.A344V             | c.1031      | 0.074222479 | 0     | 1 |
| 3269 TOP3A  | ENST00000321105 | p.A539V             | c.1616      | 0.074222479 | 3.752 | 1 |
| 3270 CLK2   | ENST00000536801 | p.Y262C             | c.785       | 0.009973389 | 0     | 1 |
| 3270 CLK2   | ENST00000536801 | p.D302H             | c.904       | 0.001483273 | 9.397 | 1 |
| 3270 CLK2   | ENST00000536801 | p.R316H             | c.947       | 0.008490116 | 6.88  | 1 |
| 3271 KCNMA1 | ENST00000404771 | p.R771Q             | c.2312      | 0.015030116 | 0     | 1 |
| 3271 KCNMA1 | ENST00000404771 | p.A853T             | c.2557      | 0.015030116 | 6.056 | 1 |
| 3272 RAB6B  | ENST00000285208 | p.S100F             | c.299       | 0.08099631  | 3.626 | 1 |
| 3272 RAB6B  | ENST00000285208 | p.V24G              | c.71        | 0.08099631  | 0     | 1 |
| 3273 ELMO1  | ENST00000442504 | p.S580L             | c.1739      | 0.007845059 | 6.994 | 1 |
| 3273 ELMO1  | ENST00000442504 | p.D602N             | c.1804      | 0.007845059 | 0     | 1 |
| 3275 ZAP70  | ENST00000264972 | p.P421Q             | c.1262      | 0.074770658 | 3.772 | 1 |
| 3275 ZAP70  | ENST00000264972 | p.R465H             | c.1394      | 0.094648831 | 0     | 1 |
| 3275 ZAP70  | ENST00000264972 | p.Y506H             | c.1516      | 0.023018216 | 5.543 | 1 |
| 3276 PFKM   | ENST00000340802 | p.G532R             | c.1594      | 0.079384436 | 0     | 1 |
| 3276 PFKM   | ENST00000340802 | p.R744M             | c.2231      | 0.079384436 | 3.655 | 1 |
| 3277 HMGCS2 | ENST00000369406 | p.A399S             | c.1195      | 0.027057244 | 0     | 1 |
| 3277 HMGCS2 | ENST00000369406 | p.Q427K             | c.1279      | 0.011048543 | 6.5   | 1 |
| 3277 HMGCS2 | ENST00000369406 | p.A430D             | c.1289      | 0.0160087   | 5.965 | 1 |
| 3278 AIM2   | ENST00000368130 | p.I337in_frame_del  | c.1012_1010 | 0.022939854 | 0     | 1 |
| 3278 AIM2   | ENST00000368130 | p.G307R             | c.919       | 0.022939854 | 5.446 | 1 |
| 3279 EGLN1  | ENST00000366641 | p.D392G             | c.1175      | 0.126441028 | 3.225 | 1 |
| 3279 EGLN1  | ENST00000366641 | p.V412G             | c.1235      | 0.201742822 | 2.456 | 1 |
| 3279 EGLN1  | ENST00000366641 | p.G294S             | c.880       | 0.289200551 | 0     | 1 |
| 3280 CTSB   | ENST00000236671 | p.W383C             | c.1149      | 0.090058109 | 3.473 | 1 |

|      |        |                 |          |           |             |       |   |
|------|--------|-----------------|----------|-----------|-------------|-------|---|
| 3280 | CTSD   | ENST00000236671 | p.P304L  | c.911_910 | 0.090058109 | 0     | 1 |
| 3281 | CST5   | ENST00000304710 | p.D62N   | c.184     | 0.152195752 | 0     | 1 |
| 3281 | CST5   | ENST00000304710 | p.R92Q   | c.275     | 0.152195752 | 2.716 | 1 |
| 3283 | MUTYH  | ENST00000450313 | p.D236A  | c.707     | 0.005734963 | 7.446 | 1 |
| 3283 | MUTYH  | ENST00000450313 | p.R241W  | c.721     | 0.046102858 | 4.439 | 1 |
| 3283 | MUTYH  | ENST00000450313 | p.A287D  | c.860     | 0.051837821 | 0     | 1 |
| 3284 | CA4    | ENST00000300900 | p.V40A   | c.119     | 0.026314467 | 5.248 | 1 |
| 3284 | CA4    | ENST00000300900 | p.R215I  | c.644_645 | 0.026314467 | 0     | 1 |
| 3285 | AGTR1  | ENST00000404754 | p.G45R   | c.133     | 0.015538596 | 6.008 | 1 |
| 3285 | AGTR1  | ENST00000404754 | p.V52A   | c.155     | 0.055552668 | 4.17  | 1 |
| 3285 | AGTR1  | ENST00000404754 | p.F313C  | c.938     | 0.071091264 | 0     | 1 |
| 3286 | KCNK1  | ENST00000366621 | p.P199L  | c.596     | 0.001544119 | 9.339 | 1 |
| 3286 | KCNK1  | ENST00000366621 | p.C251Y  | c.752     | 0.001544119 | 0     | 1 |
| 3287 | TRAF6  | ENST00000348124 | p.H376Y  | c.1126    | 0.105726569 | 3.317 | 1 |
| 3287 | TRAF6  | ENST00000348124 | p.M414I  | c.1242    | 0.059044735 | 4.22  | 1 |
| 3287 | TRAF6  | ENST00000348124 | p.R466W  | c.1396    | 0.154002513 | 0     | 1 |
| 3288 | ABL2   | ENST00000502732 | p.A443T  | c.1327    | 0.078781462 | 0     | 1 |
| 3288 | ABL2   | ENST00000502732 | p.F471C  | c.1412    | 0.078781462 | 3.666 | 1 |
| 3289 | BLM    | ENST00000355112 | p.D1076G | c.3227    | 0.095977588 | 3.407 | 1 |
| 3289 | BLM    | ENST00000355112 | p.D1079N | c.3235    | 0.019777086 | 5.79  | 1 |
| 3289 | BLM    | ENST00000355112 | p.V1187L | c.3559    | 0.112347008 | 0     | 1 |
| 3290 | FGFR2  | ENST00000457416 | p.L561F  | c.1681    | 1.028458432 | 0     | 2 |
| 3290 | FGFR2  | ENST00000457416 | p.P709S  | c.2125    | 0.056916865 | 5.135 | 1 |
| 3291 | NUDC   | ENST00000321265 | p.Y172H  | c.514     | 0.007731693 | 7.015 | 1 |
| 3291 | NUDC   | ENST00000321265 | p.P262S  | c.784     | 0.007731693 | 0     | 1 |
| 3292 | ITGAV  | ENST00000261023 | p.Q664E  | c.1990    | 0.032307211 | 4.952 | 1 |
| 3292 | ITGAV  | ENST00000261023 | p.A719T  | c.2155    | 0.032307211 | 0     | 1 |
| 3293 | FLT1   | ENST00000282397 | p.P143S  | c.427     | 0.022377743 | 5.624 | 1 |
| 3293 | FLT1   | ENST00000282397 | p.L169S  | c.506     | 0.105693688 | 3.271 | 1 |
| 3293 | FLT1   | ENST00000282397 | p.T176I  | c.527     | 0.009394291 | 6.734 | 1 |
| 3293 | FLT1   | ENST00000282397 | p.T206N  | c.617     | 0.133264572 | 0     | 1 |
| 3294 | GRASP  | ENST00000293662 | p.K106M  | c.317     | 0.011605882 | 0     | 1 |
| 3294 | GRASP  | ENST00000293662 | p.L182I  | c.544     | 0.011605882 | 6.429 | 1 |
| 3295 | NUDT21 | ENST00000300291 | p.D143G  | c.428     | 0.09944206  | 3.33  | 1 |
| 3295 | NUDT21 | ENST00000300291 | p.L33R   | c.98      | 0.09944206  | 0     | 1 |
| 3296 | BCHE   | ENST00000264381 | p.P429S  | c.1285    | 0.047970859 | 4.9   | 1 |
| 3296 | BCHE   | ENST00000264381 | p.H466Q  | c.1398    | 0.025612644 | 5.287 | 1 |
| 3296 | BCHE   | ENST00000264381 | p.W259C  | c.777     | 0.082204978 | 0     | 1 |
| 3296 | BCHE   | ENST00000264381 | p.P320A  | c.958     | 0.023099413 | 5.436 | 1 |
| 3297 | CHI3L1 | ENST00000255409 | p.L94F   | c.282     | 0.083248887 | 0     | 1 |
| 3297 | CHI3L1 | ENST00000255409 | p.L127V  | c.379     | 0.069637103 | 3.844 | 1 |
| 3297 | CHI3L1 | ENST00000255409 | p.H130N  | c.388     | 0.013611784 | 6.199 | 1 |
| 3298 | ENPEP  | ENST00000265162 | p.P564Q  | c.1691    | 0.024501264 | 5.351 | 1 |
| 3298 | ENPEP  | ENST00000265162 | p.R667I  | c.2000    | 0.051724833 | 0     | 1 |
| 3298 | ENPEP  | ENST00000265162 | p.T931I  | c.2792    | 0.027223569 | 5.199 | 1 |
| 3299 | ENPP4  | ENST00000321037 | p.Y94H   | c.280     | 0.101074719 | 4.39  | 1 |
| 3299 | ENPP4  | ENST00000321037 | p.W112S  | c.335     | 0.244008155 | 3.069 | 1 |
| 3299 | ENPP4  | ENST00000321037 | p.R310Q  | c.929     | 1.166857918 | 0     | 2 |
| 3300 | PIP    | ENST00000291009 | p.A88S   | c.262     | 0.00379417  | 8.042 | 1 |

|               |                 |          |             |             |       |   |
|---------------|-----------------|----------|-------------|-------------|-------|---|
| 3300 PIP      | ENST00000291009 | p.C91W   | c.273       | 0.006003419 | 7.38  | 1 |
| 3300 PIP      | ENST00000291009 | p.P124T  | c.370       | 0.009797589 | 0     | 1 |
| 3301 FABP2    | ENST00000274024 | p.G76E   | c.227       | 1.124424912 | 0     | 2 |
| 3301 FABP2    | ENST00000274024 | p.E102K  | c.304       | 0.218904802 | 3.203 | 1 |
| 3301 FABP2    | ENST00000274024 | p.V119A  | c.356       | 0.051183274 | 5.981 | 1 |
| 3302 SAMHD1   | ENST00000262878 | p.R348C  | c.1042      | 0.025768972 | 0     | 1 |
| 3302 SAMHD1   | ENST00000262878 | p.H517Y  | c.1549      | 0.017003788 | 5.878 | 1 |
| 3302 SAMHD1   | ENST00000262878 | p.A529K  | c.1586_1585 | 0.008765183 | 6.834 | 1 |
| 3303 ACADSB   | ENST00000358776 | p.T155R  | c.464       | 0.014864348 | 6.072 | 1 |
| 3303 ACADSB   | ENST00000358776 | p.A273V  | c.818       | 0.014864348 | 0     | 1 |
| 3304 GSTA1    | ENST00000334575 | p.M105I  | c.315       | 0.139570043 | 6.093 | 1 |
| 3304 GSTA1    | ENST00000334575 | p.K127N  | c.381       | 0.105745067 | 9.376 | 1 |
| 3304 GSTA1    | ENST00000334575 | p.R131C  | c.391       | 1.01615457  | 0     | 1 |
| 3304 GSTA1    | ENST00000334575 | p.R131H  | c.392       | 1.01615457  | 0     | 1 |
| 3305 ACACB    | ENST00000338432 | p.H589N  | c.1765      | 0.028735939 | 0     | 1 |
| 3305 ACACB    | ENST00000338432 | p.F704L  | c.2112      | 0.028735939 | 5.121 | 1 |
| 3306 HDAC4    | ENST00000345617 | p.Q85E   | c.253       | 0.036906021 | 4.76  | 1 |
| 3306 HDAC4    | ENST00000345617 | p.Q107K  | c.319       | 0.036906021 | 0     | 1 |
| 3307 F7       | ENST00000375581 | p.R462P  | c.1385      | 0.037551127 | 4.735 | 1 |
| 3307 F7       | ENST00000375581 | p.P291R  | c.872       | 0.037551127 | 0     | 1 |
| 3308 SEMA4D   | ENST00000438547 | p.E462K  | c.1384      | 0.048011306 | 4.585 | 1 |
| 3308 SEMA4D   | ENST00000438547 | p.E628K  | c.1882      | 0.158647005 | 2.715 | 1 |
| 3308 SEMA4D   | ENST00000438547 | p.R29Q   | c.86        | 0.193966867 | 0     | 1 |
| 3309 AASDHPPT | ENST00000278618 | p.E73D   | c.219       | 0.065380309 | 0     | 1 |
| 3309 AASDHPPT | ENST00000278618 | p.S280F  | c.839       | 0.065380309 | 3.935 | 1 |
| 3310 MTA1     | ENST00000331320 | p.A201V  | c.602       | 0.007139308 | 7.13  | 1 |
| 3310 MTA1     | ENST00000331320 | p.H202R  | c.605       | 0.002562913 | 8.608 | 1 |
| 3310 MTA1     | ENST00000331320 | p.H259Y  | c.775       | 0.009702221 | 0     | 1 |
| 3311 BCHE     | ENST00000264381 | p.L264V  | c.790       | 0.241986757 | 0     | 1 |
| 3311 BCHE     | ENST00000264381 | p.V322M  | c.964       | 0.241986757 | 2.047 | 1 |
| 3312 DSP      | ENST00000379802 | p.L2350V | c.7048      | 0.042071877 | 4.571 | 1 |
| 3312 DSP      | ENST00000379802 | p.Q2371R | c.7112      | 0.042071877 | 0     | 1 |
| 3313 CBS      | ENST00000352178 | p.E283K  | c.847       | 0.029646385 | 0     | 1 |
| 3313 CBS      | ENST00000352178 | p.G307S  | c.919       | 0.029646385 | 5.076 | 1 |
| 3314 AK5      | ENST00000354567 | p.D345N  | c.1033      | 0.003192716 | 8.291 | 1 |
| 3314 AK5      | ENST00000354567 | p.L452F  | c.1354      | 0.012502736 | 0     | 1 |
| 3314 AK5      | ENST00000354567 | p.P506H  | c.1517      | 0.00931002  | 6.747 | 1 |
| 3315 AGO2     | ENST00000220592 | p.Y625C  | c.1874      | 0.127787959 | 0     | 1 |
| 3315 AGO2     | ENST00000220592 | p.P802R  | c.2405      | 0.115067537 | 3.14  | 1 |
| 3315 AGO2     | ENST00000220592 | p.Y857C  | c.2570      | 0.029502842 | 6.123 | 1 |
| 3316 XRCC6    | ENST00000405878 | p.V482M  | c.1444      | 0.054108535 | 4.208 | 1 |
| 3316 XRCC6    | ENST00000405878 | p.K282N  | c.846       | 0.054108535 | 0     | 1 |
| 3317 QPCT     | ENST00000338415 | p.H360R  | c.1079      | 0.036549615 | 4.774 | 1 |
| 3317 QPCT     | ENST00000338415 | p.D190V  | c.569       | 0.036549615 | 0     | 1 |
| 3318 LIN28B   | ENST00000345080 | p.M41I   | c.123       | 0.029831907 | 0     | 1 |
| 3318 LIN28B   | ENST00000345080 | p.H65D   | c.193       | 0.029831907 | 5.067 | 1 |
| 3319 XYLB     | ENST00000207870 | p.L195F  | c.585       | 0.20166044  | 2.31  | 1 |
| 3319 XYLB     | ENST00000207870 | p.M219V  | c.655       | 0.20166044  | 0     | 1 |
| 3320 PEG3     | ENST00000423103 | p.Y54N   | c.160       | 0.01270905  | 0     | 1 |

|               |                 |           |             |             |       |   |
|---------------|-----------------|-----------|-------------|-------------|-------|---|
| 3320 PEG3     | ENST00000423103 | p.E122D   | c.366       | 0.01270905  | 6.298 | 1 |
| 3321 CPM      | ENST00000338356 | p.V195L   | c.583       | 0.211435397 | 0     | 1 |
| 3321 CPM      | ENST00000338356 | p.G251C   | c.751       | 0.146376277 | 2.877 | 1 |
| 3321 CPM      | ENST00000338356 | p.T279M   | c.836       | 0.08556242  | 3.731 | 1 |
| 3322 SYK      | ENST00000375754 | p.K387R   | c.1160      | 2.108271004 | 0     | 2 |
| 3322 SYK      | ENST00000375754 | p.K387N   | c.1161      | 2.108271004 | 0     | 1 |
| 3322 SYK      | ENST00000375754 | p.R590Q   | c.1769      | 1.049483845 | 5.958 | 1 |
| 3322 SYK      | ENST00000375754 | p.R590H   | c.1769_1770 | 1.049483845 | 5.958 | 1 |
| 3322 SYK      | ENST00000375754 | p.T610A   | c.1828      | 0.230741935 | 3.716 | 1 |
| 3323 DPP4     | ENST00000360534 | p.I172S   | c.515       | 0.026278013 | 0     | 1 |
| 3323 DPP4     | ENST00000360534 | p.A213G   | c.638       | 0.026278013 | 5.25  | 1 |
| 3324 FOXO1    | ENST00000379561 | p.R214C   | c.640       | 0.018274807 | 0     | 1 |
| 3324 FOXO1    | ENST00000379561 | p.W237C   | c.711       | 0.018274807 | 5.774 | 1 |
| 3325 C1QB     | ENST00000314933 | p.R188W   | c.562       | 0.023099413 | 0     | 1 |
| 3325 C1QB     | ENST00000314933 | p.G219R   | c.655       | 0.023099413 | 5.436 | 1 |
| 3326 CDC25A   | ENST00000302506 | p.L376F   | c.1126      | 0.070707154 | 0     | 1 |
| 3326 CDC25A   | ENST00000302506 | p.V425A   | c.1274      | 0.070707154 | 3.822 | 1 |
| 3327 KLHL7    | ENST00000339077 | p.A379V   | c.1136      | 0.090936293 | 3.459 | 1 |
| 3327 KLHL7    | ENST00000339077 | p.E427G   | c.1280      | 0.090936293 | 0     | 1 |
| 3328 XDH      | ENST00000379416 | p.C43F    | c.128       | 0.086509357 | 3.531 | 1 |
| 3328 XDH      | ENST00000379416 | p.A72D    | c.215       | 0.086509357 | 0     | 1 |
| 3329 KLHL2    | ENST00000514860 | p.S345F   | c.1034      | 0.010866265 | 6.524 | 1 |
| 3329 KLHL2    | ENST00000514860 | p.G367V   | c.1100      | 0.069831156 | 0     | 1 |
| 3329 KLHL2    | ENST00000514860 | p.S558F   | c.1673      | 0.058964891 | 4.084 | 1 |
| 3330 F5       | ENST00000367796 | p.A369V   | c.1106      | 0.235104507 | 2.148 | 1 |
| 3330 F5       | ENST00000367796 | p.D372G   | c.1115      | 0.051492918 | 4.573 | 1 |
| 3330 F5       | ENST00000367796 | p.K679N   | c.2037      | 0.267638775 | 0     | 1 |
| 3331 TTN      | ENST00000589042 | p.K26078T | c.78233     | 0.05532211  | 4.176 | 1 |
| 3331 TTN      | ENST00000589042 | p.R26158K | c.78473     | 0.05532211  | 0     | 1 |
| 3332 RQCD1    | ENST00000273064 | p.R169Q   | c.506       | 0.031906629 | 4.97  | 1 |
| 3332 RQCD1    | ENST00000273064 | p.I212L   | c.634       | 0.031906629 | 0     | 1 |
| 3333 PPIC     | ENST00000306442 | p.D48G    | c.143       | 0.003549915 | 0     | 1 |
| 3333 PPIC     | ENST00000306442 | p.S192L   | c.575       | 0.003549915 | 8.138 | 1 |
| 3334 RPS4X    | ENST00000316084 | p.Y54C    | c.161       | 0.102806259 | 3.282 | 1 |
| 3334 RPS4X    | ENST00000316084 | p.E97Q    | c.289       | 0.102806259 | 0     | 1 |
| 3335 SERPINC1 | ENST00000367698 | p.L405R   | c.1214      | 0.009844509 | 6.832 | 1 |
| 3335 SERPINC1 | ENST00000367698 | p.R457K   | c.1370      | 0.130359211 | 0     | 1 |
| 3335 SERPINC1 | ENST00000367698 | p.Y95C    | c.284       | 0.122649034 | 3.04  | 1 |
| 3336 IL2RB    | ENST00000216223 | p.R41T    | c.122       | 0.176454413 | 6.86  | 1 |
| 3336 IL2RB    | ENST00000216223 | p.C46G    | c.136       | 0.236981364 | 0     | 1 |
| 3336 IL2RB    | ENST00000216223 | p.C74S    | c.220       | 0.067457847 | 4.116 | 1 |
| 3336 IL2RB    | ENST00000216223 | p.A85T    | c.253       | 0.236151485 | 2.559 | 1 |
| 3336 IL2RB    | ENST00000216223 | p.H159N   | c.475       | 0.131238738 | 9.954 | 1 |
| 3337 CRYBB1   | ENST00000215939 | p.W124Y   | c.372_371   | 0.02335702  | 5.42  | 1 |
| 3337 CRYBB1   | ENST00000215939 | p.A171T   | c.511       | 0.029608412 | 6.401 | 1 |
| 3337 CRYBB1   | ENST00000215939 | p.Y201C   | c.602       | 0.03519035  | 0     | 1 |
| 3338 FNBP1    | ENST00000446176 | p.D119N   | c.355       | 0.039664715 | 0     | 1 |
| 3338 FNBP1    | ENST00000446176 | p.K215N   | c.645       | 0.039664715 | 4.656 | 1 |
| 3339 FLT3     | ENST00000380982 | p.V843A   | c.2528      | 0.017565079 | 7.702 | 1 |



|      |          |                 |                      |             |             |       |   |
|------|----------|-----------------|----------------------|-------------|-------------|-------|---|
| 3339 | FLT3     | ENST00000380982 | p.P896L              | c.2687      | 1.004802496 | 0     | 2 |
| 3340 | CEP170   | ENST00000366542 | p.D92G               | c.275       | 0.007183985 | 7.121 | 1 |
| 3340 | CEP170   | ENST00000366542 | p.S11C               | c.31        | 0.007183985 | 0     | 1 |
| 3341 | MITD1    | ENST00000289359 | p.E40K               | c.118       | 0.075297726 | 0     | 1 |
| 3341 | MITD1    | ENST00000289359 | p.A15T               | c.43        | 0.015592542 | 6.003 | 1 |
| 3341 | MITD1    | ENST00000289359 | p.V18M               | c.52        | 0.059705184 | 4.066 | 1 |
| 3342 | BTN3A1   | ENST00000289361 | p.H381Q              | c.1143      | 0.014150531 | 0     | 1 |
| 3342 | BTN3A1   | ENST00000289361 | p.L501F              | c.1503      | 0.014150531 | 6.143 | 1 |
| 3343 | PTPN1    | ENST00000371621 | p.A69T               | c.205       | 0.113130434 | 6.191 | 1 |
| 3343 | PTPN1    | ENST00000371621 | p.I219T              | c.656       | 0.317993279 | 0     | 1 |
| 3343 | PTPN1    | ENST00000371621 | p.R257W              | c.769       | 0.260945965 | 2.831 | 1 |
| 3343 | PTPN1    | ENST00000371621 | p.M258I              | c.774       | 0.267513574 | 2.741 | 1 |
| 3343 | PTPN1    | ENST00000371621 | p.C32G               | c.94        | 0.111047687 | 6.139 | 1 |
| 3344 | PARP10   | ENST00000525773 | p.R834C              | c.2500      | 0.078508899 | 3.671 | 1 |
| 3344 | PARP10   | ENST00000525773 | p.R864C              | c.2590      | 0.078508899 | 0     | 1 |
| 3345 | FCGR1A   | ENST00000369168 | p.H101Q              | c.303       | 0.029117418 | 0     | 1 |
| 3345 | FCGR1A   | ENST00000369168 | p.G180V              | c.539       | 0.018504244 | 5.756 | 1 |
| 3345 | FCGR1A   | ENST00000369168 | p.I181L              | c.541       | 0.010613174 | 6.558 | 1 |
| 3346 | LACTB2   | ENST00000276590 | p.S162F              | c.485       | 0.002438146 | 0     | 1 |
| 3346 | LACTB2   | ENST00000276590 | p.S183Y              | c.548       | 0.002438146 | 8.68  | 1 |
| 3347 | EZH2     | ENST00000320356 | p.Y646N              | c.1936      | 2.076362069 | 0     | 2 |
| 3347 | EZH2     | ENST00000320356 | p.Y646F              | c.1938_1937 | 2.076362069 | 0     | 1 |
| 3347 | EZH2     | ENST00000320356 | p.R690H              | c.2069      | 0.229086207 | 3.711 | 1 |
| 3348 | CLASP1   | ENST00000263710 | p.P447H              | c.1340      | 0.077374393 | 0     | 1 |
| 3348 | CLASP1   | ENST00000263710 | p.1483in_frame_insGK | c.4448_4447 | 0.077374393 | 3.692 | 1 |
| 3349 | SERPINB1 | ENST00000380739 | p.A40G               | c.119       | 0.007840558 | 0     | 1 |
| 3349 | SERPINB1 | ENST00000380739 | p.F104L              | c.312       | 0.005570413 | 7.488 | 1 |
| 3349 | SERPINB1 | ENST00000380739 | p.S107L              | c.320       | 0.002270145 | 8.783 | 1 |
| 3350 | PBRM1    | ENST00000296302 | p.I709T              | c.2126      | 0.04972103  | 0     | 1 |
| 3350 | PBRM1    | ENST00000296302 | p.M731K              | c.2192      | 0.04972103  | 4.33  | 1 |
| 3351 | GBE1     | ENST00000429644 | p.R565W              | c.1693      | 0.003554839 | 8.136 | 1 |
| 3351 | GBE1     | ENST00000429644 | p.R226I              | c.677       | 0.003554839 | 0     | 1 |
| 3352 | TJP3     | ENST00000262968 | p.P688L              | c.2063      | 0.053289681 | 0     | 1 |
| 3352 | TJP3     | ENST00000262968 | p.R718C              | c.2152      | 0.053289681 | 4.23  | 1 |
| 3353 | AHCY     | ENST00000217426 | p.Q365R              | c.1094      | 0.070854338 | 0     | 1 |
| 3353 | AHCY     | ENST00000217426 | p.E155K              | c.463       | 0.070854338 | 3.819 | 1 |
| 3354 | UBE2K    | ENST00000261427 | p.P82S               | c.244       | 0.14629983  | 2.773 | 1 |
| 3354 | UBE2K    | ENST00000261427 | p.Q126H              | c.378       | 0.14629983  | 0     | 1 |
| 3355 | CP       | ENST00000264613 | p.L808I              | c.2422      | 0.009322935 | 0     | 1 |
| 3355 | CP       | ENST00000264613 | p.F920L              | c.2758      | 0.009322935 | 6.745 | 1 |
| 3356 | DDX25    | ENST00000263576 | p.F344C              | c.1031      | 0.045060277 | 0     | 1 |
| 3356 | DDX25    | ENST00000263576 | p.I402L              | c.1204      | 0.045060277 | 4.472 | 1 |
| 3357 | MGAM     | ENST00000475668 | p.T389I              | c.1166      | 0.08443588  | 0     | 1 |
| 3357 | MGAM     | ENST00000475668 | p.F430C              | c.1289      | 0.08443588  | 3.566 | 1 |
| 3358 | UXS1     | ENST00000283148 | p.P177S              | c.529       | 0.028938879 | 0     | 1 |
| 3358 | UXS1     | ENST00000283148 | p.Y236C              | c.707       | 0.014680043 | 6.09  | 1 |
| 3358 | UXS1     | ENST00000283148 | p.T245I              | c.734       | 0.021112067 | 6.132 | 1 |
| 3359 | CDK7     | ENST00000256443 | p.A39V               | c.116       | 0.048260946 | 0     | 1 |
| 3359 | CDK7     | ENST00000256443 | p.D92N               | c.274       | 0.048260946 | 4.373 | 1 |

|              |                 |          |           |             |       |   |
|--------------|-----------------|----------|-----------|-------------|-------|---|
| 3360 RTN4IP1 | ENST00000369063 | p.R363L  | c.1088    | 0.135925623 | 2.937 | 1 |
| 3360 RTN4IP1 | ENST00000369063 | p.Q223E  | c.667     | 0.140184462 | 0     | 1 |
| 3360 RTN4IP1 | ENST00000369063 | p.A249V  | c.746     | 0.010859206 | 6.702 | 1 |
| 3361 SH3GL2  | ENST00000380607 | p.P303H  | c.908     | 0.004546588 | 7.781 | 1 |
| 3361 SH3GL2  | ENST00000380607 | p.E308K  | c.921_922 | 0.0046647   | 7.744 | 1 |
| 3361 SH3GL2  | ENST00000380607 | p.G310R  | c.928     | 0.108217071 | 3.208 | 1 |
| 3361 SH3GL2  | ENST00000380607 | p.L332M  | c.994     | 0.117428359 | 0     | 1 |
| 3362 PTPRG   | ENST00000474889 | p.F935V  | c.2803    | 0.046134825 | 4.438 | 1 |
| 3362 PTPRG   | ENST00000474889 | p.H1059N | c.3175    | 0.046134825 | 0     | 1 |
| 3363 BCAR3   | ENST00000370243 | p.S688I  | c.2063    | 0.006743122 | 0     | 1 |
| 3363 BCAR3   | ENST00000370243 | p.D728N  | c.2182    | 0.002993398 | 8.384 | 1 |
| 3363 BCAR3   | ENST00000370243 | p.H743R  | c.2228    | 0.003749724 | 8.059 | 1 |
| 3364 POLD2   | ENST00000452185 | p.L218R  | c.653     | 0.001666457 | 9.229 | 1 |
| 3364 POLD2   | ENST00000452185 | p.S239F  | c.716     | 0.02600621  | 5.265 | 1 |
| 3364 POLD2   | ENST00000452185 | p.R26L   | c.77      | 0.027672668 | 0     | 1 |
| 3365 ELAVL1  | ENST00000351593 | p.T59A   | c.175     | 0.056838016 | 0     | 1 |
| 3365 ELAVL1  | ENST00000351593 | p.R80W   | c.238     | 0.056838016 | 4.137 | 1 |
| 3366 F13A1   | ENST00000264870 | p.I635N  | c.1904    | 0.015777364 | 5.986 | 1 |
| 3366 F13A1   | ENST00000264870 | p.D669V  | c.2006    | 0.015777364 | 0     | 1 |
| 3367 MAGI2   | ENST00000354212 | p.E468K  | c.1402    | 0.556711344 | 2.847 | 1 |
| 3367 MAGI2   | ENST00000354212 | p.R508C  | c.1522    | 1.17772576  | 0     | 1 |
| 3367 MAGI2   | ENST00000354212 | p.R508H  | c.1523    | 1.17772576  | 0     | 1 |
| 3367 MAGI2   | ENST00000354212 | p.Y547N  | c.1639    | 0.356223286 | 4.69  | 1 |
| 3368 FBN1    | ENST00000316623 | p.Q1253L | c.3758    | 0.021657342 | 5.529 | 1 |
| 3368 FBN1    | ENST00000316623 | p.D1285N | c.3853    | 0.021657342 | 0     | 1 |
| 3369 BDH2    | ENST00000296424 | p.L4F    | c.10      | 0.102501596 | 0     | 1 |
| 3369 BDH2    | ENST00000296424 | p.L224V  | c.670     | 0.013301365 | 6.346 | 1 |
| 3369 BDH2    | ENST00000296424 | p.R28S   | c.84      | 0.008195229 | 6.931 | 1 |
| 3369 BDH2    | ENST00000296424 | p.G30V   | c.89      | 0.083021405 | 3.608 | 1 |
| 3370 PLA2G4A | ENST00000367466 | p.P586S  | c.1756    | 1.056838016 | 0     | 1 |
| 3370 PLA2G4A | ENST00000367466 | p.P586L  | c.1757    | 1.056838016 | 0     | 1 |
| 3370 PLA2G4A | ENST00000367466 | p.F612I  | c.1834    | 0.113676031 | 4.137 | 1 |
| 3371 PADI4   | ENST00000375448 | p.I381M  | c.1143    | 0.024853534 | 0     | 1 |
| 3371 PADI4   | ENST00000375448 | p.S161Y  | c.482     | 0.010244547 | 6.609 | 1 |
| 3371 PADI4   | ENST00000375448 | p.A163S  | c.487     | 0.014608987 | 6.097 | 1 |
| 3372 TTN     | ENST00000589042 | p.D60N   | c.178     | 0.189268868 | 0     | 1 |
| 3372 TTN     | ENST00000589042 | p.A63T   | c.187     | 0.037350218 | 9.919 | 1 |
| 3372 TTN     | ENST00000589042 | p.T7M    | c.20      | 0.0699286   | 8.972 | 1 |
| 3372 TTN     | ENST00000589042 | p.E169D  | c.507     | 0.160659736 | 2.681 | 1 |
| 3372 TTN     | ENST00000589042 | p.H28Y   | c.82      | 0.134814523 | 5.044 | 1 |
| 3373 KIF2C   | ENST00000372224 | p.A346V  | c.1037    | 0.021285282 | 0     | 1 |
| 3373 KIF2C   | ENST00000372224 | p.A563V  | c.1688    | 0.021285282 | 5.554 | 1 |
| 3374 AIP     | ENST00000279146 | p.A86P   | c.256     | 0.225000482 | 0     | 1 |
| 3374 AIP     | ENST00000279146 | p.I18V   | c.52      | 0.225000482 | 2.152 | 1 |
| 3375 PADI4   | ENST00000375448 | p.Q358L  | c.1073    | 0.167821563 | 3.575 | 1 |
| 3375 PADI4   | ENST00000375448 | p.A294V  | c.881     | 1.083910781 | 0     | 2 |
| 3376 PITRM1  | ENST00000380989 | p.A559V  | c.1676    | 0.018312848 | 5.771 | 1 |
| 3376 PITRM1  | ENST00000380989 | p.E955K  | c.2863    | 0.03914564  | 0     | 1 |
| 3376 PITRM1  | ENST00000380989 | p.L127F  | c.381     | 0.020832792 | 5.585 | 1 |

|               |                 |          |        |             |       |   |
|---------------|-----------------|----------|--------|-------------|-------|---|
| 3377 SMG7     | ENST00000507469 | p.H401Y  | c.1201 | 0.007011797 | 7.156 | 1 |
| 3377 SMG7     | ENST00000507469 | p.H403P  | c.1208 | 0.098618355 | 3.342 | 1 |
| 3377 SMG7     | ENST00000507469 | p.G481W  | c.1441 | 0.105630152 | 0     | 1 |
| 3378 BACE2    | ENST00000330333 | p.K104Q  | c.310  | 0.077379015 | 0     | 1 |
| 3378 BACE2    | ENST00000330333 | p.T128S  | c.382  | 0.070170089 | 3.833 | 1 |
| 3378 BACE2    | ENST00000330333 | p.R134S  | c.402  | 0.007208926 | 7.116 | 1 |
| 3379 FCGR3A   | ENST00000367969 | p.R72K   | c.215  | 0.007432174 | 7.072 | 1 |
| 3379 FCGR3A   | ENST00000367969 | p.D202N  | c.604  | 0.006853231 | 7.189 | 1 |
| 3379 FCGR3A   | ENST00000367969 | p.N223S  | c.668  | 0.014285405 | 0     | 1 |
| 3380 SEC23A   | ENST00000307712 | p.A40S   | c.118  | 0.145188591 | 2.784 | 1 |
| 3380 SEC23A   | ENST00000307712 | p.R18Q   | c.53   | 0.145188591 | 0     | 1 |
| 3381 OXSR1    | ENST00000311806 | p.I45M   | c.135  | 0.005953691 | 0     | 1 |
| 3381 OXSR1    | ENST00000311806 | p.Q20P   | c.59   | 0.005953691 | 7.392 | 1 |
| 3382 CUL1     | ENST00000602748 | p.E439K  | c.1315 | 0.034386832 | 4.862 | 1 |
| 3382 CUL1     | ENST00000602748 | p.D483N  | c.1447 | 0.034386832 | 0     | 1 |
| 3383 RPL4     | ENST00000307961 | p.Y122F  | c.365  | 0.002100575 | 8.895 | 1 |
| 3383 RPL4     | ENST00000307961 | p.M284T  | c.851  | 0.002100575 | 0     | 1 |
| 3384 LIMS1    | ENST00000542845 | p.E206D  | c.618  | 0.088941466 | 3.491 | 1 |
| 3384 LIMS1    | ENST00000542845 | p.A232V  | c.695  | 0.088941466 | 0     | 1 |
| 3385 PYCR1    | ENST00000402252 | p.V126I  | c.376  | 1.013387218 | 7.223 | 1 |
| 3385 PYCR1    | ENST00000402252 | p.V126A  | c.377  | 1.013387218 | 7.223 | 1 |
| 3385 PYCR1    | ENST00000402252 | p.T198M  | c.593  | 0.017591228 | 6.829 | 1 |
| 3385 PYCR1    | ENST00000402252 | p.R293W  | c.877  | 1.022182832 | 0     | 2 |
| 3386 ITGAX    | ENST00000562522 | p.I336F  | c.1006 | 0.007299432 | 0     | 1 |
| 3386 ITGAX    | ENST00000562522 | p.R283H  | c.848  | 0.007299432 | 7.098 | 1 |
| 3387 CD1A     | ENST00000289429 | p.S34C   | c.101  | 0.003450449 | 0     | 1 |
| 3387 CD1A     | ENST00000289429 | p.R99C   | c.295  | 0.003450449 | 8.179 | 1 |
| 3388 TXNIP    | ENST00000369317 | p.D155N  | c.463  | 0.014023595 | 6.156 | 1 |
| 3388 TXNIP    | ENST00000369317 | p.R186K  | c.557  | 0.014023595 | 0     | 1 |
| 3389 SNRNP200 | ENST00000323853 | p.P1296L | c.3887 | 0.061383725 | 4.026 | 1 |
| 3389 SNRNP200 | ENST00000323853 | p.K1498R | c.4493 | 0.061383725 | 0     | 1 |
| 3390 WDR77    | ENST00000235090 | p.R164Q  | c.491  | 0.003728988 | 0     | 1 |
| 3390 WDR77    | ENST00000235090 | p.R191S  | c.573  | 0.003728988 | 8.067 | 1 |
| 3391 TLR4     | ENST00000355622 | p.P346S  | c.1036 | 1.016277241 | 6.941 | 1 |
| 3391 TLR4     | ENST00000355622 | p.P346L  | c.1037 | 1.016277241 | 6.941 | 1 |
| 3391 TLR4     | ENST00000355622 | p.D325Y  | c.973  | 1.016277241 | 0     | 2 |
| 3392 MICB     | ENST00000252229 | p.Q37R   | c.110  | 0.020890633 | 5.581 | 1 |
| 3392 MICB     | ENST00000252229 | p.G108R  | c.322  | 0.020890633 | 0     | 1 |
| 3393 F13A1    | ENST00000264870 | p.R547H  | c.1640 | 0.307321515 | 0     | 1 |
| 3393 F13A1    | ENST00000264870 | p.T573M  | c.1718 | 0.122503459 | 3.299 | 1 |
| 3393 F13A1    | ENST00000264870 | p.D575N  | c.1723 | 0.100882114 | 3.602 | 1 |
| 3393 F13A1    | ENST00000264870 | p.V576M  | c.1726 | 0.146058338 | 3.019 | 1 |
| 3394 MMP13    | ENST00000260302 | p.D429N  | c.1285 | 0.038370314 | 5.414 | 1 |
| 3394 MMP13    | ENST00000260302 | p.Y440C  | c.1319 | 0.01955932  | 5.676 | 1 |
| 3394 MMP13    | ENST00000260302 | p.R461C  | c.1381 | 0.043013681 | 0     | 1 |
| 3395 GPC1     | ENST00000420138 | p.A159V  | c.476  | 0.006425391 | 0     | 1 |
| 3395 GPC1     | ENST00000420138 | p.A188V  | c.563  | 0.006425391 | 7.282 | 1 |
| 3396 TRIM24   | ENST00000343526 | p.C844Y  | c.2531 | 0.010496121 | 6.574 | 1 |
| 3396 TRIM24   | ENST00000343526 | p.I866L  | c.2596 | 0.010496121 | 0     | 1 |

|               |                 |          |             |             |       |   |
|---------------|-----------------|----------|-------------|-------------|-------|---|
| 3397 IFNAR2   | ENST00000342136 | p.K42N   | c.126       | 0.095031582 | 9.735 | 1 |
| 3397 IFNAR2   | ENST00000342136 | p.F48Y   | c.143       | 0.355910471 | 0     | 1 |
| 3397 IFNAR2   | ENST00000342136 | p.S133C  | c.398       | 0.129168365 | 6.293 | 1 |
| 3397 IFNAR2   | ENST00000342136 | p.P155L  | c.464       | 0.346345205 | 1.548 | 1 |
| 3398 ELAVL4   | ENST00000371821 | p.G143S  | c.427       | 0.190610436 | 0     | 1 |
| 3398 ELAVL4   | ENST00000371821 | p.G179E  | c.536       | 0.142418588 | 2.89  | 1 |
| 3398 ELAVL4   | ENST00000371821 | p.E208K  | c.622       | 0.063221964 | 4.166 | 1 |
| 3399 C11orf54 | ENST00000528099 | p.G106W  | c.316       | 0.012060197 | 0     | 1 |
| 3399 C11orf54 | ENST00000528099 | p.Y145D  | c.433       | 0.003634569 | 8.104 | 1 |
| 3399 C11orf54 | ENST00000528099 | p.C149G  | c.445       | 0.008425628 | 6.891 | 1 |
| 3400 LYZ      | ENST00000261267 | p.N57I   | c.170       | 0.205185402 | 2.285 | 1 |
| 3400 LYZ      | ENST00000261267 | p.K19N   | c.57        | 0.205185402 | 0     | 1 |
| 3401 C5       | ENST00000223642 | p.Q1112R | c.3335      | 0.019505165 | 0     | 1 |
| 3401 C5       | ENST00000223642 | p.I1169A | c.3506_3505 | 0.019505165 | 5.68  | 1 |
| 3402 MYOM1    | ENST00000356443 | p.S1155L | c.3464      | 0.006040987 | 7.371 | 1 |
| 3402 MYOM1    | ENST00000356443 | p.E1168Q | c.3502      | 0.006633564 | 7.236 | 1 |
| 3402 MYOM1    | ENST00000356443 | p.F1169L | c.3507      | 0.100064351 | 3.321 | 1 |
| 3402 MYOM1    | ENST00000356443 | p.T1193M | c.3578      | 0.112738903 | 0     | 1 |
| 3403 GIMAP1   | ENST00000307194 | p.E99K   | c.295       | 0.006679705 | 7.226 | 1 |
| 3403 GIMAP1   | ENST00000307194 | p.R241Q  | c.722       | 0.006679705 | 0     | 1 |
| 3404 EPHB2    | ENST00000400191 | p.V61L   | c.181       | 0.007758535 | 7.01  | 1 |
| 3404 EPHB2    | ENST00000400191 | p.S93L   | c.278       | 0.015773989 | 0     | 1 |
| 3404 EPHB2    | ENST00000400191 | p.V156I  | c.466       | 0.008015454 | 6.963 | 1 |
| 3405 EP300    | ENST00000263253 | p.R1076C | c.3226      | 0.018607138 | 5.748 | 1 |
| 3405 EP300    | ENST00000263253 | p.T1101I | c.3302      | 0.018607138 | 0     | 1 |
| 3406 DCC      | ENST00000442544 | p.T882I  | c.2645      | 0.078508899 | 3.671 | 1 |
| 3406 DCC      | ENST00000442544 | p.T923K  | c.2768      | 0.078508899 | 0     | 1 |
| 3407 CYP1A1   | ENST00000567032 | p.H388R  | c.1163      | 0.091441951 | 3.451 | 1 |
| 3407 CYP1A1   | ENST00000567032 | p.R106Q  | c.317       | 0.091441951 | 0     | 1 |
| 3408 FOLH1    | ENST00000256999 | p.G364R  | c.1090      | 0.017457612 | 0     | 1 |
| 3408 FOLH1    | ENST00000256999 | p.D106N  | c.316       | 0.017457612 | 5.84  | 1 |
| 3409 PAPOLG   | ENST00000238714 | p.R406W  | c.1216      | 0.010301513 | 0     | 1 |
| 3409 PAPOLG   | ENST00000238714 | p.S26C   | c.76        | 0.010301513 | 6.601 | 1 |
| 3410 PTPRE    | ENST00000419012 | p.H334Y  | c.1000      | 0.04670446  | 0     | 1 |
| 3410 PTPRE    | ENST00000419012 | p.M377I  | c.1131      | 0.001831194 | 9.093 | 1 |
| 3410 PTPRE    | ENST00000419012 | p.P210L  | c.629       | 0.044873266 | 4.478 | 1 |
| 3411 MACROD2  | ENST00000310348 | p.I87V   | c.259       | 0.034101996 | 5.874 | 1 |
| 3411 MACROD2  | ENST00000310348 | p.N89S   | c.266       | 0.076045147 | 4.717 | 1 |
| 3411 MACROD2  | ENST00000310348 | p.P183S  | c.547       | 1.078237119 | 0     | 1 |
| 3411 MACROD2  | ENST00000310348 | p.P183L  | c.548       | 1.078237119 | 0     | 1 |
| 3411 MACROD2  | ENST00000310348 | p.Y232S  | c.695       | 0.080433745 | 5.432 | 1 |
| 3412 RPL17    | ENST00000579408 | p.R42Q   | c.125       | 0.015810206 | 5.983 | 1 |
| 3412 RPL17    | ENST00000579408 | p.D110H  | c.328       | 0.015810206 | 0     | 1 |
| 3413 SERPINA5 | ENST00000554866 | p.H108D  | c.322       | 0.17206135  | 2.555 | 1 |
| 3413 SERPINA5 | ENST00000554866 | p.N119I  | c.356       | 0.013045636 | 6.487 | 1 |
| 3413 SERPINA5 | ENST00000554866 | p.Y153H  | c.457       | 0.181312815 | 0     | 1 |
| 3414 TLE1     | ENST00000376499 | p.S625C  | c.1874      | 0.008292369 | 0     | 1 |
| 3414 TLE1     | ENST00000376499 | p.V686E  | c.2057      | 0.008292369 | 6.914 | 1 |
| 3415 REG3A    | ENST00000305165 | p.S78F   | c.233       | 0.737062395 | 2.079 | 1 |

|              |                 |                    |             |             |       |   |
|--------------|-----------------|--------------------|-------------|-------------|-------|---|
| 3415 REG3A   | ENST00000305165 | p.S124I            | c.371       | 0.388532413 | 4.002 | 1 |
| 3415 REG3A   | ENST00000305165 | p.S125C            | c.373       | 1.299091824 | 0     | 1 |
| 3415 REG3A   | ENST00000305165 | p.S125I            | c.374       | 1.299091824 | 0     | 1 |
| 3416 OGT     | ENST00000373719 | p.R117C            | c.349       | 1.03465002  | 0     | 1 |
| 3416 OGT     | ENST00000373719 | p.R117H            | c.350       | 1.03465002  | 0     | 1 |
| 3416 OGT     | ENST00000373719 | p.Y146C            | c.437       | 0.06930004  | 4.851 | 1 |
| 3417 PIK3R1  | ENST00000274335 | p.G376R            | c.1126      | 7.072293011 | 0     | 8 |
| 3417 PIK3R1  | ENST00000274335 | p.452in_frame_insY | c.1353_1354 | 0.578344092 | 3.79  | 1 |
| 3418 UBE2D2  | ENST00000398733 | p.H55R             | c.164       | 0.143895637 | 0     | 1 |
| 3418 UBE2D2  | ENST00000398733 | p.D29N             | c.85        | 0.040500207 | 4.773 | 1 |
| 3418 UBE2D2  | ENST00000398733 | p.F31L             | c.93        | 0.111245929 | 3.22  | 1 |
| 3419 TLR8    | ENST00000311912 | p.I188V            | c.562       | 0.166790283 | 2.602 | 1 |
| 3419 TLR8    | ENST00000311912 | p.N220H            | c.658       | 0.177340008 | 0     | 1 |
| 3419 TLR8    | ENST00000311912 | p.L242I            | c.724       | 0.014710303 | 6.307 | 1 |
| 3420 FOLH1   | ENST00000256999 | p.E425V            | c.1274      | 0.056586691 | 4.965 | 1 |
| 3420 FOLH1   | ENST00000256999 | p.A163S            | c.487       | 0.131667035 | 3.223 | 1 |
| 3420 FOLH1   | ENST00000256999 | p.G256R            | c.766       | 0.139115145 | 0     | 1 |
| 3421 NKTR    | ENST00000232978 | p.A106V            | c.317       | 0.014864348 | 0     | 1 |
| 3421 NKTR    | ENST00000232978 | p.V143F            | c.427       | 0.014864348 | 6.072 | 1 |
| 3422 SULT4A1 | ENST00000249130 | p.L60M             | c.178       | 0.014843756 | 6.074 | 1 |
| 3422 SULT4A1 | ENST00000249130 | p.D137N            | c.409_408   | 0.009875024 | 6.662 | 1 |
| 3422 SULT4A1 | ENST00000249130 | p.Q144L            | c.431       | 0.009093176 | 6.781 | 1 |
| 3423 BTN3A3  | ENST00000244519 | p.H53P             | c.158       | 0.073457069 | 3.889 | 1 |
| 3423 BTN3A3  | ENST00000244519 | p.F133L            | c.399       | 0.021626076 | 5.716 | 1 |
| 3423 BTN3A3  | ENST00000244519 | p.E135K            | c.403       | 0.075243915 | 3.852 | 1 |
| 3423 BTN3A3  | ENST00000244519 | p.S32C             | c.95        | 0.155775026 | 0     | 1 |
| 3424 SYT13   | ENST00000020926 | p.H252Q            | c.756       | 0.095589767 | 0     | 1 |
| 3424 SYT13   | ENST00000020926 | p.P284S            | c.850       | 0.095589767 | 3.387 | 1 |
| 3425 LTF     | ENST00000231751 | p.S540N            | c.1619      | 0.047530586 | 4.395 | 1 |
| 3425 LTF     | ENST00000231751 | p.A550V            | c.1649      | 0.010089511 | 6.631 | 1 |
| 3425 LTF     | ENST00000231751 | p.L660F            | c.1978      | 0.057620097 | 0     | 1 |
| 3426 BIRC2   | ENST00000227758 | p.E357Q            | c.1069      | 0.183273795 | 0     | 1 |
| 3426 BIRC2   | ENST00000227758 | p.P331Q            | c.992       | 0.029390615 | 5.3   | 1 |
| 3426 BIRC2   | ENST00000227758 | p.R332G            | c.994       | 0.161898635 | 2.663 | 1 |
| 3427 CTSB    | ENST00000353047 | p.C105R            | c.313       | 0.014874655 | 6.071 | 1 |
| 3427 CTSB    | ENST00000353047 | p.C198W            | c.594       | 0.014874655 | 0     | 1 |
| 3428 EIF2AK2 | ENST00000395127 | p.W377C            | c.1131      | 0.006805892 | 7.199 | 1 |
| 3428 EIF2AK2 | ENST00000395127 | p.V428I            | c.1282      | 0.006805892 | 0     | 1 |
| 3429 BCKDHA  | ENST00000595085 | p.T245M            | c.734       | 0.01025165  | 0     | 1 |
| 3429 BCKDHA  | ENST00000595085 | p.A280T            | c.838       | 0.01025165  | 6.608 | 1 |
| 3430 STRADA  | ENST00000336174 | p.K77R             | c.230       | 0.004239177 | 0     | 1 |
| 3430 STRADA  | ENST00000336174 | p.D157H            | c.469       | 0.004239177 | 7.882 | 1 |
| 3431 RTN4IP1 | ENST00000369063 | p.Q61H             | c.183       | 0.009840859 | 6.667 | 1 |
| 3431 RTN4IP1 | ENST00000369063 | p.G125S            | c.373       | 0.004233305 | 7.884 | 1 |
| 3431 RTN4IP1 | ENST00000369063 | p.E157D            | c.471       | 0.014074164 | 0     | 1 |
| 3432 IL3RA   | ENST00000331035 | p.D55G             | c.164       | 0.001256825 | 9.636 | 1 |
| 3432 IL3RA   | ENST00000331035 | p.M32I             | c.96        | 0.001256825 | 0     | 1 |
| 3433 MYO10   | ENST00000513610 | p.P1548L           | c.4643      | 0.010180837 | 6.618 | 1 |
| 3433 MYO10   | ENST00000513610 | p.R1600Q           | c.4799      | 0.018718163 | 0     | 1 |

|      |         |                 |                        |           |             |       |   |
|------|---------|-----------------|------------------------|-----------|-------------|-------|---|
| 3433 | MYO10   | ENST00000513610 | p.L1640M               | c.4918    | 0.008537326 | 6.872 | 1 |
| 3434 | GLTPD1  | ENST00000343938 | p.R196S                | c.586     | 0.034746224 | 0     | 1 |
| 3434 | GLTPD1  | ENST00000343938 | p.D22N                 | c.64      | 0.034746224 | 4.847 | 1 |
| 3435 | CDKN2A  | ENST00000361570 | p.L127V                | c.379     | 0.045310839 | 0     | 1 |
| 3435 | CDKN2A  | ENST00000361570 | p.GAAGR157in_frame_del | c.479_465 | 0.045310839 | 4.464 | 1 |
| 3436 | AZU1    | ENST00000233997 | p.F40L                 | c.120     | 0.070024326 | 0     | 1 |
| 3436 | AZU1    | ENST00000233997 | p.V206I                | c.616     | 0.070024326 | 3.836 | 1 |
| 3437 | RUVBL2  | ENST00000595090 | p.G89S                 | c.265     | 0.075154328 | 3.734 | 1 |
| 3437 | RUVBL2  | ENST00000595090 | p.L94M                 | c.280     | 0.007213924 | 7.115 | 1 |
| 3437 | RUVBL2  | ENST00000595090 | p.G30E                 | c.89      | 0.082368252 | 0     | 1 |
| 3438 | PYGL    | ENST00000216392 | p.N827D                | c.2479    | 0.025260027 | 0     | 1 |
| 3438 | PYGL    | ENST00000216392 | p.D332E                | c.996     | 0.025260027 | 5.307 | 1 |
| 3439 | CA2     | ENST00000285379 | p.G8C                  | c.22      | 0.025137762 | 5.314 | 1 |
| 3439 | CA2     | ENST00000285379 | p.E186K                | c.556     | 0.025137762 | 0     | 1 |
| 3440 | XIAP    | ENST00000371199 | p.I149M                | c.447     | 0.012568881 | 6.314 | 1 |
| 3440 | XIAP    | ENST00000371199 | p.R233Q                | c.698     | 0.012568881 | 0     | 1 |
| 3441 | C6      | ENST00000263413 | p.P480S                | c.1438    | 0.063471068 | 0     | 1 |
| 3441 | C6      | ENST00000263413 | p.P188L                | c.563     | 0.061658955 | 4.184 | 1 |
| 3441 | C6      | ENST00000263413 | p.M320T                | c.959     | 0.052741049 | 6.886 | 1 |
| 3442 | ALDH4A1 | ENST00000290597 | p.V489I                | c.1465    | 0.024231038 | 5.367 | 1 |
| 3442 | ALDH4A1 | ENST00000290597 | p.V490A                | c.1469    | 0.008680537 | 6.848 | 1 |
| 3442 | ALDH4A1 | ENST00000290597 | p.S326L                | c.977     | 0.032911575 | 0     | 1 |
| 3443 | TJP1    | ENST00000356107 | p.R96W                 | c.286     | 0.133239844 | 2.963 | 1 |
| 3443 | TJP1    | ENST00000356107 | p.K97N                 | c.291     | 0.04392187  | 4.683 | 1 |
| 3443 | TJP1    | ENST00000356107 | p.R28M                 | c.83      | 0.167176562 | 0     | 1 |
| 3444 | NOTCH1  | ENST00000277541 | p.N1484I               | c.4451    | 0.037972854 | 4.841 | 1 |
| 3444 | NOTCH1  | ENST00000277541 | p.W1487C               | c.4461    | 0.091408926 | 3.501 | 1 |
| 3444 | NOTCH1  | ENST00000277541 | p.A1705V               | c.5114    | 0.123218133 | 0     | 1 |
| 3445 | ALK     | ENST00000389048 | p.R1253T               | c.3758    | 0.017301009 | 5.853 | 1 |
| 3445 | ALK     | ENST00000389048 | p.L1318M               | c.3952    | 0.017301009 | 0     | 1 |
| 3446 | MTPAP   | ENST00000358107 | p.G579V                | c.1736    | 0.190514099 | 3.472 | 1 |
| 3446 | MTPAP   | ENST00000358107 | p.R633Q                | c.1898    | 1.090120554 | 0     | 2 |
| 3447 | ENOSF1  | ENST00000340116 | p.P361L                | c.1082    | 0.09307736  | 3.516 | 1 |
| 3447 | ENOSF1  | ENST00000340116 | p.V391A                | c.1172    | 0.157644224 | 0     | 1 |
| 3447 | ENOSF1  | ENST00000340116 | p.W295G                | c.883     | 0.154368455 | 3.948 | 1 |
| 3448 | NEIL1   | ENST00000355059 | p.R90L                 | c.269     | 0.070756181 | 4.821 | 1 |
| 3448 | NEIL1   | ENST00000355059 | p.E28K                 | c.82      | 1.035378091 | 0     | 1 |
| 3448 | NEIL1   | ENST00000355059 | p.E28D                 | c.84      | 1.035378091 | 0     | 1 |
| 3449 | TLR5    | ENST00000366881 | p.N248D                | c.742     | 1.022925209 | 0     | 2 |
| 3449 | TLR5    | ENST00000366881 | p.P277H                | c.830     | 0.00579892  | 8.43  | 1 |
| 3449 | TLR5    | ENST00000366881 | p.A283V                | c.848     | 0.05057676  | 5.642 | 1 |
| 3450 | ELAVL4  | ENST00000371821 | p.L139F                | c.415     | 0.144044603 | 3.831 | 1 |
| 3450 | ELAVL4  | ENST00000371821 | p.E192K                | c.574     | 0.121663754 | 3.137 | 1 |
| 3450 | ELAVL4  | ENST00000371821 | p.F214V                | c.640     | 0.18856632  | 0     | 1 |
| 3450 | ELAVL4  | ENST00000371821 | p.A215S                | c.643     | 0.070412303 | 7.757 | 1 |
| 3451 | CYCS    | ENST00000409409 | p.L36F                 | c.106     | 0.03413448  | 5.103 | 1 |
| 3451 | CYCS    | ENST00000409409 | p.R92M                 | c.275     | 0.030068018 | 7.816 | 1 |
| 3451 | CYCS    | ENST00000409409 | p.D94A                 | c.281     | 0.206673011 | 0     | 1 |
| 3451 | CYCS    | ENST00000409409 | p.I10S                 | c.29      | 0.203806854 | 2.53  | 1 |

|      |           |                 |          |           |             |       |   |
|------|-----------|-----------------|----------|-----------|-------------|-------|---|
| 3452 | AGO1      | ENST00000373204 | p.P338S  | c.1012    | 0.010828671 | 0     | 1 |
| 3452 | AGO1      | ENST00000373204 | p.L316F  | c.945_946 | 0.010828671 | 6.529 | 1 |
| 3453 | SPON2     | ENST00000290902 | p.S71L   | c.212     | 0.106505512 | 0     | 1 |
| 3453 | SPON2     | ENST00000290902 | p.F97I   | c.289     | 0.106505512 | 3.231 | 1 |
| 3454 | NEIL1     | ENST00000355059 | p.A153V  | c.458     | 0.086613298 | 3.573 | 1 |
| 3454 | NEIL1     | ENST00000355059 | p.R159Q  | c.476     | 0.033363187 | 5.022 | 1 |
| 3454 | NEIL1     | ENST00000355059 | p.R195C  | c.583     | 0.114804263 | 0     | 1 |
| 3455 | MRE11A    | ENST00000407439 | p.Q221K  | c.661     | 0.00465501  | 7.747 | 1 |
| 3455 | MRE11A    | ENST00000407439 | p.D23Y   | c.67      | 0.00465501  | 0     | 1 |
| 3456 | DFNB31    | ENST00000362057 | p.A376T  | c.1126    | 0.112812591 | 0     | 1 |
| 3456 | DFNB31    | ENST00000362057 | p.G410S  | c.1228    | 0.112812591 | 3.148 | 1 |
| 3457 | EHMT1     | ENST00000460843 | p.E1170D | c.3510    | 0.028716028 | 0     | 1 |
| 3457 | EHMT1     | ENST00000460843 | p.E1233K | c.3697    | 0.028716028 | 5.122 | 1 |
| 3458 | PTPRM     | ENST00000400060 | p.H951N  | c.2851    | 0.011469927 | 6.446 | 1 |
| 3458 | PTPRM     | ENST00000400060 | p.R1145W | c.3433    | 0.011469927 | 0     | 1 |
| 3459 | CD38      | ENST00000226279 | p.V117I  | c.349     | 1.01165425  | 0     | 2 |
| 3459 | CD38      | ENST00000226279 | p.S264L  | c.791     | 0.113195805 | 6.423 | 1 |
| 3460 | DDC       | ENST00000444124 | p.H434L  | c.1301    | 0.010561803 | 0     | 1 |
| 3460 | DDC       | ENST00000444124 | p.Y79F   | c.236     | 0.010561803 | 6.565 | 1 |
| 3461 | CYP2R1    | ENST00000334636 | p.L449I  | c.1345    | 0.006721505 | 0     | 1 |
| 3461 | CYP2R1    | ENST00000334636 | p.R145P  | c.434     | 0.006721505 | 7.217 | 1 |
| 3462 | PRKCB     | ENST00000303531 | p.G478E  | c.1433    | 0.139467415 | 3.842 | 1 |
| 3462 | PRKCB     | ENST00000303531 | p.R610H  | c.1829    | 1.069733708 | 0     | 2 |
| 3463 | SSRP1     | ENST00000278412 | p.R203W  | c.607     | 0.021021363 | 0     | 1 |
| 3463 | SSRP1     | ENST00000278412 | p.L310P  | c.929     | 0.021021363 | 5.572 | 1 |
| 3464 | HIST1H2BA | ENST00000274764 | p.R74C   | c.220     | 0.001277908 | 0     | 1 |
| 3464 | HIST1H2BA | ENST00000274764 | p.R101C  | c.301     | 0.001277908 | 9.612 | 1 |
| 3465 | RET       | ENST00000355710 | p.R205G  | c.613     | 0.040023746 | 4.643 | 1 |
| 3465 | RET       | ENST00000355710 | p.M255I  | c.765     | 0.040023746 | 0     | 1 |
| 3466 | FAM105B   | ENST00000284274 | p.A138T  | c.412     | 0.012770509 | 6.427 | 1 |
| 3466 | FAM105B   | ENST00000284274 | p.R299C  | c.895     | 0.099972166 | 3.339 | 1 |
| 3466 | FAM105B   | ENST00000284274 | p.P328L  | c.983     | 0.110445622 | 0     | 1 |
| 3467 | FDPS      | ENST00000356657 | p.S88F   | c.263     | 0.098847135 | 3.651 | 1 |
| 3467 | FDPS      | ENST00000356657 | p.R150Q  | c.449     | 0.148246235 | 3.014 | 1 |
| 3467 | FDPS      | ENST00000356657 | p.T153N  | c.458     | 0.141916428 | 3.084 | 1 |
| 3467 | FDPS      | ENST00000356657 | p.Y212C  | c.635     | 0.321327483 | 0     | 1 |
| 3468 | ASF1A     | ENST00000229595 | p.I42T   | c.125     | 0.00915008  | 0     | 1 |
| 3468 | ASF1A     | ENST00000229595 | p.V109F  | c.325     | 0.00915008  | 6.772 | 1 |
| 3469 | G6PD      | ENST00000369620 | p.G174E  | c.521     | 0.20858693  | 0     | 1 |
| 3469 | G6PD      | ENST00000369620 | p.Y249C  | c.746     | 0.011304368 | 6.729 | 1 |
| 3469 | G6PD      | ENST00000369620 | p.D251N  | c.751     | 0.201037487 | 2.328 | 1 |
| 3470 | VPS33A    | ENST00000267199 | p.N353D  | c.1057    | 0.009854511 | 6.665 | 1 |
| 3470 | VPS33A    | ENST00000267199 | p.L295F  | c.883     | 0.009854511 | 0     | 1 |
| 3471 | PTPRF     | ENST00000359947 | p.A1603E | c.4808    | 0.00830963  | 6.911 | 1 |
| 3471 | PTPRF     | ENST00000359947 | p.R1878C | c.5632    | 0.00830963  | 0     | 1 |
| 3472 | ALDH18A1  | ENST00000371224 | p.E581K  | c.1741    | 0.042394911 | 0     | 1 |
| 3472 | ALDH18A1  | ENST00000371224 | p.G692D  | c.2075    | 0.029400816 | 5.088 | 1 |
| 3472 | ALDH18A1  | ENST00000371224 | p.S694F  | c.2081    | 0.012994095 | 6.266 | 1 |
| 3473 | ERBB4     | ENST00000342788 | p.R196C  | c.586     | 0.017253107 | 5.857 | 1 |

|              |                 |          |             |             |       |   |
|--------------|-----------------|----------|-------------|-------------|-------|---|
| 3473 ERBB4   | ENST00000342788 | p.G319E  | c.956       | 0.017253107 | 0     | 1 |
| 3474 CACYBP  | ENST00000367681 | p.M84I   | c.252       | 0.040358042 | 0     | 1 |
| 3474 CACYBP  | ENST00000367681 | p.I109T  | c.326       | 0.040358042 | 4.631 | 1 |
| 3475 BLM     | ENST00000355112 | p.F1087C | c.3260      | 0.012327294 | 6.342 | 1 |
| 3475 BLM     | ENST00000355112 | p.Q1127H | c.3381      | 0.012327294 | 0     | 1 |
| 3476 LIG4    | ENST00000356922 | p.D868Y  | c.2602      | 0.009712107 | 6.686 | 1 |
| 3476 LIG4    | ENST00000356922 | p.E891K  | c.2671      | 0.009712107 | 0     | 1 |
| 3477 HCN4    | ENST00000261917 | p.V534M  | c.1600      | 0.082985322 | 3.591 | 1 |
| 3477 HCN4    | ENST00000261917 | p.E572K  | c.1714      | 0.082985322 | 0     | 1 |
| 3478 EXOSC10 | ENST00000376936 | p.R438W  | c.1312      | 0.042130242 | 0     | 1 |
| 3478 EXOSC10 | ENST00000376936 | p.S332Y  | c.995       | 0.042130242 | 4.569 | 1 |
| 3479 CPB1    | ENST00000282957 | p.E150D  | c.450       | 0.064569649 | 0     | 1 |
| 3479 CPB1    | ENST00000282957 | p.R237H  | c.710       | 0.064569649 | 3.953 | 1 |
| 3480 WDR77   | ENST00000235090 | p.P64L   | c.191       | 0.002725998 | 8.519 | 1 |
| 3480 WDR77   | ENST00000235090 | p.L312V  | c.934       | 0.002725998 | 0     | 1 |
| 3481 TFRC    | ENST00000360110 | p.S419F  | c.1257_1256 | 0.145995924 | 0     | 1 |
| 3481 TFRC    | ENST00000360110 | p.R155H  | c.464       | 0.145995924 | 2.776 | 1 |
| 3482 SULT1A1 | ENST00000395609 | p.T51S   | c.151       | 0.030606884 | 0     | 1 |
| 3482 SULT1A1 | ENST00000395609 | p.T107A  | c.319       | 0.030606884 | 5.03  | 1 |
| 3483 F2      | ENST00000311907 | p.Q130K  | c.388       | 0.058271785 | 4.26  | 1 |
| 3483 F2      | ENST00000311907 | p.R133M  | c.398       | 0.122546344 | 3.102 | 1 |
| 3483 F2      | ENST00000311907 | p.E154D  | c.462       | 0.168660549 | 0     | 1 |
| 3484 GAD2    | ENST00000259271 | p.A443T  | c.1327      | 0.059746582 | 4.065 | 1 |
| 3484 GAD2    | ENST00000259271 | p.Y249H  | c.745       | 0.059746582 | 0     | 1 |
| 3485 VAV3    | ENST00000527011 | p.W10R   | c.28        | 0.155286035 | 0     | 1 |
| 3485 VAV3    | ENST00000527011 | p.A121V  | c.362       | 0.155286035 | 2.687 | 1 |
| 3486 USP21   | ENST00000289865 | p.R536C  | c.1606      | 0.007562086 | 7.047 | 1 |
| 3486 USP21   | ENST00000289865 | p.R215Q  | c.644       | 0.019208261 | 0     | 1 |
| 3486 USP21   | ENST00000289865 | p.T281S  | c.841       | 0.011646175 | 6.424 | 1 |
| 3487 F11R    | ENST00000368026 | p.A143V  | c.428       | 0.00538278  | 0     | 1 |
| 3487 F11R    | ENST00000368026 | p.P201S  | c.601       | 0.002587904 | 8.594 | 1 |
| 3487 F11R    | ENST00000368026 | p.R228H  | c.683       | 0.002794876 | 8.483 | 1 |
| 3488 CRMP1   | ENST00000324989 | p.R352W  | c.1054_1053 | 0.140349488 | 2.941 | 1 |
| 3488 CRMP1   | ENST00000324989 | p.D292N  | c.874       | 0.207592322 | 0     | 1 |
| 3488 CRMP1   | ENST00000324989 | p.D317Y  | c.949       | 0.087505952 | 3.692 | 1 |
| 3489 XPO1    | ENST00000404992 | p.E655D  | c.1965      | 0.031220217 | 5.072 | 1 |
| 3489 XPO1    | ENST00000404992 | p.W665R  | c.1993      | 0.051662608 | 4.317 | 1 |
| 3489 XPO1    | ENST00000404992 | p.R712K  | c.2135      | 0.079899783 | 0     | 1 |
| 3490 MAAA    | ENST00000281317 | p.A304V  | c.911       | 1.014629254 | 7.095 | 2 |
| 3490 MAAA    | ENST00000281317 | p.R326C  | c.976       | 1.014629254 | 0     | 2 |
| 3491 ACE     | ENST00000290866 | p.N74T   | c.221       | 0.016447362 | 0     | 1 |
| 3491 ACE     | ENST00000290866 | p.M147T  | c.440       | 0.016447362 | 5.926 | 1 |
| 3492 PGK1    | ENST00000373316 | p.V284L  | c.850       | 0.014229216 | 6.135 | 1 |
| 3492 PGK1    | ENST00000373316 | p.S321N  | c.962       | 0.014229216 | 0     | 1 |
| 3493 GIMAP7  | ENST00000313543 | p.R216W  | c.646       | 0.005601388 | 0     | 1 |
| 3493 GIMAP7  | ENST00000313543 | p.E266K  | c.796       | 0.005601388 | 7.48  | 1 |
| 3494 CD180   | ENST00000256447 | p.N41H   | c.121       | 0.003460029 | 8.175 | 1 |
| 3494 CD180   | ENST00000256447 | p.F64I   | c.190       | 0.003460029 | 0     | 1 |
| 3495 SAMHD1  | ENST00000262878 | p.Y173C  | c.518       | 0.046387831 | 4.461 | 1 |



|             |                 |          |         |             |       |   |
|-------------|-----------------|----------|---------|-------------|-------|---|
| 3495 SAMHD1 | ENST00000262878 | p.V179F  | c.535   | 0.022625009 | 5.53  | 1 |
| 3495 SAMHD1 | ENST00000262878 | p.Q200R  | c.599   | 0.067047493 | 0     | 1 |
| 3496 LRRC4  | ENST00000249363 | p.A358T  | c.1072  | 0.00919055  | 7.497 | 1 |
| 3496 LRRC4  | ENST00000249363 | p.P359L  | c.1076  | 0.010964623 | 6.511 | 1 |
| 3496 LRRC4  | ENST00000249363 | p.G420W  | c.1258  | 0.016500394 | 0     | 1 |
| 3497 IL10   | ENST00000423557 | p.M86I   | c.258   | 0.006275734 | 0     | 1 |
| 3497 IL10   | ENST00000423557 | p.Y167H  | c.499   | 0.006275734 | 7.316 | 1 |
| 3498 PRKCG  | ENST00000540413 | p.M186T  | c.557   | 0.210897501 | 3.295 | 1 |
| 3498 PRKCG  | ENST00000540413 | p.D254N  | c.760   | 1.101884042 | 0     | 2 |
| 3499 HUWE1  | ENST00000342160 | p.R3998H | c.11993 | 0.041728344 | 4.621 | 1 |
| 3499 HUWE1  | ENST00000342160 | p.R4002H | c.12005 | 0.027901168 | 5.221 | 1 |
| 3499 HUWE1  | ENST00000342160 | p.S4287Y | c.12860 | 0.067450334 | 0     | 1 |
| 3500 GAD2   | ENST00000259271 | p.N388I  | c.1163  | 0.088399299 | 3.562 | 1 |
| 3500 GAD2   | ENST00000259271 | p.V409L  | c.1225  | 0.128711585 | 0     | 1 |
| 3500 GAD2   | ENST00000259271 | p.R225K  | c.674   | 0.047770262 | 4.505 | 1 |
| 3501 MBTD1  | ENST00000415868 | p.D420N  | c.1258  | 0.105769825 | 0     | 1 |
| 3501 MBTD1  | ENST00000415868 | p.P456L  | c.1367  | 0.105769825 | 3.241 | 1 |
| 3502 CA6    | ENST00000377436 | p.A41T   | c.121   | 0.021095099 | 5.848 | 1 |
| 3502 CA6    | ENST00000377436 | p.S48L   | c.143   | 0.143514503 | 2.982 | 1 |
| 3502 CA6    | ENST00000377436 | p.R132T  | c.395   | 0.034032376 | 5.158 | 1 |
| 3502 CA6    | ENST00000377436 | p.R264H  | c.791   | 0.260449724 | 0     | 1 |
| 3502 CA6    | ENST00000377436 | p.E32K   | c.94    | 0.10372943  | 3.498 | 1 |
| 3503 GRB2   | ENST00000316804 | p.K117R  | c.350   | 0.031824346 | 5.042 | 1 |
| 3503 GRB2   | ENST00000316804 | p.S127Y  | c.380   | 0.049933062 | 4.367 | 1 |
| 3503 GRB2   | ENST00000316804 | p.E130D  | c.390   | 0.017445515 | 5.841 | 1 |
| 3503 GRB2   | ENST00000316804 | p.R179L  | c.536   | 0.09626095  | 0     | 1 |
| 3504 CST7   | ENST00000376835 | p.I64M   | c.192   | 0.065698307 | 3.928 | 1 |
| 3504 CST7   | ENST00000376835 | p.L101P  | c.302   | 0.065698307 | 0     | 1 |
| 3506 ESRRG  | ENST00000360012 | p.K420R  | c.1259  | 0.088818253 | 3.493 | 1 |
| 3506 ESRRG  | ENST00000360012 | p.I239T  | c.716   | 0.088818253 | 0     | 1 |
| 3507 CHP2   | ENST00000300113 | p.R48C   | c.142   | 0.133440026 | 0     | 1 |
| 3507 CHP2   | ENST00000300113 | p.G74E   | c.221   | 0.037818342 | 4.861 | 1 |
| 3507 CHP2   | ENST00000300113 | p.S75N   | c.224   | 0.102437018 | 3.336 | 1 |
| 3508 FAS    | ENST00000355740 | p.G88E   | c.263   | 0.063320652 | 7.523 | 1 |
| 3508 FAS    | ENST00000355740 | p.N124H  | c.370   | 1.0054369   | 0     | 1 |
| 3508 FAS    | ENST00000355740 | p.N124S  | c.371   | 1.0054369   | 0     | 1 |
| 3509 SCARB2 | ENST00000264896 | p.S236P  | c.706   | 0.001805983 | 0     | 1 |
| 3509 SCARB2 | ENST00000264896 | p.Y267C  | c.800   | 0.001805983 | 9.113 | 1 |
| 3510 EIF4G1 | ENST00000382330 | p.E1258Q | c.3772  | 1.006434305 | 0     | 1 |
| 3510 EIF4G1 | ENST00000382330 | p.E1258D | c.3774  | 1.006434305 | 0     | 1 |
| 3510 EIF4G1 | ENST00000382330 | p.T1293M | c.3878  | 0.021569056 | 7.28  | 1 |
| 3511 LIG4   | ENST00000356922 | p.E76D   | c.228   | 0.015799251 | 0     | 1 |
| 3511 LIG4   | ENST00000356922 | p.D153Y  | c.457   | 0.015799251 | 5.984 | 1 |
| 3512 GRM3   | ENST00000361669 | p.E203Q  | c.607   | 0.275547134 | 5.006 | 1 |
| 3512 GRM3   | ENST00000361669 | p.R206C  | c.616   | 1.177015068 | 0     | 2 |
| 3512 GRM3   | ENST00000361669 | p.R237P  | c.710   | 0.50509605  | 2.777 | 1 |
| 3513 LINGO1 | ENST00000355300 | p.A277P  | c.829   | 0.031995216 | 0     | 1 |
| 3513 LINGO1 | ENST00000355300 | p.P298L  | c.893   | 0.031995216 | 4.966 | 1 |
| 3514 PDGFA  | ENST00000354513 | p.R107W  | c.319   | 0.003871209 | 8.013 | 1 |

|               |                 |          |             |             |       |   |
|---------------|-----------------|----------|-------------|-------------|-------|---|
| 3514 PDGFA    | ENST00000354513 | p.V167I  | c.499       | 0.003871209 | 0     | 1 |
| 3515 TFRC     | ENST00000360110 | p.N584S  | c.1751      | 0.008466609 | 6.884 | 1 |
| 3515 TFRC     | ENST00000360110 | p.T143I  | c.428       | 0.008466609 | 0     | 1 |
| 3516 PTGS2    | ENST00000367468 | p.A137S  | c.409       | 0.062283766 | 0     | 1 |
| 3516 PTGS2    | ENST00000367468 | p.R29Q   | c.86        | 0.062283766 | 4.005 | 1 |
| 3517 CD1D     | ENST00000368171 | p.E52K   | c.154       | 0.040582456 | 0     | 1 |
| 3517 CD1D     | ENST00000368171 | p.E259D  | c.777       | 0.040582456 | 4.623 | 1 |
| 3518 ETS2     | ENST00000360214 | p.W106C  | c.318       | 0.087540823 | 0     | 1 |
| 3518 ETS2     | ENST00000360214 | p.M166I  | c.498       | 0.082698215 | 3.596 | 1 |
| 3518 ETS2     | ENST00000360214 | p.I167F  | c.499       | 0.004842608 | 7.69  | 1 |
| 3519 RWDD3    | ENST00000370202 | p.V34L   | c.100       | 0.164367845 | 2.605 | 1 |
| 3519 RWDD3    | ENST00000370202 | p.H56R   | c.167       | 0.164367845 | 0     | 1 |
| 3520 FGFR4    | ENST00000502906 | p.E44D   | c.132       | 0.002238891 | 8.803 | 1 |
| 3520 FGFR4    | ENST00000502906 | p.K157N  | c.471       | 0.003520347 | 0     | 1 |
| 3520 FGFR4    | ENST00000502906 | p.R219C  | c.655       | 0.001281456 | 9.608 | 1 |
| 3521 CECR1    | ENST00000262607 | p.K473I  | c.1418      | 0.040498155 | 4.626 | 1 |
| 3521 CECR1    | ENST00000262607 | p.K498N  | c.1494      | 0.040498155 | 0     | 1 |
| 3522 CFH      | ENST00000367429 | p.D510H  | c.1528      | 0.054939973 | 4.186 | 1 |
| 3522 CFH      | ENST00000367429 | p.G557V  | c.1670      | 0.054939973 | 0     | 1 |
| 3523 ACPP     | ENST00000351273 | p.R43W   | c.127       | 2.04473197  | 0     | 3 |
| 3523 ACPP     | ENST00000351273 | p.D211N  | c.631       | 0.097798931 | 4.939 | 1 |
| 3523 ACPP     | ENST00000351273 | p.H314Y  | c.940       | 0.036396979 | 6.365 | 1 |
| 3524 SNRNP200 | ENST00000323853 | p.P1564S | c.4690      | 0.01074642  | 0     | 1 |
| 3524 SNRNP200 | ENST00000323853 | p.Y1676H | c.5026      | 0.01074642  | 6.54  | 1 |
| 3525 CPSF3    | ENST00000238112 | p.I229V  | c.685       | 0.022608358 | 0     | 1 |
| 3525 CPSF3    | ENST00000238112 | p.P322S  | c.964       | 0.022608358 | 5.467 | 1 |
| 3526 ENO3     | ENST00000518175 | p.I422S  | c.1265_1266 | 0.020011873 | 5.643 | 1 |
| 3526 ENO3     | ENST00000518175 | p.P146L  | c.437       | 0.020011873 | 0     | 1 |
| 3527 PTPN18   | ENST00000175756 | p.N56D   | c.166       | 0.02919773  | 5.098 | 1 |
| 3527 PTPN18   | ENST00000175756 | p.D85N   | c.253       | 0.02919773  | 0     | 1 |
| 3528 ASPA     | ENST00000263080 | p.E40D   | c.120       | 0.017735565 | 9.502 | 1 |
| 3528 ASPA     | ENST00000263080 | p.L115I  | c.343       | 0.103934908 | 0     | 1 |
| 3528 ASPA     | ENST00000263080 | p.I199S  | c.596       | 0.10221303  | 3.568 | 1 |
| 3528 ASPA     | ENST00000263080 | p.H21D   | c.61        | 0.019774556 | 5.777 | 1 |
| 3529 PDE10A   | ENST00000539869 | p.R430K  | c.1289      | 0.033702513 | 0     | 1 |
| 3529 PDE10A   | ENST00000539869 | p.A276V  | c.827       | 0.033702513 | 4.891 | 1 |
| 3530 EPHA7    | ENST00000369303 | p.R724G  | c.2170      | 1.184771313 | 0     | 1 |
| 3530 EPHA7    | ENST00000369303 | p.R724K  | c.2171      | 1.184771313 | 0     | 1 |
| 3530 EPHA7    | ENST00000369303 | p.G833E  | c.2498      | 0.303840032 | 2.744 | 1 |
| 3530 EPHA7    | ENST00000369303 | p.E834K  | c.2500      | 0.076301065 | 4.816 | 1 |
| 3531 GART     | ENST00000381831 | p.P211L  | c.632       | 0.05366034  | 4.22  | 1 |
| 3531 GART     | ENST00000381831 | p.L255I  | c.763       | 0.05366034  | 0     | 1 |
| 3532 C8A      | ENST00000361249 | p.E104K  | c.310       | 0.016064279 | 5.96  | 1 |
| 3532 C8A      | ENST00000361249 | p.S125C  | c.374       | 0.016064279 | 0     | 1 |
| 3533 PSPH     | ENST00000437355 | p.L62V   | c.184       | 1.01167851  | 0     | 2 |
| 3533 PSPH     | ENST00000437355 | p.E154K  | c.460       | 0.02335702  | 6.42  | 1 |
| 3535 GEM      | ENST00000297596 | p.A96S   | c.286       | 0.069616203 | 3.865 | 1 |
| 3535 GEM      | ENST00000297596 | p.R116Q  | c.347       | 0.015343416 | 6.122 | 1 |
| 3535 GEM      | ENST00000297596 | p.R197W  | c.589       | 0.082988815 | 0     | 1 |

|      |        |                 |         |             |             |       |   |
|------|--------|-----------------|---------|-------------|-------------|-------|---|
| 3536 | TLR5   | ENST00000366881 | p.F699L | c.2097      | 0.01801629  | 0     | 1 |
| 3536 | TLR5   | ENST00000366881 | p.R732I | c.2195      | 0.009651708 | 6.695 | 1 |
| 3536 | TLR5   | ENST00000366881 | p.L763F | c.2287      | 0.003991094 | 7.969 | 1 |
| 3536 | TLR5   | ENST00000366881 | p.V792A | c.2375      | 0.004373488 | 7.837 | 1 |
| 3538 | PTK2   | ENST00000519419 | p.H123Y | c.367       | 0.142776241 | 3.074 | 1 |
| 3538 | PTK2   | ENST00000519419 | p.Y127H | c.379       | 0.046390481 | 5.509 | 1 |
| 3538 | PTK2   | ENST00000519419 | p.E183K | c.547       | 0.023961927 | 8.619 | 1 |
| 3538 | PTK2   | ENST00000519419 | p.D184N | c.550       | 0.143253161 | 0     | 1 |
| 3539 | NTRK1  | ENST00000524377 | p.R649W | c.1945      | 1.24511037  | 0     | 1 |
| 3539 | NTRK1  | ENST00000524377 | p.R649L | c.1946      | 1.24511037  | 0     | 1 |
| 3539 | NTRK1  | ENST00000524377 | p.R702C | c.2104      | 1.110221085 | 4.379 | 2 |
| 3539 | NTRK1  | ENST00000524377 | p.D709N | c.2125      | 0.262090225 | 3.017 | 1 |
| 3539 | NTRK1  | ENST00000524377 | p.S712R | c.2136      | 0.056497732 | 5.296 | 1 |
| 3540 | ATG4A  | ENST00000372232 | p.R80H  | c.239       | 0.026846032 | 0     | 1 |
| 3540 | ATG4A  | ENST00000372232 | p.A264E | c.791       | 0.012482061 | 6.324 | 1 |
| 3540 | ATG4A  | ENST00000372232 | p.Y265H | c.793       | 0.005802941 | 7.429 | 1 |
| 3540 | ATG4A  | ENST00000372232 | p.H281R | c.842       | 0.008561029 | 6.868 | 1 |
| 3541 | STK3   | ENST00000523601 | p.R206H | c.617       | 1.243068958 | 0     | 2 |
| 3541 | STK3   | ENST00000523601 | p.T208I | c.623       | 0.007668389 | 9.644 | 1 |
| 3541 | STK3   | ENST00000523601 | p.P254A | c.760       | 0.488806803 | 2.048 | 1 |
| 3542 | CYP7A1 | ENST00000301645 | p.A366V | c.1098_1097 | 0.010294375 | 6.602 | 1 |
| 3542 | CYP7A1 | ENST00000301645 | p.R382Q | c.1145      | 0.041091961 | 4.605 | 1 |
| 3542 | CYP7A1 | ENST00000301645 | p.H77N  | c.229       | 0.051386336 | 0     | 1 |
| 3543 | IFIH1  | ENST00000263642 | p.R618Q | c.1853      | 0.027318082 | 5.194 | 1 |
| 3543 | IFIH1  | ENST00000263642 | p.R705I | c.2114      | 0.027318082 | 0     | 1 |
| 3544 | MARK1  | ENST00000366917 | p.W755R | c.2263      | 1.0036981   | 0     | 2 |
| 3544 | MARK1  | ENST00000366917 | p.N784K | c.2352      | 0.013534267 | 8.079 | 1 |
| 3545 | SNAI1  | ENST00000244050 | p.R243W | c.727       | 1.001999701 | 0     | 1 |
| 3545 | SNAI1  | ENST00000244050 | p.R243Q | c.728       | 1.001999701 | 0     | 1 |
| 3545 | SNAI1  | ENST00000244050 | p.R264H | c.791       | 0.003999402 | 8.966 | 1 |
| 3546 | MERTK  | ENST00000295408 | p.Y676C | c.2027      | 0.227983291 | 0     | 1 |
| 3546 | MERTK  | ENST00000295408 | p.D733Y | c.2197      | 0.227983291 | 2.133 | 1 |
| 3547 | NSMCE1 | ENST00000361439 | p.G74E  | c.221       | 0.007758535 | 7.01  | 1 |
| 3547 | NSMCE1 | ENST00000361439 | p.E30K  | c.88        | 0.007758535 | 0     | 1 |
| 3548 | AGXT   | ENST00000307503 | p.E59K  | c.175       | 0.025898278 | 5.271 | 1 |
| 3548 | AGXT   | ENST00000307503 | p.K61E  | c.181       | 0.010230355 | 6.611 | 1 |
| 3548 | AGXT   | ENST00000307503 | p.Q65L  | c.194       | 0.012335842 | 6.341 | 1 |
| 3548 | AGXT   | ENST00000307503 | p.P11A  | c.31        | 0.048464475 | 0     | 1 |
| 3549 | POFUT2 | ENST00000349485 | p.H91N  | c.271       | 0.045975211 | 4.443 | 1 |
| 3549 | POFUT2 | ENST00000349485 | p.R176G | c.526       | 0.045975211 | 0     | 1 |
| 3550 | PILRA  | ENST00000198536 | p.E60D  | c.180       | 0.100970097 | 0     | 1 |
| 3550 | PILRA  | ENST00000198536 | p.R132W | c.394       | 0.100970097 | 3.308 | 1 |
| 3551 | CYTIP  | ENST00000264192 | p.D84N  | c.250       | 0.119741902 | 3.062 | 1 |
| 3551 | CYTIP  | ENST00000264192 | p.N156S | c.467       | 0.119741902 | 0     | 1 |
| 3552 | ADSSL1 | ENST00000332972 | p.R347C | c.1039      | 0.148987328 | 0     | 1 |
| 3552 | ADSSL1 | ENST00000332972 | p.R381C | c.1141      | 0.138041085 | 2.875 | 1 |
| 3552 | ADSSL1 | ENST00000332972 | p.L303F | c.907       | 0.01440148  | 6.302 | 1 |
| 3553 | AOC3   | ENST00000308423 | p.S364R | c.1092      | 0.013878544 | 6.171 | 1 |
| 3553 | AOC3   | ENST00000308423 | p.D529V | c.1586      | 0.013878544 | 0     | 1 |

|      |          |                 |          |           |             |       |   |
|------|----------|-----------------|----------|-----------|-------------|-------|---|
| 3554 | MMP2     | ENST00000570308 | p.F277V  | c.829     | 0.17210889  | 0     | 1 |
| 3554 | MMP2     | ENST00000570308 | p.T301A  | c.901     | 0.032283561 | 5.147 | 1 |
| 3554 | MMP2     | ENST00000570308 | p.T302K  | c.905     | 0.147947044 | 2.797 | 1 |
| 3555 | GSK3B    | ENST00000316626 | p.A83T   | c.247     | 0.00934882  | 0     | 1 |
| 3555 | GSK3B    | ENST00000316626 | p.R111Q  | c.332     | 0.00934882  | 6.741 | 1 |
| 3556 | PKP1     | ENST00000263946 | p.R441C  | c.1321    | 0.072392502 | 3.815 | 1 |
| 3556 | PKP1     | ENST00000263946 | p.R445H  | c.1334    | 0.020221408 | 5.727 | 1 |
| 3556 | PKP1     | ENST00000263946 | p.E534Q  | c.1600    | 0.089931027 | 0     | 1 |
| 3557 | PIM1     | ENST00000373509 | p.S115R  | c.345     | 0.130787095 | 4.053 | 1 |
| 3557 | PIM1     | ENST00000373509 | p.I119L  | c.355     | 0.270100925 | 3.449 | 1 |
| 3557 | PIM1     | ENST00000373509 | p.H157P  | c.470     | 1.231143848 | 0     | 2 |
| 3557 | PIM1     | ENST00000373509 | p.L182P  | c.545     | 0.244884808 | 3.656 | 1 |
| 3558 | THBS1    | ENST00000260356 | p.S971F  | c.2912    | 0.088449635 | 3.499 | 1 |
| 3558 | THBS1    | ENST00000260356 | p.R1077W | c.3229    | 0.088449635 | 0     | 1 |
| 3559 | NCKAP1   | ENST00000360982 | p.S382F  | c.1145    | 0.0508362   | 0     | 1 |
| 3559 | NCKAP1   | ENST00000360982 | p.R223G  | c.667     | 0.0508362   | 4.298 | 1 |
| 3560 | LIG4     | ENST00000356922 | p.S656C  | c.1967    | 0.038822923 | 0     | 1 |
| 3560 | LIG4     | ENST00000356922 | p.G687C  | c.2059    | 0.015303442 | 6.03  | 1 |
| 3560 | LIG4     | ENST00000356922 | p.S734R  | c.2202    | 0.02351948  | 5.41  | 1 |
| 3561 | SNX3     | ENST00000230085 | p.R45L   | c.134     | 0.013926726 | 6.166 | 1 |
| 3561 | SNX3     | ENST00000230085 | p.E148K  | c.442     | 0.013926726 | 0     | 1 |
| 3562 | OPRK1    | ENST00000265572 | p.P59L   | c.176     | 0.116145084 | 3.106 | 1 |
| 3562 | OPRK1    | ENST00000265572 | p.M121I  | c.363     | 0.116145084 | 0     | 1 |
| 3563 | CCL2     | ENST00000225831 | p.C35Y   | c.104     | 0.207990582 | 0     | 1 |
| 3563 | CCL2     | ENST00000225831 | p.P60T   | c.178     | 0.124629326 | 3.134 | 1 |
| 3563 | CCL2     | ENST00000225831 | p.I65N   | c.194     | 0.104794588 | 3.41  | 1 |
| 3564 | GBP1     | ENST00000370473 | p.H85P   | c.255_254 | 0.032464347 | 4.945 | 1 |
| 3564 | GBP1     | ENST00000370473 | p.K232N  | c.696     | 0.01277972  | 6.29  | 1 |
| 3564 | GBP1     | ENST00000370473 | p.S275N  | c.824     | 0.045244067 | 0     | 1 |
| 3565 | PDE4A    | ENST00000352831 | p.R389H  | c.1166    | 0.010287242 | 0     | 1 |
| 3565 | PDE4A    | ENST00000352831 | p.Q615H  | c.1845    | 0.010287242 | 6.603 | 1 |
| 3566 | TNK2     | ENST00000381916 | p.P263L  | c.788     | 0.021463066 | 5.542 | 1 |
| 3566 | TNK2     | ENST00000381916 | p.D333E  | c.999     | 0.021463066 | 0     | 1 |
| 3567 | LGMN     | ENST00000334869 | p.D102N  | c.304     | 0.038687197 | 0     | 1 |
| 3567 | LGMN     | ENST00000334869 | p.G130D  | c.389     | 0.038687197 | 4.692 | 1 |
| 3568 | CYP11B2  | ENST00000323110 | p.R181Q  | c.542     | 0.0140833   | 0     | 1 |
| 3568 | CYP11B2  | ENST00000323110 | p.R208W  | c.622     | 0.006319386 | 7.306 | 1 |
| 3568 | CYP11B2  | ENST00000323110 | p.R282H  | c.845     | 0.007763915 | 7.009 | 1 |
| 3569 | ANAPC10  | ENST00000309439 | p.V74M   | c.220     | 0.068630801 | 3.865 | 1 |
| 3569 | ANAPC10  | ENST00000309439 | p.Y159C  | c.476     | 0.068630801 | 0     | 1 |
| 3570 | SERPINA3 | ENST00000467132 | p.D407N  | c.1219    | 1.164518761 | 0     | 2 |
| 3570 | SERPINA3 | ENST00000467132 | p.V54G   | c.161     | 0.270454969 | 2.909 | 1 |
| 3570 | SERPINA3 | ENST00000467132 | p.T125S  | c.373     | 0.06693839  | 4.994 | 1 |
| 3571 | CYP7A1   | ENST00000301645 | p.D494N  | c.1480    | 0.119741902 | 3.062 | 1 |
| 3571 | CYP7A1   | ENST00000301645 | p.S173Y  | c.518     | 0.119741902 | 0     | 1 |
| 3572 | KLK3     | ENST00000598145 | p.P181S  | c.541     | 0.028924163 | 0     | 1 |
| 3572 | KLK3     | ENST00000598145 | p.K225N  | c.675     | 0.023533214 | 6.061 | 1 |
| 3572 | KLK3     | ENST00000598145 | p.A231T  | c.691     | 0.013946046 | 6.164 | 1 |
| 3573 | HAT1     | ENST00000264108 | p.E206Q  | c.616     | 0.012638771 | 6.306 | 1 |

|               |                 |           |             |             |       |   |
|---------------|-----------------|-----------|-------------|-------------|-------|---|
| 3573 HAT1     | ENST00000264108 | p.H252R   | c.755       | 0.012638771 | 0     | 1 |
| 3574 C1R      | ENST00000542285 | p.L452M   | c.1354      | 0.091355309 | 0     | 1 |
| 3574 C1R      | ENST00000542285 | p.D505G   | c.1514      | 0.009739072 | 6.682 | 1 |
| 3574 C1R      | ENST00000542285 | p.A507T   | c.1519      | 0.081616237 | 3.615 | 1 |
| 3575 STRADA   | ENST00000336174 | p.E65D    | c.195       | 0.012421645 | 6.331 | 1 |
| 3575 STRADA   | ENST00000336174 | p.A139V   | c.416       | 0.012421645 | 0     | 1 |
| 3576 PAIP1    | ENST00000306846 | p.L166V   | c.496       | 0.083098549 | 0     | 1 |
| 3576 PAIP1    | ENST00000306846 | p.Q207H   | c.621       | 0.081262827 | 3.803 | 1 |
| 3576 PAIP1    | ENST00000306846 | p.M217K   | c.650       | 0.011454037 | 6.448 | 1 |
| 3577 GIMAP1   | ENST00000307194 | p.V150I   | c.448       | 0.026772404 | 5.603 | 1 |
| 3577 GIMAP1   | ENST00000307194 | p.R184L   | c.551       | 0.082085985 | 0     | 1 |
| 3577 GIMAP1   | ENST00000307194 | p.M207N   | c.620_621   | 0.067709422 | 4.023 | 1 |
| 3578 SETD7    | ENST00000274031 | p.T203S   | c.607       | 0.037343475 | 5.743 | 1 |
| 3578 SETD7    | ENST00000274031 | p.R312C   | c.934       | 1.018671738 | 0     | 2 |
| 3579 LIG1     | ENST00000263274 | p.D600N   | c.1798_1797 | 0.126131454 | 2.987 | 1 |
| 3579 LIG1     | ENST00000263274 | p.R641G   | c.1921      | 0.126131454 | 0     | 1 |
| 3580 DARS     | ENST00000264161 | p.R207Q   | c.620       | 0.10431366  | 0     | 1 |
| 3580 DARS     | ENST00000264161 | p.I268M   | c.804       | 0.10431366  | 3.261 | 1 |
| 3581 CD80     | ENST00000264246 | p.C50R    | c.148       | 0.023019495 | 5.441 | 1 |
| 3581 CD80     | ENST00000264246 | p.N97H    | c.289       | 0.023019495 | 0     | 1 |
| 3582 PRPF31   | ENST00000321030 | p.V234L   | c.700       | 0.002972721 | 8.394 | 1 |
| 3582 PRPF31   | ENST00000321030 | p.G272D   | c.815       | 0.002972721 | 0     | 1 |
| 3583 KARS     | ENST00000319410 | p.E367K   | c.1099      | 0.007233953 | 7.111 | 1 |
| 3583 KARS     | ENST00000319410 | p.I579N   | c.1736      | 0.007233953 | 0     | 1 |
| 3584 SH3BP2   | ENST00000503393 | p.S521F   | c.1562      | 0.005090419 | 7.618 | 1 |
| 3584 SH3BP2   | ENST00000503393 | p.Y568H   | c.1702      | 0.005090419 | 0     | 1 |
| 3585 ALK      | ENST00000389048 | p.E1242K  | c.3724      | 0.017985773 | 5.797 | 1 |
| 3585 ALK      | ENST00000389048 | p.S1308Y  | c.3923      | 0.017985773 | 0     | 1 |
| 3586 DDIT4    | ENST00000307365 | p.H91R    | c.272       | 0.007672966 | 0     | 1 |
| 3586 DDIT4    | ENST00000307365 | p.Y136C   | c.407       | 0.007672966 | 7.026 | 1 |
| 3587 TYK2     | ENST00000264818 | p.R703L   | c.2108      | 0.066754088 | 0     | 1 |
| 3587 TYK2     | ENST00000264818 | p.E812D   | c.2436      | 0.066754088 | 3.905 | 1 |
| 3588 VRK3     | ENST00000594948 | p.A240V   | c.719       | 0.151715077 | 0     | 1 |
| 3588 VRK3     | ENST00000594948 | p.F296L   | c.888       | 0.044499918 | 7.502 | 1 |
| 3588 VRK3     | ENST00000594948 | p.LA324FS | c.973_972   | 0.146198458 | 2.774 | 1 |
| 3589 ACOT12   | ENST00000307624 | p.C40F    | c.119       | 0.030039404 | 6.057 | 1 |
| 3589 ACOT12   | ENST00000307624 | p.R244C   | c.730       | 1.031364779 | 0     | 1 |
| 3589 ACOT12   | ENST00000307624 | p.R244H   | c.731       | 1.031364779 | 0     | 1 |
| 3589 ACOT12   | ENST00000307624 | p.R279C   | c.835       | 0.032690154 | 5.935 | 1 |
| 3590 SERPINB1 | ENST00000380739 | p.S377Y   | c.1130      | 0.001636694 | 0     | 1 |
| 3590 SERPINB1 | ENST00000380739 | p.S20N    | c.59        | 0.001636694 | 9.255 | 1 |
| 3591 CA2      | ENST00000285379 | p.W97L    | c.290       | 0.267572175 | 0     | 1 |
| 3591 CA2      | ENST00000285379 | p.R226C   | c.676       | 0.267572175 | 1.902 | 1 |
| 3592 EPRS     | ENST00000366923 | p.E1184K  | c.3550      | 0.019818616 | 0     | 1 |
| 3592 EPRS     | ENST00000366923 | p.N1271H  | c.3811      | 0.019818616 | 5.657 | 1 |
| 3593 ANPEP    | ENST00000300060 | p.E912K   | c.2734      | 0.025207555 | 6.31  | 1 |
| 3593 ANPEP    | ENST00000300060 | p.T944M   | c.2831      | 1.012603777 | 0     | 2 |
| 3594 SOD1     | ENST00000270142 | p.H111N   | c.331       | 0.021226348 | 0     | 1 |
| 3594 SOD1     | ENST00000270142 | p.V149A   | c.446       | 0.021226348 | 5.558 | 1 |

|               |                 |                    |           |             |       |   |
|---------------|-----------------|--------------------|-----------|-------------|-------|---|
| 3595 MAD2L1   | ENST00000296509 | p.S195G            | c.583     | 0.0625      | 0     | 1 |
| 3595 MAD2L1   | ENST00000296509 | p.F23L             | c.69      | 0.0625      | 4     | 1 |
| 3596 DPP4     | ENST00000360534 | p.K539N            | c.1617    | 0.082035718 | 9.896 | 1 |
| 3596 DPP4     | ENST00000360534 | p.D620G            | c.1859    | 0.106196404 | 6.251 | 1 |
| 3596 DPP4     | ENST00000360534 | p.F763L            | c.2287    | 1.014179462 | 0     | 2 |
| 3597 SMS      | ENST00000404933 | p.D239Y            | c.715     | 0.017775082 | 5.814 | 1 |
| 3597 SMS      | ENST00000404933 | p.E269K            | c.805     | 0.051832472 | 4.27  | 1 |
| 3597 SMS      | ENST00000404933 | p.K304I            | c.911     | 0.069607553 | 0     | 1 |
| 3598 SIRPA    | ENST00000400068 | p.P74Q             | c.221     | 0.247059099 | 4.339 | 1 |
| 3598 SIRPA    | ENST00000400068 | p.D131in_frame_del | c.387_389 | 4.04941182  | 0     | 5 |
| 3599 SOCS2    | ENST00000551556 | p.I72N             | c.215     | 0.013237695 | 8.404 | 1 |
| 3599 SOCS2    | ENST00000551556 | p.R96Q             | c.287     | 1.002952187 | 0     | 2 |
| 3600 RAB25    | ENST00000361084 | p.R52S             | c.154     | 0.030522142 | 0     | 1 |
| 3600 RAB25    | ENST00000361084 | p.R31Q             | c.92      | 0.030522142 | 5.034 | 1 |
| 3601 HK1      | ENST00000448642 | p.A427T            | c.1279    | 0.023949274 | 0     | 1 |
| 3601 HK1      | ENST00000448642 | p.R77C             | c.229     | 0.011501772 | 6.442 | 1 |
| 3601 HK1      | ENST00000448642 | p.K80N             | c.240     | 0.012447502 | 6.328 | 1 |
| 3602 HGFAC    | ENST00000511533 | p.D571N            | c.1711    | 0.011398596 | 0     | 1 |
| 3602 HGFAC    | ENST00000511533 | p.G621S            | c.1861    | 0.011398596 | 6.455 | 1 |
| 3603 GZMH     | ENST00000216338 | p.R125W            | c.373     | 0.038954305 | 5.868 | 1 |
| 3603 GZMH     | ENST00000216338 | p.D210G            | c.629     | 0.030145911 | 6.297 | 1 |
| 3603 GZMH     | ENST00000216338 | p.R32C             | c.94      | 1.029839921 | 0     | 1 |
| 3603 GZMH     | ENST00000216338 | p.R32H             | c.95      | 1.029839921 | 0     | 1 |
| 3604 CRYBB2   | ENST00000398215 | p.G57K             | c.169_170 | 0.039637231 | 0     | 1 |
| 3604 CRYBB2   | ENST00000398215 | p.L97M             | c.289     | 0.039637231 | 4.657 | 1 |
| 3605 GAD1     | ENST00000358196 | p.H404Y            | c.1210    | 0.036676506 | 0     | 1 |
| 3605 GAD1     | ENST00000358196 | p.G252C            | c.754     | 0.036676506 | 4.769 | 1 |
| 3606 SEC24C   | ENST00000345254 | p.R868C            | c.2602    | 0.033839118 | 4.94  | 1 |
| 3606 SEC24C   | ENST00000345254 | p.K913N            | c.2739    | 0.071317921 | 0     | 1 |
| 3606 SEC24C   | ENST00000345254 | p.S1077F           | c.3230    | 0.040002929 | 4.69  | 1 |
| 3607 JAK1     | ENST00000342505 | p.Q980L            | c.2939    | 0.010731533 | 6.542 | 1 |
| 3607 JAK1     | ENST00000342505 | p.L1153F           | c.3459    | 0.010731533 | 0     | 1 |
| 3608 DAAM1    | ENST00000351081 | p.V787M            | c.2359    | 0.010459807 | 0     | 1 |
| 3608 DAAM1    | ENST00000351081 | p.A935D            | c.2804    | 0.010459807 | 6.579 | 1 |
| 3609 PLCB3    | ENST00000279230 | p.E717K            | c.2149    | 1.005999259 | 0     | 2 |
| 3609 PLCB3    | ENST00000279230 | p.D757N            | c.2269    | 0.011998518 | 7.381 | 1 |
| 3610 SULT1C3  | ENST00000376700 | p.P141S            | c.421     | 1.086449414 | 0     | 2 |
| 3611 DDB1     | ENST00000301764 | p.L631V            | c.1891    | 0.13570656  | 3.059 | 1 |
| 3611 DDB1     | ENST00000301764 | p.K709N            | c.2127    | 0.023674657 | 5.564 | 1 |
| 3611 DDB1     | ENST00000301764 | p.R713C            | c.2137    | 0.144765339 | 9.595 | 1 |
| 3611 DDB1     | ENST00000301764 | p.T1022I           | c.3065    | 0.010720287 | 6.707 | 1 |
| 3611 DDB1     | ENST00000301764 | p.R1138Q           | c.3413    | 0.151994227 | 0     | 1 |
| 3612 SERPING1 | ENST00000403558 | p.F464V            | c.1390    | 0.059167576 | 0     | 1 |
| 3612 SERPING1 | ENST00000403558 | p.N222K            | c.666     | 0.023666661 | 5.401 | 1 |
| 3612 SERPING1 | ENST00000403558 | p.I230M            | c.690     | 0.035500915 | 4.816 | 1 |
| 3613 TTPA     | ENST00000260116 | p.R77S             | c.231     | 0.045122787 | 0     | 1 |
| 3613 TTPA     | ENST00000260116 | p.E141D            | c.423     | 0.045122787 | 4.47  | 1 |
| 3614 BHMT     | ENST00000274353 | p.R57C             | c.169     | 1.031995216 | 0     | 1 |
| 3614 BHMT     | ENST00000274353 | p.R57H             | c.170     | 1.031995216 | 0     | 1 |

|              |                 |         |           |             |       |   |
|--------------|-----------------|---------|-----------|-------------|-------|---|
| 3614 BHMT    | ENST00000274353 | p.E113K | c.337     | 0.063990431 | 4.966 | 1 |
| 3615 PYGM    | ENST00000164139 | p.R650G | c.1948    | 0.078563336 | 3.67  | 1 |
| 3615 PYGM    | ENST00000164139 | p.D129N | c.385     | 0.078563336 | 0     | 1 |
| 3616 UPF2    | ENST00000357604 | p.N682H | c.2044    | 0.144653215 | 2.806 | 1 |
| 3616 UPF2    | ENST00000357604 | p.L688S | c.2063    | 0.018056455 | 6.427 | 1 |
| 3616 UPF2    | ENST00000357604 | p.R723K | c.2168    | 0.154613354 | 0     | 1 |
| 3617 FTMT    | ENST00000321339 | p.F111V | c.331     | 0.055940307 | 0     | 1 |
| 3617 FTMT    | ENST00000321339 | p.L157R | c.470     | 0.037034149 | 4.755 | 1 |
| 3617 FTMT    | ENST00000321339 | p.A159V | c.476     | 0.018906158 | 5.725 | 1 |
| 3618 GUSB    | ENST00000304895 | p.A380T | c.1138    | 1.111259467 | 0     | 1 |
| 3618 GUSB    | ENST00000304895 | p.A380V | c.1139    | 1.111259467 | 0     | 1 |
| 3618 GUSB    | ENST00000304895 | p.V402A | c.1205    | 0.222518933 | 3.168 | 1 |
| 3619 GRHPR   | ENST00000607784 | p.A24V  | c.71      | 0.010709241 | 6.545 | 1 |
| 3619 GRHPR   | ENST00000607784 | p.R25W  | c.73      | 0.01179239  | 6.406 | 1 |
| 3620 ALDH3A1 | ENST00000444455 | p.I71T  | c.212     | 0.077213665 | 3.695 | 1 |
| 3620 ALDH3A1 | ENST00000444455 | p.L33M  | c.97      | 0.077213665 | 0     | 1 |
| 3621 CHAT    | ENST00000337653 | p.A631P | c.1891    | 0.023568439 | 5.407 | 1 |
| 3621 CHAT    | ENST00000337653 | p.L175I | c.522_523 | 0.023568439 | 0     | 1 |
| 3622 CRMP1   | ENST00000324989 | p.S541L | c.1622    | 0.167492118 | 2.757 | 1 |
| 3622 CRMP1   | ENST00000324989 | p.A542V | c.1625    | 0.136129683 | 3.14  | 1 |
| 3622 CRMP1   | ENST00000324989 | p.D201H | c.601     | 0.261371272 | 0     | 1 |
| 3623 PDGFRB  | ENST00000261799 | p.V51F  | c.151     | 0.083380526 | 4.669 | 1 |
| 3623 PDGFRB  | ENST00000261799 | p.V84M  | c.250     | 1.039308905 | 0     | 2 |
| 3624 SNAP25  | ENST00000304886 | p.K40T  | c.119     | 0.005896195 | 0     | 1 |
| 3624 SNAP25  | ENST00000304886 | p.G158E | c.473     | 0.005896195 | 7.406 | 1 |
| 3625 ARF1    | ENST00000541182 | p.V91M  | c.271     | 0.223401934 | 0     | 1 |
| 3625 ARF1    | ENST00000541182 | p.A125T | c.373     | 0.143660868 | 2.926 | 1 |
| 3625 ARF1    | ENST00000541182 | p.L25M  | c.73      | 0.103905014 | 3.445 | 1 |
| 3626 MS4A1   | ENST00000345732 | p.C81Y  | c.242     | 0.012700244 | 7.299 | 1 |
| 3626 MS4A1   | ENST00000345732 | p.G115K | c.343_344 | 1.006350122 | 0     | 1 |
| 3626 MS4A1   | ENST00000345732 | p.G115E | c.344     | 1.006350122 | 0     | 1 |
| 3627 GLRX3   | ENST00000481034 | p.A43P  | c.127     | 0.048361406 | 4.37  | 1 |
| 3627 GLRX3   | ENST00000481034 | p.P86S  | c.256     | 0.048361406 | 0     | 1 |
| 3628 CYP2E1  | ENST00000252945 | p.A352V | c.1055    | 0.060622619 | 4.044 | 1 |
| 3628 CYP2E1  | ENST00000252945 | p.E320A | c.959     | 0.060622619 | 0     | 1 |
| 3629 CTSE    | ENST00000361052 | p.A113T | c.337     | 0.114070686 | 0     | 1 |
| 3629 CTSE    | ENST00000361052 | p.S173C | c.517     | 0.114070686 | 3.132 | 1 |
| 3630 ARL2    | ENST00000246747 | p.A159T | c.475     | 0.068726009 | 0     | 1 |
| 3630 ARL2    | ENST00000246747 | p.T31I  | c.92      | 0.068726009 | 3.863 | 1 |
| 3631 GJB2    | ENST00000382844 | p.F146L | c.438     | 0.00579892  | 7.43  | 1 |
| 3631 GJB2    | ENST00000382844 | p.F150L | c.450     | 0.008338479 | 6.906 | 1 |
| 3631 GJB2    | ENST00000382844 | p.R32C  | c.94      | 0.014137399 | 0     | 1 |
| 3632 BLVRA   | ENST00000265523 | p.L95F  | c.283     | 0.158109943 | 3.661 | 1 |
| 3632 BLVRA   | ENST00000265523 | p.L129F | c.387     | 0.010424395 | 7.808 | 1 |
| 3632 BLVRA   | ENST00000265523 | p.R23W  | c.67      | 1.083517261 | 0     | 1 |
| 3632 BLVRA   | ENST00000265523 | p.R23Q  | c.68      | 1.083517261 | 0     | 1 |
| 3633 EPHX2   | ENST00000521400 | p.E394K | c.1180    | 0.102537253 | 0     | 1 |
| 3633 EPHX2   | ENST00000521400 | p.G426V | c.1277    | 0.092461719 | 3.435 | 1 |
| 3633 EPHX2   | ENST00000521400 | p.N431D | c.1291    | 0.010075533 | 6.633 | 1 |

|             |                 |                   |           |             |       |   |
|-------------|-----------------|-------------------|-----------|-------------|-------|---|
| 3634 RYR2   | ENST00000360064 | p.L368Q           | c.1103    | 0.011581774 | 6.432 | 1 |
| 3634 RYR2   | ENST00000360064 | p.E394K           | c.1180    | 0.011581774 | 0     | 1 |
| 3635 FURIN  | ENST00000268171 | p.R498H           | c.1493    | 0.007011797 | 7.156 | 1 |
| 3635 FURIN  | ENST00000268171 | p.T554I           | c.1661    | 0.007011797 | 0     | 1 |
| 3636 EPHA1  | ENST00000275815 | p.P914L           | c.2741    | 0.108199333 | 3.304 | 1 |
| 3636 EPHA1  | ENST00000275815 | p.R926G           | c.2776    | 0.075579699 | 3.865 | 1 |
| 3636 EPHA1  | ENST00000275815 | p.R966C           | c.2896    | 0.169881235 | 0     | 1 |
| 3637 ESRRB  | ENST00000512784 | p.C111Y           | c.332     | 0.179742067 | 2.476 | 1 |
| 3637 ESRRB  | ENST00000512784 | p.T153I           | c.458     | 0.179742067 | 0     | 1 |
| 3638 APBA1  | ENST00000265381 | p.G793R           | c.2377    | 0.07065816  | 3.823 | 1 |
| 3638 APBA1  | ENST00000265381 | p.H816Y           | c.2446    | 0.07065816  | 0     | 1 |
| 3639 DNMT3L | ENST00000270172 | p.V285L           | c.853     | 0.023067418 | 7.437 | 1 |
| 3639 DNMT3L | ENST00000270172 | p.V307A           | c.920     | 1.005770852 | 0     | 2 |
| 3640 DCC    | ENST00000442544 | p.P432L           | c.1295    | 0.040712042 | 4.79  | 1 |
| 3640 DCC    | ENST00000442544 | p.D434N           | c.1300    | 0.130871967 | 2.985 | 1 |
| 3640 DCC    | ENST00000442544 | p.Q515E           | c.1543    | 0.162452937 | 0     | 1 |
| 3641 RPL7A  | ENST00000323345 | p.Q94R            | c.281     | 0.024484287 | 0     | 1 |
| 3641 RPL7A  | ENST00000323345 | p.A214T           | c.640     | 0.024484287 | 5.352 | 1 |
| 3642 PDK2   | ENST00000503176 | p.E56Q            | c.166     | 0.117440344 | 0     | 1 |
| 3642 PDK2   | ENST00000503176 | p.P28Q            | c.83      | 0.117440344 | 3.09  | 1 |
| 3643 CUTC   | ENST00000370476 | p.S34L            | c.101     | 0.040798658 | 6.148 | 1 |
| 3643 CUTC   | ENST00000370476 | p.V39M            | c.115     | 0.11770635  | 3.145 | 1 |
| 3643 CUTC   | ENST00000370476 | p.R94L            | c.281     | 0.132127749 | 0     | 1 |
| 3643 CUTC   | ENST00000370476 | p.V255L           | c.763     | 0.033146471 | 7.65  | 1 |
| 3644 MTRR   | ENST00000264668 | p.S481L           | c.1442    | 0.158210066 | 3.24  | 1 |
| 3644 MTRR   | ENST00000264668 | p.R552Q           | c.1655    | 0.034752299 | 5.035 | 1 |
| 3644 MTRR   | ENST00000264668 | p.P578S           | c.1732    | 0.083700949 | 4.898 | 1 |
| 3644 MTRR   | ENST00000264668 | p.D722N           | c.2164    | 0.169883541 | 0     | 1 |
| 3645 PYGM   | ENST00000164139 | p.G165W           | c.493     | 1.021522657 | 0     | 1 |
| 3645 PYGM   | ENST00000164139 | p.G165V           | c.494     | 1.021522657 | 0     | 1 |
| 3645 PYGM   | ENST00000164139 | p.R278C           | c.832     | 0.043045314 | 5.538 | 1 |
| 3646 ACO1   | ENST00000379923 | p.P443L           | c.1328    | 0.007839623 | 0     | 1 |
| 3646 ACO1   | ENST00000379923 | p.D292N           | c.874     | 0.007839623 | 6.995 | 1 |
| 3647 PRKAB1 | ENST00000229328 | p.G88R            | c.262     | 1.018568486 | 0     | 2 |
| 3647 PRKAB1 | ENST00000229328 | p.N110S           | c.329     | 0.037136972 | 5.751 | 1 |
| 3648 DNMT3A | ENST00000321117 | p.D781G           | c.2342    | 0.051810026 | 0     | 1 |
| 3648 DNMT3A | ENST00000321117 | p.R803S           | c.2409    | 0.022143084 | 5.497 | 1 |
| 3648 DNMT3A | ENST00000321117 | p.P804S           | c.2410    | 0.029666941 | 5.075 | 1 |
| 3649 BAI3   | ENST00000370598 | p.A509P           | c.1525    | 0.002436456 | 0     | 1 |
| 3649 BAI3   | ENST00000370598 | p.G555V           | c.1664    | 0.002436456 | 8.681 | 1 |
| 3650 OBFC1  | ENST00000224950 | p.I84in_frame_del | c.253_251 | 0.013267129 | 6.236 | 1 |
| 3650 OBFC1  | ENST00000224950 | p.R139H           | c.416     | 0.013267129 | 0     | 1 |
| 3651 AMY2A  | ENST00000414303 | p.V80F            | c.238     | 0.07124833  | 3.811 | 1 |
| 3651 AMY2A  | ENST00000414303 | p.S132R           | c.396     | 0.07124833  | 0     | 1 |
| 3652 KAT8   | ENST00000448516 | p.W192S           | c.575     | 0.028120511 | 5.253 | 1 |
| 3652 KAT8   | ENST00000448516 | p.L271Q           | c.812     | 0.098566565 | 0     | 1 |
| 3652 KAT8   | ENST00000448516 | p.Y301H           | c.901     | 0.074240224 | 3.789 | 1 |
| 3653 PPCDC  | ENST00000342932 | p.R92Q            | c.275     | 0.007494251 | 0     | 1 |
| 3653 PPCDC  | ENST00000342932 | p.R125Q           | c.374     | 0.007494251 | 7.06  | 1 |



|               |                 |          |           |             |       |   |
|---------------|-----------------|----------|-----------|-------------|-------|---|
| 3654 ALB      | ENST00000295897 | p.P390S  | c.1168    | 0.022189177 | 5.494 | 1 |
| 3654 ALB      | ENST00000295897 | p.E566Q  | c.1696    | 0.022189177 | 0     | 1 |
| 3655 PIK3C3   | ENST00000262039 | p.I445L  | c.1333    | 0.070462526 | 0     | 1 |
| 3655 PIK3C3   | ENST00000262039 | p.R522I  | c.1565    | 0.070462526 | 3.827 | 1 |
| 3656 CR1      | ENST00000367052 | p.N1361K | c.4083    | 0.005425606 | 7.526 | 1 |
| 3656 CR1      | ENST00000367052 | p.L1389F | c.4165    | 0.005425606 | 0     | 1 |
| 3657 MGAM     | ENST00000475668 | p.M1118I | c.3354    | 2.119658932 | 0     | 3 |
| 3657 MGAM     | ENST00000475668 | p.P1445L | c.4334    | 0.358976797 | 3.063 | 1 |
| 3658 UBTF     | ENST00000302904 | p.G479D  | c.1436    | 0.301243079 | 1.731 | 1 |
| 3658 UBTF     | ENST00000302904 | p.M548I  | c.1644    | 0.301243079 | 0     | 1 |
| 3659 KCNMA1   | ENST00000404771 | p.R754S  | c.2260    | 1.015155655 | 0     | 1 |
| 3659 KCNMA1   | ENST00000404771 | p.R754H  | c.2261    | 1.015155655 | 0     | 1 |
| 3659 KCNMA1   | ENST00000404771 | p.E1025Q | c.3073    | 0.045785417 | 6.044 | 1 |
| 3660 KIF11    | ENST00000260731 | p.N271S  | c.812     | 0.111139409 | 3.185 | 1 |
| 3660 KIF11    | ENST00000260731 | p.L292M  | c.873_874 | 0.120717463 | 0     | 1 |
| 3660 KIF11    | ENST00000260731 | p.T317P  | c.949     | 0.011944603 | 6.538 | 1 |
| 3661 PRPF4B   | ENST00000480058 | p.L724V  | c.2170    | 0.005652089 | 7.467 | 1 |
| 3661 PRPF4B   | ENST00000480058 | p.G836V  | c.2507    | 0.005652089 | 0     | 1 |
| 3662 STS      | ENST00000217961 | p.W135L  | c.404     | 0.111025944 | 0     | 1 |
| 3662 STS      | ENST00000217961 | p.F159L  | c.477     | 0.039907681 | 4.75  | 1 |
| 3662 STS      | ENST00000217961 | p.S163Y  | c.488     | 0.07660818  | 3.759 | 1 |
| 3663 VWF      | ENST00000261405 | p.E1709K | c.5125    | 0.010287242 | 6.603 | 1 |
| 3663 VWF      | ENST00000261405 | p.R1830C | c.5488    | 0.016515907 | 5.92  | 1 |
| 3663 VWF      | ENST00000261405 | p.R1853Q | c.5558    | 0.026803148 | 0     | 1 |
| 3664 ACE2     | ENST00000427411 | p.E375D  | c.1125    | 0.01170282  | 6.417 | 1 |
| 3664 ACE2     | ENST00000427411 | p.S409L  | c.1226    | 0.01929116  | 0     | 1 |
| 3664 ACE2     | ENST00000427411 | p.C542R  | c.1624    | 0.00758834  | 7.042 | 1 |
| 3665 PPIP5K2  | ENST00000358359 | p.I131L  | c.391     | 0.109879945 | 4.186 | 1 |
| 3665 PPIP5K2  | ENST00000358359 | p.G324A  | c.971     | 1.054939973 | 0     | 1 |
| 3665 PPIP5K2  | ENST00000358359 | p.G324D  | c.971     | 1.054939973 | 0     | 1 |
| 3666 BPI      | ENST00000262865 | p.P368H  | c.1103    | 0.01751822  | 0     | 1 |
| 3666 BPI      | ENST00000262865 | p.M436I  | c.1308    | 0.01751822  | 5.835 | 1 |
| 3667 SIRT6    | ENST00000337491 | p.A53V   | c.158     | 0.020081349 | 5.638 | 1 |
| 3667 SIRT6    | ENST00000337491 | p.A89S   | c.265     | 0.018517075 | 5.755 | 1 |
| 3667 SIRT6    | ENST00000337491 | p.D116N  | c.346     | 0.038598424 | 0     | 1 |
| 3668 COMP     | ENST00000222271 | p.D530N  | c.1588    | 0.002297053 | 8.766 | 1 |
| 3668 COMP     | ENST00000222271 | p.E583Q  | c.1747    | 0.146401273 | 2.772 | 1 |
| 3668 COMP     | ENST00000222271 | p.R740C  | c.2218    | 0.148698326 | 0     | 1 |
| 3669 XYLB     | ENST00000207870 | p.T465A  | c.1393    | 0.065953746 | 4.297 | 1 |
| 3669 XYLB     | ENST00000207870 | p.S468L  | c.1403    | 0.336838105 | 1.754 | 1 |
| 3669 XYLB     | ENST00000207870 | p.V23F   | c.67      | 0.015015522 | 8.186 | 1 |
| 3669 XYLB     | ENST00000207870 | p.S284L  | c.851     | 0.35412136  | 0     | 1 |
| 3669 XYLB     | ENST00000207870 | p.R289S  | c.867     | 0.249967598 | 8.227 | 1 |
| 3670 ENPEP    | ENST00000265162 | p.V445A  | c.1334    | 0.173975096 | 0     | 1 |
| 3670 ENPEP    | ENST00000265162 | p.S484F  | c.1451    | 0.111789868 | 3.258 | 1 |
| 3670 ENPEP    | ENST00000265162 | p.H623Y  | c.1867    | 0.089456536 | 3.848 | 1 |
| 3671 IPO13    | ENST00000372343 | p.V790G  | c.2369    | 0.014091803 | 6.149 | 1 |
| 3671 IPO13    | ENST00000372343 | p.S837Y  | c.2510    | 0.014091803 | 0     | 1 |
| 3672 APOBEC3C | ENST00000361441 | p.K10R   | c.29_30   | 0.024586326 | 5.346 | 1 |

|               |                 |         |             |             |       |   |
|---------------|-----------------|---------|-------------|-------------|-------|---|
| 3672 APOBEC3C | ENST00000361441 | p.K154E | c.460       | 0.024586326 | 0     | 1 |
| 3673 MYO1C    | ENST00000359786 | p.R624C | c.1870      | 0.116675162 | 0     | 1 |
| 3673 MYO1C    | ENST00000359786 | p.S139Y | c.416       | 0.112656308 | 3.15  | 1 |
| 3673 MYO1C    | ENST00000359786 | p.A149V | c.446       | 0.015105756 | 7.959 | 1 |
| 3675 HTRA2    | ENST00000258080 | p.D190N | c.568       | 0.03489103  | 4.841 | 1 |
| 3675 HTRA2    | ENST00000258080 | p.L192I | c.574       | 0.022545761 | 5.471 | 1 |
| 3675 HTRA2    | ENST00000258080 | p.L240F | c.718       | 0.057436791 | 0     | 1 |
| 3676 TAX1BP1  | ENST00000409980 | p.F770I | c.2308      | 0.005715122 | 7.451 | 1 |
| 3676 TAX1BP1  | ENST00000409980 | p.P782H | c.2345_2346 | 0.022112409 | 5.499 | 1 |
| 3676 TAX1BP1  | ENST00000409980 | p.H804N | c.2409_2410 | 0.027827531 | 0     | 1 |
| 3677 PTPRJ    | ENST00000418331 | p.H402Y | c.1204      | 0.118011552 | 0     | 1 |
| 3677 PTPRJ    | ENST00000418331 | p.N431S | c.1292      | 0.118011552 | 3.083 | 1 |
| 3678 KIAA0319 | ENST00000543707 | p.P378L | c.1133      | 0.338681244 | 2.562 | 1 |
| 3678 KIAA0319 | ENST00000543707 | p.G401R | c.1201      | 1.169340622 | 0     | 1 |
| 3678 KIAA0319 | ENST00000543707 | p.G401E | c.1202      | 1.169340622 | 0     | 1 |
| 3679 NCKAP1   | ENST00000360982 | p.L96V  | c.286       | 0.010033717 | 0     | 1 |
| 3679 NCKAP1   | ENST00000360982 | p.N167S | c.500       | 0.010033717 | 6.639 | 1 |
| 3680 CD300A   | ENST00000360141 | p.R74Q  | c.221       | 0.006881792 | 7.183 | 1 |
| 3680 CD300A   | ENST00000360141 | p.E95K  | c.283       | 0.011207044 | 0     | 1 |
| 3680 CD300A   | ENST00000360141 | p.P27T  | c.79        | 0.004325252 | 7.853 | 1 |
| 3681 PKM      | ENST00000319622 | p.P117L | c.350       | 0.041665584 | 4.585 | 1 |
| 3681 PKM      | ENST00000319622 | p.S222L | c.665       | 0.041665584 | 0     | 1 |
| 3682 IL4R     | ENST00000543915 | p.V177M | c.529       | 0.009413846 | 0     | 1 |
| 3682 IL4R     | ENST00000543915 | p.R200W | c.598       | 0.009413846 | 6.731 | 1 |
| 3683 CDC25B   | ENST00000245960 | p.R390Q | c.1169      | 1.084846488 | 0     | 2 |
| 3683 CDC25B   | ENST00000245960 | p.A399G | c.1196      | 0.127200816 | 6.89  | 1 |
| 3683 CDC25B   | ENST00000245960 | p.R506H | c.1517      | 0.263167909 | 3.71  | 1 |
| 3684 ITGAX    | ENST00000562522 | p.L706F | c.2116      | 1.01979116  | 0     | 1 |
| 3684 ITGAX    | ENST00000562522 | p.L706P | c.2117      | 1.01979116  | 0     | 1 |
| 3684 ITGAX    | ENST00000562522 | p.T737M | c.2210      | 0.03958232  | 5.659 | 1 |
| 3685 LCK      | ENST00000333070 | p.E423K | c.1267      | 0.21758715  | 0     | 1 |
| 3685 LCK      | ENST00000333070 | p.G445E | c.1334      | 0.105228441 | 3.417 | 1 |
| 3685 LCK      | ENST00000333070 | p.Q255E | c.763       | 0.135570474 | 3.012 | 1 |
| 3686 TLR4     | ENST00000355622 | p.E270K | c.808       | 0.109727383 | 3.366 | 1 |
| 3686 TLR4     | ENST00000355622 | p.K271T | c.812       | 0.094071359 | 3.607 | 1 |
| 3686 TLR4     | ENST00000355622 | p.Y295C | c.884       | 0.228302295 | 0     | 1 |
| 3686 TLR4     | ENST00000355622 | p.T319N | c.956       | 0.058058008 | 4.344 | 1 |
| 3687 DPYSL3   | ENST00000343218 | p.D202Y | c.604       | 0.009368281 | 7.738 | 1 |
| 3687 DPYSL3   | ENST00000343218 | p.A241D | c.722       | 1.00468414  | 0     | 1 |
| 3687 DPYSL3   | ENST00000343218 | p.A241V | c.722       | 1.00468414  | 0     | 1 |
| 3688 JUP      | ENST00000393931 | p.V340M | c.1018      | 0.00951883  | 0     | 1 |
| 3688 JUP      | ENST00000393931 | p.G298D | c.893       | 0.00951883  | 6.715 | 1 |
| 3689 FDFT1    | ENST00000220584 | p.A55T  | c.163       | 0.009067999 | 6.785 | 1 |
| 3689 FDFT1    | ENST00000220584 | p.M325I | c.975       | 0.009067999 | 0     | 1 |
| 3690 ITGAV    | ENST00000261023 | p.Q828L | c.2483      | 0.073251393 | 3.771 | 1 |
| 3690 ITGAV    | ENST00000261023 | p.L910W | c.2729      | 0.073251393 | 0     | 1 |
| 3691 PEX5     | ENST00000412720 | p.R580H | c.1739      | 0.0095585   | 6.709 | 1 |
| 3691 PEX5     | ENST00000412720 | p.I624M | c.1872      | 0.0095585   | 0     | 1 |
| 3692 ARHGEF11 | ENST00000368194 | p.E901K | c.2701      | 0.006506061 | 0     | 1 |

|               |                 |          |           |             |       |   |
|---------------|-----------------|----------|-----------|-------------|-------|---|
| 3692 ARHGEF11 | ENST00000368194 | p.R1081W | c.3241    | 0.006506061 | 7.264 | 1 |
| 3693 SOS1     | ENST00000426016 | p.M209L  | c.625     | 0.061440657 | 0     | 1 |
| 3693 SOS1     | ENST00000426016 | p.L260P  | c.779     | 0.049240868 | 4.344 | 1 |
| 3693 SOS1     | ENST00000426016 | p.D265N  | c.793     | 0.012199789 | 6.357 | 1 |
| 3694 VRK3     | ENST00000594948 | p.E150K  | c.448     | 0.005165057 | 0     | 1 |
| 3694 VRK3     | ENST00000594948 | p.A206V  | c.617     | 0.005165057 | 7.597 | 1 |
| 3695 CHKA     | ENST00000265689 | p.L144F  | c.430     | 0.152512564 | 0     | 1 |
| 3695 CHKA     | ENST00000265689 | p.E206D  | c.618     | 0.152512564 | 2.713 | 1 |
| 3696 TOP1     | ENST00000361337 | p.R621H  | c.1862    | 0.022797193 | 5.455 | 1 |
| 3696 TOP1     | ENST00000361337 | p.D707H  | c.2119    | 0.022797193 | 0     | 1 |
| 3697 HERC2    | ENST00000261609 | p.C4263R | c.12787   | 0.015581738 | 0     | 1 |
| 3697 HERC2    | ENST00000261609 | p.P4292L | c.12875   | 0.015581738 | 6.004 | 1 |
| 3698 SULT1C2  | ENST00000437390 | p.E63Q   | c.187     | 0.068085062 | 0     | 1 |
| 3698 SULT1C2  | ENST00000437390 | p.S116F  | c.347     | 0.008338479 | 6.906 | 1 |
| 3698 SULT1C2  | ENST00000437390 | p.K228N  | c.684     | 0.065313136 | 4.065 | 1 |
| 3700 PRSS3    | ENST00000361005 | p.G106C  | c.316     | 0.017603425 | 5.828 | 1 |
| 3700 PRSS3    | ENST00000361005 | p.S257F  | c.770     | 0.017603425 | 0     | 1 |
| 3701 DPYSL2   | ENST00000311151 | p.C179Y  | c.536     | 0.161880375 | 2.627 | 1 |
| 3701 DPYSL2   | ENST00000311151 | p.D203N  | c.607     | 0.161880375 | 0     | 1 |
| 3702 CASQ1    | ENST00000368078 | p.D135H  | c.403     | 0.003077554 | 8.344 | 1 |
| 3702 CASQ1    | ENST00000368078 | p.D199E  | c.597     | 0.003077554 | 0     | 1 |
| 3703 PIP      | ENST00000291009 | p.T107N  | c.320     | 0.10330629  | 3.275 | 1 |
| 3703 PIP      | ENST00000291009 | p.V145I  | c.433     | 0.10330629  | 0     | 1 |
| 3704 FKBP8    | ENST00000453489 | p.E75Q   | c.223     | 0.235472519 | 0     | 1 |
| 3704 FKBP8    | ENST00000453489 | p.S143L  | c.428     | 0.155745409 | 2.811 | 1 |
| 3704 FKBP8    | ENST00000453489 | p.R145C  | c.433     | 0.10622461  | 3.427 | 1 |
| 3705 KYNU     | ENST00000264170 | p.K157N  | c.471     | 0.097463105 | 0     | 1 |
| 3705 KYNU     | ENST00000264170 | p.V217M  | c.649     | 0.097463105 | 3.359 | 1 |
| 3706 LIPF     | ENST00000394375 | p.P161S  | c.481     | 0.006510572 | 7.263 | 1 |
| 3706 LIPF     | ENST00000394375 | p.K169N  | c.507     | 0.010358795 | 6.593 | 1 |
| 3706 LIPF     | ENST00000394375 | p.R201I  | c.602     | 0.016869367 | 0     | 1 |
| 3707 HNRNPM   | ENST00000325495 | p.S225N  | c.674     | 0.020249078 | 5.626 | 1 |
| 3707 HNRNPM   | ENST00000325495 | p.G266D  | c.797     | 0.020249078 | 0     | 1 |
| 3708 ALOX12   | ENST00000251535 | p.R430S  | c.1288    | 0.08478777  | 0     | 1 |
| 3708 ALOX12   | ENST00000251535 | p.D282N  | c.844     | 0.08478777  | 3.56  | 1 |
| 3709 FCGR3A   | ENST00000367969 | p.A62S   | c.184     | 0.233355467 | 4.499 | 1 |
| 3709 FCGR3A   | ENST00000367969 | p.V63M   | c.187     | 1.145782944 | 4.904 | 1 |
| 3709 FCGR3A   | ENST00000367969 | p.V63A   | c.188     | 1.145782944 | 4.904 | 1 |
| 3709 FCGR3A   | ENST00000367969 | p.G85R   | c.253     | 2.114851052 | 0     | 1 |
| 3709 FCGR3A   | ENST00000367969 | p.G85E   | c.254     | 2.114851052 | 0     | 1 |
| 3709 FCGR3A   | ENST00000367969 | p.G85K   | c.254_253 | 2.114851052 | 0     | 1 |
| 3709 FCGR3A   | ENST00000367969 | p.D134G  | c.401     | 0.17298515  | 8.03  | 1 |
| 3710 RASA1    | ENST00000274376 | p.M802I  | c.2406    | 1.044625124 | 0     | 2 |
| 3710 RASA1    | ENST00000274376 | p.F915L  | c.2743    | 0.089250249 | 4.486 | 1 |
| 3711 NF2      | ENST00000432151 | p.R132C  | c.394     | 0.065880714 | 0     | 1 |
| 3712 RB1      | ENST00000267163 | p.E440K  | c.1318    | 0.082469244 | 3.6   | 1 |
| 3712 RB1      | ENST00000267163 | p.N290H  | c.868     | 0.082469244 | 0     | 1 |
| 3713 TKT      | ENST00000423516 | p.A412T  | c.1234    | 1.010724097 | 0     | 2 |
| 3713 TKT      | ENST00000423516 | p.Y571D  | c.1711    | 0.034632816 | 6.543 | 1 |

|              |                 |          |         |             |       |   |
|--------------|-----------------|----------|---------|-------------|-------|---|
| 3714 S1PR2   | ENST00000590320 | p.E50K   | c.148   | 0.140632311 | 0     | 1 |
| 3714 S1PR2   | ENST00000590320 | p.V286I  | c.856   | 0.140632311 | 2.83  | 1 |
| 3715 TP53BP2 | ENST00000343537 | p.R896C  | c.2686  | 0.013496966 | 0     | 1 |
| 3715 TP53BP2 | ENST00000343537 | p.R950I  | c.2849  | 0.011040354 | 7.594 | 1 |
| 3715 TP53BP2 | ENST00000343537 | p.H1003Y | c.3007  | 0.011663326 | 6.909 | 1 |
| 3716 UCHL3   | ENST00000377595 | p.P57R   | c.170   | 0.053548872 | 4.223 | 1 |
| 3716 UCHL3   | ENST00000377595 | p.D216N  | c.646   | 0.053548872 | 0     | 1 |
| 3717 CTNNA1  | ENST00000302763 | p.K627R  | c.1880  | 0.011589804 | 6.431 | 1 |
| 3717 CTNNA1  | ENST00000302763 | p.Y843C  | c.2528  | 0.011589804 | 0     | 1 |
| 3718 PDE10A  | ENST00000539869 | p.G480C  | c.1438  | 1.304775843 | 0     | 1 |
| 3718 PDE10A  | ENST00000539869 | p.G480V  | c.1439  | 1.304775843 | 0     | 1 |
| 3718 PDE10A  | ENST00000539869 | p.P683L  | c.2048  | 0.666731089 | 1.875 | 1 |
| 3718 PDE10A  | ENST00000539869 | p.G725C  | c.2173  | 0.094532158 | 6.873 | 1 |
| 3718 PDE10A  | ENST00000539869 | p.G728V  | c.2183  | 0.161905449 | 5.404 | 1 |
| 3719 TNKS    | ENST00000310430 | p.R1200Q | c.3599  | 0.134157536 | 0     | 1 |
| 3719 TNKS    | ENST00000310430 | p.A1271T | c.3811  | 0.134157536 | 2.898 | 1 |
| 3720 CSNK1D  | ENST00000398519 | p.G62R   | c.184   | 0.010187896 | 6.617 | 1 |
| 3720 CSNK1D  | ENST00000398519 | p.L144M  | c.430   | 0.010187896 | 0     | 1 |
| 3721 NTRK1   | ENST00000524377 | p.M375T  | c.1124  | 0.018594245 | 0     | 1 |
| 3721 NTRK1   | ENST00000524377 | p.N318S  | c.953   | 0.018594245 | 5.749 | 1 |
| 3722 ACTN2   | ENST00000542672 | p.R357H  | c.1070  | 0.009105791 | 6.779 | 1 |
| 3722 ACTN2   | ENST00000542672 | p.E278Q  | c.832   | 0.009105791 | 0     | 1 |
| 3723 MAPK14  | ENST00000229795 | p.R73W   | c.217   | 0.260670458 | 2.157 | 1 |
| 3723 MAPK14  | ENST00000229795 | p.A144T  | c.430   | 0.199003436 | 2.621 | 1 |
| 3723 MAPK14  | ENST00000229795 | p.D324A  | c.971   | 0.386777058 | 0     | 1 |
| 3724 NCAM2   | ENST00000400546 | p.S217Y  | c.650   | 0.102237757 | 0     | 1 |
| 3724 NCAM2   | ENST00000400546 | p.F295L  | c.885   | 0.102237757 | 3.29  | 1 |
| 3725 FOLH1   | ENST00000256999 | p.D596H  | c.1786  | 1.028596849 | 6.128 | 1 |
| 3725 FOLH1   | ENST00000256999 | p.D596N  | c.1786  | 1.028596849 | 6.128 | 1 |
| 3725 FOLH1   | ENST00000256999 | p.A601T  | c.1801  | 0.091632297 | 4.448 | 1 |
| 3725 FOLH1   | ENST00000256999 | p.A643S  | c.1927  | 1.092675142 | 0     | 2 |
| 3725 FOLH1   | ENST00000256999 | p.A743V  | c.2228  | 0.036524289 | 5.775 | 1 |
| 3726 HSPG2   | ENST00000374695 | p.F4211L | c.12633 | 0.103091694 | 0     | 1 |
| 3726 HSPG2   | ENST00000374695 | p.G4336E | c.13007 | 0.103091694 | 3.278 | 1 |
| 3727 EEA1    | ENST00000322349 | p.A1350T | c.4048  | 0.008893703 | 0     | 1 |
| 3727 EEA1    | ENST00000322349 | p.S1395F | c.4184  | 0.008893703 | 6.813 | 1 |
| 3728 KIR3DL1 | ENST00000541392 | p.M59V   | c.175   | 0.005711162 | 7.452 | 1 |
| 3728 KIR3DL1 | ENST00000541392 | p.P29L   | c.86    | 0.005711162 | 0     | 1 |
| 3729 PPP2R1A | ENST00000322088 | p.Q372L  | c.1115  | 0.066201146 | 0     | 1 |
| 3729 PPP2R1A | ENST00000322088 | p.P406R  | c.1217  | 0.066201146 | 3.917 | 1 |
| 3730 RAB5A   | ENST00000273047 | p.R81Q   | c.242   | 0.0417699   | 4.621 | 1 |
| 3730 RAB5A   | ENST00000273047 | p.N113K  | c.339   | 0.068472908 | 0     | 1 |
| 3730 RAB5A   | ENST00000273047 | p.Y151S  | c.452   | 0.028965298 | 5.167 | 1 |
| 3731 F5      | ENST00000367796 | p.L56I   | c.166   | 2.00993682  | 0     | 3 |
| 3731 F5      | ENST00000367796 | p.M231I  | c.693   | 0.029810461 | 6.653 | 1 |
| 3732 SMAD3   | ENST00000327367 | p.K341N  | c.1023  | 0.094339123 | 3.406 | 1 |
| 3732 SMAD3   | ENST00000327367 | p.C320Y  | c.959   | 0.094339123 | 0     | 1 |
| 3733 SELL    | ENST00000236147 | p.E131D  | c.393   | 0.142190849 | 2.874 | 1 |
| 3733 SELL    | ENST00000236147 | p.K135N  | c.405   | 0.04817675  | 4.56  | 1 |

|             |                 |          |         |             |       |   |
|-------------|-----------------|----------|---------|-------------|-------|---|
| 3733 SELL   | ENST00000236147 | p.D157N  | c.469   | 0.17880187  | 0     | 1 |
| 3734 VCP    | ENST00000358901 | p.R83W   | c.247   | 1.299086145 | 0     | 1 |
| 3734 VCP    | ENST00000358901 | p.R83Q   | c.248   | 1.299086145 | 0     | 1 |
| 3734 VCP    | ENST00000358901 | p.V28L   | c.82    | 0.049323054 | 5.529 | 1 |
| 3734 VCP    | ENST00000358901 | p.D29H   | c.85    | 0.278222636 | 2.964 | 1 |
| 3734 VCP    | ENST00000358901 | p.E30K   | c.88    | 0.320903853 | 2.744 | 1 |
| 3735 ADRB2  | ENST00000305988 | p.S111F  | c.332   | 0.007535923 | 0     | 1 |
| 3735 ADRB2  | ENST00000305988 | p.P168S  | c.502   | 0.007535923 | 7.052 | 1 |
| 3736 ERBB4  | ENST00000342788 | p.R114Q  | c.341   | 0.007089993 | 7.14  | 1 |
| 3736 ERBB4  | ENST00000342788 | p.P172R  | c.515   | 0.007089993 | 0     | 1 |
| 3737 MTOR   | ENST00000361445 | p.W2023G | c.6067  | 0.020674554 | 5.596 | 1 |
| 3737 MTOR   | ENST00000361445 | p.A2056V | c.6167  | 0.020674554 | 0     | 1 |
| 3738 SEMA4D | ENST00000438547 | p.V216M  | c.646   | 0.007345111 | 0     | 1 |
| 3738 SEMA4D | ENST00000438547 | p.P307S  | c.919   | 0.007345111 | 7.089 | 1 |
| 3739 NRP1   | ENST00000374867 | p.A293V  | c.878   | 0.108442336 | 0     | 1 |
| 3739 NRP1   | ENST00000374867 | p.W325R  | c.973   | 0.108442336 | 3.205 | 1 |
| 3740 PITRM1 | ENST00000380989 | p.H259Y  | c.775   | 0.010510681 | 6.572 | 1 |
| 3740 PITRM1 | ENST00000380989 | p.K287R  | c.860   | 0.010510681 | 0     | 1 |
| 3741 USO1   | ENST00000538159 | p.V279E  | c.836   | 0.078890752 | 3.664 | 1 |
| 3741 USO1   | ENST00000538159 | p.I331T  | c.992   | 0.078890752 | 0     | 1 |
| 3742 MCAT   | ENST00000290429 | p.R272H  | c.815   | 0.06506385  | 3.942 | 1 |
| 3742 MCAT   | ENST00000290429 | p.V321A  | c.962   | 0.06506385  | 0     | 1 |
| 3743 MGAM   | ENST00000475668 | p.R340C  | c.1018  | 0.033889919 | 4.883 | 1 |
| 3743 MGAM   | ENST00000475668 | p.P556S  | c.1666  | 0.043669579 | 0     | 1 |
| 3743 MGAM   | ENST00000475668 | p.N325D  | c.973   | 0.00977966  | 6.676 | 1 |
| 3744 ABCB10 | ENST00000344517 | p.Q489H  | c.1467  | 0.150514124 | 6.554 | 1 |
| 3744 ABCB10 | ENST00000344517 | p.P518L  | c.1553  | 1.012017977 | 0     | 1 |
| 3744 ABCB10 | ENST00000344517 | p.P518Q  | c.1553  | 1.012017977 | 0     | 1 |
| 3744 ABCB10 | ENST00000344517 | p.D554H  | c.1660  | 0.131979514 | 9.506 | 1 |
| 3745 ITGB3  | ENST00000559488 | p.E382G  | c.1145  | 0.351791028 | 0     | 1 |
| 3745 ITGB3  | ENST00000559488 | p.K410E  | c.1228  | 0.17805996  | 2.925 | 1 |
| 3745 ITGB3  | ENST00000559488 | p.S411Y  | c.1232  | 0.246464794 | 2.199 | 1 |
| 3745 ITGB3  | ENST00000559488 | p.R589C  | c.1765  | 0.020045935 | 8.744 | 1 |
| 3746 HAGH   | ENST00000397356 | p.L64V   | c.190   | 0.091441951 | 3.451 | 1 |
| 3746 HAGH   | ENST00000397356 | p.T97P   | c.289   | 0.091441951 | 0     | 1 |
| 3747 DDB1   | ENST00000301764 | p.S1046R | c.3138  | 0.045405158 | 0     | 1 |
| 3747 DDB1   | ENST00000301764 | p.D1115N | c.3343  | 0.045405158 | 4.461 | 1 |
| 3748 VCAM1  | ENST00000294728 | p.S54F   | c.161   | 0.019103754 | 5.71  | 1 |
| 3748 VCAM1  | ENST00000294728 | p.T76A   | c.226   | 0.029621724 | 0     | 1 |
| 3748 VCAM1  | ENST00000294728 | p.E28Q   | c.82    | 0.010517969 | 6.571 | 1 |
| 3749 MYOF   | ENST00000371501 | p.W973R  | c.2917  | 0.179244406 | 2.48  | 1 |
| 3749 MYOF   | ENST00000371501 | p.K1029T | c.3086  | 0.179244406 | 0     | 1 |
| 3750 ROCK2  | ENST00000315872 | p.G412A  | c.1235  | 0.117921204 | 0     | 1 |
| 3750 ROCK2  | ENST00000315872 | p.V43E   | c.128   | 0.004166351 | 7.907 | 1 |
| 3750 ROCK2  | ENST00000315872 | p.D48G   | c.143   | 0.113754853 | 3.136 | 1 |
| 3751 HERC2  | ENST00000261609 | p.E4057K | c.12169 | 0.015261071 | 0     | 1 |
| 3751 HERC2  | ENST00000261609 | p.R4089K | c.12266 | 0.015261071 | 6.034 | 1 |
| 3752 EHMT1  | ENST00000460843 | p.V1063A | c.3188  | 0.010294375 | 6.602 | 1 |
| 3752 EHMT1  | ENST00000460843 | p.S1069C | c.3206  | 0.009718841 | 6.685 | 1 |

|                |                 |          |        |             |       |   |
|----------------|-----------------|----------|--------|-------------|-------|---|
| 3752 EHMT1     | ENST00000460843 | p.D1178N | c.3532 | 0.020013216 | 0     | 1 |
| 3753 AK5       | ENST00000354567 | p.G474R  | c.1420 | 0.003652247 | 8.097 | 1 |
| 3753 AK5       | ENST00000354567 | p.R475H  | c.1424 | 0.034125642 | 4.873 | 1 |
| 3753 AK5       | ENST00000354567 | p.L497F  | c.1489 | 0.037777889 | 0     | 1 |
| 3754 EPHA2     | ENST00000358432 | p.W912C  | c.2736 | 0.047136877 | 4.407 | 1 |
| 3754 EPHA2     | ENST00000358432 | p.R957C  | c.2869 | 0.047136877 | 0     | 1 |
| 3755 PREP      | ENST00000369110 | p.R260Q  | c.779  | 0.014229216 | 0     | 1 |
| 3755 PREP      | ENST00000369110 | p.K281Q  | c.841  | 0.014229216 | 6.135 | 1 |
| 3756 PYGM      | ENST00000164139 | p.D565N  | c.1693 | 1.130398574 | 0     | 2 |
| 3756 PYGM      | ENST00000164139 | p.R602Q  | c.1805 | 0.260797148 | 2.939 | 1 |
| 3757 P4HB      | ENST00000331483 | p.F104L  | c.312  | 0.081333866 | 3.62  | 1 |
| 3757 P4HB      | ENST00000331483 | p.R132H  | c.395  | 0.081333866 | 0     | 1 |
| 3758 PCTP      | ENST00000573500 | p.R112G  | c.334  | 0.094125181 | 0     | 1 |
| 3758 PCTP      | ENST00000573500 | p.V149G  | c.446  | 0.070062528 | 3.872 | 1 |
| 3758 PCTP      | ENST00000573500 | p.R151L  | c.452  | 0.027590491 | 5.275 | 1 |
| 3759 FOLH1     | ENST00000256999 | p.K479E  | c.1435 | 0.023633875 | 0     | 1 |
| 3759 FOLH1     | ENST00000256999 | p.M509I  | c.1527 | 0.023633875 | 5.403 | 1 |
| 3760 KAT2A     | ENST00000225916 | p.G505S  | c.1513 | 0.036246864 | 4.786 | 1 |
| 3760 KAT2A     | ENST00000225916 | p.V543I  | c.1627 | 0.036246864 | 0     | 1 |
| 3761 GCDH      | ENST00000591470 | p.Y197C  | c.590  | 0.129228842 | 0     | 1 |
| 3761 GCDH      | ENST00000591470 | p.E273Q  | c.817  | 0.129228842 | 2.952 | 1 |
| 3762 BCAT1     | ENST00000539282 | p.R175C  | c.523  | 2.012958118 | 0     | 3 |
| 3762 BCAT1     | ENST00000539282 | p.K234N  | c.702  | 0.038874354 | 6.27  | 1 |
| 3763 CYP2C8    | ENST00000371270 | p.L36F   | c.106  | 0.027969533 | 5.16  | 1 |
| 3763 CYP2C8    | ENST00000371270 | p.G70D   | c.209  | 0.027969533 | 0     | 1 |
| 3764 DNAJC3    | ENST00000602402 | p.Y395C  | c.1184 | 0.080214119 | 0     | 1 |
| 3764 DNAJC3    | ENST00000602402 | p.A445V  | c.1334 | 0.080214119 | 3.64  | 1 |
| 3765 RXRG      | ENST00000359842 | p.P379Q  | c.1136 | 0.040803697 | 0     | 1 |
| 3765 RXRG      | ENST00000359842 | p.R422H  | c.1265 | 0.035378091 | 4.821 | 1 |
| 3765 RXRG      | ENST00000359842 | p.R427H  | c.1280 | 0.005425606 | 7.526 | 1 |
| 3766 TXNDC5    | ENST00000379757 | p.A372T  | c.1114 | 1.024535254 | 0     | 1 |
| 3766 TXNDC5    | ENST00000379757 | p.A372V  | c.1115 | 1.024535254 | 0     | 1 |
| 3766 TXNDC5    | ENST00000379757 | p.A301E  | c.902  | 0.049070507 | 5.349 | 1 |
| 3768 RALA      | ENST00000005257 | p.R84Q   | c.251  | 0.009188213 | 0     | 1 |
| 3768 RALA      | ENST00000005257 | p.E116D  | c.348  | 0.009188213 | 6.766 | 1 |
| 3769 CFHR2     | ENST00000367421 | p.Q183K  | c.547  | 0.014874655 | 6.071 | 1 |
| 3769 CFHR2     | ENST00000367421 | p.P206T  | c.616  | 0.056888248 | 0     | 1 |
| 3769 CFHR2     | ENST00000367421 | p.Y230S  | c.689  | 0.042013594 | 4.573 | 1 |
| 3770 PTPRG     | ENST00000474889 | p.R937S  | c.2811 | 0.06673756  | 5.307 | 1 |
| 3770 PTPRG     | ENST00000474889 | p.N975D  | c.2923 | 0.139965012 | 0     | 1 |
| 3770 PTPRG     | ENST00000474889 | p.N998S  | c.2993 | 0.117602436 | 3.124 | 1 |
| 3771 THBS1     | ENST00000260356 | p.A64T   | c.190  | 0.1396558   | 0     | 1 |
| 3771 THBS1     | ENST00000260356 | p.I199F  | c.595  | 0.062195142 | 4.121 | 1 |
| 3771 THBS1     | ENST00000260356 | p.N207S  | c.620  | 0.086907187 | 3.605 | 1 |
| 3772 PANK3     | ENST00000239231 | p.E233D  | c.699  | 0.013424387 | 6.219 | 1 |
| 3772 PANK3     | ENST00000239231 | p.V326A  | c.977  | 0.013424387 | 0     | 1 |
| 3774 TNFRSF11B | ENST00000297350 | p.R111C  | c.331  | 0.005609158 | 0     | 1 |
| 3774 TNFRSF11B | ENST00000297350 | p.S156Y  | c.467  | 0.005609158 | 7.478 | 1 |
| 3775 MTR       | ENST00000366577 | p.A1050T | c.3148 | 0.02110897  | 6.566 | 1 |

|               |                 |          |        |             |       |   |
|---------------|-----------------|----------|--------|-------------|-------|---|
| 3775 MTR      | ENST00000366577 | p.R1094C | c.3280 | 1.010554485 | 0     | 1 |
| 3775 MTR      | ENST00000366577 | p.R1094H | c.3281 | 1.010554485 | 0     | 1 |
| 3776 CNN1     | ENST00000252456 | p.Q121R  | c.362  | 0.170873431 | 0     | 1 |
| 3776 CNN1     | ENST00000252456 | p.E31K   | c.91   | 0.170873431 | 2.549 | 1 |
| 3777 KIF3B    | ENST00000375712 | p.G90E   | c.269  | 0.020531744 | 0     | 1 |
| 3777 KIF3B    | ENST00000375712 | p.S304C  | c.911  | 0.020531744 | 5.606 | 1 |
| 3778 REM2     | ENST00000267396 | p.Q110R  | c.329  | 0.054933488 | 4.435 | 1 |
| 3778 REM2     | ENST00000267396 | p.R181P  | c.542  | 0.234473707 | 0     | 1 |
| 3778 REM2     | ENST00000267396 | p.R212W  | c.634  | 0.070463495 | 4.059 | 1 |
| 3778 REM2     | ENST00000267396 | p.A215T  | c.643  | 0.141870519 | 2.963 | 1 |
| 3779 PTPRO    | ENST00000281171 | p.L914R  | c.2741 | 0.071644512 | 4.803 | 1 |
| 3779 PTPRO    | ENST00000281171 | p.H1159Y | c.3475 | 1.035822256 | 0     | 1 |
| 3779 PTPRO    | ENST00000281171 | p.H1159P | c.3476 | 1.035822256 | 0     | 1 |
| 3780 ACVR2B   | ENST00000352511 | p.R383H  | c.1148 | 0.006447699 | 7.277 | 1 |
| 3780 ACVR2B   | ENST00000352511 | p.M386I  | c.1158 | 0.076415017 | 3.71  | 1 |
| 3780 ACVR2B   | ENST00000352511 | p.S470F  | c.1409 | 0.082862716 | 0     | 1 |
| 3781 CTNND1   | ENST00000428599 | p.S669N  | c.2006 | 1.060454771 | 0     | 1 |
| 3781 CTNND1   | ENST00000428599 | p.S669T  | c.2006 | 1.060454771 | 0     | 1 |
| 3781 CTNND1   | ENST00000428599 | p.T714A  | c.2140 | 0.120909541 | 4.048 | 1 |
| 3782 FES      | ENST00000328850 | p.A788V  | c.2363 | 0.05855759  | 0     | 1 |
| 3782 FES      | ENST00000328850 | p.E813D  | c.2439 | 0.05855759  | 4.094 | 1 |
| 3783 IPO13    | ENST00000372343 | p.F768I  | c.2302 | 0.063109456 | 3.986 | 1 |
| 3783 IPO13    | ENST00000372343 | p.L797M  | c.2389 | 0.063109456 | 0     | 1 |
| 3784 GRM1     | ENST00000282753 | p.R275C  | c.823  | 1.018376426 | 0     | 1 |
| 3784 GRM1     | ENST00000282753 | p.R275H  | c.824  | 1.018376426 | 0     | 1 |
| 3784 GRM1     | ENST00000282753 | p.L306I  | c.916  | 0.036752852 | 5.766 | 1 |
| 3785 EPHA4    | ENST00000281821 | p.F136L  | c.408  | 0.008275143 | 6.917 | 1 |
| 3785 EPHA4    | ENST00000281821 | p.R198H  | c.593  | 0.008275143 | 0     | 1 |
| 3786 SERPINB1 | ENST00000380739 | p.R363W  | c.1087 | 0.082526428 | 3.599 | 1 |
| 3786 SERPINB1 | ENST00000380739 | p.V229I  | c.685  | 0.082526428 | 0     | 1 |
| 3787 CXCL1    | ENST00000395761 | p.T39A   | c.115  | 0.181494785 | 2.462 | 1 |
| 3787 CXCL1    | ENST00000395761 | p.C69Y   | c.206  | 0.181494785 | 0     | 1 |
| 3788 ITK      | ENST00000422843 | p.V409L  | c.1225 | 0.019966639 | 9.443 | 1 |
| 3788 ITK      | ENST00000422843 | p.M410I  | c.1230 | 0.121190122 | 0     | 1 |
| 3788 ITK      | ENST00000422843 | p.S499F  | c.1496 | 0.045491327 | 4.566 | 1 |
| 3788 ITK      | ENST00000422843 | p.M503V  | c.1507 | 0.099338757 | 3.689 | 1 |
| 3789 AZGP1    | ENST00000292401 | p.S208F  | c.623  | 0.090370768 | 3.468 | 1 |
| 3789 AZGP1    | ENST00000292401 | p.V292L  | c.874  | 0.090370768 | 0     | 1 |
| 3790 SNRPG    | ENST00000449935 | p.I50V   | c.148  | 0.045499673 | 4.458 | 1 |
| 3790 SNRPG    | ENST00000449935 | p.V29M   | c.85   | 0.045499673 | 0     | 1 |
| 3791 PRDX6    | ENST00000340385 | p.S38F   | c.113  | 0.017086492 | 5.871 | 1 |
| 3791 PRDX6    | ENST00000340385 | p.R132C  | c.394  | 0.017086492 | 0     | 1 |
| 3792 SERPINC1 | ENST00000367698 | p.A415D  | c.1244 | 0.009024108 | 6.792 | 1 |
| 3792 SERPINC1 | ENST00000367698 | p.G228V  | c.683  | 0.009024108 | 0     | 1 |
| 3793 ANPEP    | ENST00000300060 | p.D406N  | c.1216 | 0.011957006 | 0     | 1 |
| 3793 ANPEP    | ENST00000300060 | p.L545M  | c.1633 | 0.011957006 | 6.386 | 1 |
| 3794 SERPINA7 | ENST00000327674 | p.L346H  | c.1037 | 0.154700717 | 0     | 1 |
| 3794 SERPINA7 | ENST00000327674 | p.V370F  | c.1108 | 0.082929441 | 3.7   | 1 |
| 3794 SERPINA7 | ENST00000327674 | p.L372R  | c.1115 | 0.053859894 | 4.36  | 1 |

|               |                 |          |        |             |       |   |
|---------------|-----------------|----------|--------|-------------|-------|---|
| 3794 SERPINA7 | ENST00000327674 | p.S373L  | c.1118 | 0.032707176 | 5.105 | 1 |
| 3795 STK4     | ENST00000372806 | p.F257V  | c.769  | 0.089126607 | 3.488 | 1 |
| 3795 STK4     | ENST00000372806 | p.V281I  | c.841  | 0.089126607 | 0     | 1 |
| 3796 ACP5     | ENST00000412435 | p.F42L   | c.124  | 0.076256282 | 0     | 1 |
| 3796 ACP5     | ENST00000412435 | p.R85T   | c.254  | 0.076256282 | 3.713 | 1 |
| 3797 IL16     | ENST00000302987 | p.P533Q  | c.1598 | 0.207178155 | 2.4   | 1 |
| 3797 IL16     | ENST00000302987 | p.P577L  | c.1730 | 0.111206444 | 3.419 | 1 |
| 3797 IL16     | ENST00000302987 | p.K613N  | c.1839 | 0.282957431 | 0     | 1 |
| 3798 MGAM     | ENST00000475668 | p.S708F  | c.2123 | 0.082755557 | 4.595 | 1 |
| 3798 MGAM     | ENST00000475668 | p.G808R  | c.2422 | 1.041377778 | 0     | 1 |
| 3798 MGAM     | ENST00000475668 | p.G808V  | c.2423 | 1.041377778 | 0     | 1 |
| 3800 CCL7     | ENST00000200307 | p.F48I   | c.142  | 0.393027434 | 0     | 1 |
| 3800 CCL7     | ENST00000200307 | p.A86T   | c.256  | 0.209581782 | 2.543 | 1 |
| 3800 CCL7     | ENST00000200307 | p.D87Y   | c.259  | 0.259438107 | 2.175 | 1 |
| 3801 KCNU1    | ENST00000399881 | p.R713W  | c.2137 | 2.011148551 | 0     | 3 |
| 3801 KCNU1    | ENST00000399881 | p.K749N  | c.2247 | 0.033445652 | 6.487 | 1 |
| 3802 ANXA4    | ENST00000394295 | p.M101I  | c.303  | 0.016345077 | 5.935 | 1 |
| 3802 ANXA4    | ENST00000394295 | p.R143C  | c.427  | 0.016345077 | 0     | 1 |
| 3804 NCBP1    | ENST00000375147 | p.E378K  | c.1132 | 0.139274206 | 0     | 1 |
| 3804 NCBP1    | ENST00000375147 | p.R329T  | c.986  | 0.139274206 | 2.844 | 1 |
| 3805 EPRS     | ENST00000366923 | p.T1224I | c.3671 | 0.022655419 | 0     | 1 |
| 3805 EPRS     | ENST00000366923 | p.F1483L | c.4449 | 0.022655419 | 5.464 | 1 |
| 3806 CCNT2    | ENST00000264157 | p.I62V   | c.184  | 0.003192716 | 8.291 | 1 |
| 3806 CCNT2    | ENST00000264157 | p.F77L   | c.231  | 0.005875796 | 7.411 | 1 |
| 3806 CCNT2    | ENST00000264157 | p.M139L  | c.415  | 0.009068512 | 0     | 1 |
| 3807 ST14     | ENST00000278742 | p.A394T  | c.1180 | 0.094077922 | 3.41  | 1 |
| 3807 ST14     | ENST00000278742 | p.D437N  | c.1309 | 0.094077922 | 0     | 1 |
| 3808 APC      | ENST00000457016 | p.W593L  | c.1778 | 0.023003545 | 5.442 | 1 |
| 3808 APC      | ENST00000457016 | p.R640W  | c.1918 | 0.023003545 | 0     | 1 |
| 3809 SUPT5H   | ENST00000432763 | p.R190Q  | c.569  | 0.02261366  | 5.537 | 1 |
| 3809 SUPT5H   | ENST00000432763 | p.T192S  | c.574  | 0.051038944 | 4.323 | 1 |
| 3809 SUPT5H   | ENST00000432763 | p.I225M  | c.675  | 0.071500445 | 0     | 1 |
| 3810 TEK      | ENST00000380036 | p.I45T   | c.134  | 0.024723041 | 5.338 | 1 |
| 3810 TEK      | ENST00000380036 | p.D77E   | c.231  | 0.024723041 | 0     | 1 |
| 3811 MAP2K6   | ENST00000590474 | p.R83Q   | c.248  | 1.020210995 | 9.696 | 2 |
| 3811 MAP2K6   | ENST00000590474 | p.R85P   | c.254  | 1.070144128 | 0     | 1 |
| 3811 MAP2K6   | ENST00000590474 | p.R85Q   | c.254  | 1.070144128 | 0     | 1 |
| 3811 MAP2K6   | ENST00000590474 | p.G123C  | c.367  | 0.171065226 | 3.884 | 1 |
| 3812 PDCD10   | ENST00000392750 | p.R82C   | c.244  | 0.124913387 | 3.001 | 1 |
| 3812 PDCD10   | ENST00000392750 | p.S115C  | c.343  | 0.124913387 | 0     | 1 |
| 3813 ACTR8    | ENST00000335754 | p.H352R  | c.1055 | 0.036676506 | 4.769 | 1 |
| 3813 ACTR8    | ENST00000335754 | p.R128H  | c.383  | 0.036676506 | 0     | 1 |
| 3814 TCEB3    | ENST00000418390 | p.C610R  | c.1828 | 0.006438766 | 7.279 | 1 |
| 3814 TCEB3    | ENST00000418390 | p.R617H  | c.1850 | 0.005558842 | 7.491 | 1 |
| 3814 TCEB3    | ENST00000418390 | p.Y656C  | c.1967 | 0.011997608 | 0     | 1 |
| 3815 GSTA2    | ENST00000493422 | p.A100V  | c.299  | 0.027421104 | 0     | 1 |
| 3815 GSTA2    | ENST00000493422 | p.H159Q  | c.477  | 0.018895451 | 6.492 | 1 |
| 3815 GSTA2    | ENST00000493422 | p.L163F  | c.487  | 0.023595393 | 5.938 | 1 |
| 3816 CTRC     | ENST00000375949 | p.V86M   | c.256  | 0.103808753 | 0     | 1 |



|      |         |                 |         |        |             |       |   |
|------|---------|-----------------|---------|--------|-------------|-------|---|
| 3816 | CTRC    | ENST00000375949 | p.G167D | c.500  | 0.103808753 | 3.268 | 1 |
| 3817 | ANPEP   | ENST00000300060 | p.G559W | c.1675 | 0.030649344 | 5.028 | 1 |
| 3817 | ANPEP   | ENST00000300060 | p.D610N | c.1828 | 0.030649344 | 0     | 1 |
| 3818 | APAF1   | ENST0000051964  | p.E417K | c.1249 | 0.028497911 | 6.133 | 1 |
| 3818 | APAF1   | ENST0000051964  | p.D266Y | c.796  | 1.014248956 | 0     | 2 |
| 3819 | ADH1B   | ENST00000305046 | p.A4T   | c.10   | 0.123585576 | 3.274 | 1 |
| 3819 | ADH1B   | ENST00000305046 | p.G5E   | c.14   | 0.029710771 | 5.424 | 1 |
| 3819 | ADH1B   | ENST00000305046 | p.E75D  | c.225  | 0.298851527 | 0     | 1 |
| 3819 | ADH1B   | ENST00000305046 | p.T3I   | c.8    | 0.193991502 | 2.538 | 1 |
| 3820 | ACO1    | ENST00000379923 | p.K387R | c.1160 | 0.015303442 | 0     | 1 |
| 3820 | ACO1    | ENST00000379923 | p.D569N | c.1705 | 0.015303442 | 6.03  | 1 |
| 3821 | ESYT2   | ENST00000251527 | p.W178C | c.534  | 0.065108964 | 0     | 1 |
| 3821 | ESYT2   | ENST00000251527 | p.V214M | c.640  | 0.065108964 | 3.941 | 1 |
| 3822 | EPB41L3 | ENST00000342933 | p.L145V | c.433  | 0.025016088 | 5.321 | 1 |
| 3822 | EPB41L3 | ENST00000342933 | p.E198D | c.594  | 0.025016088 | 0     | 1 |
| 3823 | PUF60   | ENST00000526683 | p.N468K | c.1404 | 0.290175979 | 2.785 | 1 |
| 3823 | PUF60   | ENST00000526683 | p.R540C | c.1618 | 1.145087989 | 0     | 1 |
| 3823 | PUF60   | ENST00000526683 | p.R540H | c.1619 | 1.145087989 | 0     | 1 |
| 3824 | A2M     | ENST00000318602 | p.R732Q | c.2195 | 2.100437553 | 0     | 3 |
| 3824 | A2M     | ENST00000318602 | p.P759T | c.2275 | 1.139665479 | 4.492 | 1 |
| 3824 | A2M     | ENST00000318602 | p.P759H | c.2276 | 1.139665479 | 4.492 | 1 |
| 3824 | A2M     | ENST00000318602 | p.D897H | c.2689 | 0.047364588 | 6.435 | 1 |
| 3825 | TIGIT   | ENST00000481065 | p.E95K  | c.283  | 0.018010724 | 5.795 | 1 |
| 3825 | TIGIT   | ENST00000481065 | p.P156L | c.467  | 0.018010724 | 0     | 1 |
| 3826 | MAP3K7  | ENST00000369329 | p.S478R | c.1434 | 0.070267433 | 3.831 | 1 |
| 3826 | MAP3K7  | ENST00000369329 | p.R226Q | c.677  | 0.070267433 | 0     | 1 |
| 3827 | DARS2   | ENST00000361951 | p.E385K | c.1153 | 0.026314467 | 0     | 1 |
| 3827 | DARS2   | ENST00000361951 | p.L169V | c.505  | 0.026314467 | 5.248 | 1 |
| 3828 | ACVR1   | ENST00000409283 | p.D185G | c.554  | 0.043194756 | 4.533 | 1 |
| 3828 | ACVR1   | ENST00000409283 | p.S190L | c.569  | 0.009213723 | 6.762 | 1 |
| 3828 | ACVR1   | ENST00000409283 | p.R258M | c.773  | 0.05240848  | 0     | 1 |
| 3829 | CAND1   | ENST00000545606 | p.N610T | c.1829 | 0.008217983 | 0     | 1 |
| 3829 | CAND1   | ENST00000545606 | p.P646L | c.1937 | 0.008217983 | 6.927 | 1 |
| 3830 | NOVA1   | ENST00000539517 | p.R146C | c.436  | 0.102379587 | 0     | 1 |
| 3830 | NOVA1   | ENST00000539517 | p.A196V | c.587  | 0.102379587 | 3.288 | 1 |
| 3831 | BECN1   | ENST00000361523 | p.G334R | c.1000 | 0.051438772 | 4.281 | 1 |
| 3831 | BECN1   | ENST00000361523 | p.Q309H | c.927  | 0.051438772 | 0     | 1 |
| 3832 | EPHA3   | ENST00000336596 | p.S803L | c.2408 | 0.065199287 | 0     | 1 |
| 3832 | EPHA3   | ENST00000336596 | p.F871V | c.2611 | 0.065199287 | 3.939 | 1 |
| 3833 | SULT1B1 | ENST00000310613 | p.P47T  | c.139  | 0.123846898 | 5.852 | 1 |
| 3833 | SULT1B1 | ENST00000310613 | p.R131H | c.392  | 0.249598524 | 3.172 | 1 |
| 3833 | SULT1B1 | ENST00000310613 | p.A133V | c.398  | 0.155098208 | 3.483 | 1 |
| 3833 | SULT1B1 | ENST00000310613 | p.Y140F | c.419  | 0.09563041  | 9.278 | 1 |
| 3833 | SULT1B1 | ENST00000310613 | p.W173S | c.518  | 0.307076554 | 0     | 1 |
| 3833 | SULT1B1 | ENST00000310613 | p.G260W | c.778  | 0.03788652  | 8.153 | 1 |
| 3833 | SULT1B1 | ENST00000310613 | p.F269L | c.807  | 0.027272325 | 8.803 | 1 |
| 3833 | SULT1B1 | ENST00000310613 | p.F292L | c.876  | 0.200854663 | 3.608 | 1 |
| 3834 | PACSIN2 | ENST00000263246 | p.A155T | c.463  | 0.045594386 | 0     | 1 |
| 3834 | PACSIN2 | ENST00000263246 | p.K207N | c.621  | 0.045594386 | 4.455 | 1 |

|             |                 |          |        |             |       |   |
|-------------|-----------------|----------|--------|-------------|-------|---|
| 3835 NCAM2  | ENST00000400546 | p.S608R  | c.1822 | 0.025377633 | 5.566 | 1 |
| 3835 NCAM2  | ENST00000400546 | p.R631K  | c.1892 | 0.215903065 | 2.306 | 1 |
| 3835 NCAM2  | ENST00000400546 | p.D634N  | c.1900 | 0.035297292 | 5.09  | 1 |
| 3835 NCAM2  | ENST00000400546 | p.L640V  | c.1918 | 0.020670274 | 5.862 | 1 |
| 3835 NCAM2  | ENST00000400546 | p.Y662C  | c.1985 | 0.269882809 | 0     | 1 |
| 3836 ASB9   | ENST00000380488 | p.D220N  | c.658  | 0.017348812 | 7.293 | 1 |
| 3836 ASB9   | ENST00000380488 | p.S257P  | c.769  | 0.017181502 | 5.863 | 1 |
| 3836 ASB9   | ENST00000380488 | p.F290L  | c.868  | 0.023558089 | 0     | 1 |
| 3837 CSF1R  | ENST00000286301 | p.A123T  | c.367  | 0.030926771 | 0     | 1 |
| 3837 CSF1R  | ENST00000286301 | p.H165Y  | c.493  | 0.030926771 | 5.015 | 1 |
| 3838 DPYSL5 | ENST00000288699 | p.D64E   | c.192  | 0.015851921 | 6.109 | 1 |
| 3838 DPYSL5 | ENST00000288699 | p.H131Y  | c.391  | 0.108631131 | 0     | 1 |
| 3838 DPYSL5 | ENST00000288699 | p.R189C  | c.565  | 0.095507098 | 3.409 | 1 |
| 3839 GPD1   | ENST00000301149 | p.K169N  | c.507  | 0.0353046   | 0     | 1 |
| 3839 GPD1   | ENST00000301149 | p.D195N  | c.583  | 0.0353046   | 4.824 | 1 |
| 3840 PTPRN2 | ENST00000404321 | p.D831N  | c.2491 | 0.131132036 | 2.955 | 1 |
| 3840 PTPRN2 | ENST00000404321 | p.R950S  | c.2848 | 0.019011219 | 5.892 | 1 |
| 3840 PTPRN2 | ENST00000404321 | p.M983T  | c.2948 | 0.145799978 | 0     | 1 |
| 3841 PDE10A | ENST00000539869 | p.E258K  | c.772  | 0.073454771 | 3.767 | 1 |
| 3841 PDE10A | ENST00000539869 | p.Y287C  | c.860  | 0.073454771 | 0     | 1 |
| 3842 UBE2D2 | ENST00000398733 | p.Q46E   | c.136  | 0.008680537 | 0     | 1 |
| 3842 UBE2D2 | ENST00000398733 | p.A138V  | c.413  | 0.008680537 | 6.848 | 1 |
| 3843 MTERF  | ENST00000351870 | p.R134H  | c.401  | 0.203188088 | 5.482 | 1 |
| 3843 MTERF  | ENST00000351870 | p.F167L  | c.499  | 1.025919508 | 0     | 2 |
| 3843 MTERF  | ENST00000351870 | p.R169W  | c.505  | 0.165529059 | 8.14  | 1 |
| 3844 FKBP5  | ENST00000536438 | p.P47T   | c.139  | 0.098609413 | 0     | 1 |
| 3844 FKBP5  | ENST00000536438 | p.A95V   | c.284  | 0.071747318 | 3.842 | 1 |
| 3844 FKBP5  | ENST00000536438 | p.K98R   | c.293  | 0.030889315 | 5.114 | 1 |
| 3845 TLR4   | ENST00000355622 | p.N282S  | c.845  | 0.018262145 | 0     | 1 |
| 3845 TLR4   | ENST00000355622 | p.C306R  | c.916  | 0.018262145 | 5.775 | 1 |
| 3846 C3     | ENST00000245907 | p.S1008L | c.3023 | 0.138346069 | 0     | 1 |
| 3846 C3     | ENST00000245907 | p.E1433G | c.4298 | 0.060073001 | 4.172 | 1 |
| 3846 C3     | ENST00000245907 | p.Y1447H | c.4339 | 0.087467652 | 3.593 | 1 |
| 3847 ITGAV  | ENST00000261023 | p.D249G  | c.746  | 0.033169475 | 0     | 1 |
| 3847 ITGAV  | ENST00000261023 | p.A276T  | c.826  | 0.033169475 | 4.914 | 1 |
| 3848 DDC    | ENST00000444124 | p.P81S   | c.241  | 0.060082357 | 6.629 | 1 |
| 3848 DDC    | ENST00000444124 | p.L122R  | c.365  | 0.060580614 | 4.045 | 1 |
| 3848 DDC    | ENST00000444124 | p.P301S  | c.901  | 0.070684121 | 0     | 1 |
| 3849 PIK3CG | ENST00000496166 | p.D378N  | c.1132 | 0.0261327   | 5.258 | 1 |
| 3849 PIK3CG | ENST00000496166 | p.L379I  | c.1135 | 0.012430258 | 6.33  | 1 |
| 3849 PIK3CG | ENST00000496166 | p.R397K  | c.1190 | 0.032084048 | 4.962 | 1 |
| 3849 PIK3CG | ENST00000496166 | p.K457T  | c.1370 | 0.070647006 | 0     | 1 |
| 3850 PTPRC  | ENST00000442510 | p.D827N  | c.2479 | 0.006702895 | 0     | 1 |
| 3850 PTPRC  | ENST00000442510 | p.A1203S | c.3607 | 0.006702895 | 7.221 | 1 |
| 3851 SMAD3  | ENST00000327367 | p.P393T  | c.1177 | 1.034101996 | 0     | 1 |
| 3851 SMAD3  | ENST00000327367 | p.P393L  | c.1178 | 1.034101996 | 0     | 1 |
| 3851 SMAD3  | ENST00000327367 | p.Y237C  | c.710  | 0.068203992 | 4.874 | 1 |
| 3852 FLNB   | ENST00000490882 | p.S1854C | c.5560 | 0.138312169 | 2.854 | 1 |
| 3852 FLNB   | ENST00000490882 | p.P1931H | c.5792 | 0.138312169 | 0     | 1 |

|      |          |                 |          |        |             |       |   |
|------|----------|-----------------|----------|--------|-------------|-------|---|
| 3854 | DYRK2    | ENST00000344096 | p.R274Q  | c.821  | 0.048799156 | 0     | 1 |
| 3854 | DYRK2    | ENST00000344096 | p.M299I  | c.897  | 0.048799156 | 4.357 | 1 |
| 3855 | EYA2     | ENST00000327619 | p.F350L  | c.1050 | 0.114253812 | 3.155 | 1 |
| 3855 | EYA2     | ENST00000327619 | p.R383C  | c.1147 | 0.129967857 | 0     | 1 |
| 3855 | EYA2     | ENST00000327619 | p.L320P  | c.959  | 0.019688576 | 5.82  | 1 |
| 3856 | CYP1A2   | ENST00000343932 | p.L51V   | c.151  | 0.030564484 | 5.032 | 1 |
| 3856 | CYP1A2   | ENST00000343932 | p.R79C   | c.235  | 0.030564484 | 0     | 1 |
| 3857 | RFX5     | ENST00000452671 | p.R35P   | c.104  | 0.249653667 | 0     | 1 |
| 3857 | RFX5     | ENST00000452671 | p.L64I   | c.190  | 0.249653667 | 2.002 | 1 |
| 3858 | ADAM22   | ENST00000315984 | p.I378T  | c.1133 | 0.004886442 | 7.677 | 1 |
| 3858 | ADAM22   | ENST00000315984 | p.Y240C  | c.719  | 0.004886442 | 0     | 1 |
| 3859 | ACADM    | ENST00000370834 | p.Y370C  | c.1109 | 0.194445175 | 2.456 | 1 |
| 3859 | ACADM    | ENST00000370834 | p.Q49P   | c.146  | 0.020089431 | 6.382 | 1 |
| 3859 | ACADM    | ENST00000370834 | p.R53C   | c.157  | 0.026562534 | 5.476 | 1 |
| 3859 | ACADM    | ENST00000370834 | p.E143Q  | c.427  | 0.216709135 | 0     | 1 |
| 3860 | HUWE1    | ENST00000342160 | p.L1325V | c.3973 | 0.025085543 | 0     | 1 |
| 3860 | HUWE1    | ENST00000342160 | p.E1350K | c.4048 | 0.025085543 | 5.317 | 1 |
| 3861 | TBC1D1   | ENST00000261439 | p.G1007R | c.3019 | 0.017062821 | 0     | 1 |
| 3861 | TBC1D1   | ENST00000261439 | p.M1048V | c.3142 | 0.017062821 | 5.873 | 1 |
| 3862 | SERPING1 | ENST00000403558 | p.I363M  | c.1089 | 0.092321817 | 3.471 | 1 |
| 3862 | SERPING1 | ENST00000403558 | p.P366R  | c.1097 | 0.0258547   | 5.398 | 1 |
| 3862 | SERPING1 | ENST00000403558 | p.R542G  | c.1624 | 0.113898969 | 0     | 1 |
| 3863 | NAALAD2  | ENST00000534061 | p.R360K  | c.1079 | 0.235024751 | 8.907 | 1 |
| 3863 | NAALAD2  | ENST00000534061 | p.R404I  | c.1211 | 0.148934305 | 5.432 | 1 |
| 3863 | NAALAD2  | ENST00000534061 | p.P584L  | c.1751 | 1.025246722 | 0     | 2 |
| 3864 | MAT2A    | ENST00000306434 | p.A55D   | c.164  | 0.10083022  | 0     | 1 |
| 3864 | MAT2A    | ENST00000306434 | p.G284E  | c.851  | 0.10083022  | 3.31  | 1 |
| 3865 | APOBEC3C | ENST00000361441 | p.R122H  | c.365  | 0.078454499 | 3.672 | 1 |
| 3865 | APOBEC3C | ENST00000361441 | p.R30Q   | c.89   | 0.078454499 | 0     | 1 |
| 3866 | IKBKB    | ENST00000520810 | p.L414F  | c.1240 | 0.242154547 | 3.046 | 1 |
| 3866 | IKBKB    | ENST00000520810 | p.D248Y  | c.742  | 1.121077274 | 0     | 2 |
| 3867 | MAP2K4   | ENST00000415385 | p.P367S  | c.1099 | 0.242503871 | 3.909 | 1 |
| 3867 | MAP2K4   | ENST00000415385 | p.R298H  | c.893  | 1.073106968 | 0     | 2 |
| 3867 | MAP2K4   | ENST00000415385 | p.V301F  | c.901  | 0.112380123 | 7.257 | 1 |
| 3868 | SLC4A1   | ENST00000262418 | p.R80C   | c.238  | 2.121860625 | 0     | 1 |
| 3868 | SLC4A1   | ENST00000262418 | p.R80H   | c.239  | 2.121860625 | 0     | 2 |
| 3868 | SLC4A1   | ENST00000262418 | p.S212L  | c.635  | 0.023098813 | 7.021 | 1 |
| 3868 | SLC4A1   | ENST00000262418 | p.E257K  | c.769  | 0.31489931  | 3.252 | 1 |
| 3868 | SLC4A1   | ENST00000262418 | p.A286S  | c.856  | 0.037115787 | 6.765 | 1 |
| 3869 | DUPD1    | ENST00000338487 | p.F119L  | c.357  | 0.010964623 | 0     | 1 |
| 3869 | DUPD1    | ENST00000338487 | p.R153W  | c.457  | 0.010964623 | 6.511 | 1 |
| 3870 | PANK3    | ENST00000239231 | p.Y356N  | c.1066 | 0.022421086 | 5.479 | 1 |
| 3870 | PANK3    | ENST00000239231 | p.R325H  | c.974  | 0.022421086 | 0     | 1 |
| 3871 | SI       | ENST00000264382 | p.V116F  | c.346  | 0.017181502 | 0     | 1 |
| 3871 | SI       | ENST00000264382 | p.S200R  | c.600  | 0.017181502 | 5.863 | 1 |
| 3872 | ANXA5    | ENST00000296511 | p.K76I   | c.227  | 0.023373215 | 0     | 1 |
| 3872 | ANXA5    | ENST00000296511 | p.D303V  | c.908  | 0.023373215 | 5.419 | 1 |
| 3873 | CD40LG   | ENST00000370629 | p.E156K  | c.466  | 0.033169475 | 4.914 | 1 |
| 3873 | CD40LG   | ENST00000370629 | p.E202Q  | c.604  | 0.008566966 | 6.867 | 1 |

|      |         |                 |                    |             |             |       |   |
|------|---------|-----------------|--------------------|-------------|-------------|-------|---|
| 3873 | CD40LG  | ENST00000370629 | p.R203I            | c.608       | 0.009916179 | 6.656 | 1 |
| 3873 | CD40LG  | ENST00000370629 | p.S236L            | c.707       | 0.05165262  | 0     | 1 |
| 3874 | ST14    | ENST00000278742 | p.G250E            | c.749       | 1.160027986 | 0     | 2 |
| 3874 | ST14    | ENST00000278742 | p.S254A            | c.760       | 0.137685144 | 6.017 | 1 |
| 3874 | ST14    | ENST00000278742 | p.N310K            | c.930       | 0.395973264 | 2.79  | 1 |
| 3875 | STIP1   | ENST00000358794 | p.N446S            | c.1337      | 0.046391362 | 0     | 1 |
| 3875 | STIP1   | ENST00000358794 | p.R480Q            | c.1439      | 0.046391362 | 4.43  | 1 |
| 3876 | RYR2    | ENST00000360064 | p.R412C            | c.1234      | 1.044071811 | 0     | 1 |
| 3876 | RYR2    | ENST00000360064 | p.R412H            | c.1235      | 1.044071811 | 0     | 1 |
| 3876 | RYR2    | ENST00000360064 | p.S124G            | c.370       | 0.088143623 | 4.504 | 1 |
| 3877 | TF      | ENST00000402696 | p.G383R            | c.1147      | 0.013350152 | 0     | 1 |
| 3877 | TF      | ENST00000402696 | p.Q623K            | c.1867      | 0.013350152 | 6.227 | 1 |
| 3878 | RNH1    | ENST00000438658 | p.S50C             | c.149       | 0.010159689 | 6.621 | 1 |
| 3878 | RNH1    | ENST00000438658 | p.E22Q             | c.64        | 0.010159689 | 0     | 1 |
| 3879 | PRLR    | ENST00000382002 | p.H197Y            | c.589       | 1.053419567 | 0     | 1 |
| 3879 | PRLR    | ENST00000382002 | p.H197Q            | c.591       | 1.053419567 | 0     | 1 |
| 3879 | PRLR    | ENST00000382002 | p.P227R            | c.680       | 0.067311649 | 4.893 | 1 |
| 3879 | PRLR    | ENST00000382002 | p.S228T            | c.683       | 0.039527486 | 5.661 | 1 |
| 3880 | U2AF2   | ENST00000308924 | p.K413R            | c.1238      | 0.264988196 | 1.916 | 1 |
| 3880 | U2AF2   | ENST00000308924 | p.E435in_frame_del | c.1302_1304 | 0.264988196 | 0     | 1 |
| 3881 | NR4A2   | ENST00000539077 | p.T422I            | c.1265      | 0.004325252 | 7.853 | 1 |
| 3881 | NR4A2   | ENST00000539077 | p.D600H            | c.1798      | 0.004325252 | 0     | 1 |
| 3882 | EIF5    | ENST00000216554 | p.V42I             | c.124       | 0.172478374 | 5.205 | 1 |
| 3882 | EIF5    | ENST00000216554 | p.182in_frame_insP | c.532_533   | 1.256361595 | 0     | 2 |
| 3882 | EIF5    | ENST00000216554 | p.R20S             | c.58        | 0.576759227 | 2.125 | 1 |
| 3883 | SULT1C3 | ENST00000376700 | p.S180T            | c.538       | 0.011751592 | 6.411 | 1 |
| 3884 | XRCC5   | ENST00000392132 | p.E621K            | c.1861      | 1.055629733 | 0     | 2 |
| 3884 | XRCC5   | ENST00000392132 | p.R643W            | c.1927      | 0.111259467 | 4.168 | 1 |
| 3885 | ENPEP   | ENST00000265162 | p.R655H            | c.1964      | 0.031141883 | 0     | 1 |
| 3885 | ENPEP   | ENST00000265162 | p.E687D            | c.2061      | 0.031141883 | 5.005 | 1 |
| 3886 | PDHA1   | ENST00000379806 | p.A250S            | c.748       | 0.022987605 | 6.443 | 1 |
| 3886 | PDHA1   | ENST00000379806 | p.G284D            | c.851       | 1.011493803 | 0     | 2 |
| 3887 | TUSC3   | ENST00000503731 | p.I65L             | c.193       | 0.089374062 | 0     | 1 |
| 3887 | TUSC3   | ENST00000503731 | p.A113S            | c.337       | 0.089374062 | 3.484 | 1 |
| 3888 | TUSC3   | ENST00000503731 | p.Q55K             | c.163       | 0.117123352 | 4.741 | 1 |
| 3888 | TUSC3   | ENST00000503731 | p.R82L             | c.245       | 2.169430983 | 0     | 1 |
| 3888 | TUSC3   | ENST00000503731 | p.R82Q             | c.245       | 2.169430983 | 0     | 2 |
| 3888 | TUSC3   | ENST00000503731 | p.P155S            | c.463       | 0.401044622 | 2.921 | 1 |
| 3889 | SOCS2   | ENST00000551556 | p.E98K             | c.292       | 0.002720335 | 0     | 1 |
| 3889 | SOCS2   | ENST00000551556 | p.D120H            | c.358       | 0.002720335 | 8.522 | 1 |
| 3890 | DOCK2   | ENST00000256935 | p.R36Q             | c.107       | 1.009892814 | 0     | 2 |
| 3890 | DOCK2   | ENST00000256935 | p.G57D             | c.170       | 0.129368112 | 6.812 | 1 |
| 3890 | DOCK2   | ENST00000256935 | p.P25S             | c.73        | 0.113554259 | 9.976 | 1 |
| 3891 | CTSZ    | ENST00000217131 | p.W68R             | c.202       | 0.096887472 | 0     | 1 |
| 3891 | CTSZ    | ENST00000217131 | p.A96T             | c.286       | 0.069392292 | 3.891 | 1 |
| 3891 | CTSZ    | ENST00000217131 | p.S262L            | c.785       | 0.039110831 | 5.084 | 1 |
| 3892 | PTPN6   | ENST00000456013 | p.G477S            | c.1429      | 0.035378091 | 4.821 | 1 |
| 3892 | PTPN6   | ENST00000456013 | p.R21L             | c.62        | 0.035378091 | 0     | 1 |
| 3893 | RCOR1   | ENST00000262241 | p.V395G            | c.1184      | 0.007365504 | 0     | 1 |

|               |                 |                    |           |             |       |   |
|---------------|-----------------|--------------------|-----------|-------------|-------|---|
| 3893 RCOR1    | ENST00000262241 | p.E439K            | c.1315    | 0.007365504 | 7.085 | 1 |
| 3894 SERPINB3 | ENST00000283752 | p.E100K            | c.298     | 0.003157503 | 8.307 | 1 |
| 3894 SERPINB3 | ENST00000283752 | p.T129S            | c.386     | 0.007154169 | 7.127 | 1 |
| 3894 SERPINB3 | ENST00000283752 | p.Q154L            | c.461     | 0.010311673 | 0     | 1 |
| 3895 PIP      | ENST00000291009 | p.K38N             | c.114     | 0.013317294 | 0     | 1 |
| 3895 PIP      | ENST00000291009 | p.P95S             | c.283     | 0.00298718  | 8.387 | 1 |
| 3895 PIP      | ENST00000291009 | p.K96E             | c.286     | 0.010330114 | 6.597 | 1 |
| 3896 AIM2     | ENST00000368130 | p.V336F            | c.1006    | 0.010401966 | 6.587 | 1 |
| 3896 AIM2     | ENST00000368130 | p.E299K            | c.895     | 0.010401966 | 0     | 1 |
| 3897 TRPV4    | ENST00000261740 | p.T380M            | c.1139    | 0.013994464 | 6.159 | 1 |
| 3897 TRPV4    | ENST00000261740 | p.A330T            | c.988     | 0.013994464 | 0     | 1 |
| 3898 RAP1A    | ENST00000436150 | p.K5N              | c.15      | 1.147419574 | 0     | 2 |
| 3898 RAP1A    | ENST00000436150 | p.E54K             | c.160     | 0.294839148 | 2.762 | 1 |
| 3899 IGF2BP1  | ENST00000290341 | p.T517M            | c.1550    | 0.108894274 | 3.199 | 1 |
| 3899 IGF2BP1  | ENST00000290341 | p.A545V            | c.1634    | 0.108894274 | 0     | 1 |
| 3900 HBD      | ENST00000380299 | p.P37H             | c.110     | 0.150760973 | 2.923 | 1 |
| 3900 HBD      | ENST00000380299 | p.P101S            | c.301     | 0.013798797 | 9.281 | 1 |
| 3900 HBD      | ENST00000380299 | p.E102D            | c.306     | 0.184402272 | 0     | 1 |
| 3900 HBD      | ENST00000380299 | p.R31K             | c.92      | 0.057658868 | 4.295 | 1 |
| 3901 HSCB     | ENST00000216027 | p.S82F             | c.245     | 0.002765968 | 8.498 | 1 |
| 3901 HSCB     | ENST00000216027 | p.V199A            | c.596     | 0.002765968 | 0     | 1 |
| 3902 IKBKB    | ENST00000520810 | p.A357S            | c.1069    | 0.148169534 | 0     | 1 |
| 3902 IKBKB    | ENST00000520810 | p.D385V            | c.1154    | 0.005277243 | 7.566 | 1 |
| 3902 IKBKB    | ENST00000520810 | p.M456I            | c.1368    | 0.142892292 | 2.807 | 1 |
| 3903 SNAP25   | ENST00000304886 | p.R59C             | c.175     | 0.008537104 | 8.457 | 1 |
| 3903 SNAP25   | ENST00000304886 | p.R8H              | c.23      | 2.002845701 | 0     | 3 |
| 3904 MGAM     | ENST00000475668 | p.P641T            | c.1921    | 0.012250632 | 6.351 | 1 |
| 3904 MGAM     | ENST00000475668 | p.R275W            | c.823     | 0.012250632 | 0     | 1 |
| 3905 USP7     | ENST00000344836 | p.P471L            | c.1412    | 0.093234002 | 0     | 1 |
| 3905 USP7     | ENST00000344836 | p.F234V            | c.700     | 0.093234002 | 3.423 | 1 |
| 3906 RCVRN    | ENST00000226193 | p.K84R             | c.251     | 0.094797972 | 3.399 | 1 |
| 3906 RCVRN    | ENST00000226193 | p.E16K             | c.46      | 0.094797972 | 0     | 1 |
| 3907 CTPS1    | ENST00000372616 | p.R164C            | c.490     | 0.053474689 | 0     | 1 |
| 3907 CTPS1    | ENST00000372616 | p.R205K            | c.614     | 0.053474689 | 4.225 | 1 |
| 3908 GIF      | ENST00000257248 | p.N185in_frame_del | c.557_555 | 0.008949359 | 6.804 | 1 |
| 3908 GIF      | ENST00000257248 | p.P290T            | c.868     | 0.008949359 | 0     | 1 |
| 3909 C6       | ENST00000263413 | p.P649S            | c.1945    | 1.013792234 | 0     | 1 |
| 3909 C6       | ENST00000263413 | p.P649L            | c.1946    | 1.013792234 | 0     | 1 |
| 3909 C6       | ENST00000263413 | p.S671L            | c.2012    | 0.027584469 | 6.18  | 1 |
| 3910 TNFSF12  | ENST00000557233 | p.S142N            | c.425     | 0.00231303  | 8.756 | 1 |
| 3911 PTK6     | ENST00000217185 | p.G60V             | c.179     | 0.186597298 | 0     | 1 |
| 3911 PTK6     | ENST00000217185 | p.D24N             | c.70      | 0.186597298 | 2.422 | 1 |
| 3912 CWC22    | ENST00000410053 | p.R246Q            | c.737     | 0.006129563 | 0     | 1 |
| 3912 CWC22    | ENST00000410053 | p.R284T            | c.851     | 0.006129563 | 7.35  | 1 |
| 3913 PELI2    | ENST00000267460 | p.A158V            | c.473     | 0.047202268 | 0     | 1 |
| 3913 PELI2    | ENST00000267460 | p.V190I            | c.568     | 0.047202268 | 4.405 | 1 |
| 3914 FNTB     | ENST00000447296 | p.A339V            | c.1016    | 0.025683756 | 5.283 | 1 |
| 3914 FNTB     | ENST00000447296 | p.G403S            | c.1207    | 0.025683756 | 0     | 1 |
| 3915 RPL18A   | ENST00000222247 | p.R43C             | c.127     | 0.005656008 | 8.466 | 1 |

|               |                 |          |               |             |       |   |
|---------------|-----------------|----------|---------------|-------------|-------|---|
| 3915 RPL18A   | ENST00000222247 | p.R83C   | c.247         | 1.002828004 | 0     | 1 |
| 3915 RPL18A   | ENST00000222247 | p.R83H   | c.248         | 1.002828004 | 0     | 1 |
| 3916 AGO2     | ENST00000220592 | p.P340L  | c.1019        | 0.031620413 | 4.983 | 1 |
| 3916 AGO2     | ENST00000220592 | p.A289S  | c.865         | 0.031620413 | 0     | 1 |
| 3917 SEMA7A   | ENST00000261918 | p.P400S  | c.1198        | 0.03471478  | 0     | 1 |
| 3917 SEMA7A   | ENST00000261918 | p.A294T  | c.880         | 0.028895727 | 5.113 | 1 |
| 3917 SEMA7A   | ENST00000261918 | p.G323S  | c.967         | 0.005819053 | 7.425 | 1 |
| 3918 GDA      | ENST00000238018 | p.D172Y  | c.514         | 0.279344718 | 0     | 1 |
| 3918 GDA      | ENST00000238018 | p.S215F  | c.644         | 0.147898092 | 2.96  | 1 |
| 3918 GDA      | ENST00000238018 | p.S219T  | c.655         | 0.170214354 | 2.729 | 1 |
| 3919 IL20RB   | ENST00000329582 | p.H129R  | c.386         | 0.015964589 | 9.607 | 1 |
| 3919 IL20RB   | ENST00000329582 | p.E164Q  | c.490         | 0.003330605 | 9.23  | 1 |
| 3919 IL20RB   | ENST00000329582 | p.A217T  | c.649         | 1.002947647 | 0     | 2 |
| 3920 ITGAV    | ENST00000261023 | p.S501Y  | c.1502        | 0.0522654   | 4.258 | 1 |
| 3920 ITGAV    | ENST00000261023 | p.Y545C  | c.1634        | 0.01573368  | 5.99  | 1 |
| 3920 ITGAV    | ENST00000261023 | p.A570V  | c.1709        | 0.06799908  | 0     | 1 |
| 3921 LINGO1   | ENST00000355300 | p.A186T  | c.556         | 0.006091444 | 7.359 | 1 |
| 3921 LINGO1   | ENST00000355300 | p.L211M  | c.631         | 0.010292594 | 0     | 1 |
| 3921 LINGO1   | ENST00000355300 | p.Y239N  | c.715         | 0.00420115  | 7.895 | 1 |
| 3922 UBA3     | ENST00000361055 | p.L406P  | c.1217        | 0.007188966 | 0     | 1 |
| 3922 UBA3     | ENST00000361055 | p.K434N  | c.1302        | 0.007188966 | 7.12  | 1 |
| 3923 ARHGEF12 | ENST00000397843 | p.R993C  | c.2977        | 0.122937759 | 0     | 1 |
| 3923 ARHGEF12 | ENST00000397843 | p.D1055V | c.3164        | 0.122937759 | 3.024 | 1 |
| 3924 TNPO1    | ENST00000337273 | p.S695Y  | c.2084        | 0.008021012 | 0     | 1 |
| 3924 TNPO1    | ENST00000337273 | p.I720M  | c.2160        | 0.008021012 | 6.962 | 1 |
| 3925 SPEN     | ENST00000375759 | p.R3536G | c.10606       | 0.057800999 | 4.461 | 1 |
| 3925 SPEN     | ENST00000375759 | p.S3537Y | c.10610_10611 | 0.285400978 | 1.873 | 1 |
| 3925 SPEN     | ENST00000375759 | p.V3614D | c.10841       | 0.318410294 | 0     | 1 |
| 3926 JHDM1D   | ENST00000397560 | p.W100R  | c.298         | 0.006028438 | 7.374 | 1 |
| 3926 JHDM1D   | ENST00000397560 | p.K124M  | c.371         | 0.006028438 | 0     | 1 |
| 3927 SULT1A1  | ENST00000395609 | p.G165E  | c.494         | 0.089250249 | 3.486 | 1 |
| 3927 SULT1A1  | ENST00000395609 | p.P19L   | c.56          | 0.089250249 | 0     | 1 |
| 3928 EPHA7    | ENST00000369303 | p.T814P  | c.2440        | 0.088572337 | 0     | 1 |
| 3928 EPHA7    | ENST00000369303 | p.R877L  | c.2630        | 0.088572337 | 3.497 | 1 |
| 3929 EPRS     | ENST00000366923 | p.D1191H | c.3571        | 0.022908074 | 0     | 1 |
| 3929 EPRS     | ENST00000366923 | p.I1225V | c.3673        | 0.022908074 | 5.448 | 1 |
| 3930 MC4R     | ENST00000299766 | p.L141H  | c.422         | 0.084085451 | 3.572 | 1 |
| 3930 MC4R     | ENST00000299766 | p.M204L  | c.610         | 0.084085451 | 0     | 1 |
| 3931 CUL5     | ENST00000531427 | p.V185I  | c.553         | 0.060162153 | 4.055 | 1 |
| 3931 CUL5     | ENST00000531427 | p.R253Q  | c.758         | 0.060162153 | 0     | 1 |
| 3932 PPP5C    | ENST00000012443 | p.V348L  | c.1042        | 0.013257936 | 0     | 1 |
| 3932 PPP5C    | ENST00000012443 | p.R470Q  | c.1409        | 0.013257936 | 6.237 | 1 |
| 3933 SULT2B1  | ENST00000201586 | p.F135L  | c.405         | 0.04648793  | 4.427 | 1 |
| 3933 SULT2B1  | ENST00000201586 | p.K282N  | c.846         | 0.04648793  | 0     | 1 |
| 3934 ACOT7    | ENST00000377855 | p.V348A  | c.1043        | 0.015700997 | 5.993 | 1 |
| 3934 ACOT7    | ENST00000377855 | p.H265R  | c.794         | 0.015700997 | 0     | 1 |
| 3935 CTSE     | ENST00000361052 | p.L375M  | c.1123        | 0.055986322 | 4.238 | 1 |
| 3935 CTSE     | ENST00000361052 | p.F56L   | c.168         | 0.059436731 | 4.147 | 1 |
| 3935 CTSE     | ENST00000361052 | p.C281R  | c.841         | 0.109440405 | 0     | 1 |

|              |                 |         |           |             |       |   |
|--------------|-----------------|---------|-----------|-------------|-------|---|
| 3936 GSN     | ENST00000373818 | p.G404D | c.1211    | 0.109499789 | 3.191 | 1 |
| 3936 GSN     | ENST00000373818 | p.K660E | c.1978    | 0.109499789 | 0     | 1 |
| 3937 GSR     | ENST00000221130 | p.S187G | c.559     | 0.026681804 | 5.228 | 1 |
| 3937 GSR     | ENST00000221130 | p.P314S | c.940     | 0.026681804 | 0     | 1 |
| 3938 UBE3A   | ENST00000397954 | p.R649C | c.1945    | 0.238010785 | 0     | 1 |
| 3938 UBE3A   | ENST00000397954 | p.I682V | c.2044    | 0.114084013 | 3.318 | 1 |
| 3938 UBE3A   | ENST00000397954 | p.Q684H | c.2052    | 0.151549507 | 2.86  | 1 |
| 3939 MARK1   | ENST00000366917 | p.I354V | c.1060    | 0.009748175 | 0     | 1 |
| 3939 MARK1   | ENST00000366917 | p.P328R | c.983     | 0.006537705 | 7.257 | 1 |
| 3939 MARK1   | ENST00000366917 | p.D329N | c.985     | 0.003210469 | 8.283 | 1 |
| 3940 CKMT1B  | ENST00000300283 | p.L334V | c.1000    | 1.011312017 | 0     | 1 |
| 3940 CKMT1B  | ENST00000300283 | p.L334R | c.1001    | 1.011312017 | 0     | 1 |
| 3940 CKMT1B  | ENST00000300283 | p.L310F | c.930     | 0.022624034 | 6.466 | 1 |
| 3941 FGF23   | ENST00000237837 | p.H41Y  | c.121_120 | 0.092333629 | 3.437 | 1 |
| 3941 FGF23   | ENST00000237837 | p.A72S  | c.214     | 0.092333629 | 0     | 1 |
| 3943 FKBP4   | ENST00000001008 | p.G82R  | c.244     | 0.02664484  | 5.23  | 1 |
| 3943 FKBP4   | ENST00000001008 | p.R157H | c.470     | 0.02664484  | 0     | 1 |
| 3944 EPHA3   | ENST00000336596 | p.P48S  | c.142     | 0.064704058 | 3.95  | 1 |
| 3944 EPHA3   | ENST00000336596 | p.N79T  | c.236     | 0.064704058 | 0     | 1 |
| 3945 IDH2    | ENST00000330062 | p.A370T | c.1108    | 0.034866854 | 4.842 | 1 |
| 3945 IDH2    | ENST00000330062 | p.T331M | c.992     | 0.034866854 | 0     | 1 |
| 3946 BRDT    | ENST00000402388 | p.K71N  | c.213     | 0.045310839 | 0     | 1 |
| 3946 BRDT    | ENST00000402388 | p.E123D | c.369     | 0.045310839 | 4.464 | 1 |
| 3947 PKN1    | ENST00000342216 | p.A151V | c.452     | 1.168054374 | 0     | 2 |
| 3947 PKN1    | ENST00000342216 | p.A172D | c.515     | 0.336108749 | 2.573 | 1 |
| 3948 DCUN1D1 | ENST00000292782 | p.F89L  | c.265     | 0.075939799 | 0     | 1 |
| 3948 DCUN1D1 | ENST00000292782 | p.I134M | c.402     | 0.075939799 | 3.719 | 1 |
| 3949 G6PD    | ENST00000369620 | p.A71V  | c.212     | 0.025880333 | 5.272 | 1 |
| 3949 G6PD    | ENST00000369620 | p.Y112H | c.334     | 0.025880333 | 0     | 1 |
| 3950 ECH1    | ENST00000221418 | p.T147A | c.439     | 0.010416396 | 6.585 | 1 |
| 3950 ECH1    | ENST00000221418 | p.S296F | c.887     | 0.010416396 | 0     | 1 |
| 3951 MST1R   | ENST00000296474 | p.R504H | c.1511    | 0.080436828 | 0     | 1 |
| 3951 MST1R   | ENST00000296474 | p.E62K  | c.184     | 0.080436828 | 3.636 | 1 |
| 3952 IL22RA1 | ENST00000270800 | p.G61E  | c.182     | 0.010972226 | 6.51  | 1 |
| 3952 IL22RA1 | ENST00000270800 | p.E90K  | c.268     | 0.010972226 | 0     | 1 |
| 3953 RHOA    | ENST00000418115 | p.F154C | c.461     | 0.009499057 | 0     | 1 |
| 3953 RHOA    | ENST00000418115 | p.T175M | c.524     | 0.009499057 | 6.718 | 1 |
| 3954 CUL1    | ENST00000602748 | p.S646L | c.1937    | 1.043888902 | 0     | 2 |
| 3954 CUL1    | ENST00000602748 | p.L673I | c.2017    | 0.087777805 | 4.51  | 1 |
| 3955 ERCC4   | ENST00000311895 | p.P846S | c.2536    | 0.294022813 | 0     | 1 |
| 3955 ERCC4   | ENST00000311895 | p.T885M | c.2654    | 0.294022813 | 1.766 | 1 |
| 3956 DUSP9   | ENST00000370167 | p.A220V | c.659     | 0.092141826 | 3.44  | 1 |
| 3956 DUSP9   | ENST00000370167 | p.F243V | c.727     | 0.092141826 | 0     | 1 |
| 3957 ASPA    | ENST00000263080 | p.K224E | c.670     | 0.146706022 | 2.769 | 1 |
| 3957 ASPA    | ENST00000263080 | p.T299S | c.895     | 0.146706022 | 0     | 1 |
| 3958 LTF     | ENST00000231751 | p.E356K | c.1066    | 2.049343368 | 0     | 3 |
| 3958 LTF     | ENST00000231751 | p.G159S | c.475     | 0.148030104 | 4.341 | 1 |
| 3959 LRP6    | ENST00000261349 | p.L635W | c.1904    | 0.076860367 | 6.652 | 1 |
| 3959 LRP6    | ENST00000261349 | p.R675Q | c.2024    | 3.00994371  | 0     | 4 |

|              |                 |                    |             |             |       |   |
|--------------|-----------------|--------------------|-------------|-------------|-------|---|
| 3960 NRP2    | ENST00000360409 | p.R522C            | c.1564      | 1.027185855 | 0     | 1 |
| 3960 NRP2    | ENST00000360409 | p.R522H            | c.1565      | 1.027185855 | 0     | 1 |
| 3960 NRP2    | ENST00000360409 | p.P580L            | c.1739      | 0.05437171  | 5.201 | 1 |
| 3961 UHRF2   | ENST00000276893 | p.Q4R              | c.11        | 0.007850499 | 0     | 1 |
| 3961 UHRF2   | ENST00000276893 | p.G64E             | c.191       | 0.007850499 | 6.993 | 1 |
| 3962 RPL19   | ENST00000225430 | p.R52C             | c.154       | 0.002744958 | 0     | 1 |
| 3962 RPL19   | ENST00000225430 | p.D25H             | c.73        | 0.002744958 | 8.509 | 1 |
| 3963 RAPH1   | ENST00000374493 | p.R377I            | c.1130      | 0.017181502 | 0     | 1 |
| 3963 RAPH1   | ENST00000374493 | p.P525L            | c.1574      | 0.017181502 | 5.863 | 1 |
| 3964 SKA1    | ENST00000398452 | p.V164A            | c.491       | 0.002240443 | 8.802 | 1 |
| 3964 SKA1    | ENST00000398452 | p.R191K            | c.572       | 0.0020602   | 8.923 | 1 |
| 3964 SKA1    | ENST00000398452 | p.T221S            | c.662       | 0.004300643 | 0     | 1 |
| 3965 ITGAX   | ENST00000562522 | p.P633R            | c.1898      | 0.012534081 | 0     | 1 |
| 3965 ITGAX   | ENST00000562522 | p.R1029W           | c.3085      | 0.012534081 | 6.318 | 1 |
| 3966 CHAT    | ENST00000337653 | p.A557V            | c.1670      | 1.094143154 | 0     | 2 |
| 3966 CHAT    | ENST00000337653 | p.A614V            | c.1841      | 0.188286308 | 3.409 | 1 |
| 3967 OAS1    | ENST00000445409 | p.D13E             | c.39        | 0.111028349 | 3.171 | 1 |
| 3967 OAS1    | ENST00000445409 | p.K204E            | c.610       | 0.111028349 | 0     | 1 |
| 3968 UPP1    | ENST00000341253 | p.K54Q             | c.160       | 0.179090018 | 0     | 1 |
| 3968 UPP1    | ENST00000341253 | p.P102L            | c.305       | 0.170007179 | 2.572 | 1 |
| 3968 UPP1    | ENST00000341253 | p.R130L            | c.389       | 0.03134964  | 6.517 | 1 |
| 3969 DCC     | ENST00000442544 | p.L588P            | c.1763      | 0.158439065 | 0     | 1 |
| 3969 DCC     | ENST00000442544 | p.T617R            | c.1850      | 0.158439065 | 2.658 | 1 |
| 3970 TNFSF11 | ENST00000398795 | p.M183I            | c.549       | 0.01683958  | 0     | 1 |
| 3970 TNFSF11 | ENST00000398795 | p.F207L            | c.621       | 0.01683958  | 5.892 | 1 |
| 3971 SENP7   | ENST00000394095 | p.E796K            | c.2386      | 0.075729541 | 3.723 | 1 |
| 3971 SENP7   | ENST00000394095 | p.C930R            | c.2788      | 0.075729541 | 0     | 1 |
| 3972 GBE1    | ENST00000429644 | p.D454Y            | c.1360      | 0.011932168 | 6.389 | 1 |
| 3972 GBE1    | ENST00000429644 | p.D459N            | c.1375      | 0.033077637 | 4.918 | 1 |
| 3972 GBE1    | ENST00000429644 | p.E609K            | c.1825      | 0.045009805 | 0     | 1 |
| 3973 DNNT    | ENST00000371174 | p.A56S             | c.166       | 0.234717937 | 0     | 1 |
| 3973 DNNT    | ENST00000371174 | p.I111K            | c.332       | 0.234717937 | 2.091 | 1 |
| 3974 CSF1R   | ENST00000286301 | p.E557D            | c.1671      | 0.041607863 | 0     | 1 |
| 3974 CSF1R   | ENST00000286301 | p.A767V            | c.2300      | 0.041607863 | 4.587 | 1 |
| 3975 VPS25   | ENST00000253794 | p.P8L              | c.23        | 0.01579878  | 7.182 | 1 |
| 3975 VPS25   | ENST00000253794 | p.Q10R             | c.29        | 0.023519278 | 5.87  | 1 |
| 3975 VPS25   | ENST00000253794 | p.W33R             | c.97        | 0.023984903 | 0     | 1 |
| 3976 SPSB1   | ENST00000328089 | p.S176F            | c.527       | 0.014367969 | 6.121 | 1 |
| 3976 SPSB1   | ENST00000328089 | p.R223Q            | c.668       | 0.014367969 | 0     | 1 |
| 3977 POLL    | ENST00000370169 | p.E569G            | c.1706      | 0.012149157 | 0     | 1 |
| 3977 POLL    | ENST00000370169 | p.Q247H            | c.741       | 0.012149157 | 6.363 | 1 |
| 3978 BMX     | ENST00000348343 | p.H390Q            | c.1170      | 0.076975406 | 0     | 1 |
| 3978 BMX     | ENST00000348343 | p.K313Q            | c.937       | 0.054265839 | 4.238 | 1 |
| 3978 BMX     | ENST00000348343 | p.M320V            | c.958       | 0.025251249 | 5.382 | 1 |
| 3979 TYK2    | ENST00000264818 | p.H907N            | c.2719      | 0.258827992 | 0     | 1 |
| 3979 TYK2    | ENST00000264818 | p.I960in_frame_del | c.2881_2879 | 0.042088401 | 7.564 | 1 |
| 3979 TYK2    | ENST00000264818 | p.R1027H           | c.3080      | 0.125744438 | 3.185 | 1 |
| 3979 TYK2    | ENST00000264818 | p.D1041A           | c.3122      | 0.196179435 | 2.8   | 1 |
| 3981 VPS33A  | ENST00000267199 | p.S414C            | c.1241      | 0.02146467  | 5.634 | 1 |



|             |                 |          |             |             |       |   |
|-------------|-----------------|----------|-------------|-------------|-------|---|
| 3981 VPS33A | ENST00000267199 | p.G419L  | c.1256_1255 | 0.067253961 | 3.923 | 1 |
| 3981 VPS33A | ENST00000267199 | p.P455L  | c.1364      | 0.086063498 | 0     | 1 |
| 3982 NRG1   | ENST00000523534 | p.C258S  | c.771_772   | 0.235043551 | 2.089 | 1 |
| 3982 NRG1   | ENST00000523534 | p.D287G  | c.860       | 0.235043551 | 0     | 1 |
| 3983 EEF1E1 | ENST00000379715 | p.L102I  | c.304       | 0.074273944 | 0     | 1 |
| 3983 EEF1E1 | ENST00000379715 | p.N141S  | c.422       | 0.074273944 | 3.751 | 1 |
| 3984 RPA1   | ENST00000254719 | p.D366N  | c.1096      | 0.118503371 | 4.077 | 1 |
| 3984 RPA1   | ENST00000254719 | p.A329T  | c.985       | 1.059251685 | 0     | 2 |
| 3985 RPRD1B | ENST00000373433 | p.R251C  | c.751       | 0.049790006 | 0     | 1 |
| 3985 RPRD1B | ENST00000373433 | p.K272T  | c.815       | 0.049790006 | 4.328 | 1 |
| 3986 MPP1   | ENST00000428488 | p.Q49H   | c.147       | 0.006939272 | 0     | 1 |
| 3987 GUSB   | ENST00000304895 | p.L501V  | c.1501      | 1.070364912 | 0     | 2 |
| 3987 GUSB   | ENST00000304895 | p.Q524H  | c.1572      | 0.140729823 | 3.829 | 1 |
| 3989 PILRB  | ENST00000448382 | p.P162L  | c.485       | 0.034386832 | 0     | 1 |
| 3990 ADH1B  | ENST00000305046 | p.L201Q  | c.602       | 0.007411596 | 7.076 | 1 |
| 3990 ADH1B  | ENST00000305046 | p.C212F  | c.635       | 0.106431713 | 3.232 | 1 |
| 3990 ADH1B  | ENST00000305046 | p.E235K  | c.703       | 0.11384331  | 0     | 1 |
| 3991 SETD7  | ENST00000274031 | p.D125N  | c.373       | 0.146689366 | 0     | 1 |
| 3991 SETD7  | ENST00000274031 | p.H310Y  | c.928       | 0.029263354 | 5.259 | 1 |
| 3991 SETD7  | ENST00000274031 | p.R320H  | c.959       | 0.123723534 | 3.052 | 1 |
| 3992 BCKDHA | ENST00000595085 | p.K85M   | c.254       | 0.01694496  | 5.883 | 1 |
| 3992 BCKDHA | ENST00000595085 | p.R114H  | c.341       | 0.01694496  | 0     | 1 |
| 3993 GABBR2 | ENST00000259455 | p.T160M  | c.479       | 0.070240583 | 3.853 | 1 |
| 3993 GABBR2 | ENST00000259455 | p.V162G  | c.485       | 0.016014662 | 6.061 | 1 |
| 3993 GABBR2 | ENST00000259455 | p.R207M  | c.620       | 0.084182153 | 0     | 1 |
| 3994 NCF4   | ENST00000397147 | p.E246K  | c.736       | 0.065561833 | 3.931 | 1 |
| 3995 RBBP4  | ENST00000373493 | p.P283S  | c.847       | 0.036246864 | 5.786 | 1 |
| 3995 RBBP4  | ENST00000373493 | p.E330K  | c.988       | 1.018123432 | 0     | 2 |
| 3996 MAP2K1 | ENST00000307102 | p.D67N   | c.199       | 0.010941846 | 6.514 | 1 |
| 3996 MAP2K1 | ENST00000307102 | p.R96K   | c.287       | 0.010941846 | 0     | 1 |
| 3997 DDB1   | ENST00000301764 | p.L427F  | c.1279      | 1.009156424 | 0     | 2 |
| 3997 DDB1   | ENST00000301764 | p.Q470K  | c.1408      | 0.018312848 | 6.771 | 1 |
| 3998 POT1   | ENST00000357628 | p.P34L   | c.101       | 0.175146447 | 0     | 1 |
| 3998 POT1   | ENST00000357628 | p.G272V  | c.815       | 0.106098601 | 3.343 | 1 |
| 3998 POT1   | ENST00000357628 | p.R273W  | c.817       | 0.040241661 | 4.824 | 1 |
| 3998 POT1   | ENST00000357628 | p.R276S  | c.828       | 0.046818927 | 4.598 | 1 |
| 3999 ADH1A  | ENST00000209668 | p.I221F  | c.661       | 0.007556846 | 7.048 | 1 |
| 3999 ADH1A  | ENST00000209668 | p.A222V  | c.665       | 0.007259068 | 7.106 | 1 |
| 3999 ADH1A  | ENST00000209668 | p.E257K  | c.769       | 0.014815914 | 0     | 1 |
| 4000 BLMH   | ENST00000261714 | p.D340G  | c.1019      | 0.005982648 | 7.385 | 1 |
| 4000 BLMH   | ENST00000261714 | p.V394L  | c.1180      | 0.005219039 | 7.582 | 1 |
| 4000 BLMH   | ENST00000261714 | p.F415L  | c.1245      | 0.024213809 | 0     | 1 |
| 4000 BLMH   | ENST00000261714 | p.K310M  | c.929       | 0.013012121 | 6.264 | 1 |
| 4001 RPL7A  | ENST00000323345 | p.T142A  | c.424       | 0.001369628 | 9.512 | 1 |
| 4001 RPL7A  | ENST00000323345 | p.F169L  | c.507       | 0.001369628 | 0     | 1 |
| 4003 VWF    | ENST00000261405 | p.I1825F | c.5473      | 0.096360994 | 0     | 1 |
| 4003 VWF    | ENST00000261405 | p.V1848M | c.5542      | 0.021805098 | 5.625 | 1 |
| 4003 VWF    | ENST00000261405 | p.L1851F | c.5551      | 0.077639856 | 3.716 | 1 |
| 4004 FOLH1  | ENST00000256999 | p.I456V  | c.1366      | 0.011164017 | 6.485 | 1 |

|               |                 |                    |             |             |       |   |
|---------------|-----------------|--------------------|-------------|-------------|-------|---|
| 4004 FOLH1    | ENST00000256999 | p.A535T            | c.1603      | 0.011164017 | 0     | 1 |
| 4005 ARL1     | ENST00000551671 | p.K104N            | c.312       | 0.008974206 | 6.8   | 1 |
| 4005 ARL1     | ENST00000551671 | p.V108I            | c.322       | 0.003515633 | 8.152 | 1 |
| 4005 ARL1     | ENST00000551671 | p.A147G            | c.440       | 0.012489838 | 0     | 1 |
| 4006 DDR2     | ENST00000367921 | p.S123I            | c.368       | 0.026060345 | 0     | 1 |
| 4006 DDR2     | ENST00000367921 | p.V160A            | c.479       | 0.026060345 | 5.262 | 1 |
| 4007 PDE5A    | ENST00000354960 | p.M419V            | c.1255      | 0.154856087 | 2.691 | 1 |
| 4007 PDE5A    | ENST00000354960 | p.K457Q            | c.1369      | 0.154856087 | 0     | 1 |
| 4008 EML1     | ENST00000334192 | p.G247E            | c.740       | 1.019613625 | 0     | 1 |
| 4008 EML1     | ENST00000334192 | p.G247V            | c.740       | 1.019613625 | 0     | 1 |
| 4008 EML1     | ENST00000334192 | p.V274L            | c.820       | 0.03922725  | 5.672 | 1 |
| 4009 RUFY1    | ENST00000319449 | p.F671in_frame_del | c.2009_2011 | 0.138408073 | 2.853 | 1 |
| 4009 RUFY1    | ENST00000319449 | p.C692S            | c.2074      | 0.138408073 | 0     | 1 |
| 4010 CYP2C8   | ENST00000371270 | p.R144H            | c.431       | 0.038246377 | 5.774 | 1 |
| 4010 CYP2C8   | ENST00000371270 | p.C151Y            | c.452       | 0.187390877 | 3.429 | 1 |
| 4010 CYP2C8   | ENST00000371270 | p.R186L            | c.557       | 1.111121865 | 0     | 1 |
| 4010 CYP2C8   | ENST00000371270 | p.R186Q            | c.557       | 1.111121865 | 0     | 1 |
| 4011 PAH      | ENST0000053106  | p.E381K            | c.1141      | 0.093609908 | 0     | 1 |
| 4011 PAH      | ENST0000053106  | p.D143Y            | c.427       | 0.055511295 | 4.228 | 1 |
| 4011 PAH      | ENST0000053106  | p.K274M            | c.821       | 0.042393989 | 4.635 | 1 |
| 4012 SERPINI1 | ENST00000446050 | p.S111F            | c.332       | 0.071943093 | 3.797 | 1 |
| 4012 SERPINI1 | ENST00000446050 | p.Q115H            | c.345       | 0.012023494 | 6.378 | 1 |
| 4012 SERPINI1 | ENST00000446050 | p.A179V            | c.536       | 0.083966587 | 0     | 1 |
| 4013 ACAA1    | ENST00000333167 | p.G410R            | c.1228      | 0.069878866 | 3.839 | 1 |
| 4013 ACAA1    | ENST00000333167 | p.G97E             | c.290       | 0.069878866 | 0     | 1 |
| 4014 TLR8     | ENST00000311912 | p.P450S            | c.1348      | 1.012031831 | 0     | 1 |
| 4014 TLR8     | ENST00000311912 | p.P450L            | c.1349      | 1.012031831 | 0     | 1 |
| 4014 TLR8     | ENST00000311912 | p.P516S            | c.1546      | 0.024063662 | 6.377 | 1 |
| 4015 TTBK1    | ENST00000259750 | p.R204C            | c.610       | 0.064928694 | 0     | 1 |
| 4015 TTBK1    | ENST00000259750 | p.K241N            | c.723       | 0.064928694 | 3.945 | 1 |
| 4016 PDE1C    | ENST00000396193 | p.Y256S            | c.767       | 0.105937773 | 4.593 | 1 |
| 4016 PDE1C    | ENST00000396193 | p.T314M            | c.941       | 1.04143518  | 0     | 2 |
| 4017 PPP2R2A  | ENST00000315985 | p.G143V            | c.428       | 0.094469996 | 0     | 1 |
| 4017 PPP2R2A  | ENST00000315985 | p.P165S            | c.493       | 0.094469996 | 3.404 | 1 |
| 4018 F9       | ENST00000218099 | p.V257I            | c.769       | 0.157903184 | 4.069 | 1 |
| 4018 F9       | ENST00000218099 | p.A279T            | c.835       | 1.061889385 | 0     | 2 |
| 4018 F9       | ENST00000218099 | p.G280C            | c.838       | 1.021678658 | 9.759 | 1 |
| 4018 F9       | ENST00000218099 | p.G280S            | c.838       | 1.021678658 | 9.759 | 1 |
| 4019 XIAP     | ENST00000371199 | p.L53I             | c.157       | 0.113668286 | 3.262 | 1 |
| 4019 XIAP     | ENST00000371199 | p.F64L             | c.192       | 0.099860336 | 3.467 | 1 |
| 4019 XIAP     | ENST00000371199 | p.R29I             | c.86        | 0.194674811 | 0     | 1 |
| 4020 AKT2     | ENST00000424901 | p.D388N            | c.1162      | 0.013193764 | 6.244 | 1 |
| 4020 AKT2     | ENST00000424901 | p.A330V            | c.989       | 0.013193764 | 0     | 1 |
| 4021 F9       | ENST00000218099 | p.V273I            | c.817       | 0.112948238 | 0     | 1 |
| 4021 F9       | ENST00000218099 | p.R294Q            | c.881       | 0.009426906 | 6.729 | 1 |
| 4021 F9       | ENST00000218099 | p.N295K            | c.885       | 0.103521333 | 3.272 | 1 |
| 4022 HGF      | ENST00000222390 | p.Y544F            | c.1631      | 0.040893065 | 4.612 | 1 |
| 4022 HGF      | ENST00000222390 | p.L565F            | c.1693      | 0.040893065 | 0     | 1 |
| 4023 APAF1    | ENST00000551964 | p.R352I            | c.1055      | 0.093234002 | 0     | 1 |

|      |         |                 |                    |           |             |       |   |
|------|---------|-----------------|--------------------|-----------|-------------|-------|---|
| 4023 | APAF1   | ENST00000551964 | p.E447G            | c.1340    | 0.093234002 | 3.423 | 1 |
| 4024 | IL10    | ENST00000423557 | p.C80Y             | c.239     | 0.014023595 | 6.156 | 1 |
| 4024 | IL10    | ENST00000423557 | p.R128G            | c.382     | 0.014023595 | 0     | 1 |
| 4025 | CHEK2   | ENST00000382580 | p.K178T            | c.533     | 0.012984555 | 6.467 | 1 |
| 4025 | CHEK2   | ENST00000382580 | p.T181A            | c.541     | 0.150331266 | 2.75  | 1 |
| 4025 | CHEK2   | ENST00000382580 | p.N209S            | c.626     | 0.159955068 | 0     | 1 |
| 4026 | LHCGR   | ENST00000294954 | p.N195H            | c.583     | 0.026333515 | 9.94  | 1 |
| 4026 | LHCGR   | ENST00000294954 | p.T197M            | c.590     | 0.082890864 | 0     | 1 |
| 4026 | LHCGR   | ENST00000294954 | p.T222L            | c.665_664 | 0.082094222 | 3.933 | 1 |
| 4026 | LHCGR   | ENST00000294954 | p.P224T            | c.670     | 0.027241779 | 5.93  | 1 |
| 4027 | TXNL4B  | ENST00000423037 | p.Y94C             | c.281     | 0.061554153 | 0     | 1 |
| 4027 | TXNL4B  | ENST00000423037 | p.L115F            | c.345     | 0.061554153 | 4.022 | 1 |
| 4028 | SEC14L2 | ENST00000312932 | p.P386S            | c.1156    | 0.065108964 | 0     | 1 |
| 4028 | SEC14L2 | ENST00000312932 | p.P299S            | c.895     | 0.065108964 | 3.941 | 1 |
| 4029 | ACTN4   | ENST00000252699 | p.F555L            | c.1665    | 0.169325182 | 2.657 | 1 |
| 4029 | ACTN4   | ENST00000252699 | p.A569V            | c.1706    | 0.078744282 | 3.879 | 1 |
| 4029 | ACTN4   | ENST00000252699 | p.R633W            | c.1897    | 0.226516949 | 0     | 1 |
| 4030 | CHAT    | ENST00000337653 | p.H460L            | c.1379    | 0.113282742 | 4.142 | 1 |
| 4030 | CHAT    | ENST00000337653 | p.R323H            | c.968     | 1.056641371 | 0     | 2 |
| 4031 | DCUN1D2 | ENST00000478244 | p.A106V            | c.317     | 0.017775082 | 6.814 | 1 |
| 4031 | DCUN1D2 | ENST00000478244 | p.F157C            | c.470     | 1.015461599 | 0     | 1 |
| 4031 | DCUN1D2 | ENST00000478244 | p.F157L            | c.471     | 1.015461599 | 0     | 1 |
| 4031 | DCUN1D2 | ENST00000478244 | p.L217M            | c.649     | 0.066253429 | 7.249 | 1 |
| 4032 | ALKBH3  | ENST00000302708 | p.R213C            | c.637     | 0.027603595 | 0     | 1 |
| 4032 | ALKBH3  | ENST00000302708 | p.D240N            | c.718     | 0.027603595 | 5.179 | 1 |
| 4033 | 3-Sep   | ENST00000396426 | p.W139L            | c.416     | 1.014771908 | 0     | 2 |
| 4033 | 3-Sep   | ENST00000396426 | p.T181K            | c.542     | 0.029543816 | 6.081 | 1 |
| 4034 | HTRA1   | ENST00000368984 | p.Y238H            | c.712     | 0.053772039 | 0     | 1 |
| 4034 | HTRA1   | ENST00000368984 | p.S271L            | c.812     | 0.053772039 | 4.217 | 1 |
| 4035 | TPK1    | ENST00000360057 | p.G168R            | c.502     | 0.104821023 | 0     | 1 |
| 4035 | TPK1    | ENST00000360057 | p.E230K            | c.688     | 0.104821023 | 3.254 | 1 |
| 4036 | PRTFDC1 | ENST00000320152 | p.G145E            | c.434     | 0.015700997 | 5.993 | 1 |
| 4036 | PRTFDC1 | ENST00000320152 | p.R148M            | c.443     | 0.049962864 | 4.323 | 1 |
| 4036 | PRTFDC1 | ENST00000320152 | p.R177K            | c.530     | 0.065663862 | 0     | 1 |
| 4037 | GC      | ENST00000504199 | p.R371K            | c.1112    | 0.137929218 | 0     | 1 |
| 4037 | GC      | ENST00000504199 | p.P263T            | c.787     | 0.137929218 | 2.858 | 1 |
| 4038 | CREBBP  | ENST00000262367 | p.R1091C           | c.3271    | 0.329191731 | 0     | 1 |
| 4038 | CREBBP  | ENST00000262367 | p.D1143H           | c.3427    | 0.329191731 | 1.603 | 1 |
| 4039 | RASEF   | ENST00000376447 | p.F603I            | c.1807    | 0.010836179 | 6.528 | 1 |
| 4039 | RASEF   | ENST00000376447 | p.L630F            | c.1888    | 0.010836179 | 0     | 1 |
| 4040 | PTPN2   | ENST00000309660 | p.L193F            | c.577     | 0.083042863 | 0     | 1 |
| 4040 | PTPN2   | ENST00000309660 | p.G275E            | c.824     | 0.083042863 | 3.59  | 1 |
| 4041 | POR     | ENST0000047222  | p.H121in_frame_del | c.360_362 | 0.103091694 | 0     | 1 |
| 4042 | UBE2L6  | ENST00000287156 | p.N52D             | c.154     | 0.067498535 | 0     | 1 |
| 4042 | UBE2L6  | ENST00000287156 | p.V104F            | c.310     | 0.067498535 | 3.889 | 1 |
| 4043 | AGR3    | ENST00000310398 | p.H67Y             | c.199     | 0.010394758 | 6.588 | 1 |
| 4043 | AGR3    | ENST00000310398 | p.E103K            | c.307     | 0.010394758 | 0     | 1 |
| 4044 | IL2     | ENST00000226730 | p.G47E             | c.140     | 0.032419373 | 4.947 | 1 |
| 4044 | IL2     | ENST00000226730 | p.N49K             | c.147     | 0.013470993 | 6.214 | 1 |

|              |                 |          |        |             |       |   |
|--------------|-----------------|----------|--------|-------------|-------|---|
| 4044 IL2     | ENST00000226730 | p.A93V   | c.278  | 0.045890366 | 0     | 1 |
| 4045 TNPO3   | ENST00000393245 | p.K547M  | c.1640 | 0.087503439 | 0     | 1 |
| 4045 TNPO3   | ENST00000393245 | p.D583N  | c.1747 | 0.00728932  | 7.1   | 1 |
| 4045 TNPO3   | ENST00000393245 | p.S584F  | c.1751 | 0.080214119 | 3.64  | 1 |
| 4046 BRD3    | ENST00000303407 | p.P80L   | c.239  | 0.211100222 | 0     | 1 |
| 4046 BRD3    | ENST00000303407 | p.P23L   | c.68   | 0.211100222 | 2.244 | 1 |
| 4047 RPL6    | ENST00000424576 | p.L150V  | c.448  | 0.009806812 | 7.672 | 1 |
| 4047 RPL6    | ENST00000424576 | p.F193C  | c.578  | 1.004903406 | 0     | 2 |
| 4048 MET     | ENST00000318493 | p.D1198Y | c.3592 | 0.015887104 | 6.976 | 1 |
| 4048 MET     | ENST00000318493 | p.R1297I | c.3890 | 1.018075111 | 0     | 1 |
| 4048 MET     | ENST00000318493 | p.R1297K | c.3890 | 1.018075111 | 0     | 1 |
| 4048 MET     | ENST00000318493 | p.Y1374C | c.4121 | 0.020263118 | 6.625 | 1 |
| 4049 PPP2R5C | ENST00000422945 | p.E247K  | c.739  | 0.160762185 | 3.637 | 1 |
| 4049 PPP2R5C | ENST00000422945 | p.S290Y  | c.869  | 1.080381093 | 0     | 2 |
| 4050 CTSB    | ENST00000353047 | p.I99M   | c.297  | 0.321806056 | 4.591 | 1 |
| 4050 CTSB    | ENST00000353047 | p.T163A  | c.487  | 0.25863935  | 6.657 | 1 |
| 4050 CTSB    | ENST00000353047 | p.R281S  | c.841  | 1.051401969 | 0     | 1 |
| 4050 CTSB    | ENST00000353047 | p.R281H  | c.842  | 1.051401969 | 0     | 1 |
| 4051 BLMH    | ENST00000261714 | p.E421K  | c.1261 | 0.014033318 | 6.155 | 1 |
| 4051 BLMH    | ENST00000261714 | p.I75V   | c.223  | 0.010280113 | 6.604 | 1 |
| 4051 BLMH    | ENST00000261714 | p.G145V  | c.434  | 0.024313432 | 0     | 1 |
| 4052 CANT1   | ENST00000591773 | p.K131R  | c.392  | 1.036071419 | 0     | 2 |
| 4052 CANT1   | ENST00000591773 | p.G192D  | c.575  | 0.072142839 | 4.793 | 1 |
| 4053 NCAM1   | ENST00000524665 | p.V620I  | c.1858 | 0.158867878 | 3.416 | 1 |
| 4053 NCAM1   | ENST00000524665 | p.T621N  | c.1862 | 0.146523152 | 2.9   | 1 |
| 4053 NCAM1   | ENST00000524665 | p.K641I  | c.1922 | 0.057559607 | 7.664 | 1 |
| 4053 NCAM1   | ENST00000524665 | p.G642R  | c.1924 | 0.23258983  | 0     | 1 |
| 4054 DDB2    | ENST00000256996 | p.L167F  | c.499  | 0.012895397 | 7.277 | 1 |
| 4054 DDB2    | ENST00000256996 | p.R192L  | c.575  | 1.006447699 | 0     | 1 |
| 4054 DDB2    | ENST00000256996 | p.R192Q  | c.575  | 1.006447699 | 0     | 1 |
| 4055 CA13    | ENST00000321764 | p.R81C   | c.241  | 0.141610486 | 2.82  | 1 |
| 4055 CA13    | ENST00000321764 | p.S184F  | c.551  | 0.141610486 | 0     | 1 |
| 4056 MB21D1  | ENST00000370315 | p.V234A  | c.701  | 0.044842173 | 4.479 | 1 |
| 4056 MB21D1  | ENST00000370315 | p.S326L  | c.977  | 0.044842173 | 0     | 1 |
| 4057 PRKCI   | ENST00000295797 | p.S544Y  | c.1631 | 0.089030173 | 4.509 | 1 |
| 4057 PRKCI   | ENST00000295797 | p.R278C  | c.832  | 1.071048716 | 0     | 2 |
| 4057 PRKCI   | ENST00000295797 | p.L315F  | c.943  | 0.055450269 | 5.204 | 1 |
| 4058 EIF2AK2 | ENST00000395127 | p.I405T  | c.1214 | 0.026607928 | 0     | 1 |
| 4058 EIF2AK2 | ENST00000395127 | p.D470Y  | c.1408 | 0.026607928 | 5.232 | 1 |
| 4059 HMBOX1  | ENST00000524238 | p.R268G  | c.802  | 1.012691444 | 0     | 1 |
| 4059 HMBOX1  | ENST00000524238 | p.R268Q  | c.803  | 1.012691444 | 0     | 1 |
| 4059 HMBOX1  | ENST00000524238 | p.Q290R  | c.869  | 0.025382887 | 6.3   | 1 |
| 4060 PRKCA   | ENST00000413366 | p.D503G  | c.1508 | 0.082412101 | 0     | 1 |
| 4060 PRKCA   | ENST00000413366 | p.V526I  | c.1576 | 0.082412101 | 3.601 | 1 |
| 4061 CLK3    | ENST00000395066 | p.R279H  | c.836  | 0.023373215 | 0     | 1 |
| 4061 CLK3    | ENST00000395066 | p.S329Y  | c.986  | 0.023373215 | 5.419 | 1 |
| 4062 CYP46A1 | ENST00000261835 | p.P390L  | c.1169 | 0.017445515 | 5.841 | 1 |
| 4062 CYP46A1 | ENST00000261835 | p.R76W   | c.226  | 0.017445515 | 0     | 1 |
| 4063 VPS35   | ENST00000299138 | p.H565R  | c.1694 | 0.004268663 | 7.872 | 1 |

|               |                 |         |           |             |       |   |
|---------------|-----------------|---------|-----------|-------------|-------|---|
| 4063 VPS35    | ENST00000299138 | p.G587R | c.1759    | 0.004268663 | 0     | 1 |
| 4064 ARHGDI B | ENST00000541644 | p.R169Q | c.506     | 0.024170233 | 0     | 1 |
| 4064 ARHGDI B | ENST00000541644 | p.S194L | c.581     | 0.010387556 | 6.589 | 1 |
| 4064 ARHGDI B | ENST00000541644 | p.E198G | c.593     | 0.013782678 | 6.181 | 1 |
| 4065 C12orf5  | ENST00000179259 | p.R88W  | c.262     | 1.159320078 | 0     | 1 |
| 4065 C12orf5  | ENST00000179259 | p.R88Q  | c.263     | 1.159320078 | 0     | 1 |
| 4065 C12orf5  | ENST00000179259 | p.Q25P  | c.74      | 0.318640157 | 2.65  | 1 |
| 4066 CAMK1D   | ENST00000378847 | p.E36K  | c.106     | 0.006647373 | 0     | 1 |
| 4066 CAMK1D   | ENST00000378847 | p.Y95H  | c.283     | 0.006647373 | 7.233 | 1 |
| 4067 PPP2CA   | ENST00000481195 | p.V87I  | c.259     | 0.013830528 | 0     | 1 |
| 4067 PPP2CA   | ENST00000481195 | p.Y265N | c.793     | 0.013830528 | 6.176 | 1 |
| 4068 IFNW1    | ENST00000380229 | p.D58Y  | c.172     | 0.003639611 | 0     | 1 |
| 4068 IFNW1    | ENST00000380229 | p.G149E | c.446     | 0.003639611 | 8.102 | 1 |
| 4069 CYP11A1  | ENST00000268053 | p.A236V | c.707     | 0.008644511 | 0     | 1 |
| 4069 CYP11A1  | ENST00000268053 | p.D265N | c.793     | 0.008644511 | 6.854 | 1 |
| 4070 GRHPR    | ENST00000607784 | p.E223K | c.667     | 0.173551457 | 0     | 1 |
| 4070 GRHPR    | ENST00000607784 | p.D247Y | c.739     | 0.141437834 | 3.057 | 1 |
| 4070 GRHPR    | ENST00000607784 | p.V248I | c.742     | 0.057779509 | 4.277 | 1 |
| 4070 GRHPR    | ENST00000607784 | p.P273R | c.818     | 0.01689455  | 9.108 | 1 |
| 4071 GZMM     | ENST00000264553 | p.R37C  | c.109     | 0.168988854 | 0     | 1 |
| 4071 GZMM     | ENST00000264553 | p.S146N | c.437     | 0.168988854 | 2.565 | 1 |
| 4072 SERPINB5 | ENST00000382771 | p.M172I | c.516     | 0.086241957 | 0     | 1 |
| 4072 SERPINB5 | ENST00000382771 | p.K224R | c.671     | 0.07780464  | 3.684 | 1 |
| 4072 SERPINB5 | ENST00000382771 | p.L226I | c.676     | 0.008437317 | 6.889 | 1 |
| 4073 LIG4     | ENST00000356922 | p.A67T  | c.199     | 0.007045901 | 0     | 1 |
| 4073 LIG4     | ENST00000356922 | p.L194V | c.580     | 0.007045901 | 7.149 | 1 |
| 4074 TRAF4    | ENST00000262395 | p.T387I | c.1160    | 0.016064279 | 5.96  | 1 |
| 4074 TRAF4    | ENST00000262395 | p.E463K | c.1387    | 0.016064279 | 0     | 1 |
| 4075 PMVK     | ENST00000368467 | p.R189H | c.566     | 0.048562954 | 0     | 1 |
| 4075 PMVK     | ENST00000368467 | p.L33H  | c.98      | 0.048562954 | 4.364 | 1 |
| 4076 ERBB4    | ENST00000342788 | p.F401S | c.1202    | 0.077794515 | 3.743 | 1 |
| 4076 ERBB4    | ENST00000342788 | p.L432M | c.1294    | 0.116294813 | 0     | 1 |
| 4076 ERBB4    | ENST00000342788 | p.G456E | c.1367    | 0.044715427 | 4.587 | 1 |
| 4077 ALDH2    | ENST00000261733 | p.A150V | c.449_450 | 0.007855942 | 0     | 1 |
| 4077 ALDH2    | ENST00000261733 | p.P198S | c.592     | 0.007855942 | 6.992 | 1 |
| 4078 CDC42    | ENST00000344548 | p.D65V  | c.194     | 0.021079727 | 5.568 | 1 |
| 4078 CDC42    | ENST00000344548 | p.H104Y | c.310     | 0.021079727 | 0     | 1 |
| 4079 AIM2     | ENST00000368130 | p.L255F | c.763     | 0.098216966 | 0     | 1 |
| 4079 AIM2     | ENST00000368130 | p.N320H | c.958     | 0.070205541 | 3.875 | 1 |
| 4079 AIM2     | ENST00000368130 | p.G321R | c.961     | 0.03210904  | 5.056 | 1 |
| 4080 EPHA4    | ENST00000281821 | p.K376M | c.1127    | 0.007427024 | 0     | 1 |
| 4080 EPHA4    | ENST00000281821 | p.Y126H | c.376     | 0.007427024 | 7.073 | 1 |
| 4081 CHKB     | ENST00000406938 | p.E119Q | c.355     | 0.0945355   | 3.403 | 1 |
| 4081 CHKB     | ENST00000406938 | p.R143Q | c.428     | 0.0945355   | 0     | 1 |
| 4082 C6       | ENST00000263413 | p.E538K | c.1612    | 0.038875364 | 5.685 | 1 |
| 4082 C6       | ENST00000263413 | p.G113W | c.337     | 1.019437682 | 0     | 1 |
| 4082 C6       | ENST00000263413 | p.G113V | c.338     | 1.019437682 | 0     | 1 |
| 4083 AMBP     | ENST00000265132 | p.W44G  | c.130     | 1.078237279 | 0     | 1 |
| 4083 AMBP     | ENST00000265132 | p.W44L  | c.131     | 1.078237279 | 0     | 1 |

|      |         |                 |          |        |             |       |   |
|------|---------|-----------------|----------|--------|-------------|-------|---|
| 4083 | AMBP    | ENST00000265132 | p.Y151H  | c.451  | 0.156474557 | 3.676 | 1 |
| 4084 | LDLR    | ENST00000557933 | p.P526S  | c.1576 | 1.019464647 | 0     | 2 |
| 4084 | LDLR    | ENST00000557933 | p.L571F  | c.1711 | 0.038929294 | 5.683 | 1 |
| 4085 | HSD11B1 | ENST00000367027 | p.G45E   | c.134  | 1.205897754 | 3.28  | 1 |
| 4085 | HSD11B1 | ENST00000367027 | p.G45V   | c.134  | 1.205897754 | 3.28  | 1 |
| 4085 | HSD11B1 | ENST00000367027 | p.E69K   | c.205  | 1.205897754 | 0     | 2 |
| 4086 | WWP1    | ENST00000517970 | p.F849L  | c.2545 | 0.169409801 | 0     | 1 |
| 4086 | WWP1    | ENST00000517970 | p.S887N  | c.2660 | 0.155547003 | 2.708 | 1 |
| 4086 | WWP1    | ENST00000517970 | p.R893C  | c.2677 | 0.018872706 | 5.933 | 1 |
| 4087 | PARP12  | ENST00000263549 | p.V526F  | c.1576 | 0.002364908 | 8.724 | 1 |
| 4087 | PARP12  | ENST00000263549 | p.S680T  | c.2038 | 0.002364908 | 0     | 1 |
| 4088 | RANBP2  | ENST00000283195 | p.M2075L | c.6223 | 0.129318448 | 0     | 1 |
| 4088 | RANBP2  | ENST00000283195 | p.A2124T | c.6370 | 0.129318448 | 2.951 | 1 |
| 4089 | CR2     | ENST00000367057 | p.R846C  | c.2536 | 0.036957219 | 0     | 1 |
| 4089 | CR2     | ENST00000367057 | p.H867N  | c.2599 | 0.036957219 | 4.758 | 1 |
| 4090 | API5    | ENST00000531273 | p.R355Q  | c.1064 | 0.124567533 | 3.005 | 1 |
| 4090 | API5    | ENST00000531273 | p.S437N  | c.1310 | 0.124567533 | 0     | 1 |
| 4091 | GTF2F1  | ENST00000394456 | p.Q58H   | c.174  | 0.135465746 | 2.884 | 1 |
| 4091 | GTF2F1  | ENST00000394456 | p.V87I   | c.259  | 0.135465746 | 0     | 1 |
| 4092 | FDPS    | ENST00000356657 | p.R178C  | c.532  | 0.241374314 | 0     | 1 |
| 4092 | FDPS    | ENST00000356657 | p.Y265F  | c.794  | 0.173005196 | 2.644 | 1 |
| 4092 | FDPS    | ENST00000356657 | p.K323T  | c.968  | 0.094411406 | 3.619 | 1 |
| 4093 | RBM12   | ENST00000359646 | p.A588T  | c.1762 | 0.008602669 | 0     | 1 |
| 4093 | RBM12   | ENST00000359646 | p.H617Y  | c.1849 | 0.008602669 | 6.861 | 1 |
| 4094 | VAV1    | ENST00000602142 | p.E391D  | c.1173 | 0.012065236 | 0     | 1 |
| 4094 | VAV1    | ENST00000602142 | p.D439Y  | c.1315 | 0.012065236 | 6.373 | 1 |
| 4095 | APC     | ENST00000457016 | p.S568N  | c.1703 | 0.008949359 | 0     | 1 |
| 4095 | APC     | ENST00000457016 | p.D605N  | c.1813 | 0.008949359 | 6.804 | 1 |
| 4096 | GLS     | ENST00000320717 | p.H475Y  | c.1423 | 0.020897006 | 0     | 1 |
| 4096 | GLS     | ENST00000320717 | p.K539N  | c.1617 | 0.011541704 | 6.437 | 1 |
| 4096 | GLS     | ENST00000320717 | p.H306L  | c.917  | 0.009355302 | 6.74  | 1 |
| 4097 | PRPSAP1 | ENST00000446526 | p.T339N  | c.1016 | 0.012387252 | 6.335 | 1 |
| 4097 | PRPSAP1 | ENST00000446526 | p.L361I  | c.1081 | 0.012387252 | 0     | 1 |
| 4098 | TLR3    | ENST00000296795 | p.M362I  | c.1086 | 0.011319861 | 6.465 | 1 |
| 4098 | TLR3    | ENST00000296795 | p.L313V  | c.937  | 0.011319861 | 0     | 1 |
| 4099 | AADAT   | ENST00000353187 | p.F6L    | c.18   | 0.029891835 | 8.868 | 1 |
| 4099 | AADAT   | ENST00000353187 | p.T8M    | c.23   | 0.164549634 | 0     | 1 |
| 4099 | AADAT   | ENST00000353187 | p.N130D  | c.388  | 0.151407493 | 2.933 | 1 |
| 4099 | AADAT   | ENST00000353187 | p.P131H  | c.392  | 0.035587761 | 4.99  | 1 |
| 4100 | RGS8    | ENST00000258302 | p.L119V  | c.355  | 0.130760617 | 3.935 | 1 |
| 4100 | RGS8    | ENST00000258302 | p.S157F  | c.470  | 1.065380309 | 0     | 1 |
| 4100 | RGS8    | ENST00000258302 | p.S157Y  | c.470  | 1.065380309 | 0     | 1 |
| 4101 | SAT1    | ENST00000379270 | p.H69R   | c.206  | 0.104748392 | 3.255 | 1 |
| 4101 | SAT1    | ENST00000379270 | p.R19W   | c.55   | 0.104748392 | 0     | 1 |
| 4102 | CR1     | ENST00000367052 | p.I1854M | c.5562 | 0.005912566 | 7.402 | 1 |
| 4102 | CR1     | ENST00000367052 | p.H1902D | c.5704 | 0.005912566 | 0     | 1 |
| 4103 | ASL     | ENST00000304874 | p.H356Y  | c.1066 | 0.020200759 | 7.401 | 1 |
| 4103 | ASL     | ENST00000304874 | p.R146W  | c.436  | 1.005916665 | 0     | 1 |
| 4103 | ASL     | ENST00000304874 | p.R146Q  | c.437  | 1.005916665 | 0     | 1 |

|      |        |                 |         |        |             |       |   |
|------|--------|-----------------|---------|--------|-------------|-------|---|
| 4104 | ACTN2  | ENST00000542672 | p.M675L | c.2023 | 0.028537445 | 5.131 | 1 |
| 4104 | ACTN2  | ENST00000542672 | p.I742T | c.2225 | 0.028537445 | 0     | 1 |
| 4105 | FAIM   | ENST00000338446 | p.W42R  | c.124  | 0.130942016 | 2.933 | 1 |
| 4105 | FAIM   | ENST00000338446 | p.L120F | c.358  | 0.130942016 | 0     | 1 |
| 4106 | NF2    | ENST00000432151 | p.C50Y  | c.149  | 0.007134361 | 0     | 1 |
| 4106 | NF2    | ENST00000432151 | p.P87L  | c.260  | 0.007134361 | 7.131 | 1 |
| 4107 | PNPT1  | ENST00000447944 | p.Q74R  | c.221  | 0.049790006 | 4.328 | 1 |
| 4107 | PNPT1  | ENST00000447944 | p.L168P | c.503  | 0.049790006 | 0     | 1 |
| 4108 | NLGN4X | ENST00000381095 | p.P392H | c.1175 | 0.103163176 | 0     | 1 |
| 4108 | NLGN4X | ENST00000381095 | p.R436W | c.1306 | 0.103163176 | 3.277 | 1 |
| 4109 | KLRC1  | ENST00000359151 | p.F194V | c.580  | 0.002879432 | 8.44  | 1 |
| 4109 | KLRC1  | ENST00000359151 | p.R215Q | c.644  | 0.002879432 | 0     | 1 |
| 4110 | XDH    | ENST00000379416 | p.I403T | c.1208 | 0.013139006 | 6.25  | 1 |
| 4110 | XDH    | ENST00000379416 | p.F299V | c.895  | 0.013139006 | 0     | 1 |
| 4111 | PGC    | ENST00000373025 | p.F74C  | c.221  | 0.007314627 | 7.095 | 1 |
| 4111 | PGC    | ENST00000373025 | p.G223R | c.667  | 0.007314627 | 0     | 1 |
| 4112 | FLT3   | ENST00000380982 | p.A814T | c.2440 | 1.254193668 | 0     | 1 |
| 4112 | FLT3   | ENST00000380982 | p.A814V | c.2441 | 1.254193668 | 0     | 1 |
| 4112 | FLT3   | ENST00000380982 | p.E883K | c.2647 | 1.254193668 | 2.976 | 2 |
| 4113 | FBXW7  | ENST00000603548 | p.G368E | c.1103 | 0.369590608 | 2.436 | 1 |
| 4113 | FBXW7  | ENST00000603548 | p.R658Q | c.1973 | 1.184795304 | 0     | 2 |
| 4114 | IL6    | ENST00000420258 | p.L146P | c.437  | 0.500831846 | 0     | 1 |
| 4114 | IL6    | ENST00000420258 | p.F176L | c.528  | 0.298860828 | 2.081 | 1 |
| 4114 | IL6    | ENST00000420258 | p.Y179F | c.536  | 0.318639104 | 1.966 | 1 |
| 4115 | RAF1   | ENST00000442415 | p.I396L | c.1186 | 0.032374461 | 4.949 | 1 |
| 4115 | RAF1   | ENST00000442415 | p.I439V | c.1315 | 0.032374461 | 0     | 1 |
| 4116 | FCGRT  | ENST00000221466 | p.S39P  | c.115  | 0.020235047 | 5.627 | 1 |
| 4116 | FCGRT  | ENST00000221466 | p.P40A  | c.118  | 0.010096506 | 6.63  | 1 |
| 4116 | FCGRT  | ENST00000221466 | p.F102Y | c.305  | 0.030331553 | 0     | 1 |
| 4117 | TLR3   | ENST00000296795 | p.I422T | c.1265 | 0.011981896 | 6.383 | 1 |
| 4117 | TLR3   | ENST00000296795 | p.L469V | c.1405 | 0.011981896 | 0     | 1 |
| 4118 | GLUD1  | ENST00000277865 | p.Y193C | c.578  | 0.009284243 | 0     | 1 |
| 4118 | GLUD1  | ENST00000277865 | p.R231Q | c.692  | 0.009284243 | 6.751 | 1 |
| 4119 | HCK    | ENST00000375852 | p.A425D | c.1274 | 0.010828671 | 6.529 | 1 |
| 4119 | HCK    | ENST00000375852 | p.P498L | c.1493 | 0.010828671 | 0     | 1 |
| 4120 | PVRL4  | ENST00000368012 | p.P177L | c.530  | 0.017286457 | 0     | 1 |
| 4120 | PVRL4  | ENST00000368012 | p.R200S | c.598  | 0.01110998  | 6.492 | 1 |
| 4120 | PVRL4  | ENST00000368012 | p.A203V | c.608  | 0.006176477 | 7.339 | 1 |
| 4121 | TBRG1  | ENST00000441174 | p.M225L | c.673  | 0.035599481 | 0     | 1 |
| 4121 | TBRG1  | ENST00000441174 | p.E270D | c.810  | 0.035599481 | 4.812 | 1 |
| 4122 | NR1I2  | ENST00000337940 | p.G215R | c.643  | 0.013849714 | 6.174 | 1 |
| 4122 | NR1I2  | ENST00000337940 | p.G256W | c.766  | 0.013849714 | 0     | 1 |
| 4123 | DPYSL5 | ENST00000288699 | p.S252L | c.755  | 0.027316971 | 5.353 | 1 |
| 4123 | DPYSL5 | ENST00000288699 | p.G254R | c.760  | 0.119317203 | 3.102 | 1 |
| 4123 | DPYSL5 | ENST00000288699 | p.Y309S | c.926  | 0.140934875 | 0     | 1 |
| 4124 | ITGB3  | ENST00000559488 | p.R378C | c.1132 | 0.192472978 | 4.875 | 1 |
| 4124 | ITGB3  | ENST00000559488 | p.G418E | c.1253 | 1.038247606 | 0     | 2 |
| 4124 | ITGB3  | ENST00000559488 | p.Q108R | c.323  | 0.146812413 | 7.906 | 1 |
| 4125 | PIK3C3 | ENST00000262039 | p.K404N | c.1212 | 0.103982553 | 3.28  | 1 |

|             |                 |          |             |             |       |   |
|-------------|-----------------|----------|-------------|-------------|-------|---|
| 4125 PIK3C3 | ENST00000262039 | p.E500K  | c.1498      | 0.117768802 | 0     | 1 |
| 4125 PIK3C3 | ENST00000262039 | p.Q645R  | c.1934      | 0.030125212 | 6.638 | 1 |
| 4125 PIK3C3 | ENST00000262039 | p.T675I  | c.2024      | 0.032267428 | 7.709 | 1 |
| 4126 UBE2D3 | ENST00000321805 | p.N7S    | c.20        | 0.352565326 | 3.089 | 1 |
| 4126 UBE2D3 | ENST00000321805 | p.M30I   | c.90        | 2.117521775 | 0     | 3 |
| 4127 XDH    | ENST00000379416 | p.E880K  | c.2638      | 0.028438713 | 5.136 | 1 |
| 4127 XDH    | ENST00000379416 | p.A1079T | c.3235      | 0.028438713 | 0     | 1 |
| 4128 PCK1   | ENST00000319441 | p.R137H  | c.410       | 0.016319224 | 6.114 | 1 |
| 4128 PCK1   | ENST00000319441 | p.S195F  | c.584       | 0.144746073 | 0     | 1 |
| 4128 PCK1   | ENST00000319441 | p.S230F  | c.689       | 0.132189591 | 2.94  | 1 |
| 4129 HTRA2  | ENST00000258080 | p.R360C  | c.1078      | 0.079549683 | 3.652 | 1 |
| 4129 HTRA2  | ENST00000258080 | p.R432Q  | c.1295      | 0.079549683 | 0     | 1 |
| 4130 CTNNB1 | ENST00000349496 | p.G367V  | c.1100      | 0.007031265 | 7.152 | 1 |
| 4130 CTNNB1 | ENST00000349496 | p.L402F  | c.1204      | 0.007031265 | 0     | 1 |
| 4131 PTBP1  | ENST00000356948 | p.T481M  | c.1442      | 0.072644632 | 0     | 1 |
| 4131 PTBP1  | ENST00000356948 | p.A530V  | c.1589      | 0.072644632 | 3.783 | 1 |
| 4132 RPL10  | ENST00000344746 | p.F46C   | c.137       | 0.010301513 | 6.601 | 1 |
| 4132 RPL10  | ENST00000344746 | p.K169N  | c.507       | 0.010301513 | 0     | 1 |
| 4133 PBRM1  | ENST00000296302 | p.E184D  | c.552       | 0.021493195 | 7.746 | 1 |
| 4133 PBRM1  | ENST00000296302 | p.A192T  | c.574       | 0.065145859 | 4.544 | 1 |
| 4133 PBRM1  | ENST00000296302 | p.K231R  | c.692       | 0.013834508 | 8.622 | 1 |
| 4133 PBRM1  | ENST00000296302 | p.I245F  | c.733       | 0.389772408 | 1.761 | 1 |
| 4133 PBRM1  | ENST00000296302 | p.I252R  | c.755       | 0.312956424 | 2.154 | 1 |
| 4133 PBRM1  | ENST00000296302 | p.F280V  | c.838       | 0.569795433 | 0     | 1 |
| 4134 ALPP   | ENST00000392027 | p.D207N  | c.619       | 1.193937602 | 0     | 2 |
| 4134 ALPP   | ENST00000392027 | p.T210M  | c.629       | 0.195255997 | 5.804 | 1 |
| 4134 ALPP   | ENST00000392027 | p.R249S  | c.747       | 0.416589806 | 2.799 | 1 |
| 4134 ALPP   | ENST00000392027 | p.D251Y  | c.751       | 0.104243649 | 4.95  | 1 |
| 4135 EGLN1  | ENST00000366641 | p.R370S  | c.1108      | 0.181872585 | 2.459 | 1 |
| 4135 EGLN1  | ENST00000366641 | p.P317S  | c.949       | 0.181872585 | 0     | 1 |
| 4136 CD38   | ENST00000226279 | p.V80A   | c.239       | 0.017169597 | 5.864 | 1 |
| 4136 CD38   | ENST00000226279 | p.N182S  | c.545       | 0.046836538 | 0     | 1 |
| 4136 CD38   | ENST00000226279 | p.N229K  | c.687       | 0.029666941 | 5.075 | 1 |
| 4137 CARTPT | ENST00000296777 | p.G85S   | c.253       | 0.366021424 | 1.45  | 1 |
| 4137 CARTPT | ENST00000296777 | p.K114N  | c.342       | 0.366021424 | 0     | 1 |
| 4138 HEXB   | ENST00000261416 | p.E384D  | c.1152      | 0.049790006 | 0     | 1 |
| 4138 HEXB   | ENST00000261416 | p.E407Q  | c.1219      | 0.049790006 | 4.328 | 1 |
| 4139 MAPK10 | ENST00000359221 | p.K391T  | c.1172      | 0.126198912 | 3.009 | 1 |
| 4139 MAPK10 | ENST00000359221 | p.K396E  | c.1186      | 0.041301567 | 5.974 | 1 |
| 4139 MAPK10 | ENST00000359221 | p.F139L  | c.415       | 0.14013178  | 0     | 1 |
| 4140 CAMK4  | ENST00000512453 | p.H98R   | c.293       | 0.054825847 | 4.189 | 1 |
| 4140 CAMK4  | ENST00000512453 | p.A151E  | c.452       | 0.054825847 | 0     | 1 |
| 4141 MMP1   | ENST00000315274 | p.V426E  | c.1278_1277 | 0.011125392 | 0     | 1 |
| 4141 MMP1   | ENST00000315274 | p.D285E  | c.855       | 0.011125392 | 6.49  | 1 |
| 4142 CAPN2  | ENST00000295006 | p.C374Y  | c.1121      | 0.007905103 | 6.983 | 1 |
| 4142 CAPN2  | ENST00000295006 | p.T428A  | c.1282      | 0.007905103 | 0     | 1 |
| 4143 STAT1  | ENST00000409465 | p.R405Q  | c.1214      | 0.109196612 | 0     | 1 |
| 4143 STAT1  | ENST00000409465 | p.D165A  | c.494       | 0.109196612 | 3.195 | 1 |
| 4144 GDA    | ENST00000238018 | p.L353F  | c.1057      | 0.047728672 | 4.389 | 1 |



|               |                 |           |           |             |       |   |
|---------------|-----------------|-----------|-----------|-------------|-------|---|
| 4144 GDA      | ENST00000238018 | p.G280S   | c.838     | 0.047728672 | 0     | 1 |
| 4145 SNRNP200 | ENST00000323853 | p.D1795Y  | c.5383    | 0.019586453 | 5.674 | 1 |
| 4145 SNRNP200 | ENST00000323853 | p.E1830D  | c.5490    | 0.019586453 | 0     | 1 |
| 4146 BTK      | ENST00000308731 | p.S289N   | c.866     | 0.048060651 | 5.379 | 1 |
| 4146 BTK      | ENST00000308731 | p.R332H   | c.995     | 1.024030325 | 0     | 2 |
| 4147 IFI16    | ENST00000295809 | p.Q681K   | c.2041    | 0.022797193 | 0     | 1 |
| 4147 IFI16    | ENST00000295809 | p.G748W   | c.2242    | 0.022797193 | 5.455 | 1 |
| 4148 TLR2     | ENST00000260010 | p.Y647H   | c.1939    | 0.099373156 | 0     | 1 |
| 4148 TLR2     | ENST00000260010 | p.R677W   | c.2029    | 0.099373156 | 3.331 | 1 |
| 4149 PARP2    | ENST00000250416 | p.E489K   | c.1465    | 0.190782401 | 3.39  | 1 |
| 4149 PARP2    | ENST00000250416 | p.R570W   | c.1708    | 1.095391201 | 0     | 1 |
| 4149 PARP2    | ENST00000250416 | p.R570P   | c.1709    | 1.095391201 | 0     | 1 |
| 4150 PARP3    | ENST00000398755 | p.H364Y   | c.1090    | 0.147215349 | 0     | 1 |
| 4150 PARP3    | ENST00000398755 | p.E537D   | c.1611    | 0.147215349 | 2.764 | 1 |
| 4151 CCNK     | ENST00000389879 | p.P35F    | c.103_104 | 0.104024842 | 0     | 1 |
| 4151 CCNK     | ENST00000389879 | p.H85Y    | c.253     | 0.104024842 | 3.265 | 1 |
| 4152 MARK3    | ENST00000335102 | p.Q161H   | c.483     | 0.040246301 | 4.635 | 1 |
| 4152 MARK3    | ENST00000335102 | p.M213V   | c.637     | 0.040246301 | 0     | 1 |
| 4153 TYMP     | ENST00000252029 | p.E51K    | c.151     | 0.02686739  | 5.218 | 1 |
| 4153 TYMP     | ENST00000252029 | p.E86Q    | c.256     | 0.02686739  | 0     | 1 |
| 4154 IQSEC1   | ENST00000429247 | p.R812W   | c.2434    | 0.003412394 | 0     | 1 |
| 4154 IQSEC1   | ENST00000429247 | p.F839L   | c.2517    | 0.003412394 | 8.195 | 1 |
| 4155 TATDN3   | ENST00000532324 | p.A38V    | c.113     | 0.005154328 | 0     | 1 |
| 4155 TATDN3   | ENST00000532324 | p.A268V   | c.803     | 0.005154328 | 7.6   | 1 |
| 4156 MYH7     | ENST00000355349 | p.R403W   | c.1207    | 0.035673585 | 4.809 | 1 |
| 4156 MYH7     | ENST00000355349 | p.G607D   | c.1820    | 0.035673585 | 0     | 1 |
| 4157 PAH      | ENST00000553106 | p.E182G   | c.545     | 0.083100444 | 3.589 | 1 |
| 4157 PAH      | ENST00000553106 | p.G272R   | c.814     | 0.083100444 | 0     | 1 |
| 4158 BRPF1    | ENST00000383829 | p.E700K   | c.2098    | 0.120658378 | 0     | 1 |
| 4158 BRPF1    | ENST00000383829 | p.R739W   | c.2215    | 0.120658378 | 3.051 | 1 |
| 4159 ADRB2    | ENST00000305988 | p.T118M   | c.353     | 0.009978232 | 0     | 1 |
| 4159 ADRB2    | ENST00000305988 | p.S262F   | c.785     | 0.009978232 | 6.647 | 1 |
| 4160 C9orf89  | ENST00000466409 | p.A83G    | c.248_249 | 0.186080657 | 2.426 | 1 |
| 4160 C9orf89  | ENST00000466409 | p.Q12E    | c.34      | 0.186080657 | 0     | 1 |
| 4161 EGLN1    | ENST00000366641 | p.R344Q   | c.1031    | 0.057871626 | 0     | 1 |
| 4161 EGLN1    | ENST00000366641 | p.Y384H   | c.1150    | 0.057871626 | 4.111 | 1 |
| 4162 TTN      | ENST00000589042 | p.S24636F | c.73907   | 0.084377374 | 0     | 1 |
| 4162 TTN      | ENST00000589042 | p.T24672N | c.74015   | 0.084377374 | 3.567 | 1 |
| 4163 PPFIA2   | ENST00000549396 | p.Q1036H  | c.3108    | 0.008021012 | 6.962 | 1 |
| 4163 PPFIA2   | ENST00000549396 | p.K1064E  | c.3190    | 0.008021012 | 0     | 1 |
| 4164 TIMP2    | ENST00000536189 | p.S17F    | c.51_50   | 0.006872258 | 7.185 | 1 |
| 4165 RIMBP2   | ENST00000261655 | p.P193T   | c.577     | 0.242658617 | 2.043 | 1 |
| 4165 RIMBP2   | ENST00000261655 | p.L216I   | c.646     | 0.242658617 | 0     | 1 |
| 4166 SEC24B   | ENST00000504968 | p.L871V   | c.2611    | 0.040414029 | 4.629 | 1 |
| 4166 SEC24B   | ENST00000504968 | p.R1128C  | c.3382    | 0.040414029 | 0     | 1 |
| 4167 TRNT1    | ENST00000251607 | p.M89I    | c.267     | 0.004391715 | 0     | 1 |
| 4167 TRNT1    | ENST00000251607 | p.A113T   | c.337     | 0.004391715 | 7.831 | 1 |
| 4168 CFH      | ENST00000367429 | p.G1107E  | c.3320    | 1.20620872  | 0     | 2 |
| 4168 CFH      | ENST00000367429 | p.K1108N  | c.3324    | 0.157673776 | 5.554 | 1 |

|               |                 |          |             |             |       |   |
|---------------|-----------------|----------|-------------|-------------|-------|---|
| 4168 CFH      | ENST00000367429 | p.G1155R | c.3463      | 0.484950089 | 2.435 | 1 |
| 4169 USP8     | ENST00000307179 | p.A775T  | c.2323      | 0.030522142 | 5.034 | 1 |
| 4169 USP8     | ENST00000307179 | p.G840E  | c.2519      | 0.030522142 | 0     | 1 |
| 4170 TBC1D22A | ENST00000337137 | p.V396M  | c.1186      | 0.057951909 | 4.109 | 1 |
| 4170 TBC1D22A | ENST00000337137 | p.A458T  | c.1372      | 0.061380901 | 0     | 1 |
| 4170 TBC1D22A | ENST00000337137 | p.R503H  | c.1508      | 0.003428991 | 8.188 | 1 |
| 4171 SERPINE2 | ENST00000409304 | p.L173R  | c.518       | 0.025755065 | 5.279 | 1 |
| 4171 SERPINE2 | ENST00000409304 | p.D303H  | c.907       | 0.025755065 | 0     | 1 |
| 4172 PDE1C    | ENST00000396193 | p.E374K  | c.1120      | 0.031752192 | 0     | 1 |
| 4172 PDE1C    | ENST00000396193 | p.A268V  | c.803       | 0.031752192 | 4.977 | 1 |
| 4173 IDE      | ENST00000265986 | p.P548S  | c.1642      | 0.024708283 | 0     | 1 |
| 4173 IDE      | ENST00000265986 | p.E903K  | c.2707      | 0.013917077 | 6.167 | 1 |
| 4173 IDE      | ENST00000265986 | p.W908F  | c.2724_2723 | 0.010791207 | 6.534 | 1 |
| 4174 LMAN1    | ENST00000251047 | p.L123P  | c.368       | 0.135578966 | 0     | 1 |
| 4174 LMAN1    | ENST00000251047 | p.F150V  | c.448       | 0.102648836 | 3.336 | 1 |
| 4174 LMAN1    | ENST00000251047 | p.D152Y  | c.454       | 0.040169099 | 4.774 | 1 |
| 4175 ARL5B    | ENST00000377275 | p.L63F   | c.187       | 0.096321389 | 0     | 1 |
| 4175 ARL5B    | ENST00000377275 | p.I20V   | c.58        | 0.096321389 | 3.376 | 1 |
| 4176 ANPEP    | ENST00000300060 | p.A294V  | c.881       | 0.016299822 | 5.939 | 1 |
| 4176 ANPEP    | ENST00000300060 | p.T321M  | c.962       | 0.016299822 | 0     | 1 |
| 4177 CSF3R    | ENST00000440588 | p.P34S   | c.100_99    | 0.130670013 | 0     | 1 |
| 4177 CSF3R    | ENST00000440588 | p.R118P  | c.353       | 0.130670013 | 2.936 | 1 |
| 4178 VAT1L    | ENST00000302536 | p.T212A  | c.634       | 0.004756117 | 0     | 1 |
| 4178 VAT1L    | ENST00000302536 | p.D234N  | c.700       | 0.004756117 | 7.716 | 1 |
| 4179 ME1      | ENST00000369705 | p.S455F  | c.1364      | 0.071629559 | 0     | 1 |
| 4179 ME1      | ENST00000369705 | p.I506F  | c.1516      | 0.057435468 | 4.225 | 1 |
| 4179 ME1      | ENST00000369705 | p.D508N  | c.1522      | 0.030497546 | 9.233 | 1 |
| 4179 ME1      | ENST00000369705 | p.D268N  | c.802       | 0.016493027 | 5.922 | 1 |
| 4180 PPIL2    | ENST00000335025 | p.R363C  | c.1087      | 0.052994998 | 4.238 | 1 |
| 4180 PPIL2    | ENST00000335025 | p.R385H  | c.1154      | 0.052994998 | 0     | 1 |
| 4181 EXOSC2   | ENST00000372358 | p.S175F  | c.524       | 0.00587987  | 7.41  | 1 |
| 4181 EXOSC2   | ENST00000372358 | p.L251Q  | c.752       | 0.00587987  | 0     | 1 |
| 4182 GSS      | ENST00000216951 | p.M398T  | c.1193      | 0.026205256 | 5.254 | 1 |
| 4182 GSS      | ENST00000216951 | p.E144K  | c.430       | 0.026205256 | 0     | 1 |
| 4183 RANBP2   | ENST00000283195 | p.R1203C | c.3607      | 1.010040675 | 0     | 2 |
| 4183 RANBP2   | ENST00000283195 | p.R1236L | c.3707      | 0.029586992 | 6.638 | 1 |
| 4184 AK4      | ENST00000327299 | p.I110M  | c.330       | 0.076786686 | 0     | 1 |
| 4184 AK4      | ENST00000327299 | p.V206I  | c.616       | 0.076786686 | 3.703 | 1 |
| 4185 TDRD3    | ENST00000196169 | p.W556L  | c.1667      | 0.006982697 | 0     | 1 |
| 4185 TDRD3    | ENST00000196169 | p.M585I  | c.1755      | 0.006982697 | 7.162 | 1 |
| 4186 FDPS     | ENST00000356657 | p.V190M  | c.568       | 0.089560103 | 3.481 | 1 |
| 4186 FDPS     | ENST00000356657 | p.F272L  | c.816       | 0.089560103 | 0     | 1 |
| 4187 NEO1     | ENST00000339362 | p.P857L  | c.2570      | 0.055745532 | 4.165 | 1 |
| 4187 NEO1     | ENST00000339362 | p.T940I  | c.2819      | 0.055745532 | 0     | 1 |
| 4188 HGF      | ENST00000222390 | p.A661D  | c.1982      | 0.033244402 | 0     | 1 |
| 4188 HGF      | ENST00000222390 | p.P700T  | c.2098      | 0.01286861  | 6.28  | 1 |
| 4188 HGF      | ENST00000222390 | p.R702H  | c.2105      | 0.020375793 | 5.617 | 1 |
| 4189 DGUOK    | ENST00000264093 | p.S42F   | c.125       | 0.127008768 | 0     | 1 |
| 4189 DGUOK    | ENST00000264093 | p.I190M  | c.570       | 0.127008768 | 2.977 | 1 |

|              |                 |           |             |             |       |   |
|--------------|-----------------|-----------|-------------|-------------|-------|---|
| 4190 TTN     | ENST00000589042 | p.Y33724C | c.101171    | 0.032803646 | 4.93  | 1 |
| 4190 TTN     | ENST00000589042 | p.E33765K | c.101293    | 0.032803646 | 0     | 1 |
| 4191 FGF13   | ENST00000370603 | p.G101D   | c.302       | 0.033008926 | 4.921 | 1 |
| 4191 FGF13   | ENST00000370603 | p.E188D   | c.564       | 0.033008926 | 0     | 1 |
| 4192 LRRC4   | ENST00000249363 | p.E160K   | c.478       | 1.141708677 | 0     | 2 |
| 4192 LRRC4   | ENST00000249363 | p.E185V   | c.554       | 0.283417353 | 2.819 | 1 |
| 4193 BUB1    | ENST00000302759 | p.L820V   | c.2458      | 0.056016669 | 0     | 1 |
| 4193 BUB1    | ENST00000302759 | p.V863L   | c.2587      | 0.056016669 | 4.158 | 1 |
| 4194 DNMT1   | ENST00000359526 | p.P867S   | c.2599      | 0.090071211 | 3.522 | 1 |
| 4194 DNMT1   | ENST00000359526 | p.D875N   | c.2623      | 0.037718582 | 4.849 | 1 |
| 4194 DNMT1   | ENST00000359526 | p.R1305H  | c.3914      | 0.121748806 | 0     | 1 |
| 4195 TGS1    | ENST00000260129 | p.R714T   | c.2141      | 0.018945513 | 5.722 | 1 |
| 4195 TGS1    | ENST00000260129 | p.K756R   | c.2267      | 0.018945513 | 0     | 1 |
| 4196 SNX9    | ENST00000392185 | p.G429C   | c.1285      | 0.007442484 | 0     | 1 |
| 4196 SNX9    | ENST00000392185 | p.V478L   | c.1432      | 0.007442484 | 7.07  | 1 |
| 4197 PDHX    | ENST00000227868 | p.K112T   | c.335       | 0.002450004 | 0     | 1 |
| 4197 PDHX    | ENST00000227868 | p.D137H   | c.409       | 0.002450004 | 8.673 | 1 |
| 4198 CYP19A1 | ENST00000559878 | p.R457Q   | c.1370      | 0.128964927 | 3.094 | 1 |
| 4198 CYP19A1 | ENST00000559878 | p.H459Q   | c.1377      | 0.113030024 | 3.305 | 1 |
| 4198 CYP19A1 | ENST00000559878 | p.R495K   | c.1484      | 0.218295458 | 0     | 1 |
| 4199 HK1     | ENST00000448642 | p.R574H   | c.1721      | 0.025582518 | 5.807 | 1 |
| 4199 HK1     | ENST00000448642 | p.A596T   | c.1786      | 0.104779591 | 3.365 | 1 |
| 4199 HK1     | ENST00000448642 | p.R318W   | c.952       | 0.114920146 | 0     | 1 |
| 4200 MME     | ENST00000360490 | p.A567V   | c.1700      | 0.420772302 | 2.318 | 1 |
| 4200 MME     | ENST00000360490 | p.G641R   | c.1921      | 1.298686306 | 0     | 1 |
| 4200 MME     | ENST00000360490 | p.G641K   | c.1921_1922 | 1.298686306 | 0     | 1 |
| 4200 MME     | ENST00000360490 | p.R293Q   | c.878       | 0.215963748 | 3.349 | 1 |
| 4202 S100A12 | ENST00000368737 | p.A81T    | c.241       | 0.067968024 | 3.879 | 1 |
| 4202 S100A12 | ENST00000368737 | p.G10E    | c.29        | 0.067968024 | 0     | 1 |
| 4203 TEK     | ENST00000380036 | p.A63T    | c.187       | 0.010517969 | 0     | 1 |
| 4203 TEK     | ENST00000380036 | p.S160F   | c.479       | 0.010517969 | 6.571 | 1 |
| 4204 STYX    | ENST00000442123 | p.L117I   | c.349       | 0.06237017  | 0     | 1 |
| 4204 STYX    | ENST00000442123 | p.M29I    | c.87        | 0.06237017  | 4.003 | 1 |
| 4205 P2RY4   | ENST00000374519 | p.R112H   | c.335       | 1.060037179 | 0     | 2 |
| 4205 P2RY4   | ENST00000374519 | p.R265H   | c.794       | 0.120074358 | 4.058 | 1 |
| 4206 TAF5    | ENST00000369839 | p.G209R   | c.625       | 0.004866162 | 7.683 | 1 |
| 4206 TAF5    | ENST00000369839 | p.F240V   | c.718       | 0.003412394 | 8.195 | 1 |
| 4206 TAF5    | ENST00000369839 | p.I329T   | c.986       | 0.008278556 | 0     | 1 |
| 4207 KCNA1   | ENST00000382545 | p.E348K   | c.1042      | 0.05969109  | 4.094 | 1 |
| 4207 KCNA1   | ENST00000382545 | p.P360S   | c.1078      | 0.020490511 | 5.691 | 1 |
| 4207 KCNA1   | ENST00000382545 | p.K386N   | c.1158      | 0.077914601 | 0     | 1 |
| 4208 KEAP1   | ENST00000171111 | p.V369L   | c.1105      | 1.086930966 | 0     | 1 |
| 4208 KEAP1   | ENST00000171111 | p.V369M   | c.1105      | 1.086930966 | 0     | 1 |
| 4208 KEAP1   | ENST00000171111 | p.A607P   | c.1819      | 0.244164712 | 3.64  | 1 |
| 4208 KEAP1   | ENST00000171111 | p.I328F   | c.982       | 0.09717017  | 7.218 | 1 |
| 4209 CPS1    | ENST00000430249 | p.V1441A  | c.4322      | 0.122257934 | 3.032 | 1 |
| 4209 CPS1    | ENST00000430249 | p.P1468R  | c.4403      | 0.122257934 | 0     | 1 |
| 4210 BACH1   | ENST00000286800 | p.D35Y    | c.103       | 0.004117545 | 0     | 1 |
| 4210 BACH1   | ENST00000286800 | p.I63K    | c.188_189   | 0.004117545 | 7.924 | 1 |

|              |                 |         |           |             |       |   |
|--------------|-----------------|---------|-----------|-------------|-------|---|
| 4212 PRKCH   | ENST00000332981 | p.E490G | c.1469    | 0.115023456 | 0     | 1 |
| 4212 PRKCH   | ENST00000332981 | p.P629S | c.1885    | 0.115023456 | 3.12  | 1 |
| 4213 METAP1  | ENST00000296411 | p.L362R | c.1085    | 0.110792855 | 4.29  | 1 |
| 4213 METAP1  | ENST00000296411 | p.E369Q | c.1105    | 0.343268912 | 2.579 | 1 |
| 4213 METAP1  | ENST00000296411 | p.R140Q | c.419     | 1.218475786 | 0     | 2 |
| 4214 RUVBL2  | ENST00000595090 | p.E136D | c.408     | 0.012770865 | 0     | 1 |
| 4214 RUVBL2  | ENST00000595090 | p.K201R | c.602     | 0.012770865 | 6.291 | 1 |
| 4215 UPF1    | ENST00000599848 | p.R708H | c.2123    | 0.097869287 | 0     | 1 |
| 4215 UPF1    | ENST00000599848 | p.G745A | c.2234    | 0.097869287 | 3.353 | 1 |
| 4216 AGT     | ENST00000366667 | p.E338K | c.1012    | 0.011981896 | 6.383 | 1 |
| 4216 AGT     | ENST00000366667 | p.K370N | c.1110    | 0.011981896 | 0     | 1 |
| 4217 LCMT1   | ENST00000399069 | p.L172F | c.514     | 0.056798632 | 0     | 1 |
| 4217 LCMT1   | ENST00000399069 | p.L212I | c.634     | 0.056798632 | 4.138 | 1 |
| 4218 NR1H4   | ENST00000551379 | p.R367Q | c.1100    | 0.065016643 | 4.018 | 1 |
| 4218 NR1H4   | ENST00000551379 | p.D472Y | c.1414    | 0.105224834 | 4.229 | 1 |
| 4218 NR1H4   | ENST00000551379 | p.F298V | c.892     | 0.11683775  | 0     | 1 |
| 4218 NR1H4   | ENST00000551379 | p.T302M | c.905     | 0.035278985 | 9.129 | 1 |
| 4219 C6      | ENST00000263413 | p.R145C | c.433     | 4.015437262 | 0     | 3 |
| 4219 C6      | ENST00000263413 | p.R145H | c.434     | 4.015437262 | 0     | 1 |
| 4219 C6      | ENST00000263413 | p.R145P | c.434     | 4.015437262 | 0     | 1 |
| 4219 C6      | ENST00000263413 | p.D166Y | c.496     | 0.046453403 | 6.75  | 1 |
| 4219 C6      | ENST00000263413 | p.E170K | c.508     | 0.030732908 | 7.346 | 1 |
| 4220 DDC     | ENST00000444124 | p.R160Q | c.480_479 | 0.041550222 | 0     | 1 |
| 4220 DDC     | ENST00000444124 | p.G203A | c.608     | 0.041550222 | 4.589 | 1 |
| 4221 PRMT3   | ENST00000331079 | p.G356V | c.1067    | 0.024281477 | 0     | 1 |
| 4221 PRMT3   | ENST00000331079 | p.V325A | c.974     | 0.024281477 | 5.364 | 1 |
| 4222 CPN1    | ENST00000370418 | p.E89K  | c.265     | 1.027911433 | 0     | 2 |
| 4222 CPN1    | ENST00000370418 | p.F314L | c.942     | 0.055822866 | 5.163 | 1 |
| 4223 BMX     | ENST00000348343 | p.W410L | c.1229    | 0.141381405 | 5.215 | 1 |
| 4223 BMX     | ENST00000348343 | p.F457L | c.1371    | 1.029280044 | 0     | 2 |
| 4223 BMX     | ENST00000348343 | p.F475L | c.1425    | 0.092248223 | 8.729 | 1 |
| 4224 HSD17B4 | ENST00000504811 | p.P441S | c.1321    | 0.059959384 | 7.334 | 1 |
| 4224 HSD17B4 | ENST00000504811 | p.L478F | c.1432    | 1.006197921 | 0     | 1 |
| 4224 HSD17B4 | ENST00000504811 | p.L478P | c.1433    | 1.006197921 | 0     | 1 |
| 4225 NAT1    | ENST00000535084 | p.R64Q  | c.191     | 0.135653671 | 2.882 | 1 |
| 4225 NAT1    | ENST00000535084 | p.R9I   | c.26      | 0.135653671 | 0     | 1 |
| 4226 ACOT7   | ENST00000377855 | p.I278V | c.832     | 0.024637266 | 5.447 | 1 |
| 4226 ACOT7   | ENST00000377855 | p.H281Y | c.841     | 0.076452045 | 3.742 | 1 |
| 4226 ACOT7   | ENST00000377855 | p.A326T | c.976     | 0.097662696 | 0     | 1 |
| 4227 IGHMBP2 | ENST00000255078 | p.R56H  | c.167     | 0.136604599 | 4.21  | 1 |
| 4227 IGHMBP2 | ENST00000255078 | p.R286W | c.856     | 1.055575557 | 0     | 2 |
| 4227 IGHMBP2 | ENST00000255078 | p.I296V | c.886     | 0.031621406 | 9.341 | 1 |
| 4229 TOP3A   | ENST00000321105 | p.D51E  | c.153     | 0.007583082 | 7.043 | 1 |
| 4229 TOP3A   | ENST00000321105 | p.V186I | c.556     | 0.007583082 | 0     | 1 |
| 4230 PKLR    | ENST00000342741 | p.R486Q | c.1457    | 0.019545767 | 5.677 | 1 |
| 4230 PKLR    | ENST00000342741 | p.R510Q | c.1529    | 0.019545767 | 0     | 1 |
| 4231 PCYT2   | ENST00000538721 | p.I234M | c.702     | 0.057114466 | 4.13  | 1 |
| 4231 PCYT2   | ENST00000538721 | p.P261N | c.782_781 | 0.057114466 | 0     | 1 |
| 4232 SKP1    | ENST00000517625 | p.L47V  | c.139     | 0.135831677 | 0     | 1 |

|              |                 |           |             |             |       |   |
|--------------|-----------------|-----------|-------------|-------------|-------|---|
| 4232 SKP1    | ENST00000517625 | p.K80R    | c.239       | 0.084512875 | 3.643 | 1 |
| 4232 SKP1    | ENST00000517625 | p.D84N    | c.250       | 0.06024957  | 4.164 | 1 |
| 4233 FAP     | ENST00000188790 | p.P469S   | c.1405      | 0.011630041 | 6.426 | 1 |
| 4233 FAP     | ENST00000188790 | p.R550T   | c.1649      | 0.011630041 | 0     | 1 |
| 4234 KCNH2   | ENST00000262186 | p.R4Q     | c.11        | 0.166893538 | 2.583 | 1 |
| 4234 KCNH2   | ENST00000262186 | p.E118K   | c.352       | 0.166893538 | 0     | 1 |
| 4235 THYN1   | ENST00000392595 | p.A124T   | c.370       | 0.078617811 | 3.669 | 1 |
| 4235 THYN1   | ENST00000392595 | p.M168T   | c.503       | 0.078617811 | 0     | 1 |
| 4236 USP21   | ENST00000289865 | p.L507F   | c.1519      | 0.063636575 | 0     | 1 |
| 4236 USP21   | ENST00000289865 | p.W529C   | c.1587      | 0.063636575 | 3.974 | 1 |
| 4237 MGAM    | ENST00000475668 | p.R115H   | c.344       | 0.018363693 | 5.767 | 1 |
| 4237 MGAM    | ENST00000475668 | p.P162S   | c.484       | 0.018363693 | 0     | 1 |
| 4238 RPS6KA1 | ENST00000531382 | p.E632K   | c.1894      | 0.016277241 | 5.941 | 1 |
| 4238 RPS6KA1 | ENST00000531382 | p.A713T   | c.2137      | 0.016277241 | 0     | 1 |
| 4239 CAB39L  | ENST00000409308 | p.F101C   | c.302       | 0.01251711  | 7.468 | 1 |
| 4239 CAB39L  | ENST00000409308 | p.R141S   | c.421       | 1.005648173 | 0     | 1 |
| 4239 CAB39L  | ENST00000409308 | p.R141H   | c.422       | 1.005648173 | 0     | 1 |
| 4240 EPHA4   | ENST00000281821 | p.R492W   | c.1474      | 1.019956465 | 0     | 1 |
| 4240 EPHA4   | ENST00000281821 | p.R492Q   | c.1475      | 1.019956465 | 0     | 1 |
| 4240 EPHA4   | ENST00000281821 | p.R514Q   | c.1541      | 0.03991293  | 5.647 | 1 |
| 4241 CASP6   | ENST00000265164 | p.A34T    | c.100       | 1.036757014 | 0     | 2 |
| 4241 CASP6   | ENST00000265164 | p.E247K   | c.739       | 0.051796557 | 5.271 | 1 |
| 4241 CASP6   | ENST00000265164 | p.L282V   | c.844       | 0.030704128 | 6.525 | 1 |
| 4242 DDB1    | ENST00000301764 | p.R414W   | c.1240      | 0.056641371 | 4.142 | 1 |
| 4242 DDB1    | ENST00000301764 | p.R642C   | c.1924      | 0.015909144 | 5.974 | 1 |
| 4242 DDB1    | ENST00000301764 | p.D685N   | c.2053      | 0.072550515 | 0     | 1 |
| 4243 BLM     | ENST00000355112 | p.MG951IW | c.2853_2854 | 0.108592773 | 0     | 1 |
| 4243 BLM     | ENST00000355112 | p.R979T   | c.2936      | 0.108592773 | 3.203 | 1 |
| 4244 OBSCN   | ENST00000570156 | p.A3906S  | c.11716     | 0.284993318 | 0     | 1 |
| 4244 OBSCN   | ENST00000570156 | p.Q3927H  | c.11781     | 0.284993318 | 1.811 | 1 |
| 4245 CHN2    | ENST00000539406 | p.I371K   | c.1112      | 0.045689295 | 4.452 | 1 |
| 4245 CHN2    | ENST00000539406 | p.R479Q   | c.1436      | 0.045689295 | 0     | 1 |
| 4246 ACAD11  | ENST00000264990 | p.A512S   | c.1534      | 0.006601456 | 0     | 1 |
| 4246 ACAD11  | ENST00000264990 | p.K662N   | c.1986      | 0.006601456 | 7.243 | 1 |
| 4247 MYO10   | ENST00000513610 | p.E1824Q  | c.5470      | 0.021300041 | 0     | 1 |
| 4247 MYO10   | ENST00000513610 | p.S1856F  | c.5567      | 0.021300041 | 5.553 | 1 |
| 4248 S100A13 | ENST00000368699 | p.L56F    | c.166       | 0.222673225 | 2.167 | 1 |
| 4248 S100A13 | ENST00000368699 | p.E86G    | c.257       | 0.222673225 | 0     | 1 |
| 4249 UBE2F   | ENST00000272930 | p.Y75C    | c.224       | 0.024877753 | 5.329 | 1 |
| 4249 UBE2F   | ENST00000272930 | p.K97T    | c.290       | 0.024877753 | 0     | 1 |
| 4250 AHCY    | ENST00000217426 | p.I241T   | c.722       | 0.011063871 | 6.498 | 1 |
| 4250 AHCY    | ENST00000217426 | p.M262I   | c.786       | 0.011063871 | 0     | 1 |
| 4251 CNOT4   | ENST00000541284 | p.P54H    | c.161       | 0.297920644 | 1.747 | 1 |
| 4251 CNOT4   | ENST00000541284 | p.L16V    | c.46        | 0.297920644 | 0     | 1 |
| 4252 ZWILCH  | ENST00000307897 | p.Q375L   | c.1124      | 0.006341325 | 0     | 1 |
| 4252 ZWILCH  | ENST00000307897 | p.Q300H   | c.900       | 0.006341325 | 7.301 | 1 |
| 4253 ANXA6   | ENST00000354546 | p.R499K   | c.1496      | 0.038222822 | 4.84  | 1 |
| 4253 ANXA6   | ENST00000354546 | p.S503Y   | c.1508      | 0.098039884 | 3.4   | 1 |
| 4253 ANXA6   | ENST00000354546 | p.A592V   | c.1775      | 0.129647508 | 0     | 1 |

|              |                 |          |        |             |       |   |
|--------------|-----------------|----------|--------|-------------|-------|---|
| 4254 CYP2A13 | ENST00000330436 | p.R129G  | c.385  | 0.01081367  | 0     | 1 |
| 4254 CYP2A13 | ENST00000330436 | p.F286L  | c.858  | 0.01081367  | 6.531 | 1 |
| 4255 TSTA3   | ENST00000425753 | p.H196R  | c.587  | 0.01167851  | 6.42  | 1 |
| 4255 TSTA3   | ENST00000425753 | p.V259M  | c.775  | 0.01167851  | 0     | 1 |
| 4256 EPHX2   | ENST00000521400 | p.N124Y  | c.370  | 0.133600749 | 0     | 1 |
| 4256 EPHX2   | ENST00000521400 | p.S153L  | c.458  | 0.133600749 | 2.904 | 1 |
| 4257 JAK3    | ENST00000458235 | p.R866M  | c.2597 | 0.0093294   | 0     | 1 |
| 4257 JAK3    | ENST00000458235 | p.G969V  | c.2906 | 0.0093294   | 6.744 | 1 |
| 4258 CAMK2D  | ENST00000511664 | p.P178S  | c.532  | 0.100167154 | 3.49  | 1 |
| 4258 CAMK2D  | ENST00000511664 | p.G179E  | c.536  | 0.136597985 | 2.995 | 1 |
| 4258 CAMK2D  | ENST00000511664 | p.I304T  | c.911  | 0.214437106 | 0     | 1 |
| 4259 ATG4B   | ENST00000404914 | p.I82M   | c.246  | 1.040302133 | 0     | 2 |
| 4259 ATG4B   | ENST00000404914 | p.A318T  | c.952  | 0.080604266 | 4.633 | 1 |
| 4260 FADD    | ENST00000301838 | p.R114S  | c.342  | 0.005013382 | 0     | 1 |
| 4260 FADD    | ENST00000301838 | p.L137Q  | c.410  | 0.005013382 | 7.64  | 1 |
| 4261 NOTCH1  | ENST00000277541 | p.A2036V | c.6107 | 0.218393224 | 3.195 | 1 |
| 4261 NOTCH1  | ENST00000277541 | p.P2064L | c.6191 | 1.109196612 | 0     | 2 |
| 4262 CEACAM5 | ENST00000221992 | p.V273G  | c.818  | 0.018736561 | 5.738 | 1 |
| 4262 CEACAM5 | ENST00000221992 | p.S296F  | c.887  | 0.018736561 | 0     | 1 |
| 4263 NPY1R   | ENST00000296533 | p.I128M  | c.384  | 0.172898829 | 3.532 | 1 |
| 4263 NPY1R   | ENST00000296533 | p.I227L  | c.679  | 1.086449414 | 0     | 1 |
| 4263 NPY1R   | ENST00000296533 | p.I227T  | c.680  | 1.086449414 | 0     | 1 |
| 4264 CCDC101 | ENST00000317058 | p.R165W  | c.493  | 0.130942016 | 0     | 1 |
| 4264 CCDC101 | ENST00000317058 | p.R208H  | c.623  | 0.130942016 | 2.933 | 1 |
| 4265 HTRA1   | ENST00000368984 | p.R190C  | c.568  | 0.110644221 | 4.176 | 1 |
| 4265 HTRA1   | ENST00000368984 | p.R227Q  | c.680  | 1.05532211  | 0     | 2 |
| 4266 SNAI1   | ENST00000244050 | p.H212Q  | c.636  | 0.002584319 | 8.596 | 1 |
| 4266 SNAI1   | ENST00000244050 | p.R247P  | c.740  | 0.002584319 | 0     | 1 |
| 4267 SRSF1   | ENST00000584773 | p.R51C   | c.151  | 0.033679161 | 4.892 | 1 |
| 4267 SRSF1   | ENST00000584773 | p.D80G   | c.239  | 0.033679161 | 0     | 1 |
| 4268 SULT1C2 | ENST00000437390 | p.P131L  | c.392  | 0.005086891 | 7.619 | 1 |
| 4268 SULT1C2 | ENST00000437390 | p.H201Y  | c.601  | 0.005086891 | 0     | 1 |
| 4269 CAMK1   | ENST00000256460 | p.L212P  | c.635  | 0.080653043 | 0     | 1 |
| 4269 CAMK1   | ENST00000256460 | p.F252L  | c.756  | 0.012967103 | 6.269 | 1 |
| 4269 CAMK1   | ENST00000256460 | p.I286V  | c.856  | 0.06768594  | 3.885 | 1 |
| 4270 CHI3L1  | ENST00000255409 | p.S111F  | c.332  | 0.006963363 | 0     | 1 |
| 4270 CHI3L1  | ENST00000255409 | p.L153P  | c.458  | 0.006963363 | 7.166 | 1 |
| 4271 CTNNA1  | ENST00000302763 | p.E432Q  | c.1294 | 0.187363909 | 0     | 1 |
| 4271 CTNNA1  | ENST00000302763 | p.S322L  | c.965  | 0.176005707 | 2.526 | 1 |
| 4271 CTNNA1  | ENST00000302763 | p.T325M  | c.974  | 0.016130831 | 6.185 | 1 |
| 4272 TDG     | ENST00000392872 | p.D133Y  | c.397  | 0.030101934 | 0     | 1 |
| 4272 TDG     | ENST00000392872 | p.A227E  | c.680  | 0.030101934 | 5.054 | 1 |
| 4273 STK32A  | ENST00000398523 | p.K148E  | c.442  | 0.003757529 | 0     | 1 |
| 4273 STK32A  | ENST00000398523 | p.S227F  | c.680  | 0.003757529 | 8.056 | 1 |
| 4274 GRM5    | ENST00000305447 | p.L268M  | c.802  | 0.019143521 | 5.707 | 1 |
| 4274 GRM5    | ENST00000305447 | p.A271T  | c.811  | 0.017122059 | 5.868 | 1 |
| 4274 GRM5    | ENST00000305447 | p.E298A  | c.893  | 0.03626558  | 0     | 1 |
| 4275 DNPEP   | ENST00000523282 | p.R123W  | c.367  | 0.090999347 | 0     | 1 |
| 4275 DNPEP   | ENST00000523282 | p.R233W  | c.697  | 0.090999347 | 3.458 | 1 |

|               |                       |          |        |             |       |   |
|---------------|-----------------------|----------|--------|-------------|-------|---|
| 4276 NPC1L1   | ENST00000289547       | p.L99P   | c.296  | 0.083100444 | 3.589 | 1 |
| 4276 NPC1L1   | ENST00000289547       | p.T128M  | c.383  | 0.083100444 | 0     | 1 |
| 4277 LTA      | ENST00000418386       | p.L99I   | c.295  | 0.014802657 | 6.078 | 1 |
| 4277 LTA      | ENST00000418386       | p.G178V  | c.533  | 0.014802657 | 0     | 1 |
| 4278 DESI1    | ENST00000263256       | p.H44Y   | c.130  | 0.100272646 | 0     | 1 |
| 4278 DESI1    | ENST00000263256       | p.T80R   | c.239  | 0.100272646 | 3.318 | 1 |
| 4279 CBLB     | ENST00000264122       | p.I77V   | c.229  | 0.022143084 | 5.497 | 1 |
| 4279 CBLB     | ENST00000264122       | p.H152L  | c.455  | 0.031648728 | 0     | 1 |
| 4279 CBLB     | ENST00000264122       | p.D221Y  | c.661  | 0.009505643 | 6.717 | 1 |
| 4280 FIGNL1   | ENST00000419119       | p.S466Y  | c.1397 | 0.065924681 | 5.508 | 1 |
| 4280 FIGNL1   | ENST00000419119       | p.E501K  | c.1501 | 2.021974894 | 0     | 2 |
| 4280 FIGNL1   | ENST00000419119       | p.E501G  | c.1502 | 2.021974894 | 0     | 1 |
| 4281 ARL6     | ENST00000493990       | p.F127L  | c.381  | 0.1077327   | 0     | 1 |
| 4281 ARL6     | ENST00000493990       | p.I159L  | c.475  | 0.098141015 | 3.349 | 1 |
| 4281 ARL6     | ENST00000493990       | p.S162G  | c.484  | 0.009591685 | 6.704 | 1 |
| 4282 CCR5     | ENST00000292303       | p.T343I  | c.1028 | 0.019998006 | 0     | 1 |
| 4282 CCR5     | ENST00000292303       | p.L222F  | c.664  | 0.019998006 | 5.644 | 1 |
| 4283 TGM2     | ENST00000361475       | p.R512H  | c.1535 | 0.191843262 | 3.382 | 1 |
| 4283 TGM2     | ENST00000361475       | p.R564W  | c.1690 | 1.095921631 | 0     | 1 |
| 4283 TGM2     | ENST00000361475       | p.R564Q  | c.1691 | 1.095921631 | 0     | 1 |
| 4284 ZAP70    | ENST00000264972       | p.L371M  | c.1111 | 0.125879436 | 3.132 | 1 |
| 4284 ZAP70    | ENST00000264972       | p.T380K  | c.1139 | 0.115330082 | 3.272 | 1 |
| 4284 ZAP70    | ENST00000264972       | p.L410F  | c.1228 | 0.217592019 | 0     | 1 |
| 4285 MAPK7    | ENST00000308406       | p.R369H  | c.1106 | 0.00805444  | 6.956 | 1 |
| 4285 MAPK7    | ENST00000308406       | p.R98Q   | c.293  | 0.00805444  | 0     | 1 |
| 4286 HSP90AA1 | ENST00000334701       | p.E345Q  | c.1033 | 0.019290041 | 5.696 | 1 |
| 4286 HSP90AA1 | ENST00000334701       | p.T141S  | c.421  | 0.050626804 | 0     | 1 |
| 4286 HSP90AA1 | ENST00000334701       | p.T221A  | c.661  | 0.031336764 | 4.996 | 1 |
| 4287 CYP1A2   | ENST00000343932       | p.I459M  | c.1377 | 0.026534258 | 0     | 1 |
| 4287 CYP1A2   | ENST00000343932       | p.A140S  | c.418  | 0.026534258 | 5.236 | 1 |
| 4288 CYB5R3   | ENST00000361740       | p.P72L   | c.215  | 0.023864336 | 5.389 | 1 |
| 4288 CYB5R3   | ENST00000361740       | p.R176Q  | c.527  | 0.023864336 | 0     | 1 |
| 4289 AHNAK2   | ENST00000333244       | p.T114M  | c.341  | 1.200406332 | 0     | 2 |
| 4289 AHNAK2   | ENST00000333244       | p.I190M  | c.570  | 0.400812665 | 2.319 | 1 |
| 4290 EXO1     | ENST00000348581       | p.R138Q  | c.413  | 0.041177498 | 0     | 1 |
| 4290 EXO1     | ENST00000348581       | p.G328V  | c.983  | 0.041177498 | 4.602 | 1 |
| 4291 PFKFB1   | ENST00000375006       | p.R353Q  | c.1058 | 0.004812492 | 0     | 1 |
| 4291 PFKFB1   | ENST00000375006       | p.P451L  | c.1352 | 0.004812492 | 7.699 | 1 |
| 4292 CTNNB1   | ENST00000349496       | p.K354T  | c.1061 | 0.130695575 | 2.963 | 1 |
| 4292 CTNNB1   | ENST00000349496       | p.N387K  | c.1161 | 0.147337785 | 0     | 1 |
| 4292 CTNNB1   | ENST00000349496       | p.N426D  | c.1276 | 0.021538824 | 5.711 | 1 |
| 4293 CLEC9A   | ENST00000355819       | p.Q179H  | c.537  | 0.033585912 | 0     | 1 |
| 4293 CLEC9A   | ENST00000355819       | p.S221L  | c.662  | 0.033585912 | 4.896 | 1 |
| 4294 TRAF2    | ENST00000359662       | p.E391Q  | c.1171 | 0.006470083 | 7.272 | 1 |
| 4294 TRAF2    | ENST00000359662       | p.R424H  | c.1271 | 0.006470083 | 0     | 1 |
| 4295          | 7-Sep ENST00000399034 | p.A197S  | c.589  | 0.004606862 | 0     | 1 |
| 4295          | 7-Sep ENST00000399034 | p.P269S  | c.805  | 0.004606862 | 7.762 | 1 |
| 4297 IQGAP1   | ENST00000268182       | p.V1153A | c.3458 | 1.020179021 | 6.631 | 2 |
| 4297 IQGAP1   | ENST00000268182       | p.R1264W | c.3790 | 1.020179021 | 0     | 2 |

|               |                 |         |           |             |       |   |
|---------------|-----------------|---------|-----------|-------------|-------|---|
| 4298 CYP27A1  | ENST00000258415 | p.G372R | c.1114    | 0.114704985 | 0     | 1 |
| 4298 CYP27A1  | ENST00000258415 | p.Q530H | c.1590    | 0.114704985 | 3.124 | 1 |
| 4299 F11R     | ENST00000368026 | p.S154L | c.461     | 0.004367429 | 0     | 1 |
| 4299 F11R     | ENST00000368026 | p.M222I | c.666     | 0.004367429 | 7.839 | 1 |
| 4300 CEP170   | ENST00000366542 | p.M1T   | c.2       | 0.004233305 | 7.884 | 1 |
| 4300 CEP170   | ENST00000366542 | p.E102K | c.304     | 0.004233305 | 0     | 1 |
| 4301 ITK      | ENST00000422843 | p.D445N | c.1333    | 0.017145812 | 5.866 | 1 |
| 4301 ITK      | ENST00000422843 | p.R486I | c.1457    | 0.025519042 | 0     | 1 |
| 4301 ITK      | ENST00000422843 | p.P558L | c.1673    | 0.00837323  | 6.9   | 1 |
| 4302 FUT8     | ENST00000360689 | p.Y511S | c.1532    | 0.075939799 | 0     | 1 |
| 4302 FUT8     | ENST00000360689 | p.Y556H | c.1666    | 0.075939799 | 3.719 | 1 |
| 4303 NRCAM    | ENST00000379028 | p.G692W | c.2074    | 0.186726682 | 0     | 1 |
| 4303 NRCAM    | ENST00000379028 | p.M722I | c.2166    | 0.186726682 | 2.421 | 1 |
| 4304 CNNM4    | ENST00000377075 | p.F394L | c.1182    | 0.0011148   | 0     | 1 |
| 4304 CNNM4    | ENST00000377075 | p.D426N | c.1276    | 0.0011148   | 9.809 | 1 |
| 4305 CD55     | ENST00000367063 | p.R170Q | c.509     | 0.153148166 | 2.707 | 1 |
| 4305 CD55     | ENST00000367063 | p.P218S | c.652     | 0.153148166 | 0     | 1 |
| 4306 HTRA1    | ENST00000368984 | p.G235S | c.703     | 0.101813445 | 4.296 | 1 |
| 4306 HTRA1    | ENST00000368984 | p.S287F | c.860     | 1.050906723 | 0     | 2 |
| 4307 NTRK2    | ENST00000376213 | p.S738T | c.2213    | 0.053142135 | 4.234 | 1 |
| 4307 NTRK2    | ENST00000376213 | p.Y783N | c.2347    | 0.053142135 | 0     | 1 |
| 4308 PARP16   | ENST00000261888 | p.D222H | c.664     | 0.058476469 | 0     | 1 |
| 4308 PARP16   | ENST00000261888 | p.N259S | c.776     | 0.058476469 | 4.096 | 1 |
| 4309 GRB14    | ENST00000263915 | p.N349K | c.1047    | 0.037119357 | 5.945 | 1 |
| 4309 GRB14    | ENST00000263915 | p.D127G | c.380     | 0.022923959 | 6.447 | 1 |
| 4309 GRB14    | ENST00000263915 | p.V133L | c.397     | 0.013331658 | 7.229 | 1 |
| 4309 GRB14    | ENST00000263915 | p.E168K | c.502     | 1.034359982 | 0     | 2 |
| 4310 MVK      | ENST00000228510 | p.Q358H | c.1074    | 0.010851212 | 0     | 1 |
| 4310 MVK      | ENST00000228510 | p.R325H | c.974     | 0.010851212 | 6.526 | 1 |
| 4311 CP       | ENST00000264613 | p.G418S | c.1252    | 0.012560172 | 6.315 | 1 |
| 4311 CP       | ENST00000264613 | p.F600V | c.1798    | 0.012560172 | 0     | 1 |
| 4312 HNRNPA1  | ENST00000340913 | p.T64A  | c.190     | 0.11478452  | 0     | 1 |
| 4312 HNRNPA1  | ENST00000340913 | p.P7R   | c.20      | 0.11478452  | 3.123 | 1 |
| 4313 SERPINA5 | ENST00000554866 | p.D356H | c.1066    | 0.153849693 | 3.215 | 1 |
| 4313 SERPINA5 | ENST00000554866 | p.V383M | c.1147    | 0.021340581 | 7.085 | 1 |
| 4313 SERPINA5 | ENST00000554866 | p.M236K | c.707     | 0.214761233 | 0     | 1 |
| 4313 SERPINA5 | ENST00000554866 | p.P304L | c.911_912 | 0.119552003 | 3.699 | 1 |
| 4313 SERPINA5 | ENST00000554866 | p.F306L | c.918     | 0.054719993 | 5.461 | 1 |
| 4314 TBC1D22B | ENST00000373491 | p.V444A | c.1331    | 0.086629368 | 0     | 1 |
| 4314 TBC1D22B | ENST00000373491 | p.A489S | c.1465    | 0.086629368 | 3.529 | 1 |
| 4315 RAD51    | ENST00000532743 | p.L219R | c.656     | 0.051904377 | 4.268 | 1 |
| 4315 RAD51    | ENST00000532743 | p.V262I | c.784     | 0.051904377 | 0     | 1 |
| 4316 SERPINB2 | ENST00000457692 | p.R223H | c.668     | 0.075718291 | 0     | 1 |
| 4316 SERPINB2 | ENST00000457692 | p.D274N | c.820     | 0.052653005 | 4.282 | 1 |
| 4316 SERPINB2 | ENST00000457692 | p.T277N | c.830     | 0.025565037 | 5.362 | 1 |
| 4317 ALDH2    | ENST00000261733 | p.R114W | c.340     | 0.01165425  | 6.423 | 1 |
| 4317 ALDH2    | ENST00000261733 | p.D333N | c.997     | 0.01165425  | 0     | 1 |
| 4318 KDM2A    | ENST00000529006 | p.R137Q | c.410     | 0.113754853 | 3.136 | 1 |
| 4318 KDM2A    | ENST00000529006 | p.V204A | c.611     | 0.113754853 | 0     | 1 |



|      |        |                 |          |        |             |       |   |
|------|--------|-----------------|----------|--------|-------------|-------|---|
| 4319 | PTPRJ  | ENST00000418331 | p.R1070H | c.3209 | 0.032195436 | 0     | 1 |
| 4319 | PTPRJ  | ENST00000418331 | p.C1239R | c.3715 | 0.032195436 | 4.957 | 1 |
| 4320 | ESRRG  | ENST00000360012 | p.D231N  | c.691  | 0.007737054 | 7.014 | 1 |
| 4320 | ESRRG  | ENST00000360012 | p.M275R  | c.824  | 0.007737054 | 0     | 1 |
| 4321 | APLP1  | ENST00000221891 | p.F354L  | c.1062 | 0.025120343 | 6.315 | 1 |
| 4321 | APLP1  | ENST00000221891 | p.R330C  | c.988  | 1.012560172 | 0     | 2 |
| 4322 | CD2AP  | ENST00000359314 | p.Y4C    | c.11   | 0.096254647 | 3.377 | 1 |
| 4322 | CD2AP  | ENST00000359314 | p.V29A   | c.86   | 0.096254647 | 0     | 1 |
| 4323 | PTGIS  | ENST00000244043 | p.D336N  | c.1006 | 0.011422324 | 0     | 1 |
| 4323 | PTGIS  | ENST00000244043 | p.P500Q  | c.1499 | 0.011422324 | 6.452 | 1 |
| 4324 | FGF18  | ENST00000274625 | p.R60W   | c.178  | 0.010635845 | 7.489 | 1 |
| 4324 | FGF18  | ENST00000274625 | p.T139M  | c.416  | 0.010749542 | 0     | 1 |
| 4324 | FGF18  | ENST00000274625 | p.E167K  | c.499  | 0.010252281 | 7.592 | 1 |
| 4325 | PRKAA2 | ENST00000371244 | p.R421L  | c.1262 | 0.008431471 | 6.89  | 1 |
| 4325 | PRKAA2 | ENST00000371244 | p.L546Q  | c.1637 | 0.008431471 | 0     | 1 |
| 4326 | SOS1   | ENST00000426016 | p.S880L  | c.2639 | 0.013849714 | 6.174 | 1 |
| 4326 | SOS1   | ENST00000426016 | p.L1009I | c.3025 | 0.013849714 | 0     | 1 |
| 4327 | LGR4   | ENST00000379214 | p.L418R  | c.1253 | 0.007817917 | 6.999 | 1 |
| 4327 | LGR4   | ENST00000379214 | p.S461F  | c.1382 | 0.007817917 | 0     | 1 |
| 4328 | CCBL1  | ENST00000436267 | p.R232H  | c.695  | 0.031752192 | 4.977 | 1 |
| 4328 | CCBL1  | ENST00000436267 | p.R268C  | c.802  | 0.031752192 | 0     | 1 |
| 4330 | BCKDHB | ENST00000356489 | p.R359T  | c.1076 | 0.010783729 | 0     | 1 |
| 4330 | BCKDHB | ENST00000356489 | p.W310S  | c.929  | 0.010783729 | 6.535 | 1 |
| 4331 | EBF1   | ENST00000313708 | p.G296S  | c.886  | 0.121161227 | 0     | 1 |
| 4331 | EBF1   | ENST00000313708 | p.E324K  | c.970  | 0.121161227 | 3.045 | 1 |
| 4332 | ACVRL1 | ENST00000550683 | p.T49K   | c.146  | 0.002794876 | 0     | 1 |
| 4332 | ACVRL1 | ENST00000550683 | p.S124L  | c.371  | 0.002794876 | 8.483 | 1 |
| 4333 | HDAC3  | ENST00000305264 | p.K44N   | c.132  | 0.010180837 | 0     | 1 |
| 4333 | HDAC3  | ENST00000305264 | p.A6T    | c.16   | 0.010180837 | 6.618 | 1 |
| 4334 | MEFV   | ENST00000219596 | p.L602M  | c.1804 | 0.069927319 | 3.838 | 1 |
| 4334 | MEFV   | ENST00000219596 | p.L643M  | c.1927 | 0.069927319 | 0     | 1 |
| 4335 | LIG4   | ENST00000356922 | p.L92V   | c.274  | 0.076203443 | 3.714 | 1 |
| 4335 | LIG4   | ENST00000356922 | p.L171R  | c.512  | 0.076203443 | 0     | 1 |
| 4337 | C8A    | ENST00000361249 | p.G338D  | c.1013 | 0.034534164 | 6.477 | 1 |
| 4337 | C8A    | ENST00000361249 | p.H465Y  | c.1393 | 1.02492306  | 0     | 2 |
| 4337 | C8A    | ENST00000361249 | p.S259T  | c.776  | 0.027393929 | 6.19  | 1 |
| 4338 | INS    | ENST00000250971 | p.E59K   | c.175  | 0.017615631 | 5.827 | 1 |
| 4338 | INS    | ENST00000250971 | p.G32R   | c.94   | 0.017615631 | 0     | 1 |
| 4339 | BTN3A1 | ENST00000289361 | p.Q178K  | c.532  | 0.031012637 | 0     | 1 |
| 4339 | BTN3A1 | ENST00000289361 | p.I222M  | c.666  | 0.031012637 | 5.011 | 1 |
| 4340 | QPRT   | ENST00000395384 | p.P58S   | c.172  | 0.018466189 | 0     | 1 |
| 4340 | QPRT   | ENST00000395384 | p.L108M  | c.322  | 0.011257264 | 6.473 | 1 |
| 4340 | QPRT   | ENST00000395384 | p.A3T    | c.7    | 0.007208926 | 7.116 | 1 |
| 4341 | KRAS   | ENST00000256078 | p.K5E    | c.13   | 0.035133716 | 0     | 1 |
| 4341 | KRAS   | ENST00000256078 | p.D132G  | c.395  | 0.035133716 | 4.831 | 1 |
| 4342 | CKB    | ENST00000348956 | p.A76V   | c.227  | 0.048495678 | 0     | 1 |
| 4342 | CKB    | ENST00000348956 | p.L281V  | c.841  | 0.048495678 | 4.366 | 1 |
| 4343 | IKBKB  | ENST00000520810 | p.G209S  | c.625  | 0.029545145 | 5.15  | 1 |
| 4343 | IKBKB  | ENST00000520810 | p.A212T  | c.634  | 0.050417574 | 4.35  | 1 |

|      |          |                 |                   |           |             |       |   |
|------|----------|-----------------|-------------------|-----------|-------------|-------|---|
| 4343 | IKBBB    | ENST00000520810 | p.W276R           | c.826     | 0.077200583 | 0     | 1 |
| 4344 | AHCYL1   | ENST00000369799 | p.R365W           | c.1093    | 0.005778857 | 7.435 | 1 |
| 4344 | AHCYL1   | ENST00000369799 | p.C392Y           | c.1175    | 0.005778857 | 0     | 1 |
| 4345 | SPRED1   | ENST00000299084 | p.V42A            | c.125     | 0.108517528 | 0     | 1 |
| 4345 | SPRED1   | ENST00000299084 | p.R16L            | c.47      | 0.108517528 | 3.204 | 1 |
| 4346 | HADH     | ENST00000403312 | p.E241Q           | c.721     | 0.063730216 | 4.514 | 1 |
| 4346 | HADH     | ENST00000403312 | p.P274S           | c.820     | 0.013118341 | 9.75  | 1 |
| 4346 | HADH     | ENST00000403312 | p.G275W           | c.823     | 0.142054629 | 0     | 1 |
| 4346 | HADH     | ENST00000403312 | p.E318K           | c.952     | 0.113333862 | 3.364 | 1 |
| 4347 | ADAMTS1  | ENST00000284984 | p.L355R           | c.1064    | 0.132861959 | 2.912 | 1 |
| 4347 | ADAMTS1  | ENST00000284984 | p.S386F           | c.1157    | 0.132861959 | 0     | 1 |
| 4348 | SNRNP200 | ENST00000323853 | p.H618N           | c.1852    | 0.03180588  | 6.767 | 1 |
| 4348 | SNRNP200 | ENST00000323853 | p.A813S           | c.2437    | 0.045499673 | 4.458 | 1 |
| 4348 | SNRNP200 | ENST00000323853 | p.D848G           | c.2543    | 0.05468152  | 0     | 1 |
| 4349 | GSTA4    | ENST00000370963 | p.Q54in_frame_del | c.162_160 | 0.006929659 | 0     | 1 |
| 4349 | GSTA4    | ENST00000370963 | p.E97D            | c.291     | 0.006929659 | 7.173 | 1 |
| 4350 | NUDT2    | ENST00000379158 | p.A63V            | c.188     | 0.360635042 | 4.923 | 1 |
| 4350 | NUDT2    | ENST00000379158 | p.I10M            | c.30      | 1.26979047  | 0     | 2 |
| 4350 | NUDT2    | ENST00000379158 | p.I105F           | c.313     | 0.319174266 | 6.127 | 1 |
| 4350 | NUDT2    | ENST00000379158 | p.R115H           | c.344     | 0.455556678 | 2.168 | 1 |
| 4351 | ERO1L    | ENST00000554019 | p.Y76C            | c.227     | 0.085200163 | 0     | 1 |
| 4351 | ERO1L    | ENST00000554019 | p.T148A           | c.442     | 0.085200163 | 3.553 | 1 |
| 4352 | CASP6    | ENST00000265164 | p.E191K           | c.571     | 0.155609279 | 0     | 1 |
| 4352 | CASP6    | ENST00000265164 | p.R220W           | c.658     | 0.155609279 | 2.684 | 1 |
| 4353 | MAP2K7   | ENST00000545011 | p.S397P           | c.1189    | 0.026314467 | 5.248 | 1 |
| 4353 | MAP2K7   | ENST00000545011 | p.S420I           | c.1259    | 0.026314467 | 0     | 1 |
| 4354 | CTNND1   | ENST00000428599 | p.R736L           | c.2207    | 0.025523969 | 0     | 1 |
| 4354 | CTNND1   | ENST00000428599 | p.V779L           | c.2335    | 0.016933218 | 5.884 | 1 |
| 4354 | CTNND1   | ENST00000428599 | p.A781T           | c.2341    | 0.008590751 | 6.863 | 1 |
| 4355 | HIBADH   | ENST00000265395 | p.P259T           | c.775     | 0.011981896 | 6.383 | 1 |
| 4355 | HIBADH   | ENST00000265395 | p.P268L           | c.803     | 0.012242144 | 6.352 | 1 |
| 4355 | HIBADH   | ENST00000265395 | p.F323I           | c.967     | 0.024224039 | 0     | 1 |
| 4356 | ITGA4    | ENST00000397033 | p.R481K           | c.1442    | 0.01589812  | 5.975 | 1 |
| 4356 | ITGA4    | ENST00000397033 | p.R569L           | c.1706    | 0.01589812  | 0     | 1 |
| 4357 | PPP3CA   | ENST00000394854 | p.R486C           | c.1456    | 0.024231038 | 0     | 1 |
| 4357 | PPP3CA   | ENST00000394854 | p.A223E           | c.668     | 0.024231038 | 5.367 | 1 |
| 4358 | KCNMA1   | ENST00000404771 | p.R787S           | c.2361    | 0.087171479 | 4.52  | 1 |
| 4358 | KCNMA1   | ENST00000404771 | p.T892M           | c.2675    | 1.04358574  | 0     | 2 |
| 4359 | GLUL     | ENST00000311223 | p.D63N            | c.187     | 0.009086875 | 0     | 1 |
| 4359 | GLUL     | ENST00000311223 | p.R324C           | c.970     | 0.009086875 | 6.782 | 1 |
| 4360 | CPA1     | ENST00000011292 | p.D115N           | c.343     | 0.022390026 | 5.481 | 1 |
| 4360 | CPA1     | ENST00000011292 | p.R155H           | c.464     | 0.022390026 | 0     | 1 |
| 4361 | GRM5     | ENST00000305447 | p.G92C            | c.274     | 2.10330629  | 0     | 1 |
| 4361 | GRM5     | ENST00000305447 | p.G92R            | c.274     | 2.10330629  | 0     | 1 |
| 4361 | GRM5     | ENST00000305447 | p.G92D            | c.275     | 2.10330629  | 0     | 1 |
| 4361 | GRM5     | ENST00000305447 | p.P32L            | c.95      | 0.309918869 | 3.275 | 1 |
| 4362 | PFKFB1   | ENST00000375006 | p.F93L            | c.279     | 0.012951755 | 0     | 1 |
| 4362 | PFKFB1   | ENST00000375006 | p.D192Y           | c.574     | 0.006606033 | 7.242 | 1 |
| 4362 | PFKFB1   | ENST00000375006 | p.R196I           | c.587     | 0.009385117 | 7.3   | 1 |

|              |                 |          |           |             |       |   |
|--------------|-----------------|----------|-----------|-------------|-------|---|
| 4363 CYP2C19 | ENST00000371321 | p.S180F  | c.539     | 0.029177498 | 0     | 1 |
| 4363 CYP2C19 | ENST00000371321 | p.R261G  | c.781     | 0.029177498 | 5.099 | 1 |
| 4364 MSH6    | ENST00000234420 | p.E956D  | c.2868    | 0.029076552 | 0     | 1 |
| 4364 MSH6    | ENST00000234420 | p.L979V  | c.2935    | 0.029076552 | 5.104 | 1 |
| 4365 TNFAIP6 | ENST00000243347 | p.E156K  | c.466     | 1.013984767 | 0     | 1 |
| 4365 TNFAIP6 | ENST00000243347 | p.E156D  | c.468     | 1.013984767 | 0     | 1 |
| 4365 TNFAIP6 | ENST00000243347 | p.D191N  | c.571     | 0.027969533 | 6.16  | 1 |
| 4366 TEK     | ENST00000380036 | p.L377P  | c.1130    | 0.039857637 | 0     | 1 |
| 4366 TEK     | ENST00000380036 | p.T401K  | c.1202    | 0.039857637 | 4.649 | 1 |
| 4367 PAK1    | ENST00000278568 | p.V356L  | c.1066    | 0.110830917 | 0     | 1 |
| 4367 PAK1    | ENST00000278568 | p.R421L  | c.1262    | 0.02661645  | 5.351 | 1 |
| 4367 PAK1    | ENST00000278568 | p.M457I  | c.1371    | 0.088444839 | 3.534 | 1 |
| 4368 SMAD4   | ENST00000342988 | p.W524C  | c.1572    | 0.067358322 | 0     | 1 |
| 4368 SMAD4   | ENST00000342988 | p.A327V  | c.980     | 0.067358322 | 3.892 | 1 |
| 4369 NCAM2   | ENST00000400546 | p.A210T  | c.628     | 1.068357198 | 0     | 1 |
| 4369 NCAM2   | ENST00000400546 | p.A210E  | c.629     | 1.068357198 | 0     | 1 |
| 4369 NCAM2   | ENST00000400546 | p.R233M  | c.698     | 0.158758947 | 3.907 | 1 |
| 4369 NCAM2   | ENST00000400546 | p.G261R  | c.781     | 0.028826897 | 9.204 | 1 |
| 4370 FLNC    | ENST00000325888 | p.G2420V | c.7259    | 0.147621109 | 2.917 | 1 |
| 4370 FLNC    | ENST00000325888 | p.R2443L | c.7328    | 0.130162572 | 3.121 | 1 |
| 4370 FLNC    | ENST00000325888 | p.I2469M | c.7407    | 0.247346048 | 0     | 1 |
| 4371 POLD2   | ENST00000452185 | p.E274D  | c.822     | 0.002343694 | 8.737 | 1 |
| 4371 POLD2   | ENST00000452185 | p.M315I  | c.945     | 0.002343694 | 0     | 1 |
| 4372 RHPN2   | ENST00000254260 | p.R515G  | c.1543    | 0.08704647  | 0     | 1 |
| 4372 RHPN2   | ENST00000254260 | p.E587K  | c.1759    | 0.020913671 | 5.656 | 1 |
| 4372 RHPN2   | ENST00000254260 | p.V591M  | c.1771    | 0.055603982 | 4.197 | 1 |
| 4372 RHPN2   | ENST00000254260 | p.L593F  | c.1777    | 0.012691444 | 6.3   | 1 |
| 4373 DOCK2   | ENST00000256935 | p.R1200C | c.3598    | 1.006087223 | 0     | 2 |
| 4373 DOCK2   | ENST00000256935 | p.D1229N | c.3685    | 0.012174447 | 7.36  | 1 |
| 4374 CFH     | ENST00000367429 | p.P695H  | c.2084    | 0.316073681 | 2.084 | 1 |
| 4374 CFH     | ENST00000367429 | p.E696D  | c.2088    | 0.420306832 | 1.556 | 1 |
| 4374 CFH     | ENST00000367429 | p.F717I  | c.2149    | 0.575952276 | 0     | 1 |
| 4375 STARD6  | ENST00000307844 | p.G52E   | c.155     | 0.392512636 | 0     | 1 |
| 4375 STARD6  | ENST00000307844 | p.L167V  | c.499     | 0.326924483 | 1.742 | 1 |
| 4375 STARD6  | ENST00000307844 | p.V168A  | c.503     | 0.12152722  | 3.418 | 1 |
| 4376 GBP1    | ENST00000370473 | p.A551V  | c.1652    | 0.014457882 | 7.112 | 1 |
| 4376 GBP1    | ENST00000370473 | p.I576M  | c.1728    | 1.007228941 | 0     | 2 |
| 4377 F5      | ENST00000367796 | p.H1811N | c.5431    | 0.027884404 | 6.293 | 1 |
| 4377 F5      | ENST00000367796 | p.P264T  | c.790     | 1.199221176 | 0     | 1 |
| 4377 F5      | ENST00000367796 | p.P264K  | c.791_790 | 1.199221176 | 0     | 1 |
| 4377 F5      | ENST00000367796 | p.H315Y  | c.943     | 0.375314065 | 2.423 | 1 |
| 4378 AOC1    | ENST00000416793 | p.A443E  | c.1328    | 0.031576608 | 0     | 1 |
| 4378 AOC1    | ENST00000416793 | p.V735M  | c.2203    | 0.031576608 | 4.985 | 1 |
| 4379 CYP27A1 | ENST00000258415 | p.C218F  | c.653     | 0.085555238 | 3.547 | 1 |
| 4379 CYP27A1 | ENST00000258415 | p.L285R  | c.854     | 0.085555238 | 0     | 1 |
| 4380 ATP7A   | ENST00000341514 | p.R1067I | c.3200    | 0.287174589 | 1.8   | 1 |
| 4380 ATP7A   | ENST00000341514 | p.D1219Y | c.3655    | 0.287174589 | 0     | 1 |
| 4381 C5      | ENST00000223642 | p.S1058P | c.3172    | 0.113518552 | 0     | 1 |
| 4381 C5      | ENST00000223642 | p.P194A  | c.580     | 0.113518552 | 3.139 | 1 |

|      |           |                 |          |        |             |       |    |
|------|-----------|-----------------|----------|--------|-------------|-------|----|
| 4382 | HECW2     | ENST00000260983 | p.S60N   | c.179  | 0.25348987  | 1.98  | 1  |
| 4382 | HECW2     | ENST00000260983 | p.D81N   | c.241  | 0.25348987  | 0     | 1  |
| 4383 | HSPA8     | ENST00000227378 | p.I346N  | c.1037 | 0.014680043 | 0     | 1  |
| 4383 | HSPA8     | ENST00000227378 | p.R311C  | c.931  | 0.014680043 | 6.09  | 1  |
| 4384 | RB1       | ENST00000267163 | p.S127I  | c.380  | 0.009631659 | 0     | 1  |
| 4384 | RB1       | ENST00000267163 | p.M148T  | c.443  | 0.009631659 | 6.698 | 1  |
| 4385 | FGA       | ENST00000302053 | p.E170D  | c.510  | 0.158838519 | 2.716 | 1  |
| 4385 | FGA       | ENST00000302053 | p.V171M  | c.511  | 0.050288971 | 4.518 | 1  |
| 4385 | FGA       | ENST00000302053 | p.V192I  | c.574  | 0.195841956 | 0     | 1  |
| 4386 | WARS      | ENST00000355338 | p.S353I  | c.1058 | 0.093882495 | 3.413 | 1  |
| 4386 | WARS      | ENST00000355338 | p.G29R   | c.85   | 0.093882495 | 0     | 1  |
| 4387 | PARP15    | ENST00000464300 | p.D426N  | c.1276 | 0.100869953 | 0     | 1  |
| 4387 | PARP15    | ENST00000464300 | p.V289F  | c.865  | 0.09030815  | 3.469 | 1  |
| 4387 | PARP15    | ENST00000464300 | p.E316K  | c.946  | 0.010561803 | 6.565 | 1  |
| 4388 | RAC2      | ENST00000249071 | p.F82L   | c.246  | 0.009030365 | 0     | 1  |
| 4388 | RAC2      | ENST00000249071 | p.G15D   | c.44   | 0.009030365 | 6.791 | 1  |
| 4389 | GRIK2     | ENST00000421544 | p.R458Q  | c.1373 | 0.010798689 | 6.533 | 1  |
| 4389 | GRIK2     | ENST00000421544 | p.E479K  | c.1435 | 0.010798689 | 0     | 1  |
| 4390 | AQP1      | ENST00000434909 | p.V167I  | c.499  | 0.073965689 | 3.757 | 1  |
| 4391 | PTP4A1    | ENST00000370651 | p.A106T  | c.316  | 0.025577162 | 5.289 | 1  |
| 4391 | PTP4A1    | ENST00000370651 | p.N24K   | c.72   | 0.025577162 | 0     | 1  |
| 4392 | EIF5A     | ENST00000572815 | p.S46L   | c.137  | 0.004397807 | 7.829 | 1  |
| 4392 | EIF5A     | ENST00000572815 | p.P74L   | c.221  | 0.004397807 | 0     | 1  |
| 4393 | KAT2A     | ENST00000225916 | p.V526A  | c.1577 | 0.063372467 | 0     | 1  |
| 4393 | KAT2A     | ENST00000225916 | p.T582N  | c.1745 | 0.063372467 | 3.98  | 1  |
| 4394 | ATIC      | ENST00000236959 | p.R172L  | c.515  | 0.018893057 | 5.726 | 1  |
| 4394 | ATIC      | ENST00000236959 | p.Q196H  | c.588  | 0.018893057 | 0     | 1  |
| 4395 | DUSP19    | ENST00000354221 | p.V98A   | c.293  | 0.052229185 | 0     | 1  |
| 4395 | DUSP19    | ENST00000354221 | p.V148L  | c.442  | 0.052229185 | 4.259 | 1  |
| 4396 | MASP2     | ENST00000400897 | p.E557V  | c.1670 | 0.020207015 | 5.629 | 1  |
| 4396 | MASP2     | ENST00000400897 | p.E643V  | c.1928 | 0.020207015 | 0     | 1  |
| 4397 | MTR       | ENST00000366577 | p.V155M  | c.463  | 0.024671684 | 5.341 | 1  |
| 4397 | MTR       | ENST00000366577 | p.S237F  | c.710  | 0.024671684 | 0     | 1  |
| 4398 | HIST1H2AE | ENST00000303910 | p.A53V   | c.158  | 0.043646204 | 0     | 1  |
| 4398 | HIST1H2AE | ENST00000303910 | p.P27S   | c.79   | 0.043646204 | 4.518 | 1  |
| 4399 | C1QA      | ENST00000374642 | p.V155A  | c.464  | 0.011743449 | 6.412 | 1  |
| 4399 | C1QA      | ENST00000374642 | p.G212D  | c.635  | 0.011743449 | 0     | 1  |
| 4400 | DNMT3A    | ENST00000321117 | p.K680R  | c.2039 | 1.799457409 | 3.676 | 1  |
| 4400 | DNMT3A    | ENST00000321117 | p.R882H  | c.2645 | 22.07823728 | 0     | 23 |
| 4401 | ACADM     | ENST00000370834 | p.S353L  | c.1058 | 0.03739528  | 4.741 | 1  |
| 4401 | ACADM     | ENST00000370834 | p.L442R  | c.1325 | 0.03739528  | 0     | 1  |
| 4402 | PRKAG1    | ENST00000316299 | p.Y250C  | c.749  | 0.016320856 | 6.052 | 1  |
| 4402 | PRKAG1    | ENST00000316299 | p.S251F  | c.752  | 0.085167475 | 3.593 | 1  |
| 4402 | PRKAG1    | ENST00000316299 | p.K287Q  | c.859  | 0.01369564  | 6.305 | 1  |
| 4402 | PRKAG1    | ENST00000316299 | p.R308Q  | c.923  | 0.110589741 | 0     | 1  |
| 4403 | HS3ST1    | ENST00000002596 | p.D91N   | c.271  | 0.189858961 | 3.397 | 1  |
| 4403 | HS3ST1    | ENST00000002596 | p.A122T  | c.364  | 1.094929481 | 0     | 1  |
| 4403 | HS3ST1    | ENST00000002596 | p.A122V  | c.365  | 1.094929481 | 0     | 1  |
| 4404 | EPRS      | ENST00000366923 | p.R1119C | c.3355 | 0.292435141 | 0     | 1  |

|      |        |                 |          |           |             |       |   |
|------|--------|-----------------|----------|-----------|-------------|-------|---|
| 4404 | EPRS   | ENST00000366923 | p.N1149S | c.3446    | 0.183776702 | 2.62  | 1 |
| 4404 | EPRS   | ENST00000366923 | p.V1151L | c.3451    | 0.150876379 | 2.946 | 1 |
| 4405 | MASP2  | ENST00000400897 | p.A484V  | c.1451    | 0.021767473 | 0     | 1 |
| 4405 | MASP2  | ENST00000400897 | p.E521K  | c.1561    | 0.012149157 | 6.363 | 1 |
| 4405 | MASP2  | ENST00000400897 | p.A534T  | c.1600    | 0.009618316 | 6.7   | 1 |
| 4406 | PRMT2  | ENST00000397637 | p.A39T   | c.115     | 0.185179975 | 2.433 | 1 |
| 4406 | PRMT2  | ENST00000397637 | p.H83Y   | c.246_247 | 0.185179975 | 0     | 1 |
| 4407 | PRPF8  | ENST00000572621 | p.R1832C | c.5494    | 2.047072131 | 0     | 2 |
| 4407 | PRPF8  | ENST00000572621 | p.R1832H | c.5495    | 2.047072131 | 0     | 1 |
| 4407 | PRPF8  | ENST00000572621 | p.P1871L | c.5612    | 0.070265606 | 5.416 | 1 |
| 4407 | PRPF8  | ENST00000572621 | p.L1872R | c.5615    | 0.070950787 | 5.402 | 1 |
| 4408 | RAB1A  | ENST00000409784 | p.I88T   | c.263     | 0.006341325 | 7.301 | 1 |
| 4408 | RAB1A  | ENST00000409784 | p.P149S  | c.445     | 0.118763614 | 0     | 1 |
| 4408 | RAB1A  | ENST00000409784 | p.E171D  | c.513     | 0.112422289 | 3.153 | 1 |
| 4409 | RPS3   | ENST00000278572 | p.R122C  | c.364     | 0.06505507  | 5.773 | 1 |
| 4409 | RPS3   | ENST00000278572 | p.R189C  | c.565     | 1.02807575  | 0     | 2 |
| 4409 | RPS3   | ENST00000278572 | p.R27W   | c.79      | 0.021868718 | 7.509 | 1 |
| 4409 | RPS3   | ENST00000278572 | p.A30D   | c.89      | 0.026187936 | 7.862 | 1 |
| 4410 | PRKAA2 | ENST00000371244 | p.R72H   | c.215     | 0.020235047 | 5.627 | 1 |
| 4410 | PRKAA2 | ENST00000371244 | p.H73Q   | c.219     | 0.018091675 | 7.148 | 1 |
| 4410 | PRKAA2 | ENST00000371244 | p.V287I  | c.859     | 0.038988654 | 0     | 1 |
| 4410 | PRKAA2 | ENST00000371244 | p.L311V  | c.931     | 0.01170282  | 6.417 | 1 |
| 4411 | HGD    | ENST00000283871 | p.F10L   | c.30      | 0.120742041 | 3.05  | 1 |
| 4411 | HGD    | ENST00000283871 | p.P224R  | c.671     | 0.120742041 | 0     | 1 |
| 4412 | C6     | ENST00000263413 | p.P527T  | c.1579    | 0.012560172 | 6.315 | 1 |
| 4412 | C6     | ENST00000263413 | p.S561F  | c.1682    | 0.033566969 | 0     | 1 |
| 4412 | C6     | ENST00000263413 | p.R596Q  | c.1787    | 0.021006797 | 5.573 | 1 |
| 4413 | THEM5  | ENST00000368817 | p.F156C  | c.467     | 0.086030975 | 3.539 | 1 |
| 4413 | THEM5  | ENST00000368817 | p.V196M  | c.586     | 0.086030975 | 0     | 1 |
| 4414 | TRIP10 | ENST00000313244 | p.E413Q  | c.1237    | 0.018788582 | 5.734 | 1 |
| 4414 | TRIP10 | ENST00000313244 | p.R456G  | c.1366    | 0.018788582 | 0     | 1 |
| 4415 | PRPS1  | ENST00000543248 | p.E51Q   | c.151     | 0.188866312 | 0     | 1 |
| 4415 | PRPS1  | ENST00000543248 | p.A82T   | c.244     | 0.088758165 | 3.643 | 1 |
| 4415 | PRPS1  | ENST00000543248 | p.R84W   | c.250     | 0.117529494 | 3.2   | 1 |
| 4416 | KCNMA1 | ENST00000404771 | p.T781S  | c.2341    | 0.018198962 | 0     | 1 |
| 4416 | KCNMA1 | ENST00000404771 | p.P863L  | c.2588    | 0.018198962 | 5.78  | 1 |
| 4417 | PPARD  | ENST00000360694 | p.R369L  | c.1106    | 0.085044955 | 4.829 | 1 |
| 4417 | PPARD  | ENST00000360694 | p.R258W  | c.772     | 1.074019228 | 0     | 1 |
| 4417 | PPARD  | ENST00000360694 | p.R258Q  | c.773     | 1.074019228 | 0     | 1 |
| 4417 | PPARD  | ENST00000360694 | p.V279A  | c.836     | 0.045943354 | 5.444 | 1 |
| 4417 | PPARD  | ENST00000360694 | p.V286M  | c.856     | 0.031730191 | 5.978 | 1 |
| 4418 | PRLR   | ENST00000382002 | p.G55V   | c.164     | 0.016356411 | 5.934 | 1 |
| 4418 | PRLR   | ENST00000382002 | p.Q108K  | c.322     | 0.016356411 | 0     | 1 |
| 4419 | CTH    | ENST00000370938 | p.C109Y  | c.326     | 0.012413038 | 7.332 | 1 |
| 4419 | CTH    | ENST00000370938 | p.K131N  | c.393     | 1.006206519 | 0     | 2 |
| 4420 | MYLK4  | ENST00000274643 | p.K135N  | c.405     | 0.007641121 | 7.032 | 1 |
| 4420 | MYLK4  | ENST00000274643 | p.D175N  | c.523     | 0.007641121 | 0     | 1 |
| 4421 | PPT1   | ENST00000433473 | p.S115P  | c.343     | 0.020760716 | 0     | 1 |
| 4421 | PPT1   | ENST00000433473 | p.S138L  | c.413     | 0.020760716 | 5.59  | 1 |

|      |         |                 |          |             |             |       |   |
|------|---------|-----------------|----------|-------------|-------------|-------|---|
| 4422 | FGD5    | ENST00000285046 | p.A991T  | c.2971      | 0.037188491 | 0     | 1 |
| 4422 | FGD5    | ENST00000285046 | p.R1080H | c.3239      | 0.037188491 | 4.749 | 1 |
| 4423 | MAT1A   | ENST00000372213 | p.Y377C  | c.1130      | 0.132221064 | 4.61  | 1 |
| 4423 | MAT1A   | ENST00000372213 | p.R169C  | c.505       | 1.042328949 | 0     | 1 |
| 4423 | MAT1A   | ENST00000372213 | p.R169H  | c.506       | 1.042328949 | 0     | 1 |
| 4423 | MAT1A   | ENST00000372213 | p.G26R   | c.76        | 0.03643747  | 9.502 | 1 |
| 4424 | GCKR    | ENST00000264717 | p.S183Y  | c.548       | 0.006688971 | 0     | 1 |
| 4424 | GCKR    | ENST00000264717 | p.R227Q  | c.680       | 0.006688971 | 7.224 | 1 |
| 4425 | VDR     | ENST00000550325 | p.T465A  | c.1393      | 0.147698452 | 0     | 1 |
| 4425 | VDR     | ENST00000550325 | p.R204Q  | c.611       | 0.131719056 | 3.701 | 1 |
| 4425 | VDR     | ENST00000550325 | p.A281V  | c.842       | 0.12563109  | 3.82  | 1 |
| 4426 | DLG1    | ENST00000357674 | p.A370T  | c.1108      | 0.030248345 | 0     | 1 |
| 4426 | DLG1    | ENST00000357674 | p.S314N  | c.941       | 0.030248345 | 5.047 | 1 |
| 4427 | SHC1    | ENST00000448116 | p.G362V  | c.1085      | 0.141218402 | 0     | 1 |
| 4427 | SHC1    | ENST00000448116 | p.S427C  | c.1280      | 0.141218402 | 2.824 | 1 |
| 4428 | TOP1    | ENST00000361337 | p.K484N  | c.1452      | 0.098345306 | 0     | 1 |
| 4428 | TOP1    | ENST00000361337 | p.E526Q  | c.1576      | 0.098345306 | 3.346 | 1 |
| 4429 | UPP2    | ENST00000605860 | p.R357W  | c.1069      | 0.082640913 | 0     | 1 |
| 4429 | UPP2    | ENST00000605860 | p.P264Q  | c.791       | 0.082640913 | 3.597 | 1 |
| 4430 | EPHX2   | ENST00000521400 | p.K455E  | c.1363      | 0.016379101 | 0     | 1 |
| 4430 | EPHX2   | ENST00000521400 | p.A290D  | c.869       | 0.016379101 | 5.932 | 1 |
| 4431 | CYP46A1 | ENST00000261835 | p.A111V  | c.332       | 0.143885747 | 0     | 1 |
| 4431 | CYP46A1 | ENST00000261835 | p.G221E  | c.662       | 0.016251104 | 6.119 | 1 |
| 4431 | CYP46A1 | ENST00000261835 | p.R226S  | c.676       | 0.131361048 | 2.949 | 1 |
| 4432 | SIRT2   | ENST00000249396 | p.P140H  | c.419       | 0.064480199 | 0     | 1 |
| 4432 | SIRT2   | ENST00000249396 | p.F190V  | c.568       | 0.064480199 | 3.955 | 1 |
| 4433 | PRKCA   | ENST00000413366 | p.F435C  | c.1304      | 0.002804579 | 8.478 | 1 |
| 4433 | PRKCA   | ENST00000413366 | p.S560F  | c.1679      | 0.002804579 | 0     | 1 |
| 4434 | ACTN2   | ENST00000542672 | p.L424F  | c.1272      | 0.139199512 | 0     | 1 |
| 4434 | ACTN2   | ENST00000542672 | p.T497A  | c.1489      | 0.133691614 | 2.983 | 1 |
| 4434 | ACTN2   | ENST00000542672 | p.K499N  | c.1497      | 0.014326438 | 6.297 | 1 |
| 4435 | GAPDH   | ENST00000396859 | p.A161S  | c.481       | 1.072443497 | 0     | 2 |
| 4435 | GAPDH   | ENST00000396859 | p.V220L  | c.658       | 0.144886994 | 3.787 | 1 |
| 4436 | B4GALT1 | ENST00000379731 | p.R185H  | c.554       | 0.056328154 | 0     | 1 |
| 4436 | B4GALT1 | ENST00000379731 | p.A217V  | c.650       | 0.056328154 | 4.15  | 1 |
| 4437 | PRKACA  | ENST00000308677 | p.R94C   | c.280       | 0.012949139 | 6.271 | 1 |
| 4437 | PRKACA  | ENST00000308677 | p.R191C  | c.571       | 0.012949139 | 0     | 1 |
| 4438 | MTR     | ENST00000366577 | p.L146V  | c.436       | 0.021762679 | 6.522 | 1 |
| 4438 | MTR     | ENST00000366577 | p.A175T  | c.523       | 1.01088134  | 0     | 2 |
| 4439 | PRKCB   | ENST00000303531 | p.T412A  | c.1234      | 0.004671171 | 7.742 | 1 |
| 4439 | PRKCB   | ENST00000303531 | p.M413N  | c.1238_1239 | 0.020574483 | 5.603 | 1 |
| 4440 | SPTB    | ENST00000556626 | p.A1177T | c.3529      | 0.010642641 | 6.554 | 1 |
| 4440 | SPTB    | ENST00000556626 | p.S1230F | c.3689      | 0.010642641 | 0     | 1 |
| 4441 | PRKCB   | ENST00000303531 | p.C386S  | c.1156      | 0.047136877 | 0     | 1 |
| 4442 | GSN     | ENST00000373818 | p.E58K   | c.172       | 0.086809696 | 3.526 | 1 |
| 4442 | GSN     | ENST00000373818 | p.D77N   | c.229       | 0.007938048 | 6.977 | 1 |
| 4442 | GSN     | ENST00000373818 | p.V133M  | c.397       | 0.094747744 | 0     | 1 |
| 4443 | A2M     | ENST00000318602 | p.L621P  | c.1862      | 0.013773127 | 0     | 1 |
| 4443 | A2M     | ENST00000318602 | p.F155I  | c.463       | 0.013773127 | 6.182 | 1 |

|               |                 |         |        |             |       |   |
|---------------|-----------------|---------|--------|-------------|-------|---|
| 4444 POFUT2   | ENST00000349485 | p.S198L | c.593  | 0.131032809 | 2.932 | 1 |
| 4444 POFUT2   | ENST00000349485 | p.A203V | c.608  | 0.004097615 | 7.931 | 1 |
| 4444 POFUT2   | ENST00000349485 | p.D226N | c.676  | 0.135130424 | 0     | 1 |
| 4445 EPHB4    | ENST00000358173 | p.L649M | c.1945 | 0.148126995 | 2.795 | 1 |
| 4445 EPHB4    | ENST00000358173 | p.K650N | c.1950 | 0.032088391 | 5.156 | 1 |
| 4445 EPHB4    | ENST00000358173 | p.V689I | c.2065 | 0.172132982 | 0     | 1 |
| 4446 ECE1     | ENST00000374893 | p.E667K | c.1999 | 0.076786686 | 0     | 1 |
| 4446 ECE1     | ENST00000374893 | p.P731H | c.2192 | 0.076786686 | 3.703 | 1 |
| 4447 LDLR     | ENST00000557933 | p.D131H | c.391  | 0.012551469 | 6.316 | 1 |
| 4447 LDLR     | ENST00000557933 | p.E174K | c.520  | 0.012551469 | 0     | 1 |
| 4448 SNX7     | ENST00000306121 | p.E88K  | c.262  | 0.005512796 | 7.503 | 1 |
| 4448 SNX7     | ENST00000306121 | p.F113L | c.339  | 0.026975862 | 0     | 1 |
| 4448 SNX7     | ENST00000306121 | p.R172C | c.514  | 0.021463066 | 5.542 | 1 |
| 4449 CETP     | ENST00000200676 | p.Y392F | c.1175 | 0.059954007 | 4.06  | 1 |
| 4449 CETP     | ENST00000200676 | p.V455A | c.1364 | 0.059954007 | 0     | 1 |
| 4450 POU6F1   | ENST00000389243 | p.A248S | c.742  | 0.025980996 | 9.745 | 1 |
| 4450 POU6F1   | ENST00000389243 | p.R285W | c.853  | 1.001165367 | 0     | 1 |
| 4450 POU6F1   | ENST00000389243 | p.R285Q | c.854  | 1.001165367 | 0     | 1 |
| 4451 CD44     | ENST00000428726 | p.A99T  | c.295  | 0.042393885 | 0     | 1 |
| 4451 CD44     | ENST00000428726 | p.A31V  | c.92   | 0.042393885 | 4.56  | 1 |
| 4452 ESR1     | ENST00000440973 | p.H488Y | c.1462 | 0.054787858 | 5.19  | 1 |
| 4452 ESR1     | ENST00000440973 | p.T311M | c.932  | 1.027393929 | 0     | 2 |
| 4453 MMAB     | ENST00000545712 | p.E112K | c.334  | 0.007541149 | 7.051 | 1 |
| 4453 MMAB     | ENST00000545712 | p.M239I | c.717  | 0.007541149 | 0     | 1 |
| 4454 PDK2     | ENST00000503176 | p.S198P | c.592  | 0.039043284 | 4.751 | 1 |
| 4454 PDK2     | ENST00000503176 | p.I236V | c.706  | 0.088468891 | 0     | 1 |
| 4454 PDK2     | ENST00000503176 | p.A278T | c.832  | 0.053238231 | 4.284 | 1 |
| 4455 FASLG    | ENST00000367721 | p.D221N | c.661  | 0.007478683 | 7.063 | 1 |
| 4455 FASLG    | ENST00000367721 | p.H256Y | c.766  | 0.007478683 | 0     | 1 |
| 4456 TOP2A    | ENST00000423485 | p.G448V | c.1343 | 0.120742041 | 3.05  | 1 |
| 4456 TOP2A    | ENST00000423485 | p.R532C | c.1594 | 0.120742041 | 0     | 1 |
| 4457 MAP1LC3C | ENST00000357246 | p.P52L  | c.155  | 0.062891114 | 3.991 | 1 |
| 4457 MAP1LC3C | ENST00000357246 | p.R76C  | c.226  | 0.062891114 | 0     | 1 |
| 4458 PREP     | ENST00000369110 | p.F186L | c.556  | 0.016792956 | 0     | 1 |
| 4458 PREP     | ENST00000369110 | p.E239K | c.715  | 0.016792956 | 5.896 | 1 |
| 4459 KDR      | ENST00000263923 | p.E685K | c.2053 | 0.080818723 | 0     | 1 |
| 4459 KDR      | ENST00000263923 | p.T723I | c.2168 | 0.048052076 | 4.428 | 1 |
| 4459 KDR      | ENST00000263923 | p.R725C | c.2173 | 0.035959363 | 4.863 | 1 |
| 4460 F11      | ENST00000403665 | p.P41S  | c.121  | 0.140139633 | 0     | 1 |
| 4460 F11      | ENST00000403665 | p.L118I | c.352  | 0.072448744 | 3.888 | 1 |
| 4460 F11      | ENST00000403665 | p.F188L | c.564  | 0.077497702 | 3.784 | 1 |
| 4461 IRS1     | ENST00000305123 | p.E224K | c.670  | 0.014751444 | 6.083 | 1 |
| 4461 IRS1     | ENST00000305123 | p.P233L | c.698  | 0.005605272 | 7.479 | 1 |
| 4461 IRS1     | ENST00000305123 | p.S261I | c.782  | 0.020356716 | 0     | 1 |
| 4462 MITD1    | ENST00000289359 | p.R126I | c.377  | 0.016527359 | 5.919 | 1 |
| 4462 MITD1    | ENST00000289359 | p.S190F | c.569  | 0.016527359 | 0     | 1 |
| 4463 ARHGEF11 | ENST00000368194 | p.A869V | c.2606 | 0.035722144 | 6.392 | 1 |
| 4463 ARHGEF11 | ENST00000368194 | p.A963V | c.2888 | 2.011907381 | 0     | 3 |
| 4464 HGFAC    | ENST00000511533 | p.G441W | c.1321 | 0.008065614 | 6.954 | 1 |

|              |                 |                   |           |             |       |   |
|--------------|-----------------|-------------------|-----------|-------------|-------|---|
| 4464 HGFAC   | ENST00000511533 | p.V465I           | c.1393    | 0.008065614 | 0     | 1 |
| 4465 ITGA4   | ENST00000397033 | p.R261W           | c.781     | 0.018211581 | 5.779 | 1 |
| 4465 ITGA4   | ENST00000397033 | p.D287N           | c.859     | 0.018211581 | 0     | 1 |
| 4466 SORT1   | ENST00000256637 | p.N473S           | c.1418    | 0.114546081 | 0     | 1 |
| 4466 SORT1   | ENST00000256637 | p.P503S           | c.1507    | 0.114546081 | 3.126 | 1 |
| 4467 SYK     | ENST00000375754 | p.M343I           | c.1029    | 0.072947381 | 3.777 | 1 |
| 4467 SYK     | ENST00000375754 | p.A146G           | c.437     | 0.072947381 | 0     | 1 |
| 4468 IL1R1   | ENST00000410023 | p.P43L            | c.128     | 1.054787858 | 0     | 2 |
| 4468 IL1R1   | ENST00000410023 | p.E79D            | c.237     | 0.109575715 | 4.19  | 1 |
| 4469 SHMT2   | ENST00000328923 | p.F79L            | c.237     | 0.016980232 | 5.88  | 1 |
| 4469 SHMT2   | ENST00000328923 | p.H279L           | c.836     | 0.016980232 | 0     | 1 |
| 4470 CHIA    | ENST00000369740 | p.A57T            | c.169     | 0.008240799 | 6.923 | 1 |
| 4470 CHIA    | ENST00000369740 | p.A32D            | c.95      | 0.008240799 | 0     | 1 |
| 4471 GLUD1   | ENST00000277865 | p.D414H           | c.1240    | 0.009971319 | 6.648 | 1 |
| 4471 GLUD1   | ENST00000277865 | p.T536I           | c.1607    | 0.009971319 | 0     | 1 |
| 4472 PRKAB1  | ENST00000229328 | p.R78P            | c.233     | 0.021642335 | 0     | 1 |
| 4472 PRKAB1  | ENST00000229328 | p.E120Q           | c.358     | 0.021642335 | 5.53  | 1 |
| 4473 INMT    | ENST00000013222 | p.G56V            | c.167     | 0.189425571 | 0     | 1 |
| 4473 INMT    | ENST00000013222 | p.S77F            | c.230     | 0.135101031 | 2.975 | 1 |
| 4473 INMT    | ENST00000013222 | p.Q79K            | c.235     | 0.070156679 | 4.006 | 1 |
| 4474 CDC37   | ENST00000222005 | p.L341F           | c.1021    | 0.042247214 | 4.565 | 1 |
| 4474 CDC37   | ENST00000222005 | p.L301P           | c.902     | 0.042247214 | 0     | 1 |
| 4475 TP53I3  | ENST00000238721 | p.L44S            | c.131     | 0.005347202 | 7.547 | 1 |
| 4475 TP53I3  | ENST00000238721 | p.Q95P            | c.284     | 0.005347202 | 0     | 1 |
| 4476 FLT4    | ENST00000261937 | p.T168M           | c.503     | 0.019586453 | 5.674 | 1 |
| 4476 FLT4    | ENST00000261937 | p.M191I           | c.573     | 0.019586453 | 0     | 1 |
| 4477 CDK4    | ENST00000257904 | p.G48in_frame_del | c.134_132 | 0.014179987 | 0     | 1 |
| 4477 CDK4    | ENST00000257904 | p.R82Q            | c.245     | 0.014179987 | 6.14  | 1 |
| 4478 HMOX1   | ENST00000216117 | p.P76H            | c.227     | 0.169106029 | 0     | 1 |
| 4478 HMOX1   | ENST00000216117 | p.R185C           | c.553     | 0.169106029 | 2.564 | 1 |
| 4479 F3      | ENST00000334047 | p.N43D            | c.127     | 0.032622248 | 0     | 1 |
| 4479 F3      | ENST00000334047 | p.E127D           | c.381     | 0.032622248 | 4.938 | 1 |
| 4480 FLNC    | ENST00000325888 | p.P1790L          | c.5369    | 0.09297586  | 3.427 | 1 |
| 4480 FLNC    | ENST00000325888 | p.G1820S          | c.5458    | 0.09297586  | 0     | 1 |
| 4481 AADAT   | ENST00000353187 | p.S11G            | c.31      | 0.018853811 | 5.729 | 1 |
| 4481 AADAT   | ENST00000353187 | p.H287L           | c.860     | 0.018853811 | 0     | 1 |
| 4482 NPY1R   | ENST00000296533 | p.S130F           | c.389     | 0.115422789 | 0     | 1 |
| 4482 NPY1R   | ENST00000296533 | p.I162S           | c.485     | 0.115422789 | 3.115 | 1 |
| 4483 NFASC   | ENST00000367172 | p.I43L            | c.127     | 0.064168097 | 4.962 | 1 |
| 4483 NFASC   | ENST00000367172 | p.A120T           | c.358     | 1.032084048 | 0     | 2 |
| 4484 EPHB2   | ENST00000400191 | p.V88M            | c.262     | 0.159690672 | 0     | 1 |
| 4484 EPHB2   | ENST00000400191 | p.V163A           | c.488     | 0.102038461 | 3.382 | 1 |
| 4484 EPHB2   | ENST00000400191 | p.V190M           | c.568     | 0.079550969 | 3.971 | 1 |
| 4485 AHCYL1  | ENST00000369799 | p.S400P           | c.1198    | 0.016481599 | 0     | 1 |
| 4485 AHCYL1  | ENST00000369799 | p.L445W           | c.1334    | 0.016481599 | 5.923 | 1 |
| 4486 S100A10 | ENST00000368811 | p.M35R            | c.104     | 0.007437327 | 0     | 1 |
| 4486 S100A10 | ENST00000368811 | p.P2L             | c.5       | 0.007437327 | 7.071 | 1 |
| 4487 MERTK   | ENST00000295408 | p.S423F           | c.1268    | 0.541910159 | 2.954 | 1 |
| 4487 MERTK   | ENST00000295408 | p.V459A           | c.1376    | 1.165675513 | 0     | 2 |



|      |         |                 |                      |           |             |       |   |
|------|---------|-----------------|----------------------|-----------|-------------|-------|---|
| 4487 | MERTK   | ENST00000295408 | p.R460G              | c.1378    | 0.357061918 | 4.771 | 1 |
| 4488 | IL20RA  | ENST00000316649 | p.P131S              | c.391     | 1.003070358 | 0     | 1 |
| 4488 | IL20RA  | ENST00000316649 | p.P131L              | c.392     | 1.003070358 | 0     | 1 |
| 4488 | IL20RA  | ENST00000316649 | p.V222I              | c.664     | 0.003809982 | 9.036 | 1 |
| 4488 | IL20RA  | ENST00000316649 | p.R228H              | c.683     | 0.002330734 | 9.745 | 1 |
| 4489 | F5      | ENST00000367796 | p.F34L               | c.102     | 0.244572169 | 2.274 | 1 |
| 4489 | F5      | ENST00000367796 | p.I98V               | c.292     | 0.342556614 | 0     | 1 |
| 4489 | F5      | ENST00000367796 | p.I112V              | c.334     | 0.013112929 | 8.798 | 1 |
| 4489 | F5      | ENST00000367796 | p.I117F              | c.349     | 0.018182607 | 8.953 | 1 |
| 4489 | F5      | ENST00000367796 | p.S120T              | c.359     | 0.050886645 | 7.501 | 1 |
| 4489 | F5      | ENST00000367796 | p.E124D              | c.372     | 0.01071446  | 9.716 | 1 |
| 4489 | F5      | ENST00000367796 | p.E151V              | c.452     | 0.220550564 | 3.002 | 1 |
| 4490 | SOCS2   | ENST00000515556 | p.G102R              | c.304     | 0.012242144 | 0     | 1 |
| 4490 | SOCS2   | ENST00000515556 | p.E28D               | c.84      | 0.012242144 | 6.352 | 1 |
| 4491 | PNLIP   | ENST00000369221 | p.R54C               | c.160     | 1.040638755 | 5.621 | 2 |
| 4491 | PNLIP   | ENST00000369221 | p.R23K               | c.68      | 1.040638755 | 0     | 2 |
| 4492 | PDE8A   | ENST00000394553 | p.D663G              | c.1988    | 0.152936005 | 0     | 1 |
| 4492 | PDE8A   | ENST00000394553 | p.R719Q              | c.2156    | 0.152936005 | 2.709 | 1 |
| 4493 | PVRL4   | ENST00000368012 | p.Q77H               | c.231     | 0.006483551 | 0     | 1 |
| 4493 | PVRL4   | ENST00000368012 | p.E124G              | c.371     | 0.006483551 | 7.269 | 1 |
| 4494 | CWC27   | ENST00000381070 | p.R95W               | c.283     | 0.094339123 | 3.406 | 1 |
| 4494 | CWC27   | ENST00000381070 | p.T116R              | c.347     | 0.094339123 | 0     | 1 |
| 4495 | PPP2R1A | ENST00000322088 | p.A232T              | c.694     | 0.11426469  | 3.149 | 1 |
| 4495 | PPP2R1A | ENST00000322088 | p.Q237R              | c.710     | 0.015104365 | 6.203 | 1 |
| 4495 | PPP2R1A | ENST00000322088 | p.A273V              | c.818     | 0.126308519 | 0     | 1 |
| 4496 | EGFR    | ENST00000275493 | p.I475V              | c.1423    | 0.027093405 | 0     | 1 |
| 4496 | EGFR    | ENST00000275493 | p.G503C              | c.1507    | 0.011800567 | 6.405 | 1 |
| 4496 | EGFR    | ENST00000275493 | p.P512S              | c.1534    | 0.015292838 | 6.031 | 1 |
| 4497 | MTOR    | ENST00000361445 | p.E2033V             | c.6098    | 0.027035522 | 5.209 | 1 |
| 4497 | MTOR    | ENST00000361445 | p.W2101L             | c.6302    | 0.027035522 | 0     | 1 |
| 4498 | TP63    | ENST00000264731 | p.G349A              | c.1046    | 1.071790984 | 0     | 1 |
| 4498 | TP63    | ENST00000264731 | p.G349E              | c.1046    | 1.071790984 | 0     | 1 |
| 4498 | TP63    | ENST00000264731 | p.KSA188in_frame_del | c.559_567 | 0.125782228 | 3.991 | 1 |
| 4498 | TP63    | ENST00000264731 | p.Y194S              | c.581     | 0.01779974  | 6.812 | 1 |
| 4499 | GABBR2  | ENST00000259455 | p.S227L              | c.680     | 0.010836179 | 6.528 | 1 |
| 4499 | GABBR2  | ENST00000259455 | p.R249W              | c.745     | 0.010836179 | 0     | 1 |
| 4500 | CLIC3   | ENST00000494426 | p.E79K               | c.235     | 0.167356907 | 2.579 | 1 |
| 4500 | CLIC3   | ENST00000494426 | p.R27P               | c.80      | 0.167356907 | 0     | 1 |
| 4501 | DPP7    | ENST00000371579 | p.E354K              | c.1060    | 0.024948655 | 0     | 1 |
| 4501 | DPP7    | ENST00000371579 | p.A193V              | c.578     | 0.015690118 | 5.994 | 1 |
| 4501 | DPP7    | ENST00000371579 | p.G194S              | c.580     | 0.009258537 | 6.755 | 1 |
| 4502 | PON1    | ENST00000542556 | p.A63T               | c.187     | 0.052446852 | 4.253 | 1 |
| 4502 | PON1    | ENST00000542556 | p.L129F              | c.385     | 0.052446852 | 0     | 1 |
| 4503 | CPN1    | ENST00000370418 | p.A139V              | c.416     | 0.064704058 | 0     | 1 |
| 4503 | CPN1    | ENST00000370418 | p.R27H               | c.80      | 0.064704058 | 3.95  | 1 |
| 4504 | CHKA    | ENST00000265689 | p.K429N              | c.1287    | 0.078781462 | 3.666 | 1 |
| 4504 | CHKA    | ENST00000265689 | p.I263T              | c.788     | 0.078781462 | 0     | 1 |
| 4505 | EFNB3   | ENST00000226091 | p.P63L               | c.188     | 0.013668512 | 6.193 | 1 |
| 4505 | EFNB3   | ENST00000226091 | p.R66Q               | c.197     | 0.008099227 | 6.948 | 1 |

|               |                 |          |        |             |       |   |
|---------------|-----------------|----------|--------|-------------|-------|---|
| 4505 EFN3     | ENST00000226091 | p.R106H  | c.317  | 0.021767739 | 0     | 1 |
| 4506 MARK1    | ENST00000366917 | p.V238G  | c.713  | 0.002746862 | 0     | 1 |
| 4506 MARK1    | ENST00000366917 | p.V293A  | c.878  | 0.002746862 | 8.508 | 1 |
| 4507 TTBK1    | ENST00000259750 | p.Y169C  | c.506  | 0.037473122 | 4.738 | 1 |
| 4507 TTBK1    | ENST00000259750 | p.W310L  | c.929  | 0.037473122 | 0     | 1 |
| 4508 DNMT1    | ENST00000359526 | p.E448K  | c.1342 | 2.011086901 | 0     | 3 |
| 4508 DNMT1    | ENST00000359526 | p.D599N  | c.1795 | 0.04744069  | 6.495 | 1 |
| 4509 CHI3L2   | ENST00000445067 | p.G187W  | c.559  | 0.002465336 | 8.664 | 1 |
| 4509 CHI3L2   | ENST00000445067 | p.P239S  | c.715  | 0.002465336 | 0     | 1 |
| 4510 TF       | ENST00000402696 | p.W363C  | c.1089 | 0.038969843 | 0     | 1 |
| 4510 TF       | ENST00000402696 | p.A605D  | c.1814 | 0.00882615  | 6.824 | 1 |
| 4510 TF       | ENST00000402696 | p.V616I  | c.1846 | 0.030143693 | 5.052 | 1 |
| 4511 MASP1    | ENST00000296280 | p.R57W   | c.169  | 0.073099229 | 0     | 1 |
| 4511 MASP1    | ENST00000296280 | p.M136I  | c.408  | 0.073099229 | 3.774 | 1 |
| 4512 CES1     | ENST00000360526 | p.G43E   | c.128  | 0.008722758 | 6.841 | 1 |
| 4512 CES1     | ENST00000360526 | p.A160S  | c.478  | 0.008722758 | 0     | 1 |
| 4513 TXNDC12  | ENST00000371626 | p.K75N   | c.225  | 0.081559684 | 3.616 | 1 |
| 4513 TXNDC12  | ENST00000371626 | p.E145K  | c.433  | 0.081559684 | 0     | 1 |
| 4514 DUSP22   | ENST00000419235 | p.C84F   | c.251  | 0.141905263 | 2.817 | 1 |
| 4514 DUSP22   | ENST00000419235 | p.G11D   | c.32   | 0.141905263 | 0     | 1 |
| 4515 F7       | ENST00000375581 | p.G222E  | c.665  | 0.135951772 | 5.42  | 1 |
| 4515 F7       | ENST00000375581 | p.A266T  | c.796  | 2.04197706  | 0     | 2 |
| 4515 F7       | ENST00000375581 | p.A266V  | c.797  | 2.04197706  | 0     | 1 |
| 4515 F7       | ENST00000375581 | p.D316H  | c.946  | 0.121740835 | 5.747 | 1 |
| 4516 SHBG     | ENST00000380450 | p.A57T   | c.169  | 0.138216332 | 0     | 1 |
| 4516 SHBG     | ENST00000380450 | p.L172I  | c.514  | 0.138216332 | 2.855 | 1 |
| 4517 P2RY12   | ENST00000302632 | p.D121N  | c.361  | 1.1016724   | 0     | 2 |
| 4517 P2RY12   | ENST00000302632 | p.R231S  | c.693  | 0.2033448   | 3.298 | 1 |
| 4518 CASQ2    | ENST00000261448 | p.D163H  | c.487  | 0.070756181 | 0     | 1 |
| 4518 CASQ2    | ENST00000261448 | p.R251H  | c.752  | 0.070756181 | 3.821 | 1 |
| 4519 CNOT1    | ENST00000317147 | p.N2012T | c.6035 | 0.037551127 | 0     | 1 |
| 4519 CNOT1    | ENST00000317147 | p.T2055M | c.6164 | 0.037551127 | 4.735 | 1 |
| 4520 TF       | ENST00000402696 | p.E231D  | c.693  | 0.098686736 | 3.341 | 1 |
| 4520 TF       | ENST00000402696 | p.S317C  | c.950  | 0.098686736 | 0     | 1 |
| 4521 SUB1     | ENST00000265073 | p.R75H   | c.224  | 0.068583246 | 3.866 | 1 |
| 4521 SUB1     | ENST00000265073 | p.D76N   | c.226  | 0.011056204 | 6.499 | 1 |
| 4521 SUB1     | ENST00000265073 | p.K126R  | c.377  | 0.07963945  | 0     | 1 |
| 4522 CHEK2    | ENST00000382580 | p.A201V  | c.602  | 0.12137056  | 0     | 1 |
| 4522 CHEK2    | ENST00000382580 | p.R224H  | c.671  | 0.052932421 | 4.34  | 1 |
| 4522 CHEK2    | ENST00000382580 | p.D246E  | c.738  | 0.075547817 | 3.796 | 1 |
| 4523 ITGAX    | ENST00000562522 | p.P919L  | c.2756 | 0.008338479 | 0     | 1 |
| 4523 ITGAX    | ENST00000562522 | p.S1077F | c.3230 | 0.008338479 | 6.906 | 1 |
| 4524 ITGAX    | ENST00000562522 | p.K196N  | c.588  | 0.015581738 | 6.004 | 1 |
| 4524 ITGAX    | ENST00000562522 | p.A231T  | c.691  | 0.015581738 | 0     | 1 |
| 4525 CDK2     | ENST00000553376 | p.K34T   | c.101  | 0.02456929  | 0     | 1 |
| 4525 CDK2     | ENST00000553376 | p.G13D   | c.38   | 0.02456929  | 5.347 | 1 |
| 4527 HSD17B11 | ENST00000358290 | p.G47A   | c.140  | 0.018517075 | 0     | 1 |
| 4527 HSD17B11 | ENST00000358290 | p.P239S  | c.715  | 0.018517075 | 5.755 | 1 |
| 4528 DLD      | ENST00000205402 | p.G246A  | c.737  | 0.009156424 | 0     | 1 |

|               |                 |           |           |             |       |   |
|---------------|-----------------|-----------|-----------|-------------|-------|---|
| 4528 DLD      | ENST00000205402 | p.T276K   | c.827     | 0.009156424 | 6.771 | 1 |
| 4529 HSP90AB1 | ENST00000353801 | p.I44M    | c.132     | 0.013239569 | 6.239 | 1 |
| 4529 HSP90AB1 | ENST00000353801 | p.K72N    | c.216     | 0.013239569 | 0     | 1 |
| 4531 NPR3     | ENST00000265074 | p.S336F   | c.1007    | 0.014884969 | 0     | 1 |
| 4531 NPR3     | ENST00000265074 | p.E359Q   | c.1075    | 0.014884969 | 6.07  | 1 |
| 4532 DNPEP    | ENST00000523282 | p.K387R   | c.1160    | 0.077912575 | 3.682 | 1 |
| 4532 DNPEP    | ENST00000523282 | p.P419L   | c.1256    | 0.077912575 | 0     | 1 |
| 4533 TTN      | ENST00000589042 | p.H14348Y | c.43042   | 0.022749837 | 5.458 | 1 |
| 4533 TTN      | ENST00000589042 | p.G14370R | c.43108   | 0.022749837 | 0     | 1 |
| 4534 GDNF     | ENST00000427982 | p.V144I   | c.430     | 0.006176477 | 0     | 1 |
| 4534 GDNF     | ENST00000427982 | p.H215R   | c.644     | 0.006176477 | 7.339 | 1 |
| 4535 SLK      | ENST00000369755 | p.I82M    | c.246     | 0.076780302 | 3.809 | 1 |
| 4535 SLK      | ENST00000369755 | p.C86S    | c.257     | 0.081583774 | 3.715 | 1 |
| 4535 SLK      | ENST00000369755 | p.I151V   | c.451     | 0.147497811 | 0     | 1 |
| 4536 CUL1     | ENST00000602748 | p.P256K   | c.766_767 | 0.016980232 | 0     | 1 |
| 4536 CUL1     | ENST00000602748 | p.R321H   | c.962     | 0.016980232 | 5.88  | 1 |
| 4537 NPY1R    | ENST00000296533 | p.K114N   | c.342     | 0.116064607 | 0     | 1 |
| 4537 NPY1R    | ENST00000296533 | p.I175N   | c.524     | 0.116064607 | 3.107 | 1 |
| 4538 CTNND1   | ENST00000428599 | p.E676K   | c.2026    | 0.008280881 | 6.916 | 1 |
| 4538 CTNND1   | ENST00000428599 | p.V720A   | c.2159    | 0.008280881 | 0     | 1 |
| 4539 ARHGAP25 | ENST00000409202 | p.I48V    | c.142     | 0.192375903 | 2.378 | 1 |
| 4539 ARHGAP25 | ENST00000409202 | p.R123H   | c.368     | 0.192375903 | 0     | 1 |
| 4540 GNMT     | ENST00000372808 | p.G131D   | c.392     | 0.016898043 | 5.887 | 1 |
| 4540 GNMT     | ENST00000372808 | p.A164V   | c.491     | 0.016898043 | 0     | 1 |
| 4541 ABL1     | ENST00000372348 | p.D400Y   | c.1198    | 0.138384077 | 2.906 | 1 |
| 4541 ABL1     | ENST00000372348 | p.F401L   | c.1203    | 0.042208491 | 4.747 | 1 |
| 4541 ABL1     | ENST00000372348 | p.Y459H   | c.1375    | 0.170655748 | 0     | 1 |
| 4542 BMX      | ENST00000348343 | p.H534R   | c.1601    | 0.023980408 | 5.382 | 1 |
| 4542 BMX      | ENST00000348343 | p.S593L   | c.1778    | 0.023980408 | 0     | 1 |
| 4543 BIRC7    | ENST00000217169 | p.V263I   | c.787     | 0.032106295 | 0     | 1 |
| 4543 BIRC7    | ENST00000217169 | p.R294H   | c.881     | 0.032106295 | 4.961 | 1 |
| 4544 FGA      | ENST00000302053 | p.H741Y   | c.2221    | 0.082469244 | 3.6   | 1 |
| 4544 FGA      | ENST00000302053 | p.L863P   | c.2588    | 0.082469244 | 0     | 1 |
| 4545 GGA3     | ENST00000245541 | p.L49M    | c.145     | 0.051760666 | 0     | 1 |
| 4545 GGA3     | ENST00000245541 | p.G6K     | c.17_16   | 0.051760666 | 4.272 | 1 |
| 4546 MVD      | ENST00000301012 | p.A176S   | c.526     | 0.028577034 | 5.129 | 1 |
| 4546 MVD      | ENST00000301012 | p.M215I   | c.645     | 0.009151045 | 7.655 | 1 |
| 4546 MVD      | ENST00000301012 | p.R27H    | c.80      | 0.033538561 | 0     | 1 |
| 4547 FAP      | ENST00000188790 | p.L206H   | c.617     | 0.015592542 | 0     | 1 |
| 4547 FAP      | ENST00000188790 | p.L296H   | c.887     | 0.015592542 | 6.003 | 1 |
| 4548 NOS2     | ENST00000313735 | p.M444I   | c.1332    | 0.012006837 | 0     | 1 |
| 4548 NOS2     | ENST00000313735 | p.H477Y   | c.1429    | 0.012006837 | 6.38  | 1 |
| 4549 SSU72    | ENST00000291386 | p.V42A    | c.125     | 0.019263318 | 5.698 | 1 |
| 4549 SSU72    | ENST00000291386 | p.N15K    | c.45      | 0.019263318 | 0     | 1 |
| 4550 PAPOLG   | ENST00000238714 | p.L145V   | c.433     | 0.00367765  | 8.087 | 1 |
| 4550 PAPOLG   | ENST00000238714 | p.R146K   | c.437     | 0.005719085 | 7.45  | 1 |
| 4550 PAPOLG   | ENST00000238714 | p.L167V   | c.499     | 0.009396735 | 0     | 1 |
| 4551 PTGIS    | ENST00000244043 | p.R359H   | c.1076    | 0.006900899 | 0     | 1 |
| 4551 PTGIS    | ENST00000244043 | p.Y73H    | c.217     | 0.006900899 | 7.179 | 1 |

|      |        |                 |           |         |             |       |   |
|------|--------|-----------------|-----------|---------|-------------|-------|---|
| 4552 | APAF1  | ENST00000551964 | p.S780I   | c.2339  | 0.035158078 | 0     | 1 |
| 4552 | APAF1  | ENST00000551964 | p.S829C   | c.2485  | 0.035158078 | 4.83  | 1 |
| 4553 | TLR8   | ENST00000311912 | p.T208N   | c.623   | 0.139757731 | 2.839 | 1 |
| 4553 | TLR8   | ENST00000311912 | p.S230Y   | c.689   | 0.139757731 | 0     | 1 |
| 4554 | TTN    | ENST00000589042 | p.E28489Q | c.85465 | 0.049446081 | 0     | 1 |
| 4554 | TTN    | ENST00000589042 | p.P28536H | c.85607 | 0.049446081 | 4.338 | 1 |
| 4555 | GNLY   | ENST00000526018 | p.D69N    | c.205   | 0.164026407 | 0     | 1 |
| 4555 | GNLY   | ENST00000526018 | p.V31M    | c.91    | 0.164026407 | 2.608 | 1 |
| 4556 | ITGB4  | ENST00000450894 | p.G1128D  | c.3383  | 0.156697479 | 3.725 | 1 |
| 4556 | ITGB4  | ENST00000450894 | p.R1158M  | c.3473  | 0.149534011 | 3.795 | 1 |
| 4556 | ITGB4  | ENST00000450894 | p.A1198T  | c.3592  | 1.147667527 | 0     | 2 |
| 4557 | PDE4B  | ENST00000341517 | p.D512N   | c.1534  | 0.022686848 | 0     | 1 |
| 4557 | PDE4B  | ENST00000341517 | p.R669S   | c.2007  | 0.022686848 | 5.462 | 1 |
| 4558 | XRCC5  | ENST00000392132 | p.A9T     | c.25    | 0.081917305 | 4.9   | 1 |
| 4558 | XRCC5  | ENST00000392132 | p.H131Y   | c.391   | 1.033492921 | 0     | 1 |
| 4558 | XRCC5  | ENST00000392132 | p.H131P   | c.392   | 1.033492921 | 0     | 1 |
| 4559 | FGF10  | ENST00000264664 | p.N159K   | c.477   | 0.017169597 | 5.864 | 1 |
| 4559 | FGF10  | ENST00000264664 | p.K195I   | c.584   | 0.017169597 | 0     | 1 |
| 4560 | EXOSC2 | ENST00000372358 | p.E232D   | c.696   | 0.002796814 | 8.482 | 1 |
| 4560 | EXOSC2 | ENST00000372358 | p.R238W   | c.712   | 0.003035185 | 8.364 | 1 |
| 4560 | EXOSC2 | ENST00000372358 | p.D270N   | c.808   | 0.005831999 | 0     | 1 |
| 4561 | PUS10  | ENST00000316752 | p.L116I   | c.346   | 0.011533706 | 6.438 | 1 |
| 4561 | PUS10  | ENST00000316752 | p.P22S    | c.64    | 0.011533706 | 0     | 1 |
| 4562 | AGO1   | ENST00000373204 | p.P286L   | c.857   | 0.112734422 | 3.149 | 1 |
| 4562 | AGO1   | ENST00000373204 | p.P321L   | c.962   | 0.112734422 | 0     | 1 |
| 4563 | NDRG2  | ENST00000556147 | p.P160L   | c.479   | 0.03619665  | 4.788 | 1 |
| 4563 | NDRG2  | ENST00000556147 | p.D263E   | c.789   | 0.03619665  | 0     | 1 |
| 4564 | FST    | ENST00000256759 | p.T213N   | c.638   | 0.011517728 | 0     | 1 |
| 4564 | FST    | ENST00000256759 | p.Y235H   | c.703   | 0.011517728 | 6.44  | 1 |
| 4565 | CANT1  | ENST00000591773 | p.A101V   | c.302   | 0.058964891 | 0     | 1 |
| 4565 | CANT1  | ENST00000591773 | p.L136M   | c.406   | 0.058964891 | 4.084 | 1 |
| 4566 | MC4R   | ENST00000299766 | p.M79I    | c.237   | 0.029779354 | 5.226 | 1 |
| 4566 | MC4R   | ENST00000299766 | p.R147M   | c.440   | 0.141264899 | 0     | 1 |
| 4566 | MC4R   | ENST00000299766 | p.A244V   | c.731   | 0.117606616 | 3.126 | 1 |
| 4567 | OPRK1  | ENST00000265572 | p.S44L    | c.131   | 0.174705871 | 2.517 | 1 |
| 4567 | OPRK1  | ENST00000265572 | p.S123F   | c.368   | 0.174705871 | 0     | 1 |
| 4568 | LRRC4  | ENST00000249363 | p.R155H   | c.464   | 0.010033717 | 6.639 | 1 |
| 4568 | LRRC4  | ENST00000249363 | p.E224G   | c.671   | 0.010033717 | 0     | 1 |
| 4569 | MVK    | ENST00000228510 | p.T37A    | c.109   | 0.034196678 | 0     | 1 |
| 4569 | MVK    | ENST00000228510 | p.P11L    | c.32    | 0.034196678 | 4.87  | 1 |
| 4570 | PDIA3  | ENST00000300289 | p.R344C   | c.1030  | 1.005497533 | 0     | 2 |
| 4570 | PDIA3  | ENST00000300289 | p.Y222H   | c.664   | 0.010995065 | 7.507 | 1 |
| 4571 | CD86   | ENST00000330540 | p.C40Y    | c.119   | 0.003071161 | 0     | 1 |
| 4571 | CD86   | ENST00000330540 | p.S90L    | c.269   | 0.003071161 | 8.347 | 1 |
| 4572 | CD1A   | ENST00000289429 | p.Q220R   | c.659   | 0.007905103 | 6.983 | 1 |
| 4572 | CD1A   | ENST00000289429 | p.V222L   | c.664   | 0.072443497 | 3.787 | 1 |
| 4572 | CD1A   | ENST00000289429 | p.A264T   | c.790   | 0.0803486   | 0     | 1 |
| 4573 | CPOX   | ENST00000264193 | p.S356R   | c.1068  | 0.045154075 | 0     | 1 |
| 4573 | CPOX   | ENST00000264193 | p.E302G   | c.905   | 0.045154075 | 4.469 | 1 |

|      |          |                 |                    |             |             |       |   |
|------|----------|-----------------|--------------------|-------------|-------------|-------|---|
| 4574 | ABL1     | ENST00000372348 | p.F91V             | c.271       | 1.181872585 | 0     | 2 |
| 4574 | ABL1     | ENST00000372348 | p.V130L            | c.388       | 0.363745171 | 2.459 | 1 |
| 4575 | GBP1     | ENST00000370473 | p.L67M             | c.199       | 0.112578247 | 0     | 1 |
| 4575 | GBP1     | ENST00000370473 | p.K246T            | c.737       | 0.112578247 | 3.151 | 1 |
| 4576 | GAS6     | ENST00000357389 | p.I480V            | c.1438      | 0.003865846 | 8.015 | 1 |
| 4576 | GAS6     | ENST00000357389 | p.A554S            | c.1660      | 0.003865846 | 0     | 1 |
| 4577 | HDAC3    | ENST00000305264 | p.V90I             | c.268       | 0.012877533 | 0     | 1 |
| 4577 | HDAC3    | ENST00000305264 | p.E140K            | c.418       | 0.012877533 | 6.279 | 1 |
| 4578 | TXNL4B   | ENST00000423037 | p.N86D             | c.256       | 0.2913853   | 2.779 | 1 |
| 4578 | TXNL4B   | ENST00000423037 | p.E23Q             | c.67        | 1.14569265  | 0     | 1 |
| 4578 | TXNL4B   | ENST00000423037 | p.E23D             | c.69        | 1.14569265  | 0     | 1 |
| 4579 | CSNK1E   | ENST00000400206 | p.H126Y            | c.376       | 0.007796271 | 7.003 | 1 |
| 4579 | CSNK1E   | ENST00000400206 | p.G175S            | c.523       | 0.007796271 | 0     | 1 |
| 4580 | IDE      | ENST00000265986 | p.F372Y            | c.1115      | 0.19582789  | 0     | 1 |
| 4580 | IDE      | ENST00000265986 | p.F317C            | c.950       | 0.112581327 | 3.279 | 1 |
| 4580 | IDE      | ENST00000265986 | p.D321E            | c.963       | 0.01676723  | 6.139 | 1 |
| 4580 | IDE      | ENST00000265986 | p.P330H            | c.989       | 0.096447213 | 3.669 | 1 |
| 4581 | TNFRSF21 | ENST00000296861 | p.K582in_frame_del | c.1746_1744 | 0.170957633 | 0     | 1 |
| 4581 | TNFRSF21 | ENST00000296861 | p.E630K            | c.1888      | 0.151607061 | 2.754 | 1 |
| 4581 | TNFRSF21 | ENST00000296861 | p.L644M            | c.1930      | 0.026086069 | 5.46  | 1 |
| 4582 | GC       | ENST00000504199 | p.F178S            | c.533       | 0.007976657 | 6.97  | 1 |
| 4582 | GC       | ENST00000504199 | p.S200N            | c.599       | 0.007976657 | 0     | 1 |
| 4583 | CD46     | ENST00000322875 | p.Y247C            | c.740       | 0.012693236 | 0     | 1 |
| 4583 | CD46     | ENST00000322875 | p.S274I            | c.821       | 0.007021524 | 7.154 | 1 |
| 4583 | CD46     | ENST00000322875 | p.T275N            | c.824       | 0.005671712 | 7.462 | 1 |
| 4584 | SLC3A2   | ENST00000377892 | p.N342S            | c.1025      | 0.058924033 | 4.085 | 1 |
| 4584 | SLC3A2   | ENST00000377892 | p.A478V            | c.1433      | 0.058924033 | 0     | 1 |
| 4585 | MGAM     | ENST00000475668 | p.M1266T           | c.3797      | 0.05440941  | 0     | 1 |
| 4585 | MGAM     | ENST00000475668 | p.P2490H           | c.7469      | 0.05440941  | 4.2   | 1 |
| 4586 | SH3GL3   | ENST00000324537 | p.G99S             | c.295       | 1.00994371  | 0     | 2 |
| 4586 | SH3GL3   | ENST00000324537 | p.E134K            | c.400       | 0.019887421 | 6.652 | 1 |
| 4587 | RAN      | ENST00000448750 | p.H48Y             | c.142       | 0.00839066  | 6.897 | 1 |
| 4587 | RAN      | ENST00000448750 | p.T50I             | c.149       | 0.008674522 | 6.849 | 1 |
| 4587 | RAN      | ENST00000448750 | p.M197I            | c.591       | 0.017065182 | 0     | 1 |
| 4588 | C1S      | ENST00000328916 | p.T121M            | c.362       | 0.013649576 | 6.195 | 1 |
| 4588 | C1S      | ENST00000328916 | p.P160Q            | c.479       | 0.013649576 | 0     | 1 |
| 4589 | ACE2     | ENST00000427411 | p.K458T            | c.1373      | 0.007850499 | 0     | 1 |
| 4589 | ACE2     | ENST00000427411 | p.R204I            | c.611       | 0.007850499 | 6.993 | 1 |
| 4590 | OGG1     | ENST00000302036 | p.W47L             | c.140       | 0.052229185 | 0     | 1 |
| 4590 | OGG1     | ENST00000302036 | p.F142L            | c.426       | 0.052229185 | 4.259 | 1 |
| 4591 | POLD2    | ENST00000452185 | p.A69S             | c.205       | 0.00298511  | 8.388 | 1 |
| 4591 | POLD2    | ENST00000452185 | p.C91W             | c.273       | 0.00298511  | 0     | 1 |
| 4592 | TYW5     | ENST00000354611 | p.R108Q            | c.323       | 0.081052472 | 3.625 | 1 |
| 4592 | TYW5     | ENST00000354611 | p.R149Q            | c.446       | 0.083299136 | 0     | 1 |
| 4592 | TYW5     | ENST00000354611 | p.K174Q            | c.520       | 0.002246664 | 8.798 | 1 |
| 4593 | CETP     | ENST00000200676 | p.E133K            | c.397       | 0.009698652 | 6.688 | 1 |
| 4593 | CETP     | ENST00000200676 | p.D135N            | c.403       | 0.009678505 | 6.691 | 1 |
| 4593 | CETP     | ENST00000200676 | p.F184L            | c.550       | 0.019377158 | 0     | 1 |
| 4594 | KIF11    | ENST00000260731 | p.P338S            | c.1012      | 0.011808749 | 0     | 1 |

|              |                 |                     |           |             |       |   |
|--------------|-----------------|---------------------|-----------|-------------|-------|---|
| 4594 KIF11   | ENST00000260731 | p.A37T              | c.109     | 0.011808749 | 6.404 | 1 |
| 4595 RXRA    | ENST00000481739 | p.V149A             | c.446     | 1.104024842 | 0     | 2 |
| 4595 RXRA    | ENST00000481739 | p.G199S             | c.595     | 0.208049684 | 3.265 | 1 |
| 4596 TPP1    | ENST00000299427 | p.Q56K              | c.166     | 0.031620413 | 4.983 | 1 |
| 4596 TPP1    | ENST00000299427 | p.PLT93in_frame_del | c.286_278 | 0.031620413 | 0     | 1 |
| 4597 CRKL    | ENST00000354336 | p.A102V             | c.305     | 0.069492447 | 0     | 1 |
| 4597 CRKL    | ENST00000354336 | p.A13P              | c.37      | 0.069492447 | 3.847 | 1 |
| 4598 TNPO1   | ENST00000337273 | p.Y526C             | c.1577    | 0.012182888 | 6.359 | 1 |
| 4598 TNPO1   | ENST00000337273 | p.Y569C             | c.1706    | 0.012182888 | 0     | 1 |
| 4599 IL17F   | ENST00000336123 | p.S80Y              | c.239     | 0.028577034 | 0     | 1 |
| 4599 IL17F   | ENST00000336123 | p.G106C             | c.316     | 0.028577034 | 5.129 | 1 |
| 4600 PTPRG   | ENST00000474889 | p.Q856K             | c.2566    | 0.031928753 | 4.969 | 1 |
| 4600 PTPRG   | ENST00000474889 | p.V1103I            | c.3307    | 0.031928753 | 0     | 1 |
| 4601 VPS4B   | ENST00000238497 | p.E443K             | c.1327    | 0.069927319 | 3.838 | 1 |
| 4601 VPS4B   | ENST00000238497 | p.E293A             | c.878     | 0.069927319 | 0     | 1 |
| 4602 RELA    | ENST00000406246 | p.E127Q             | c.379     | 0.009888723 | 6.66  | 1 |
| 4602 RELA    | ENST00000406246 | p.R149H             | c.446     | 0.009888723 | 0     | 1 |
| 4603 GLMN    | ENST00000370360 | p.P219H             | c.656     | 0.002003864 | 8.963 | 1 |
| 4603 GLMN    | ENST00000370360 | p.D284Y             | c.850     | 0.002003864 | 0     | 1 |
| 4604 USP7    | ENST00000344836 | p.A530V             | c.1589    | 1.007572577 | 0     | 2 |
| 4604 USP7    | ENST00000344836 | p.Q237P             | c.710     | 0.015145153 | 7.045 | 1 |
| 4605 SUGT1   | ENST00000343788 | p.K190E             | c.568     | 0.396392068 | 2.335 | 1 |
| 4605 SUGT1   | ENST00000343788 | p.L225F             | c.673     | 1.198196034 | 0     | 2 |
| 4606 HHIP    | ENST00000296575 | p.P409Q             | c.1226    | 0.008501894 | 0     | 1 |
| 4606 HHIP    | ENST00000296575 | p.Y474C             | c.1421    | 0.008501894 | 6.878 | 1 |
| 4607 UCHL3   | ENST00000377595 | p.M37V              | c.109     | 0.030542801 | 0     | 1 |
| 4607 UCHL3   | ENST00000377595 | p.A205V             | c.614     | 0.008121714 | 6.944 | 1 |
| 4607 UCHL3   | ENST00000377595 | p.A224V             | c.671     | 0.022421086 | 5.479 | 1 |
| 4608 TAS2R39 | ENST00000446620 | p.F136Y             | c.407     | 0.092205716 | 3.439 | 1 |
| 4608 TAS2R39 | ENST00000446620 | p.F224L             | c.670     | 0.092205716 | 0     | 1 |
| 4609 PTPRC   | ENST00000442510 | p.E1070K            | c.3208    | 1.012841878 | 0     | 2 |
| 4609 PTPRC   | ENST00000442510 | p.R1170S            | c.3510    | 0.025683756 | 6.283 | 1 |
| 4610 CLEC9A  | ENST00000355819 | p.W134R             | c.400     | 0.048462075 | 0     | 1 |
| 4610 CLEC9A  | ENST00000355819 | p.T226K             | c.677     | 0.048462075 | 4.367 | 1 |
| 4611 C1S     | ENST00000328916 | p.G440R             | c.1318    | 0.041839227 | 4.579 | 1 |
| 4611 C1S     | ENST00000328916 | p.A585T             | c.1753    | 0.041839227 | 0     | 1 |
| 4612 AGT     | ENST00000366667 | p.A397V             | c.1190    | 0.004512054 | 0     | 1 |
| 4612 AGT     | ENST00000366667 | p.R116C             | c.346     | 0.004512054 | 7.792 | 1 |
| 4613 DUSP16  | ENST00000228862 | p.M5V               | c.13      | 0.031211166 | 0     | 1 |
| 4613 DUSP16  | ENST00000228862 | p.L98V              | c.292     | 0.014967738 | 6.062 | 1 |
| 4613 DUSP16  | ENST00000228862 | p.L104I             | c.310     | 0.016243429 | 5.944 | 1 |
| 4614 KLHL3   | ENST00000309755 | p.G490R             | c.1468    | 0.027223569 | 0     | 1 |
| 4614 KLHL3   | ENST00000309755 | p.D511N             | c.1531    | 0.027223569 | 5.199 | 1 |
| 4615 TNFSF4  | ENST00000281834 | p.E68K              | c.202     | 0.016345077 | 5.935 | 1 |
| 4615 TNFSF4  | ENST00000281834 | p.S134F             | c.401     | 0.005945443 | 7.394 | 1 |
| 4615 TNFSF4  | ENST00000281834 | p.V165L             | c.493     | 0.02229052  | 0     | 1 |
| 4616 FGF12   | ENST00000450716 | p.V95L              | c.283     | 0.189172388 | 3.555 | 1 |
| 4616 FGF12   | ENST00000450716 | p.L113M             | c.337     | 0.105024968 | 3.369 | 1 |
| 4616 FGF12   | ENST00000450716 | p.S134L             | c.401     | 0.190027573 | 0     | 1 |

|               |                 |         |        |             |       |   |
|---------------|-----------------|---------|--------|-------------|-------|---|
| 4616 FGF12    | ENST00000450716 | p.P138L | c.413  | 0.104010728 | 6.938 | 1 |
| 4617 IFI16    | ENST00000295809 | p.I629M | c.1887 | 0.142427678 | 0     | 1 |
| 4617 IFI16    | ENST00000295809 | p.D652N | c.1954 | 0.0842809   | 3.657 | 1 |
| 4617 IFI16    | ENST00000295809 | p.R657Q | c.1970 | 0.068159653 | 3.985 | 1 |
| 4618 PPP1R13L | ENST00000418234 | p.G761R | c.2281 | 0.089622203 | 3.48  | 1 |
| 4618 PPP1R13L | ENST00000418234 | p.T786I | c.2357 | 0.089622203 | 0     | 1 |
| 4619 AGO2     | ENST00000220592 | p.L650I | c.1948 | 0.046166814 | 0     | 1 |
| 4619 AGO2     | ENST00000220592 | p.A690T | c.2068 | 0.046166814 | 4.437 | 1 |
| 4620 RNASE4   | ENST00000304704 | p.R82H  | c.245  | 0.030670596 | 0     | 1 |
| 4620 RNASE4   | ENST00000304704 | p.P25S  | c.73   | 0.030670596 | 5.027 | 1 |
| 4621 PTGES    | ENST00000340607 | p.A45V  | c.134  | 0.065789447 | 0     | 1 |
| 4621 PTGES    | ENST00000340607 | p.R122Q | c.365  | 0.065789447 | 3.926 | 1 |
| 4622 TLR4     | ENST00000355622 | p.D95Y  | c.283  | 0.059870951 | 4.062 | 1 |
| 4622 TLR4     | ENST00000355622 | p.A121D | c.362  | 0.059870951 | 0     | 1 |
| 4623 USP2     | ENST00000260187 | p.S422L | c.1265 | 0.155178436 | 0     | 1 |
| 4623 USP2     | ENST00000260187 | p.K488T | c.1463 | 0.155178436 | 2.688 | 1 |
| 4624 CYP19A1  | ENST00000559878 | p.E335K | c.1003 | 0.03890232  | 0     | 1 |
| 4624 CYP19A1  | ENST00000559878 | p.E357K | c.1069 | 0.03890232  | 4.684 | 1 |
| 4625 GUSB     | ENST00000304895 | p.V96I  | c.286  | 0.018249491 | 5.776 | 1 |
| 4625 GUSB     | ENST00000304895 | p.N173S | c.518  | 0.018249491 | 0     | 1 |
| 4626 ASH2L    | ENST00000343823 | p.F139L | c.415  | 1.087777805 | 0     | 2 |
| 4626 ASH2L    | ENST00000343823 | p.A174V | c.521  | 0.175555609 | 3.51  | 1 |
| 4627 PPFIA2   | ENST00000549396 | p.A929V | c.2786 | 0.004364403 | 7.84  | 1 |
| 4627 PPFIA2   | ENST00000549396 | p.V962A | c.2885 | 0.004364403 | 0     | 1 |
| 4628 CA8      | ENST00000317995 | p.L99F  | c.295  | 0.108640286 | 0     | 1 |
| 4628 CA8      | ENST00000317995 | p.A164T | c.490  | 0.038922997 | 4.784 | 1 |
| 4628 CA8      | ENST00000317995 | p.I166T | c.497  | 0.074968988 | 3.789 | 1 |
| 4629 HTRA3    | ENST00000307358 | p.Q403R | c.1208 | 6.091759415 | 0     | 7 |
| 4629 HTRA3    | ENST00000307358 | p.R438Q | c.1313 | 0.642315903 | 3.446 | 1 |
| 4630 NQO1     | ENST00000320623 | p.R211C | c.631  | 0.007883216 | 6.987 | 1 |
| 4630 NQO1     | ENST00000320623 | p.A29T  | c.85   | 0.007883216 | 0     | 1 |
| 4631 PPP2CA   | ENST00000481195 | p.L170I | c.508  | 0.15442733  | 0     | 1 |
| 4631 PPP2CA   | ENST00000481195 | p.F220S | c.659  | 0.15442733  | 2.695 | 1 |
| 4632 NPM1     | ENST00000517671 | p.V99A  | c.296  | 0.007726335 | 7.016 | 1 |
| 4632 NPM1     | ENST00000517671 | p.K32E  | c.94   | 0.007726335 | 0     | 1 |
| 4633 UPP2     | ENST00000605860 | p.T218M | c.653  | 0.020890633 | 0     | 1 |
| 4633 UPP2     | ENST00000605860 | p.A329V | c.986  | 0.020890633 | 5.581 | 1 |
| 4634 NAALAD2  | ENST00000534061 | p.P540Q | c.1619 | 0.087413505 | 3.516 | 1 |
| 4634 NAALAD2  | ENST00000534061 | p.W236L | c.707  | 0.087413505 | 0     | 1 |
| 4635 LGALS2   | ENST00000215886 | p.F50I  | c.148  | 0.116467554 | 4.102 | 1 |
| 4635 LGALS2   | ENST00000215886 | p.P78T  | c.232  | 1.058233777 | 0     | 1 |
| 4635 LGALS2   | ENST00000215886 | p.P78Q  | c.233  | 1.058233777 | 0     | 1 |
| 4636 CLC      | ENST00000221804 | p.A11T  | c.31   | 0.108894274 | 0     | 1 |
| 4636 CLC      | ENST00000221804 | p.A120S | c.358  | 0.108894274 | 3.199 | 1 |
| 4637 DNAJB1   | ENST00000254322 | p.L172I | c.514  | 0.118036076 | 0     | 1 |
| 4637 DNAJB1   | ENST00000254322 | p.D241G | c.722  | 0.030451586 | 5.144 | 1 |
| 4637 DNAJB1   | ENST00000254322 | p.R249K | c.746  | 0.079902772 | 3.704 | 1 |
| 4637 DNAJB1   | ENST00000254322 | p.G251D | c.752  | 0.014020302 | 6.263 | 1 |
| 4638 CAND1    | ENST00000545606 | p.S124F | c.371  | 0.019572882 | 0     | 1 |

|              |                 |                    |             |             |       |   |
|--------------|-----------------|--------------------|-------------|-------------|-------|---|
| 4638 CAND1   | ENST00000545606 | p.Q165R            | c.494       | 0.019572882 | 5.675 | 1 |
| 4639 KEAP1   | ENST00000171111 | p.G603W            | c.1807      | 0.137288599 | 0     | 1 |
| 4639 KEAP1   | ENST00000171111 | p.G332C            | c.994       | 0.04342074  | 4.66  | 1 |
| 4639 KEAP1   | ENST00000171111 | p.G333S            | c.997       | 0.101599552 | 3.355 | 1 |
| 4640 HDAC8   | ENST00000373573 | p.H334Y            | c.1000      | 0.095533215 | 9.146 | 1 |
| 4640 HDAC8   | ENST00000373573 | p.M40V             | c.118       | 0.147495945 | 5.678 | 1 |
| 4640 HDAC8   | ENST00000373573 | p.T311M            | c.932       | 1.021297366 | 0     | 2 |
| 4641 TLE1    | ENST00000376499 | p.L722in_frame_del | c.2166_2164 | 0.063667991 | 0     | 1 |
| 4641 TLE1    | ENST00000376499 | p.S744N            | c.2231      | 0.022270528 | 6.611 | 1 |
| 4641 TLE1    | ENST00000376499 | p.I754V            | c.2260      | 0.053437636 | 4.226 | 1 |
| 4642 ITGA2B  | ENST00000262407 | p.R551W            | c.1651      | 0.057154068 | 4.129 | 1 |
| 4642 ITGA2B  | ENST00000262407 | p.R590Q            | c.1769      | 0.057154068 | 0     | 1 |
| 4643 PSPH    | ENST00000437355 | p.C18F             | c.53        | 0.009407323 | 6.732 | 1 |
| 4643 PSPH    | ENST00000437355 | p.D183N            | c.547       | 0.009407323 | 0     | 1 |
| 4645 ETV6    | ENST00000396373 | p.R369W            | c.1105      | 4.008166876 | 0     | 2 |
| 4645 ETV6    | ENST00000396373 | p.R369L            | c.1106      | 4.008166876 | 0     | 1 |
| 4645 ETV6    | ENST00000396373 | p.R369Q            | c.1106      | 4.008166876 | 0     | 2 |
| 4645 ETV6    | ENST00000396373 | p.R418G            | c.1252      | 0.040834379 | 6.936 | 1 |
| 4646 PARP16  | ENST00000261888 | p.E104D            | c.312       | 0.041035035 | 4.607 | 1 |
| 4646 PARP16  | ENST00000261888 | p.Y267C            | c.800       | 0.041035035 | 0     | 1 |
| 4647 OBSCN   | ENST00000570156 | p.G3893E           | c.11678     | 0.201072179 | 0     | 1 |
| 4647 OBSCN   | ENST00000570156 | p.G3938V           | c.11813     | 0.126086962 | 3.105 | 1 |
| 4647 OBSCN   | ENST00000570156 | p.A3940V           | c.11819     | 0.094707905 | 3.559 | 1 |
| 4648 CYP2C9  | ENST00000260682 | p.G431E            | c.1292      | 1.053996137 | 0     | 2 |
| 4648 CYP2C9  | ENST00000260682 | p.I88T             | c.263       | 0.107992273 | 4.211 | 1 |
| 4649 UPP2    | ENST00000605860 | p.M160I            | c.480       | 0.008920033 | 7.028 | 1 |
| 4649 UPP2    | ENST00000605860 | p.E184K            | c.550       | 0.171802477 | 0     | 1 |
| 4649 UPP2    | ENST00000605860 | p.Y277F            | c.830       | 0.165397838 | 2.607 | 1 |
| 4650 PROZ    | ENST00000342783 | p.Q192K            | c.574       | 0.06237017  | 0     | 1 |
| 4650 PROZ    | ENST00000342783 | p.R246S            | c.738       | 0.06237017  | 4.003 | 1 |
| 4651 TGM2    | ENST00000361475 | p.P373R            | c.1118      | 0.128514228 | 2.96  | 1 |
| 4651 TGM2    | ENST00000361475 | p.G221C            | c.661       | 0.128514228 | 0     | 1 |
| 4652 PTPN5   | ENST00000358540 | p.G445E            | c.1334      | 0.076680311 | 0     | 1 |
| 4652 PTPN5   | ENST00000358540 | p.Q530K            | c.1588      | 0.076680311 | 3.705 | 1 |
| 4653 MTERFD2 | ENST00000391980 | p.V115G            | c.344       | 0.061260193 | 0     | 1 |
| 4653 MTERFD2 | ENST00000391980 | p.C142S            | c.424       | 0.013630667 | 6.197 | 1 |
| 4653 MTERFD2 | ENST00000391980 | p.K146N            | c.438       | 0.047629526 | 4.392 | 1 |
| 4654 TAS2R39 | ENST00000446620 | p.E93K             | c.277       | 0.059375024 | 0     | 1 |
| 4654 TAS2R39 | ENST00000446620 | p.S116G            | c.346       | 0.059375024 | 4.074 | 1 |
| 4655 PADI4   | ENST00000375448 | p.I336V            | c.1006      | 0.138408073 | 0     | 1 |
| 4655 PADI4   | ENST00000375448 | p.A310T            | c.928       | 0.138408073 | 2.853 | 1 |
| 4656 CEACAM5 | ENST00000221992 | p.T41R             | c.122       | 0.020992241 | 6.574 | 1 |
| 4656 CEACAM5 | ENST00000221992 | p.S106F            | c.317       | 1.010496121 | 0     | 2 |
| 4657 NF1     | ENST00000358273 | p.K1568R           | c.4703      | 0.01594226  | 0     | 1 |
| 4657 NF1     | ENST00000358273 | p.G1668V           | c.5003      | 0.01594226  | 5.971 | 1 |
| 4658 NUP98   | ENST00000324932 | p.S709C            | c.2126      | 0.005027302 | 0     | 1 |
| 4658 NUP98   | ENST00000324932 | p.I758M            | c.2274      | 0.005027302 | 7.636 | 1 |
| 4659 HSPBP1  | ENST00000255631 | p.R282Q            | c.845       | 0.009618316 | 6.7   | 1 |
| 4659 HSPBP1  | ENST00000255631 | p.Q330L            | c.989       | 0.009618316 | 0     | 1 |



|               |                 |                          |             |             |       |   |
|---------------|-----------------|--------------------------|-------------|-------------|-------|---|
| 4660 PPT2     | ENST00000395523 | p.S136F                  | c.407       | 0.064480199 | 3.955 | 1 |
| 4660 PPT2     | ENST00000395523 | p.H283N                  | c.846_847   | 0.064480199 | 0     | 1 |
| 4661 VAV1     | ENST00000602142 | p.E234Q                  | c.700       | 1.007850499 | 0     | 1 |
| 4661 VAV1     | ENST00000602142 | p.E234D                  | c.702       | 1.007850499 | 0     | 1 |
| 4661 VAV1     | ENST00000602142 | p.H293Q                  | c.879       | 0.015700997 | 6.993 | 1 |
| 4662 MAP2K7   | ENST00000545011 | p.L350M                  | c.1048      | 0.016933218 | 0     | 1 |
| 4662 MAP2K7   | ENST00000545011 | p.L403F                  | c.1207      | 0.016933218 | 5.884 | 1 |
| 4663 C3       | ENST00000245907 | p.E586D                  | c.1758      | 0.075050214 | 0     | 1 |
| 4663 C3       | ENST00000245907 | p.I786N                  | c.2357      | 0.075050214 | 3.736 | 1 |
| 4664 CHAT     | ENST00000337653 | p.D446N                  | c.1336      | 0.20546129  | 2.79  | 1 |
| 4664 CHAT     | ENST00000337653 | p.R566S                  | c.1696      | 0.240308398 | 0     | 1 |
| 4664 CHAT     | ENST00000337653 | p.W198G                  | c.592       | 0.156597642 | 3.385 | 1 |
| 4665 CAND1    | ENST00000545606 | p.I435V                  | c.1303      | 0.006057759 | 0     | 1 |
| 4665 CAND1    | ENST00000545606 | p.H472Y                  | c.1414      | 0.006057759 | 7.367 | 1 |
| 4666 ATXN3    | ENST00000545170 | p.G127E                  | c.380       | 0.302079461 | 1.727 | 1 |
| 4666 ATXN3    | ENST00000545170 | p.D175N                  | c.523       | 0.302079461 | 0     | 1 |
| 4667 STAMBPL1 | ENST00000371924 | p.V432L                  | c.1294      | 0.013120805 | 0     | 1 |
| 4667 STAMBPL1 | ENST00000371924 | p.D274V                  | c.821       | 0.013120805 | 6.252 | 1 |
| 4668 FARS2    | ENST00000324331 | p.T387I                  | c.1160      | 0.044163551 | 0     | 1 |
| 4668 FARS2    | ENST00000324331 | p.T67A                   | c.199       | 0.044163551 | 4.501 | 1 |
| 4669 CPA4     | ENST00000222482 | p.L420F                  | c.1258      | 0.014417851 | 0     | 1 |
| 4669 CPA4     | ENST00000222482 | p.A173T                  | c.517       | 0.014417851 | 6.116 | 1 |
| 4670 PPP3CA   | ENST00000394854 | p.NERMPPR480in_frame_del | c.1459_1439 | 0.032940357 | 4.924 | 1 |
| 4670 PPP3CA   | ENST00000394854 | p.H151Y                  | c.451       | 0.032940357 | 0     | 1 |
| 4671 EML1     | ENST00000334192 | p.S710F                  | c.2129      | 0.008048859 | 0     | 1 |
| 4671 EML1     | ENST00000334192 | p.G758E                  | c.2273      | 0.008048859 | 6.957 | 1 |
| 4672 DUSP11   | ENST00000272444 | p.E133G                  | c.398       | 0.267757706 | 1.901 | 1 |
| 4672 DUSP11   | ENST00000272444 | p.L194R                  | c.581       | 0.267757706 | 0     | 1 |
| 4673 VAV1     | ENST00000602142 | p.S413P                  | c.1237      | 0.070560275 | 3.825 | 1 |
| 4673 VAV1     | ENST00000602142 | p.R455W                  | c.1363      | 0.010401966 | 6.587 | 1 |
| 4673 VAV1     | ENST00000602142 | p.Y482H                  | c.1444      | 0.080962241 | 0     | 1 |
| 4674 USP2     | ENST00000260187 | p.E372G                  | c.1115      | 0.072846325 | 3.779 | 1 |
| 4674 USP2     | ENST00000260187 | p.D303A                  | c.909_908   | 0.072846325 | 0     | 1 |
| 4675 POLI     | ENST00000579534 | p.A682T                  | c.2044      | 0.027073027 | 0     | 1 |
| 4675 POLI     | ENST00000579534 | p.Y714D                  | c.2140      | 0.027073027 | 5.207 | 1 |
| 4676 BACE2    | ENST00000330333 | p.V147M                  | c.439       | 0.012877533 | 0     | 1 |
| 4676 BACE2    | ENST00000330333 | p.P207L                  | c.620       | 0.012877533 | 6.279 | 1 |
| 4677 MMP20    | ENST00000260228 | p.F221L                  | c.661       | 0.186468003 | 2.423 | 1 |
| 4677 MMP20    | ENST00000260228 | p.P253L                  | c.758       | 0.186468003 | 0     | 1 |
| 4678 CCNH     | ENST00000256897 | p.F110S                  | c.329       | 0.071694189 | 3.802 | 1 |
| 4678 CCNH     | ENST00000256897 | p.I143M                  | c.429       | 0.071694189 | 0     | 1 |
| 4679 SERPINA7 | ENST00000327674 | p.F82Y                   | c.245       | 0.221123921 | 3.452 | 1 |
| 4679 SERPINA7 | ENST00000327674 | p.D149N                  | c.445       | 1.094884489 | 0     | 2 |
| 4679 SERPINA7 | ENST00000327674 | p.L153F                  | c.457       | 0.045378537 | 8.156 | 1 |
| 4680 KIF3C    | ENST00000264712 | p.V371A                  | c.1112      | 0.083620472 | 0     | 1 |
| 4680 KIF3C    | ENST00000264712 | p.Q87L                   | c.260       | 0.083620472 | 3.58  | 1 |
| 4681 DHODH    | ENST00000219240 | p.T62N                   | c.185       | 0.073452357 | 8.232 | 1 |
| 4681 DHODH    | ENST00000219240 | p.R69W                   | c.205       | 1.053115997 | 0     | 1 |
| 4681 DHODH    | ENST00000219240 | p.R69Q                   | c.206       | 1.053115997 | 0     | 1 |

|              |                 |           |          |             |       |   |
|--------------|-----------------|-----------|----------|-------------|-------|---|
| 4681 DHODH   | ENST00000219240 | p.D105Y   | c.313    | 0.166380386 | 4.328 | 1 |
| 4682 HS3ST5  | ENST00000312719 | p.P346R   | c.1037   | 0.335410556 | 3.576 | 1 |
| 4682 HS3ST5  | ENST00000312719 | p.R325C   | c.973    | 3.083852639 | 0     | 3 |
| 4682 HS3ST5  | ENST00000312719 | p.R325H   | c.974    | 3.083852639 | 0     | 1 |
| 4683 ZG16B   | ENST00000382280 | p.E73K    | c.217    | 0.10041175  | 3.316 | 1 |
| 4683 ZG16B   | ENST00000382280 | p.P186L   | c.557    | 0.10041175  | 0     | 1 |
| 4684 PTPRE   | ENST00000419012 | p.Q500R   | c.1499   | 0.069108166 | 3.855 | 1 |
| 4684 PTPRE   | ENST00000419012 | p.A632T   | c.1894   | 0.069108166 | 0     | 1 |
| 4685 PC      | ENST00000393958 | p.D613G   | c.1838   | 0.024843289 | 5.331 | 1 |
| 4685 PC      | ENST00000393958 | p.R644W   | c.1930   | 0.024843289 | 0     | 1 |
| 4686 PKP2    | ENST00000070846 | p.I533V   | c.1597   | 0.117196387 | 3.093 | 1 |
| 4686 PKP2    | ENST00000070846 | p.A570T   | c.1708   | 0.117196387 | 0     | 1 |
| 4687 LILRB4  | ENST00000434286 | p.L143Q   | c.428    | 0.081390262 | 3.619 | 1 |
| 4687 LILRB4  | ENST00000434286 | p.A178T   | c.532    | 0.081390262 | 0     | 1 |
| 4688 VPS33A  | ENST00000267199 | p.L144F   | c.430    | 0.02919773  | 5.098 | 1 |
| 4688 VPS33A  | ENST00000267199 | p.A175T   | c.523    | 0.039818263 | 0     | 1 |
| 4688 VPS33A  | ENST00000267199 | p.M205I   | c.615    | 0.010620533 | 6.557 | 1 |
| 4689 PRPSAP2 | ENST00000268835 | p.I108M   | c.324    | 0.10896978  | 0     | 1 |
| 4689 PRPSAP2 | ENST00000268835 | p.T144S   | c.431    | 0.10896978  | 3.198 | 1 |
| 4690 TGM3    | ENST00000381458 | p.R608W   | c.1822   | 1.013193764 | 0     | 1 |
| 4690 TGM3    | ENST00000381458 | p.R608Q   | c.1823   | 1.013193764 | 0     | 1 |
| 4690 TGM3    | ENST00000381458 | p.A692T   | c.2074   | 0.026387528 | 6.244 | 1 |
| 4691 PIK3C3  | ENST00000262039 | p.K335N   | c.1005   | 0.069327135 | 3.949 | 1 |
| 4691 PIK3C3  | ENST00000262039 | p.C336F   | c.1007   | 0.033960238 | 7.059 | 1 |
| 4691 PIK3C3  | ENST00000262039 | p.H370R   | c.1109   | 0.07224837  | 0     | 1 |
| 4692 CSNK2A2 | ENST00000262506 | p.F233L   | c.699    | 0.064257114 | 3.96  | 1 |
| 4692 CSNK2A2 | ENST00000262506 | p.F285V   | c.853    | 0.064257114 | 0     | 1 |
| 4693 ITGAX   | ENST00000562522 | p.F240L   | c.718    | 0.079219533 | 3.658 | 1 |
| 4693 ITGAX   | ENST00000562522 | p.I281T   | c.842    | 0.079219533 | 0     | 1 |
| 4694 DCTN1   | ENST00000361874 | p.R90C    | c.268    | 0.100323262 | 3.398 | 1 |
| 4694 DCTN1   | ENST00000361874 | p.Q95H    | c.285    | 0.063011165 | 4.119 | 1 |
| 4694 DCTN1   | ENST00000361874 | p.R32C    | c.94     | 0.152415309 | 0     | 1 |
| 4695 SULT1C2 | ENST00000437390 | p.E36K    | c.106    | 0.070854338 | 0     | 1 |
| 4695 SULT1C2 | ENST00000437390 | p.S132Y   | c.395    | 0.070854338 | 3.819 | 1 |
| 4696 FGD3    | ENST00000375482 | p.W620R   | c.1858   | 0.199022025 | 0     | 1 |
| 4696 FGD3    | ENST00000375482 | p.D667Y   | c.1999   | 0.199022025 | 2.329 | 1 |
| 4697 KIF18A  | ENST00000263181 | p.R168C   | c.502    | 1.004896613 | 0     | 2 |
| 4697 KIF18A  | ENST00000263181 | p.A230D   | c.689    | 0.009793227 | 7.674 | 1 |
| 4698 PPM1K   | ENST00000608933 | p.I300S   | c.899    | 0.080269738 | 3.639 | 1 |
| 4698 PPM1K   | ENST00000608933 | p.V326L   | c.976    | 0.080269738 | 0     | 1 |
| 4699 ALKBH5  | ENST00000399138 | p.P157Q   | c.470    | 0.072997962 | 3.776 | 1 |
| 4699 ALKBH5  | ENST00000399138 | p.R291W   | c.871    | 0.072997962 | 0     | 1 |
| 4700 RBBP7   | ENST00000380084 | p.H219Y   | c.655    | 1.010416396 | 0     | 2 |
| 4700 RBBP7   | ENST00000380084 | p.H243D   | c.727    | 0.020832792 | 6.585 | 1 |
| 4701 SNX11   | ENST00000393405 | p.R57W    | c.169    | 0.204475515 | 3.29  | 1 |
| 4701 SNX11   | ENST00000393405 | p.R25Q    | c.74     | 1.102237757 | 0     | 2 |
| 4702 TTN     | ENST00000589042 | p.R33703Q | c.101108 | 0.103995939 | 3.348 | 1 |
| 4702 TTN     | ENST00000589042 | p.Y33758C | c.101273 | 0.064710908 | 4.085 | 1 |
| 4702 TTN     | ENST00000589042 | p.T33782A | c.101344 | 0.157133098 | 0     | 1 |

|              |                 |           |             |             |       |   |
|--------------|-----------------|-----------|-------------|-------------|-------|---|
| 4703 SYT4    | ENST00000255224 | p.P192T   | c.574       | 0.126569351 | 2.982 | 1 |
| 4703 SYT4    | ENST00000255224 | p.I254N   | c.761       | 0.126569351 | 0     | 1 |
| 4704 CBX1    | ENST00000393408 | p.E120K   | c.358       | 0.022343515 | 0     | 1 |
| 4704 CBX1    | ENST00000393408 | p.S141F   | c.422       | 0.022343515 | 5.484 | 1 |
| 4705 APPL2   | ENST00000551662 | p.D147A   | c.440       | 0.015843517 | 7.179 | 1 |
| 4705 APPL2   | ENST00000551662 | p.R177G   | c.529       | 1.006900899 | 0     | 1 |
| 4705 APPL2   | ENST00000551662 | p.R177Q   | c.530       | 1.006900899 | 0     | 1 |
| 4706 CSK     | ENST00000309470 | p.Y129C   | c.386       | 0.030353359 | 5.042 | 1 |
| 4706 CSK     | ENST00000309470 | p.G162E   | c.485       | 0.030353359 | 0     | 1 |
| 4707 GSTP1   | ENST00000398606 | p.H163Y   | c.487       | 0.009999003 | 6.644 | 1 |
| 4707 GSTP1   | ENST00000398606 | p.N201D   | c.601       | 0.009999003 | 0     | 1 |
| 4708 ASH2L   | ENST00000343823 | p.S192F   | c.575       | 0.1273614   | 2.973 | 1 |
| 4708 ASH2L   | ENST00000343823 | p.D250Y   | c.748       | 0.1273614   | 0     | 1 |
| 4709 A2M     | ENST00000318602 | p.K456R   | c.1367      | 0.04410237  | 4.503 | 1 |
| 4709 A2M     | ENST00000318602 | p.I481N   | c.1442      | 0.04410237  | 0     | 1 |
| 4710 FGF1    | ENST00000359370 | p.D51N    | c.151       | 0.05101269  | 4.293 | 1 |
| 4710 FGF1    | ENST00000359370 | p.V152F   | c.454       | 0.05101269  | 0     | 1 |
| 4711 ADPRH   | ENST00000478399 | p.R134W   | c.400       | 0.036407585 | 4.967 | 1 |
| 4711 ADPRH   | ENST00000478399 | p.R160Q   | c.479       | 0.17066923  | 0     | 1 |
| 4711 ADPRH   | ENST00000478399 | p.S209A   | c.625       | 0.143130723 | 2.85  | 1 |
| 4712 ABL2    | ENST00000502732 | p.K403N   | c.1209      | 0.074480161 | 0     | 1 |
| 4712 ABL2    | ENST00000502732 | p.V425M   | c.1273      | 0.074480161 | 3.747 | 1 |
| 4713 CYP19A1 | ENST00000559878 | p.E483G   | c.1448      | 0.143388378 | 2.802 | 1 |
| 4713 CYP19A1 | ENST00000559878 | p.R192C   | c.574       | 0.143388378 | 0     | 1 |
| 4714 DDC     | ENST00000444124 | p.V382A   | c.1145      | 0.016042024 | 5.962 | 1 |
| 4714 DDC     | ENST00000444124 | p.V404I   | c.1210      | 0.016042024 | 0     | 1 |
| 4715 VCL     | ENST00000211998 | p.R669G   | c.2005      | 0.051438772 | 4.281 | 1 |
| 4715 VCL     | ENST00000211998 | p.N231S   | c.692       | 0.051438772 | 0     | 1 |
| 4716 BARD1   | ENST00000260947 | p.G574D   | c.1721      | 0.022813    | 0     | 1 |
| 4716 BARD1   | ENST00000260947 | p.H606D   | c.1816      | 0.022813    | 5.454 | 1 |
| 4717 P2RY13  | ENST00000325602 | p.S102C   | c.305       | 0.135184345 | 3.887 | 1 |
| 4717 P2RY13  | ENST00000325602 | p.D288N   | c.862       | 1.067592173 | 0     | 1 |
| 4717 P2RY13  | ENST00000325602 | p.D288G   | c.863       | 1.067592173 | 0     | 1 |
| 4718 CNOT1   | ENST00000317147 | p.H1442Y  | c.4324      | 0.05848038  | 4.141 | 1 |
| 4718 CNOT1   | ENST00000317147 | p.R1446H  | c.4337      | 0.033551927 | 4.977 | 1 |
| 4718 CNOT1   | ENST00000317147 | p.P1517F  | c.4550_4549 | 0.088432838 | 0     | 1 |
| 4719 AK2     | ENST00000373449 | p.H145L   | c.434       | 0.215685336 | 0     | 1 |
| 4719 AK2     | ENST00000373449 | p.E170K   | c.508       | 0.215685336 | 2.213 | 1 |
| 4720 B3GAT2  | ENST00000230053 | p.V222A   | c.665       | 0.011932168 | 0     | 1 |
| 4720 B3GAT2  | ENST00000230053 | p.T294N   | c.881       | 0.011932168 | 6.389 | 1 |
| 4721 NOS2    | ENST00000313735 | p.A348V   | c.1043      | 0.030500993 | 0     | 1 |
| 4721 NOS2    | ENST00000313735 | p.T432I   | c.1295      | 0.030500993 | 5.035 | 1 |
| 4722 HMGCS2  | ENST00000369406 | p.G232E   | c.695       | 0.011932168 | 6.389 | 1 |
| 4722 HMGCS2  | ENST00000369406 | p.R274H   | c.821       | 0.011932168 | 0     | 1 |
| 4723 OTC     | ENST0000039007  | p.A128V   | c.383       | 0.032084048 | 0     | 1 |
| 4723 OTC     | ENST0000039007  | p.S156Y   | c.467       | 0.032084048 | 4.962 | 1 |
| 4724 TTN     | ENST00000589042 | p.V24628I | c.73882     | 0.129138806 | 0     | 1 |
| 4724 TTN     | ENST00000589042 | p.A24709T | c.74125     | 0.058360059 | 4.203 | 1 |
| 4724 TTN     | ENST00000589042 | p.K24710N | c.74130     | 0.078906092 | 3.74  | 1 |

|              |                 |          |           |             |       |   |
|--------------|-----------------|----------|-----------|-------------|-------|---|
| 4725 FGF13   | ENST00000370603 | p.R120L  | c.359     | 0.007976657 | 6.97  | 1 |
| 4725 FGF13   | ENST00000370603 | p.T164A  | c.490     | 0.044323304 | 0     | 1 |
| 4725 FGF13   | ENST00000370603 | p.A201V  | c.602     | 0.006782346 | 7.204 | 1 |
| 4725 FGF13   | ENST00000370603 | p.F204V  | c.610     | 0.029564301 | 5.08  | 1 |
| 4726 GZMB    | ENST00000382542 | p.N138K  | c.414     | 0.030841142 | 0     | 1 |
| 4726 GZMB    | ENST00000382542 | p.T218S  | c.653     | 0.030841142 | 5.019 | 1 |
| 4727 TEAD2   | ENST00000598810 | p.Q357H  | c.1071    | 0.016775506 | 0     | 1 |
| 4727 TEAD2   | ENST00000598810 | p.K393T  | c.1178    | 0.00839066  | 6.897 | 1 |
| 4727 TEAD2   | ENST00000598810 | p.G287S  | c.859     | 0.008384846 | 6.898 | 1 |
| 4728 FGFR4   | ENST00000502906 | p.C56Y   | c.167     | 0.04591152  | 5.445 | 1 |
| 4728 FGFR4   | ENST00000502906 | p.R85C   | c.253     | 1.02295576  | 0     | 2 |
| 4729 MUTYH   | ENST00000450313 | p.R116W  | c.346     | 1.032509383 | 0     | 2 |
| 4729 MUTYH   | ENST00000450313 | p.R274Q  | c.821     | 0.065018767 | 4.943 | 1 |
| 4730 CYP46A1 | ENST00000261835 | p.R251L  | c.752     | 0.040740537 | 4.846 | 1 |
| 4730 CYP46A1 | ENST00000261835 | p.R262W  | c.784     | 0.17767475  | 2.542 | 1 |
| 4730 CYP46A1 | ENST00000261835 | p.D289N  | c.865     | 0.206474845 | 0     | 1 |
| 4731 ATG4A   | ENST00000372232 | p.Q83E   | c.247     | 0.00537321  | 7.54  | 1 |
| 4731 ATG4A   | ENST00000372232 | p.I114L  | c.340     | 0.00537321  | 0     | 1 |
| 4732 OPN1SW  | ENST00000249389 | p.G171C  | c.511     | 0.053846635 | 5.215 | 1 |
| 4732 OPN1SW  | ENST00000249389 | p.R196S  | c.586     | 1.026923317 | 0     | 1 |
| 4732 OPN1SW  | ENST00000249389 | p.R196H  | c.587     | 1.026923317 | 0     | 1 |
| 4733 RET     | ENST00000355710 | p.G823E  | c.2468    | 0.092333629 | 0     | 1 |
| 4733 RET     | ENST00000355710 | p.R844Q  | c.2531    | 0.092333629 | 3.437 | 1 |
| 4734 MET     | ENST00000318493 | p.V1110I | c.3328    | 0.017062821 | 5.873 | 1 |
| 4734 MET     | ENST00000318493 | p.D1246H | c.3736    | 0.017062821 | 0     | 1 |
| 4735 CTPS1   | ENST00000372616 | p.T150I  | c.449_450 | 0.008765183 | 0     | 1 |
| 4735 CTPS1   | ENST00000372616 | p.V180I  | c.538     | 0.008765183 | 6.834 | 1 |
| 4736 HAT1    | ENST00000264108 | p.I114S  | c.341     | 0.073812041 | 3.76  | 1 |
| 4736 HAT1    | ENST00000264108 | p.W184R  | c.550     | 0.073812041 | 0     | 1 |
| 4737 KDR     | ENST00000263923 | p.E240D  | c.720     | 0.111469261 | 3.309 | 1 |
| 4737 KDR     | ENST00000263923 | p.H269Y  | c.805     | 0.115317519 | 3.255 | 1 |
| 4737 KDR     | ENST00000263923 | p.G296D  | c.887     | 0.205648526 | 0     | 1 |
| 4738 CRYGB   | ENST00000260988 | p.M91I   | c.273     | 0.097058609 | 0     | 1 |
| 4738 CRYGB   | ENST00000260988 | p.V127M  | c.379     | 0.097058609 | 3.365 | 1 |
| 4739 FARP1   | ENST00000376586 | p.E844K  | c.2530    | 0.021270533 | 5.555 | 1 |
| 4739 FARP1   | ENST00000376586 | p.Q883R  | c.2648    | 0.021270533 | 0     | 1 |
| 4740 PDGFA   | ENST00000354513 | p.R128C  | c.382     | 0.001786065 | 0     | 1 |
| 4740 PDGFA   | ENST00000354513 | p.A178T  | c.532     | 0.001786065 | 9.129 | 1 |
| 4741 C8A     | ENST00000361249 | p.N482K  | c.1446    | 0.28048587  | 2.834 | 1 |
| 4741 C8A     | ENST00000361249 | p.D323N  | c.967     | 1.140242935 | 0     | 2 |
| 4742 TRIP10  | ENST00000313244 | p.R400Q  | c.1199    | 0.018274807 | 0     | 1 |
| 4742 TRIP10  | ENST00000313244 | p.L476F  | c.1426    | 0.018274807 | 5.774 | 1 |
| 4743 CPN1    | ENST00000370418 | p.E41K   | c.121     | 1.028935813 | 0     | 1 |
| 4743 CPN1    | ENST00000370418 | p.E41Q   | c.121     | 1.028935813 | 0     | 1 |
| 4743 CPN1    | ENST00000370418 | p.E101K  | c.301     | 0.057871626 | 5.111 | 1 |
| 4744 SDK2    | ENST00000392650 | p.D522N  | c.1564    | 0.213750544 | 0     | 1 |
| 4744 SDK2    | ENST00000392650 | p.G552S  | c.1654    | 0.213750544 | 2.226 | 1 |
| 4745 TUSC3   | ENST00000503731 | p.R63C   | c.187     | 0.446273486 | 3.164 | 1 |
| 4745 TUSC3   | ENST00000503731 | p.R117C  | c.349     | 3.111568371 | 0     | 2 |

|               |                 |          |           |             |       |   |
|---------------|-----------------|----------|-----------|-------------|-------|---|
| 4745 TUSC3    | ENST00000503731 | p.R117H  | c.350     | 3.111568371 | 0     | 2 |
| 4746 MPDZ     | ENST00000546205 | p.I395T  | c.1184    | 0.048294409 | 0     | 1 |
| 4746 MPDZ     | ENST00000546205 | p.N441D  | c.1321    | 0.048294409 | 4.372 | 1 |
| 4747 DPYS     | ENST00000351513 | p.G216C  | c.646     | 1.013331658 | 0     | 1 |
| 4747 DPYS     | ENST00000351513 | p.G216S  | c.646     | 1.013331658 | 0     | 1 |
| 4747 DPYS     | ENST00000351513 | p.W285C  | c.855     | 0.026663316 | 6.229 | 1 |
| 4748 DYRK2    | ENST00000344096 | p.P506L  | c.1517    | 0.017015578 | 0     | 1 |
| 4748 DYRK2    | ENST00000344096 | p.H532Y  | c.1594    | 0.017015578 | 5.877 | 1 |
| 4749 PTPN4    | ENST00000263708 | p.Q565H  | c.1695    | 0.027969533 | 5.16  | 1 |
| 4749 PTPN4    | ENST00000263708 | p.N604Y  | c.1810    | 0.027969533 | 0     | 1 |
| 4750 PHYH     | ENST00000263038 | p.R201W  | c.601     | 1.041148966 | 0     | 1 |
| 4750 PHYH     | ENST00000263038 | p.R201Q  | c.602     | 1.041148966 | 0     | 1 |
| 4750 PHYH     | ENST00000263038 | p.H247Q  | c.741     | 0.082297933 | 4.603 | 1 |
| 4751 MAP2K2   | ENST00000262948 | p.G83S   | c.247     | 0.024929539 | 5.326 | 1 |
| 4751 MAP2K2   | ENST00000262948 | p.H104R  | c.311     | 0.024929539 | 0     | 1 |
| 4752 PPP1CC   | ENST00000340766 | p.L38M   | c.112     | 0.011899131 | 0     | 1 |
| 4752 PPP1CC   | ENST00000340766 | p.F152C  | c.455     | 0.011899131 | 6.393 | 1 |
| 4753 KIT      | ENST00000288135 | p.F772V  | c.2314    | 0.190386092 | 0     | 1 |
| 4753 KIT      | ENST00000288135 | p.R804W  | c.2410    | 0.190386092 | 2.393 | 1 |
| 4754 RAB9A    | ENST00000464506 | p.V51M   | c.151     | 0.207905525 | 3.266 | 1 |
| 4754 RAB9A    | ENST00000464506 | p.R170Q  | c.509     | 1.103952762 | 0     | 2 |
| 4755 ASPA     | ENST00000263080 | p.Q138H  | c.414     | 0.056445407 | 0     | 1 |
| 4755 ASPA     | ENST00000263080 | p.P217S  | c.649     | 0.056445407 | 4.147 | 1 |
| 4756 CANT1    | ENST00000591773 | p.G343R  | c.1027    | 1.07557223  | 0     | 1 |
| 4756 CANT1    | ENST00000591773 | p.G343D  | c.1028    | 1.07557223  | 0     | 1 |
| 4756 CANT1    | ENST00000591773 | p.R301C  | c.901     | 0.151144459 | 3.726 | 1 |
| 4757 CYTH1    | ENST00000361101 | p.V188I  | c.562     | 0.016232173 | 5.945 | 1 |
| 4757 CYTH1    | ENST00000361101 | p.F214L  | c.642     | 0.016232173 | 0     | 1 |
| 4759 XDH      | ENST00000379416 | p.R104K  | c.311     | 0.080440494 | 7.246 | 1 |
| 4759 XDH      | ENST00000379416 | p.E138K  | c.412     | 1.104524891 | 0     | 1 |
| 4759 XDH      | ENST00000379416 | p.E138D  | c.414     | 1.104524891 | 0     | 1 |
| 4759 XDH      | ENST00000379416 | p.G159C  | c.475     | 0.263139305 | 3.352 | 1 |
| 4760 TLR3     | ENST00000296795 | p.S236N  | c.707     | 0.009698652 | 0     | 1 |
| 4760 TLR3     | ENST00000296795 | p.T262A  | c.784     | 0.009698652 | 6.688 | 1 |
| 4761 MMAB     | ENST00000545712 | p.G87E   | c.260     | 0.01903766  | 5.715 | 1 |
| 4761 MMAB     | ENST00000545712 | p.E91K   | c.271     | 0.006881792 | 7.183 | 1 |
| 4761 MMAB     | ENST00000545712 | p.R190H  | c.569     | 0.025919452 | 0     | 1 |
| 4762 DYSF     | ENST00000410020 | p.R977Q  | c.2930    | 0.024348893 | 6.36  | 1 |
| 4762 DYSF     | ENST00000410020 | p.R1056Q | c.3167    | 1.012174447 | 0     | 2 |
| 4763 DDX39B   | ENST00000417556 | p.V357A  | c.1070    | 0.031120305 | 5.006 | 1 |
| 4763 DDX39B   | ENST00000417556 | p.H333Y  | c.997     | 0.031120305 | 0     | 1 |
| 4764 LILRB2   | ENST00000391749 | p.P410L  | c.1229    | 0.07732078  | 3.693 | 1 |
| 4764 LILRB2   | ENST00000391749 | p.S43C   | c.127     | 0.07732078  | 0     | 1 |
| 4765 HIST1H1B | ENST00000331442 | p.P121A  | c.361     | 0.021138254 | 5.564 | 1 |
| 4765 HIST1H1B | ENST00000331442 | p.T187A  | c.559     | 0.021138254 | 0     | 1 |
| 4766 SERPINA5 | ENST00000554866 | p.L400F  | c.1198    | 0.016581985 | 6.786 | 1 |
| 4766 SERPINA5 | ENST00000554866 | p.R54I   | c.161_162 | 0.02254205  | 0     | 1 |
| 4766 SERPINA5 | ENST00000554866 | p.Q276K  | c.826     | 0.013480334 | 6.213 | 1 |
| 4767 PLEC     | ENST00000322810 | p.D677N  | c.2029    | 0.030143693 | 6.052 | 1 |

|              |                 |                          |             |             |       |   |
|--------------|-----------------|--------------------------|-------------|-------------|-------|---|
| 4767 PLEC    | ENST00000322810 | p.R748C                  | c.2242      | 1.015071847 | 0     | 2 |
| 4768 TLR5    | ENST00000366881 | p.L438I                  | c.1312      | 0.014477938 | 6.11  | 1 |
| 4768 TLR5    | ENST00000366881 | p.F460L                  | c.1380      | 0.01975884  | 0     | 1 |
| 4768 TLR5    | ENST00000366881 | p.L507M                  | c.1519      | 0.005280902 | 7.565 | 1 |
| 4769 UBE2D2  | ENST00000398733 | p.P61S                   | c.181       | 0.031401994 | 4.993 | 1 |
| 4769 UBE2D2  | ENST00000398733 | p.E9Q                    | c.25        | 0.031401994 | 0     | 1 |
| 4770 PRDM12  | ENST00000253008 | p.T112N                  | c.335       | 0.107469561 | 3.218 | 1 |
| 4770 PRDM12  | ENST00000253008 | p.K187N                  | c.561       | 0.107469561 | 0     | 1 |
| 4771 SUV39H2 | ENST00000354919 | p.R353Q                  | c.1058      | 0.021196943 | 0     | 1 |
| 4771 SUV39H2 | ENST00000354919 | p.Y280S                  | c.839       | 0.021196943 | 5.56  | 1 |
| 4772 SAE1    | ENST00000270225 | p.H172R                  | c.515       | 0.104096971 | 0     | 1 |
| 4772 SAE1    | ENST00000270225 | p.K210N                  | c.630       | 0.104096971 | 3.264 | 1 |
| 4773 DICER1  | ENST00000343455 | p.F854L                  | c.2562      | 0.064433552 | 3.956 | 1 |
| 4773 DICER1  | ENST00000343455 | p.CLPSIL1053in_frame_del | c.3175_3158 | 0.064433552 | 0     | 1 |
| 4774 CUL3    | ENST00000264414 | p.N49D                   | c.145       | 0.011686607 | 0     | 1 |
| 4774 CUL3    | ENST00000264414 | p.A115T                  | c.343       | 0.011686607 | 6.419 | 1 |
| 4776 PRKCI   | ENST00000295797 | p.E559Q                  | c.1675      | 0.066661611 | 0     | 1 |
| 4776 PRKCI   | ENST00000295797 | p.K267N                  | c.801       | 0.066661611 | 3.907 | 1 |
| 4777 HCN4    | ENST00000261917 | p.K645N                  | c.1935      | 0.01594226  | 5.971 | 1 |
| 4777 HCN4    | ENST00000261917 | p.R669H                  | c.2006      | 0.01594226  | 0     | 1 |
| 4778 RPL4    | ENST00000307961 | p.E13K                   | c.37        | 0.001588631 | 0     | 1 |
| 4778 RPL4    | ENST00000307961 | p.E254K                  | c.760       | 0.001588631 | 9.298 | 1 |
| 4779 EIF4A3  | ENST00000269349 | p.F265C                  | c.794       | 0.097058609 | 3.365 | 1 |
| 4779 EIF4A3  | ENST00000269349 | p.M297I                  | c.891       | 0.097058609 | 0     | 1 |
| 4780 PYGM    | ENST00000164139 | p.H583L                  | c.1748      | 0.013084476 | 0     | 1 |
| 4780 PYGM    | ENST00000164139 | p.V742A                  | c.2225      | 0.013084476 | 6.256 | 1 |
| 4781 CNNM2   | ENST00000369878 | p.R454W                  | c.1360      | 0.082927821 | 0     | 1 |
| 4781 CNNM2   | ENST00000369878 | p.R488H                  | c.1463      | 0.082927821 | 3.592 | 1 |
| 4782 CDON    | ENST00000392693 | p.T857I                  | c.2570      | 0.029523345 | 0     | 1 |
| 4782 CDON    | ENST00000392693 | p.E909A                  | c.2726      | 0.029523345 | 5.082 | 1 |
| 4783 LHPP    | ENST00000368842 | p.R107C                  | c.319       | 0.011241669 | 6.475 | 1 |
| 4783 LHPP    | ENST00000368842 | p.N134S                  | c.401       | 0.011241669 | 0     | 1 |
| 4784 HUWE1   | ENST00000342160 | p.L4080F                 | c.12240     | 0.013994464 | 6.159 | 1 |
| 4784 HUWE1   | ENST00000342160 | p.L4104V                 | c.12310     | 0.06175623  | 0     | 1 |
| 4784 HUWE1   | ENST00000342160 | p.F4181C                 | c.12542     | 0.047761766 | 4.388 | 1 |
| 4785 KDR     | ENST00000263923 | p.T668K                  | c.2003      | 1.131578894 | 0     | 1 |
| 4785 KDR     | ENST00000263923 | p.T668M                  | c.2003      | 1.131578894 | 0     | 1 |
| 4785 KDR     | ENST00000263923 | p.S691Y                  | c.2072      | 0.263157789 | 2.926 | 1 |
| 4786 CSTA    | ENST00000264474 | p.G75R                   | c.223       | 0.018073253 | 5.79  | 1 |
| 4786 CSTA    | ENST00000264474 | p.E15D                   | c.45        | 0.018073253 | 0     | 1 |
| 4787 KDR     | ENST00000263923 | p.L151R                  | c.452       | 0.046294994 | 0     | 1 |
| 4787 KDR     | ENST00000263923 | p.D180N                  | c.538       | 0.046294994 | 4.433 | 1 |
| 4788 EPHA5   | ENST00000273854 | p.S66L                   | c.197       | 0.027223569 | 5.199 | 1 |
| 4788 EPHA5   | ENST00000273854 | p.Y99H                   | c.295       | 0.027223569 | 0     | 1 |
| 4789 DCPS    | ENST00000263579 | p.A220T                  | c.658       | 1.029564301 | 0     | 2 |
| 4789 DCPS    | ENST00000263579 | p.H279N                  | c.835       | 0.059128603 | 5.08  | 1 |
| 4790 CPN1    | ENST00000370418 | p.G341D                  | c.1022      | 0.069348092 | 0     | 1 |
| 4790 CPN1    | ENST00000370418 | p.V403M                  | c.1207      | 0.069348092 | 3.85  | 1 |
| 4791 NAT2    | ENST00000286479 | p.F7Y                    | c.20        | 0.006973023 | 7.164 | 1 |

|               |                 |          |             |             |       |   |
|---------------|-----------------|----------|-------------|-------------|-------|---|
| 4791 NAT2     | ENST00000286479 | p.T81I   | c.242_243   | 0.006973023 | 0     | 1 |
| 4792 SORBS1   | ENST00000607232 | p.A1058T | c.3172      | 0.157126672 | 2.67  | 1 |
| 4792 SORBS1   | ENST00000607232 | p.P1111S | c.3331      | 0.157126672 | 0     | 1 |
| 4793 DAO      | ENST00000228476 | p.R199W  | c.595       | 1.134064577 | 0     | 1 |
| 4793 DAO      | ENST00000228476 | p.R199Q  | c.596       | 1.134064577 | 0     | 1 |
| 4793 DAO      | ENST00000228476 | p.R283W  | c.847       | 0.268129154 | 2.899 | 1 |
| 4794 XDH      | ENST00000379416 | p.T1033S | c.3098      | 0.017725867 | 5.818 | 1 |
| 4794 XDH      | ENST00000379416 | p.V1082I | c.3244      | 0.017725867 | 0     | 1 |
| 4795 ERAP2    | ENST00000437043 | p.K96N   | c.288       | 0.015030116 | 0     | 1 |
| 4795 ERAP2    | ENST00000437043 | p.Q123E  | c.367       | 0.015030116 | 6.056 | 1 |
| 4796 PC       | ENST00000393958 | p.D799N  | c.2395      | 0.063857505 | 3.969 | 1 |
| 4796 PC       | ENST00000393958 | p.V831M  | c.2491      | 0.063857505 | 0     | 1 |
| 4797 IL3RA    | ENST00000331035 | p.A86P   | c.256       | 1           | 0     | 1 |
| 4797 IL3RA    | ENST00000331035 | p.A86T   | c.256       | 1           | 0     | 1 |
| 4798 SEC24B   | ENST00000504968 | p.N556H  | c.1666      | 0.015030116 | 6.056 | 1 |
| 4798 SEC24B   | ENST00000504968 | p.S1093A | c.3277      | 0.015030116 | 0     | 1 |
| 4799 ALDH5A1  | ENST00000348925 | p.S121R  | c.363       | 0.08820474  | 3.503 | 1 |
| 4799 ALDH5A1  | ENST00000348925 | p.R172H  | c.515       | 0.08820474  | 0     | 1 |
| 4800 HSPA8    | ENST00000227378 | p.Y41H   | c.121       | 1.032284825 | 0     | 2 |
| 4800 HSPA8    | ENST00000227378 | p.E231A  | c.692       | 0.064569649 | 4.953 | 1 |
| 4801 FGF8     | ENST00000320185 | p.R129Q  | c.386       | 0.008559247 | 9.854 | 1 |
| 4801 FGF8     | ENST00000320185 | p.I137M  | c.411       | 0.176428929 | 0     | 1 |
| 4801 FGF8     | ENST00000320185 | p.A169V  | c.506       | 0.15642372  | 2.791 | 1 |
| 4801 FGF8     | ENST00000320185 | p.A181V  | c.542       | 0.035321725 | 5.018 | 1 |
| 4802 NFATC2   | ENST00000396009 | p.E606K  | c.1816      | 0.043888902 | 4.51  | 1 |
| 4802 NFATC2   | ENST00000396009 | p.G663W  | c.1987      | 0.043888902 | 0     | 1 |
| 4803 PLAT     | ENST00000220809 | p.E397K  | c.1189      | 0.273573425 | 1.87  | 1 |
| 4803 PLAT     | ENST00000220809 | p.R524H  | c.1571      | 0.273573425 | 0     | 1 |
| 4804 SNRNP200 | ENST00000323853 | p.E412D  | c.1236      | 0.013965393 | 0     | 1 |
| 4804 SNRNP200 | ENST00000323853 | p.V894A  | c.2681      | 0.013965393 | 6.162 | 1 |
| 4805 ITGA4    | ENST00000397033 | p.D439N  | c.1315      | 0.017264621 | 7.441 | 1 |
| 4805 ITGA4    | ENST00000397033 | p.E508K  | c.1522      | 2.005754874 | 0     | 1 |
| 4805 ITGA4    | ENST00000397033 | p.E508A  | c.1523      | 2.005754874 | 0     | 1 |
| 4805 ITGA4    | ENST00000397033 | p.E508D  | c.1524      | 2.005754874 | 0     | 1 |
| 4806 JMJD6    | ENST00000445478 | p.A75V   | c.224       | 0.007715632 | 7.018 | 1 |
| 4806 JMJD6    | ENST00000445478 | p.R173M  | c.518       | 0.008974206 | 6.8   | 1 |
| 4806 JMJD6    | ENST00000445478 | p.W196C  | c.588       | 0.023509897 | 0     | 1 |
| 4806 JMJD6    | ENST00000445478 | p.P268S  | c.802       | 0.006820059 | 7.196 | 1 |
| 4807 GSG2     | ENST00000325418 | p.R552L  | c.1655      | 0.05212069  | 0     | 1 |
| 4807 GSG2     | ENST00000325418 | p.L669I  | c.2005      | 0.05212069  | 4.262 | 1 |
| 4808 ACE2     | ENST00000427411 | p.N194K  | c.582       | 0.028281452 | 6.144 | 1 |
| 4808 ACE2     | ENST00000427411 | p.H195Y  | c.583       | 1.115663054 | 4.112 | 2 |
| 4808 ACE2     | ENST00000427411 | p.R219H  | c.656       | 1.129803779 | 0     | 1 |
| 4808 ACE2     | ENST00000427411 | p.R219P  | c.656       | 1.129803779 | 0     | 1 |
| 4809 GSTK1    | ENST00000479303 | p.M48I   | c.144       | 0.051545847 | 4.278 | 1 |
| 4809 GSTK1    | ENST00000479303 | p.P3H    | c.8         | 0.051545847 | 0     | 1 |
| 4810 CYP1A1   | ENST00000567032 | p.R377Q  | c.1130      | 1.008980615 | 0     | 2 |
| 4810 CYP1A1   | ENST00000567032 | p.L420V  | c.1258      | 0.010949433 | 7.513 | 1 |
| 4810 CYP1A1   | ENST00000567032 | p.R464C  | c.1390_1389 | 0.007011797 | 8.156 | 1 |

|      |         |                 |         |        |             |       |   |
|------|---------|-----------------|---------|--------|-------------|-------|---|
| 4811 | MAPK14  | ENST00000229795 | p.P191H | c.572  | 0.012242144 | 6.352 | 1 |
| 4812 | LCN1    | ENST00000263598 | p.G77A  | c.230  | 0.009472756 | 6.722 | 1 |
| 4812 | LCN1    | ENST00000263598 | p.C171R | c.511  | 0.009472756 | 0     | 1 |
| 4813 | TTR     | ENST00000237014 | p.L9V   | c.25   | 0.030374406 | 6.041 | 1 |
| 4813 | TTR     | ENST00000237014 | p.R123C | c.367  | 1.015187203 | 0     | 1 |
| 4813 | TTR     | ENST00000237014 | p.R123H | c.368  | 1.015187203 | 0     | 1 |
| 4814 | IL6R    | ENST00000368485 | p.R250I | c.749  | 0.00611683  | 7.353 | 1 |
| 4814 | IL6R    | ENST00000368485 | p.G299R | c.895  | 0.00611683  | 0     | 1 |
| 4815 | SYNCRIP | ENST00000369622 | p.I353M | c.1059 | 0.083215726 | 0     | 1 |
| 4815 | SYNCRIP | ENST00000369622 | p.E397K | c.1189 | 0.083215726 | 3.587 | 1 |
| 4816 | RARB    | ENST00000404969 | p.E343Q | c.1027 | 0.102663838 | 0     | 1 |
| 4816 | RARB    | ENST00000404969 | p.A255T | c.763  | 0.102663838 | 3.284 | 1 |
| 4817 | CHAT    | ENST00000337653 | p.L408H | c.1223 | 0.081559684 | 0     | 1 |
| 4817 | CHAT    | ENST00000337653 | p.A217V | c.650  | 0.081559684 | 3.616 | 1 |
| 4818 | MSN     | ENST00000360270 | p.A532D | c.1595 | 0.071793647 | 3.8   | 1 |
| 4818 | MSN     | ENST00000360270 | p.Q160H | c.480  | 0.071793647 | 0     | 1 |
| 4819 | KLHL40  | ENST00000287777 | p.V553I | c.1657 | 0.071644512 | 0     | 1 |
| 4819 | KLHL40  | ENST00000287777 | p.F608C | c.1823 | 0.071644512 | 3.803 | 1 |
| 4820 | CAB39   | ENST00000409788 | p.L131F | c.393  | 0.045185384 | 4.468 | 1 |
| 4820 | CAB39   | ENST00000409788 | p.S163L | c.488  | 0.045185384 | 0     | 1 |
| 4821 | HGD     | ENST00000283871 | p.S366I | c.1097 | 0.05101269  | 0     | 1 |
| 4821 | HGD     | ENST00000283871 | p.D91H  | c.271  | 0.05101269  | 4.293 | 1 |
| 4822 | PTPRM   | ENST00000400060 | p.A73D  | c.218  | 0.00927781  | 6.752 | 1 |
| 4822 | PTPRM   | ENST00000400060 | p.P110T | c.328  | 0.078003819 | 0     | 1 |
| 4822 | PTPRM   | ENST00000400060 | p.P136R | c.407  | 0.068726009 | 3.863 | 1 |
| 4823 | B3GAT2  | ENST00000230053 | p.V227L | c.679  | 0.027814867 | 0     | 1 |
| 4823 | B3GAT2  | ENST00000230053 | p.E284V | c.851  | 0.027814867 | 5.168 | 1 |
| 4824 | GFPT1   | ENST00000357308 | p.H377D | c.1129 | 0.011187256 | 6.482 | 1 |
| 4824 | GFPT1   | ENST00000357308 | p.V462A | c.1385 | 0.011187256 | 0     | 1 |
| 4825 | ANXA5   | ENST00000296511 | p.R50H  | c.149  | 0.043164827 | 4.534 | 1 |
| 4825 | ANXA5   | ENST00000296511 | p.A83S  | c.247  | 0.043164827 | 0     | 1 |
| 4826 | AOC3    | ENST00000308423 | p.T381M | c.1142 | 0.086930123 | 0     | 1 |
| 4826 | AOC3    | ENST00000308423 | p.P215L | c.644  | 0.086930123 | 3.524 | 1 |
| 4828 | CYP2C9  | ENST00000260682 | p.K185T | c.554  | 0.017313005 | 6.852 | 1 |
| 4828 | CYP2C9  | ENST00000260682 | p.E250K | c.748  | 1.008656503 | 0     | 2 |
| 4829 | PPIF    | ENST00000225174 | p.P72Q  | c.215  | 0.051474439 | 0     | 1 |
| 4829 | PPIF    | ENST00000225174 | p.Y121S | c.362  | 0.051474439 | 4.28  | 1 |
| 4830 | IFNB1   | ENST00000380232 | p.D94N  | c.280  | 0.010657405 | 0     | 1 |
| 4830 | IFNB1   | ENST00000380232 | p.E158K | c.472  | 0.010657405 | 6.552 | 1 |
| 4831 | ASL     | ENST00000304874 | p.A404T | c.1210 | 0.010957025 | 6.512 | 1 |
| 4831 | ASL     | ENST00000304874 | p.W428S | c.1283 | 0.010957025 | 0     | 1 |
| 4832 | BTK     | ENST00000308731 | p.K60E  | c.178  | 0.071828285 | 3.89  | 1 |
| 4832 | BTK     | ENST00000308731 | p.E108K | c.322  | 0.132335469 | 0     | 1 |
| 4832 | BTK     | ENST00000308731 | p.N161T | c.482  | 0.069260225 | 3.946 | 1 |
| 4833 | CCL20   | ENST00000358813 | p.L34F  | c.100  | 0.25348987  | 0     | 1 |
| 4833 | CCL20   | ENST00000358813 | p.I60N  | c.179  | 0.25348987  | 1.98  | 1 |
| 4834 | ABCB10  | ENST00000344517 | p.W440G | c.1318 | 1.011454037 | 0     | 1 |
| 4834 | ABCB10  | ENST00000344517 | p.W440C | c.1320 | 1.011454037 | 0     | 1 |
| 4834 | ABCB10  | ENST00000344517 | p.A296V | c.887  | 0.022908074 | 6.448 | 1 |



|      |        |                 |                    |           |             |       |   |
|------|--------|-----------------|--------------------|-----------|-------------|-------|---|
| 4835 | SGPL1  | ENST00000373202 | p.V378I            | c.1132    | 0.009080579 | 0     | 1 |
| 4835 | SGPL1  | ENST00000373202 | p.K219R            | c.656     | 0.009080579 | 6.783 | 1 |
| 4836 | SELE   | ENST00000333360 | p.I56V             | c.166     | 0.061896429 | 4.014 | 1 |
| 4836 | SELE   | ENST00000333360 | p.E92K             | c.274     | 0.061896429 | 0     | 1 |
| 4837 | APLP1  | ENST00000221891 | p.E393D            | c.1179    | 0.01147788  | 0     | 1 |
| 4837 | APLP1  | ENST00000221891 | p.R415C            | c.1243    | 0.01147788  | 6.445 | 1 |
| 4838 | CAPN2  | ENST00000295006 | p.R469W            | c.1405    | 0.091125586 | 0     | 1 |
| 4838 | CAPN2  | ENST00000295006 | p.E205K            | c.613     | 0.091125586 | 3.456 | 1 |
| 4839 | PCDH9  | ENST00000544246 | p.A265V            | c.794     | 0.075362989 | 0     | 1 |
| 4839 | PCDH9  | ENST00000544246 | p.L318F            | c.954     | 0.075362989 | 3.73  | 1 |
| 4840 | SLC4A1 | ENST00000262418 | p.E68K             | c.202     | 0.124481219 | 0     | 1 |
| 4840 | SLC4A1 | ENST00000262418 | p.G172V            | c.515     | 0.124481219 | 3.006 | 1 |
| 4841 | CTTN   | ENST00000376561 | p.D479V            | c.1436    | 0.013489681 | 0     | 1 |
| 4842 | GBP1   | ENST00000370473 | p.R406H            | c.1217    | 0.142694338 | 0     | 1 |
| 4842 | GBP1   | ENST00000370473 | p.P451L            | c.1352    | 0.142694338 | 2.809 | 1 |
| 4843 | PCK1   | ENST00000319441 | p.P273H            | c.818     | 0.01406253  | 0     | 1 |
| 4843 | PCK1   | ENST00000319441 | p.K304M            | c.911     | 0.01406253  | 6.152 | 1 |
| 4844 | UPF3B  | ENST00000276201 | p.H70Y             | c.208     | 0.08478777  | 4.56  | 1 |
| 4844 | UPF3B  | ENST00000276201 | p.P75L             | c.224     | 0.019763743 | 6.661 | 1 |
| 4844 | UPF3B  | ENST00000276201 | p.R113C            | c.337     | 1.052275757 | 0     | 1 |
| 4844 | UPF3B  | ENST00000276201 | p.R113H            | c.338     | 1.052275757 | 0     | 1 |
| 4845 | AP1B1  | ENST00000405198 | p.D234N            | c.700     | 0.006973023 | 7.164 | 1 |
| 4845 | AP1B1  | ENST00000405198 | p.D273N            | c.817     | 0.006973023 | 0     | 1 |
| 4846 | GRM3   | ENST00000361669 | p.E49K             | c.145     | 0.168754748 | 0     | 1 |
| 4846 | GRM3   | ENST00000361669 | p.D102N            | c.304     | 0.168754748 | 2.567 | 1 |
| 4847 | GRM5   | ENST00000305447 | p.M202V            | c.604     | 0.078563336 | 0     | 1 |
| 4847 | GRM5   | ENST00000305447 | p.S304R            | c.912     | 0.078563336 | 3.67  | 1 |
| 4848 | FDPS   | ENST00000356657 | p.D197G            | c.590     | 0.110108672 | 3.183 | 1 |
| 4848 | FDPS   | ENST00000356657 | p.D240Y            | c.718     | 0.110108672 | 0     | 1 |
| 4849 | SRP19  | ENST00000505459 | p.N43S             | c.128     | 0.015789637 | 6.134 | 1 |
| 4849 | SRP19  | ENST00000505459 | p.P44L             | c.131     | 0.110444829 | 3.199 | 1 |
| 4849 | SRP19  | ENST00000505459 | p.P20H             | c.59      | 0.123133357 | 0     | 1 |
| 4850 | MAP2K4 | ENST00000415385 | p.L396V            | c.1186    | 1.016676958 | 0     | 1 |
| 4850 | MAP2K4 | ENST00000415385 | p.L396P            | c.1187    | 1.016676958 | 0     | 1 |
| 4850 | MAP2K4 | ENST00000415385 | p.S195L            | c.584     | 1.016676958 | 6.906 | 2 |
| 4851 | TBX5   | ENST00000405440 | p.A130D            | c.389     | 1.023389422 | 0     | 1 |
| 4851 | TBX5   | ENST00000405440 | p.A130V            | c.389     | 1.023389422 | 0     | 1 |
| 4851 | TBX5   | ENST00000405440 | p.H164Y            | c.490     | 0.046778843 | 5.418 | 1 |
| 4852 | GDNF   | ENST00000427982 | p.R129K            | c.386     | 0.003257543 | 9.262 | 1 |
| 4852 | GDNF   | ENST00000427982 | p.E170Q            | c.508     | 1.001628772 | 0     | 1 |
| 4852 | GDNF   | ENST00000427982 | p.E170D            | c.510     | 1.001628772 | 0     | 1 |
| 4853 | SGK1   | ENST00000367858 | p.L279in_frame_del | c.839_837 | 0.13860008  | 0     | 1 |
| 4853 | SGK1   | ENST00000367858 | p.I323V            | c.967     | 0.13860008  | 2.851 | 1 |
| 4854 | PRKAA2 | ENST00000371244 | p.R442K            | c.1325    | 0.011646175 | 0     | 1 |
| 4854 | PRKAA2 | ENST00000371244 | p.M537I            | c.1611    | 0.011646175 | 6.424 | 1 |
| 4855 | MTHFD1 | ENST00000545908 | p.T132I            | c.395     | 0.060917477 | 4.037 | 1 |
| 4855 | MTHFD1 | ENST00000545908 | p.S164F            | c.491     | 0.060917477 | 0     | 1 |
| 4856 | C4A    | ENST00000428956 | p.S1116P           | c.3346    | 0.00669825  | 0     | 1 |
| 4856 | C4A    | ENST00000428956 | p.S1171F           | c.3512    | 0.00669825  | 7.222 | 1 |

|      |         |                 |                    |           |             |       |   |
|------|---------|-----------------|--------------------|-----------|-------------|-------|---|
| 4857 | RET     | ENST00000355710 | p.R813W            | c.2437    | 0.079109787 | 4.66  | 1 |
| 4857 | RET     | ENST00000355710 | p.R912L            | c.2735    | 1.039554894 | 0     | 1 |
| 4857 | RET     | ENST00000355710 | p.R912Q            | c.2735    | 1.039554894 | 0     | 1 |
| 4858 | CFH     | ENST00000367429 | p.P1080L           | c.3239    | 0.02547101  | 0     | 1 |
| 4858 | CFH     | ENST00000367429 | p.S1105Y           | c.3314    | 0.02547101  | 5.295 | 1 |
| 4859 | EPHA2   | ENST00000358432 | p.R425H            | c.1274    | 1.014288517 | 0     | 1 |
| 4859 | EPHA2   | ENST00000358432 | p.R425L            | c.1274    | 1.014288517 | 0     | 1 |
| 4859 | EPHA2   | ENST00000358432 | p.P329S            | c.985     | 0.028577034 | 6.129 | 1 |
| 4860 | CA8     | ENST00000317995 | p.N84S             | c.251     | 0.118421259 | 3.078 | 1 |
| 4860 | CA8     | ENST00000317995 | p.Q190H            | c.570     | 0.118421259 | 0     | 1 |
| 4861 | SULT1E1 | ENST00000226444 | p.E55K             | c.163     | 0.39610711  | 2.921 | 1 |
| 4861 | SULT1E1 | ENST00000226444 | p.R77Q             | c.230     | 2.132035703 | 0     | 3 |
| 4862 | NF1     | ENST00000358273 | p.Q1617H           | c.4851    | 0.027814867 | 6.168 | 1 |
| 4862 | NF1     | ENST00000358273 | p.D1837N           | c.5509    | 1.013907433 | 0     | 2 |
| 4863 | ADPRHL2 | ENST00000373178 | p.R245C            | c.733     | 0.060120466 | 4.056 | 1 |
| 4863 | ADPRHL2 | ENST00000373178 | p.E266Q            | c.796     | 0.060120466 | 0     | 1 |
| 4864 | CXCR1   | ENST00000295683 | p.R175C            | c.523     | 1.18737495  | 0     | 2 |
| 4864 | CXCR1   | ENST00000295683 | p.V201L            | c.601     | 0.3747499   | 2.416 | 1 |
| 4865 | CTPS2   | ENST00000359276 | p.L432V            | c.1294    | 0.016447362 | 0     | 1 |
| 4865 | CTPS2   | ENST00000359276 | p.I489M            | c.1467    | 0.016447362 | 5.926 | 1 |
| 4866 | DBB2    | ENST00000256996 | p.T371M            | c.1112    | 1.006280086 | 0     | 2 |
| 4866 | DBB2    | ENST00000256996 | p.S396L            | c.1187    | 0.165284309 | 7.315 | 1 |
| 4867 | EIF1AX  | ENST00000379607 | p.S74L             | c.221     | 0.006768257 | 7.207 | 1 |
| 4867 | EIF1AX  | ENST00000379607 | p.A113V            | c.338     | 0.006768257 | 0     | 1 |
| 4868 | CLEC4E  | ENST00000299663 | p.C79R             | c.235     | 0.061001985 | 4.035 | 1 |
| 4868 | CLEC4E  | ENST00000299663 | p.G209E            | c.626     | 0.061001985 | 0     | 1 |
| 4869 | REG3A   | ENST00000305165 | p.G85R             | c.253     | 0.085117091 | 3.833 | 1 |
| 4869 | REG3A   | ENST00000305165 | p.W133L            | c.398     | 0.227958026 | 2.231 | 1 |
| 4869 | REG3A   | ENST00000305165 | p.W158C            | c.474     | 0.283181113 | 0     | 1 |
| 4870 | RPAP3   | ENST00000005386 | p.A282T            | c.844     | 0.082013203 | 3.608 | 1 |
| 4870 | RPAP3   | ENST00000005386 | p.D312Y            | c.934     | 0.082013203 | 0     | 1 |
| 4871 | DLG4    | ENST00000399510 | p.R356Q            | c.1067    | 0.028105572 | 5.153 | 1 |
| 4871 | DLG4    | ENST00000399510 | p.A433T            | c.1297    | 0.028105572 | 0     | 1 |
| 4872 | VDR     | ENST00000550325 | p.R418H            | c.1253    | 0.166200889 | 0     | 1 |
| 4872 | VDR     | ENST00000550325 | p.R171W            | c.511     | 0.166200889 | 2.589 | 1 |
| 4873 | IFNG    | ENST00000229135 | p.S88N             | c.263     | 0.038580081 | 0     | 1 |
| 4873 | IFNG    | ENST00000229135 | p.N33K             | c.99      | 0.038580081 | 4.696 | 1 |
| 4874 | CUTA    | ENST00000374500 | p.C94Y             | c.281     | 0.122173221 | 0     | 1 |
| 4874 | CUTA    | ENST00000374500 | p.E137G            | c.410     | 0.122173221 | 3.033 | 1 |
| 4875 | INADL   | ENST00000371158 | p.I137T            | c.410     | 0.300200857 | 2.736 | 1 |
| 4875 | INADL   | ENST00000371158 | p.A173in_frame_del | c.516_518 | 1.150100428 | 0     | 1 |
| 4875 | INADL   | ENST00000371158 | p.A173T            | c.517     | 1.150100428 | 0     | 1 |
| 4876 | ROCK2   | ENST00000315872 | p.D255E            | c.765     | 0.026515872 | 0     | 1 |
| 4876 | ROCK2   | ENST00000315872 | p.P293T            | c.877     | 0.026515872 | 5.237 | 1 |
| 4877 | SEC23A  | ENST00000307712 | p.L45P             | c.134     | 0.137071449 | 2.867 | 1 |
| 4877 | SEC23A  | ENST00000307712 | p.P453R            | c.1358    | 0.137071449 | 0     | 1 |
| 4878 | LIFR    | ENST00000263409 | p.V277M            | c.829     | 0.045278265 | 6.05  | 1 |
| 4878 | LIFR    | ENST00000263409 | p.E319K            | c.955     | 2.015092755 | 0     | 3 |
| 4879 | DPP4    | ENST00000360534 | p.E668K            | c.2002    | 0.175312406 | 0     | 1 |

|             |                 |                     |           |             |       |   |
|-------------|-----------------|---------------------|-----------|-------------|-------|---|
| 4879 DPP4   | ENST00000360534 | p.G260A             | c.779     | 0.175312406 | 2.512 | 1 |
| 4880 ALKBH8 | ENST00000417449 | p.MV141in_frame_del | c.425_420 | 0.018866884 | 5.728 | 1 |
| 4880 ALKBH8 | ENST00000417449 | p.G218C             | c.652     | 0.018866884 | 0     | 1 |
| 4881 CYP2A6 | ENST00000301141 | p.S465P             | c.1393    | 0.013415085 | 0     | 1 |
| 4881 CYP2A6 | ENST00000301141 | p.D169N             | c.505     | 0.013415085 | 6.22  | 1 |
| 4883 IL1R1  | ENST00000410023 | p.L246M             | c.736     | 0.010401966 | 0     | 1 |
| 4883 IL1R1  | ENST00000410023 | p.I293T             | c.878     | 0.010401966 | 6.587 | 1 |
| 4884 CASC5  | ENST00000346991 | p.R2122I            | c.6365    | 0.012318753 | 0     | 1 |
| 4884 CASC5  | ENST00000346991 | p.E2241K            | c.6721    | 0.012318753 | 6.343 | 1 |
| 4885 IQGAP1 | ENST00000268182 | p.K1165N            | c.3495    | 0.032084048 | 0     | 1 |
| 4885 IQGAP1 | ENST00000268182 | p.P1273A            | c.3817    | 0.032084048 | 4.962 | 1 |
| 4886 CYP1A1 | ENST00000567032 | p.R206H             | c.617     | 0.003955292 | 7.982 | 1 |
| 4886 CYP1A1 | ENST00000567032 | p.Y207C             | c.620     | 0.062586703 | 3.998 | 1 |
| 4886 CYP1A1 | ENST00000567032 | p.M265I             | c.795     | 0.066541996 | 0     | 1 |
| 4887 FAR5B  | ENST00000281828 | p.N503H             | c.1507    | 0.131032809 | 0     | 1 |
| 4887 FAR5B  | ENST00000281828 | p.P577S             | c.1729    | 0.131032809 | 2.932 | 1 |
| 4888 SOS1   | ENST00000426016 | p.D430A             | c.1289    | 0.03179624  | 5.975 | 1 |
| 4888 SOS1   | ENST00000426016 | p.N474K             | c.1422    | 1.01589812  | 0     | 2 |
| 4889 FGF10  | ENST00000264664 | p.T86I              | c.257     | 0.008561029 | 0     | 1 |
| 4889 FGF10  | ENST00000264664 | p.A199V             | c.596     | 0.008561029 | 6.868 | 1 |
| 4890 TF     | ENST00000402696 | p.R475T             | c.1424    | 0.014229216 | 6.135 | 1 |
| 4890 TF     | ENST00000402696 | p.P482S             | c.1444    | 0.010896435 | 6.52  | 1 |
| 4890 TF     | ENST00000402696 | p.L681P             | c.2042    | 0.025125651 | 0     | 1 |
| 4891 GRB10  | ENST00000398812 | p.R520H             | c.1559    | 0.012958118 | 0     | 1 |
| 4891 GRB10  | ENST00000398812 | p.L567M             | c.1699    | 0.012958118 | 6.27  | 1 |
| 4892 ECHS1  | ENST00000368547 | p.M103I             | c.309     | 0.103163176 | 3.277 | 1 |
| 4892 ECHS1  | ENST00000368547 | p.M276V             | c.826     | 0.103163176 | 0     | 1 |
| 4893 GSN    | ENST00000373818 | p.V526A             | c.1577    | 0.028557233 | 0     | 1 |
| 4893 GSN    | ENST00000373818 | p.R741G             | c.2221    | 0.028557233 | 5.13  | 1 |
| 4894 RAB18  | ENST00000423465 | p.L200S             | c.599     | 0.064480199 | 0     | 1 |
| 4894 RAB18  | ENST00000423465 | p.S243T             | c.728     | 0.064480199 | 3.955 | 1 |
| 4895 TATDN3 | ENST00000532324 | p.V146A             | c.437     | 0.010344445 | 0     | 1 |
| 4895 TATDN3 | ENST00000532324 | p.F172L             | c.514     | 0.010344445 | 6.595 | 1 |
| 4896 PRKACA | ENST00000308677 | p.L83P              | c.248     | 1.037917299 | 0     | 2 |
| 4896 PRKACA | ENST00000308677 | p.K318N             | c.954     | 0.075834598 | 4.721 | 1 |
| 4897 RAB7A  | ENST00000265062 | p.A159V             | c.476     | 0.009030365 | 0     | 1 |
| 4897 RAB7A  | ENST00000265062 | p.K31N              | c.93      | 0.009030365 | 6.791 | 1 |
| 4898 ROBO2  | ENST00000332191 | p.E709Q             | c.2125    | 0.22221067  | 0     | 1 |
| 4898 ROBO2  | ENST00000332191 | p.T732A             | c.2194    | 0.22221067  | 2.17  | 1 |
| 4899 CLEC5A | ENST00000546910 | p.E94K              | c.280     | 2.007041019 | 0     | 3 |
| 4899 CLEC5A | ENST00000546910 | p.R135S             | c.403     | 0.022293281 | 7.15  | 1 |
| 4900 PECR   | ENST00000265322 | p.R73Q              | c.218     | 0.059705184 | 4.066 | 1 |
| 4900 PECR   | ENST00000265322 | p.T97A              | c.289     | 0.059705184 | 0     | 1 |
| 4901 NT5C2  | ENST00000404739 | p.K361N             | c.1083    | 0.028222703 | 0     | 1 |
| 4901 NT5C2  | ENST00000404739 | p.R456C             | c.1366    | 0.028222703 | 5.147 | 1 |
| 4902 OAS1   | ENST00000445409 | p.Y51C              | c.152     | 0.011857963 | 6.398 | 1 |
| 4902 OAS1   | ENST00000445409 | p.E101K             | c.301     | 0.011857963 | 0     | 1 |
| 4903 MAPK8  | ENST00000374189 | p.L115I             | c.343     | 1.02110897  | 0     | 2 |
| 4903 MAPK8  | ENST00000374189 | p.E217Q             | c.649     | 0.04221794  | 5.566 | 1 |

|             |                 |          |        |             |       |   |
|-------------|-----------------|----------|--------|-------------|-------|---|
| 4904 MRE11A | ENST00000407439 | p.L47V   | c.139  | 0.012885684 | 0     | 1 |
| 4904 MRE11A | ENST00000407439 | p.E80K   | c.238  | 0.00994371  | 6.652 | 1 |
| 4904 MRE11A | ENST00000407439 | p.V153A  | c.458  | 0.002941974 | 8.409 | 1 |
| 4905 ANK1   | ENST00000396942 | p.A478V  | c.1433 | 0.070756181 | 4.821 | 1 |
| 4905 ANK1   | ENST00000396942 | p.A494T  | c.1480 | 0.015282242 | 7.032 | 1 |
| 4905 ANK1   | ENST00000396942 | p.L522F  | c.1564 | 1.043019212 | 0     | 1 |
| 4905 ANK1   | ENST00000396942 | p.L522H  | c.1565 | 1.043019212 | 0     | 1 |
| 4906 STIM1  | ENST00000300737 | p.R69H   | c.206  | 0.01070182  | 0     | 1 |
| 4906 STIM1  | ENST00000300737 | p.S116N  | c.347  | 0.01070182  | 6.546 | 1 |
| 4907 NUDT10 | ENST00000356450 | p.T93M   | c.278  | 0.063197005 | 3.984 | 1 |
| 4907 NUDT10 | ENST00000356450 | p.A20V   | c.59   | 0.063197005 | 0     | 1 |
| 4909 NEDD4  | ENST00000508342 | p.R541I  | c.1622 | 0.012267627 | 6.349 | 1 |
| 4909 NEDD4  | ENST00000508342 | p.S574I  | c.1721 | 0.012267627 | 0     | 1 |
| 4910 ERBB3  | ENST00000267101 | p.L792V  | c.2374 | 0.014091803 | 6.149 | 1 |
| 4910 ERBB3  | ENST00000267101 | p.S846I  | c.2537 | 0.014091803 | 0     | 1 |
| 4911 TLL1   | ENST00000507499 | p.H252Y  | c.754  | 0.023947187 | 0     | 1 |
| 4911 TLL1   | ENST00000507499 | p.G288R  | c.862  | 0.023947187 | 5.384 | 1 |
| 4912 S100A2 | ENST00000368708 | p.N87S   | c.260  | 0.173258736 | 0     | 1 |
| 4912 S100A2 | ENST00000368708 | p.H17Y   | c.49   | 0.173258736 | 2.529 | 1 |
| 4913 THBS2  | ENST00000366787 | p.L668P  | c.2003 | 0.021567459 | 0     | 1 |
| 4913 THBS2  | ENST00000366787 | p.D943Y  | c.2827 | 0.021567459 | 5.535 | 1 |
| 4914 ZFYVE9 | ENST00000371591 | p.H1350N | c.4048 | 0.019143521 | 5.707 | 1 |
| 4914 ZFYVE9 | ENST00000371591 | p.I1420S | c.4259 | 0.019143521 | 0     | 1 |
| 4915 PRL    | ENST00000306482 | p.W119C  | c.357  | 0.052048486 | 0     | 1 |
| 4915 PRL    | ENST00000306482 | p.T151I  | c.452  | 0.052048486 | 4.264 | 1 |
| 4916 NFATC1 | ENST00000427363 | p.R487C  | c.1459 | 0.248962438 | 2.006 | 1 |
| 4916 NFATC1 | ENST00000427363 | p.T551M  | c.1652 | 0.248962438 | 0     | 1 |
| 4918 NOS3   | ENST00000297494 | p.R262Q  | c.785  | 1.074531805 | 0     | 2 |
| 4918 NOS3   | ENST00000297494 | p.R285H  | c.854  | 0.149063609 | 3.746 | 1 |
| 4919 DBT    | ENST00000370132 | p.R61L   | c.182  | 0.008431471 | 6.89  | 1 |
| 4919 DBT    | ENST00000370132 | p.D96H   | c.286  | 0.003887343 | 8.007 | 1 |
| 4919 DBT    | ENST00000370132 | p.T140M  | c.419  | 0.012318813 | 0     | 1 |
| 4920 HGF    | ENST00000222390 | p.C211F  | c.632  | 0.094795508 | 4.984 | 1 |
| 4920 HGF    | ENST00000222390 | p.A289T  | c.865  | 2.031598503 | 0     | 3 |
| 4921 ITGB2  | ENST00000397850 | p.H371Y  | c.1111 | 0.115615172 | 0     | 1 |
| 4921 ITGB2  | ENST00000397850 | p.R429W  | c.1285 | 0.107172005 | 3.222 | 1 |
| 4921 ITGB2  | ENST00000397850 | p.A430V  | c.1289 | 0.008443167 | 6.888 | 1 |
| 4922 CRADD  | ENST00000332896 | p.L58P   | c.173  | 0.51696504  | 0     | 1 |
| 4922 CRADD  | ENST00000332896 | p.L9H    | c.26   | 0.321699795 | 1.972 | 1 |
| 4922 CRADD  | ENST00000332896 | p.R13H   | c.38   | 0.328865993 | 1.932 | 1 |
| 4923 SEMA7A | ENST00000261918 | p.P201L  | c.602  | 0.069204037 | 3.853 | 1 |
| 4923 SEMA7A | ENST00000261918 | p.P222R  | c.665  | 0.073826892 | 0     | 1 |
| 4923 SEMA7A | ENST00000261918 | p.R261G  | c.781  | 0.009766476 | 7.757 | 1 |
| 4924 ZCWPW2 | ENST00000383768 | p.N70Y   | c.208  | 0.038956287 | 4.682 | 1 |
| 4924 ZCWPW2 | ENST00000383768 | p.W30C   | c.90   | 0.038956287 | 0     | 1 |
| 4925 PDK4   | ENST00000005178 | p.E71K   | c.211  | 0.56134612  | 2.418 | 1 |
| 4925 PDK4   | ENST00000005178 | p.R161Q  | c.482  | 2.187115373 | 0     | 3 |
| 4926 MMP13  | ENST00000260302 | p.A384G  | c.1151 | 0.169810786 | 0     | 1 |
| 4926 MMP13  | ENST00000260302 | p.D432Y  | c.1294 | 0.169810786 | 2.558 | 1 |

|              |                 |         |           |             |       |    |
|--------------|-----------------|---------|-----------|-------------|-------|----|
| 4927 MAOB    | ENST00000378069 | p.F402S | c.1205    | 0.012225184 | 0     | 1  |
| 4927 MAOB    | ENST00000378069 | p.P266L | c.797     | 0.012225184 | 6.354 | 1  |
| 4928 IQSEC1  | ENST00000429247 | p.D455H | c.1363    | 0.001755381 | 0     | 1  |
| 4928 IQSEC1  | ENST00000429247 | p.R496H | c.1487    | 0.001755381 | 9.154 | 1  |
| 4929 RNASE2  | ENST00000304625 | p.Y134F | c.401     | 0.173860246 | 0     | 1  |
| 4929 RNASE2  | ENST00000304625 | p.I160M | c.480     | 0.173860246 | 2.524 | 1  |
| 4930 GART    | ENST00000381831 | p.R424C | c.1270    | 0.042955897 | 0     | 1  |
| 4930 GART    | ENST00000381831 | p.Q241R | c.722     | 0.042955897 | 4.541 | 1  |
| 4931 ADAM22  | ENST00000315984 | p.L370P | c.1109    | 0.004521446 | 0     | 1  |
| 4931 ADAM22  | ENST00000315984 | p.S268F | c.803     | 0.004521446 | 7.789 | 1  |
| 4932 IDH2    | ENST00000330062 | p.R140W | c.418     | 16.22359008 | 0     | 1  |
| 4932 IDH2    | ENST00000330062 | p.R140L | c.419     | 16.22359008 | 0     | 1  |
| 4932 IDH2    | ENST00000330062 | p.R140Q | c.419     | 16.22359008 | 0     | 15 |
| 4932 IDH2    | ENST00000330062 | p.R172K | c.515     | 9.380103138 | 5.483 | 7  |
| 4932 IDH2    | ENST00000330062 | p.R172M | c.515     | 9.380103138 | 5.483 | 1  |
| 4932 IDH2    | ENST00000330062 | p.R172S | c.516     | 9.380103138 | 5.483 | 2  |
| 4933 CP      | ENST00000264613 | p.L805Q | c.2414    | 0.022908074 | 5.448 | 1  |
| 4933 CP      | ENST00000264613 | p.Q970H | c.2910    | 0.022908074 | 0     | 1  |
| 4934 SGPL1   | ENST00000373202 | p.Y416N | c.1246    | 0.008292369 | 0     | 1  |
| 4934 SGPL1   | ENST00000373202 | p.V324A | c.971     | 0.008292369 | 6.914 | 1  |
| 4935 STAT1   | ENST00000409465 | p.H215Y | c.643     | 0.004587742 | 0     | 1  |
| 4935 STAT1   | ENST00000409465 | p.L280M | c.838     | 0.004587742 | 7.768 | 1  |
| 4936 PRDM9   | ENST00000296682 | p.Q255H | c.765     | 0.003786288 | 8.045 | 1  |
| 4936 PRDM9   | ENST00000296682 | p.R323W | c.966_967 | 0.003786288 | 0     | 1  |
| 4937 VCL     | ENST00000211998 | p.S795F | c.2384    | 0.009374776 | 0     | 1  |
| 4937 VCL     | ENST00000211998 | p.Y822C | c.2465    | 0.009374776 | 6.737 | 1  |
| 4938 CALCRL  | ENST00000392370 | p.V78A  | c.233     | 0.010635267 | 0     | 1  |
| 4938 CALCRL  | ENST00000392370 | p.D106G | c.317     | 0.010635267 | 6.555 | 1  |
| 4939 ALDH4A1 | ENST00000290597 | p.R540C | c.1618    | 0.00666121  | 7.23  | 1  |
| 4939 ALDH4A1 | ENST00000290597 | p.V204M | c.610     | 0.143827702 | 0     | 1  |
| 4939 ALDH4A1 | ENST00000290597 | p.V229M | c.685     | 0.137166492 | 2.866 | 1  |
| 4940 PDE1B   | ENST00000243052 | p.P200Q | c.599_600 | 0.059622472 | 0     | 1  |
| 4940 PDE1B   | ENST00000243052 | p.N314Y | c.940     | 0.059622472 | 4.068 | 1  |
| 4941 NPM2    | ENST00000289820 | p.L106R | c.317     | 0.13499707  | 0     | 1  |
| 4941 NPM2    | ENST00000289820 | p.R28W  | c.82      | 0.13499707  | 2.889 | 1  |
| 4942 NTRK1   | ENST00000524377 | p.R682H | c.2045    | 0.022158438 | 5.496 | 1  |
| 4942 NTRK1   | ENST00000524377 | p.I699V | c.2095    | 0.010230355 | 6.611 | 1  |
| 4942 NTRK1   | ENST00000524377 | p.D738N | c.2212    | 0.032388793 | 0     | 1  |
| 4943 RAE1    | ENST00000527947 | p.T103M | c.308     | 0.017886315 | 6.805 | 1  |
| 4943 RAE1    | ENST00000527947 | p.A124T | c.370     | 1.008943158 | 0     | 2  |
| 4944 NRP1    | ENST00000374867 | p.R402Q | c.1205    | 0.098960733 | 3.337 | 1  |
| 4944 NRP1    | ENST00000374867 | p.G331S | c.991_990 | 0.098960733 | 0     | 1  |
| 4945 LAMP3   | ENST00000265598 | p.D357N | c.1069    | 1.015920175 | 0     | 2  |
| 4945 LAMP3   | ENST00000265598 | p.K224N | c.672     | 0.03184035  | 5.973 | 1  |
| 4946 RPS21   | ENST00000370592 | p.K41T  | c.122     | 0.003393524 | 0     | 1  |
| 4947 TGM3    | ENST00000381458 | p.A391V | c.1172    | 0.013021144 | 6.263 | 1  |
| 4947 TGM3    | ENST00000381458 | p.L460F | c.1378    | 0.013021144 | 0     | 1  |
| 4948 SDR39U1 | ENST00000399395 | p.A167V | c.500     | 0.013859317 | 0     | 1  |
| 4948 SDR39U1 | ENST00000399395 | p.R255Q | c.764     | 0.013859317 | 6.173 | 1  |

|      |         |                 |          |             |             |       |   |
|------|---------|-----------------|----------|-------------|-------------|-------|---|
| 4949 | EPRS    | ENST00000366923 | p.G1239A | c.3716      | 0.016265962 | 5.942 | 1 |
| 4949 | EPRS    | ENST00000366923 | p.R1278L | c.3833      | 0.016265962 | 0     | 1 |
| 4950 | KHK     | ENST00000260599 | p.H137Q  | c.411       | 0.022813    | 5.454 | 1 |
| 4950 | KHK     | ENST00000260599 | p.R167W  | c.499       | 0.022813    | 0     | 1 |
| 4951 | F11     | ENST00000403665 | p.E305K  | c.913       | 0.075362989 | 4.73  | 1 |
| 4951 | F11     | ENST00000403665 | p.R326H  | c.977       | 1.037681495 | 0     | 2 |
| 4952 | PABPC1  | ENST00000318607 | p.R94H   | c.281       | 0.081503171 | 4.617 | 1 |
| 4952 | PABPC1  | ENST00000318607 | p.A181T  | c.541       | 1.040751585 | 0     | 2 |
| 4953 | ARR3    | ENST00000307959 | p.L44I   | c.130       | 0.021050525 | 5.57  | 1 |
| 4953 | ARR3    | ENST00000307959 | p.A148D  | c.443       | 0.021050525 | 0     | 1 |
| 4954 | DCUN1D1 | ENST00000292782 | p.S101R  | c.303       | 0.009611651 | 6.701 | 1 |
| 4954 | DCUN1D1 | ENST00000292782 | p.P142H  | c.425       | 0.009611651 | 0     | 1 |
| 4955 | KDM1A   | ENST00000542151 | p.W670R  | c.2008      | 0.109651694 | 3.189 | 1 |
| 4955 | KDM1A   | ENST00000542151 | p.I804V  | c.2410      | 0.109651694 | 0     | 1 |
| 4956 | GGA2    | ENST00000309859 | p.W65C   | c.195       | 0.12410922  | 0     | 1 |
| 4956 | GGA2    | ENST00000309859 | p.R105C  | c.313       | 0.069671548 | 3.925 | 1 |
| 4956 | GGA2    | ENST00000309859 | p.E109K  | c.325       | 0.062110638 | 4.101 | 1 |
| 4957 | SSH2    | ENST00000540801 | p.M421I  | c.1263      | 0.005444442 | 0     | 1 |
| 4957 | SSH2    | ENST00000540801 | p.T456I  | c.1367      | 0.005444442 | 7.521 | 1 |
| 4958 | MTMR2   | ENST00000352297 | p.R387Q  | c.1160      | 0.010082519 | 0     | 1 |
| 4958 | MTMR2   | ENST00000352297 | p.R194H  | c.581       | 0.010082519 | 6.632 | 1 |
| 4959 | SYK     | ENST00000375754 | p.E362K  | c.1083_1084 | 0.024895003 | 5.328 | 1 |
| 4959 | SYK     | ENST00000375754 | p.G437E  | c.1310      | 0.024895003 | 0     | 1 |
| 4960 | IL3     | ENST00000296870 | p.L72F   | c.214       | 0.25348987  | 0     | 1 |
| 4960 | IL3     | ENST00000296870 | p.T112M  | c.335       | 0.25348987  | 1.98  | 1 |
| 4961 | PKLR    | ENST00000342741 | p.Q353H  | c.1059      | 0.007774685 | 7.007 | 1 |
| 4961 | PKLR    | ENST00000342741 | p.T384M  | c.1151      | 0.06886907  | 3.86  | 1 |
| 4961 | PKLR    | ENST00000342741 | p.L76K   | c.227_226   | 0.076643755 | 0     | 1 |
| 4962 | CTSK    | ENST00000271651 | p.Y181H  | c.541       | 0.061639544 | 0     | 1 |
| 4962 | CTSK    | ENST00000271651 | p.E226Q  | c.676       | 0.061639544 | 4.02  | 1 |
| 4963 | PFKM    | ENST00000340802 | p.L459P  | c.1376      | 0.022550051 | 0     | 1 |
| 4963 | PFKM    | ENST00000340802 | p.V527A  | c.1580      | 0.010145614 | 6.623 | 1 |
| 4963 | PFKM    | ENST00000340802 | p.K749T  | c.2246      | 0.012404436 | 6.333 | 1 |
| 4964 | S100B   | ENST00000291700 | p.I37M   | c.111       | 0.243332344 | 2.039 | 1 |
| 4964 | S100B   | ENST00000291700 | p.F77S   | c.230       | 0.243332344 | 0     | 1 |
| 4965 | TREML1  | ENST00000426005 | p.E101K  | c.301       | 0.069108166 | 3.855 | 1 |
| 4965 | TREML1  | ENST00000426005 | p.P23L   | c.68        | 0.069108166 | 0     | 1 |
| 4966 | DOCK2   | ENST00000256935 | p.R1446Q | c.4337      | 0.027603595 | 0     | 1 |
| 4966 | DOCK2   | ENST00000256935 | p.Q1489H | c.4467      | 0.027603595 | 5.179 | 1 |
| 4967 | RORC    | ENST00000392697 | p.R428C  | c.1282      | 0.13887491  | 0     | 1 |
| 4967 | RORC    | ENST00000392697 | p.S452N  | c.1355      | 0.039013426 | 4.822 | 1 |
| 4967 | RORC    | ENST00000392697 | p.F455L  | c.1365      | 0.107181182 | 3.272 | 1 |
| 4968 | MSRB1   | ENST00000399753 | p.P44S   | c.130       | 0.075362989 | 3.73  | 1 |
| 4968 | MSRB1   | ENST00000399753 | p.Q220K  | c.658       | 0.075362989 | 0     | 1 |
| 4969 | GAD2    | ENST00000259271 | p.D134V  | c.401       | 0.025683756 | 0     | 1 |
| 4969 | GAD2    | ENST00000259271 | p.A170E  | c.509       | 0.025683756 | 5.283 | 1 |
| 4970 | GALNS   | ENST00000268695 | p.H443Y  | c.1327      | 0.008037709 | 0     | 1 |
| 4970 | GALNS   | ENST00000268695 | p.S53F   | c.158       | 0.008037709 | 6.959 | 1 |
| 4971 | APOH    | ENST00000205948 | p.P85S   | c.253       | 0.059416194 | 0     | 1 |

|                |                 |          |        |             |       |   |
|----------------|-----------------|----------|--------|-------------|-------|---|
| 4971 APOH      | ENST00000205948 | p.G128E  | c.383  | 0.059416194 | 4.073 | 1 |
| 4972 APPL2     | ENST00000551662 | p.V25M   | c.73   | 0.018123432 | 5.786 | 1 |
| 4972 APPL2     | ENST00000551662 | p.V323M  | c.967  | 0.018123432 | 0     | 1 |
| 4973 SRC       | ENST00000445403 | p.G347E  | c.1040 | 0.064973715 | 0     | 1 |
| 4973 SRC       | ENST00000445403 | p.R391C  | c.1171 | 0.064973715 | 3.944 | 1 |
| 4974 PLK1      | ENST00000300093 | p.A520T  | c.1558 | 0.243792182 | 4.598 | 1 |
| 4974 PLK1      | ENST00000300093 | p.Y582C  | c.1745 | 0.17452172  | 7.231 | 1 |
| 4974 PLK1      | ENST00000300093 | p.M586V  | c.1756 | 1.04794842  | 0     | 2 |
| 4975 FN1       | ENST00000354785 | p.C518Y  | c.1553 | 0.012762015 | 0     | 1 |
| 4975 FN1       | ENST00000354785 | p.R550L  | c.1649 | 0.012762015 | 6.292 | 1 |
| 4976 IL1A      | ENST00000263339 | p.M127I  | c.381  | 0.028855697 | 0     | 1 |
| 4976 IL1A      | ENST00000263339 | p.G169C  | c.505  | 0.028855697 | 5.115 | 1 |
| 4977 ETV6      | ENST00000396373 | p.L79S   | c.236  | 0.086629368 | 3.529 | 1 |
| 4977 ETV6      | ENST00000396373 | p.S109A  | c.325  | 0.086629368 | 0     | 1 |
| 4978 KDM3B     | ENST00000314358 | p.V1417L | c.4249 | 0.156764052 | 7.665 | 1 |
| 4978 KDM3B     | ENST00000314358 | p.S1418L | c.4253 | 1.038466639 | 0     | 2 |
| 4978 KDM3B     | ENST00000314358 | p.A1680V | c.5039 | 0.213988309 | 4.898 | 1 |
| 4979 GUCY1A3   | ENST00000296518 | p.T621S  | c.1861 | 0.014348065 | 0     | 1 |
| 4979 GUCY1A3   | ENST00000296518 | p.G652E  | c.1955 | 0.014348065 | 6.123 | 1 |
| 4980 TLR8      | ENST00000311912 | p.N658T  | c.1973 | 0.013396501 | 6.222 | 1 |
| 4980 TLR8      | ENST00000311912 | p.A682T  | c.2044 | 0.064257114 | 3.96  | 1 |
| 4980 TLR8      | ENST00000311912 | p.R707H  | c.2120 | 0.077653615 | 0     | 1 |
| 4981 SERPINA12 | ENST00000556881 | p.G250D  | c.749  | 0.006215129 | 7.33  | 1 |
| 4981 SERPINA12 | ENST00000556881 | p.L274F  | c.820  | 0.006215129 | 0     | 1 |
| 4982 NFASC     | ENST00000367172 | p.R77Q   | c.230  | 0.101040109 | 0     | 1 |
| 4982 NFASC     | ENST00000367172 | p.E145K  | c.433  | 0.101040109 | 3.307 | 1 |
| 4983 GTF2F1    | ENST00000394456 | p.E136K  | c.406  | 0.132310549 | 2.918 | 1 |
| 4983 GTF2F1    | ENST00000394456 | p.R17L   | c.50   | 0.132310549 | 0     | 1 |
| 4984 SYMPK     | ENST00000245934 | p.R148W  | c.442  | 1.013878544 | 0     | 1 |
| 4984 SYMPK     | ENST00000245934 | p.R148L  | c.443  | 1.013878544 | 0     | 1 |
| 4984 SYMPK     | ENST00000245934 | p.Y222C  | c.665  | 0.027757087 | 6.171 | 1 |
| 4985 EPHX2     | ENST00000521400 | p.L417S  | c.1250 | 0.010919117 | 0     | 1 |
| 4985 EPHX2     | ENST00000521400 | p.V498M  | c.1492 | 0.010919117 | 6.517 | 1 |
| 4986 CHAT      | ENST00000337653 | p.R365W  | c.1093 | 0.095061172 | 0     | 1 |
| 4986 CHAT      | ENST00000337653 | p.L282P  | c.845  | 0.095061172 | 3.395 | 1 |
| 4987 SCO1      | ENST00000255390 | p.W159L  | c.476  | 0.049309178 | 0     | 1 |
| 4987 SCO1      | ENST00000255390 | p.P198L  | c.593  | 0.049309178 | 4.342 | 1 |
| 4988 ACAT1     | ENST00000265838 | p.G57C   | c.169  | 0.007249012 | 0     | 1 |
| 4988 ACAT1     | ENST00000265838 | p.V240D  | c.719  | 0.007249012 | 7.108 | 1 |
| 4989 POT1      | ENST00000357628 | p.I78T   | c.233  | 0.099373156 | 0     | 1 |
| 4989 POT1      | ENST00000357628 | p.R137L  | c.410  | 0.099373156 | 3.331 | 1 |
| 4990 CKB       | ENST00000348956 | p.D221Y  | c.661  | 0.049755506 | 4.329 | 1 |
| 4990 CKB       | ENST00000348956 | p.E306K  | c.916  | 0.049755506 | 0     | 1 |
| 4991 CUL4B     | ENST00000404115 | p.E738Q  | c.2212 | 0.015441963 | 0     | 1 |
| 4991 CUL4B     | ENST00000404115 | p.D812H  | c.2434 | 0.015441963 | 6.017 | 1 |
| 4992 LRRC4     | ENST00000249363 | p.A395T  | c.1183 | 0.023633875 | 5.403 | 1 |
| 4992 LRRC4     | ENST00000249363 | p.G264W  | c.790  | 0.028124089 | 0     | 1 |
| 4992 LRRC4     | ENST00000249363 | p.L285I  | c.853  | 0.004490214 | 7.799 | 1 |
| 4993 ITGA5     | ENST00000293379 | p.G413E  | c.1238 | 0.071992978 | 0     | 1 |

|      |         |                 |                       |             |             |       |   |
|------|---------|-----------------|-----------------------|-------------|-------------|-------|---|
| 4993 | ITGA5   | ENST00000293379 | p.G457V               | c.1370      | 0.071992978 | 3.796 | 1 |
| 4994 | NOTCH1  | ENST00000277541 | p.C461Y               | c.1382      | 0.056289124 | 0     | 1 |
| 4994 | NOTCH1  | ENST00000277541 | p.G484V               | c.1451      | 0.056289124 | 4.151 | 1 |
| 4995 | CTSE    | ENST00000361052 | p.R393C               | c.1177      | 0.025260027 | 5.307 | 1 |
| 4995 | CTSE    | ENST00000361052 | p.F246L               | c.738       | 0.025260027 | 0     | 1 |
| 4996 | TGFBR2  | ENST00000359013 | p.K151T               | c.452       | 0.013331658 | 6.229 | 1 |
| 4996 | TGFBR2  | ENST00000359013 | p.F174L               | c.522       | 0.013331658 | 0     | 1 |
| 4997 | PRPF8   | ENST00000572621 | p.A1847T              | c.5539      | 1.031119496 | 6.591 | 2 |
| 4997 | PRPF8   | ENST00000572621 | p.H1875R              | c.5624      | 2.020746331 | 0     | 1 |
| 4997 | PRPF8   | ENST00000572621 | p.HL1875in_frame_delQ | c.5627_5625 | 2.020746331 | 0     | 1 |
| 4997 | PRPF8   | ENST00000572621 | p.HL1875in_frame_del  | c.5629_5624 | 2.020746331 | 0     | 1 |
| 4998 | RHOB    | ENST00000272233 | p.S88N                | c.263       | 0.023617499 | 5.404 | 1 |
| 4998 | RHOB    | ENST00000272233 | p.D13Y                | c.37        | 0.023617499 | 0     | 1 |
| 4999 | IL6ST   | ENST00000381287 | p.E138A               | c.413       | 0.24570515  | 0     | 1 |
| 4999 | IL6ST   | ENST00000381287 | p.N223S               | c.668       | 0.24570515  | 2.025 | 1 |
| 5000 | GGT1    | ENST00000406383 | p.T456S               | c.1366      | 1.032735504 | 0     | 1 |
| 5000 | GGT1    | ENST00000406383 | p.T456M               | c.1367      | 1.032735504 | 0     | 1 |
| 5000 | GGT1    | ENST00000406383 | p.G283R               | c.847       | 0.065471008 | 4.933 | 1 |
| 5001 | GNB1    | ENST00000378609 | p.D205N               | c.613       | 0.031774209 | 4.976 | 1 |
| 5001 | GNB1    | ENST00000378609 | p.D228N               | c.682       | 0.031774209 | 0     | 1 |
| 5002 | SETD2   | ENST00000409792 | p.K1560R              | c.4679      | 1.099995016 | 0     | 1 |
| 5002 | SETD2   | ENST00000409792 | p.K1560N              | c.4680      | 1.099995016 | 0     | 1 |
| 5002 | SETD2   | ENST00000409792 | p.H1603R              | c.4808      | 0.199990032 | 3.322 | 1 |
| 5003 | C12orf5 | ENST00000179259 | p.V94A                | c.281       | 0.026259805 | 5.251 | 1 |
| 5003 | C12orf5 | ENST00000179259 | p.G122A               | c.365       | 0.026259805 | 0     | 1 |
| 5004 | PTPRS   | ENST00000372412 | p.D138G               | c.413       | 0.134343647 | 0     | 1 |
| 5004 | PTPRS   | ENST00000372412 | p.S159N               | c.476       | 0.134343647 | 2.896 | 1 |
| 5005 | DYNLRB1 | ENST00000374846 | p.R124C               | c.370       | 0.06146888  | 0     | 1 |
| 5005 | DYNLRB1 | ENST00000374846 | p.E148K               | c.442       | 0.06146888  | 4.024 | 1 |
| 5006 | ACO1    | ENST00000379923 | p.L633Q               | c.1898      | 0.065289735 | 0     | 1 |
| 5006 | ACO1    | ENST00000379923 | p.P111T               | c.331       | 0.065289735 | 3.937 | 1 |
| 5007 | EGFR    | ENST00000275493 | p.E160K               | c.478       | 0.01551707  | 6.01  | 1 |
| 5007 | EGFR    | ENST00000275493 | p.S198R               | c.594       | 0.01551707  | 0     | 1 |
| 5008 | PPM1A   | ENST00000325642 | p.D182G               | c.545       | 0.042600081 | 0     | 1 |
| 5008 | PPM1A   | ENST00000325642 | p.A269S               | c.805       | 0.042600081 | 4.553 | 1 |
| 5009 | TDP1    | ENST00000393454 | p.A568G               | c.1703      | 0.008263679 | 0     | 1 |
| 5009 | TDP1    | ENST00000393454 | p.N162Y               | c.483_484   | 0.008263679 | 6.919 | 1 |
| 5010 | HTRA1   | ENST00000368984 | p.G213R               | c.637       | 0.020193013 | 5.63  | 1 |
| 5010 | HTRA1   | ENST00000368984 | p.D257Y               | c.769       | 0.020193013 | 0     | 1 |
| 5011 | GALT    | ENST00000378842 | p.M341T               | c.1022      | 0.008596708 | 0     | 1 |
| 5011 | GALT    | ENST00000378842 | p.R201H               | c.602       | 0.008596708 | 6.862 | 1 |
| 5012 | FANCM   | ENST00000267430 | p.M2000I              | c.6000      | 1.077696854 | 0     | 2 |
| 5012 | FANCM   | ENST00000267430 | p.I2022M              | c.6066      | 0.155393709 | 3.686 | 1 |
| 5013 | CEACAM1 | ENST00000161559 | p.E71K                | c.211       | 0.015071847 | 0     | 1 |
| 5013 | CEACAM1 | ENST00000161559 | p.G136E               | c.407       | 0.015071847 | 6.052 | 1 |
| 5014 | ERBB3   | ENST00000267101 | p.S467F               | c.1400      | 0.256316809 | 2.964 | 1 |
| 5014 | ERBB3   | ENST00000267101 | p.R490H               | c.1469      | 1.128158405 | 0     | 2 |
| 5015 | FTO     | ENST00000471389 | p.K391Q               | c.1171      | 0.059457392 | 0     | 1 |
| 5015 | FTO     | ENST00000471389 | p.E129K               | c.385       | 0.059457392 | 4.072 | 1 |



|      |         |                 |          |             |             |       |   |
|------|---------|-----------------|----------|-------------|-------------|-------|---|
| 5016 | TPSAB1  | ENST00000461509 | p.P151H  | c.452       | 0.055475709 | 4.172 | 1 |
| 5016 | TPSAB1  | ENST00000461509 | p.G159E  | c.476       | 0.006862738 | 7.187 | 1 |
| 5016 | TPSAB1  | ENST00000461509 | p.A246V  | c.737       | 0.062338447 | 0     | 1 |
| 5017 | AKR1C3  | ENST00000380554 | p.T82N   | c.245       | 0.084202099 | 0     | 1 |
| 5017 | AKR1C3  | ENST00000380554 | p.V111L  | c.331       | 0.084202099 | 3.57  | 1 |
| 5018 | PDXK    | ENST00000291565 | p.V229I  | c.685       | 0.015931214 | 0     | 1 |
| 5018 | PDXK    | ENST00000291565 | p.P286R  | c.857       | 0.015931214 | 5.972 | 1 |
| 5019 | POLR2H  | ENST00000429568 | p.L39V   | c.115       | 0.176531801 | 2.502 | 1 |
| 5019 | POLR2H  | ENST00000429568 | p.A146T  | c.435_436   | 0.176531801 | 0     | 1 |
| 5020 | ALB     | ENST00000295897 | p.L371R  | c.1112      | 0.048900736 | 0     | 1 |
| 5020 | ALB     | ENST00000295897 | p.A234D  | c.701       | 0.048900736 | 4.354 | 1 |
| 5021 | HDDC2   | ENST00000398153 | p.D62N   | c.184       | 0.039118639 | 4.676 | 1 |
| 5021 | HDDC2   | ENST00000398153 | p.F138Y  | c.413       | 0.039118639 | 0     | 1 |
| 5022 | ADAMTS5 | ENST00000284987 | p.P476L  | c.1427      | 0.074842419 | 0     | 1 |
| 5022 | ADAMTS5 | ENST00000284987 | p.A314P  | c.940       | 0.074842419 | 3.74  | 1 |
| 5023 | HSD17B4 | ENST00000504811 | p.D385Y  | c.1153      | 0.052192995 | 4.26  | 1 |
| 5023 | HSD17B4 | ENST00000504811 | p.Q571R  | c.1712      | 0.052192995 | 0     | 1 |
| 5024 | MTOR    | ENST00000361445 | p.I2333M | c.6999      | 0.034148417 | 6.457 | 1 |
| 5024 | MTOR    | ENST00000361445 | p.I2500F | c.7498      | 2.011382806 | 0     | 1 |
| 5024 | MTOR    | ENST00000361445 | p.I2500M | c.7500      | 2.011382806 | 0     | 2 |
| 5025 | NAALAD2 | ENST00000534061 | p.E135Q  | c.403       | 0.023486898 | 0     | 1 |
| 5025 | NAALAD2 | ENST00000534061 | p.A242E  | c.725       | 0.023486898 | 5.412 | 1 |
| 5026 | VTA1    | ENST00000367630 | p.C38G   | c.112       | 0.196963472 | 2.344 | 1 |
| 5026 | VTA1    | ENST00000367630 | p.V127F  | c.379       | 0.196963472 | 0     | 1 |
| 5027 | TGFBR1  | ENST00000552516 | p.R259L  | c.776       | 0.008212288 | 0     | 1 |
| 5027 | TGFBR1  | ENST00000552516 | p.I324V  | c.970       | 0.008212288 | 6.928 | 1 |
| 5028 | MTMR2   | ENST00000352297 | p.L361F  | c.1081      | 0.012191336 | 6.358 | 1 |
| 5028 | MTMR2   | ENST00000352297 | p.V491I  | c.1471      | 0.012191336 | 0     | 1 |
| 5029 | BRD1    | ENST00000404034 | p.M362I  | c.1086      | 0.260362765 | 0     | 1 |
| 5029 | BRD1    | ENST00000404034 | p.A383T  | c.1147      | 0.256292024 | 1.972 | 1 |
| 5029 | BRD1    | ENST00000404034 | p.T389M  | c.1166      | 0.006855947 | 7.516 | 1 |
| 5030 | MDM2    | ENST00000462284 | p.R422I  | c.1265_1266 | 0.021123607 | 0     | 1 |
| 5030 | MDM2    | ENST00000462284 | p.I446V  | c.1336      | 0.021123607 | 5.565 | 1 |
| 5031 | MTR     | ENST00000366577 | p.P953L  | c.2858      | 0.01053256  | 0     | 1 |
| 5031 | MTR     | ENST00000366577 | p.D1095N | c.3283      | 0.01053256  | 6.569 | 1 |
| 5032 | PITRM1  | ENST00000380989 | p.H511Y  | c.1531      | 0.009813612 | 0     | 1 |
| 5032 | PITRM1  | ENST00000380989 | p.V864L  | c.2590      | 0.009813612 | 6.671 | 1 |
| 5033 | AURKB   | ENST00000316199 | p.I129T  | c.386       | 0.042276507 | 4.564 | 1 |
| 5033 | AURKB   | ENST00000316199 | p.R249H  | c.746       | 0.042276507 | 0     | 1 |
| 5034 | EPHX2   | ENST00000521400 | p.R113S  | c.339       | 0.018274807 | 0     | 1 |
| 5034 | EPHX2   | ENST00000521400 | p.F149S  | c.446       | 0.018274807 | 5.774 | 1 |
| 5035 | KIT     | ENST00000288135 | p.A219V  | c.656       | 0.062847536 | 0     | 1 |
| 5035 | KIT     | ENST00000288135 | p.T302I  | c.905       | 0.062847536 | 3.992 | 1 |
| 5036 | EPHA3   | ENST00000336596 | p.V609A  | c.1826      | 0.161320311 | 3.632 | 1 |
| 5036 | EPHA3   | ENST00000336596 | p.L668M  | c.2002      | 1.080660156 | 0     | 1 |
| 5036 | EPHA3   | ENST00000336596 | p.L668Q  | c.2003      | 1.080660156 | 0     | 1 |
| 5037 | GRM7    | ENST00000467425 | p.T223I  | c.668       | 0.02335702  | 5.42  | 1 |
| 5037 | GRM7    | ENST00000467425 | p.R255S  | c.765       | 0.02335702  | 0     | 1 |
| 5038 | GRM7    | ENST00000467425 | p.V343M  | c.1027      | 0.061213769 | 4.03  | 1 |

|              |                 |                    |           |             |       |   |
|--------------|-----------------|--------------------|-----------|-------------|-------|---|
| 5038 GRM7    | ENST00000467425 | p.Q409K            | c.1225    | 0.072549333 | 0     | 1 |
| 5038 GRM7    | ENST00000467425 | p.G459C            | c.1375    | 0.011335564 | 6.463 | 1 |
| 5039 ARHGDI  | ENST00000583868 | p.S124F            | c.371     | 0.049446081 | 4.338 | 1 |
| 5039 ARHGDI  | ENST00000583868 | p.T148in_frame_del | c.443_441 | 0.049446081 | 0     | 1 |
| 5040 SI      | ENST00000264382 | p.T211I            | c.632     | 0.02910592  | 5.183 | 1 |
| 5040 SI      | ENST00000264382 | p.R232H            | c.695     | 0.084879661 | 0     | 1 |
| 5040 SI      | ENST00000264382 | p.I311V            | c.931     | 0.058931244 | 4.124 | 1 |
| 5041 SKP2    | ENST00000274255 | p.H199N            | c.595     | 0.147265435 | 9.489 | 1 |
| 5041 SKP2    | ENST00000274255 | p.G200C            | c.598     | 2.011117218 | 0     | 1 |
| 5041 SKP2    | ENST00000274255 | p.G200D            | c.599     | 2.011117218 | 0     | 2 |
| 5041 SKP2    | ENST00000274255 | p.T225I            | c.674     | 0.17226726  | 6.684 | 1 |
| 5042 CFH     | ENST00000367429 | p.D1119N           | c.3355    | 0.013897797 | 6.169 | 1 |
| 5042 CFH     | ENST00000367429 | p.P1161S           | c.3481    | 0.013897797 | 0     | 1 |
| 5043 LYPLAL1 | ENST00000366928 | p.R117M            | c.350     | 0.129767409 | 2.946 | 1 |
| 5043 LYPLAL1 | ENST00000366928 | p.S21I             | c.62      | 0.129767409 | 0     | 1 |
| 5044 NR1I2   | ENST00000337940 | p.L387I            | c.1159    | 0.010373165 | 0     | 1 |
| 5044 NR1I2   | ENST00000337940 | p.G317R            | c.949     | 0.010373165 | 6.591 | 1 |
| 5045 ICAM2   | ENST00000579687 | p.L142M            | c.424     | 0.160171711 | 0     | 1 |
| 5045 ICAM2   | ENST00000579687 | p.P166T            | c.496     | 0.12397297  | 3.07  | 1 |
| 5045 ICAM2   | ENST00000579687 | p.P168L            | c.503     | 0.045985182 | 4.605 | 1 |
| 5046 PNLIP   | ENST00000369221 | p.T87A             | c.259     | 1.055283777 | 0     | 1 |
| 5046 PNLIP   | ENST00000369221 | p.T87I             | c.260     | 1.055283777 | 0     | 1 |
| 5046 PNLIP   | ENST00000369221 | p.A328T            | c.982     | 0.110567554 | 4.177 | 1 |
| 5047 PDGFRB  | ENST00000261799 | p.A719V            | c.2156    | 0.021065121 | 5.569 | 1 |
| 5047 PDGFRB  | ENST00000261799 | p.Y778C            | c.2333    | 0.021065121 | 0     | 1 |
| 5048 PPP2R1A | ENST00000322088 | p.M291K            | c.872     | 0.117603263 | 0     | 1 |
| 5048 PPP2R1A | ENST00000322088 | p.C329F            | c.986     | 0.117603263 | 3.088 | 1 |
| 5049 AKR1C3  | ENST00000380554 | p.R91Q             | c.272     | 0.018440224 | 5.761 | 1 |
| 5049 AKR1C3  | ENST00000380554 | p.A150V            | c.449     | 0.018440224 | 0     | 1 |
| 5050 TFRC    | ENST00000360110 | p.L381M            | c.1141    | 0.01167851  | 0     | 1 |
| 5050 TFRC    | ENST00000360110 | p.P308L            | c.923     | 0.01167851  | 6.42  | 1 |
| 5051 ZAP70   | ENST00000264972 | p.V366M            | c.1096    | 0.084260483 | 0     | 1 |
| 5051 ZAP70   | ENST00000264972 | p.V413I            | c.1237    | 0.084260483 | 3.569 | 1 |
| 5052 ASS1    | ENST00000372394 | p.Q125R            | c.374     | 0.112578247 | 0     | 1 |
| 5052 ASS1    | ENST00000372394 | p.R146K            | c.437     | 0.112578247 | 3.151 | 1 |
| 5053 CYP3A4  | ENST00000336411 | p.P368S            | c.1102    | 0.016187231 | 5.949 | 1 |
| 5053 CYP3A4  | ENST00000336411 | p.R403H            | c.1208    | 0.016187231 | 0     | 1 |
| 5054 MME     | ENST00000360490 | p.Q561H            | c.1683    | 0.044842173 | 0     | 1 |
| 5054 MME     | ENST00000360490 | p.L674V            | c.2020    | 0.044842173 | 4.479 | 1 |
| 5055 TP73    | ENST00000378295 | p.L148F            | c.444     | 0.007193951 | 0     | 1 |
| 5055 TP73    | ENST00000378295 | p.S289F            | c.866     | 0.007193951 | 7.119 | 1 |
| 5056 TRIM33  | ENST00000358465 | p.R968H            | c.2903    | 0.018879966 | 0     | 1 |
| 5056 TRIM33  | ENST00000358465 | p.E1079D           | c.3237    | 0.018879966 | 5.727 | 1 |
| 5057 HMBOX1  | ENST00000524238 | p.C278Y            | c.833     | 0.010194961 | 0     | 1 |
| 5057 HMBOX1  | ENST00000524238 | p.A303V            | c.908     | 0.010194961 | 6.616 | 1 |
| 5058 TUBG1   | ENST00000251413 | p.R372Q            | c.1115    | 0.027374947 | 0     | 1 |
| 5058 TUBG1   | ENST00000251413 | p.R296Q            | c.887     | 0.027374947 | 5.191 | 1 |
| 5059 OPRK1   | ENST00000265572 | p.H162Y            | c.484     | 0.299992846 | 2.737 | 1 |
| 5059 OPRK1   | ENST00000265572 | p.R252H            | c.755     | 1.149996423 | 0     | 2 |

|               |                 |          |             |             |       |   |
|---------------|-----------------|----------|-------------|-------------|-------|---|
| 5060 CFH      | ENST00000367429 | p.E570K  | c.1708      | 0.050555084 | 0     | 1 |
| 5060 CFH      | ENST00000367429 | p.G615R  | c.1843      | 0.050555084 | 4.306 | 1 |
| 5061 SAP18    | ENST00000382533 | p.G103D  | c.308       | 0.164253953 | 2.606 | 1 |
| 5061 SAP18    | ENST00000382533 | p.S130Y  | c.389       | 0.164253953 | 0     | 1 |
| 5062 RYR2     | ENST00000360064 | p.S451R  | c.1351      | 0.024245806 | 5.469 | 1 |
| 5062 RYR2     | ENST00000360064 | p.L454M  | c.1360      | 0.077424583 | 3.758 | 1 |
| 5062 RYR2     | ENST00000360064 | p.Q455H  | c.1365      | 0.026753641 | 5.327 | 1 |
| 5062 RYR2     | ENST00000360064 | p.S530F  | c.1589      | 0.12140374  | 0     | 1 |
| 5063 ADARB1   | ENST00000496664 | p.R514C  | c.1540      | 0.006447699 | 0     | 1 |
| 5063 ADARB1   | ENST00000496664 | p.S685F  | c.2054      | 0.006447699 | 7.277 | 1 |
| 5064 ARHGEF1  | ENST00000599846 | p.R191Q  | c.572       | 0.020531744 | 0     | 1 |
| 5064 ARHGEF1  | ENST00000599846 | p.R232Q  | c.695       | 0.020531744 | 5.606 | 1 |
| 5065 CYP1A2   | ENST00000343932 | p.M448I  | c.1344      | 0.051617354 | 0     | 1 |
| 5065 CYP1A2   | ENST00000343932 | p.A97T   | c.289       | 0.051617354 | 4.276 | 1 |
| 5066 CAMK1D   | ENST00000378847 | p.Q308E  | c.922       | 0.01594226  | 6.971 | 1 |
| 5066 CAMK1D   | ENST00000378847 | p.G32L   | c.94_95     | 1.00797113  | 0     | 1 |
| 5066 CAMK1D   | ENST00000378847 | p.G32E   | c.95        | 1.00797113  | 0     | 1 |
| 5067 PDCD4    | ENST00000280154 | p.A347S  | c.1039      | 0.006189334 | 7.336 | 1 |
| 5067 PDCD4    | ENST00000280154 | p.R256S  | c.768       | 0.013210859 | 0     | 1 |
| 5067 PDCD4    | ENST00000280154 | p.Q290H  | c.870       | 0.007021524 | 7.154 | 1 |
| 5069 ROBO2    | ENST00000332191 | p.A435V  | c.1304      | 0.128781744 | 0     | 1 |
| 5069 ROBO2    | ENST00000332191 | p.L473P  | c.1418      | 0.128781744 | 2.957 | 1 |
| 5070 AGO2     | ENST00000220592 | p.P590L  | c.1770_1769 | 0.015909144 | 5.974 | 1 |
| 5070 AGO2     | ENST00000220592 | p.T657M  | c.1970      | 0.015909144 | 0     | 1 |
| 5071 ASS1     | ENST00000372394 | p.P198S  | c.592       | 0.084260483 | 0     | 1 |
| 5071 ASS1     | ENST00000372394 | p.R279P  | c.836       | 0.084260483 | 3.569 | 1 |
| 5073 ATIC     | ENST00000236959 | p.R379Q  | c.1136      | 2.007976657 | 0     | 3 |
| 5073 ATIC     | ENST00000236959 | p.Q218K  | c.652       | 0.023929972 | 6.97  | 1 |
| 5074 HPGD     | ENST00000296522 | p.A166V  | c.497       | 0.100133735 | 0     | 1 |
| 5074 HPGD     | ENST00000296522 | p.G240C  | c.718       | 0.100133735 | 3.32  | 1 |
| 5075 IL23A    | ENST00000228534 | p.A47V   | c.140       | 0.025541729 | 0     | 1 |
| 5075 IL23A    | ENST00000228534 | p.S119N  | c.356       | 0.025541729 | 5.291 | 1 |
| 5077 TAF1L    | ENST00000242310 | p.D1522Y | c.4564      | 0.059829466 | 4.063 | 1 |
| 5077 TAF1L    | ENST00000242310 | p.D1636N | c.4906      | 0.059829466 | 0     | 1 |
| 5078 ITGAV    | ENST00000261023 | p.M430I  | c.1290      | 0.11931687  | 3.203 | 1 |
| 5078 ITGAV    | ENST00000261023 | p.Y48N   | c.142       | 0.207347937 | 0     | 1 |
| 5078 ITGAV    | ENST00000261023 | p.P71S   | c.211       | 0.109479261 | 3.34  | 1 |
| 5079 SERPINA3 | ENST00000467132 | p.D342G  | c.1025      | 0.154856087 | 0     | 1 |
| 5079 SERPINA3 | ENST00000467132 | p.H92R   | c.275       | 0.154856087 | 2.691 | 1 |
| 5080 P2RY1    | ENST00000305097 | p.M279I  | c.837       | 0.067498535 | 0     | 1 |
| 5080 P2RY1    | ENST00000305097 | p.T305R  | c.914       | 0.067498535 | 3.889 | 1 |
| 5081 BRD3     | ENST00000303407 | p.R34H   | c.101       | 0.173258736 | 2.529 | 1 |
| 5081 BRD3     | ENST00000303407 | p.N93Y   | c.277       | 0.173258736 | 0     | 1 |
| 5082 DCC      | ENST00000442544 | p.V883I  | c.2647      | 0.099787298 | 0     | 1 |
| 5082 DCC      | ENST00000442544 | p.F918L  | c.2754      | 0.099787298 | 3.325 | 1 |
| 5083 CMTR1    | ENST00000373451 | p.R532Q  | c.1595      | 0.026332713 | 0     | 1 |
| 5083 CMTR1    | ENST00000373451 | p.R228G  | c.682       | 0.026332713 | 5.247 | 1 |
| 5084 CCKAR    | ENST00000295589 | p.S36F   | c.107       | 0.098413497 | 3.345 | 1 |
| 5084 CCKAR    | ENST00000295589 | p.V9L    | c.25        | 0.098413497 | 0     | 1 |

|              |                 |          |        |             |       |   |
|--------------|-----------------|----------|--------|-------------|-------|---|
| 5085 RACGAP1 | ENST00000547905 | p.H368L  | c.1103 | 0.076893209 | 3.701 | 1 |
| 5085 RACGAP1 | ENST00000547905 | p.L409V  | c.1225 | 0.076893209 | 0     | 1 |
| 5086 NFKB1   | ENST00000226574 | p.A837V  | c.2510 | 0.007520269 | 7.055 | 1 |
| 5086 NFKB1   | ENST00000226574 | p.M860I  | c.2580 | 0.007520269 | 0     | 1 |
| 5087 FOLH1   | ENST00000256999 | p.V358M  | c.1072 | 0.098073012 | 3.35  | 1 |
| 5087 FOLH1   | ENST00000256999 | p.F418I  | c.1252 | 0.098073012 | 0     | 1 |
| 5088 TRNT1   | ENST00000251607 | p.L269S  | c.806  | 0.001503979 | 0     | 1 |
| 5088 TRNT1   | ENST00000251607 | p.D304N  | c.910  | 0.001503979 | 9.377 | 1 |
| 5089 C3      | ENST00000245907 | p.R710G  | c.2128 | 1.0217476   | 0     | 1 |
| 5089 C3      | ENST00000245907 | p.R710Q  | c.2129 | 1.0217476   | 0     | 1 |
| 5089 C3      | ENST00000245907 | p.R1427K | c.4280 | 1.0217476   | 6.523 | 2 |
| 5090 SMTN    | ENST00000358743 | p.R857H  | c.2570 | 0.142299254 | 0     | 1 |
| 5090 SMTN    | ENST00000358743 | p.V902E  | c.2705 | 0.142299254 | 2.813 | 1 |
| 5091 HEXB    | ENST00000261416 | p.G418R  | c.1252 | 0.079466201 | 3.672 | 1 |
| 5091 HEXB    | ENST00000261416 | p.P442S  | c.1324 | 0.091349896 | 0     | 1 |
| 5091 HEXB    | ENST00000261416 | p.Q479R  | c.1436 | 0.013907099 | 6.277 | 1 |
| 5092 PNMT    | ENST00000269582 | p.P42L   | c.125  | 0.011686607 | 6.419 | 1 |
| 5092 PNMT    | ENST00000269582 | p.L262F  | c.784  | 0.011686607 | 0     | 1 |
| 5093 NEDD4   | ENST00000508342 | p.K1000R | c.2999 | 0.115502822 | 3.114 | 1 |
| 5093 NEDD4   | ENST00000508342 | p.M1082T | c.3245 | 0.115502822 | 0     | 1 |
| 5094 HMGCS1  | ENST00000325110 | p.T452M  | c.1355 | 0.03991293  | 5.647 | 1 |
| 5094 HMGCS1  | ENST00000325110 | p.S67A   | c.199  | 1.019956465 | 0     | 1 |
| 5094 HMGCS1  | ENST00000325110 | p.S67T   | c.199  | 1.019956465 | 0     | 1 |
| 5095 TNPO1   | ENST00000337273 | p.C285Y  | c.854  | 0.007796271 | 7.003 | 1 |
| 5095 TNPO1   | ENST00000337273 | p.L308S  | c.923  | 0.007796271 | 0     | 1 |
| 5096 IL7     | ENST00000263851 | p.E77K   | c.229  | 0.288171587 | 0     | 1 |
| 5096 IL7     | ENST00000263851 | p.K136N  | c.408  | 0.288171587 | 1.795 | 1 |
| 5097 TEK     | ENST00000380036 | p.L819P  | c.2456 | 0.018879966 | 6.727 | 1 |
| 5097 TEK     | ENST00000380036 | p.R842C  | c.2524 | 1.009439983 | 0     | 2 |
| 5098 ASH2L   | ENST00000343823 | p.R417W  | c.1249 | 1.016288528 | 0     | 2 |
| 5098 ASH2L   | ENST00000343823 | p.P493H  | c.1478 | 0.032577055 | 5.94  | 1 |
| 5100 UPF1    | ENST00000599848 | p.V134M  | c.400  | 0.011414409 | 0     | 1 |
| 5100 UPF1    | ENST00000599848 | p.P246L  | c.737  | 0.011414409 | 6.453 | 1 |
| 5101 PTPRS   | ENST00000372412 | p.R1493Q | c.4478 | 0.12771501  | 0     | 1 |
| 5101 PTPRS   | ENST00000372412 | p.T1554M | c.4661 | 0.12771501  | 2.969 | 1 |
| 5102 EPHA5   | ENST00000273854 | p.R135W  | c.403  | 0.041463911 | 4.592 | 1 |
| 5102 EPHA5   | ENST00000273854 | p.R191S  | c.571  | 0.041463911 | 0     | 1 |
| 5104 DICER1  | ENST00000343455 | p.E1705K | c.5113 | 2.088554631 | 0     | 1 |
| 5104 DICER1  | ENST00000343455 | p.E1705Q | c.5113 | 2.088554631 | 0     | 1 |
| 5104 DICER1  | ENST00000343455 | p.E1705A | c.5114 | 2.088554631 | 0     | 1 |
| 5104 DICER1  | ENST00000343455 | p.D1709N | c.5125 | 1.078102236 | 7.653 | 2 |
| 5104 DICER1  | ENST00000343455 | p.M1821I | c.5463 | 0.362247442 | 3.669 | 1 |
| 5105 STARD13 | ENST00000336934 | p.P963H  | c.2888 | 0.01127288  | 0     | 1 |
| 5105 STARD13 | ENST00000336934 | p.T1020A | c.3058 | 0.01127288  | 6.471 | 1 |
| 5106 UCHL1   | ENST00000284440 | p.E74K   | c.220  | 0.15442733  | 0     | 1 |
| 5106 UCHL1   | ENST00000284440 | p.N184S  | c.551  | 0.15442733  | 2.695 | 1 |
| 5107 ECE1    | ENST00000374893 | p.F405V  | c.1213 | 0.011390698 | 0     | 1 |
| 5107 ECE1    | ENST00000374893 | p.E532K  | c.1594 | 0.011390698 | 6.456 | 1 |
| 5108 CAPG    | ENST00000263867 | p.R153W  | c.457  | 0.014248956 | 0     | 1 |

|      |         |                 |         |        |             |       |   |
|------|---------|-----------------|---------|--------|-------------|-------|---|
| 5108 | CAPG    | ENST00000263867 | p.D268N | c.802  | 0.014248956 | 6.133 | 1 |
| 5109 | PITRM1  | ENST00000380989 | p.V110I | c.328  | 0.063990431 | 0     | 1 |
| 5109 | PITRM1  | ENST00000380989 | p.H254Y | c.760  | 0.063990431 | 3.966 | 1 |
| 5110 | POLK    | ENST00000241436 | p.L383F | c.1147 | 0.00709491  | 7.139 | 1 |
| 5110 | POLK    | ENST00000241436 | p.A82S  | c.244  | 0.00709491  | 0     | 1 |
| 5111 | ALDH5A1 | ENST00000348925 | p.M377I | c.1131 | 0.026042288 | 0     | 1 |
| 5111 | ALDH5A1 | ENST00000348925 | p.P455S | c.1363 | 0.026042288 | 5.263 | 1 |
| 5112 | ENPEP   | ENST00000265162 | p.R887G | c.2659 | 1.080772052 | 0     | 1 |
| 5112 | ENPEP   | ENST00000265162 | p.R887I | c.2660 | 1.080772052 | 0     | 1 |
| 5112 | ENPEP   | ENST00000265162 | p.P224L | c.671  | 0.161544104 | 3.63  | 1 |
| 5113 | GALK2   | ENST00000560031 | p.T400A | c.1198 | 0.087656203 | 0     | 1 |
| 5113 | GALK2   | ENST00000560031 | p.E49K  | c.145  | 0.087656203 | 3.512 | 1 |
| 5114 | LYN     | ENST00000519728 | p.D66Y  | c.196  | 0.21538654  | 2.215 | 1 |
| 5114 | LYN     | ENST00000519728 | p.M90I  | c.270  | 0.21538654  | 0     | 1 |
| 5115 | PON1    | ENST00000542556 | p.E92K  | c.274  | 0.177759676 | 2.492 | 1 |
| 5116 | HEBP2   | ENST00000607197 | p.D170N | c.508  | 0.037655385 | 4.731 | 1 |
| 5116 | HEBP2   | ENST00000607197 | p.Q196P | c.587  | 0.037655385 | 0     | 1 |
| 5117 | DPP4    | ENST00000360534 | p.A306T | c.916  | 0.026979361 | 0     | 1 |
| 5117 | DPP4    | ENST00000360534 | p.I327T | c.980  | 0.026979361 | 5.212 | 1 |
| 5118 | DCTD    | ENST00000357067 | p.D43G  | c.128  | 0.094041484 | 0     | 1 |
| 5118 | DCTD    | ENST00000357067 | p.W78C  | c.234  | 0.089498046 | 3.482 | 1 |
| 5118 | DCTD    | ENST00000357067 | p.D21N  | c.61   | 0.004543438 | 7.782 | 1 |
| 5119 | IL6R    | ENST00000368485 | p.P136L | c.407  | 0.020081349 | 6.638 | 1 |
| 5119 | IL6R    | ENST00000368485 | p.V194I | c.580  | 1.010040675 | 0     | 2 |
| 5120 | TP53BP2 | ENST00000343537 | p.C34Y  | c.101  | 0.06421259  | 0     | 1 |
| 5120 | TP53BP2 | ENST00000343537 | p.R67Q  | c.200  | 0.06421259  | 3.961 | 1 |
| 5121 | PREP    | ENST00000369110 | p.R245C | c.733  | 1.016288528 | 0     | 1 |
| 5121 | PREP    | ENST00000369110 | p.R245H | c.734  | 1.016288528 | 0     | 1 |
| 5121 | PREP    | ENST00000369110 | p.T298M | c.893  | 0.032577055 | 5.94  | 1 |
| 5122 | RB1     | ENST00000267163 | p.A488V | c.1463 | 0.008644511 | 6.854 | 1 |
| 5122 | RB1     | ENST00000267163 | p.L550I | c.1648 | 0.008644511 | 0     | 1 |
| 5123 | GHR     | ENST00000230882 | p.Q83R  | c.248  | 0.059005776 | 0     | 1 |
| 5123 | GHR     | ENST00000230882 | p.G133S | c.397  | 0.059005776 | 4.083 | 1 |
| 5124 | ITSN2   | ENST00000355123 | p.L759S | c.2276 | 0.468460723 | 2.094 | 1 |
| 5124 | ITSN2   | ENST00000355123 | p.D787N | c.2359 | 1.234230362 | 0     | 1 |
| 5124 | ITSN2   | ENST00000355123 | p.D787V | c.2360 | 1.234230362 | 0     | 1 |
| 5125 | AGO1    | ENST00000373204 | p.R712H | c.2135 | 0.15346696  | 0     | 1 |
| 5125 | AGO1    | ENST00000373204 | p.D216G | c.647  | 0.15346696  | 2.704 | 1 |
| 5126 | ERBB2   | ENST00000269571 | p.V94I  | c.280  | 0.011957006 | 6.386 | 1 |
| 5126 | ERBB2   | ENST00000269571 | p.R138W | c.412  | 0.011957006 | 0     | 1 |
| 5127 | SKA2    | ENST00000330137 | p.S76T  | c.227  | 0.002773647 | 8.494 | 1 |
| 5127 | SKA2    | ENST00000330137 | p.R77H  | c.230  | 0.013415085 | 6.22  | 1 |
| 5127 | SKA2    | ENST00000330137 | p.K115R | c.344  | 0.016188732 | 0     | 1 |
| 5128 | GMPR    | ENST00000259727 | p.E136V | c.407  | 0.043980262 | 4.507 | 1 |
| 5128 | GMPR    | ENST00000259727 | p.E167Q | c.499  | 0.043980262 | 0     | 1 |
| 5129 | NUMBL   | ENST00000598779 | p.R53W  | c.157  | 0.048260946 | 4.373 | 1 |
| 5129 | NUMBL   | ENST00000598779 | p.R10L  | c.29   | 0.048260946 | 0     | 1 |
| 5130 | BIRC2   | ENST00000227758 | p.F335L | c.1005 | 1.230046913 | 0     | 2 |
| 5130 | BIRC2   | ENST00000227758 | p.V298M | c.892  | 0.460093825 | 2.12  | 1 |

|              |                 |         |        |             |       |   |
|--------------|-----------------|---------|--------|-------------|-------|---|
| 5131 GSS     | ENST00000216951 | p.Q366H | c.1098 | 0.025453361 | 0     | 1 |
| 5131 GSS     | ENST00000216951 | p.A393T | c.1177 | 0.025453361 | 5.296 | 1 |
| 5132 AQP2    | ENST00000199280 | p.G100R | c.298  | 0.035018732 | 6.588 | 1 |
| 5132 AQP2    | ENST00000199280 | p.V194I | c.580  | 1.010394758 | 0     | 2 |
| 5133 FASLG   | ENST00000367721 | p.E161K | c.481  | 0.007259068 | 7.106 | 1 |
| 5133 FASLG   | ENST00000367721 | p.E163K | c.487  | 0.004534    | 7.785 | 1 |
| 5133 FASLG   | ENST00000367721 | p.T274A | c.820  | 0.011793067 | 0     | 1 |
| 5134 CRABP2  | ENST00000368222 | p.R12Q  | c.35   | 0.115502822 | 3.114 | 1 |
| 5134 CRABP2  | ENST00000368222 | p.E119K | c.355  | 0.115502822 | 0     | 1 |
| 5135 CAMKMT  | ENST00000378494 | p.R211Q | c.632  | 0.07139664  | 0     | 1 |
| 5135 CAMKMT  | ENST00000378494 | p.Y239C | c.716  | 0.07139664  | 3.808 | 1 |
| 5136 NXT1    | ENST00000254998 | p.L92F  | c.274  | 0.076680311 | 0     | 1 |
| 5136 NXT1    | ENST00000254998 | p.F113L | c.339  | 0.076680311 | 3.705 | 1 |
| 5137 CLEC4D  | ENST00000299665 | p.R137K | c.410  | 0.009752582 | 6.68  | 1 |
| 5137 CLEC4D  | ENST00000299665 | p.K191E | c.571  | 0.009752582 | 0     | 1 |
| 5138 RAB5A   | ENST00000273047 | p.S34L  | c.101  | 0.011866185 | 6.397 | 1 |
| 5138 RAB5A   | ENST00000273047 | p.G78R  | c.232  | 0.011866185 | 0     | 1 |
| 5139 P2RY12  | ENST00000302632 | p.G90R  | c.268  | 0.042777619 | 4.547 | 1 |
| 5139 P2RY12  | ENST00000302632 | p.R168K | c.503  | 0.042777619 | 0     | 1 |
| 5140 FBP2    | ENST00000375337 | p.I139M | c.417  | 0.016333752 | 5.936 | 1 |
| 5140 FBP2    | ENST00000375337 | p.L176F | c.526  | 0.016333752 | 0     | 1 |
| 5141 NPR3    | ENST00000265074 | p.A426S | c.1276 | 0.029137078 | 6.101 | 1 |
| 5141 NPR3    | ENST00000265074 | p.D299N | c.895  | 1.014568539 | 0     | 1 |
| 5141 NPR3    | ENST00000265074 | p.D299Y | c.895  | 1.014568539 | 0     | 1 |
| 5142 VRK1    | ENST00000216639 | p.K356E | c.1066 | 1.869234689 | 0     | 1 |
| 5142 VRK1    | ENST00000216639 | p.K356N | c.1068 | 1.869234689 | 0     | 1 |
| 5142 VRK1    | ENST00000216639 | p.Y198C | c.593  | 0.017072701 | 8.681 | 1 |
| 5142 VRK1    | ENST00000216639 | p.R203W | c.607  | 1.545008427 | 2.148 | 1 |
| 5142 VRK1    | ENST00000216639 | p.R203Q | c.608  | 1.545008427 | 2.148 | 1 |
| 5142 VRK1    | ENST00000216639 | p.R219I | c.656  | 1.28608519  | 3.212 | 2 |
| 5142 VRK1    | ENST00000216639 | p.D222N | c.664  | 0.54485133  | 2.324 | 1 |
| 5143 VTA1    | ENST00000367630 | p.K62R  | c.185  | 0.350624813 | 2.512 | 1 |
| 5143 VTA1    | ENST00000367630 | p.P8S   | c.22   | 1.175312406 | 0     | 1 |
| 5143 VTA1    | ENST00000367630 | p.P8H   | c.23   | 1.175312406 | 0     | 1 |
| 5144 PDIA5   | ENST00000316218 | p.V51A  | c.152  | 0.093234002 | 3.423 | 1 |
| 5144 PDIA5   | ENST00000316218 | p.C81F  | c.242  | 0.093234002 | 0     | 1 |
| 5145 ADAM8   | ENST00000445355 | p.H232L | c.695  | 0.066569263 | 3.909 | 1 |
| 5145 ADAM8   | ENST00000445355 | p.V326M | c.976  | 0.066569263 | 0     | 1 |
| 5146 ATXN3   | ENST00000545170 | p.T60M  | c.179  | 0.091505356 | 3.45  | 1 |
| 5146 ATXN3   | ENST00000545170 | p.S96G  | c.286  | 0.091505356 | 0     | 1 |
| 5147 CYP2A13 | ENST00000330436 | p.L395M | c.1183 | 1.006510572 | 0     | 2 |
| 5147 CYP2A13 | ENST00000330436 | p.H84Y  | c.250  | 0.013021144 | 7.263 | 1 |
| 5148 CDK4    | ENST00000257904 | p.R139Q | c.416  | 0.010026765 | 6.64  | 1 |
| 5148 CDK4    | ENST00000257904 | p.Q168E | c.502  | 0.010026765 | 0     | 1 |
| 5149 KHK     | ENST00000260599 | p.L208F | c.624  | 0.190518104 | 3.392 | 1 |
| 5149 KHK     | ENST00000260599 | p.A232S | c.694  | 1.095259052 | 0     | 2 |
| 5150 IL10RA  | ENST00000227752 | p.H41Y  | c.121  | 0.012886462 | 6.278 | 1 |
| 5150 IL10RA  | ENST00000227752 | p.V86M  | c.256  | 0.012886462 | 0     | 1 |
| 5151 PKN2    | ENST00000370521 | p.E822G | c.2465 | 0.069108166 | 3.855 | 1 |

|              |                 |          |        |             |       |   |
|--------------|-----------------|----------|--------|-------------|-------|---|
| 5151 PKN2    | ENST00000370521 | p.V845M  | c.2533 | 0.069108166 | 0     | 1 |
| 5153 PRSS1   | ENST00000486171 | p.S67L   | c.200  | 0.118311048 | 0     | 1 |
| 5153 PRSS1   | ENST00000486171 | p.P111S  | c.331  | 0.026582665 | 5.363 | 1 |
| 5153 PRSS1   | ENST00000486171 | p.Q112K  | c.334  | 0.096297085 | 3.411 | 1 |
| 5154 ASB9    | ENST00000380488 | p.K163E  | c.487  | 0.150935074 | 0     | 1 |
| 5154 ASB9    | ENST00000380488 | p.G198D  | c.593  | 0.150935074 | 2.728 | 1 |
| 5155 YWHAQ   | ENST00000238081 | p.I166M  | c.498  | 0.025970183 | 0     | 1 |
| 5155 YWHAQ   | ENST00000238081 | p.I217S  | c.650  | 0.025970183 | 5.267 | 1 |
| 5156 RAP1B   | ENST00000250559 | p.M72V   | c.214  | 0.013763584 | 0     | 1 |
| 5156 RAP1B   | ENST00000250559 | p.R102Q  | c.305  | 0.013763584 | 6.183 | 1 |
| 5157 GSS     | ENST00000216951 | p.R252Q  | c.755  | 0.093687475 | 3.416 | 1 |
| 5157 GSS     | ENST00000216951 | p.S289L  | c.866  | 0.093687475 | 0     | 1 |
| 5158 IQGAP1  | ENST00000268182 | p.I1041L | c.3121 | 0.062025273 | 4.011 | 1 |
| 5158 IQGAP1  | ENST00000268182 | p.A1178V | c.3533 | 0.062025273 | 0     | 1 |
| 5159 L3MBTL1 | ENST00000427442 | p.K522N  | c.1566 | 0.252088114 | 2.988 | 1 |
| 5159 L3MBTL1 | ENST00000427442 | p.A564T  | c.1690 | 1.126044057 | 0     | 2 |
| 5160 COMP    | ENST00000222271 | p.R665Q  | c.1994 | 0.012499377 | 6.322 | 1 |
| 5160 COMP    | ENST00000222271 | p.M717I  | c.2151 | 0.012499377 | 0     | 1 |
| 5161 F5      | ENST00000367796 | p.S2091L | c.6272 | 1.14252067  | 0     | 2 |
| 5161 F5      | ENST00000367796 | p.K2093N | c.6279 | 0.101311448 | 6.563 | 1 |
| 5161 F5      | ENST00000367796 | p.K2120R | c.6359 | 0.344046967 | 2.922 | 1 |
| 5162 DLG2    | ENST00000543673 | p.L351P  | c.1052 | 0.050032176 | 0     | 1 |
| 5162 DLG2    | ENST00000543673 | p.V296I  | c.886  | 0.050032176 | 4.321 | 1 |
| 5164 PTK2B   | ENST00000544172 | p.R643W  | c.1927 | 0.073099229 | 0     | 1 |
| 5164 PTK2B   | ENST00000544172 | p.Y664C  | c.1991 | 0.073099229 | 3.774 | 1 |
| 5165 TBX5    | ENST00000405440 | p.M83L   | c.247  | 0.026791112 | 9.454 | 1 |
| 5165 TBX5    | ENST00000405440 | p.L102I  | c.304  | 0.088435374 | 0     | 1 |
| 5165 TBX5    | ENST00000405440 | p.F155L  | c.465  | 0.083307658 | 4.153 | 1 |
| 5165 TBX5    | ENST00000405440 | p.V186M  | c.556  | 0.032529631 | 5.021 | 1 |
| 5166 DARS2   | ENST00000361951 | p.L404I  | c.1210 | 0.009881871 | 6.661 | 1 |
| 5166 DARS2   | ENST00000361951 | p.R428G  | c.1282 | 0.009881871 | 0     | 1 |
| 5167 DCC     | ENST00000442544 | p.Y916H  | c.2746 | 0.156041319 | 0     | 1 |
| 5167 DCC     | ENST00000442544 | p.T939M  | c.2816 | 0.156041319 | 2.68  | 1 |
| 5168 LGALS8  | ENST00000526589 | p.V245I  | c.733  | 0.167937928 | 2.574 | 1 |
| 5168 LGALS8  | ENST00000526589 | p.M311V  | c.931  | 0.167937928 | 0     | 1 |
| 5169 RFC5    | ENST00000454402 | p.E143D  | c.429  | 0.112344391 | 0     | 1 |
| 5169 RFC5    | ENST00000454402 | p.Q166H  | c.498  | 0.112344391 | 3.154 | 1 |
| 5170 HPN     | ENST00000392226 | p.S362N  | c.1085 | 0.189990607 | 2.396 | 1 |
| 5170 HPN     | ENST00000392226 | p.N323D  | c.967  | 0.189990607 | 0     | 1 |
| 5171 MAPK9   | ENST00000343111 | p.A348V  | c.1043 | 0.006070369 | 0     | 1 |
| 5171 MAPK9   | ENST00000343111 | p.N63K   | c.189  | 0.006070369 | 7.364 | 1 |
| 5172 POR     | ENST00000447222 | p.A479V  | c.1436 | 0.038287042 | 4.707 | 1 |
| 5173 MLST8   | ENST00000564088 | p.R36Q   | c.107  | 0.073302184 | 3.77  | 1 |
| 5173 MLST8   | ENST00000564088 | p.N73T   | c.218  | 0.073302184 | 0     | 1 |
| 5174 GM2A    | ENST00000357164 | p.V74I   | c.220  | 0.077481731 | 0     | 1 |
| 5174 GM2A    | ENST00000357164 | p.P120S  | c.358  | 0.077481731 | 3.69  | 1 |
| 5175 TOP1    | ENST00000361337 | p.K456N  | c.1368 | 0.061767853 | 0     | 1 |
| 5175 TOP1    | ENST00000361337 | p.V588I  | c.1762 | 0.061767853 | 4.017 | 1 |
| 5176 CTNNA1  | ENST00000302763 | p.G566R  | c.1696 | 0.010474317 | 6.577 | 1 |

|             |                 |          |             |             |       |   |
|-------------|-----------------|----------|-------------|-------------|-------|---|
| 5176 CTNNA1 | ENST00000302763 | p.P855A  | c.2563      | 0.010474317 | 0     | 1 |
| 5177 KDM6B  | ENST00000254846 | p.G1360C | c.4078      | 0.009705377 | 0     | 1 |
| 5177 KDM6B  | ENST00000254846 | p.V1508I | c.4522      | 0.009705377 | 6.687 | 1 |
| 5178 RAB43  | ENST00000315150 | p.R89H   | c.266       | 0.011280697 | 6.47  | 1 |
| 5178 RAB43  | ENST00000315150 | p.G121C  | c.361_360   | 0.011280697 | 0     | 1 |
| 5179 GAS6   | ENST00000357389 | p.L464M  | c.1390      | 0.004337261 | 0     | 1 |
| 5179 GAS6   | ENST00000357389 | p.G496K  | c.1487_1486 | 0.004337261 | 7.849 | 1 |
| 5180 BPHL   | ENST00000380379 | p.I238T  | c.713       | 0.151249261 | 2.725 | 1 |
| 5180 BPHL   | ENST00000380379 | p.H265Y  | c.793       | 0.151249261 | 0     | 1 |
| 5181 THRB   | ENST00000280696 | p.R353W  | c.1057      | 1.022892201 | 0     | 1 |
| 5181 THRB   | ENST00000280696 | p.R353Q  | c.1058      | 1.022892201 | 0     | 1 |
| 5181 THRB   | ENST00000280696 | p.Q267H  | c.801       | 0.045784402 | 5.449 | 1 |
| 5182 SNX33  | ENST00000308527 | p.P229S  | c.685       | 0.002355093 | 8.73  | 1 |
| 5182 SNX33  | ENST00000308527 | p.P256R  | c.767       | 0.002355093 | 0     | 1 |
| 5183 PARP15 | ENST00000464300 | p.S439P  | c.1315      | 0.020876157 | 5.582 | 1 |
| 5183 PARP15 | ENST00000464300 | p.P277S  | c.829       | 0.020876157 | 0     | 1 |
| 5184 ANK1   | ENST00000396942 | p.R1139W | c.3415      | 1.008656503 | 0     | 1 |
| 5184 ANK1   | ENST00000396942 | p.R1139Q | c.3416      | 1.008656503 | 0     | 1 |
| 5184 ANK1   | ENST00000396942 | p.V1176I | c.3526      | 0.017313005 | 6.852 | 1 |
| 5185 STK3   | ENST00000523601 | p.E59D   | c.177       | 0.007976657 | 0     | 1 |
| 5185 STK3   | ENST00000523601 | p.A82T   | c.244       | 0.007976657 | 6.97  | 1 |
| 5186 VPS29  | ENST00000546588 | p.V183A  | c.548       | 0.006977858 | 7.163 | 1 |
| 5186 VPS29  | ENST00000546588 | p.E207K  | c.619       | 0.006977858 | 0     | 1 |
| 5187 B3GAT3 | ENST00000265471 | p.T198A  | c.592       | 0.138120561 | 2.856 | 1 |
| 5187 B3GAT3 | ENST00000265471 | p.T309I  | c.926       | 0.138120561 | 0     | 1 |
| 5188 UBA3   | ENST00000361055 | p.R37C   | c.109       | 0.009752582 | 0     | 1 |
| 5188 UBA3   | ENST00000361055 | p.L63V   | c.187       | 0.009752582 | 6.68  | 1 |
| 5189 FARSA  | ENST00000588025 | p.V396I  | c.1186      | 0.002116652 | 0     | 1 |
| 5189 FARSA  | ENST00000588025 | p.I292T  | c.875       | 0.002116652 | 8.884 | 1 |
| 5190 CRYBB2 | ENST00000398215 | p.V141M  | c.421       | 0.036308825 | 4.838 | 1 |
| 5190 CRYBB2 | ENST00000398215 | p.S142L  | c.425       | 0.039818429 | 4.7   | 1 |
| 5190 CRYBB2 | ENST00000398215 | p.D176N  | c.526       | 0.073436922 | 0     | 1 |
| 5191 PTGR1  | ENST00000309195 | p.K231N  | c.693       | 0.00647457  | 0     | 1 |
| 5191 PTGR1  | ENST00000309195 | p.R266C  | c.796       | 0.00647457  | 7.271 | 1 |
| 5192 HGD    | ENST00000283871 | p.R336K  | c.1007      | 0.125562599 | 0     | 1 |
| 5192 HGD    | ENST00000283871 | p.T369A  | c.1105      | 0.049273188 | 4.454 | 1 |
| 5192 HGD    | ENST00000283871 | p.P370L  | c.1109      | 0.083583786 | 3.645 | 1 |
| 5193 RBBP4  | ENST00000373493 | p.T37A   | c.109       | 0.029666941 | 5.075 | 1 |
| 5193 RBBP4  | ENST00000373493 | p.V401A  | c.1202      | 0.029666941 | 0     | 1 |
| 5194 PIR    | ENST00000380421 | p.K46E   | c.136       | 0.103736823 | 0     | 1 |
| 5194 PIR    | ENST00000380421 | p.H112D  | c.334       | 0.103736823 | 3.269 | 1 |
| 5195 PRPS1  | ENST00000543248 | p.W154L  | c.461       | 0.053437636 | 4.226 | 1 |
| 5195 PRPS1  | ENST00000543248 | p.I247F  | c.739       | 0.053437636 | 0     | 1 |
| 5196 EML1   | ENST00000334192 | p.D778N  | c.2332      | 0.023633875 | 6.403 | 1 |
| 5196 EML1   | ENST00000334192 | p.D291N  | c.871       | 0.017122059 | 6.868 | 1 |
| 5196 EML1   | ENST00000334192 | p.S314P  | c.940       | 1.020377967 | 0     | 1 |
| 5196 EML1   | ENST00000334192 | p.S314L  | c.941       | 1.020377967 | 0     | 1 |
| 5197 TBC1D1 | ENST00000261439 | p.G853V  | c.2558      | 0.010308656 | 6.6   | 1 |
| 5197 TBC1D1 | ENST00000261439 | p.Y874C  | c.2621      | 0.010308656 | 0     | 1 |



|                |                 |                            |           |             |       |   |
|----------------|-----------------|----------------------------|-----------|-------------|-------|---|
| 5198 ADCY10    | ENST00000367851 | p.I395V                    | c.1183    | 1.022561394 | 0     | 2 |
| 5198 ADCY10    | ENST00000367851 | p.Q283H                    | c.849     | 0.045122787 | 5.47  | 1 |
| 5199 EPHB1     | ENST00000398015 | p.M447I                    | c.1341    | 0.166200889 | 3.589 | 1 |
| 5199 EPHB1     | ENST00000398015 | p.R497W                    | c.1489    | 1.083100444 | 0     | 1 |
| 5199 EPHB1     | ENST00000398015 | p.R497Q                    | c.1490    | 1.083100444 | 0     | 1 |
| 5200 GBE1      | ENST00000429644 | p.F616S                    | c.1847    | 0.009929935 | 7.654 | 1 |
| 5200 GBE1      | ENST00000429644 | p.R679C                    | c.2035    | 1.004964968 | 0     | 1 |
| 5200 GBE1      | ENST00000429644 | p.R679H                    | c.2036    | 1.004964968 | 0     | 1 |
| 5201 ENO3      | ENST00000518175 | p.V344I                    | c.1030    | 0.028755864 | 0     | 1 |
| 5201 ENO3      | ENST00000518175 | p.P36A                     | c.106     | 0.028755864 | 5.12  | 1 |
| 5202 ITGA2     | ENST00000296585 | p.V176A                    | c.527     | 0.155936015 | 0     | 1 |
| 5202 ITGA2     | ENST00000296585 | p.G212V                    | c.635     | 0.133529542 | 3.306 | 1 |
| 5202 ITGA2     | ENST00000296585 | p.S240T                    | c.718     | 0.08724522  | 4.189 | 1 |
| 5203 ACVR2B    | ENST00000352511 | p.E111K                    | c.331     | 1.003980044 | 0     | 2 |
| 5203 ACVR2B    | ENST00000352511 | p.Y31F                     | c.92      | 0.007960087 | 7.973 | 1 |
| 5204 HIST1H2BA | ENST00000274764 | p.S93F                     | c.278     | 0.013212067 | 7.242 | 1 |
| 5204 HIST1H2BA | ENST00000274764 | p.TKAVTKYTS117in_frame_del | c.347_373 | 1.006606033 | 0     | 1 |
| 5204 HIST1H2BA | ENST00000274764 | p.T117A                    | c.349     | 1.006606033 | 0     | 1 |
| 5205 CEACAM5   | ENST00000221992 | p.N410K                    | c.1230    | 0.016676958 | 0     | 1 |
| 5205 CEACAM5   | ENST00000221992 | p.S332A                    | c.994     | 0.016676958 | 5.906 | 1 |
| 5206 TSTA3     | ENST00000425753 | p.T115I                    | c.344     | 0.008999122 | 6.796 | 1 |
| 5206 TSTA3     | ENST00000425753 | p.S144W                    | c.431     | 0.008999122 | 0     | 1 |
| 5207 BPIFA1    | ENST00000375413 | p.G49E                     | c.146     | 0.002895443 | 8.432 | 1 |
| 5207 BPIFA1    | ENST00000375413 | p.E117K                    | c.349     | 0.002895443 | 0     | 1 |
| 5208 SUL1A2    | ENST00000335715 | p.P87S                     | c.259     | 0.025016088 | 0     | 1 |
| 5208 SUL1A2    | ENST00000335715 | p.R244C                    | c.730_729 | 0.025016088 | 5.321 | 1 |
| 5209 RYR2      | ENST00000360064 | p.S402N                    | c.1205    | 0.153999759 | 2.699 | 1 |
| 5209 RYR2      | ENST00000360064 | p.L235V                    | c.703     | 0.153999759 | 0     | 1 |
| 5210 ACTN4     | ENST00000252699 | p.R65W                     | c.193     | 0.136407985 | 2.874 | 1 |
| 5210 ACTN4     | ENST00000252699 | p.D236N                    | c.706     | 0.136407985 | 0     | 1 |
| 5211 ACVR2B    | ENST00000352511 | p.A34T                     | c.100     | 0.020432365 | 0     | 1 |
| 5211 ACVR2B    | ENST00000352511 | p.E71K                     | c.211     | 0.020432365 | 5.613 | 1 |
| 5212 FGFR1     | ENST00000341462 | p.A171S                    | c.511     | 0.031995216 | 4.966 | 1 |
| 5212 FGFR1     | ENST00000341462 | p.R251W                    | c.751     | 0.031995216 | 0     | 1 |
| 5213 XDH       | ENST00000379416 | p.P363L                    | c.1088    | 0.039584081 | 0     | 1 |
| 5213 XDH       | ENST00000379416 | p.F418L                    | c.1254    | 0.024688791 | 5.34  | 1 |
| 5213 XDH       | ENST00000379416 | p.G437S                    | c.1309    | 0.01489529  | 6.069 | 1 |
| 5214 EGFR      | ENST00000275493 | p.T363I                    | c.1088    | 0.014219357 | 0     | 1 |
| 5214 EGFR      | ENST00000275493 | p.G331R                    | c.991     | 0.014219357 | 6.136 | 1 |
| 5215 UBA3      | ENST00000361055 | p.C249Y                    | c.746     | 0.020617311 | 0     | 1 |
| 5215 UBA3      | ENST00000361055 | p.S290L                    | c.869     | 0.020617311 | 5.6   | 1 |
| 5216 ERAP2     | ENST00000437043 | p.S432L                    | c.1295    | 0.008716713 | 6.842 | 1 |
| 5216 ERAP2     | ENST00000437043 | p.F931L                    | c.2791    | 0.008716713 | 0     | 1 |
| 5217 LRP6      | ENST00000261349 | p.R341H                    | c.1022    | 0.022390026 | 5.481 | 1 |
| 5217 LRP6      | ENST00000261349 | p.T312A                    | c.934     | 0.022390026 | 0     | 1 |
| 5218 PLA2G4A   | ENST00000367466 | p.P686S                    | c.2056    | 0.013859317 | 0     | 1 |
| 5218 PLA2G4A   | ENST00000367466 | p.M256I                    | c.768     | 0.013859317 | 6.173 | 1 |
| 5219 PIK3CG    | ENST00000496166 | p.V223I                    | c.667     | 0.038206516 | 6.295 | 1 |
| 5219 PIK3CG    | ENST00000496166 | p.V274I                    | c.820     | 2.012735505 | 0     | 3 |

|      |          |                 |          |           |             |       |   |
|------|----------|-----------------|----------|-----------|-------------|-------|---|
| 5220 | KSR2     | ENST00000339824 | p.D660N  | c.1978    | 0.005912566 | 0     | 1 |
| 5220 | KSR2     | ENST00000339824 | p.R718L  | c.2153    | 0.005912566 | 7.402 | 1 |
| 5221 | MME      | ENST00000360490 | p.E233K  | c.697     | 0.139951611 | 2.837 | 1 |
| 5221 | MME      | ENST00000360490 | p.E280K  | c.838     | 0.139951611 | 0     | 1 |
| 5222 | PIK3C3   | ENST00000262039 | p.V726I  | c.2176    | 0.020146117 | 0     | 1 |
| 5222 | PIK3C3   | ENST00000262039 | p.G786V  | c.2357    | 0.010216182 | 6.613 | 1 |
| 5222 | PIK3C3   | ENST00000262039 | p.C802Y  | c.2405    | 0.009929935 | 6.654 | 1 |
| 5223 | CR2      | ENST00000367057 | p.G932R  | c.2794    | 0.031995216 | 0     | 1 |
| 5223 | CR2      | ENST00000367057 | p.C953Y  | c.2858    | 0.031995216 | 4.966 | 1 |
| 5224 | KLRG1    | ENST00000266551 | p.E93K   | c.277     | 0.092718433 | 0     | 1 |
| 5224 | KLRG1    | ENST00000266551 | p.P179S  | c.535     | 0.092718433 | 3.431 | 1 |
| 5225 | A2M      | ENST00000318602 | p.Q1051H | c.3153    | 0.064390872 | 0     | 1 |
| 5225 | A2M      | ENST00000318602 | p.H1259R | c.3776    | 0.064390872 | 3.957 | 1 |
| 5226 | HSD17B11 | ENST00000358290 | p.F56C   | c.167     | 0.026042288 | 5.263 | 1 |
| 5226 | HSD17B11 | ENST00000358290 | p.A85V   | c.254     | 0.026042288 | 0     | 1 |
| 5227 | HTRA2    | ENST00000258080 | p.D250N  | c.748     | 0.025068161 | 0     | 1 |
| 5227 | HTRA2    | ENST00000258080 | p.Q279E  | c.835     | 0.025068161 | 5.318 | 1 |
| 5228 | GCKR     | ENST00000264717 | p.E536K  | c.1606    | 0.010237448 | 0     | 1 |
| 5228 | GCKR     | ENST00000264717 | p.A574T  | c.1720    | 0.010237448 | 6.61  | 1 |
| 5229 | FLNB     | ENST00000490882 | p.A1059V | c.3176    | 0.044718016 | 0     | 1 |
| 5229 | FLNB     | ENST00000490882 | p.D1089N | c.3265    | 0.044718016 | 4.483 | 1 |
| 5230 | MARK3    | ENST00000335102 | p.K376Q  | c.1126    | 0.049340909 | 6.663 | 1 |
| 5230 | MARK3    | ENST00000335102 | p.E120K  | c.358     | 4.009868182 | 0     | 5 |
| 5231 | RARB     | ENST00000404969 | p.C105S  | c.313     | 0.06643098  | 0     | 1 |
| 5231 | RARB     | ENST00000404969 | p.Q141E  | c.421     | 0.06643098  | 3.912 | 1 |
| 5232 | MCTS1    | ENST00000371315 | p.T131A  | c.391     | 0.005140057 | 7.604 | 1 |
| 5232 | MCTS1    | ENST00000371315 | p.V133A  | c.398     | 0.005786874 | 7.433 | 1 |
| 5232 | MCTS1    | ENST00000371315 | p.G164D  | c.491     | 0.010926931 | 0     | 1 |
| 5233 | PTPRM    | ENST00000400060 | p.L501I  | c.1501    | 0.029482445 | 6.084 | 1 |
| 5233 | PTPRM    | ENST00000400060 | p.T562A  | c.1684    | 1.014741223 | 0     | 1 |
| 5233 | PTPRM    | ENST00000400060 | p.T562S  | c.1684    | 1.014741223 | 0     | 1 |
| 5234 | HECTD1   | ENST00000399332 | p.D1290H | c.3868    | 0.179617522 | 2.477 | 1 |
| 5234 | HECTD1   | ENST00000399332 | p.K1333R | c.3998    | 0.179617522 | 0     | 1 |
| 5235 | GLUL     | ENST00000311223 | p.R299C  | c.895     | 0.007699604 | 0     | 1 |
| 5235 | GLUL     | ENST00000311223 | p.A321T  | c.961     | 0.007699604 | 7.021 | 1 |
| 5236 | RGS16    | ENST00000367558 | p.A97T   | c.289     | 0.002989252 | 8.386 | 1 |
| 5236 | RGS16    | ENST00000367558 | p.A149S  | c.445     | 0.002989252 | 0     | 1 |
| 5237 | PNPT1    | ENST00000447944 | p.Y334S  | c.1001    | 0.014397878 | 0     | 1 |
| 5237 | PNPT1    | ENST00000447944 | p.S93F   | c.278     | 0.014397878 | 6.118 | 1 |
| 5238 | CYP1A1   | ENST00000567032 | p.G225K  | c.674_673 | 1.002273294 | 0     | 1 |
| 5238 | CYP1A1   | ENST00000567032 | p.G225L  | c.674_673 | 1.002273294 | 0     | 1 |
| 5238 | CYP1A1   | ENST00000567032 | p.S247P  | c.739     | 0.004546588 | 8.781 | 1 |
| 5239 | ENO2     | ENST00000541477 | p.K5Q    | c.13      | 0.018866884 | 5.728 | 1 |
| 5239 | ENO2     | ENST00000541477 | p.A74V   | c.221     | 0.018866884 | 0     | 1 |
| 5240 | PCSK9    | ENST00000302118 | p.G227D  | c.680     | 0.010019817 | 0     | 1 |
| 5240 | PCSK9    | ENST00000302118 | p.P288L  | c.863_864 | 0.010019817 | 6.641 | 1 |
| 5241 | CD180    | ENST00000256447 | p.N244T  | c.731     | 0.014033318 | 6.155 | 1 |
| 5241 | CD180    | ENST00000256447 | p.G270R  | c.808     | 0.014033318 | 0     | 1 |
| 5242 | RPS6KA1  | ENST00000531382 | p.R443H  | c.1328    | 0.016333752 | 5.936 | 1 |

|               |                 |                      |           |             |       |   |
|---------------|-----------------|----------------------|-----------|-------------|-------|---|
| 5242 RPS6KA1  | ENST00000531382 | p.R502W              | c.1504    | 0.016333752 | 0     | 1 |
| 5243 GRM3     | ENST00000361669 | p.S175R              | c.525     | 0.546547745 | 0     | 1 |
| 5243 GRM3     | ENST00000361669 | p.E219K              | c.655     | 0.42796814  | 1.47  | 1 |
| 5243 GRM3     | ENST00000361669 | p.G223R              | c.667     | 0.252551288 | 2.43  | 1 |
| 5244 TBC1D14  | ENST00000448507 | p.E450K              | c.1348    | 0.056344161 | 4.178 | 1 |
| 5244 TBC1D14  | ENST00000448507 | p.I493V              | c.1477    | 0.075132892 | 0     | 1 |
| 5244 TBC1D14  | ENST00000448507 | p.A570V              | c.1709    | 0.020986111 | 5.652 | 1 |
| 5245 GRIK2    | ENST00000421544 | p.R748W              | c.2242    | 1.011033238 | 0     | 1 |
| 5245 GRIK2    | ENST00000421544 | p.R748Q              | c.2243    | 1.011033238 | 0     | 1 |
| 5245 GRIK2    | ENST00000421544 | p.K797R              | c.2390    | 0.022066475 | 6.502 | 1 |
| 5246 CFP      | ENST00000247153 | p.R346H              | c.1037    | 2.002496288 | 0     | 3 |
| 5246 CFP      | ENST00000247153 | p.R368Q              | c.1103    | 0.007488863 | 8.646 | 1 |
| 5247 RNLS     | ENST00000331772 | p.RD138in_frame_delS | c.416_414 | 0.047994071 | 4.381 | 1 |
| 5247 RNLS     | ENST00000331772 | p.D172Y              | c.514     | 0.047994071 | 0     | 1 |
| 5248 NR5A2    | ENST00000367362 | p.D525N              | c.1573    | 0.025382887 | 5.3   | 1 |
| 5248 NR5A2    | ENST00000367362 | p.E329K              | c.985     | 0.025382887 | 0     | 1 |
| 5249 SYK      | ENST00000375754 | p.T371M              | c.1112    | 0.228299563 | 3.131 | 1 |
| 5249 SYK      | ENST00000375754 | p.D603N              | c.1807    | 1.114149781 | 0     | 2 |
| 5250 GUCA1C   | ENST00000261047 | p.E39K               | c.115     | 3.043767385 | 0     | 4 |
| 5250 GUCA1C   | ENST00000261047 | p.T63A               | c.187     | 0.17506954  | 4.514 | 1 |
| 5251 DDX6     | ENST00000264018 | p.K367E              | c.1099    | 0.024013675 | 5.38  | 1 |
| 5251 DDX6     | ENST00000264018 | p.L393M              | c.1177    | 0.024013675 | 0     | 1 |
| 5252 CPA1     | ENST00000011292 | p.W173S              | c.518     | 0.021762679 | 0     | 1 |
| 5252 CPA1     | ENST00000011292 | p.I215V              | c.643     | 0.021762679 | 5.522 | 1 |
| 5253 PIGR     | ENST00000356495 | p.I352N              | c.1055    | 0.00467441  | 7.741 | 1 |
| 5253 PIGR     | ENST00000356495 | p.V245I              | c.733     | 0.00467441  | 0     | 1 |
| 5255 PRCP     | ENST00000393399 | p.D479H              | c.1435    | 0.012081974 | 6.371 | 1 |
| 5255 PRCP     | ENST00000393399 | p.G125W              | c.373     | 0.012081974 | 0     | 1 |
| 5256 RNF168   | ENST00000318037 | p.P38Q               | c.113     | 0.097869287 | 0     | 1 |
| 5256 RNF168   | ENST00000318037 | p.R91G               | c.271     | 0.097869287 | 3.353 | 1 |
| 5257 IL6R     | ENST00000368485 | p.R63K               | c.188     | 0.040582456 | 4.623 | 1 |
| 5257 IL6R     | ENST00000368485 | p.T105S              | c.313     | 0.040582456 | 0     | 1 |
| 5258 GP1BA    | ENST00000329125 | p.P204S              | c.610     | 1.073658713 | 0     | 1 |
| 5258 GP1BA    | ENST00000329125 | p.P204L              | c.611     | 1.073658713 | 0     | 1 |
| 5258 GP1BA    | ENST00000329125 | p.E228D              | c.684     | 0.147317426 | 3.763 | 1 |
| 5259 IGF2R    | ENST00000356956 | p.V1888M             | c.5662    | 0.121161227 | 4.045 | 1 |
| 5259 IGF2R    | ENST00000356956 | p.R1949G             | c.5845    | 1.060580614 | 0     | 1 |
| 5259 IGF2R    | ENST00000356956 | p.R1949Q             | c.5846    | 1.060580614 | 0     | 1 |
| 5260 MRI1     | ENST00000040663 | p.R249H              | c.746     | 0.11558291  | 3.113 | 1 |
| 5260 MRI1     | ENST00000040663 | p.R288H              | c.863     | 0.11558291  | 0     | 1 |
| 5261 PKM      | ENST00000319622 | p.D354N              | c.1060    | 0.124394965 | 0     | 1 |
| 5261 PKM      | ENST00000319622 | p.C317Y              | c.950     | 0.124394965 | 3.007 | 1 |
| 5262 FHOD1    | ENST00000258201 | p.L181F              | c.541     | 0.057911754 | 4.11  | 1 |
| 5262 FHOD1    | ENST00000258201 | p.A222T              | c.664     | 0.057911754 | 0     | 1 |
| 5263 SERPIND1 | ENST00000406799 | p.A161V              | c.482     | 0.009169126 | 0     | 1 |
| 5263 SERPIND1 | ENST00000406799 | p.D223Y              | c.667     | 0.009169126 | 6.769 | 1 |
| 5264 AXL      | ENST00000301178 | p.N43T               | c.128     | 0.010019817 | 0     | 1 |
| 5264 AXL      | ENST00000301178 | p.S128F              | c.383     | 0.010019817 | 6.641 | 1 |
| 5265 ALDH4A1  | ENST00000290597 | p.H358R              | c.1073    | 0.009131072 | 0     | 1 |

|      |           |                 |          |             |             |       |   |
|------|-----------|-----------------|----------|-------------|-------------|-------|---|
| 5265 | ALDH4A1   | ENST00000290597 | p.Y456H  | c.1366      | 0.009131072 | 6.775 | 1 |
| 5266 | FGA       | ENST00000302053 | p.G819R  | c.2455      | 1.012006837 | 0     | 1 |
| 5266 | FGA       | ENST00000302053 | p.G819A  | c.2456      | 1.012006837 | 0     | 1 |
| 5266 | FGA       | ENST00000302053 | p.S852F  | c.2555      | 0.024013675 | 6.38  | 1 |
| 5267 | NFASC     | ENST00000367172 | p.S139Y  | c.416       | 0.074273944 | 0     | 1 |
| 5267 | NFASC     | ENST00000367172 | p.T222I  | c.665       | 0.074273944 | 3.751 | 1 |
| 5268 | RAMP1     | ENST00000409726 | p.T51I   | c.152       | 0.010709241 | 0     | 1 |
| 5268 | RAMP1     | ENST00000409726 | p.L19I   | c.55        | 0.010709241 | 6.545 | 1 |
| 5269 | MASP1     | ENST00000296280 | p.E83Q   | c.247       | 1.013917077 | 0     | 1 |
| 5269 | MASP1     | ENST00000296280 | p.E83D   | c.249       | 1.013917077 | 0     | 1 |
| 5269 | MASP1     | ENST00000296280 | p.S115Y  | c.344       | 0.027834153 | 6.167 | 1 |
| 5270 | MEMO1     | ENST00000379383 | p.G54V   | c.161       | 0.018073253 | 0     | 1 |
| 5270 | MEMO1     | ENST00000379383 | p.Y292F  | c.875       | 0.018073253 | 5.79  | 1 |
| 5271 | ASB9      | ENST00000380488 | p.I56F   | c.166       | 0.002833891 | 0     | 1 |
| 5271 | ASB9      | ENST00000380488 | p.S83F   | c.248       | 0.002833891 | 8.463 | 1 |
| 5272 | PI3       | ENST00000243924 | p.R82W   | c.244       | 1.092823138 | 9.128 | 2 |
| 5272 | PI3       | ENST00000243924 | p.A84P   | c.250       | 3.024436298 | 0     | 1 |
| 5272 | PI3       | ENST00000243924 | p.A84T   | c.250       | 3.024436298 | 0     | 2 |
| 5272 | PI3       | ENST00000243924 | p.A84V   | c.251_252   | 3.024436298 | 0     | 1 |
| 5272 | PI3       | ENST00000243924 | p.C109Y  | c.326       | 0.25479462  | 5.583 | 1 |
| 5273 | MYO5C     | ENST00000261839 | p.L1382S | c.4145      | 0.008961774 | 6.802 | 1 |
| 5273 | MYO5C     | ENST00000261839 | p.K1735R | c.5204      | 0.008961774 | 0     | 1 |
| 5274 | KCNMA1    | ENST00000404771 | p.T1058A | c.3172      | 0.059539875 | 0     | 1 |
| 5274 | KCNMA1    | ENST00000404771 | p.D1107N | c.3319      | 0.059539875 | 4.07  | 1 |
| 5275 | CRAT      | ENST00000318080 | p.R37W   | c.109       | 0.017861536 | 5.807 | 1 |
| 5275 | CRAT      | ENST00000318080 | p.N96K   | c.288       | 0.017861536 | 0     | 1 |
| 5276 | MCL1      | ENST00000369026 | p.D242N  | c.724       | 0.019478144 | 0     | 1 |
| 5276 | MCL1      | ENST00000369026 | p.L290F  | c.870       | 0.019478144 | 5.682 | 1 |
| 5277 | CFH       | ENST00000367429 | p.T690I  | c.2069_2070 | 0.262065619 | 2.932 | 1 |
| 5277 | CFH       | ENST00000367429 | p.G736A  | c.2207      | 1.131032809 | 0     | 1 |
| 5277 | CFH       | ENST00000367429 | p.G736V  | c.2207      | 1.131032809 | 0     | 1 |
| 5278 | MYO5C     | ENST00000261839 | p.A1585V | c.4754      | 0.026923317 | 0     | 1 |
| 5278 | MYO5C     | ENST00000261839 | p.D1707N | c.5119      | 0.026923317 | 5.215 | 1 |
| 5279 | AP4B1     | ENST00000256658 | p.R677W  | c.2029      | 0.167240944 | 2.58  | 1 |
| 5279 | AP4B1     | ENST00000256658 | p.L699S  | c.2096      | 0.167240944 | 0     | 1 |
| 5280 | HSPBP1    | ENST00000255631 | p.A138T  | c.412       | 0.00323056  | 8.274 | 1 |
| 5280 | HSPBP1    | ENST00000255631 | p.A165V  | c.494       | 0.00323056  | 0     | 1 |
| 5281 | POLG      | ENST00000442287 | p.S809G  | c.2425      | 0.005589752 | 0     | 1 |
| 5281 | POLG      | ENST00000442287 | p.I840T  | c.2519      | 0.005589752 | 7.483 | 1 |
| 5282 | REG1A     | ENST00000233735 | p.R109H  | c.326       | 1.126306431 | 0     | 2 |
| 5282 | REG1A     | ENST00000233735 | p.D151Y  | c.451       | 0.252612862 | 2.985 | 1 |
| 5283 | CEACAM5   | ENST00000221992 | p.S599F  | c.1796      | 0.016992006 | 0     | 1 |
| 5283 | CEACAM5   | ENST00000221992 | p.S667P  | c.1999      | 0.016992006 | 5.879 | 1 |
| 5284 | TMPRSS11E | ENST00000305363 | p.A389S  | c.1165      | 0.032272462 | 5.051 | 1 |
| 5284 | TMPRSS11E | ENST00000305363 | p.I192M  | c.576       | 0.071986733 | 3.839 | 1 |
| 5284 | TMPRSS11E | ENST00000305363 | p.G315E  | c.944       | 0.10004346  | 0     | 1 |
| 5285 | IMPA1     | ENST00000449740 | p.H159R  | c.476       | 0.212851531 | 0     | 1 |
| 5285 | IMPA1     | ENST00000449740 | p.K215T  | c.644       | 0.148532135 | 2.855 | 1 |
| 5285 | IMPA1     | ENST00000449740 | p.S216Y  | c.647       | 0.084951003 | 3.744 | 1 |

|               |                 |         |        |             |       |   |
|---------------|-----------------|---------|--------|-------------|-------|---|
| 5286 MME      | ENST00000360490 | p.K437E | c.1309 | 0.025443782 | 5.36  | 1 |
| 5286 MME      | ENST00000360490 | p.P483A | c.1447 | 0.069315567 | 0     | 1 |
| 5286 MME      | ENST00000360490 | p.E534Q | c.1600 | 0.046061563 | 4.475 | 1 |
| 5287 HMGCS2   | ENST00000369406 | p.D151N | c.451  | 0.004651785 | 7.748 | 1 |
| 5287 HMGCS2   | ENST00000369406 | p.E236Q | c.706  | 0.004651785 | 0     | 1 |
| 5288 CYP7A1   | ENST00000301645 | p.L467F | c.1401 | 0.063460381 | 3.978 | 1 |
| 5288 CYP7A1   | ENST00000301645 | p.W166C | c.498  | 0.063460381 | 0     | 1 |
| 5289 ADSL     | ENST00000454266 | p.T368M | c.1103 | 0.083273427 | 3.586 | 1 |
| 5289 ADSL     | ENST00000454266 | p.R314C | c.940  | 0.083273427 | 0     | 1 |
| 5291 EXOSC10  | ENST00000376936 | p.R427C | c.1279 | 0.008104843 | 6.947 | 1 |
| 5291 EXOSC10  | ENST00000376936 | p.P183S | c.547  | 0.008104843 | 0     | 1 |
| 5292 CPOX     | ENST00000264193 | p.P363T | c.1087 | 0.047202268 | 0     | 1 |
| 5292 CPOX     | ENST00000264193 | p.G280E | c.839  | 0.047202268 | 4.405 | 1 |
| 5293 ERBB3    | ENST00000267101 | p.M60R  | c.179  | 0.057312753 | 0     | 1 |
| 5293 ERBB3    | ENST00000267101 | p.G284R | c.850  | 0.057312753 | 4.125 | 1 |
| 5294 C8A      | ENST00000361249 | p.E493K | c.1477 | 0.041781265 | 0     | 1 |
| 5294 C8A      | ENST00000361249 | p.L159M | c.475  | 0.041781265 | 4.581 | 1 |
| 5296 PARP3    | ENST00000398755 | p.E425D | c.1275 | 0.161992621 | 2.626 | 1 |
| 5296 PARP3    | ENST00000398755 | p.T482I | c.1445 | 0.161992621 | 0     | 1 |
| 5297 CYP2R1   | ENST00000334636 | p.N373S | c.1118 | 0.018312848 | 5.771 | 1 |
| 5297 CYP2R1   | ENST00000334636 | p.W321R | c.961  | 0.018312848 | 0     | 1 |
| 5298 CHEK1    | ENST00000427383 | p.H138Y | c.412  | 0.016851257 | 0     | 1 |
| 5298 CHEK1    | ENST00000427383 | p.Y173H | c.517  | 0.016851257 | 5.891 | 1 |
| 5299 DDX58    | ENST00000379883 | p.R109H | c.326  | 0.05230164  | 4.257 | 1 |
| 5299 DDX58    | ENST00000379883 | p.A30T  | c.88   | 0.05230164  | 0     | 1 |
| 5300 FOLH1    | ENST00000256999 | p.D230H | c.688  | 0.162329825 | 0     | 1 |
| 5300 FOLH1    | ENST00000256999 | p.G321R | c.961  | 0.162329825 | 2.623 | 1 |
| 5301 FGFR4    | ENST00000502906 | p.V168D | c.503  | 0.016198455 | 6.948 | 1 |
| 5301 FGFR4    | ENST00000502906 | p.R203C | c.607  | 1.008099227 | 0     | 2 |
| 5302 REM1     | ENST00000201979 | p.T128N | c.383  | 0.001932923 | 0     | 1 |
| 5302 REM1     | ENST00000201979 | p.R201H | c.602  | 0.001932923 | 9.015 | 1 |
| 5303 APOBEC3G | ENST00000452957 | p.L193I | c.577  | 0.068203992 | 3.874 | 1 |
| 5303 APOBEC3G | ENST00000452957 | p.R238C | c.712  | 0.068203992 | 0     | 1 |
| 5304 CTNBL1   | ENST00000361383 | p.D186N | c.556  | 0.195874297 | 2.352 | 1 |
| 5304 CTNBL1   | ENST00000361383 | p.R229Q | c.686  | 0.195874297 | 0     | 1 |
| 5305 RRAGD    | ENST00000369415 | p.K180T | c.539  | 0.005299236 | 0     | 1 |
| 5305 RRAGD    | ENST00000369415 | p.I226V | c.676  | 0.005299236 | 7.56  | 1 |
| 5306 STS      | ENST00000217961 | p.P545R | c.1634 | 0.015009295 | 6.058 | 1 |
| 5306 STS      | ENST00000217961 | p.P112S | c.334  | 0.015009295 | 0     | 1 |
| 5307 C8B      | ENST00000371237 | p.N373K | c.1119 | 0.007104752 | 0     | 1 |
| 5307 C8B      | ENST00000371237 | p.C403Y | c.1208 | 0.007104752 | 7.137 | 1 |
| 5308 VCAM1    | ENST00000294728 | p.H157D | c.469  | 0.007625248 | 7.035 | 1 |
| 5308 VCAM1    | ENST00000294728 | p.V192A | c.575  | 0.007625248 | 0     | 1 |
| 5309 PLCB2    | ENST00000260402 | p.R700H | c.2099 | 0.096722812 | 0     | 1 |
| 5309 PLCB2    | ENST00000260402 | p.A749T | c.2245 | 0.096722812 | 3.37  | 1 |
| 5310 ITCH     | ENST00000262650 | p.R800H | c.2399 | 0.202500868 | 3.304 | 1 |
| 5310 ITCH     | ENST00000262650 | p.R874H | c.2621 | 1.101250434 | 0     | 2 |
| 5311 KIF3C    | ENST00000264712 | p.Y145C | c.434  | 0.009786441 | 6.675 | 1 |
| 5311 KIF3C    | ENST00000264712 | p.S182P | c.544  | 0.009786441 | 0     | 1 |

|               |                 |          |        |             |       |   |
|---------------|-----------------|----------|--------|-------------|-------|---|
| 5312 BRPF3    | ENST00000357641 | p.R1085P | c.3254 | 0.009420374 | 0     | 1 |
| 5312 BRPF3    | ENST00000357641 | p.Q1146H | c.3438 | 0.009420374 | 6.73  | 1 |
| 5313 CYP2A13  | ENST00000330436 | p.F383L  | c.1149 | 0.036676506 | 0     | 1 |
| 5313 CYP2A13  | ENST00000330436 | p.G31E   | c.92   | 0.036676506 | 4.769 | 1 |
| 5314 DCLK1    | ENST00000360631 | p.G65R   | c.193  | 1.184028358 | 0     | 2 |
| 5314 DCLK1    | ENST00000360631 | p.K138N  | c.414  | 0.368056716 | 2.442 | 1 |
| 5315 CDYL     | ENST00000328908 | p.A465S  | c.1393 | 0.051083458 | 0     | 1 |
| 5315 CDYL     | ENST00000328908 | p.A511V  | c.1532 | 0.051083458 | 4.291 | 1 |
| 5316 BDNF     | ENST00000439476 | p.V140M  | c.418  | 0.024130473 | 5.373 | 1 |
| 5316 BDNF     | ENST00000439476 | p.G195S  | c.583  | 0.024130473 | 0     | 1 |
| 5317 CLK2     | ENST00000536801 | p.G368C  | c.1102 | 0.001970804 | 8.987 | 1 |
| 5317 CLK2     | ENST00000536801 | p.D454N  | c.1360 | 0.001970804 | 0     | 1 |
| 5318 CFH      | ENST00000367429 | p.P1124R | c.3371 | 0.01574459  | 0     | 1 |
| 5318 CFH      | ENST00000367429 | p.R1149Q | c.3446 | 0.01574459  | 5.989 | 1 |
| 5319 SETMAR   | ENST00000358065 | p.T213A  | c.637  | 0.029157281 | 0     | 1 |
| 5319 SETMAR   | ENST00000358065 | p.L283V  | c.847  | 0.029157281 | 5.1   | 1 |
| 5320 PNLIPRP1 | ENST00000358834 | p.A198V  | c.593  | 0.010858736 | 0     | 1 |
| 5320 PNLIPRP1 | ENST00000358834 | p.T235A  | c.703  | 0.010858736 | 6.525 | 1 |
| 5321 TPK1     | ENST00000360057 | p.Q109K  | c.325  | 0.083273427 | 0     | 1 |
| 5321 TPK1     | ENST00000360057 | p.P150S  | c.448  | 0.083273427 | 3.586 | 1 |
| 5322 ITPK1    | ENST00000267615 | p.P153S  | c.457  | 0.014720801 | 0     | 1 |
| 5322 ITPK1    | ENST00000267615 | p.S223L  | c.668  | 0.014720801 | 6.086 | 1 |
| 5323 C7       | ENST00000313164 | p.T814M  | c.2441 | 0.194386509 | 0     | 1 |
| 5323 C7       | ENST00000313164 | p.A840V  | c.2519 | 0.194386509 | 2.363 | 1 |
| 5324 TLR8     | ENST00000311912 | p.E624K  | c.1870 | 0.010358795 | 6.593 | 1 |
| 5324 TLR8     | ENST00000311912 | p.S651T  | c.1951 | 0.010358795 | 0     | 1 |
| 5325 RYR2     | ENST00000360064 | p.E253Q  | c.757  | 0.011784219 | 0     | 1 |
| 5325 RYR2     | ENST00000360064 | p.D316H  | c.946  | 0.011784219 | 6.407 | 1 |
| 5326 GSR      | ENST00000221130 | p.R335W  | c.1003 | 1.013975077 | 0     | 1 |
| 5326 GSR      | ENST00000221130 | p.R335Q  | c.1004 | 1.013975077 | 0     | 1 |
| 5326 GSR      | ENST00000221130 | p.F362I  | c.1084 | 0.027950153 | 6.161 | 1 |
| 5327 CFHR2    | ENST00000367421 | p.G244A  | c.731  | 0.115823508 | 3.11  | 1 |
| 5327 CFHR2    | ENST00000367421 | p.E269K  | c.805  | 0.115823508 | 0     | 1 |
| 5328 SETD7    | ENST00000274031 | p.L82I   | c.244  | 0.007899626 | 0     | 1 |
| 5328 SETD7    | ENST00000274031 | p.R115H  | c.344  | 0.007899626 | 6.984 | 1 |
| 5329 PGD      | ENST00000270776 | p.Q337E  | c.1009 | 0.048934644 | 0     | 1 |
| 5329 PGD      | ENST00000270776 | p.V276I  | c.826  | 0.048934644 | 4.353 | 1 |
| 5330 CD274    | ENST00000381577 | p.S93Y   | c.278  | 0.062543337 | 3.999 | 1 |
| 5330 CD274    | ENST00000381577 | p.A18T   | c.52   | 0.062543337 | 0     | 1 |
| 5331 ANK1     | ENST00000396942 | p.D695N  | c.2083 | 0.076839929 | 4.702 | 1 |
| 5331 ANK1     | ENST00000396942 | p.A729T  | c.2185 | 1.038419965 | 0     | 2 |
| 5332 MAPK3    | ENST00000263025 | p.R152W  | c.454  | 0.016030909 | 0     | 1 |
| 5332 MAPK3    | ENST00000263025 | p.I182N  | c.545  | 0.016030909 | 5.963 | 1 |
| 5333 PTPRG    | ENST00000474889 | p.R857C  | c.2569 | 0.019090517 | 0     | 1 |
| 5333 PTPRG    | ENST00000474889 | p.R959Q  | c.2876 | 0.019090517 | 5.711 | 1 |
| 5334 F11R     | ENST00000368026 | p.P58S   | c.172  | 1.002611329 | 0     | 1 |
| 5334 F11R     | ENST00000368026 | p.P58L   | c.173  | 1.002611329 | 0     | 1 |
| 5334 F11R     | ENST00000368026 | p.G120W  | c.358  | 0.005222658 | 8.581 | 1 |
| 5335 SNRNP200 | ENST00000323853 | p.R637Q  | c.1910 | 1.174671005 | 0     | 2 |

|               |                 |          |           |             |       |   |
|---------------|-----------------|----------|-----------|-------------|-------|---|
| 5335 SNRNP200 | ENST00000323853 | p.N909H  | c.2725    | 0.484653487 | 2.77  | 1 |
| 5335 SNRNP200 | ENST00000323853 | p.K1544N | c.4632    | 0.247578023 | 5.155 | 1 |
| 5336 PANK1    | ENST00000307534 | p.D467N  | c.1399    | 0.00669825  | 0     | 1 |
| 5336 PANK1    | ENST00000307534 | p.S508C  | c.1523    | 0.00669825  | 7.222 | 1 |
| 5337 ACE2     | ENST00000427411 | p.R169I  | c.506     | 1.102663838 | 0     | 2 |
| 5337 ACE2     | ENST00000427411 | p.W271C  | c.813     | 0.205327675 | 3.284 | 1 |
| 5338 CRYL1    | ENST00000298248 | p.P162L  | c.485     | 0.034987903 | 0     | 1 |
| 5338 CRYL1    | ENST00000298248 | p.E189D  | c.567     | 0.034987903 | 4.837 | 1 |
| 5339 ACVR1    | ENST00000409283 | p.G356D  | c.1067    | 0.175127587 | 0     | 1 |
| 5339 ACVR1    | ENST00000409283 | p.R247K  | c.740     | 0.161083179 | 2.658 | 1 |
| 5339 ACVR1    | ENST00000409283 | p.L251S  | c.752     | 0.019332636 | 5.905 | 1 |
| 5340 ACVR1    | ENST00000409283 | p.L495F  | c.1485    | 0.020039634 | 0     | 1 |
| 5340 ACVR1    | ENST00000409283 | p.R307Q  | c.920     | 0.020039634 | 5.641 | 1 |
| 5341 EDA      | ENST00000374552 | p.L266I  | c.796     | 0.014278245 | 7.715 | 1 |
| 5341 EDA      | ENST00000374552 | p.R289C  | c.865     | 2.004759415 | 0     | 1 |
| 5341 EDA      | ENST00000374552 | p.R289S  | c.865     | 2.004759415 | 0     | 1 |
| 5341 EDA      | ENST00000374552 | p.R289N  | c.865_866 | 2.004759415 | 0     | 1 |
| 5342 ESRRA    | ENST00000000442 | p.E419K  | c.1255    | 0.081672828 | 3.614 | 1 |
| 5342 ESRRA    | ENST00000000442 | p.G301D  | c.902     | 0.081672828 | 0     | 1 |
| 5343 BIN2     | ENST00000267012 | p.L68R   | c.203     | 0.098498807 | 0     | 1 |
| 5343 BIN2     | ENST00000267012 | p.E114K  | c.340     | 0.089374062 | 3.484 | 1 |
| 5343 BIN2     | ENST00000267012 | p.R123K  | c.368     | 0.009124745 | 6.776 | 1 |
| 5344 PRKAA2   | ENST00000371244 | p.R407Q  | c.1220    | 1.006958538 | 0     | 2 |
| 5344 PRKAA2   | ENST00000371244 | p.D461N  | c.1381    | 0.013917077 | 7.167 | 1 |
| 5345 KIN      | ENST00000379562 | p.R83C   | c.247     | 0.09226965  | 3.438 | 1 |
| 5345 KIN      | ENST00000379562 | p.K160M  | c.479     | 0.09226965  | 0     | 1 |
| 5346 RGS7     | ENST00000407727 | p.K451N  | c.1353    | 0.033383564 | 0     | 1 |
| 5346 RGS7     | ENST00000407727 | p.S323R  | c.969     | 0.016142412 | 5.953 | 1 |
| 5346 RGS7     | ENST00000407727 | p.V327I  | c.979     | 0.017241152 | 5.858 | 1 |
| 5347 MAPRE3   | ENST00000233121 | p.F63V   | c.187     | 0.258816231 | 0     | 1 |
| 5347 MAPRE3   | ENST00000233121 | p.R130Q  | c.389     | 0.258816231 | 1.95  | 1 |
| 5348 PCK1     | ENST00000319441 | p.M60I   | c.180     | 0.017145812 | 5.866 | 1 |
| 5348 PCK1     | ENST00000319441 | p.V166M  | c.496     | 0.017145812 | 0     | 1 |
| 5349 CNTN2    | ENST00000331830 | p.R140Q  | c.419     | 0.010401966 | 0     | 1 |
| 5349 CNTN2    | ENST00000331830 | p.S206F  | c.617     | 0.010401966 | 6.587 | 1 |
| 5350 GALNS    | ENST00000268695 | p.T235M  | c.704     | 0.076362069 | 0     | 1 |
| 5350 GALNS    | ENST00000268695 | p.V258I  | c.772     | 0.076362069 | 3.711 | 1 |
| 5351 CUL1     | ENST00000602748 | p.C53Y   | c.158     | 0.013084476 | 6.256 | 1 |
| 5351 CUL1     | ENST00000602748 | p.N141S  | c.422     | 0.013084476 | 0     | 1 |
| 5352 PASK     | ENST00000358649 | p.G1085S | c.3253    | 0.002034655 | 0     | 1 |
| 5352 PASK     | ENST00000358649 | p.E1145K | c.3433    | 0.002034655 | 8.941 | 1 |
| 5353 RAB6B    | ENST00000285208 | p.R60H   | c.179     | 0.100690536 | 3.312 | 1 |
| 5353 RAB6B    | ENST00000285208 | p.P175L  | c.524     | 0.100690536 | 0     | 1 |
| 5354 RAP1A    | ENST00000436150 | p.T89M   | c.266     | 0.069733708 | 0     | 1 |
| 5354 RAP1A    | ENST00000436150 | p.S11L   | c.32      | 0.069733708 | 3.842 | 1 |
| 5355 OAS1     | ENST00000445409 | p.D75E   | c.225     | 0.060162153 | 0     | 1 |
| 5355 OAS1     | ENST00000445409 | p.I30T   | c.89      | 0.060162153 | 4.055 | 1 |
| 5356 STK4     | ENST00000372806 | p.T120M  | c.359     | 0.082698215 | 3.596 | 1 |
| 5356 STK4     | ENST00000372806 | p.E219K  | c.655     | 0.082698215 | 0     | 1 |

|              |                 |          |        |             |       |   |
|--------------|-----------------|----------|--------|-------------|-------|---|
| 5357 MSL3    | ENST00000312196 | p.K475N  | c.1425 | 0.00530291  | 0     | 1 |
| 5357 MSL3    | ENST00000312196 | p.L253F  | c.757  | 0.00530291  | 7.559 | 1 |
| 5358 TASP1   | ENST00000337743 | p.C349S  | c.1045 | 0.077750728 | 0     | 1 |
| 5358 TASP1   | ENST00000337743 | p.Y284C  | c.851  | 0.077750728 | 3.685 | 1 |
| 5359 SETD2   | ENST00000409792 | p.P1979L | c.5936 | 0.03742121  | 4.74  | 1 |
| 5359 SETD2   | ENST00000409792 | p.D2007Y | c.6019 | 0.03742121  | 0     | 1 |
| 5360 ALOX15B | ENST00000380183 | p.D505N  | c.1513 | 0.026663316 | 0     | 1 |
| 5360 ALOX15B | ENST00000380183 | p.R138L  | c.413  | 0.026663316 | 5.229 | 1 |
| 5361 CPB1    | ENST00000282957 | p.A352S  | c.1054 | 0.087899575 | 3.508 | 1 |
| 5361 CPB1    | ENST00000282957 | p.A317S  | c.949  | 0.087899575 | 0     | 1 |
| 5362 CSTA    | ENST00000264474 | p.M65T   | c.194  | 0.281264621 | 0     | 1 |
| 5362 CSTA    | ENST00000264474 | p.L27P   | c.80   | 0.281264621 | 1.83  | 1 |
| 5363 AAMDC   | ENST00000533193 | p.Q109H  | c.327  | 0.090370768 | 3.468 | 1 |
| 5363 AAMDC   | ENST00000533193 | p.I136V  | c.406  | 0.090370768 | 0     | 1 |
| 5364 MTRR    | ENST00000264668 | p.L401F  | c.1201 | 0.089250249 | 3.486 | 1 |
| 5364 MTRR    | ENST00000264668 | p.P473S  | c.1417 | 0.089250249 | 0     | 1 |
| 5365 CYP11A1 | ENST00000268053 | p.R204H  | c.611  | 1.014741223 | 0     | 2 |
| 5365 CYP11A1 | ENST00000268053 | p.S332F  | c.995  | 0.044223668 | 6.084 | 1 |
| 5366 MALT1   | ENST00000348428 | p.E368G  | c.1103 | 0.018010724 | 5.795 | 1 |
| 5366 MALT1   | ENST00000348428 | p.K513T  | c.1538 | 0.018010724 | 0     | 1 |
| 5367 PAK7    | ENST00000378423 | p.A555D  | c.1664 | 0.010124539 | 0     | 1 |
| 5367 PAK7    | ENST00000378423 | p.A691T  | c.2071 | 0.010124539 | 6.626 | 1 |
| 5368 C1S     | ENST00000328916 | p.D537Y  | c.1609 | 0.017062821 | 5.873 | 1 |
| 5368 C1S     | ENST00000328916 | p.K644N  | c.1932 | 0.017062821 | 0     | 1 |
| 5369 PAK7    | ENST00000378423 | p.M523I  | c.1569 | 0.010380358 | 6.59  | 1 |
| 5369 PAK7    | ENST00000378423 | p.D586N  | c.1756 | 0.010380358 | 0     | 1 |
| 5370 SEC24B  | ENST00000504968 | p.L621P  | c.1862 | 0.079054971 | 3.661 | 1 |
| 5370 SEC24B  | ENST00000504968 | p.R1024K | c.3071 | 0.079054971 | 0     | 1 |
| 5371 F5      | ENST00000367796 | p.R676G  | c.2026 | 0.075939799 | 3.719 | 1 |
| 5371 F5      | ENST00000367796 | p.Y1736C | c.5207 | 0.075939799 | 0     | 1 |
| 5372 PAPOLG  | ENST00000238714 | p.A151V  | c.452  | 0.028359974 | 0     | 1 |
| 5372 PAPOLG  | ENST00000238714 | p.R198H  | c.593  | 0.028359974 | 5.14  | 1 |
| 5373 FNBP1   | ENST00000446176 | p.Q54H   | c.162  | 0.01610888  | 6.956 | 1 |
| 5373 FNBP1   | ENST00000446176 | p.E79K   | c.235  | 1.00805444  | 0     | 2 |
| 5374 FGF2    | ENST00000264498 | p.I176F  | c.526  | 0.214047071 | 2.224 | 1 |
| 5374 FGF2    | ENST00000264498 | p.A226V  | c.677  | 0.214047071 | 0     | 1 |
| 5375 IL15    | ENST00000529613 | p.E76V   | c.227  | 0.007380836 | 7.082 | 1 |
| 5375 IL15    | ENST00000529613 | p.E141K  | c.421  | 0.007380836 | 0     | 1 |
| 5376 CKM     | ENST00000221476 | p.P143T  | c.427  | 0.061154477 | 0     | 1 |
| 5376 CKM     | ENST00000221476 | p.E231K  | c.691  | 0.057193698 | 4.128 | 1 |
| 5376 CKM     | ENST00000221476 | p.M272T  | c.815  | 0.003960779 | 7.98  | 1 |
| 5377 AGO1    | ENST00000373204 | p.D51N   | c.151  | 0.043525359 | 5.522 | 1 |
| 5377 AGO1    | ENST00000373204 | p.R139Q  | c.416  | 1.021762679 | 0     | 2 |
| 5378 CDK12   | ENST00000447079 | p.R773H  | c.2318 | 0.07899814  | 5.247 | 1 |
| 5378 CDK12   | ENST00000447079 | p.K853N  | c.2559 | 0.033858145 | 6.781 | 1 |
| 5378 CDK12   | ENST00000447079 | p.R882W  | c.2644 | 2.035425889 | 0     | 2 |
| 5378 CDK12   | ENST00000447079 | p.R882L  | c.2645 | 2.035425889 | 0     | 1 |
| 5379 DFNB31  | ENST00000362057 | p.I353F  | c.1057 | 1.14569265  | 0     | 1 |
| 5379 DFNB31  | ENST00000362057 | p.I353M  | c.1059 | 1.14569265  | 0     | 1 |



|      |         |                 |         |        |             |       |   |
|------|---------|-----------------|---------|--------|-------------|-------|---|
| 5379 | DFNB31  | ENST00000362057 | p.D393N | c.1177 | 0.2913853   | 2.779 | 1 |
| 5380 | NLGN4X  | ENST00000381095 | p.W527L | c.1580 | 1.100133735 | 4.32  | 1 |
| 5380 | NLGN4X  | ENST00000381095 | p.W527C | c.1581 | 1.100133735 | 4.32  | 1 |
| 5380 | NLGN4X  | ENST00000381095 | p.F251Y | c.752  | 1.100133735 | 0     | 1 |
| 5380 | NLGN4X  | ENST00000381095 | p.F251L | c.753  | 1.100133735 | 0     | 1 |
| 5381 | AQP2    | ENST00000199280 | p.A70V  | c.209  | 0.02373237  | 5.397 | 1 |
| 5381 | AQP2    | ENST00000199280 | p.N184I | c.551  | 0.02373237  | 0     | 1 |
| 5382 | DDX58   | ENST00000379883 | p.L391V | c.1171 | 0.04965215  | 4.332 | 1 |
| 5382 | DDX58   | ENST00000379883 | p.K788T | c.2363 | 0.04965215  | 0     | 1 |
| 5383 | JMJD6   | ENST00000445478 | p.H187N | c.559  | 0.073302184 | 3.77  | 1 |
| 5383 | JMJD6   | ENST00000445478 | p.W271C | c.813  | 0.073302184 | 0     | 1 |
| 5384 | SFTPD   | ENST00000372292 | p.G145E | c.434  | 0.009175484 | 6.768 | 1 |
| 5384 | SFTPD   | ENST00000372292 | p.H240R | c.719  | 0.009175484 | 0     | 1 |
| 5385 | DTX3L   | ENST00000296161 | p.R660Q | c.1979 | 0.007577827 | 0     | 1 |
| 5385 | DTX3L   | ENST00000296161 | p.H708R | c.2123 | 0.007577827 | 7.044 | 1 |
| 5386 | B4GALT1 | ENST00000379731 | p.F232S | c.695  | 0.011288519 | 6.469 | 1 |
| 5386 | B4GALT1 | ENST00000379731 | p.L292P | c.875  | 0.011288519 | 0     | 1 |
| 5387 | GFPT1   | ENST00000357308 | p.Q404E | c.1210 | 0.024013675 | 0     | 1 |
| 5387 | GFPT1   | ENST00000357308 | p.N426H | c.1276 | 0.024013675 | 5.38  | 1 |
| 5388 | NEU2    | ENST00000233840 | p.E355K | c.1063 | 0.014833471 | 6.075 | 1 |
| 5388 | NEU2    | ENST00000233840 | p.R41W  | c.121  | 0.014833471 | 0     | 1 |
| 5389 | STARD6  | ENST00000307844 | p.P58T  | c.172  | 0.099580012 | 3.328 | 1 |
| 5389 | STARD6  | ENST00000307844 | p.R119C | c.355  | 0.099580012 | 0     | 1 |
| 5390 | LANCL1  | ENST00000443314 | p.R41W  | c.121  | 0.013021144 | 6.263 | 1 |
| 5390 | LANCL1  | ENST00000443314 | p.D81N  | c.241  | 0.013021144 | 0     | 1 |
| 5391 | MLKL    | ENST00000308807 | p.E351K | c.1051 | 0.097193254 | 3.363 | 1 |
| 5391 | MLKL    | ENST00000308807 | p.G330R | c.988  | 0.097193254 | 0     | 1 |
| 5392 | GBA     | ENST00000327247 | p.L280F | c.840  | 0.011461979 | 0     | 1 |
| 5392 | GBA     | ENST00000327247 | p.D322N | c.964  | 0.011461979 | 6.447 | 1 |
| 5393 | RNF41   | ENST00000552656 | p.A209V | c.626  | 0.046520164 | 4.426 | 1 |
| 5393 | RNF41   | ENST00000552656 | p.E316D | c.948  | 0.046520164 | 0     | 1 |
| 5394 | BHMT    | ENST00000274353 | p.I13N  | c.38   | 0.01924997  | 5.699 | 1 |
| 5394 | BHMT    | ENST00000274353 | p.S211Y | c.632  | 0.01924997  | 0     | 1 |
| 5395 | GRM7    | ENST00000467425 | p.T354A | c.1060 | 0.016367752 | 5.933 | 1 |
| 5395 | GRM7    | ENST00000467425 | p.R395I | c.1184 | 0.016367752 | 0     | 1 |
| 5396 | ESR1    | ENST00000440973 | p.H196R | c.587  | 0.611010737 | 2.301 | 1 |
| 5396 | ESR1    | ENST00000440973 | p.Y197C | c.590  | 0.035412165 | 6.499 | 1 |
| 5396 | ESR1    | ENST00000440973 | p.E247K | c.739  | 2.2139786   | 0     | 3 |
| 5397 | CASQ2   | ENST00000261448 | p.I149S | c.446  | 0.009303569 | 6.748 | 1 |
| 5397 | CASQ2   | ENST00000261448 | p.F195L | c.585  | 0.009303569 | 0     | 1 |
| 5398 | MAOB    | ENST00000378069 | p.R87C  | c.259  | 0.018645871 | 5.745 | 1 |
| 5398 | MAOB    | ENST00000378069 | p.F168L | c.504  | 0.007494251 | 7.06  | 1 |
| 5398 | MAOB    | ENST00000378069 | p.S200L | c.599  | 0.026140122 | 0     | 1 |
| 5399 | CSF2RB  | ENST00000406230 | p.R34C  | c.100  | 0.016851257 | 5.891 | 1 |
| 5399 | CSF2RB  | ENST00000406230 | p.A85S  | c.253  | 0.016851257 | 0     | 1 |
| 5400 | PRPF4B  | ENST00000480058 | p.F854C | c.2561 | 0.007635826 | 0     | 1 |
| 5400 | PRPF4B  | ENST00000480058 | p.T878I | c.2633 | 0.007635826 | 7.033 | 1 |
| 5401 | MAP3K7  | ENST00000369329 | p.V212F | c.634  | 0.019011287 | 0     | 1 |
| 5401 | MAP3K7  | ENST00000369329 | p.R265H | c.794  | 0.019011287 | 5.717 | 1 |

|      |        |                 |          |           |             |       |   |
|------|--------|-----------------|----------|-----------|-------------|-------|---|
| 5402 | ITGAX  | ENST00000562522 | p.L381M  | c.1141    | 0.102592701 | 3.285 | 1 |
| 5402 | ITGAX  | ENST00000562522 | p.Q438H  | c.1314    | 0.102592701 | 0     | 1 |
| 5403 | DDI1   | ENST00000302259 | p.P254S  | c.760     | 1.272815969 | 2.874 | 1 |
| 5403 | DDI1   | ENST00000302259 | p.P254L  | c.761     | 1.272815969 | 2.874 | 1 |
| 5403 | DDI1   | ENST00000302259 | p.R275Q  | c.824     | 1.272815969 | 0     | 2 |
| 5404 | GAN    | ENST00000568107 | p.Q176E  | c.526     | 0.005566553 | 7.489 | 1 |
| 5404 | GAN    | ENST00000568107 | p.H213N  | c.637     | 0.005566553 | 0     | 1 |
| 5405 | EGF    | ENST00000265171 | p.Y983C  | c.2948    | 0.00682952  | 7.194 | 1 |
| 5405 | EGF    | ENST00000265171 | p.G1009V | c.3026    | 0.00682952  | 0     | 1 |
| 5407 | KYNU   | ENST00000264170 | p.R358W  | c.1072    | 0.1376427   | 0     | 1 |
| 5407 | KYNU   | ENST00000264170 | p.R399Q  | c.1196    | 0.1376427   | 2.861 | 1 |
| 5408 | MYO5B  | ENST00000285039 | p.P1675H | c.5024    | 0.015345931 | 6.026 | 1 |
| 5408 | MYO5B  | ENST00000285039 | p.P1823Q | c.5468    | 0.015345931 | 0     | 1 |
| 5409 | USB1   | ENST00000219281 | p.N80S   | c.239     | 0.065244495 | 0     | 1 |
| 5409 | USB1   | ENST00000219281 | p.R130H  | c.389     | 0.065244495 | 3.938 | 1 |
| 5410 | RNASEL | ENST00000444138 | p.G239Q  | c.716_715 | 0.066846693 | 3.903 | 1 |
| 5410 | RNASEL | ENST00000444138 | p.S271T  | c.812     | 0.066846693 | 0     | 1 |
| 5411 | TNPO1  | ENST00000337273 | p.A202T  | c.604     | 0.010365978 | 6.592 | 1 |
| 5411 | TNPO1  | ENST00000337273 | p.S223Y  | c.668     | 0.010365978 | 0     | 1 |
| 5412 | NUDT5  | ENST00000378937 | p.W59R   | c.175     | 0.022923959 | 0     | 1 |
| 5412 | NUDT5  | ENST00000378937 | p.G178V  | c.533     | 0.022923959 | 5.447 | 1 |
| 5413 | KPNB1  | ENST00000540627 | p.L569M  | c.1705    | 0.092911437 | 3.428 | 1 |
| 5413 | KPNB1  | ENST00000540627 | p.L594V  | c.1780    | 0.092911437 | 0     | 1 |
| 5414 | IMPDH1 | ENST00000338791 | p.P274S  | c.820     | 0.003033082 | 0     | 1 |
| 5414 | IMPDH1 | ENST00000338791 | p.L303V  | c.907     | 0.003033082 | 8.365 | 1 |
| 5415 | ROCK1  | ENST00000399799 | p.S118F  | c.353     | 0.007345111 | 7.089 | 1 |
| 5415 | ROCK1  | ENST00000399799 | p.T233A  | c.697     | 0.007345111 | 0     | 1 |
| 5416 | PDK4   | ENST00000005178 | p.R58Q   | c.173     | 0.156800276 | 2.673 | 1 |
| 5416 | PDK4   | ENST00000005178 | p.F102V  | c.304     | 0.156800276 | 0     | 1 |
| 5417 | FABP3  | ENST00000373713 | p.G121S  | c.361     | 0.05230164  | 4.257 | 1 |
| 5417 | FABP3  | ENST00000373713 | p.D18V   | c.53      | 0.05230164  | 0     | 1 |
| 5418 | TNKS2  | ENST00000371627 | p.A1062V | c.3185    | 0.070854338 | 0     | 1 |
| 5418 | TNKS2  | ENST00000371627 | p.A1137D | c.3410    | 0.070854338 | 3.819 | 1 |
| 5419 | RPL10  | ENST00000344746 | p.E56K   | c.166     | 0.023798262 | 5.393 | 1 |
| 5419 | RPL10  | ENST00000344746 | p.P160S  | c.478     | 0.023798262 | 0     | 1 |
| 5420 | MMAB   | ENST00000545712 | p.S180L  | c.539     | 0.006910472 | 7.177 | 1 |
| 5420 | MMAB   | ENST00000545712 | p.A227V  | c.680     | 0.006910472 | 0     | 1 |
| 5421 | KSR2   | ENST00000339824 | p.A869T  | c.2605    | 0.005585879 | 0     | 1 |
| 5421 | KSR2   | ENST00000339824 | p.L894I  | c.2680    | 0.005585879 | 7.484 | 1 |
| 5422 | COP55  | ENST00000357849 | p.L60S   | c.179     | 0.010979834 | 6.509 | 1 |
| 5422 | COP55  | ENST00000357849 | p.R235C  | c.703     | 0.010979834 | 0     | 1 |
| 5423 | F7     | ENST00000375581 | p.H408Y  | c.1222    | 0.021021363 | 5.572 | 1 |
| 5423 | F7     | ENST00000375581 | p.L333M  | c.997     | 0.021021363 | 0     | 1 |
| 5424 | BHMT   | ENST00000274353 | p.L355I  | c.1063    | 0.15976242  | 2.646 | 1 |
| 5424 | BHMT   | ENST00000274353 | p.P265S  | c.793     | 0.15976242  | 0     | 1 |
| 5425 | MARK1  | ENST00000366917 | p.L76F   | c.228     | 0.00791607  | 0     | 1 |
| 5425 | MARK1  | ENST00000366917 | p.A139V  | c.416     | 0.00791607  | 6.981 | 1 |
| 5426 | CD180  | ENST00000256447 | p.L178M  | c.532     | 0.008912217 | 7.81  | 1 |
| 5426 | CD180  | ENST00000256447 | p.N228T  | c.683     | 1.004456108 | 0     | 2 |

|      |          |                 |          |        |             |       |   |
|------|----------|-----------------|----------|--------|-------------|-------|---|
| 5427 | SOS1     | ENST00000426016 | p.N585T  | c.1754 | 0.035255692 | 4.826 | 1 |
| 5427 | SOS1     | ENST00000426016 | p.R950I  | c.2849 | 0.035255692 | 0     | 1 |
| 5428 | DPYSL2   | ENST00000311151 | p.Q149H  | c.447  | 0.015646676 | 5.998 | 1 |
| 5428 | DPYSL2   | ENST00000311151 | p.E183K  | c.547  | 0.015646676 | 0     | 1 |
| 5429 | REG3A    | ENST00000305165 | p.G96A   | c.287  | 0.146352366 | 2.977 | 1 |
| 5429 | REG3A    | ENST00000305165 | p.N97K   | c.291  | 0.171644881 | 2.715 | 1 |
| 5429 | REG3A    | ENST00000305165 | p.R151K  | c.452  | 0.279310051 | 0     | 1 |
| 5430 | FXR1     | ENST00000357559 | p.V224A  | c.671  | 0.098686736 | 3.341 | 1 |
| 5430 | FXR1     | ENST00000357559 | p.F262L  | c.786  | 0.098686736 | 0     | 1 |
| 5431 | IL1RN    | ENST00000259206 | p.K99N   | c.297  | 0.192905141 | 2.411 | 1 |
| 5431 | IL1RN    | ENST00000259206 | p.E103K  | c.307  | 0.030831861 | 5.268 | 1 |
| 5431 | IL1RN    | ENST00000259206 | p.R125H  | c.374  | 0.213977657 | 0     | 1 |
| 5432 | HTRA1    | ENST00000368984 | p.D432N  | c.1294 | 0.021974894 | 5.508 | 1 |
| 5432 | HTRA1    | ENST00000368984 | p.I434T  | c.1301 | 0.024348893 | 5.36  | 1 |
| 5432 | HTRA1    | ENST00000368984 | p.I471F  | c.1411 | 0.046323787 | 0     | 1 |
| 5433 | CSAD     | ENST00000267085 | p.R106C  | c.316  | 0.013946046 | 0     | 1 |
| 5433 | CSAD     | ENST00000267085 | p.V150M  | c.448  | 0.013946046 | 6.164 | 1 |
| 5434 | MAT2A    | ENST00000306434 | p.R356C  | c.1066 | 0.174430041 | 0     | 1 |
| 5434 | MAT2A    | ENST00000306434 | p.D129Y  | c.385  | 0.131258871 | 2.999 | 1 |
| 5434 | MAT2A    | ENST00000306434 | p.P327L  | c.980  | 0.055515566 | 4.341 | 1 |
| 5435 | GSR      | ENST00000221130 | p.T413I  | c.1238 | 0.023864336 | 5.389 | 1 |
| 5435 | GSR      | ENST00000221130 | p.E438K  | c.1312 | 0.023864336 | 0     | 1 |
| 5436 | CALCRL   | ENST00000392370 | p.D55G   | c.164  | 0.030039404 | 5.057 | 1 |
| 5436 | CALCRL   | ENST00000392370 | p.D77N   | c.229  | 0.030039404 | 0     | 1 |
| 5437 | CLCNKA   | ENST00000331433 | p.A644T  | c.1930 | 0.013763584 | 6.183 | 1 |
| 5437 | CLCNKA   | ENST00000331433 | p.W670C  | c.2010 | 0.013763584 | 0     | 1 |
| 5438 | PCDH7    | ENST00000543491 | p.R372W  | c.1114 | 0.140048652 | 0     | 1 |
| 5438 | PCDH7    | ENST00000543491 | p.P323L  | c.968  | 0.140048652 | 2.836 | 1 |
| 5439 | DYRK2    | ENST00000344096 | p.M405L  | c.1213 | 0.101390894 | 4.302 | 1 |
| 5439 | DYRK2    | ENST00000344096 | p.R523H  | c.1568 | 1.050695447 | 0     | 2 |
| 5440 | SERPINE1 | ENST00000223095 | p.A119V  | c.356  | 0.144485838 | 2.791 | 1 |
| 5440 | SERPINE1 | ENST00000223095 | p.W162C  | c.486  | 0.144485838 | 0     | 1 |
| 5441 | CX3CL1   | ENST00000563383 | p.K44R   | c.131  | 0.023163547 | 0     | 1 |
| 5441 | CX3CL1   | ENST00000563383 | p.A68T   | c.202  | 0.023163547 | 5.432 | 1 |
| 5442 | DPYS     | ENST00000351513 | p.R394T  | c.1181 | 0.114387396 | 0     | 1 |
| 5442 | DPYS     | ENST00000351513 | p.D18N   | c.52   | 0.114387396 | 3.128 | 1 |
| 5443 | ASH1L    | ENST00000368346 | p.R2078C | c.6232 | 1.022112409 | 0     | 2 |
| 5443 | ASH1L    | ENST00000368346 | p.E2142G | c.6425 | 0.044224818 | 5.499 | 1 |
| 5444 | MLKL     | ENST00000308807 | p.K346R  | c.1037 | 0.154106541 | 0     | 1 |
| 5444 | MLKL     | ENST00000308807 | p.P260L  | c.779  | 0.154106541 | 2.698 | 1 |
| 5445 | APOBEC2  | ENST00000244669 | p.F56L   | c.166  | 0.040915416 | 4.689 | 1 |
| 5445 | APOBEC2  | ENST00000244669 | p.G88E   | c.263  | 0.006094764 | 7.985 | 1 |
| 5445 | APOBEC2  | ENST00000244669 | p.V187I  | c.559  | 0.042714804 | 0     | 1 |
| 5446 | EXO1     | ENST00000348581 | p.A98T   | c.292  | 0.006791754 | 7.202 | 1 |
| 5446 | EXO1     | ENST00000348581 | p.R121P  | c.362  | 0.006791754 | 0     | 1 |
| 5447 | SEMA7A   | ENST00000261918 | p.R167I  | c.500  | 0.004126116 | 7.921 | 1 |
| 5447 | SEMA7A   | ENST00000261918 | p.R204C  | c.610  | 0.004126116 | 0     | 1 |
| 5448 | CYTH2    | ENST00000427476 | p.V141L  | c.421  | 0.082126977 | 3.606 | 1 |
| 5448 | CYTH2    | ENST00000427476 | p.V192I  | c.574  | 0.082126977 | 0     | 1 |

|      |        |                 |                    |             |             |       |   |
|------|--------|-----------------|--------------------|-------------|-------------|-------|---|
| 5449 | TEAD2  | ENST00000598810 | p.S353F            | c.1058      | 0.009061716 | 6.786 | 1 |
| 5449 | TEAD2  | ENST00000598810 | p.V406I            | c.1216      | 0.009061716 | 0     | 1 |
| 5450 | KIT    | ENST00000288135 | p.Y418S            | c.1253      | 0.061341191 | 0     | 1 |
| 5450 | KIT    | ENST00000288135 | p.E490D            | c.1470      | 0.061341191 | 4.027 | 1 |
| 5451 | SH3GL3 | ENST00000324537 | p.N215K            | c.645       | 0.025050792 | 0     | 1 |
| 5451 | SH3GL3 | ENST00000324537 | p.R261Q            | c.782       | 0.025050792 | 5.319 | 1 |
| 5452 | NR5A2  | ENST00000367362 | p.R393Q            | c.1178      | 0.059705184 | 6.066 | 1 |
| 5452 | NR5A2  | ENST00000367362 | p.R439C            | c.1315      | 3.014926296 | 0     | 3 |
| 5452 | NR5A2  | ENST00000367362 | p.R439H            | c.1316      | 3.014926296 | 0     | 1 |
| 5453 | DNM1   | ENST00000372923 | p.E410Q            | c.1228      | 0.05739226  | 4.123 | 1 |
| 5453 | DNM1   | ENST00000372923 | p.M486I            | c.1458      | 0.05739226  | 0     | 1 |
| 5454 | OAS1   | ENST00000445409 | p.P167S            | c.499       | 0.011056204 | 6.499 | 1 |
| 5454 | OAS1   | ENST00000445409 | p.Y275C            | c.824       | 0.011056204 | 0     | 1 |
| 5455 | TOP2A  | ENST00000423485 | p.E884in_frame_del | c.2652_2650 | 0.0078125   | 0     | 1 |
| 5455 | TOP2A  | ENST00000423485 | p.L1016S           | c.3047      | 0.0078125   | 7     | 1 |
| 5456 | PANK1  | ENST00000307534 | p.E454Q            | c.1360      | 0.041607863 | 0     | 1 |
| 5456 | PANK1  | ENST00000307534 | p.M501I            | c.1503      | 0.041607863 | 4.587 | 1 |
| 5457 | CAPN9  | ENST00000271971 | p.H132Y            | c.394       | 0.026168953 | 0     | 1 |
| 5457 | CAPN9  | ENST00000271971 | p.E30Q             | c.88        | 0.026168953 | 5.256 | 1 |
| 5458 | GLS    | ENST00000320717 | p.V422M            | c.1264      | 0.011210543 | 0     | 1 |
| 5458 | GLS    | ENST00000320717 | p.L291F            | c.873       | 0.011210543 | 6.479 | 1 |
| 5459 | ITPA   | ENST00000380113 | p.I40M             | c.120       | 0.025524031 | 0     | 1 |
| 5459 | ITPA   | ENST00000380113 | p.V68M             | c.202       | 0.025524031 | 5.292 | 1 |
| 5461 | PTPRS  | ENST00000372412 | p.S46L             | c.137       | 0.015581738 | 0     | 1 |
| 5461 | PTPRS  | ENST00000372412 | p.C217R            | c.649       | 0.015581738 | 6.004 | 1 |
| 5462 | MEN1   | ENST00000394376 | p.E413Q            | c.1237      | 0.008206598 | 6.929 | 1 |
| 5462 | MEN1   | ENST00000394376 | p.A442D            | c.1325      | 0.008206598 | 0     | 1 |
| 5463 | DPP3   | ENST00000531863 | p.R698C            | c.2092      | 0.036778336 | 0     | 1 |
| 5463 | DPP3   | ENST00000531863 | p.R723C            | c.2167      | 0.036778336 | 4.765 | 1 |
| 5464 | AHCYL2 | ENST00000325006 | p.F368C            | c.1103      | 0.087899575 | 3.508 | 1 |
| 5464 | AHCYL2 | ENST00000325006 | p.F534C            | c.1601      | 0.087899575 | 0     | 1 |
| 5465 | APOH   | ENST00000205948 | p.R154C            | c.460       | 0.053883972 | 0     | 1 |
| 5465 | APOH   | ENST00000205948 | p.D184Y            | c.550       | 0.053883972 | 4.214 | 1 |
| 5466 | RELA   | ENST00000406246 | p.G208S            | c.622       | 0.076203443 | 0     | 1 |
| 5466 | RELA   | ENST00000406246 | p.P256L            | c.767       | 0.076203443 | 3.714 | 1 |
| 5467 | LMNB1  | ENST00000261366 | p.D450H            | c.1348      | 1.10628427  | 0     | 1 |
| 5467 | LMNB1  | ENST00000261366 | p.D450G            | c.1349      | 1.10628427  | 0     | 1 |
| 5467 | LMNB1  | ENST00000261366 | p.S520P            | c.1558      | 0.21256854  | 3.234 | 1 |
| 5468 | KIF15  | ENST00000326047 | p.A367V            | c.1100      | 0.007530702 | 0     | 1 |
| 5468 | KIF15  | ENST00000326047 | p.G329E            | c.986       | 0.007530702 | 7.053 | 1 |
| 5469 | SYTL4  | ENST00000454200 | p.V377I            | c.1129      | 0.007183985 | 7.121 | 1 |
| 5469 | SYTL4  | ENST00000454200 | p.R413G            | c.1237      | 0.007183985 | 0     | 1 |
| 5470 | SIRT5  | ENST00000606117 | p.L239R            | c.716       | 0.016886334 | 0     | 1 |
| 5470 | SIRT5  | ENST00000606117 | p.V269M            | c.805       | 0.016886334 | 5.888 | 1 |
| 5471 | DAPK1  | ENST00000358077 | p.V96I             | c.286       | 0.180866861 | 2.467 | 1 |
| 5471 | DAPK1  | ENST00000358077 | p.L148F            | c.444       | 0.180866861 | 0     | 1 |
| 5472 | MAF1   | ENST00000532522 | p.A153V            | c.458       | 0.072795849 | 3.78  | 1 |
| 5472 | MAF1   | ENST00000532522 | p.R28M             | c.83        | 0.072795849 | 0     | 1 |
| 5473 | KCNU1  | ENST00000399881 | p.P868S            | c.2602      | 0.002192815 | 0     | 1 |

|      |          |                 |                    |             |             |       |   |
|------|----------|-----------------|--------------------|-------------|-------------|-------|---|
| 5473 | KCNU1    | ENST00000399881 | p.L891I            | c.2671      | 0.002192815 | 8.833 | 1 |
| 5474 | BIRC6    | ENST00000421745 | p.T4539M           | c.13616     | 0.063240825 | 3.983 | 1 |
| 5474 | BIRC6    | ENST00000421745 | p.C4770Y           | c.14309     | 0.063240825 | 0     | 1 |
| 5475 | C5       | ENST00000223642 | p.Y501D            | c.1501      | 0.040470094 | 4.627 | 1 |
| 5475 | C5       | ENST00000223642 | p.Y543C            | c.1628      | 0.040470094 | 0     | 1 |
| 5476 | VPS4B    | ENST00000238497 | p.A37D             | c.110       | 0.243838865 | 2.036 | 1 |
| 5476 | VPS4B    | ENST00000238497 | p.L14M             | c.40        | 0.243838865 | 0     | 1 |
| 5477 | DPYSL5   | ENST00000288699 | p.K480in_frame_del | c.1436_1438 | 0.009929935 | 0     | 1 |
| 5477 | DPYSL5   | ENST00000288699 | p.W136C            | c.408       | 0.009929935 | 6.654 | 1 |
| 5478 | FBXL3    | ENST00000355619 | p.R256H            | c.767       | 0.023683071 | 0     | 1 |
| 5478 | FBXL3    | ENST00000355619 | p.F294V            | c.880       | 0.023683071 | 5.4   | 1 |
| 5479 | GOLPH3   | ENST00000265070 | p.I85V             | c.253       | 1.018958649 | 0     | 1 |
| 5479 | GOLPH3   | ENST00000265070 | p.I85M             | c.255       | 1.018958649 | 0     | 1 |
| 5479 | GOLPH3   | ENST00000265070 | p.D247Y            | c.739       | 0.037917299 | 5.721 | 1 |
| 5480 | SELP     | ENST00000263686 | p.R63C             | c.187       | 0.013499034 | 6.211 | 1 |
| 5480 | SELP     | ENST00000263686 | p.E199D            | c.597       | 0.013499034 | 0     | 1 |
| 5481 | IL17RA   | ENST00000319363 | p.A214V            | c.641       | 0.007463148 | 7.066 | 1 |
| 5481 | IL17RA   | ENST00000319363 | p.E247Q            | c.739       | 0.010005936 | 6.643 | 1 |
| 5481 | IL17RA   | ENST00000319363 | p.R271C            | c.811       | 0.017469084 | 0     | 1 |
| 5482 | NAALAD2  | ENST00000534061 | p.L249F            | c.747       | 0.148373028 | 0     | 1 |
| 5482 | NAALAD2  | ENST00000534061 | p.G278E            | c.833       | 0.103981073 | 3.335 | 1 |
| 5482 | NAALAD2  | ENST00000534061 | p.P280L            | c.839       | 0.054158067 | 4.343 | 1 |
| 5483 | BPIFA1   | ENST00000375413 | p.R128S            | c.382       | 0.077267204 | 0     | 1 |
| 5483 | BPIFA1   | ENST00000375413 | p.I163M            | c.489       | 0.077267204 | 3.694 | 1 |
| 5484 | TDP1     | ENST00000393454 | p.D230N            | c.688       | 0.019437682 | 0     | 1 |
| 5484 | TDP1     | ENST00000393454 | p.A253T            | c.757       | 0.019437682 | 5.685 | 1 |
| 5485 | GOT1     | ENST00000370508 | p.G392D            | c.1175      | 0.014004167 | 0     | 1 |
| 5485 | GOT1     | ENST00000370508 | p.T43M             | c.128       | 0.014004167 | 6.158 | 1 |
| 5486 | AHCY     | ENST00000217426 | p.E341K            | c.1021      | 0.089374062 | 3.484 | 1 |
| 5486 | AHCY     | ENST00000217426 | p.V308I            | c.922       | 0.089374062 | 0     | 1 |
| 5487 | ACHE     | ENST00000411582 | p.V176E            | c.527       | 0.013294746 | 0     | 1 |
| 5487 | ACHE     | ENST00000411582 | p.A219T            | c.655       | 0.013294746 | 6.233 | 1 |
| 5488 | MBTD1    | ENST00000415868 | p.H490D            | c.1468      | 0.053437636 | 0     | 1 |
| 5488 | MBTD1    | ENST00000415868 | p.R520S            | c.1558      | 0.053437636 | 4.226 | 1 |
| 5489 | UBA3     | ENST00000361055 | p.E251V            | c.752       | 0.163912752 | 2.609 | 1 |
| 5489 | UBA3     | ENST00000361055 | p.R308I            | c.923       | 0.163912752 | 0     | 1 |
| 5490 | POR      | ENST00000447222 | p.D698V            | c.2093      | 0.0233085   | 5.423 | 1 |
| 5491 | SERPINE1 | ENST00000223095 | p.G39W             | c.115       | 0.016187231 | 0     | 1 |
| 5491 | SERPINE1 | ENST00000223095 | p.G61R             | c.181       | 0.016187231 | 5.949 | 1 |
| 5492 | SNF8     | ENST00000502492 | p.K44N             | c.132       | 0.191179535 | 3.387 | 1 |
| 5492 | SNF8     | ENST00000502492 | p.F86L             | c.256       | 1.095589767 | 0     | 1 |
| 5492 | SNF8     | ENST00000502492 | p.F86C             | c.257       | 1.095589767 | 0     | 1 |
| 5493 | TTN      | ENST00000589042 | p.E33106K          | c.99316     | 0.011140826 | 6.488 | 1 |
| 5493 | TTN      | ENST00000589042 | p.S33186N          | c.99557     | 0.011140826 | 0     | 1 |
| 5494 | RAD1     | ENST00000382038 | p.V152F            | c.454       | 0.402483069 | 2.313 | 1 |
| 5494 | RAD1     | ENST00000382038 | p.R244W            | c.730       | 1.201241534 | 0     | 2 |
| 5495 | FBXO4    | ENST00000281623 | p.L378I            | c.1132      | 0.0048359   | 7.692 | 1 |
| 5495 | FBXO4    | ENST00000281623 | p.N175S            | c.524       | 0.0048359   | 0     | 1 |
| 5496 | ME2      | ENST00000321341 | p.Q338H            | c.1014      | 0.087595466 | 0     | 1 |

|             |                 |          |         |             |       |   |
|-------------|-----------------|----------|---------|-------------|-------|---|
| 5496 ME2    | ENST00000321341 | p.F365C  | c.1094  | 0.087595466 | 3.513 | 1 |
| 5497 PAPSS2 | ENST00000456849 | p.A61V   | c.182   | 0.005093948 | 7.617 | 1 |
| 5497 PAPSS2 | ENST00000456849 | p.H204Q  | c.612   | 0.005093948 | 0     | 1 |
| 5498 BIRC6  | ENST00000421745 | p.E4526K | c.13576 | 0.070707154 | 3.822 | 1 |
| 5498 BIRC6  | ENST00000421745 | p.N4682K | c.14046 | 0.070707154 | 0     | 1 |
| 5499 RBBP9  | ENST00000337227 | p.S76F   | c.227   | 0.007243989 | 7.109 | 1 |
| 5499 RBBP9  | ENST00000337227 | p.A98V   | c.293   | 0.016935921 | 0     | 1 |
| 5499 RBBP9  | ENST00000337227 | p.W143S  | c.428   | 0.009691932 | 6.689 | 1 |
| 5500 DAO    | ENST00000228476 | p.D46N   | c.136   | 0.063065727 | 3.987 | 1 |
| 5500 DAO    | ENST00000228476 | p.G141E  | c.422   | 0.063065727 | 0     | 1 |
| 5501 SYT13  | ENST00000020926 | p.K161R  | c.482   | 0.245364766 | 2.027 | 1 |
| 5501 SYT13  | ENST00000020926 | p.E276K  | c.826   | 0.245364766 | 0     | 1 |
| 5502 HDAC7  | ENST00000380610 | p.R787C  | c.2359  | 0.132310549 | 2.918 | 1 |
| 5502 HDAC7  | ENST00000380610 | p.A864T  | c.2590  | 0.132310549 | 0     | 1 |
| 5503 CETN2  | ENST00000370277 | p.L39I   | c.115   | 0.019276675 | 5.697 | 1 |
| 5503 CETN2  | ENST00000370277 | p.R16Q   | c.47    | 0.019276675 | 0     | 1 |
| 5504 EIF4A3 | ENST00000269349 | p.L354F  | c.1060  | 0.067405027 | 3.891 | 1 |
| 5504 EIF4A3 | ENST00000269349 | p.R387H  | c.1160  | 0.067405027 | 0     | 1 |
| 5505 DDX6   | ENST00000264018 | p.G397D  | c.1190  | 0.015399208 | 6.021 | 1 |
| 5505 DDX6   | ENST00000264018 | p.E302D  | c.906   | 0.015399208 | 0     | 1 |
| 5506 PARN   | ENST00000437198 | p.P132L  | c.395   | 0.085023178 | 3.556 | 1 |
| 5506 PARN   | ENST00000437198 | p.D266Y  | c.796   | 0.085023178 | 0     | 1 |
| 5507 LTF    | ENST00000231751 | p.S439I  | c.1316  | 0.074376981 | 0     | 1 |
| 5507 LTF    | ENST00000231751 | p.Q571H  | c.1713  | 0.074376981 | 3.749 | 1 |
| 5508 CFB    | ENST00000556679 | p.S780T  | c.2338  | 0.12869251  | 2.958 | 1 |
| 5508 CFB    | ENST00000556679 | p.S853L  | c.2558  | 0.12869251  | 0     | 1 |
| 5509 BIRC5  | ENST00000301633 | p.P52Q   | c.155   | 0.020948634 | 0     | 1 |
| 5509 BIRC5  | ENST00000301633 | p.K23E   | c.67    | 0.020948634 | 5.577 | 1 |
| 5510 LGR4   | ENST00000379214 | p.R156W  | c.466   | 1.153573373 | 0     | 2 |
| 5510 LGR4   | ENST00000379214 | p.Q180R  | c.539   | 0.307146745 | 2.703 | 1 |
| 5511 CA4    | ENST00000300900 | p.V38A   | c.113   | 0.013030173 | 0     | 1 |
| 5511 CA4    | ENST00000300900 | p.V170G  | c.509   | 0.013030173 | 6.262 | 1 |
| 5512 PGC    | ENST00000373025 | p.P82S   | c.244   | 0.028716028 | 5.122 | 1 |
| 5512 PGC    | ENST00000373025 | p.S121F  | c.362   | 0.028716028 | 0     | 1 |
| 5513 PGR    | ENST00000325455 | p.D709E  | c.2127  | 0.34820287  | 2.522 | 1 |
| 5513 PGR    | ENST00000325455 | p.R788G  | c.2362  | 1.174101435 | 0     | 1 |
| 5513 PGR    | ENST00000325455 | p.R788W  | c.2362  | 1.174101435 | 0     | 1 |
| 5514 NOS2   | ENST00000313735 | p.L423I  | c.1267  | 0.009264957 | 6.754 | 1 |
| 5514 NOS2   | ENST00000313735 | p.E332K  | c.994   | 0.009264957 | 0     | 1 |
| 5515 CHAT   | ENST00000337653 | p.A533T  | c.1597  | 0.017689045 | 5.821 | 1 |
| 5515 CHAT   | ENST00000337653 | p.R605C  | c.1813  | 0.017689045 | 0     | 1 |
| 5516 PPIG   | ENST00000260970 | p.S89F   | c.266   | 0.102450576 | 0     | 1 |
| 5516 PPIG   | ENST00000260970 | p.G121D  | c.362   | 0.102450576 | 3.287 | 1 |
| 5517 TDRD3  | ENST00000196169 | p.R574Q  | c.1721  | 0.012318753 | 6.343 | 1 |
| 5517 TDRD3  | ENST00000196169 | p.G595R  | c.1783  | 0.012318753 | 0     | 1 |
| 5518 INTS3  | ENST00000318967 | p.R346H  | c.1037  | 1.094208432 | 0     | 2 |
| 5518 INTS3  | ENST00000318967 | p.S389F  | c.1166  | 0.188416864 | 3.408 | 1 |
| 5519 HBB    | ENST00000335295 | p.P37A   | c.109   | 0.075102253 | 0     | 1 |
| 5519 HBB    | ENST00000335295 | p.P101S  | c.301   | 0.075102253 | 3.735 | 1 |

|      |         |                 |          |         |             |       |   |
|------|---------|-----------------|----------|---------|-------------|-------|---|
| 5520 | GLIPR2  | ENST00000377960 | p.W109L  | c.326   | 0.081333866 | 0     | 1 |
| 5520 | GLIPR2  | ENST00000377960 | p.V149I  | c.445   | 0.081333866 | 3.62  | 1 |
| 5521 | TNFSF18 | ENST00000404377 | p.K90N   | c.270   | 0.033492921 | 4.9   | 1 |
| 5521 | TNFSF18 | ENST00000404377 | p.M145I  | c.435   | 0.033492921 | 0     | 1 |
| 5522 | PRKCG   | ENST00000540413 | p.S35N   | c.104   | 0.043015488 | 5.539 | 1 |
| 5522 | PRKCG   | ENST00000540413 | p.E79K   | c.235   | 1.021507744 | 0     | 2 |
| 5523 | MMP2    | ENST00000570308 | p.N209K  | c.627   | 0.011533706 | 0     | 1 |
| 5523 | MMP2    | ENST00000570308 | p.R234C  | c.700   | 0.011533706 | 6.438 | 1 |
| 5524 | CDT1    | ENST00000301019 | p.R198L  | c.593   | 0.014219357 | 0     | 1 |
| 5524 | CDT1    | ENST00000301019 | p.Y247D  | c.739   | 0.014219357 | 6.136 | 1 |
| 5525 | BCR     | ENST00000305877 | p.F7L    | c.18_19 | 0.004944362 | 7.66  | 1 |
| 5525 | BCR     | ENST00000305877 | p.A64G   | c.191   | 0.004944362 | 0     | 1 |
| 5526 | SPTBN1  | ENST00000356805 | p.E1725K | c.5173  | 0.053142135 | 0     | 1 |
| 5526 | SPTBN1  | ENST00000356805 | p.L1801I | c.5401  | 0.053142135 | 4.234 | 1 |
| 5527 | CNOT1   | ENST00000317147 | p.R2263C | c.6787  | 1.045879707 | 0     | 1 |
| 5527 | CNOT1   | ENST00000317147 | p.R2263H | c.6788  | 1.045879707 | 0     | 1 |
| 5527 | CNOT1   | ENST00000317147 | p.T2297M | c.6890  | 0.091759415 | 4.446 | 1 |
| 5528 | STK10   | ENST00000176763 | p.L85P   | c.254   | 0.013975077 | 6.161 | 1 |
| 5528 | STK10   | ENST00000176763 | p.A174S  | c.520   | 0.013975077 | 0     | 1 |
| 5529 | ACADSB  | ENST00000358776 | p.D238N  | c.712   | 0.01170282  | 6.417 | 1 |
| 5529 | ACADSB  | ENST00000358776 | p.H245Y  | c.733   | 0.015082297 | 6.051 | 1 |
| 5529 | ACADSB  | ENST00000358776 | p.V268I  | c.802   | 0.026785117 | 0     | 1 |
| 5530 | CYP7A1  | ENST00000301645 | p.H136Q  | c.408   | 0.028242273 | 0     | 1 |
| 5530 | CYP7A1  | ENST00000301645 | p.S258R  | c.774   | 0.028242273 | 5.146 | 1 |
| 5531 | QKI     | ENST00000361752 | p.Y57H   | c.169   | 0.130878252 | 0     | 1 |
| 5531 | QKI     | ENST00000361752 | p.Q112P  | c.335   | 0.055525041 | 4.281 | 1 |
| 5531 | QKI     | ENST00000361752 | p.E174K  | c.520   | 0.08352575  | 3.654 | 1 |
| 5532 | CPA1    | ENST00000011292 | p.R181L  | c.542   | 0.136313467 | 2.875 | 1 |
| 5532 | CPA1    | ENST00000011292 | p.R234H  | c.701   | 0.136313467 | 0     | 1 |
| 5533 | RTF1    | ENST00000389629 | p.R401W  | c.1201  | 0.072745408 | 3.781 | 1 |
| 5533 | RTF1    | ENST00000389629 | p.F447I  | c.1339  | 0.072745408 | 0     | 1 |
| 5534 | TPRKB   | ENST00000318190 | p.L42M   | c.124   | 0.077428044 | 3.691 | 1 |
| 5534 | TPRKB   | ENST00000318190 | p.L145V  | c.433   | 0.077428044 | 0     | 1 |
| 5535 | RHOC    | ENST00000369638 | p.D120N  | c.358   | 0.080772052 | 3.63  | 1 |
| 5535 | RHOC    | ENST00000369638 | p.K162N  | c.486   | 0.080772052 | 0     | 1 |
| 5536 | DPYS    | ENST00000351513 | p.W360L  | c.1079  | 0.019478144 | 5.682 | 1 |
| 5536 | DPYS    | ENST00000351513 | p.D407N  | c.1219  | 0.019478144 | 0     | 1 |
| 5537 | NCAM2   | ENST00000400546 | p.K643R  | c.1928  | 0.027988927 | 0     | 1 |
| 5537 | NCAM2   | ENST00000400546 | p.Y674C  | c.2021  | 0.027988927 | 5.159 | 1 |
| 5538 | GSTM2   | ENST00000369831 | p.D106N  | c.316   | 0.016827912 | 6.893 | 1 |
| 5538 | GSTM2   | ENST00000369831 | p.V163I  | c.487   | 1.008413956 | 0     | 1 |
| 5538 | GSTM2   | ENST00000369831 | p.V163A  | c.488   | 1.008413956 | 0     | 1 |
| 5539 | CR1     | ENST00000367052 | p.G1343R | c.4027  | 1.016345077 | 0     | 1 |
| 5539 | CR1     | ENST00000367052 | p.G1343E | c.4028  | 1.016345077 | 0     | 1 |
| 5539 | CR1     | ENST00000367052 | p.R1369S | c.4105  | 0.032690154 | 5.935 | 1 |
| 5540 | FLNC    | ENST00000325888 | p.V571M  | c.1711  | 0.056016669 | 0     | 1 |
| 5540 | FLNC    | ENST00000325888 | p.R650P  | c.1949  | 0.056016669 | 4.158 | 1 |
| 5541 | C5      | ENST00000223642 | p.R835Q  | c.2504  | 0.065652784 | 0     | 1 |
| 5541 | C5      | ENST00000223642 | p.P931S  | c.2791  | 0.065652784 | 3.929 | 1 |

|      |         |                 |                     |             |             |       |   |
|------|---------|-----------------|---------------------|-------------|-------------|-------|---|
| 5542 | NFATC2  | ENST00000396009 | p.K497E             | c.1489      | 0.008149911 | 0     | 1 |
| 5542 | NFATC2  | ENST00000396009 | p.I518T             | c.1553      | 0.008149911 | 6.939 | 1 |
| 5543 | POLK    | ENST00000241436 | p.D109N             | c.325       | 0.150308656 | 2.734 | 1 |
| 5543 | POLK    | ENST00000241436 | p.N330D             | c.988       | 0.150308656 | 0     | 1 |
| 5544 | PTPRG   | ENST00000474889 | p.P85A              | c.253       | 0.022235367 | 0     | 1 |
| 5544 | PTPRG   | ENST00000474889 | p.R311H             | c.932       | 0.022235367 | 5.491 | 1 |
| 5545 | GUCY1B3 | ENST00000502959 | p.K437R             | c.1310      | 0.039885274 | 4.648 | 1 |
| 5545 | GUCY1B3 | ENST00000502959 | p.P508L             | c.1523      | 0.039885274 | 0     | 1 |
| 5547 | TLR8    | ENST00000311912 | p.F260L             | c.780       | 0.010679589 | 6.549 | 1 |
| 5547 | TLR8    | ENST00000311912 | p.Q302E             | c.904       | 0.010679589 | 0     | 1 |
| 5548 | MGAM    | ENST00000475668 | p.G1430E            | c.4289      | 0.090370768 | 3.468 | 1 |
| 5548 | MGAM    | ENST00000475668 | p.L1462V            | c.4384      | 0.090370768 | 0     | 1 |
| 5549 | MSH6    | ENST00000234420 | p.E1254in_frame_del | c.3759_3761 | 0.13221887  | 0     | 1 |
| 5549 | MSH6    | ENST00000234420 | p.R1331Q            | c.3992      | 0.13221887  | 2.919 | 1 |
| 5550 | NXF1    | ENST00000532297 | p.R344Q             | c.1031      | 0.070218744 | 3.832 | 1 |
| 5550 | NXF1    | ENST00000532297 | p.R307W             | c.919       | 0.070218744 | 0     | 1 |
| 5551 | DNMT3A  | ENST00000321117 | p.G685E             | c.2054      | 0.01053959  | 8.153 | 1 |
| 5551 | DNMT3A  | ENST00000321117 | p.R729W             | c.2185      | 2.003513197 | 0     | 1 |
| 5551 | DNMT3A  | ENST00000321117 | p.R729Q             | c.2186      | 2.003513197 | 0     | 2 |
| 5552 | RALGPS1 | ENST00000259351 | p.R96Q              | c.287       | 0.031752192 | 0     | 1 |
| 5552 | RALGPS1 | ENST00000259351 | p.I268L             | c.802       | 0.031752192 | 4.977 | 1 |
| 5553 | BROX    | ENST00000340934 | p.P206N             | c.616_617   | 0.011117683 | 0     | 1 |
| 5553 | BROX    | ENST00000340934 | p.L261V             | c.781       | 0.011117683 | 6.491 | 1 |
| 5554 | EXOSC8  | ENST00000389704 | p.N55K              | c.165       | 0.00221727  | 8.817 | 1 |
| 5554 | EXOSC8  | ENST00000389704 | p.S90L              | c.269       | 0.00221727  | 0     | 1 |
| 5555 | CNOT1   | ENST00000317147 | p.P906S             | c.2716      | 0.016209687 | 0     | 1 |
| 5555 | CNOT1   | ENST00000317147 | p.M950I             | c.2850      | 0.016209687 | 5.947 | 1 |
| 5556 | ADH1A   | ENST00000209668 | p.R38C              | c.112       | 0.050485049 | 0     | 1 |
| 5556 | ADH1A   | ENST00000209668 | p.V74M              | c.220       | 0.050485049 | 4.308 | 1 |
| 5557 | FN1     | ENST00000354785 | p.S739F             | c.2216      | 0.130488991 | 0     | 1 |
| 5557 | FN1     | ENST00000354785 | p.L803M             | c.2407      | 0.130488991 | 2.938 | 1 |
| 5558 | HBD     | ENST00000380299 | p.V114L             | c.340       | 0.064838746 | 3.947 | 1 |
| 5558 | HBD     | ENST00000380299 | p.K18N              | c.54        | 0.064838746 | 0     | 1 |
| 5559 | UBE2Q1  | ENST00000292211 | p.S249L             | c.746       | 0.01268265  | 7.301 | 1 |
| 5559 | UBE2Q1  | ENST00000292211 | p.E277K             | c.829       | 1.006341325 | 0     | 2 |
| 5560 | CRYGD   | ENST00000264376 | p.N125K             | c.375       | 0.164140141 | 0     | 1 |
| 5560 | CRYGD   | ENST00000264376 | p.D150E             | c.450       | 0.164140141 | 2.607 | 1 |
| 5561 | QSOX1   | ENST00000367602 | p.R344L             | c.1031      | 0.041521432 | 0     | 1 |
| 5561 | QSOX1   | ENST00000367602 | p.L384P             | c.1151      | 0.041521432 | 4.59  | 1 |
| 5562 | ENO1    | ENST00000234590 | p.A74V              | c.221       | 0.016550286 | 0     | 1 |
| 5562 | ENO1    | ENST00000234590 | p.I3V               | c.7         | 0.016550286 | 5.917 | 1 |
| 5563 | CYP27A1 | ENST00000258415 | p.N519S             | c.1556      | 0.037447157 | 0     | 1 |
| 5563 | CYP27A1 | ENST00000258415 | p.A206T             | c.616       | 0.037447157 | 4.739 | 1 |
| 5564 | PDK3    | ENST00000441463 | p.A127T             | c.379       | 0.025365299 | 5.301 | 1 |
| 5564 | PDK3    | ENST00000441463 | p.F324L             | c.970       | 0.025365299 | 0     | 1 |
| 5565 | GRIA2   | ENST00000296526 | p.G84R              | c.250       | 0.0465847   | 0     | 1 |
| 5565 | GRIA2   | ENST00000296526 | p.Q28H              | c.84        | 0.0465847   | 4.424 | 1 |
| 5566 | RERG    | ENST00000256953 | p.R70K              | c.209       | 0.068298609 | 0     | 1 |
| 5566 | RERG    | ENST00000256953 | p.L98R              | c.293       | 0.068298609 | 3.872 | 1 |



|      |          |                 |          |             |             |       |   |
|------|----------|-----------------|----------|-------------|-------------|-------|---|
| 5567 | PTPRF    | ENST00000359947 | p.N921K  | c.2763      | 0.009565128 | 6.708 | 1 |
| 5567 | PTPRF    | ENST00000359947 | p.D970H  | c.2908      | 0.009565128 | 0     | 1 |
| 5568 | TRNT1    | ENST00000251607 | p.D152Y  | c.454       | 0.008138621 | 6.941 | 1 |
| 5568 | TRNT1    | ENST00000251607 | p.E241Q  | c.721       | 0.008138621 | 0     | 1 |
| 5569 | PTRH2    | ENST00000393038 | p.M67I   | c.201       | 0.03184035  | 0     | 1 |
| 5569 | PTRH2    | ENST00000393038 | p.A89V   | c.266       | 0.03184035  | 4.973 | 1 |
| 5570 | OTUB2    | ENST00000203664 | p.K94R   | c.281       | 0.033169475 | 4.914 | 1 |
| 5570 | OTUB2    | ENST00000203664 | p.L137V  | c.409       | 0.033169475 | 0     | 1 |
| 5571 | ACTN2    | ENST00000542672 | p.R442L  | c.1325      | 0.005406835 | 0     | 1 |
| 5571 | ACTN2    | ENST00000542672 | p.E520K  | c.1558      | 0.005406835 | 7.531 | 1 |
| 5572 | NFKB1    | ENST00000226574 | p.R57C   | c.169       | 0.03569832  | 4.808 | 1 |
| 5572 | NFKB1    | ENST00000226574 | p.A245T  | c.733       | 0.03569832  | 0     | 1 |
| 5573 | RPSA     | ENST00000443003 | p.K11R   | c.32        | 0.155286035 | 3.687 | 1 |
| 5573 | RPSA     | ENST00000443003 | p.R196C  | c.586       | 1.077643018 | 0     | 1 |
| 5573 | RPSA     | ENST00000443003 | p.R196H  | c.587       | 1.077643018 | 0     | 1 |
| 5574 | CAND1    | ENST00000545606 | p.C942Y  | c.2825      | 0.118175265 | 0     | 1 |
| 5574 | CAND1    | ENST00000545606 | p.Y980N  | c.2938      | 0.118175265 | 3.081 | 1 |
| 5576 | MC4R     | ENST00000299766 | p.D37N   | c.109       | 0.028537445 | 0     | 1 |
| 5576 | MC4R     | ENST00000299766 | p.A114V  | c.341       | 0.028537445 | 5.131 | 1 |
| 5577 | TEK      | ENST00000380036 | p.G292S  | c.874       | 0.157453747 | 0     | 1 |
| 5577 | TEK      | ENST00000380036 | p.R325H  | c.974       | 0.157453747 | 2.667 | 1 |
| 5578 | ICAM1    | ENST00000264832 | p.Q257H  | c.771       | 0.008722758 | 0     | 1 |
| 5578 | ICAM1    | ENST00000264832 | p.R287Q  | c.860       | 0.008722758 | 6.841 | 1 |
| 5579 | PRDX2    | ENST00000301522 | p.L45V   | c.133       | 0.003079688 | 8.343 | 1 |
| 5579 | PRDX2    | ENST00000301522 | p.G94E   | c.281       | 0.003079688 | 0     | 1 |
| 5580 | C6       | ENST00000263413 | p.K387N  | c.1161      | 0.16539643  | 2.596 | 1 |
| 5580 | C6       | ENST00000263413 | p.D558N  | c.1672      | 0.16539643  | 0     | 1 |
| 5581 | TYW5     | ENST00000354611 | p.F137L  | c.411       | 0.010964623 | 6.511 | 1 |
| 5581 | TYW5     | ENST00000354611 | p.F228L  | c.682       | 0.010964623 | 0     | 1 |
| 5582 | FBXL3    | ENST00000355619 | p.L189V  | c.565       | 0.007114608 | 7.135 | 1 |
| 5582 | FBXL3    | ENST00000355619 | p.L217I  | c.649       | 0.007114608 | 0     | 1 |
| 5583 | GNB1     | ENST00000378609 | p.K57T   | c.170       | 0.014268723 | 6.131 | 1 |
| 5583 | GNB1     | ENST00000378609 | p.S316G  | c.946       | 0.014268723 | 0     | 1 |
| 5584 | HMGCR    | ENST00000287936 | p.S580R  | c.1740      | 0.015854102 | 5.979 | 1 |
| 5584 | HMGCR    | ENST00000287936 | p.R840Q  | c.2519      | 0.015854102 | 0     | 1 |
| 5586 | CYP7A1   | ENST00000301645 | p.L346F  | c.1038      | 0.068062313 | 3.877 | 1 |
| 5586 | CYP7A1   | ENST00000301645 | p.I459F  | c.1375      | 0.068062313 | 0     | 1 |
| 5587 | CYP21A2  | ENST00000418967 | p.R342W  | c.1024      | 0.054221168 | 0     | 1 |
| 5587 | CYP21A2  | ENST00000418967 | p.E321K  | c.961       | 0.054221168 | 4.205 | 1 |
| 5588 | SNRNP200 | ENST00000323853 | p.V1949F | c.5845      | 0.013193764 | 6.244 | 1 |
| 5588 | SNRNP200 | ENST00000323853 | p.A2112T | c.6334      | 0.013193764 | 0     | 1 |
| 5589 | L3MBTL3  | ENST00000361794 | p.K506E  | c.1516      | 0.108894274 | 3.199 | 1 |
| 5589 | L3MBTL3  | ENST00000361794 | p.H528Y  | c.1582      | 0.108894274 | 0     | 1 |
| 5590 | TBC1D22A | ENST00000337137 | p.I334V  | c.1000      | 0.003634569 | 8.104 | 1 |
| 5590 | TBC1D22A | ENST00000337137 | p.K297N  | c.891       | 0.003634569 | 0     | 1 |
| 5591 | USP14    | ENST00000261601 | p.A200V  | c.599       | 0.010117523 | 0     | 1 |
| 5591 | USP14    | ENST00000261601 | p.R330Q  | c.989       | 0.010117523 | 6.627 | 1 |
| 5593 | ABCB10   | ENST00000344517 | p.S583Y  | c.1748      | 0.006350122 | 0     | 1 |
| 5593 | ABCB10   | ENST00000344517 | p.Q621K  | c.1861_1860 | 0.006350122 | 7.299 | 1 |

|              |                 |          |             |             |       |   |
|--------------|-----------------|----------|-------------|-------------|-------|---|
| 5594 CHKA    | ENST00000265689 | p.F98C   | c.293       | 0.013480334 | 0     | 1 |
| 5594 CHKA    | ENST00000265689 | p.E175D  | c.525       | 0.013480334 | 6.213 | 1 |
| 5595 CLIC2   | ENST00000369449 | p.S169F  | c.506       | 0.200684347 | 3.317 | 1 |
| 5595 CLIC2   | ENST00000369449 | p.R214C  | c.640       | 1.100342174 | 0     | 1 |
| 5595 CLIC2   | ENST00000369449 | p.R214H  | c.641       | 1.100342174 | 0     | 1 |
| 5596 DPYSL3  | ENST00000343218 | p.E474D  | c.1422      | 0.015832139 | 5.981 | 1 |
| 5596 DPYSL3  | ENST00000343218 | p.S535F  | c.1604      | 0.015832139 | 0     | 1 |
| 5597 PHF6    | ENST00000394292 | p.C293S  | c.878       | 0.009868182 | 6.663 | 1 |
| 5597 PHF6    | ENST00000394292 | p.K300N  | c.900       | 0.097328086 | 3.361 | 1 |
| 5597 PHF6    | ENST00000394292 | p.N329Y  | c.985       | 0.107196268 | 0     | 1 |
| 5598 RRM2    | ENST00000360566 | p.E207Q  | c.619       | 0.00964502  | 0     | 1 |
| 5598 RRM2    | ENST00000360566 | p.R284H  | c.851       | 0.00964502  | 6.696 | 1 |
| 5600 GCKR    | ENST00000264717 | p.R478L  | c.1433      | 0.01283298  | 0     | 1 |
| 5600 GCKR    | ENST00000264717 | p.K267N  | c.801       | 0.01283298  | 6.284 | 1 |
| 5601 PYGM    | ENST00000164139 | p.V60M   | c.178       | 0.101884042 | 0     | 1 |
| 5601 PYGM    | ENST00000164139 | p.T99I   | c.296       | 0.101884042 | 3.295 | 1 |
| 5602 S100A1  | ENST00000368698 | p.K81N   | c.243       | 0.375009747 | 0     | 1 |
| 5602 S100A1  | ENST00000368698 | p.D124N  | c.370       | 0.375009747 | 1.415 | 1 |
| 5603 SEC24A  | ENST00000398844 | p.V996L  | c.2986      | 0.056250121 | 0     | 1 |
| 5603 SEC24A  | ENST00000398844 | p.E1058K | c.3172      | 0.056250121 | 4.152 | 1 |
| 5604 ERBB3   | ENST00000267101 | p.V593A  | c.1778      | 0.018198962 | 0     | 1 |
| 5604 ERBB3   | ENST00000267101 | p.V264A  | c.791       | 0.018198962 | 5.78  | 1 |
| 5605 MMP10   | ENST00000279441 | p.Y115C  | c.344       | 0.161096829 | 2.634 | 1 |
| 5605 MMP10   | ENST00000279441 | p.L151Q  | c.452       | 0.161096829 | 0     | 1 |
| 5606 HECW1   | ENST00000395891 | p.A954V  | c.2861      | 0.091188772 | 3.455 | 1 |
| 5606 HECW1   | ENST00000395891 | p.F997Y  | c.2990      | 0.091188772 | 0     | 1 |
| 5607 EPB41L3 | ENST00000342933 | p.F151S  | c.452       | 0.068488235 | 0     | 1 |
| 5607 EPB41L3 | ENST00000342933 | p.K187T  | c.560       | 0.068488235 | 3.868 | 1 |
| 5609 ASRGL1  | ENST00000415229 | p.G66R   | c.196       | 0.035896824 | 0     | 1 |
| 5609 ASRGL1  | ENST00000415229 | p.R147C  | c.439       | 0.035896824 | 4.8   | 1 |
| 5610 HCK     | ENST00000375852 | p.H93Q   | c.279       | 0.178872065 | 0     | 1 |
| 5610 HCK     | ENST00000375852 | p.Y127F  | c.380       | 0.178872065 | 2.483 | 1 |
| 5611 FLT1    | ENST00000282397 | p.S1014P | c.3040      | 1.008999122 | 0     | 1 |
| 5611 FLT1    | ENST00000282397 | p.S1014F | c.3041      | 1.008999122 | 0     | 1 |
| 5611 FLT1    | ENST00000282397 | p.R1146I | c.3437      | 0.017998244 | 6.796 | 1 |
| 5612 XCL1    | ENST00000367818 | p.T49S   | c.146       | 0.024637505 | 0     | 1 |
| 5612 XCL1    | ENST00000367818 | p.V81I   | c.241       | 0.024637505 | 5.343 | 1 |
| 5613 HDC     | ENST00000267845 | p.G68V   | c.203       | 0.063504384 | 0     | 1 |
| 5613 HDC     | ENST00000267845 | p.S109I  | c.326       | 0.063504384 | 3.977 | 1 |
| 5614 MTERFD2 | ENST00000391980 | p.D101H  | c.301       | 0.003690418 | 8.082 | 1 |
| 5614 MTERFD2 | ENST00000391980 | p.S129L  | c.386       | 0.003690418 | 0     | 1 |
| 5615 LRP6    | ENST00000261349 | p.R1093L | c.3279_3278 | 0.010322956 | 6.598 | 1 |
| 5615 LRP6    | ENST00000261349 | p.M1232V | c.3694      | 0.010322956 | 0     | 1 |
| 5616 CYP2C9  | ENST00000260682 | p.V38A   | c.113       | 0.017579039 | 5.83  | 1 |
| 5616 CYP2C9  | ENST00000260682 | p.F69V   | c.205       | 0.017579039 | 0     | 1 |
| 5617 EPHB4   | ENST00000358173 | p.A120V  | c.359       | 0.066384949 | 0     | 1 |
| 5617 EPHB4   | ENST00000358173 | p.Y175C  | c.524       | 0.066384949 | 3.913 | 1 |
| 5618 KCNU1   | ENST00000399881 | p.S393C  | c.1178      | 0.011581774 | 0     | 1 |
| 5618 KCNU1   | ENST00000399881 | p.S435F  | c.1304      | 0.011581774 | 6.432 | 1 |

|               |                 |         |           |             |       |   |
|---------------|-----------------|---------|-----------|-------------|-------|---|
| 5619 SYMPK    | ENST00000245934 | p.E60K  | c.178     | 0.007614685 | 7.037 | 1 |
| 5619 SYMPK    | ENST00000245934 | p.R102Q | c.305     | 0.007614685 | 0     | 1 |
| 5620 RGS16    | ENST00000367558 | p.A81T  | c.241     | 0.00572305  | 8.449 | 1 |
| 5620 RGS16    | ENST00000367558 | p.S174L | c.521     | 1.002861525 | 0     | 2 |
| 5621 NCKAP1   | ENST00000360982 | p.D622N | c.1864    | 0.012753173 | 0     | 1 |
| 5621 NCKAP1   | ENST00000360982 | p.R721C | c.2161    | 0.012753173 | 6.293 | 1 |
| 5622 PGD      | ENST00000270776 | p.P419L | c.1256    | 0.013048249 | 0     | 1 |
| 5622 PGD      | ENST00000270776 | p.L290V | c.868     | 0.013048249 | 6.26  | 1 |
| 5623 CUL3     | ENST00000264414 | p.K349N | c.1047    | 0.021717472 | 6.525 | 1 |
| 5623 CUL3     | ENST00000264414 | p.L321F | c.963     | 1.010858736 | 0     | 2 |
| 5624 ATG4A    | ENST00000372232 | p.P190L | c.569     | 1.009545259 | 0     | 2 |
| 5624 ATG4A    | ENST00000372232 | p.S214C | c.641     | 0.019090517 | 6.711 | 1 |
| 5625 SERPIND1 | ENST00000406799 | p.Y403C | c.1208    | 0.012788581 | 7.289 | 1 |
| 5625 SERPIND1 | ENST00000406799 | p.R492K | c.1475    | 1.00639429  | 0     | 1 |
| 5625 SERPIND1 | ENST00000406799 | p.R492T | c.1475    | 1.00639429  | 0     | 1 |
| 5626 PHGDH    | ENST00000369409 | p.F222C | c.665     | 0.007921558 | 6.98  | 1 |
| 5626 PHGDH    | ENST00000369409 | p.R247M | c.739_740 | 0.007921558 | 0     | 1 |
| 5627 RAB30    | ENST00000533486 | p.Y89C  | c.266     | 0.053215857 | 0     | 1 |
| 5627 RAB30    | ENST00000533486 | p.L119S | c.356     | 0.053215857 | 4.232 | 1 |
| 5628 CPB2     | ENST00000181383 | p.S334C | c.1001    | 0.028164077 | 0     | 1 |
| 5628 CPB2     | ENST00000181383 | p.G356D | c.1067    | 0.028164077 | 5.15  | 1 |
| 5629 PRKCI    | ENST00000295797 | p.P351S | c.1051    | 0.013801798 | 6.179 | 1 |
| 5629 PRKCI    | ENST00000295797 | p.N383I | c.1148    | 0.013801798 | 0     | 1 |
| 5630 HRSP12   | ENST00000520507 | p.R48M  | c.143     | 0.017493951 | 6.837 | 1 |
| 5632 ERBB4    | ENST00000342788 | p.T703K | c.2108    | 0.210224104 | 3.25  | 1 |
| 5632 ERBB4    | ENST00000342788 | p.D991N | c.2971    | 1.105112052 | 0     | 2 |
| 5633 STK4     | ENST00000372806 | p.D443N | c.1327    | 0.019012059 | 0     | 1 |
| 5633 STK4     | ENST00000372806 | p.I477K | c.1430    | 0.009420374 | 6.73  | 1 |
| 5633 STK4     | ENST00000372806 | p.K480M | c.1439    | 0.009591685 | 6.704 | 1 |
| 5634 CCBL1    | ENST00000436267 | p.G162S | c.484     | 0.012090352 | 0     | 1 |
| 5634 CCBL1    | ENST00000436267 | p.L185P | c.554     | 0.012090352 | 6.37  | 1 |
| 5635 PSPC1    | ENST00000338910 | p.G197E | c.590     | 0.013878544 | 0     | 1 |
| 5635 PSPC1    | ENST00000338910 | p.R228H | c.683     | 0.013878544 | 6.171 | 1 |
| 5636 NET1     | ENST00000355029 | p.R175W | c.523     | 0.078726874 | 3.667 | 1 |
| 5636 NET1     | ENST00000355029 | p.H328Y | c.982     | 0.078726874 | 0     | 1 |
| 5637 TNNC1    | ENST00000232975 | p.G110V | c.329     | 0.044470733 | 5.491 | 1 |
| 5637 TNNC1    | ENST00000232975 | p.R147C | c.439     | 1.022235367 | 0     | 1 |
| 5637 TNNC1    | ENST00000232975 | p.R147H | c.440     | 1.022235367 | 0     | 1 |
| 5638 CYP27A1  | ENST00000258415 | p.A437V | c.1310    | 0.065926395 | 3.923 | 1 |
| 5638 CYP27A1  | ENST00000258415 | p.P112Q | c.335     | 0.065926395 | 0     | 1 |
| 5639 HEXB     | ENST00000261416 | p.M65I  | c.195     | 0.092654188 | 3.432 | 1 |
| 5639 HEXB     | ENST00000261416 | p.N190D | c.568     | 0.092654188 | 0     | 1 |
| 5640 PC       | ENST00000393958 | p.Y503N | c.1507    | 0.005847355 | 7.418 | 1 |
| 5640 PC       | ENST00000393958 | p.R583H | c.1748    | 0.011985422 | 0     | 1 |
| 5640 PC       | ENST00000393958 | p.A615T | c.1843    | 0.006138067 | 7.348 | 1 |
| 5641 PRKG1    | ENST00000373980 | p.E254D | c.762     | 0.096388177 | 3.375 | 1 |
| 5641 PRKG1    | ENST00000373980 | p.T327N | c.980     | 0.096388177 | 0     | 1 |
| 5642 GSPT1    | ENST00000563468 | p.L304P | c.911     | 0.024147205 | 5.372 | 1 |
| 5642 GSPT1    | ENST00000563468 | p.L332F | c.994     | 0.024147205 | 0     | 1 |

|              |                 |          |        |             |       |   |
|--------------|-----------------|----------|--------|-------------|-------|---|
| 5643 FCN1    | ENST00000371806 | p.S202R  | c.606  | 0.121345429 | 0     | 1 |
| 5643 FCN1    | ENST00000371806 | p.P325H  | c.974  | 0.060306298 | 4.142 | 1 |
| 5643 FCN1    | ENST00000371806 | p.A326T  | c.976  | 0.068368984 | 3.95  | 1 |
| 5644 SHBG    | ENST00000380450 | p.E106Q  | c.316  | 0.068773663 | 3.862 | 1 |
| 5644 SHBG    | ENST00000380450 | p.D139V  | c.416  | 0.068773663 | 0     | 1 |
| 5645 USP11   | ENST00000218348 | p.A160T  | c.478  | 0.004521446 | 7.789 | 1 |
| 5645 USP11   | ENST00000218348 | p.R181C  | c.541  | 0.004521446 | 0     | 1 |
| 5646 HNRNPF  | ENST00000337970 | p.F130L  | c.390  | 0.230366047 | 2.118 | 1 |
| 5646 HNRNPF  | ENST00000337970 | p.I176M  | c.528  | 0.230366047 | 0     | 1 |
| 5647 CRAT    | ENST00000318080 | p.R443M  | c.1328 | 0.055475709 | 0     | 1 |
| 5647 CRAT    | ENST00000318080 | p.R82H   | c.245  | 0.055475709 | 4.172 | 1 |
| 5648 PTPN11  | ENST00000351677 | p.H114Y  | c.340  | 1.093934419 | 0     | 2 |
| 5648 PTPN11  | ENST00000351677 | p.L136H  | c.407  | 0.202004281 | 3.437 | 1 |
| 5648 PTPN11  | ENST00000351677 | p.Q214K  | c.640  | 0.020538603 | 9.287 | 1 |
| 5649 MIOX    | ENST00000216075 | p.E75K   | c.223  | 0.013611784 | 0     | 1 |
| 5649 MIOX    | ENST00000216075 | p.R268Q  | c.803  | 0.013611784 | 6.199 | 1 |
| 5650 CTTN    | ENST00000376561 | p.D450N  | c.1348 | 0.011525715 | 0     | 1 |
| 5650 CTTN    | ENST00000376561 | p.G491R  | c.1471 | 0.011525715 | 6.439 | 1 |
| 5651 OXSM    | ENST00000280701 | p.C402W  | c.1206 | 0.089188407 | 0     | 1 |
| 5651 OXSM    | ENST00000280701 | p.F438C  | c.1313 | 0.089188407 | 3.487 | 1 |
| 5652 CYP1A1  | ENST00000567032 | p.R134H  | c.401  | 1.00206592  | 0     | 2 |
| 5652 CYP1A1  | ENST00000567032 | p.I281N  | c.842  | 0.00413184  | 8.919 | 1 |
| 5653 MARK1   | ENST00000366917 | p.M339I  | c.1017 | 0.092141826 | 3.44  | 1 |
| 5653 MARK1   | ENST00000366917 | p.V361D  | c.1082 | 0.092141826 | 0     | 1 |
| 5654 HSD17B4 | ENST00000504811 | p.D119N  | c.355  | 0.077481731 | 0     | 1 |
| 5654 HSD17B4 | ENST00000504811 | p.M163T  | c.488  | 0.077481731 | 3.69  | 1 |
| 5655 GPT2    | ENST00000340124 | p.P391S  | c.1171 | 0.136313467 | 0     | 1 |
| 5655 GPT2    | ENST00000340124 | p.R134H  | c.401  | 0.136313467 | 2.875 | 1 |
| 5656 ROCK1   | ENST00000399799 | p.M128I  | c.384  | 0.092654188 | 3.432 | 1 |
| 5656 ROCK1   | ENST00000399799 | p.D216Y  | c.646  | 0.092654188 | 0     | 1 |
| 5657 ENPEP   | ENST00000265162 | p.N734K  | c.2202 | 0.030500993 | 0     | 1 |
| 5657 ENPEP   | ENST00000265162 | p.P779L  | c.2336 | 0.030500993 | 5.035 | 1 |
| 5658 OPRK1   | ENST00000265572 | p.P289L  | c.866  | 0.183010712 | 2.45  | 1 |
| 5658 OPRK1   | ENST00000265572 | p.S311N  | c.932  | 0.183010712 | 0     | 1 |
| 5659 HK1     | ENST00000448642 | p.V551I  | c.1651 | 0.079660039 | 0     | 1 |
| 5659 HK1     | ENST00000448642 | p.M698I  | c.2094 | 0.079660039 | 3.65  | 1 |
| 5660 AP1S1   | ENST00000337619 | p.R53M   | c.158  | 0.002171639 | 0     | 1 |
| 5660 AP1S1   | ENST00000337619 | p.S24L   | c.71   | 0.002171639 | 8.847 | 1 |
| 5661 LRBA    | ENST00000357115 | p.K2121N | c.6363 | 0.014874655 | 0     | 1 |
| 5661 LRBA    | ENST00000357115 | p.L2328M | c.6982 | 0.014874655 | 6.071 | 1 |
| 5662 FHIT    | ENST00000476844 | p.V38A   | c.113  | 0.156583055 | 2.675 | 1 |
| 5662 FHIT    | ENST00000476844 | p.V97I   | c.289  | 0.156583055 | 0     | 1 |
| 5663 NCK1    | ENST00000481752 | p.Y117C  | c.350  | 0.093298649 | 3.422 | 1 |
| 5663 NCK1    | ENST00000481752 | p.F155L  | c.465  | 0.093298649 | 0     | 1 |
| 5664 ACO1    | ENST00000379923 | p.S553F  | c.1658 | 0.00836163  | 6.902 | 1 |
| 5664 ACO1    | ENST00000379923 | p.L254V  | c.760  | 0.00836163  | 0     | 1 |
| 5665 PLXNC1  | ENST00000258526 | p.R1218Q | c.3653 | 0.00989558  | 6.659 | 1 |
| 5665 PLXNC1  | ENST00000258526 | p.K1244R | c.3731 | 0.00989558  | 0     | 1 |
| 5666 PARK2   | ENST00000366898 | p.A397V  | c.1190 | 0.070735431 | 0     | 1 |

|               |                 |          |         |             |       |   |
|---------------|-----------------|----------|---------|-------------|-------|---|
| 5666 PARK2    | ENST00000366898 | p.T237A  | c.709   | 0.046278501 | 4.47  | 1 |
| 5666 PARK2    | ENST00000366898 | p.T240M  | c.719   | 0.026768358 | 5.287 | 1 |
| 5667 USP2     | ENST00000260187 | p.R448Q  | c.1343  | 0.041636713 | 0     | 1 |
| 5667 USP2     | ENST00000260187 | p.P495S  | c.1483  | 0.041636713 | 4.586 | 1 |
| 5668 SMG7     | ENST00000507469 | p.K77E   | c.229   | 0.002573594 | 8.602 | 1 |
| 5668 SMG7     | ENST00000507469 | p.R163Q  | c.488   | 0.002573594 | 0     | 1 |
| 5669 IL6      | ENST00000420258 | p.G117S  | c.349   | 0.019818616 | 0     | 1 |
| 5669 IL6      | ENST00000420258 | p.A194G  | c.581   | 0.019818616 | 5.657 | 1 |
| 5670 ADAM8    | ENST00000445355 | p.E335K  | c.1003  | 0.004157696 | 0     | 1 |
| 5670 ADAM8    | ENST00000445355 | p.V288I  | c.862   | 0.004157696 | 7.91  | 1 |
| 5671 ERBB3    | ENST00000267101 | p.M91I   | c.273   | 1.009888723 | 0     | 2 |
| 5671 ERBB3    | ENST00000267101 | p.V119I  | c.355   | 0.019777447 | 6.66  | 1 |
| 5672 SUPT5H   | ENST00000432763 | p.R711H  | c.2132  | 1.224844578 | 0     | 2 |
| 5672 SUPT5H   | ENST00000432763 | p.V753A  | c.2258  | 0.449689156 | 2.153 | 1 |
| 5673 PNP      | ENST00000361505 | p.G140C  | c.418   | 0.008710674 | 6.843 | 1 |
| 5673 PNP      | ENST00000361505 | p.E201V  | c.602   | 0.008710674 | 0     | 1 |
| 5674 MARK1    | ENST00000366917 | p.D283N  | c.847   | 0.010731533 | 6.542 | 1 |
| 5674 MARK1    | ENST00000366917 | p.L288M  | c.862   | 0.002989252 | 8.386 | 1 |
| 5674 MARK1    | ENST00000366917 | p.M311L  | c.931   | 0.013720785 | 0     | 1 |
| 5675 CBLB     | ENST00000264122 | p.N69S   | c.206   | 0.016277241 | 5.941 | 1 |
| 5675 CBLB     | ENST00000264122 | p.D267N  | c.799   | 0.016277241 | 0     | 1 |
| 5676 NUP107   | ENST0000029179  | p.D825N  | c.2473  | 0.022860488 | 5.451 | 1 |
| 5676 NUP107   | ENST0000029179  | p.R885C  | c.2653  | 0.022860488 | 0     | 1 |
| 5677 NAT2     | ENST00000286479 | p.G90E   | c.269   | 0.138312169 | 3.854 | 1 |
| 5677 NAT2     | ENST00000286479 | p.T193M  | c.578   | 1.069156085 | 0     | 2 |
| 5678 ARID1B   | ENST00000367148 | p.K1099N | c.3297  | 0.051724801 | 0     | 1 |
| 5678 ARID1B   | ENST00000367148 | p.L1130V | c.3388  | 0.051724801 | 4.273 | 1 |
| 5679 DCUN1D3  | ENST00000563934 | p.R202L  | c.605   | 0.014308339 | 0     | 1 |
| 5679 DCUN1D3  | ENST00000563934 | p.F227V  | c.679   | 0.014308339 | 6.127 | 1 |
| 5680 CA6      | ENST00000377436 | p.Y71N   | c.211   | 0.091695834 | 3.447 | 1 |
| 5680 CA6      | ENST00000377436 | p.R96H   | c.287   | 0.091695834 | 0     | 1 |
| 5681 RRM1     | ENST00000300738 | p.L157F  | c.471   | 0.008801713 | 6.828 | 1 |
| 5681 RRM1     | ENST00000300738 | p.L205F  | c.613   | 0.008801713 | 0     | 1 |
| 5682 CUL3     | ENST00000264414 | p.L77P   | c.230   | 0.013792234 | 0     | 1 |
| 5682 CUL3     | ENST00000264414 | p.N138D  | c.412   | 0.013792234 | 6.18  | 1 |
| 5683 SERPINC1 | ENST00000367698 | p.G411V  | c.1232  | 0.026774436 | 5.223 | 1 |
| 5683 SERPINC1 | ENST00000367698 | p.S169Y  | c.506   | 0.026774436 | 0     | 1 |
| 5684 POLB     | ENST00000265421 | p.E71K   | c.211   | 0.121666172 | 3.039 | 1 |
| 5684 POLB     | ENST00000265421 | p.D17N   | c.49    | 0.121666172 | 0     | 1 |
| 5685 A2M      | ENST00000318602 | p.L965R  | c.2894  | 0.048160694 | 4.376 | 1 |
| 5685 A2M      | ENST00000318602 | p.F1248L | c.3744  | 0.048160694 | 0     | 1 |
| 5686 SUFU     | ENST00000369902 | p.T411M  | c.1232  | 0.030862527 | 5.018 | 1 |
| 5686 SUFU     | ENST00000369902 | p.E437K  | c.1309  | 0.030862527 | 0     | 1 |
| 5687 SYK      | ENST00000375754 | p.R42H   | c.125   | 0.066846693 | 3.903 | 1 |
| 5687 SYK      | ENST00000375754 | p.F17H   | c.49_50 | 0.066846693 | 0     | 1 |
| 5688 HUS1     | ENST00000436444 | p.H109N  | c.325   | 0.006258358 | 7.32  | 1 |
| 5688 HUS1     | ENST00000436444 | p.P134L  | c.401   | 0.006258358 | 0     | 1 |
| 5689 MTERF    | ENST00000351870 | p.F182L  | c.544   | 0.094469996 | 3.404 | 1 |
| 5689 MTERF    | ENST00000351870 | p.L208V  | c.622   | 0.094469996 | 0     | 1 |

|               |                 |          |        |             |       |   |
|---------------|-----------------|----------|--------|-------------|-------|---|
| 5690 RPGR     | ENST00000378505 | p.W194C  | c.582  | 0.013012121 | 6.264 | 1 |
| 5690 RPGR     | ENST00000378505 | p.S298R  | c.892  | 0.013012121 | 0     | 1 |
| 5691 DDX3X    | ENST00000399959 | p.D350N  | c.1048 | 0.014239083 | 0     | 1 |
| 5691 DDX3X    | ENST00000399959 | p.A383T  | c.1147 | 0.014239083 | 6.134 | 1 |
| 5692 DRD2     | ENST00000355319 | p.D178Y  | c.532  | 0.047366143 | 0     | 1 |
| 5692 DRD2     | ENST00000355319 | p.R219H  | c.656  | 0.047366143 | 4.4   | 1 |
| 5693 FAP      | ENST00000188790 | p.A128T  | c.382  | 0.065289735 | 3.937 | 1 |
| 5693 FAP      | ENST00000188790 | p.P149S  | c.445  | 0.065289735 | 0     | 1 |
| 5694 TTK      | ENST00000369798 | p.F540L  | c.1620 | 0.027110584 | 0     | 1 |
| 5694 TTK      | ENST00000369798 | p.C604F  | c.1811 | 0.027110584 | 5.205 | 1 |
| 5695 RYR2     | ENST00000360064 | p.L128M  | c.382  | 0.011265069 | 6.472 | 1 |
| 5695 RYR2     | ENST00000360064 | p.V201G  | c.602  | 0.011265069 | 0     | 1 |
| 5698 PUS10    | ENST00000316752 | p.H34D   | c.100  | 0.105330854 | 0     | 1 |
| 5698 PUS10    | ENST00000316752 | p.W188L  | c.563  | 0.105330854 | 3.247 | 1 |
| 5699 SIAH1    | ENST00000568007 | p.R215C  | c.643  | 0.016435965 | 5.927 | 1 |
| 5699 SIAH1    | ENST00000568007 | p.P240S  | c.718  | 0.016435965 | 0     | 1 |
| 5700 ADAT2    | ENST00000237283 | p.E38K   | c.112  | 0.00283979  | 8.46  | 1 |
| 5700 ADAT2    | ENST00000237283 | p.R59K   | c.176  | 0.00283979  | 0     | 1 |
| 5701 RYR2     | ENST00000360064 | p.H504Q  | c.1512 | 0.157562924 | 2.666 | 1 |
| 5701 RYR2     | ENST00000360064 | p.Y532H  | c.1594 | 0.157562924 | 0     | 1 |
| 5702 UBE2L6   | ENST00000287156 | p.P45A   | c.133  | 0.02373237  | 5.397 | 1 |
| 5702 UBE2L6   | ENST00000287156 | p.D124E  | c.372  | 0.02373237  | 0     | 1 |
| 5703 SNUPN    | ENST00000371091 | p.V165M  | c.493  | 0.010591128 | 0     | 1 |
| 5703 SNUPN    | ENST00000371091 | p.W318S  | c.953  | 0.010591128 | 6.561 | 1 |
| 5704 ITGA2B   | ENST00000262407 | p.R480I  | c.1439 | 0.018504244 | 5.756 | 1 |
| 5704 ITGA2B   | ENST00000262407 | p.E92K   | c.274  | 0.018504244 | 0     | 1 |
| 5705 PNLIPRP1 | ENST00000358834 | p.L45I   | c.133  | 0.022097087 | 0     | 1 |
| 5705 PNLIPRP1 | ENST00000358834 | p.R141P  | c.422  | 0.022097087 | 5.5   | 1 |
| 5706 ARHGEF11 | ENST00000368194 | p.I826M  | c.2478 | 0.005551141 | 0     | 1 |
| 5706 ARHGEF11 | ENST00000368194 | p.F872L  | c.2616 | 0.005551141 | 7.493 | 1 |
| 5707 GSTZ1    | ENST00000553586 | p.T34M   | c.101  | 0.027431931 | 0     | 1 |
| 5707 GSTZ1    | ENST00000553586 | p.I8N    | c.23   | 0.027431931 | 5.188 | 1 |
| 5708 ANKRD27  | ENST00000306065 | p.L569P  | c.1706 | 0.046941248 | 0     | 1 |
| 5708 ANKRD27  | ENST00000306065 | p.T591I  | c.1772 | 0.046941248 | 4.413 | 1 |
| 5709 CPN1     | ENST00000370418 | p.S360Y  | c.1079 | 0.031995216 | 4.966 | 1 |
| 5709 CPN1     | ENST00000370418 | p.A389S  | c.1165 | 0.031995216 | 0     | 1 |
| 5710 PRKCQ    | ENST00000263125 | p.E571K  | c.1711 | 0.012023494 | 6.378 | 1 |
| 5710 PRKCQ    | ENST00000263125 | p.L610P  | c.1829 | 0.012023494 | 0     | 1 |
| 5711 TALDO1   | ENST00000319006 | p.P46T   | c.136  | 0.090055768 | 5.058 | 1 |
| 5711 TALDO1   | ENST00000319006 | p.A109T  | c.325  | 2.030018589 | 0     | 3 |
| 5712 TCEB1    | ENST00000522337 | p.P49Q   | c.146  | 0.014598865 | 6.098 | 1 |
| 5712 TCEB1    | ENST00000522337 | p.S86G   | c.256  | 0.014598865 | 0     | 1 |
| 5713 KLC2     | ENST00000417856 | p.R348W  | c.1042 | 0.004534    | 8.785 | 1 |
| 5713 KLC2     | ENST00000417856 | p.A385V  | c.1154 | 1.002267    | 0     | 2 |
| 5714 ADORA2A  | ENST00000337539 | p.L95F   | c.283  | 0.056445407 | 0     | 1 |
| 5714 ADORA2A  | ENST00000337539 | p.P285L  | c.854  | 0.056445407 | 4.147 | 1 |
| 5715 HMGCS2   | ENST00000369406 | p.L394V  | c.1180 | 0.006693609 | 7.223 | 1 |
| 5715 HMGCS2   | ENST00000369406 | p.A58V   | c.173  | 0.006693609 | 0     | 1 |
| 5716 NSD1     | ENST00000439151 | p.I1907V | c.5719 | 0.028203148 | 5.148 | 1 |

|             |                 |          |           |             |       |   |
|-------------|-----------------|----------|-----------|-------------|-------|---|
| 5716 NSD1   | ENST00000439151 | p.F1967C | c.5900    | 0.028203148 | 0     | 1 |
| 5717 ELAVL1 | ENST00000351593 | p.R46K   | c.137     | 0.025952188 | 0     | 1 |
| 5717 ELAVL1 | ENST00000351593 | p.E102D  | c.306     | 0.025952188 | 5.268 | 1 |
| 5718 HBE1   | ENST00000380237 | p.T39P   | c.115     | 0.002499751 | 8.644 | 1 |
| 5718 HBE1   | ENST00000380237 | p.K60E   | c.178     | 0.002499751 | 0     | 1 |
| 5719 CBS    | ENST00000352178 | p.T428I  | c.1283    | 0.026793001 | 0     | 1 |
| 5719 CBS    | ENST00000352178 | p.E292K  | c.874     | 0.026793001 | 5.222 | 1 |
| 5720 EZR    | ENST00000337147 | p.R81W   | c.241     | 0.170400326 | 2.553 | 1 |
| 5720 EZR    | ENST00000337147 | p.L104F  | c.310     | 0.170400326 | 0     | 1 |
| 5721 HARS   | ENST00000504156 | p.R405Q  | c.1214    | 1.013527134 | 0     | 2 |
| 5721 HARS   | ENST00000504156 | p.V72L   | c.214     | 0.027054268 | 6.208 | 1 |
| 5722 TLR3   | ENST00000296795 | p.K418Q  | c.1252    | 0.119244944 | 0     | 1 |
| 5722 TLR3   | ENST00000296795 | p.N441T  | c.1322    | 0.119244944 | 3.068 | 1 |
| 5723 SENP7  | ENST00000394095 | p.S704L  | c.2111    | 0.094208432 | 0     | 1 |
| 5723 SENP7  | ENST00000394095 | p.K964E  | c.2890    | 0.094208432 | 3.408 | 1 |
| 5724 HAAO   | ENST00000294973 | p.H47Y   | c.139     | 0.044316876 | 0     | 1 |
| 5724 HAAO   | ENST00000294973 | p.E105K  | c.313     | 0.044316876 | 4.496 | 1 |
| 5725 WRN    | ENST00000298139 | p.E975K  | c.2923    | 0.160428237 | 2.64  | 1 |
| 5725 WRN    | ENST00000298139 | p.A1042P | c.3124    | 0.160428237 | 0     | 1 |
| 5726 MMP1   | ENST00000315274 | p.E402K  | c.1204    | 0.0217476   | 5.523 | 1 |
| 5726 MMP1   | ENST00000315274 | p.E333K  | c.997     | 0.0217476   | 0     | 1 |
| 5727 MCEE   | ENST00000244217 | p.L69P   | c.207_206 | 0.006142323 | 0     | 1 |
| 5727 MCEE   | ENST00000244217 | p.E126K  | c.376     | 0.006142323 | 7.347 | 1 |
| 5728 ACVR2A | ENST00000241416 | p.A381V  | c.1142    | 0.018376426 | 0     | 1 |
| 5728 ACVR2A | ENST00000241416 | p.A466T  | c.1396    | 0.018376426 | 5.766 | 1 |
| 5729 CXCL10 | ENST00000306602 | p.N37H   | c.109     | 0.200128703 | 0     | 1 |
| 5729 CXCL10 | ENST00000306602 | p.S79L   | c.236     | 0.200128703 | 2.321 | 1 |
| 5730 TAB1   | ENST00000216160 | p.Y367C  | c.1100    | 0.083042863 | 3.59  | 1 |
| 5730 TAB1   | ENST00000216160 | p.S193L  | c.578     | 0.083042863 | 0     | 1 |
| 5731 GM2A   | ENST00000357164 | p.C106R  | c.316     | 0.116790918 | 4.098 | 1 |
| 5731 GM2A   | ENST00000357164 | p.R130C  | c.388     | 1.058395459 | 0     | 1 |
| 5731 GM2A   | ENST00000357164 | p.R130H  | c.389     | 1.058395459 | 0     | 1 |
| 5732 HAAO   | ENST00000294973 | p.V226E  | c.677     | 0.030798417 | 5.021 | 1 |
| 5732 HAAO   | ENST00000294973 | p.G259W  | c.775     | 0.030798417 | 0     | 1 |
| 5733 CASC5  | ENST00000346991 | p.P2192S | c.6574    | 0.007604136 | 0     | 1 |
| 5733 CASC5  | ENST00000346991 | p.A2273T | c.6817    | 0.007604136 | 7.039 | 1 |
| 5734 MET    | ENST00000318493 | p.S525Y  | c.1574    | 0.106137031 | 3.236 | 1 |
| 5734 MET    | ENST00000318493 | p.T618M  | c.1853    | 0.106137031 | 0     | 1 |
| 5735 EPHA2  | ENST00000358432 | p.A146V  | c.437     | 0.042159454 | 4.568 | 1 |
| 5735 EPHA2  | ENST00000358432 | p.R168H  | c.503     | 0.042159454 | 0     | 1 |
| 5736 IDUA   | ENST00000453894 | p.T180S  | c.539     | 0.009671799 | 6.692 | 1 |
| 5737 INHBA  | ENST00000442711 | p.W338R  | c.1012    | 0.049617746 | 4.333 | 1 |
| 5737 INHBA  | ENST00000442711 | p.D405N  | c.1213    | 0.049617746 | 0     | 1 |
| 5739 ELMO1  | ENST00000442504 | p.R569W  | c.1705    | 0.019397305 | 5.688 | 1 |
| 5739 ELMO1  | ENST00000442504 | p.E592K  | c.1774    | 0.019397305 | 0     | 1 |
| 5740 SSRP1  | ENST00000278412 | p.T209I  | c.626     | 0.132861959 | 2.912 | 1 |
| 5740 SSRP1  | ENST00000278412 | p.I274L  | c.820     | 0.132861959 | 0     | 1 |
| 5741 CAPN9  | ENST00000271971 | p.E284Q  | c.850     | 0.084143754 | 3.571 | 1 |
| 5741 CAPN9  | ENST00000271971 | p.F317L  | c.951     | 0.084143754 | 0     | 1 |

|               |                 |          |        |             |       |   |
|---------------|-----------------|----------|--------|-------------|-------|---|
| 5742 JAK2     | ENST00000539801 | p.W737L  | c.2210 | 0.026941986 | 5.214 | 1 |
| 5742 JAK2     | ENST00000539801 | p.H770L  | c.2309 | 0.026941986 | 0     | 1 |
| 5743 NUP214   | ENST00000451030 | p.S308G  | c.922  | 0.008961774 | 6.802 | 1 |
| 5743 NUP214   | ENST00000451030 | p.L329F  | c.985  | 0.008961774 | 0     | 1 |
| 5745 PARP1    | ENST00000366794 | p.A811T  | c.2431 | 0.019873641 | 5.653 | 1 |
| 5745 PARP1    | ENST00000366794 | p.D835N  | c.2503 | 0.019873641 | 0     | 1 |
| 5746 MEP1B    | ENST00000269202 | p.D47A   | c.140  | 0.013907433 | 0     | 1 |
| 5746 MEP1B    | ENST00000269202 | p.N187T  | c.560  | 0.013907433 | 6.168 | 1 |
| 5747 TYW5     | ENST00000354611 | p.R183G  | c.547  | 0.004434539 | 0     | 1 |
| 5747 TYW5     | ENST00000354611 | p.R300Q  | c.899  | 0.004434539 | 7.817 | 1 |
| 5748 SARS     | ENST00000369923 | p.A348T  | c.1042 | 0.003513197 | 8.153 | 1 |
| 5748 SARS     | ENST00000369923 | p.D378Y  | c.1132 | 0.003513197 | 0     | 1 |
| 5749 PHYH     | ENST00000263038 | p.A192T  | c.574  | 0.230366047 | 3.118 | 1 |
| 5749 PHYH     | ENST00000263038 | p.S279F  | c.836  | 1.115183023 | 0     | 2 |
| 5750 MYH7     | ENST00000355349 | p.P687H  | c.2060 | 0.009651708 | 0     | 1 |
| 5750 MYH7     | ENST00000355349 | p.R108C  | c.322  | 0.009651708 | 6.695 | 1 |
| 5751 APP      | ENST00000346798 | p.A154T  | c.460  | 0.022066475 | 0     | 1 |
| 5751 APP      | ENST00000346798 | p.E183Q  | c.547  | 0.022066475 | 5.502 | 1 |
| 5752 ATG4A    | ENST00000372232 | p.G135C  | c.403  | 0.019505165 | 6.68  | 1 |
| 5752 ATG4A    | ENST00000372232 | p.M185I  | c.555  | 1.009752582 | 0     | 2 |
| 5753 PTPRO    | ENST00000281171 | p.N1002S | c.3005 | 0.088327103 | 3.501 | 1 |
| 5753 PTPRO    | ENST00000281171 | p.R1122Q | c.3365 | 0.088327103 | 0     | 1 |
| 5754 RYR3     | ENST00000389232 | p.I2617M | c.7851 | 0.07982586  | 0     | 1 |
| 5754 RYR3     | ENST00000389232 | p.L2791I | c.8371 | 0.07982586  | 3.647 | 1 |
| 5755 SCARB2   | ENST00000264896 | p.S52F   | c.155  | 0.014397878 | 6.118 | 1 |
| 5755 SCARB2   | ENST00000264896 | p.R95I   | c.284  | 0.014397878 | 0     | 1 |
| 5756 LSS      | ENST00000397728 | p.S149Y  | c.446  | 0.201102093 | 3.314 | 1 |
| 5756 LSS      | ENST00000397728 | p.I179L  | c.535  | 1.100551046 | 0     | 2 |
| 5757 TRAF6    | ENST00000348124 | p.E369K  | c.1105 | 0.021123607 | 5.565 | 1 |
| 5757 TRAF6    | ENST00000348124 | p.P398L  | c.1193 | 0.021123607 | 0     | 1 |
| 5758 RAB6B    | ENST00000285208 | p.V90M   | c.268  | 0.027431931 | 0     | 1 |
| 5758 RAB6B    | ENST00000285208 | p.G20R   | c.58   | 0.027431931 | 5.188 | 1 |
| 5759 NCAM1    | ENST00000524665 | p.R499W  | c.1495 | 1.02664484  | 0     | 2 |
| 5759 NCAM1    | ENST00000524665 | p.N537S  | c.1610 | 0.053289681 | 5.23  | 1 |
| 5760 PRKCA    | ENST00000413366 | p.L425F  | c.1273 | 0.007839623 | 6.995 | 1 |
| 5760 PRKCA    | ENST00000413366 | p.N468K  | c.1404 | 0.007839623 | 0     | 1 |
| 5761 RGS8     | ENST00000258302 | p.S74F   | c.221  | 0.024929539 | 5.326 | 1 |
| 5761 RGS8     | ENST00000258302 | p.E173V  | c.518  | 0.024929539 | 0     | 1 |
| 5762 PAPSS1   | ENST00000265174 | p.V387F  | c.1159 | 0.008943158 | 0     | 1 |
| 5762 PAPSS1   | ENST00000265174 | p.V269I  | c.805  | 0.008943158 | 6.805 | 1 |
| 5763 CSNK1G3  | ENST00000395412 | p.H154N  | c.460  | 0.098892163 | 3.338 | 1 |
| 5763 CSNK1G3  | ENST00000395412 | p.R228T  | c.683  | 0.098892163 | 0     | 1 |
| 5764 NUP98    | ENST00000324932 | p.C743R  | c.2227 | 0.008384846 | 6.898 | 1 |
| 5764 NUP98    | ENST00000324932 | p.R779M  | c.2336 | 0.008384846 | 0     | 1 |
| 5765 LIG3     | ENST00000378526 | p.G706S  | c.2116 | 0.03724008  | 0     | 1 |
| 5765 LIG3     | ENST00000378526 | p.Q742R  | c.2225 | 0.03724008  | 4.747 | 1 |
| 5766 CSF3R    | ENST00000440588 | p.I48N   | c.143  | 0.015799251 | 0     | 1 |
| 5766 CSF3R    | ENST00000440588 | p.G81R   | c.241  | 0.015799251 | 5.984 | 1 |
| 5767 CDC42BPB | ENST00000361246 | p.R351Q  | c.1052 | 0.091378591 | 0     | 1 |



|               |                 |                        |             |             |       |   |
|---------------|-----------------|------------------------|-------------|-------------|-------|---|
| 5767 CDC42BPB | ENST00000361246 | p.IRLA213in_frame_ins* | c.640_639   | 0.091378591 | 3.452 | 1 |
| 5768 GRM5     | ENST00000305447 | p.A423T                | c.1267      | 0.081277509 | 3.621 | 1 |
| 5768 GRM5     | ENST00000305447 | p.N88S                 | c.263       | 0.081277509 | 0     | 1 |
| 5769 ACE      | ENST00000290866 | p.R858W                | c.2572      | 0.0129312   | 6.273 | 1 |
| 5769 ACE      | ENST00000290866 | p.E1211in_frame_del    | c.3630_3632 | 0.0129312   | 0     | 1 |
| 5770 KSR2     | ENST00000339824 | p.F677S                | c.2030      | 0.013888167 | 0     | 1 |
| 5770 KSR2     | ENST00000339824 | p.D786N                | c.2356      | 0.013888167 | 6.17  | 1 |
| 5771 BPIFA1   | ENST00000375413 | p.A148T                | c.442       | 0.004428396 | 0     | 1 |
| 5771 BPIFA1   | ENST00000375413 | p.G196D                | c.587       | 0.004428396 | 7.819 | 1 |
| 5772 PEX3     | ENST00000367591 | p.F344S                | c.1031      | 0.132310549 | 3.918 | 1 |
| 5772 PEX3     | ENST00000367591 | p.R286Q                | c.857       | 1.066155275 | 0     | 2 |
| 5773 APPL2    | ENST00000551662 | p.I376M                | c.1128      | 0.007457977 | 0     | 1 |
| 5773 APPL2    | ENST00000551662 | p.D332N                | c.994       | 0.007457977 | 7.067 | 1 |
| 5774 VWF      | ENST00000261405 | p.A1812T               | c.5434      | 0.010180837 | 6.618 | 1 |
| 5774 VWF      | ENST00000261405 | p.R1837Q               | c.5510      | 0.010180837 | 0     | 1 |
| 5775 DNMBP    | ENST00000342239 | p.T1036A               | c.3106      | 0.006939272 | 7.171 | 1 |
| 5775 DNMBP    | ENST00000342239 | p.F1116L               | c.3346      | 0.006939272 | 0     | 1 |
| 5776 IL21     | ENST00000264497 | p.R139K                | c.416       | 0.014864348 | 6.072 | 1 |
| 5776 IL21     | ENST00000264497 | p.S162F                | c.485       | 0.014864348 | 0     | 1 |
| 5777 GALT     | ENST00000378842 | p.E237Q                | c.709       | 0.006633564 | 7.236 | 1 |
| 5777 GALT     | ENST00000378842 | p.E271D                | c.813       | 0.006633564 | 0     | 1 |
| 5778 NCF4     | ENST00000397147 | p.R241H                | c.722       | 0.010517969 | 6.571 | 1 |
| 5779 PABPN1   | ENST00000216727 | p.A171V                | c.512       | 0.074998211 | 3.737 | 1 |
| 5779 PABPN1   | ENST00000216727 | p.V226K                | c.676_677   | 0.074998211 | 0     | 1 |
| 5780 ATG5     | ENST00000343245 | p.P186S                | c.556       | 0.243501067 | 2.038 | 1 |
| 5780 ATG5     | ENST00000343245 | p.L265I                | c.793       | 0.243501067 | 0     | 1 |
| 5781 STRADA   | ENST00000336174 | p.R362C                | c.1084      | 0.006891339 | 7.181 | 1 |
| 5781 STRADA   | ENST00000336174 | p.T295S                | c.883       | 0.006891339 | 0     | 1 |
| 5782 PDZRN3   | ENST00000263666 | p.A369T                | c.1105      | 0.242658617 | 2.043 | 1 |
| 5782 PDZRN3   | ENST00000263666 | p.S278N                | c.833       | 0.242658617 | 0     | 1 |
| 5783 IFIT2    | ENST00000371826 | p.R132G                | c.394       | 0.114704985 | 0     | 1 |
| 5783 IFIT2    | ENST00000371826 | p.Q15P                 | c.44        | 0.114704985 | 3.124 | 1 |
| 5784 CNOT1    | ENST00000317147 | p.R1248C               | c.3742      | 0.011557715 | 0     | 1 |
| 5784 CNOT1    | ENST00000317147 | p.N1289S               | c.3866      | 0.011557715 | 6.435 | 1 |
| 5785 IPO13    | ENST00000372343 | p.S253L                | c.758       | 0.007104752 | 7.137 | 1 |
| 5785 IPO13    | ENST00000372343 | p.T304I                | c.911       | 0.007104752 | 0     | 1 |
| 5786 AOC1     | ENST00000416793 | p.L36I                 | c.106       | 0.075834598 | 3.721 | 1 |
| 5786 AOC1     | ENST00000416793 | p.IEML72in_frame_del   | c.211_222   | 0.075834598 | 0     | 1 |
| 5787 MYOM1    | ENST00000356443 | p.N1147H               | c.3439      | 0.005843304 | 0     | 1 |
| 5787 MYOM1    | ENST00000356443 | p.R1231C               | c.3691      | 0.005843304 | 7.419 | 1 |
| 5788 CHRNB2   | ENST00000368476 | p.R106W                | c.316       | 0.030018589 | 0     | 1 |
| 5788 CHRNB2   | ENST00000368476 | p.S175L                | c.524       | 0.030018589 | 5.058 | 1 |
| 5789 TACR1    | ENST00000305249 | p.T339A                | c.1015      | 0.028975955 | 5.109 | 1 |
| 5789 TACR1    | ENST00000305249 | p.R62I                 | c.185       | 0.028975955 | 0     | 1 |
| 5790 IL6R     | ENST00000368485 | p.V58A                 | c.173       | 0.030522142 | 5.034 | 1 |
| 5790 IL6R     | ENST00000368485 | p.R80G                 | c.238       | 0.030522142 | 0     | 1 |
| 5791 FTH1     | ENST00000273550 | p.E62Q                 | c.184       | 0.013527134 | 6.208 | 1 |
| 5791 FTH1     | ENST00000273550 | p.K144E                | c.430       | 0.013527134 | 0     | 1 |
| 5792 AQP5     | ENST00000293599 | p.A98T                 | c.292       | 0.005384395 | 0     | 1 |

|               |                 |         |        |             |       |   |
|---------------|-----------------|---------|--------|-------------|-------|---|
| 5792 AQP5     | ENST00000293599 | p.A193V | c.578  | 0.005384395 | 7.537 | 1 |
| 5793 CRYAB    | ENST00000227251 | p.S138L | c.413  | 0.052446852 | 0     | 1 |
| 5793 CRYAB    | ENST00000227251 | p.R163H | c.488  | 0.052446852 | 4.253 | 1 |
| 5794 FOLR1    | ENST00000393679 | p.D77N  | c.229  | 0.012081974 | 7.371 | 1 |
| 5794 FOLR1    | ENST00000393679 | p.R125C | c.373  | 1.006040987 | 0     | 1 |
| 5794 FOLR1    | ENST00000393679 | p.R125H | c.374  | 1.006040987 | 0     | 1 |
| 5795 KIF9     | ENST00000265529 | p.D83N  | c.247  | 0.120825762 | 0     | 1 |
| 5795 KIF9     | ENST00000265529 | p.R130H | c.389  | 0.120825762 | 3.049 | 1 |
| 5796 RNF31    | ENST00000324103 | p.T74R  | c.221  | 0.022328033 | 0     | 1 |
| 5796 RNF31    | ENST00000324103 | p.V109A | c.326  | 0.022328033 | 5.485 | 1 |
| 5797 CES1     | ENST00000360526 | p.P71L  | c.212  | 0.012976094 | 6.268 | 1 |
| 5797 CES1     | ENST00000360526 | p.R200C | c.598  | 0.012976094 | 0     | 1 |
| 5798 MAPK13   | ENST00000211287 | p.V146I | c.436  | 0.082812939 | 3.594 | 1 |
| 5798 MAPK13   | ENST00000211287 | p.F324S | c.971  | 0.082812939 | 0     | 1 |
| 5799 KDM4C    | ENST00000381309 | p.G106S | c.316  | 0.006407601 | 0     | 1 |
| 5799 KDM4C    | ENST00000381309 | p.V130A | c.389  | 0.006407601 | 7.286 | 1 |
| 5800 CNTN2    | ENST00000331830 | p.R362W | c.1084 | 0.041377778 | 4.595 | 1 |
| 5800 CNTN2    | ENST00000331830 | p.G391S | c.1171 | 0.041377778 | 0     | 1 |
| 5801 KIR3DL1  | ENST00000541392 | p.V168I | c.502  | 0.009303569 | 0     | 1 |
| 5801 KIR3DL1  | ENST00000541392 | p.S239N | c.716  | 0.009303569 | 6.748 | 1 |
| 5802 DHFR     | ENST00000439211 | p.R78K  | c.233  | 0.029217975 | 5.097 | 1 |
| 5802 DHFR     | ENST00000439211 | p.S120Y | c.359  | 0.029217975 | 0     | 1 |
| 5803 CSF2RB   | ENST00000406230 | p.A387T | c.1159 | 0.20661258  | 2.275 | 1 |
| 5803 CSF2RB   | ENST00000406230 | p.R413M | c.1238 | 0.20661258  | 0     | 1 |
| 5804 PTPRR    | ENST00000283228 | p.N419T | c.1256 | 0.020249078 | 5.626 | 1 |
| 5804 PTPRR    | ENST00000283228 | p.I447V | c.1339 | 0.020249078 | 0     | 1 |
| 5805 KLK5     | ENST00000391809 | p.N173K | c.519  | 0.143289023 | 0     | 1 |
| 5805 KLK5     | ENST00000391809 | p.S260F | c.779  | 0.143289023 | 2.803 | 1 |
| 5806 PF4V1    | ENST00000226524 | p.T49I  | c.146  | 0.010866265 | 6.524 | 1 |
| 5806 PF4V1    | ENST00000226524 | p.I85F  | c.253  | 0.010866265 | 0     | 1 |
| 5807 TUBGCP4  | ENST00000260383 | p.P134S | c.400  | 0.006712193 | 0     | 1 |
| 5807 TUBGCP4  | ENST00000260383 | p.V168I | c.502  | 0.006712193 | 7.219 | 1 |
| 5808 CYP2E1   | ENST00000252945 | p.D124N | c.370  | 0.171942727 | 3.54  | 1 |
| 5808 CYP2E1   | ENST00000252945 | p.R282C | c.844  | 1.085971364 | 0     | 1 |
| 5808 CYP2E1   | ENST00000252945 | p.R282H | c.845  | 1.085971364 | 0     | 1 |
| 5809 PRDM11   | ENST00000530656 | p.V163M | c.487  | 0.033100573 | 0     | 1 |
| 5809 PRDM11   | ENST00000530656 | p.R256Q | c.767  | 0.033100573 | 4.917 | 1 |
| 5810 SERPINB5 | ENST00000382771 | p.A339T | c.1015 | 0.087777805 | 3.51  | 1 |
| 5810 SERPINB5 | ENST00000382771 | p.K268N | c.804  | 0.087777805 | 0     | 1 |
| 5811 GRM3     | ENST00000361669 | p.K254N | c.762  | 0.163912752 | 0     | 1 |
| 5811 GRM3     | ENST00000361669 | p.A288T | c.862  | 0.163912752 | 2.609 | 1 |
| 5812 MTMR6    | ENST00000381801 | p.P485S | c.1453 | 0.008132981 | 0     | 1 |
| 5812 MTMR6    | ENST00000381801 | p.A318V | c.953  | 0.008132981 | 6.942 | 1 |
| 5813 STS      | ENST00000217961 | p.K353R | c.1058 | 0.015997608 | 5.966 | 1 |
| 5813 STS      | ENST00000217961 | p.G173R | c.517  | 0.015997608 | 0     | 1 |
| 5814 PKM      | ENST00000319622 | p.T60M  | c.179  | 0.009800017 | 6.673 | 1 |
| 5814 PKM      | ENST00000319622 | p.R92H  | c.275  | 0.009800017 | 0     | 1 |
| 5815 AKR1B10  | ENST00000359579 | p.G115E | c.344  | 0.06515411  | 3.94  | 1 |
| 5815 AKR1B10  | ENST00000359579 | p.A136V | c.407  | 0.06515411  | 0     | 1 |

|               |                 |          |             |             |       |   |
|---------------|-----------------|----------|-------------|-------------|-------|---|
| 5816 ARHGEF12 | ENST00000397843 | p.F1076L | c.3226      | 0.01678132  | 5.897 | 1 |
| 5816 ARHGEF12 | ENST00000397843 | p.A1107T | c.3319      | 0.01678132  | 0     | 1 |
| 5817 DIRAS2   | ENST00000375765 | p.P115L  | c.344       | 0.008076803 | 0     | 1 |
| 5817 DIRAS2   | ENST00000375765 | p.A146S  | c.436       | 0.008076803 | 6.952 | 1 |
| 5818 L3MBTL1  | ENST00000427442 | p.L429F  | c.1285      | 0.020905118 | 5.58  | 1 |
| 5818 L3MBTL1  | ENST00000427442 | p.P477H  | c.1430      | 0.020905118 | 0     | 1 |
| 5819 RAPH1    | ENST00000374493 | p.K423R  | c.1268      | 1.00677295  | 0     | 2 |
| 5819 RAPH1    | ENST00000374493 | p.E452K  | c.1354      | 0.013545899 | 7.206 | 1 |
| 5820 PARP1    | ENST00000366794 | p.S568F  | c.1703      | 0.547512004 | 2.454 | 1 |
| 5820 PARP1    | ENST00000366794 | p.R591C  | c.1771      | 2.182504001 | 0     | 1 |
| 5820 PARP1    | ENST00000366794 | p.R591S  | c.1771      | 2.182504001 | 0     | 1 |
| 5820 PARP1    | ENST00000366794 | p.R591H  | c.1772      | 2.182504001 | 0     | 1 |
| 5821 SAA1     | ENST00000356524 | p.F86L   | c.258       | 0.011351289 | 0     | 1 |
| 5821 SAA1     | ENST00000356524 | p.E27K   | c.79        | 0.011351289 | 6.461 | 1 |
| 5822 PGD      | ENST00000270776 | p.E191Q  | c.571       | 0.059954007 | 5.06  | 1 |
| 5822 PGD      | ENST00000270776 | p.R288W  | c.862       | 1.029977004 | 0     | 1 |
| 5822 PGD      | ENST00000270776 | p.R288Q  | c.863       | 1.029977004 | 0     | 1 |
| 5823 SPRED2   | ENST00000452315 | p.V34E   | c.101       | 0.200128703 | 2.321 | 1 |
| 5823 SPRED2   | ENST00000452315 | p.L115F  | c.343       | 0.200128703 | 0     | 1 |
| 5824 PRDX2    | ENST00000301522 | p.R110C  | c.328       | 0.007416735 | 7.075 | 1 |
| 5824 PRDX2    | ENST00000301522 | p.P13L   | c.38        | 0.007416735 | 0     | 1 |
| 5825 CD180    | ENST00000256447 | p.S539Y  | c.1616      | 0.006236706 | 7.325 | 1 |
| 5825 CD180    | ENST00000256447 | p.R561C  | c.1681      | 0.006236706 | 0     | 1 |
| 5826 IRAK4    | ENST00000448290 | p.A335P  | c.1003      | 0.010103507 | 6.629 | 1 |
| 5826 IRAK4    | ENST00000448290 | p.P366T  | c.1096      | 0.010103507 | 0     | 1 |
| 5827 NR2F2    | ENST00000394166 | p.R371H  | c.1112      | 0.03836674  | 4.704 | 1 |
| 5827 NR2F2    | ENST00000394166 | p.R293W  | c.877       | 0.03836674  | 0     | 1 |
| 5828 CFB      | ENST00000556679 | p.L775M  | c.2323      | 0.007598867 | 7.04  | 1 |
| 5828 CFB      | ENST00000556679 | p.W823F  | c.2468_2469 | 0.007598867 | 0     | 1 |
| 5829 IMPA2    | ENST00000269159 | p.T97M   | c.290       | 0.097328086 | 0     | 1 |
| 5829 IMPA2    | ENST00000269159 | p.F122S  | c.365       | 0.097328086 | 3.361 | 1 |
| 5830 IL1R1    | ENST00000410023 | p.E38K   | c.112       | 0.122257934 | 0     | 1 |
| 5830 IL1R1    | ENST00000410023 | p.P85S   | c.253       | 0.122257934 | 3.032 | 1 |
| 5831 CD46     | ENST00000322875 | p.A93T   | c.277       | 0.004431467 | 0     | 1 |
| 5831 CD46     | ENST00000322875 | p.I126V  | c.376       | 0.004431467 | 7.818 | 1 |
| 5832 ARG2     | ENST00000261783 | p.D221Y  | c.661       | 0.008531411 | 6.873 | 1 |
| 5832 ARG2     | ENST00000261783 | p.R274Q  | c.821       | 0.008531411 | 0     | 1 |
| 5833 CIAPIN1  | ENST00000394391 | p.P69S   | c.205       | 0.027641889 | 0     | 1 |
| 5833 CIAPIN1  | ENST00000394391 | p.E138K  | c.412       | 0.027641889 | 5.177 | 1 |
| 5834 ESYT2    | ENST00000251527 | p.V339I  | c.1015      | 1.109499789 | 0     | 2 |
| 5834 ESYT2    | ENST00000251527 | p.A288D  | c.863       | 0.218999579 | 3.191 | 1 |
| 5835 FLT3     | ENST00000380982 | p.R387Q  | c.1160      | 0.00841979  | 0     | 1 |
| 5835 FLT3     | ENST00000380982 | p.E415K  | c.1243      | 0.00841979  | 6.892 | 1 |
| 5836 FAP      | ENST00000188790 | p.R590Q  | c.1769      | 0.067171823 | 0     | 1 |
| 5836 FAP      | ENST00000188790 | p.G666C  | c.1996      | 0.067171823 | 3.896 | 1 |
| 5837 CHKB     | ENST00000406938 | p.P133H  | c.398       | 0.041752315 | 0     | 1 |
| 5837 CHKB     | ENST00000406938 | p.E178G  | c.533       | 0.041752315 | 4.582 | 1 |
| 5838 PDZK1    | ENST00000417171 | p.F147L  | c.441       | 0.023699493 | 0     | 1 |
| 5838 PDZK1    | ENST00000417171 | p.M170I  | c.510       | 0.023699493 | 5.399 | 1 |

|      |         |                 |         |        |             |       |   |
|------|---------|-----------------|---------|--------|-------------|-------|---|
| 5839 | TAS2R39 | ENST00000446620 | p.F142L | c.426  | 0.087352936 | 3.517 | 1 |
| 5839 | TAS2R39 | ENST00000446620 | p.S253I | c.758  | 0.087352936 | 0     | 1 |
| 5840 | NPC1L1  | ENST00000289547 | p.A165V | c.494  | 0.050625217 | 5.304 | 1 |
| 5840 | NPC1L1  | ENST00000289547 | p.W202R | c.604  | 1.025312609 | 0     | 1 |
| 5840 | NPC1L1  | ENST00000289547 | p.W202C | c.606  | 1.025312609 | 0     | 1 |
| 5841 | PPIB    | ENST00000300026 | p.K41I  | c.122  | 0.071694189 | 3.802 | 1 |
| 5841 | PPIB    | ENST00000300026 | p.R190Q | c.569  | 0.071694189 | 0     | 1 |
| 5842 | TICAM1  | ENST00000248244 | p.Y395C | c.1184 | 0.157781504 | 0     | 1 |
| 5842 | TICAM1  | ENST00000248244 | p.S449L | c.1346 | 0.157781504 | 2.664 | 1 |
| 5843 | ADAR    | ENST00000292205 | p.L334P | c.1001 | 0.04603899  | 0     | 1 |
| 5843 | ADAR    | ENST00000292205 | p.A375D | c.1124 | 0.04603899  | 4.441 | 1 |
| 5844 | P2RY1   | ENST00000305097 | p.D116N | c.346  | 0.17206195  | 3.539 | 1 |
| 5844 | P2RY1   | ENST00000305097 | p.R195H | c.584  | 1.086030975 | 0     | 2 |

**Supplementary Table 4. Inter-molecular clusters with annotations**

| Cluster ID | Gene      | Transcript (Ensembl74) | HGVS Protein Annotation    | HGVS Coding Position | Closeness Centrality | Geodesic from Centroid | No. of Patient Samples |
|------------|-----------|------------------------|----------------------------|----------------------|----------------------|------------------------|------------------------|
| 0          | ASB9      | ENST00000380488        | p.S257P                    | c.769                | 0.021345867          | 11.917                 | 1                      |
| 0          | SOCS4     | ENST00000395472        | p.R383W                    | c.1147               | 0.099119113          | 10.045                 | 1                      |
| 0          | TCEB1     | ENST00000522337        | p.S67L                     | c.200                | 0.221677401          | 11.554                 | 1                      |
| 0          | TCEB1     | ENST00000522337        | p.Y79N                     | c.235                | 2.837601759          | 4.429                  | 1                      |
| 0          | TCEB1     | ENST00000522337        | p.Y79F                     | c.236                | 2.837601759          | 4.429                  | 1                      |
| 0          | TCEB1     | ENST00000522337        | p.Y79S                     | c.236                | 2.837601759          | 4.429                  | 1                      |
| 0          | TCEB1     | ENST00000522337        | p.R82C                     | c.244                | 0.089629197          | 14.297                 | 1                      |
| 0          | TCEB1     | ENST00000522337        | p.S86G                     | c.256                | 0.13247423           | 14.157                 | 1                      |
| 0          | VHL       | ENST00000256474        | p.G114R                    | c.340                | 1.415934619          | 8.034                  | 2                      |
| 0          | VHL       | ENST00000256474        | p.L153P                    | c.458                | 1.167475645          | 9.105                  | 2                      |
| 0          | VHL       | ENST00000256474        | p.L158V                    | c.472                | 4.167378214          | 0                      | 3                      |
| 0          | VHL       | ENST00000256474        | p.L158P                    | c.473                | 4.167378214          | 0                      | 2                      |
| 0          | VHL       | ENST00000256474        | p.C162R                    | c.484                | 2.25560293           | 8.329                  | 1                      |
| 0          | VHL       | ENST00000256474        | p.C162F                    | c.485                | 2.25560293           | 8.329                  | 1                      |
| 0          | VHL       | ENST00000256474        | p.C162Y                    | c.485                | 2.25560293           | 8.329                  | 1                      |
| 0          | VHL       | ENST00000256474        | p.V165D                    | c.494                | 0.289378379          | 8.169                  | 1                      |
| 0          | VHL       | ENST00000256474        | p.S168C                    | c.502                | 0.02513302           | 11.681                 | 1                      |
| 0          | VHL       | ENST00000256474        | p.L169P                    | c.506                | 2.07389913           | 10.484                 | 3                      |
| 1          | LDB1      | ENST00000425280        | p.E355K                    | c.1063               | 0.041358859          | 9.028                  | 1                      |
| 1          | LMO2      | ENST00000257818        | p.R138L                    | c.413                | 0.042047261          | 14.767                 | 1                      |
| 1          | LMO2      | ENST00000257818        | p.R146Q                    | c.437                | 0.162058542          | 0                      | 1                      |
| 1          | LMO2      | ENST00000257818        | p.R150W                    | c.448                | 0.022977926          | 14.673                 | 1                      |
| 1          | TAL1      | ENST00000371883        | p.F240L                    | c.720                | 0.081670168          | 3.902                  | 1                      |
| 1          | TAL1      | ENST00000371883        | p.D247E                    | c.741                | 0.094839587          | 3.501                  | 1                      |
| 1          | TAL1      | ENST00000371883        | p.E250K                    | c.748                | 0.004958992          | 7.867                  | 1                      |
| 1          | TCF3      | ENST00000395423        | p.L576M                    | c.1726               | 0.009067627          | 10.789                 | 1                      |
| 2          | HIST1H2AE | ENST00000303910        | p.A53V                     | c.158                | 0.022577137          | 17.557                 | 1                      |
| 2          | HIST1H2AE | ENST00000303910        | p.A22T                     | c.64                 | 1.105733219          | 0                      | 1                      |
| 2          | HIST1H2AE | ENST00000303910        | p.A22V                     | c.65                 | 1.105733219          | 0                      | 1                      |
| 2          | HIST1H2BA | ENST00000274764        | p.TKAVTKYTS117in_frame_del | c.347_373            | 1.008946033          | 8.136                  | 1                      |
| 2          | HIST1H2BA | ENST00000274764        | p.T117A                    | c.349                | 1.008946033          | 8.136                  | 1                      |
| 2          | HIST1H2BJ | ENST00000541790        | p.K121E                    | c.361                | 0.197937855          | 3.342                  | 1                      |
| 3          | CDK2      | ENST00000553376        | p.K34T                     | c.101                | 0.008947725          | 7.814                  | 1                      |
| 3          | CDK2      | ENST00000553376        | p.G13D                     | c.38                 | 0.040170053          | 4.646                  | 1                      |
| 3          | CDK2      | ENST00000553376        | p.K20E                     | c.58                 | 0.036476549          | 9.636                  | 1                      |
| 3          | CDKN1B    | ENST00000396340        | p.D63E                     | c.189                | 0.009794241          | 16.438                 | 1                      |
| 3          | CDKN1B    | ENST00000396340        | p.E78K                     | c.232                | 0.036872911          | 14.468                 | 1                      |

|    |          |                 |          |         |             |        |   |
|----|----------|-----------------|----------|---------|-------------|--------|---|
| 3  | CDKN1B   | ENST00000396340 | p.K81R   | c.242   | 0.045696591 | 0      | 1 |
| 4  | HBA2     | ENST00000251595 | p.L35M   | c.103   | 0.421662862 | 0      | 1 |
| 4  | HBB      | ENST00000335295 | p.E8D    | c.24    | 0.050830748 | 4.768  | 1 |
| 4  | HBB      | ENST00000335295 | p.P126T  | c.376   | 0.214880288 | 2.54   | 1 |
| 4  | HBB      | ENST00000335295 | p.A129S  | c.385   | 0.234417973 | 2.393  | 1 |
| 4  | HBE1     | ENST00000380237 | p.E7K    | c.19    | 0.004826262 | 8.199  | 1 |
| 4  | HBE1     | ENST00000380237 | p.K133N  | c.399   | 0.003407999 | 8.702  | 1 |
| 4  | HBG1     | ENST00000330597 | p.V135M  | c.403   | 0.023640439 | 5.893  | 1 |
| 5  | MTERFD2  | ENST00000391980 | p.Q275K  | c.823   | 0.001171847 | 9.737  | 1 |
| 5  | NSUN4    | ENST00000474844 | p.L45F   | c.135   | 0.001171847 | 0      | 1 |
| 6  | KMT2D    | ENST00000301067 | p.A5339V | c.16016 | 0.008502785 | 0      | 1 |
| 6  | WDR5     | ENST00000358625 | p.D92N   | c.274   | 0.004147036 | 7.92   | 1 |
| 6  | WDR5     | ENST00000358625 | p.G147E  | c.440   | 0.002766494 | 8.506  | 1 |
| 6  | WDR5     | ENST00000358625 | p.D150G  | c.449   | 0.001634303 | 9.267  | 1 |
| 7  | IL20     | ENST00000367098 | p.L106F  | c.316   | 0.001295919 | 9.594  | 1 |
| 7  | IL20     | ENST00000367098 | p.R107W  | c.319   | 0.001521664 | 9.362  | 1 |
| 7  | IL20RB   | ENST00000329582 | p.Q71R   | c.212   | 0.00281365  | 0      | 1 |
| 8  | RAB1B    | ENST00000311481 | p.V130A  | c.389   | 0.115852001 | 0      | 1 |
| 8  | TBC1D20  | ENST00000461304 | p.N190K  | c.570   | 0.113364473 | 3.145  | 1 |
| 8  | TBC1D20  | ENST00000461304 | p.P304S  | c.910   | 0.00312163  | 8.478  | 1 |
| 9  | RPL15    | ENST00000354811 | p.R44Q   | c.131   | 0.000286214 | 11.778 | 1 |
| 9  | RPL15    | ENST00000354811 | p.R49G   | c.145   | 0.000970644 | 12.618 | 1 |
| 9  | RPL15    | ENST00000354811 | p.Q8R    | c.23    | 0.005144207 | 7.607  | 1 |
| 9  | RPL15    | ENST00000354811 | p.E9K    | c.25    | 0.002619271 | 8.584  | 1 |
| 9  | RPL7A    | ENST00000323345 | p.F169L  | c.507   | 0.008179113 | 0      | 1 |
| 10 | NR1I3    | ENST00000367980 | p.D291N  | c.871   | 0.011960055 | 18.202 | 1 |
| 10 | NR1I3    | ENST00000367980 | p.R329W  | c.985   | 0.147249329 | 5.286  | 1 |
| 10 | PPARG    | ENST00000287820 | p.E352K  | c.1054  | 0.042924769 | 6.877  | 1 |
| 10 | PPARG    | ENST00000287820 | p.T468A  | c.1402  | 0.242051211 | 5.892  | 1 |
| 10 | RXRA     | ENST00000481739 | p.R421H  | c.1262  | 0.032305341 | 11.787 | 1 |
| 10 | RXRA     | ENST00000481739 | p.R426H  | c.1277  | 0.161907649 | 8.733  | 1 |
| 10 | RXRA     | ENST00000481739 | p.S427Y  | c.1280  | 4.053860453 | 0      | 1 |
| 10 | RXRA     | ENST00000481739 | p.S427F  | c.1280  | 4.053860453 | 0      | 4 |
| 10 | RXRA     | ENST00000481739 | p.G429V  | c.1286  | 0.010926881 | 11.988 | 1 |
| 11 | HIST1H3D | ENST00000377831 | p.R27G   | c.79    | 1.146746507 | 0      | 2 |
| 11 | HIST1H3D | ENST00000377831 | p.K28M   | c.83    | 0.008773972 | 9.995  | 1 |
| 11 | HIST1H3J | ENST00000359303 | p.K28R   | c.83    | 0.008773972 | 9.995  | 1 |
| 11 | TRIM24   | ENST00000343526 | p.E978K  | c.2932  | 0.303109715 | 2.788  | 1 |
| 12 | B2M      | ENST00000544417 | p.H51P   | c.152   | 0.140582605 | 8.218  | 1 |

|    |         |                 |          |           |             |        |    |
|----|---------|-----------------|----------|-----------|-------------|--------|----|
| 12 | CD1A    | ENST00000289429 | p.S34C   | c.101     | 0.015197268 | 16.21  | 1  |
| 12 | CD1A    | ENST00000289429 | p.A33T   | c.97      | 2.003796585 | 0      | 3  |
| 12 | CD1D    | ENST00000368171 | p.Q137H  | c.411     | 0.114663354 | 11.384 | 1  |
| 12 | HFE     | ENST00000357618 | p.G36C   | c.106     | 0.005982804 | 15.786 | 1  |
| 12 | MR1     | ENST00000367580 | p.A135V  | c.404     | 0.011142367 | 14.883 | 1  |
| 13 | DCLRE1C | ENST00000378278 | p.V491L  | c.1471    | 0.012098692 | 6.645  | 1  |
| 13 | DCLRE1C | ENST00000378278 | p.R495T  | c.1484    | 0.04966399  | 4.346  | 1  |
| 13 | LIG4    | ENST00000405925 | p.S45Y   | c.134     | 0.059180868 | 0      | 1  |
| 13 | LIG4    | ENST00000405925 | p.P15R   | c.44      | 0.00163142  | 15.919 | 1  |
| 14 | CAND1   | ENST00000545606 | p.E1167Q | c.3499    | 0.011271229 | 6.504  | 1  |
| 14 | CAND1   | ENST00000545606 | p.D1170N | c.3508    | 0.023240882 | 5.443  | 1  |
| 14 | CUL1    | ENST00000602748 | p.H280Y  | c.838     | 0.034005558 | 0      | 1  |
| 15 | SPTA1   | ENST00000368147 | p.R28H   | c.83      | 0.128375016 | 10.523 | 1  |
| 15 | SPTA1   | ENST00000368147 | p.E30K   | c.88      | 1.008052307 | 0      | 2  |
| 15 | SPTA1   | ENST00000368147 | p.T33I   | c.98      | 0.016472264 | 13.185 | 1  |
| 15 | SPTB    | ENST00000556626 | p.F2014L | c.6042    | 0.048031764 | 15.517 | 1  |
| 15 | SPTB    | ENST00000556626 | p.E2022Q | c.6064    | 0.126112728 | 7.109  | 1  |
| 16 | CDK6    | ENST00000265734 | p.T154S  | c.460     | 0.054221168 | 5.205  | 1  |
| 16 | CDKN2A  | ENST00000361570 | p.G143E  | c.428     | 1.027110584 | 0      | 2  |
| 16 | CDKN2A  | ENST00000361570 | p.G143K  | c.428_427 | 1.027110584 | 0      | 2  |
| 17 | PPP1CA  | ENST00000312989 | p.E137D  | c.411     | 0.001080998 | 13.494 | 1  |
| 17 | PPP1CA  | ENST00000312989 | p.Y148C  | c.443     | 0.056259762 | 11.281 | 1  |
| 17 | PPP1CA  | ENST00000312989 | p.D205N  | c.613     | 0.09485896  | 0      | 1  |
| 17 | PPP1R8  | ENST00000311772 | p.F169L  | c.507     | 0.063649347 | 7.118  | 1  |
| 17 | PPP1R8  | ENST00000311772 | p.S178C  | c.533     | 0.088828374 | 3.52   | 1  |
| 18 | NHEJ1   | ENST00000409720 | p.R109Q  | c.326     | 1.027469986 | 0      | 2  |
| 18 | XRCC4   | ENST00000338635 | p.A60T   | c.178     | 0.054939973 | 5.186  | 1  |
| 19 | TP53    | ENST00000445888 | p.Y163H  | c.487     | 11.02596838 | 13.933 | 1  |
| 19 | TP53    | ENST00000445888 | p.Y163N  | c.487     | 11.02596838 | 13.933 | 1  |
| 19 | TP53    | ENST00000445888 | p.Y163C  | c.488     | 11.02596838 | 13.933 | 10 |
| 19 | TP53    | ENST00000445888 | p.H168L  | c.503     | 3.341965517 | 10.146 | 2  |
| 19 | TP53    | ENST00000445888 | p.H168P  | c.503     | 3.341965517 | 10.146 | 1  |
| 19 | TP53    | ENST00000445888 | p.H168R  | c.503     | 3.341965517 | 10.146 | 1  |
| 19 | TP53    | ENST00000445888 | p.E171K  | c.511     | 1.152126294 | 11.383 | 2  |
| 19 | TP53    | ENST00000445888 | p.S241P  | c.721     | 13.01770902 | 14.489 | 1  |
| 19 | TP53    | ENST00000445888 | p.S241C  | c.722     | 13.01770902 | 14.489 | 3  |
| 19 | TP53    | ENST00000445888 | p.S241F  | c.722     | 13.01770902 | 14.489 | 9  |
| 19 | TP53    | ENST00000445888 | p.S241Y  | c.722     | 13.01770902 | 14.489 | 1  |
| 19 | TP53    | ENST00000445888 | p.C242S  | c.724     | 7.027628461 | 13.849 | 1  |

|    |         |                 |                       |           |             |        |    |
|----|---------|-----------------|-----------------------|-----------|-------------|--------|----|
| 19 | TP53    | ENST00000445888 | p.C242F               | c.725     | 7.027628461 | 13.849 | 5  |
| 19 | TP53    | ENST00000445888 | p.C242Y               | c.725     | 7.027628461 | 13.849 | 2  |
| 19 | TP53    | ENST00000445888 | p.G244C               | c.730     | 12.0576284  | 12.756 | 4  |
| 19 | TP53    | ENST00000445888 | p.G244R               | c.730     | 12.0576284  | 12.756 | 1  |
| 19 | TP53    | ENST00000445888 | p.G244S               | c.730     | 12.0576284  | 12.756 | 3  |
| 19 | TP53    | ENST00000445888 | p.G244D               | c.731     | 12.0576284  | 12.756 | 4  |
| 19 | TP53    | ENST00000445888 | p.G245C               | c.733     | 42.07107215 | 12.277 | 3  |
| 19 | TP53    | ENST00000445888 | p.G245R               | c.733     | 42.07107215 | 12.277 | 2  |
| 19 | TP53    | ENST00000445888 | p.G245S               | c.733     | 42.07107215 | 12.277 | 21 |
| 19 | TP53    | ENST00000445888 | p.G245D               | c.734     | 42.07107215 | 12.277 | 8  |
| 19 | TP53    | ENST00000445888 | p.G245V               | c.734     | 42.07107215 | 12.277 | 9  |
| 19 | TP53    | ENST00000445888 | p.GGM244in_frame_delV | c.736_731 | 12.0576284  | 12.756 | 1  |
| 19 | TP53    | ENST00000445888 | p.M246R               | c.737     | 1.089054703 | 12.163 | 1  |
| 19 | TP53    | ENST00000445888 | p.M246I               | c.738     | 1.089054703 | 12.163 | 1  |
| 19 | TP53    | ENST00000445888 | p.N247I               | c.740     | 0.620920793 | 9.378  | 1  |
| 19 | TP53    | ENST00000445888 | p.R248G               | c.742     | 93.0675064  | 0      | 1  |
| 19 | TP53    | ENST00000445888 | p.R248W               | c.742     | 93.0675064  | 0      | 42 |
| 19 | TP53    | ENST00000445888 | p.R248W               | c.742_741 | 93.0675064  | 0      | 42 |
| 19 | TP53    | ENST00000445888 | p.R248L               | c.743     | 93.0675064  | 0      | 2  |
| 19 | TP53    | ENST00000445888 | p.R248P               | c.743     | 93.0675064  | 0      | 3  |
| 19 | TP53    | ENST00000445888 | p.R248Q               | c.743     | 93.0675064  | 0      | 46 |
| 19 | TP53    | ENST00000445888 | p.R249G               | c.745     | 19.24071927 | 10.304 | 6  |
| 19 | TP53    | ENST00000445888 | p.R249W               | c.745     | 19.24071927 | 10.304 | 2  |
| 19 | TP53    | ENST00000445888 | p.R249M               | c.746     | 19.24071927 | 10.304 | 5  |
| 19 | TP53    | ENST00000445888 | p.R249T               | c.746     | 19.24071927 | 10.304 | 1  |
| 19 | TP53    | ENST00000445888 | p.R249S               | c.747     | 19.24071927 | 10.304 | 6  |
| 19 | TP53    | ENST00000445888 | p.P250L               | c.749     | 6.012770546 | 14.97  | 7  |
| 19 | TP53    | ENST00000445888 | p.P250L               | c.750_749 | 6.012770546 | 14.97  | 7  |
| 19 | TP53BP1 | ENST00000382044 | p.Y1848C              | c.5543    | 0.02924737  | 15.154 | 1  |
| 19 | TP53BP1 | ENST00000382044 | p.I1864V              | c.5590    | 1.93763312  | 5.601  | 1  |
| 19 | TP53BP2 | ENST00000343537 | p.D956H               | c.2866    | 4.001016126 | 6.362  | 1  |
| 20 | PIK3CA  | ENST00000263967 | p.V344M               | c.1030    | 8.371794736 | 7.746  | 4  |
| 20 | PIK3CA  | ENST00000263967 | p.V344A               | c.1031    | 8.371794736 | 7.746  | 2  |
| 20 | PIK3CA  | ENST00000263967 | p.V344G               | c.1031    | 8.371794736 | 7.746  | 3  |
| 20 | PIK3CA  | ENST00000263967 | p.N345I               | c.1034    | 24.77404515 | 0      | 1  |
| 20 | PIK3CA  | ENST00000263967 | p.N345T               | c.1034    | 24.77404515 | 0      | 1  |
| 20 | PIK3CA  | ENST00000263967 | p.N345K               | c.1035    | 24.77404515 | 0      | 22 |
| 20 | PIK3CA  | ENST00000263967 | p.D350N               | c.1048    | 5.219697891 | 8.632  | 2  |
| 20 | PIK3CA  | ENST00000263967 | p.D350G               | c.1049    | 5.219697891 | 8.632  | 4  |



|    |        |                 |                             |             |             |        |    |
|----|--------|-----------------|-----------------------------|-------------|-------------|--------|----|
| 20 | PIK3CA | ENST00000263967 | p.R412Q                     | c.1235      | 0.149154824 | 19.584 | 1  |
| 20 | PIK3CA | ENST00000263967 | p.C420G                     | c.1258      | 12.98691233 | 7.596  | 1  |
| 20 | PIK3CA | ENST00000263967 | p.C420R                     | c.1258      | 12.98691233 | 7.596  | 12 |
| 20 | PIK3CA | ENST00000263967 | p.PVPHGLEDL447in_frame_del  | c.1338_1364 | 1.184172503 | 8.874  | 2  |
| 20 | PIK3CA | ENST00000263967 | p.HGLEDLLNP450in_frame_del  | c.1345_1371 | 0.672357857 | 12.009 | 1  |
| 20 | PIK3CA | ENST00000263967 | p.P449L                     | c.1346      | 0.410995089 | 11.789 | 1  |
| 20 | PIK3CA | ENST00000263967 | p.G451R                     | c.1351      | 1.205211139 | 16.74  | 1  |
| 20 | PIK3CA | ENST00000263967 | p.G451V                     | c.1352      | 1.205211139 | 16.74  | 1  |
| 20 | PIK3CA | ENST00000263967 | p.E453K                     | c.1357      | 11.43198762 | 8.957  | 8  |
| 20 | PIK3CA | ENST00000263967 | p.E453Q                     | c.1357      | 11.43198762 | 8.957  | 2  |
| 20 | PIK3CA | ENST00000263967 | p.E453D                     | c.1359      | 11.43198762 | 8.957  | 1  |
| 20 | PIK3CA | ENST00000263967 | p.D454Y                     | c.1360      | 0.170822834 | 17.241 | 1  |
| 20 | PIK3CA | ENST00000263967 | p.P471A                     | c.1411      | 2.113757056 | 8.731  | 1  |
| 20 | PIK3CA | ENST00000263967 | p.P471L                     | c.1412      | 2.113757056 | 8.731  | 2  |
| 20 | PIK3R1 | ENST00000396611 | p.SREYD460in_frame_del      | c.1378_1392 | 0.022291475 | 18.226 | 1  |
| 20 | PIK3R1 | ENST00000396611 | p.DRLY464in_frame_del       | c.1386_1397 | 3.129769274 | 15.289 | 1  |
| 20 | PIK3R1 | ENST00000396611 | p.D464N                     | c.1390      | 3.129769274 | 15.289 | 2  |
| 20 | PIK3R1 | ENST00000396611 | p.D464V                     | c.1391      | 3.129769274 | 15.289 | 1  |
| 20 | PIK3R1 | ENST00000396611 | p.RLY465in_frame_del        | c.1391_1399 | 0.014100342 | 18.891 | 1  |
| 20 | PIK3R1 | ENST00000396611 | p.EIDK558in_frame_del       | c.1671_1682 | 0.511115701 | 5.655  | 1  |
| 20 | PIK3R1 | ENST00000396611 | p.I559V                     | c.1675      | 1.245324175 | 6.714  | 1  |
| 20 | PIK3R1 | ENST00000396611 | p.I559T                     | c.1676      | 1.245324175 | 6.714  | 1  |
| 20 | PIK3R1 | ENST00000396611 | p.D560H                     | c.1678      | 6.013880515 | 2.795  | 1  |
| 20 | PIK3R1 | ENST00000396611 | p.D560G                     | c.1679      | 6.013880515 | 2.795  | 2  |
| 20 | PIK3R1 | ENST00000396611 | p.MNSIKPDL563in_frame_dell  | c.1688_1708 | 1.544219884 | 6.543  | 1  |
| 20 | PIK3R1 | ENST00000396611 | p.NSIKPDLIQL564in_frame_del | c.1688_1717 | 10.78385116 | 2.645  | 1  |
| 20 | PIK3R1 | ENST00000396611 | p.MN563in_frame_dell        | c.1689_1691 | 1.544219884 | 6.543  | 1  |
| 20 | PIK3R1 | ENST00000396611 | p.N564D                     | c.1690      | 10.78385116 | 2.645  | 5  |
| 20 | PIK3R1 | ENST00000396611 | p.NSIKP564in_frame_delT     | c.1691_1702 | 10.78385116 | 2.645  | 1  |
| 20 | PIK3R1 | ENST00000396611 | p.KPDL567in_frame_del       | c.1697_1708 | 5.941609039 | 11.416 | 2  |
| 20 | PIK3R1 | ENST00000396611 | p.K567in_frame_del          | c.1698_1700 | 5.941609039 | 11.416 | 1  |
| 20 | PIK3R1 | ENST00000396611 | p.K567E                     | c.1699      | 5.941609039 | 11.416 | 2  |
| 20 | PIK3R1 | ENST00000396611 | p.P568T                     | c.1702      | 1.606340704 | 11.097 | 1  |
| 20 | PIK3R1 | ENST00000396611 | p.LIQLRKTRD570in_frame_del  | c.1704_1730 | 0.669753006 | 13.437 | 1  |
| 20 | PIK3R1 | ENST00000396611 | p.IQLRKTR571in_frame_del    | c.1711_1731 | 2.115936557 | 11.788 | 1  |
| 20 | PIK3R1 | ENST00000396611 | p.Q572R                     | c.1715      | 0.155821183 | 15.797 | 1  |
| 20 | PIK3R1 | ENST00000396611 | p.R574in_frame_del          | c.1719_1721 | 4.394678202 | 11.289 | 2  |
| 20 | PIK3R1 | ENST00000396611 | p.KTR575in_frame_del        | c.1719_1727 | 2.280134625 | 14.869 | 1  |
| 20 | PIK3R1 | ENST00000396611 | p.R574in_frame_del          | c.1720_1722 | 4.394678202 | 11.289 | 2  |

|    |          |                 |                          |             |             |        |   |
|----|----------|-----------------|--------------------------|-------------|-------------|--------|---|
| 20 | PIK3R1   | ENST00000396611 | p.R574T                  | c.1721      | 4.394678202 | 11.289 | 1 |
| 20 | PIK3R1   | ENST00000396611 | p.KT575in_frame_del      | c.1723_1728 | 2.280134625 | 14.869 | 1 |
| 20 | PIK3R1   | ENST00000396611 | p.KTRDQYL575in_frame_del | c.1723_1743 | 2.280134625 | 14.869 | 1 |
| 21 | CBL      | ENST00000264033 | p.C384W                  | c.1152      | 0.045974123 | 5.24   | 1 |
| 21 | CBLB     | ENST00000264122 | p.W400R                  | c.1198      | 0.02398647  | 5.42   | 1 |
| 21 | UBE2D2   | ENST00000398733 | p.P61S                   | c.181       | 0.050317795 | 0      | 1 |
| 21 | UBE2L3   | ENST00000545681 | p.S4G                    | c.10        | 0.042920434 | 11     | 1 |
| 21 | UBE3A    | ENST00000397954 | p.I682V                  | c.2044      | 0.016161249 | 16.99  | 1 |
| 21 | UBE3A    | ENST00000397954 | p.Q684H                  | c.2052      | 0.003102143 | 19.389 | 1 |
| 21 | UBE3A    | ENST00000397954 | p.Y694C                  | c.2081      | 0.003417268 | 19.249 | 1 |
| 21 | UBE3A    | ENST00000397954 | p.D701I                  | c.2102_2101 | 0.002044401 | 19.992 | 1 |
| 22 | CRADD    | ENST00000332896 | p.R147C                  | c.439       | 0.061864578 | 5.115  | 1 |
| 22 | CRADD    | ENST00000332896 | p.R170H                  | c.509       | 0.00248363  | 9.674  | 1 |
| 22 | PIDD     | ENST00000347755 | p.R798C                  | c.2392      | 1.030198583 | 0      | 2 |
| 22 | PIDD     | ENST00000347755 | p.R825W                  | c.2473      | 0.005122078 | 13.04  | 1 |
| 23 | CPA4     | ENST00000222482 | p.G166E                  | c.497       | 0.004541608 | 8.63   | 1 |
| 23 | CPA4     | ENST00000222482 | p.R236L                  | c.707       | 0.012548311 | 6.32   | 1 |
| 23 | LXN      | ENST00000264265 | p.R214C                  | c.640       | 0.001990901 | 17.606 | 1 |
| 23 | LXN      | ENST00000264265 | p.K217N                  | c.651       | 0.015045856 | 0      | 1 |
| 24 | RPL19    | ENST00000225430 | p.R52C                   | c.154       | 5.80E-05    | 14.074 | 1 |
| 24 | RPL19    | ENST00000225430 | p.D25H                   | c.73        | 3.64E-05    | 14.744 | 1 |
| 24 | RPL22    | ENST00000234875 | p.R101H                  | c.302       | 9.44E-05    | 0      | 1 |
| 25 | GINS3    | ENST00000426538 | p.E17D                   | c.51        | 0.006406741 | 7.292  | 1 |
| 25 | GINS3    | ENST00000426538 | p.D24G                   | c.71        | 0.00405854  | 7.954  | 1 |
| 25 | GINS4    | ENST00000276533 | p.P163S                  | c.487       | 0.010413815 | 0      | 1 |
| 26 | ARHGAP1  | ENST00000311956 | p.A406V                  | c.1217      | 0.104630207 | 10.362 | 1 |
| 26 | ARHGAP1  | ENST00000311956 | p.I408V                  | c.1222      | 0.01383768  | 13.395 | 1 |
| 26 | ARHGAP20 | ENST00000260283 | p.P515A                  | c.1543      | 0.031184796 | 12.684 | 1 |
| 26 | ARHGEF11 | ENST00000368194 | p.A963V                  | c.2888      | 2.008668198 | 0      | 3 |
| 26 | RHOA     | ENST00000418115 | p.Q63K                   | c.187       | 0.092342082 | 19.647 | 1 |
| 26 | RHOA     | ENST00000418115 | p.L69P                   | c.206       | 0.154273267 | 7.028  | 1 |
| 28 | BROX     | ENST00000340934 | p.P206N                  | c.616_617   | 0.010280113 | 0      | 1 |
| 28 | CHMP5    | ENST00000223500 | p.D204N                  | c.610       | 0.010280113 | 6.604  | 1 |
| 29 | DCAF12   | ENST00000361264 | p.R53W                   | c.157       | 1.015980449 | 7.74   | 1 |
| 29 | DCAF12   | ENST00000361264 | p.R53P                   | c.158       | 1.015980449 | 7.74   | 1 |
| 29 | DCAF6    | ENST00000367840 | p.L19P                   | c.56        | 0.20978494  | 3.364  | 1 |
| 29 | DCAF8    | ENST00000556710 | p.P310S                  | c.928       | 0.000997461 | 12.437 | 1 |
| 29 | DCAF8    | ENST00000556710 | p.R315W                  | c.943       | 0.017880712 | 8.218  | 1 |
| 29 | DDB1     | ENST00000301764 | p.S386Y                  | c.1157      | 0.000691875 | 14.131 | 1 |

|    |         |                 |          |        |             |        |   |
|----|---------|-----------------|----------|--------|-------------|--------|---|
| 29 | DDB1    | ENST00000301764 | p.P721L  | c.2162 | 0.01195675  | 10.171 | 1 |
| 29 | DDB1    | ENST00000301764 | p.E1002K | c.3004 | 0.005251533 | 13.66  | 1 |
| 29 | DDB1    | ENST00000301764 | p.V1004I | c.3010 | 0.018843869 | 12.033 | 1 |
| 29 | DDB1    | ENST00000301764 | p.G1035S | c.3103 | 0.003346967 | 12.722 | 1 |
| 29 | DDB1    | ENST00000301764 | p.R327C  | c.979  | 1.111407007 | 0      | 2 |
| 30 | GGA1    | ENST00000381756 | p.T305I  | c.914  | 0.04623086  | 0      | 1 |
| 30 | RABEP1  | ENST00000262477 | p.L562M  | c.1684 | 0.04623086  | 4.435  | 1 |
| 31 | CACNA1C | ENST00000406454 | p.A1564S | c.4690 | 0.018300325 | 18.606 | 1 |
| 31 | CACNA1C | ENST00000406454 | p.K1617N | c.4851 | 0.096920203 | 18.503 | 1 |
| 31 | CALM1   | ENST00000447653 | p.E84K   | c.250  | 0.188916836 | 19.169 | 1 |
| 31 | CALM3   | ENST00000291295 | p.M73I   | c.219  | 0.290989274 | 11.448 | 1 |
| 31 | CALM3   | ENST00000291295 | p.M145I  | c.435  | 0.419020213 | 4.212  | 1 |
| 31 | CAMK2D  | ENST00000511664 | p.R297T  | c.890  | 0.156459491 | 7.265  | 1 |
| 31 | CAMK2D  | ENST00000511664 | p.I304T  | c.911  | 0.066909111 | 8.568  | 1 |
| 31 | DAPK1   | ENST00000469640 | p.R310C  | c.928  | 1.070744069 | 0      | 2 |
| 31 | DAPK1   | ENST00000469640 | p.R317I  | c.950  | 0.018838175 | 17.53  | 1 |
| 31 | MYLK2   | ENST00000375985 | p.A578T  | c.1732 | 0.111103883 | 15.291 | 1 |
| 31 | MYLK2   | ENST00000375985 | p.R581C  | c.1741 | 0.264980101 | 16.578 | 1 |
| 31 | NGFR    | ENST00000172229 | p.A400T  | c.1198 | 0.126788136 | 14.818 | 1 |
| 31 | PPP3CA  | ENST00000394854 | p.R397K  | c.1190 | 0.231854306 | 7.116  | 1 |
| 32 | COL2A1  | ENST00000380518 | p.G1170S | c.3508 | 0.126009066 | 3.143  | 1 |
| 32 | PMEL    | ENST00000360714 | p.W52C   | c.156  | 0.009812421 | 6.956  | 1 |
| 33 | MAPK1   | ENST00000398822 | p.N257S  | c.770  | 0.030792314 | 5.028  | 1 |
| 33 | MAPK1   | ENST00000398822 | p.N262T  | c.785  | 0.00480767  | 7.744  | 1 |
| 33 | PEA15   | ENST00000368076 | p.R93H   | c.278  | 0.035314044 | 0      | 1 |
| 34 | LY96    | ENST00000284818 | p.R90C   | c.268  | 1.278335779 | 0      | 2 |
| 34 | LY96    | ENST00000284818 | p.K125Q  | c.373  | 1.116786255 | 11.679 | 2 |
| 34 | TLR4    | ENST00000355622 | p.S415I  | c.1244 | 0.013207932 | 18.999 | 1 |
| 34 | TLR4    | ENST00000355622 | p.F418L  | c.1254 | 0.018591619 | 18.504 | 1 |
| 34 | TLR4    | ENST00000355622 | p.L419F  | c.1257 | 0.152620053 | 15.421 | 1 |
| 34 | TLR4    | ENST00000355622 | p.E439K  | c.1315 | 1.26772085  | 2.91   | 1 |
| 34 | TLR4    | ENST00000355622 | p.E439A  | c.1316 | 1.26772085  | 2.91   | 1 |
| 34 | TLR4    | ENST00000355622 | p.F440L  | c.1318 | 0.081216245 | 6.429  | 1 |
| 35 | PLXNB1  | ENST00000296440 | p.D1736N | c.5206 | 0.080658059 | 7.217  | 1 |
| 35 | RAC1    | ENST00000356142 | p.P29S   | c.85   | 11.0067215  | 0      | 9 |
| 35 | RAC1    | ENST00000356142 | p.P29T   | c.85   | 11.0067215  | 0      | 1 |
| 35 | RAC1    | ENST00000356142 | p.P29L   | c.86   | 11.0067215  | 0      | 2 |
| 36 | NXF1    | ENST00000532297 | p.R78L   | c.233  | 0.019505165 | 0      | 1 |
| 36 | TNPO1   | ENST00000337273 | p.C285Y  | c.854  | 0.019505165 | 5.68   | 1 |

|    |        |                 |          |        |             |        |   |
|----|--------|-----------------|----------|--------|-------------|--------|---|
| 37 | EEF1A2 | ENST00000298049 | p.A355T  | c.1063 | 0.069255291 | 6.659  | 1 |
| 37 | ITGB3  | ENST00000559488 | p.S61L   | c.182  | 0.020303575 | 16.581 | 1 |
| 37 | MBP    | ENST00000355994 | p.R231C  | c.691  | 0.087500475 | 3.572  | 1 |
| 38 | CALM1  | ENST00000447653 | p.D135N  | c.403  | 0.115428345 | 3.124  | 1 |
| 38 | CALM2  | ENST00000409563 | p.G180A  | c.539  | 0.007029618 | 7.309  | 1 |
| 38 | MYO1C  | ENST00000359786 | p.P409L  | c.1226 | 0.121011244 | 0      | 1 |
| 39 | FGF1   | ENST00000359370 | p.G35D   | c.104  | 0.08217316  | 13.529 | 1 |
| 39 | FGF1   | ENST00000359370 | p.T111P  | c.331  | 0.010582812 | 14.021 | 1 |
| 39 | FGF1   | ENST00000359370 | p.L148F  | c.442  | 0.477565094 | 3.873  | 1 |
| 39 | FGF10  | ENST00000264664 | p.N159K  | c.477  | 0.020641322 | 13.046 | 1 |
| 39 | FGFR1  | ENST00000425967 | p.A201S  | c.601  | 0.014472672 | 10.537 | 1 |
| 39 | FGFR1  | ENST00000425967 | p.R281W  | c.841  | 0.113783346 | 7.49   | 1 |
| 39 | FGFR2  | ENST00000457416 | p.E163K  | c.487  | 1.012516237 | 19.931 | 2 |
| 39 | FGFR2  | ENST00000457416 | p.R165W  | c.493  | 0.0717777   | 19.233 | 1 |
| 39 | FGFR2  | ENST00000457416 | p.A168T  | c.502  | 0.176289559 | 6.906  | 1 |
| 39 | FGFR2  | ENST00000457416 | p.R251Q  | c.752  | 0.15939485  | 7.257  | 1 |
| 39 | FGFR3  | ENST00000340107 | p.R248C  | c.742  | 1.091529133 | 0      | 2 |
| 39 | FGFR4  | ENST00000502906 | p.V168D  | c.503  | 0.040294781 | 9.042  | 1 |
| 39 | SYT1   | ENST00000393240 | p.P247S  | c.739  | 0.078758807 | 18.782 | 1 |
| 40 | C8A    | ENST00000361249 | p.A221V  | c.662  | 0.118923675 | 0      | 1 |
| 40 | C8A    | ENST00000361249 | p.G224R  | c.670  | 0.007509758 | 10.432 | 1 |
| 40 | C8B    | ENST00000371237 | p.V427G  | c.1280 | 0.012624231 | 6.455  | 1 |
| 40 | C8B    | ENST00000371237 | p.R274Q  | c.821  | 0.114796248 | 3.227  | 1 |
| 41 | EGF    | ENST00000265171 | p.Y983C  | c.2948 | 0.023677539 | 10.435 | 1 |
| 41 | EGFR   | ENST00000275493 | p.L38V   | c.112  | 0.012215216 | 18.127 | 1 |
| 41 | EGFR   | ENST00000275493 | p.S380Y  | c.1139 | 0.106495543 | 16.642 | 1 |
| 41 | EGFR   | ENST00000275493 | p.E114K  | c.340  | 2.000735629 | 0      | 3 |
| 42 | BRCA2  | ENST00000544455 | p.V1542A | c.4625 | 0.063901783 | 0      | 1 |
| 42 | RAD51  | ENST00000382643 | p.A210V  | c.629  | 0.063901783 | 3.968  | 1 |
| 43 | CD4    | ENST00000011653 | p.T444P  | c.1330 | 0.043593496 | 0      | 1 |
| 43 | LCK    | ENST00000333070 | p.D12N   | c.34   | 0.022849276 | 5.482  | 1 |
| 43 | LCK    | ENST00000333070 | p.I17T   | c.50   | 0.010103408 | 6.677  | 1 |
| 43 | LCK    | ENST00000333070 | p.V19L   | c.55   | 0.011814063 | 6.449  | 1 |
| 44 | CBFB   | ENST00000412916 | p.P70S   | c.208  | 0.008645326 | 10.178 | 1 |
| 44 | CBFB   | ENST00000412916 | p.A99V   | c.296  | 0.011900651 | 9.714  | 1 |
| 44 | CBFB   | ENST00000412916 | p.I102N  | c.305  | 1.129098436 | 0      | 1 |
| 44 | CBFB   | ENST00000412916 | p.I102M  | c.306  | 1.129098436 | 0      | 1 |
| 44 | CBFB   | ENST00000412916 | p.N104S  | c.311  | 0.022441023 | 10.819 | 1 |
| 44 | RUNX1  | ENST00000300305 | p.P184L  | c.551  | 0.273652358 | 2.983  | 1 |

|    |         |                 |          |        |             |        |   |
|----|---------|-----------------|----------|--------|-------------|--------|---|
| 44 | RUNX1   | ENST00000300305 | p.Y189H  | c.565  | 0.016978933 | 16.707 | 1 |
| 45 | BAK1    | ENST00000360661 | p.R76W   | c.226  | 0.253349064 | 2.11   | 1 |
| 45 | BAX     | ENST00000293288 | p.W139C  | c.417  | 0.024153428 | 8.973  | 1 |
| 45 | BCL2L1  | ENST00000420653 | p.R132L  | c.395  | 0.325332871 | 0      | 1 |
| 45 | BCL2L11 | ENST00000393256 | p.R153P  | c.458  | 0.134639324 | 3.447  | 1 |
| 46 | EXOSC2  | ENST00000372358 | p.E232D  | c.696  | 0.010205604 | 11.224 | 1 |
| 46 | EXOSC2  | ENST00000372358 | p.R238W  | c.712  | 0.065302027 | 7.18   | 1 |
| 46 | EXOSC2  | ENST00000372358 | p.D270N  | c.808  | 0.212895352 | 0      | 1 |
| 46 | EXOSC7  | ENST00000265564 | p.E20K   | c.58   | 0.003998631 | 19.199 | 1 |
| 46 | EXOSC7  | ENST00000265564 | p.D25G   | c.74   | 0.196774291 | 2.929  | 1 |
| 46 | EXOSC7  | ENST00000265564 | p.R27C   | c.79   | 0.092217317 | 3.751  | 1 |
| 47 | CACYBP  | ENST00000367679 | p.A62V   | c.185  | 0.075050214 | 3.736  | 1 |
| 47 | SIAH1   | ENST00000356721 | p.L189I  | c.565  | 0.075050214 | 0      | 1 |
| 48 | HCFC1   | ENST00000369984 | p.T1087N | c.3260 | 0.108163006 | 0      | 1 |
| 48 | OGT     | ENST00000373719 | p.S399F  | c.1196 | 0.01052268  | 6.706  | 1 |
| 48 | OGT     | ENST00000373719 | p.Y418C  | c.1253 | 0.080578586 | 3.676  | 1 |
| 48 | OGT     | ENST00000373719 | p.D430N  | c.1288 | 0.009504799 | 6.854  | 1 |
| 48 | OGT     | ENST00000373719 | p.L435M  | c.1303 | 0.012831676 | 6.417  | 1 |
| 49 | CHRNA4  | ENST00000370263 | p.A56S   | c.166  | 0.006146582 | 0      | 1 |
| 49 | CHRN2   | ENST00000368476 | p.R106W  | c.316  | 0.006146582 | 7.346  | 1 |
| 50 | APP     | ENST00000346798 | p.M303I  | c.909  | 0.18279296  | 0      | 1 |
| 50 | PRSS3   | ENST00000361005 | p.G106C  | c.316  | 0.125192561 | 3.089  | 1 |
| 50 | PRSS3   | ENST00000361005 | p.R125H  | c.374  | 0.021456283 | 5.762  | 1 |
| 50 | PRSS3   | ENST00000361005 | p.S257F  | c.770  | 0.053212107 | 4.416  | 1 |
| 51 | CGA     | ENST00000369582 | p.F57L   | c.171  | 0.039379682 | 13.453 | 1 |
| 51 | CGA     | ENST00000369582 | p.K75T   | c.224  | 0.297778764 | 6.304  | 1 |
| 51 | CGA     | ENST00000369582 | p.V77I   | c.229  | 1.175886683 | 0      | 2 |
| 51 | CGA     | ENST00000369582 | p.Y113F  | c.338  | 0.283484354 | 11.632 | 1 |
| 51 | CGB     | ENST00000357383 | p.R115H  | c.344  | 0.377981868 | 9.045  | 1 |
| 51 | CGB5    | ENST00000301408 | p.A103T  | c.307  | 0.032279655 | 6.496  | 1 |
| 51 | CGB7    | ENST00000377280 | p.A34T   | c.100  | 0.012833093 | 19.775 | 1 |
| 51 | CGB7    | ENST00000377280 | p.V49A   | c.146  | 0.071021743 | 15.741 | 1 |
| 51 | CGB7    | ENST00000377280 | p.D119E  | c.357  | 0.401470775 | 2.74   | 1 |
| 51 | FSHB    | ENST00000533718 | p.D54N   | c.160  | 0.062375726 | 17.429 | 1 |
| 51 | FSHB    | ENST00000533718 | p.T68S   | c.202  | 0.224374258 | 18.858 | 1 |
| 51 | FSHR    | ENST00000406846 | p.S128F  | c.383  | 0.008569621 | 13.539 | 1 |
| 51 | LHCGR   | ENST00000294954 | p.E154K  | c.460  | 0.025693753 | 14.77  | 1 |
| 51 | LHCGR   | ENST00000294954 | p.E203K  | c.607  | 0.015857295 | 15.474 | 1 |
| 52 | C3      | ENST00000245907 | p.S1304N | c.3911 | 0.038992324 | 6.136  | 1 |

|          |                 |                        |           |             |        |   |
|----------|-----------------|------------------------|-----------|-------------|--------|---|
| 52 C3    | ENST00000245907 | p.S1305P               | c.3913    | 0.149978562 | 2.758  | 1 |
| 52 C3    | ENST00000245907 | p.E1326K               | c.3976    | 0.119696197 | 14.851 | 1 |
| 52 CFB   | ENST00000425368 | p.R415H                | c.1244    | 0.137900059 | 11.759 | 1 |
| 52 CFB   | ENST00000425368 | p.E644K                | c.1930    | 0.162370598 | 0      | 1 |
| 53 CNOT1 | ENST00000317147 | p.M1454I               | c.4362    | 0.167125062 | 2.581  | 1 |
| 53 RQCD1 | ENST00000509807 | p.P75S                 | c.223     | 0.167125062 | 0      | 1 |
| 54 HFE   | ENST00000357618 | p.F98L                 | c.292     | 0.036573294 | 5.798  | 1 |
| 54 TF    | ENST00000402696 | p.G383R                | c.1147    | 0.07036038  | 4.842  | 1 |
| 54 TFRC  | ENST00000360110 | p.R646C                | c.1936    | 1.052840165 | 0      | 1 |
| 54 TFRC  | ENST00000360110 | p.R646S                | c.1936    | 1.052840165 | 0      | 1 |
| 55 DOCK2 | ENST00000256935 | p.L1527H               | c.4580    | 1.009112638 | 10.5   | 2 |
| 55 DOCK2 | ENST00000256935 | p.L1531P               | c.4592    | 0.018680101 | 9.464  | 1 |
| 55 DOCK2 | ENST00000256935 | p.G1533E               | c.4598    | 1.105618744 | 0      | 2 |
| 55 DOCK2 | ENST00000256935 | p.I1534S               | c.4601    | 0.024220866 | 9.084  | 1 |
| 55 DOCK2 | ENST00000256935 | p.V1539F               | c.4615    | 0.07833203  | 10.258 | 1 |
| 55 RAC1  | ENST00000356142 | p.N39S                 | c.116     | 0.246188708 | 3.422  | 1 |
| 55 RAC1  | ENST00000356142 | p.Y40S                 | c.119     | 0.028545939 | 7.196  | 1 |
| 55 RAC1  | ENST00000356142 | p.Q61R                 | c.182     | 0.141148073 | 15.11  | 1 |
| 55 RAC1  | ENST00000356142 | p.G15S                 | c.43      | 0.004520109 | 18.15  | 1 |
| 55 RAC1  | ENST00000356142 | p.C18F                 | c.53      | 1.00614634  | 17.697 | 1 |
| 55 RAC1  | ENST00000356142 | p.C18Y                 | c.53      | 1.00614634  | 17.697 | 1 |
| 55 VAV1  | ENST00000602142 | p.M330I                | c.990     | 0.172255034 | 18.566 | 1 |
| 56 CFBF  | ENST00000412916 | p.A56G                 | c.167     | 0.068152341 | 7.539  | 1 |
| 56 CFBF  | ENST00000412916 | p.N63S                 | c.188     | 0.36837865  | 0      | 1 |
| 56 RUNX1 | ENST00000300305 | p.A134P                | c.400     | 0.158628658 | 3.06   | 1 |
| 56 RUNX1 | ENST00000300305 | p.G135D                | c.404     | 0.108934658 | 3.683  | 1 |
| 56 RUNX1 | ENST00000300305 | p.N139S                | c.416     | 0.031511431 | 5.74   | 1 |
| 56 RUNX1 | ENST00000300305 | p.S141L                | c.422     | 0.21101141  | 2.819  | 1 |
| 56 RUNX1 | ENST00000300305 | p.ELRNA143in_frame_del | c.441_427 | 0.006566686 | 7.698  | 1 |
| 57 NONO  | ENST00000276079 | p.R153Q                | c.458     | 0.011690631 | 6.588  | 1 |
| 57 NONO  | ENST00000276079 | p.V222G                | c.665     | 0.018894762 | 5.887  | 1 |
| 57 NONO  | ENST00000276079 | p.R293H                | c.878     | 0.110709232 | 3.214  | 1 |
| 57 PSPC1 | ENST00000338910 | p.D283E                | c.849     | 0.135060744 | 0      | 1 |
| 58 DKK1  | ENST00000373970 | p.Q184H                | c.552     | 0.00361447  | 0      | 1 |
| 58 LRP6  | ENST00000261349 | p.Q1187K               | c.3559    | 0.00361447  | 8.112  | 1 |
| 59 B2M   | ENST00000544417 | p.Y30H                 | c.88      | 0.222021027 | 5.175  | 1 |
| 59 CD1A  | ENST00000289429 | p.W260R                | c.778     | 1.014450801 | 12.068 | 2 |
| 59 CD1B  | ENST00000368168 | p.W261L                | c.782     | 0.012465033 | 11.778 | 1 |
| 59 CD1D  | ENST00000368171 | p.D258N                | c.772     | 0.009683733 | 12.145 | 1 |

|    |        |                 |         |           |             |        |   |
|----|--------|-----------------|---------|-----------|-------------|--------|---|
| 59 | CD1D   | ENST00000368171 | p.L263F | c.787     | 1.032292456 | 0      | 1 |
| 59 | CD1D   | ENST00000368171 | p.L263I | c.787     | 1.032292456 | 0      | 1 |
| 59 | CD1D   | ENST00000368171 | p.R264L | c.791     | 0.108910855 | 8.544  | 1 |
| 59 | CD1D   | ENST00000368171 | p.A265T | c.793     | 0.009304552 | 12.203 | 1 |
| 59 | HFE    | ENST00000357618 | p.G260V | c.779     | 0.01250794  | 11.773 | 1 |
| 60 | RNF43  | ENST00000584437 | p.L82S  | c.245     | 0.015533093 | 9.391  | 1 |
| 60 | RNF43  | ENST00000584437 | p.M83T  | c.248     | 0.146262309 | 7.203  | 1 |
| 60 | RNF43  | ENST00000584437 | p.S85F  | c.254     | 0.114249072 | 3.392  | 1 |
| 60 | RNF43  | ENST00000584437 | p.H86R  | c.257     | 0.183603749 | 2.857  | 1 |
| 60 | RNF43  | ENST00000584437 | p.M173T | c.518     | 0.003172084 | 9.824  | 1 |
| 60 | RSPO1  | ENST00000401068 | p.G52S  | c.154     | 0.035989348 | 7.937  | 1 |
| 60 | RSPO1  | ENST00000401068 | p.N67K  | c.201     | 0.025658773 | 12.556 | 1 |
| 60 | RSPO1  | ENST00000401068 | p.D68N  | c.202     | 0.134641636 | 10.28  | 1 |
| 60 | RSPO1  | ENST00000401068 | p.Q71P  | c.212     | 0.247714637 | 0      | 1 |
| 61 | CD80   | ENST00000264246 | p.A125T | c.373     | 1.009329276 | 0      | 2 |
| 61 | CD86   | ENST00000330540 | p.M120I | c.360     | 0.01420268  | 12.928 | 1 |
| 61 | CTLA4  | ENST00000302823 | p.A87T  | c.259     | 0.032347965 | 6.764  | 1 |
| 62 | C8A    | ENST00000361249 | p.R207W | c.619     | 1.004055232 | 0      | 1 |
| 62 | C8A    | ENST00000361249 | p.R207Q | c.620_621 | 1.004055232 | 0      | 1 |
| 62 | C8B    | ENST00000371237 | p.D148E | c.444     | 0.008110463 | 7.946  | 1 |
| 63 | CAPN2  | ENST00000295006 | p.R664L | c.1991    | 0.038792538 | 5.846  | 1 |
| 63 | CAPN2  | ENST00000295006 | p.R668Q | c.2003    | 0.137718946 | 2.941  | 1 |
| 63 | CAPNS1 | ENST00000587718 | p.R145H | c.434     | 0.025062651 | 10.518 | 1 |
| 63 | CAPNS1 | ENST00000588815 | p.S268F | c.803     | 0.148285059 | 0      | 1 |
| 64 | IL1B   | ENST00000263341 | p.R120Q | c.359     | 0.030285237 | 0      | 1 |
| 64 | IL1R1  | ENST00000233946 | p.S290C | c.868     | 0.007602022 | 7.072  | 1 |
| 64 | IL1R1  | ENST00000233946 | p.I293T | c.878     | 0.016303846 | 5.959  | 1 |
| 64 | IL1R1  | ENST00000233946 | p.K315R | c.944     | 0.006936972 | 7.205  | 1 |
| 65 | PPP2CA | ENST00000481195 | p.L170I | c.508     | 0.001218064 | 9.715  | 1 |
| 65 | PPP2CA | ENST00000481195 | p.S173Y | c.518     | 0.021744618 | 5.62   | 1 |
| 65 | PPP2CA | ENST00000481195 | p.T176A | c.526     | 0.002619833 | 8.609  | 1 |
| 65 | PPP2CA | ENST00000481195 | p.G193C | c.577     | 0.002284641 | 12.427 | 1 |
| 65 | PPP2CA | ENST00000481195 | p.R206H | c.617     | 0.00059355  | 10.751 | 1 |
| 65 | PPP2CA | ENST00000481195 | p.F220S | c.659     | 0.000834    | 10.262 | 1 |
| 65 | SGOL1  | ENST00000421451 | p.K62E  | c.184     | 0.025687193 | 0      | 1 |
| 65 | SGOL1  | ENST00000421451 | p.E71K  | c.211     | 0.002570152 | 15.496 | 1 |
| 65 | SGOL1  | ENST00000421451 | p.E77Q  | c.229     | 0.000858525 | 17.653 | 1 |
| 66 | PIK3CA | ENST00000263967 | p.G364R | c.1090    | 1.174441574 | 16.847 | 2 |
| 66 | PIK3CA | ENST00000263967 | p.E365K | c.1093    | 4.664303134 | 8.355  | 2 |

|    |        |                 |                         |             |             |        |     |
|----|--------|-----------------|-------------------------|-------------|-------------|--------|-----|
| 66 | PIK3CA | ENST00000263967 | p.E365V                 | c.1094      | 4.664303134 | 8.355  | 2   |
| 66 | PIK3CA | ENST00000263967 | p.P366R                 | c.1097      | 0.952594619 | 9.799  | 1   |
| 66 | PIK3CA | ENST00000263967 | p.E542K                 | c.1624      | 80.50134273 | 6.196  | 73  |
| 66 | PIK3CA | ENST00000263967 | p.E542Q                 | c.1624      | 80.50134273 | 6.196  | 1   |
| 66 | PIK3CA | ENST00000263967 | p.E542A                 | c.1625      | 80.50134273 | 6.196  | 2   |
| 66 | PIK3CA | ENST00000263967 | p.E542G                 | c.1625      | 80.50134273 | 6.196  | 1   |
| 66 | PIK3CA | ENST00000263967 | p.E542V                 | c.1625      | 80.50134273 | 6.196  | 2   |
| 66 | PIK3CA | ENST00000263967 | p.E545K                 | c.1633      | 145.8737221 | 0      | 130 |
| 66 | PIK3CA | ENST00000263967 | p.E545Q                 | c.1633      | 145.8737221 | 0      | 2   |
| 66 | PIK3CA | ENST00000263967 | p.E545A                 | c.1634      | 145.8737221 | 0      | 6   |
| 66 | PIK3CA | ENST00000263967 | p.E545G                 | c.1634      | 145.8737221 | 0      | 5   |
| 66 | PIK3CA | ENST00000263967 | p.E545D                 | c.1635      | 145.8737221 | 0      | 2   |
| 66 | PIK3CA | ENST00000263967 | p.Q546K                 | c.1636      | 27.98619117 | 6.602  | 10  |
| 66 | PIK3CA | ENST00000263967 | p.Q546P                 | c.1637      | 27.98619117 | 6.602  | 6   |
| 66 | PIK3CA | ENST00000263967 | p.Q546R                 | c.1637      | 27.98619117 | 6.602  | 10  |
| 66 | PIK3CA | ENST00000263967 | p.Q546H                 | c.1638      | 27.98619117 | 6.602  | 1   |
| 66 | PIK3CA | ENST00000263967 | p.E547K                 | c.1639      | 1.381874736 | 9.057  | 1   |
| 66 | PIK3CA | ENST00000263967 | p.E547D                 | c.1641      | 1.381874736 | 9.057  | 1   |
| 66 | PIK3CA | ENST00000263967 | p.D1029H                | c.3085      | 1.572814551 | 12.238 | 1   |
| 66 | PIK3R1 | ENST00000396611 | p.G376R                 | c.1126      | 7.757511556 | 11.204 | 8   |
| 66 | PIK3R1 | ENST00000396611 | p.G376R                 | c.1126      | 7.757511556 | 11.204 | 8   |
| 66 | PIK3R1 | ENST00000396611 | p.K379E                 | c.1135      | 17.31170952 | 3.274  | 1   |
| 66 | PIK3R1 | ENST00000396611 | p.K379N                 | c.1137      | 17.31170952 | 3.274  | 2   |
| 66 | PIK3R1 | ENST00000396611 | p.L380in_frame_del      | c.1137_1139 | 31.95012072 | 2.627  | 1   |
| 66 | PIK3R1 | ENST00000396611 | p.452in_frame_insY      | c.1353_1354 | 1.598063786 | 6.522  | 1   |
| 66 | PIK3R1 | ENST00000396611 | p.461in_frame_insREKS   | c.1370_1371 | 12.40718061 | 8.923  | 1   |
| 66 | PIK3R1 | ENST00000396611 | p.460in_frame_insKS     | c.1374_1375 | 1.565581508 | 11.915 | 1   |
| 66 | PIK3R1 | ENST00000396611 | p.463in_frame_insYDRSRE | c.1376_1377 | 1.308844887 | 15.443 | 1   |
| 66 | PIK3R1 | ENST00000396611 | p.463in_frame_insE      | c.1382_1383 | 1.308844887 | 15.443 | 1   |
| 66 | PIK3R1 | ENST00000396611 | p.469in_frame_insGLYE   | c.1393_1394 | 3.508825341 | 10.733 | 1   |
| 66 | PIK3R1 | ENST00000396611 | p.569in_frame_insD      | c.1704_1705 | 3.508825341 | 10.733 | 1   |
| 66 | PIK3R1 | ENST00000396611 | p.572in_frame_insR      | c.1712_1713 | 1.598063786 | 6.522  | 1   |
| 67 | FGB    | ENST00000302068 | p.S237P                 | c.709       | 0.21127642  | 3.533  | 1   |
| 67 | FGB    | ENST00000302068 | p.E243K                 | c.727       | 0.031313975 | 13.616 | 1   |
| 67 | FGB    | ENST00000302068 | p.E275K                 | c.823       | 0.197215869 | 3.902  | 1   |
| 67 | FGB    | ENST00000302068 | p.G317C                 | c.949       | 0.024194765 | 6.48   | 1   |
| 67 | FGG    | ENST00000407946 | p.D167N                 | c.499       | 1.170994116 | 0      | 1   |
| 67 | FGG    | ENST00000407946 | p.D167E                 | c.501       | 1.170994116 | 0      | 1   |
| 67 | FGG    | ENST00000407946 | p.I171N                 | c.512       | 0.064688566 | 8.042  | 1   |



|    |         |                 |                       |             |             |        |   |
|----|---------|-----------------|-----------------------|-------------|-------------|--------|---|
| 67 | FGG     | ENST00000407946 | p.G263E               | c.788       | 0.066214087 | 8.568  | 1 |
| 68 | 6-Sep   | ENST00000394617 | p.V123M               | c.367       | 0.009166781 | 7.036  | 1 |
| 68 | 6-Sep   | ENST00000394617 | p.V311F               | c.931       | 0.027939486 | 5.22   | 1 |
| 68 | 7-Sep   | ENST00000399034 | p.A35V                | c.104       | 0.002271521 | 15.33  | 1 |
| 68 | 7-Sep   | ENST00000399034 | p.P38Q                | c.113       | 0.034474412 | 0      | 1 |
| 69 | GH1     | ENST00000323322 | p.E82K                | c.244       | 0.013901927 | 9.169  | 1 |
| 69 | PRL     | ENST00000306482 | p.A82S                | c.244       | 0.071715957 | 6.744  | 1 |
| 69 | PRL     | ENST00000306482 | p.R205S               | c.615       | 0.337000093 | 0      | 1 |
| 69 | PRLR    | ENST00000382002 | p.E67K                | c.199       | 0.252991414 | 2.688  | 1 |
| 69 | PRLR    | ENST00000382002 | p.D120E               | c.360       | 0.199142213 | 2.55   | 1 |
| 70 | GNB1    | ENST00000378609 | p.R256H               | c.767       | 0.159400674 | 2.651  | 1 |
| 70 | GNB1    | ENST00000378609 | p.R283C               | c.847       | 0.000909992 | 10.315 | 1 |
| 70 | GNB1    | ENST00000378609 | p.Q32K                | c.94        | 0.000480606 | 11.236 | 1 |
| 70 | GNG2    | ENST00000557376 | p.D75Y                | c.223       | 0.160409293 | 0      | 1 |
| 71 | MTERFD2 | ENST00000391980 | p.R273W               | c.817       | 0.079711451 | 0      | 1 |
| 71 | NSUN4   | ENST00000474844 | p.S53N                | c.158       | 0.001764478 | 9.255  | 1 |
| 71 | NSUN4   | ENST00000474844 | p.P61S                | c.181       | 0.078202542 | 3.679  | 1 |
| 72 | NFKBIA  | ENST00000216797 | p.Q249H               | c.747       | 0.002465336 | 0      | 1 |
| 72 | RELA    | ENST00000406246 | p.E211K               | c.631       | 0.002465336 | 8.664  | 1 |
| 73 | CUL1    | ENST00000602748 | p.E499D               | c.1497      | 0.032101341 | 14.335 | 1 |
| 73 | CUL1    | ENST00000602748 | p.R506S               | c.1516      | 1.135525831 | 4.855  | 1 |
| 73 | CUL1    | ENST00000602748 | p.R506H               | c.1517      | 1.135525831 | 4.855  | 1 |
| 73 | CUL1    | ENST00000602748 | p.D510G               | c.1529      | 0.013223596 | 7.416  | 1 |
| 73 | CUL1    | ENST00000602748 | p.G543W               | c.1626_1627 | 1.190534559 | 3.483  | 1 |
| 73 | CUL1    | ENST00000602748 | p.G543R               | c.1627      | 1.190534559 | 3.483  | 1 |
| 73 | CUL1    | ENST00000602748 | p.R577Q               | c.1730      | 0.020063756 | 6.936  | 1 |
| 73 | CUL1    | ENST00000602748 | p.E758Q               | c.2272      | 1.112772008 | 15.297 | 1 |
| 73 | CUL1    | ENST00000602748 | p.E758D               | c.2274      | 1.112772008 | 15.297 | 1 |
| 73 | GLMN    | ENST00000370360 | p.P376S               | c.1126      | 0.020723168 | 11.43  | 1 |
| 73 | RBX1    | ENST00000216225 | p.M50V                | c.148       | 1.264288905 | 0      | 1 |
| 73 | RBX1    | ENST00000216225 | p.M50I                | c.150       | 1.264288905 | 0      | 1 |
| 73 | RBX1    | ENST00000216225 | p.A61V                | c.182       | 0.164865791 | 9.099  | 1 |
| 73 | RBX1    | ENST00000216225 | p.T90I                | c.269       | 0.182281806 | 18.769 | 1 |
| 74 | BARD1   | ENST00000260947 | p.M104I               | c.312       | 0.032735504 | 4.933  | 1 |
| 74 | BRCA1   | ENST00000471181 | p.1882in_frame_insTPP | c.5645_5644 | 0.032735504 | 0      | 1 |
| 75 | BOC     | ENST00000273395 | p.T810A               | c.2428      | 0.009799571 | 6.813  | 1 |
| 75 | DHH     | ENST00000266991 | p.N180S               | c.539       | 0.110748625 | 0      | 1 |
| 75 | HHIP    | ENST00000296575 | p.M379I               | c.1137      | 0.108121146 | 3.304  | 1 |
| 75 | SHH     | ENST00000297261 | p.E176K               | c.526       | 0.006580084 | 10.692 | 1 |

|    |        |                 |          |           |             |        |   |
|----|--------|-----------------|----------|-----------|-------------|--------|---|
| 76 | MMP2   | ENST00000219070 | p.L645V  | c.1933    | 0.107917445 | 3.212  | 1 |
| 76 | TIMP2  | ENST00000262768 | p.Q212R  | c.635     | 0.107917445 | 0      | 1 |
| 77 | RPS21  | ENST00000450116 | p.D66H   | c.196     | 0.026116204 | 5.259  | 1 |
| 77 | RPS21  | ENST00000450116 | p.I78F   | c.232     | 0.000193076 | 13.984 | 1 |
| 77 | RPSA   | ENST00000443003 | p.Y37H   | c.109     | 0.026176308 | 0      | 1 |
| 78 | NOTCH1 | ENST00000277541 | p.A2036V | c.6107    | 0.006913309 | 10.168 | 1 |
| 78 | NOTCH1 | ENST00000277541 | p.V2038L | c.6112    | 0.182669514 | 0      | 1 |
| 78 | RBPJ   | ENST00000342295 | p.R396G  | c.1186    | 0.155978434 | 2.79   | 1 |
| 78 | RBPJ   | ENST00000342295 | p.E399K  | c.1195    | 0.042627288 | 4.748  | 1 |
| 79 | BIN1   | ENST00000316724 | p.P551L  | c.1652    | 0.006043249 | 7.437  | 1 |
| 79 | BIN1   | ENST00000316724 | p.G582V  | c.1745    | 0.047474666 | 4.405  | 1 |
| 79 | MYC    | ENST00000377970 | p.S82F   | c.245     | 0.05297312  | 0      | 1 |
| 80 | IL6    | ENST00000420258 | p.D116N  | c.346     | 0.025085543 | 0      | 1 |
| 80 | IL6R   | ENST00000368485 | p.P181Q  | c.542     | 0.025085543 | 5.317  | 1 |
| 81 | IL21   | ENST00000264497 | p.R34C   | c.100     | 1.001436456 | 18.539 | 1 |
| 81 | IL21   | ENST00000264497 | p.R34S   | c.100     | 1.001436456 | 18.539 | 1 |
| 81 | IL21   | ENST00000264497 | p.R40S   | c.118     | 3.001930343 | 0      | 1 |
| 81 | IL21   | ENST00000264497 | p.R40H   | c.119     | 3.001930343 | 0      | 3 |
| 81 | IL21   | ENST00000264497 | p.D33Y   | c.97      | 0.022762645 | 14.525 | 1 |
| 81 | IL21R  | ENST00000395755 | p.Q211R  | c.632     | 0.032849911 | 9.053  | 1 |
| 82 | FSHB   | ENST00000533718 | p.P82H   | c.245     | 0.003812186 | 8.136  | 1 |
| 82 | FSHB   | ENST00000533718 | p.S90F   | c.269     | 0.072650647 | 3.788  | 1 |
| 82 | FSHR   | ENST00000406846 | p.R59Q   | c.176     | 0.07594814  | 0      | 1 |
| 83 | CD74   | ENST00000518797 | p.P219H  | c.656     | 0.123536459 | 0      | 1 |
| 83 | CTSL   | ENST00000340342 | p.S137Y  | c.410     | 0.013382608 | 6.376  | 1 |
| 83 | CTSL   | ENST00000340342 | p.L182P  | c.545     | 0.063474699 | 4.067  | 1 |
| 83 | CTSL   | ENST00000340342 | p.M183I  | c.549     | 0.055549066 | 4.27   | 1 |
| 84 | FGF13  | ENST00000370603 | p.R120L  | c.359     | 0.148183896 | 5.786  | 1 |
| 84 | FGF13  | ENST00000370603 | p.F204V  | c.610     | 0.038787358 | 19.942 | 1 |
| 84 | FGF13  | ENST00000370603 | p.P208L  | c.623_622 | 0.065318663 | 16.876 | 1 |
| 84 | FGF13  | ENST00000370603 | p.M213L  | c.637     | 0.003251291 | 19.238 | 1 |
| 84 | SCN2A  | ENST00000283256 | p.D1843N | c.5527    | 0.005833213 | 14.393 | 1 |
| 84 | SCN2A  | ENST00000283256 | p.R1851W | c.5551    | 0.017431107 | 11.808 | 1 |
| 84 | SCN2A  | ENST00000283256 | p.Y1893D | c.5677    | 0.034844267 | 10.929 | 1 |
| 84 | SCN2A  | ENST00000283256 | p.T1897M | c.5690    | 0.078675764 | 12.876 | 1 |
| 84 | SCN5A  | ENST00000413689 | p.M1842I | c.5526    | 0.021248544 | 11.518 | 1 |
| 84 | SCN5A  | ENST00000413689 | p.R1847H | c.5540    | 1.020151981 | 0      | 2 |
| 84 | SCN5A  | ENST00000413689 | p.M1851I | c.5553    | 0.010645348 | 12.527 | 1 |
| 84 | SCN5A  | ENST00000413689 | p.K1872R | c.5615    | 0.018461102 | 11.724 | 1 |

|    |          |                 |                        |             |             |        |    |
|----|----------|-----------------|------------------------|-------------|-------------|--------|----|
| 84 | SCN5A    | ENST00000413689 | p.S1888F               | c.5663      | 0.015045951 | 12.023 | 1  |
| 85 | APCS     | ENST00000255040 | p.D157N                | c.469       | 0.05536047  | 0      | 1  |
| 85 | FCGR2A   | ENST00000271450 | p.G136R                | c.406       | 0.05536047  | 4.175  | 1  |
| 86 | GSTM2    | ENST00000369831 | p.R96C                 | c.286       | 0.02118004  | 7.223  | 1  |
| 86 | GSTM3    | ENST00000256594 | p.R82C                 | c.244       | 1.006745771 | 0      | 1  |
| 86 | GSTM3    | ENST00000256594 | p.R82H                 | c.245       | 1.006745771 | 0      | 1  |
| 86 | GSTM3    | ENST00000256594 | p.R86C                 | c.256       | 0.007309642 | 14.339 | 1  |
| 86 | GSTM3    | ENST00000256594 | p.C91F                 | c.272       | 0.000595922 | 17.965 | 1  |
| 87 | SMAD2    | ENST00000402690 | p.L442V                | c.1324      | 0.025703836 | 13.913 | 1  |
| 87 | SMAD2    | ENST00000402690 | p.L446V                | c.1336      | 0.143580833 | 10.589 | 1  |
| 87 | SMAD2    | ENST00000402690 | p.D450N                | c.1348      | 3.184867508 | 2.561  | 1  |
| 87 | SMAD2    | ENST00000402690 | p.S276L                | c.827       | 1.014138155 | 14.773 | 2  |
| 87 | SMAD3    | ENST00000327367 | p.Q405L                | c.1214      | 0.336982472 | 9.042  | 1  |
| 87 | SMAD4    | ENST00000342988 | p.D355G                | c.1064      | 0.572090204 | 5.899  | 1  |
| 87 | SMAD4    | ENST00000342988 | p.P356L                | c.1067      | 0.278428511 | 8.3    | 1  |
| 87 | SMAD4    | ENST00000342988 | p.S357P                | c.1069      | 0.129484427 | 12.292 | 1  |
| 87 | SMAD4    | ENST00000342988 | p.RFCLG361in_frame_del | c.1080_1094 | 17.19227095 | 0      | 1  |
| 87 | SMAD4    | ENST00000342988 | p.R361C                | c.1081      | 17.19227095 | 0      | 5  |
| 87 | SMAD4    | ENST00000342988 | p.R361S                | c.1081      | 17.19227095 | 0      | 1  |
| 87 | SMAD4    | ENST00000342988 | p.R361H                | c.1082      | 17.19227095 | 0      | 10 |
| 87 | SMAD4    | ENST00000342988 | p.R361P                | c.1082      | 17.19227095 | 0      | 1  |
| 88 | CTNNB1   | ENST00000349496 | p.K354T                | c.1061      | 0.003116348 | 8.59   | 1  |
| 88 | CTNNB1   | ENST00000349496 | p.N387K                | c.1161      | 0.022297251 | 8.844  | 1  |
| 88 | CTNNB1   | ENST00000349496 | p.S425C                | c.1274      | 0.020119165 | 5.882  | 1  |
| 88 | CTNNB1   | ENST00000349496 | p.N426D                | c.1276      | 0.085184972 | 3.727  | 1  |
| 88 | CTNNB1   | ENST00000349496 | p.C429G                | c.1285      | 0.11654388  | 3.235  | 1  |
| 88 | CTNNBIP1 | ENST00000377263 | p.V68A                 | c.203       | 0.203500844 | 0      | 1  |
| 88 | NR5A2    | ENST00000367362 | p.LD482in_frame_delH   | c.1445_1447 | 0.02729141  | 15.044 | 1  |
| 88 | TCF7L2   | ENST00000545257 | p.E29in_frame_del      | c.80_82     | 0.009468252 | 16.254 | 1  |
| 89 | KEAP1    | ENST00000393623 | p.R415C                | c.1243      | 3.089348297 | 2.653  | 1  |
| 89 | KEAP1    | ENST00000393623 | p.R415H                | c.1244      | 3.089348297 | 2.653  | 1  |
| 89 | KEAP1    | ENST00000393623 | p.G477S                | c.1429      | 0.164379252 | 6.038  | 1  |
| 89 | KEAP1    | ENST00000393623 | p.R483C                | c.1447      | 2.550533232 | 2.772  | 1  |
| 89 | KEAP1    | ENST00000393623 | p.R483H                | c.1448      | 2.550533232 | 2.772  | 1  |
| 89 | KEAP1    | ENST00000393623 | p.G509W                | c.1525      | 0.991347685 | 3.495  | 1  |
| 89 | KEAP1    | ENST00000393623 | p.G524C                | c.1570      | 0.182362042 | 5.888  | 1  |
| 89 | KEAP1    | ENST00000393623 | p.G527F                | c.1580_1579 | 0.097458251 | 6.793  | 1  |
| 89 | KEAP1    | ENST00000393623 | p.G603W                | c.1807      | 0.267827058 | 7.1    | 1  |
| 89 | KEAP1    | ENST00000393623 | p.G333S                | c.997       | 0.101555192 | 14.8   | 1  |

|    |        |                 |          |             |             |        |   |
|----|--------|-----------------|----------|-------------|-------------|--------|---|
| 89 | NFE2L2 | ENST00000397062 | p.D77G   | c.230       | 0.117448402 | 8.032  | 1 |
| 89 | NFE2L2 | ENST00000397062 | p.E79K   | c.235       | 9.816307294 | 0      | 3 |
| 89 | NFE2L2 | ENST00000397062 | p.E79Q   | c.235       | 9.816307294 | 0      | 7 |
| 89 | NFE2L2 | ENST00000397062 | p.T80P   | c.238       | 3.359889684 | 6.163  | 2 |
| 89 | NFE2L2 | ENST00000397062 | p.T80K   | c.239       | 3.359889684 | 6.163  | 1 |
| 89 | NFE2L2 | ENST00000397062 | p.T80R   | c.239       | 3.359889684 | 6.163  | 1 |
| 89 | NFE2L2 | ENST00000397062 | p.E82G   | c.245       | 4.084330743 | 9.16   | 1 |
| 89 | NFE2L2 | ENST00000397062 | p.E82D   | c.246       | 4.084330743 | 9.16   | 4 |
| 89 | NFE2L2 | ENST00000397062 | p.E82D   | c.246       | 4.084330743 | 9.16   | 4 |
| 90 | FBLIM1 | ENST00000441801 | p.S12P   | c.34        | 0.034308632 | 4.915  | 1 |
| 90 | FLNA   | ENST00000369850 | p.E2282K | c.6844      | 0.068207226 | 0      | 1 |
| 90 | ITGB7  | ENST00000267082 | p.S780K  | c.2340_2339 | 0.036222874 | 4.834  | 1 |
| 91 | ANGPT2 | ENST00000325203 | p.C450R  | c.1348      | 0.011040888 | 0      | 1 |
| 91 | TEK    | ENST00000380036 | p.S164L  | c.491       | 0.011040888 | 6.501  | 1 |
| 92 | RPS13  | ENST00000525634 | p.R19G   | c.55        | 0.473257127 | 2.093  | 1 |
| 92 | RPS7   | ENST00000304921 | p.E138K  | c.412       | 1.23544088  | 0      | 2 |
| 92 | RPS7   | ENST00000304921 | p.P190Q  | c.569       | 0.00656779  | 9.898  | 1 |
| 93 | CTNNB1 | ENST00000349496 | p.E334K  | c.1000      | 0.002808155 | 12.037 | 1 |
| 93 | CTNNB1 | ENST00000349496 | p.T339N  | c.1016      | 0.005313929 | 11.114 | 1 |
| 93 | CTNNB1 | ENST00000349496 | p.T257I  | c.770       | 0.022818012 | 9.373  | 1 |
| 93 | CTNNB1 | ENST00000349496 | p.K292E  | c.874       | 0.245814919 | 0      | 1 |
| 93 | TCF7L2 | ENST00000545257 | p.V44I   | c.130       | 0.132888072 | 3.384  | 1 |
| 93 | TCF7L2 | ENST00000545257 | p.S47F   | c.140       | 0.167543088 | 2.758  | 1 |
| 94 | HBA2   | ENST00000251595 | p.H123Y  | c.367       | 0.055522441 | 9.634  | 1 |
| 94 | HBA2   | ENST00000251595 | p.L126M  | c.376       | 0.10877675  | 0      | 1 |
| 94 | HBB    | ENST00000335295 | p.P37A   | c.109       | 0.038073771 | 5.743  | 1 |
| 94 | HBB    | ENST00000335295 | p.M56I   | c.168       | 0.038087861 | 15.315 | 1 |
| 94 | HBE1   | ENST00000380237 | p.V35D   | c.104       | 0.104969101 | 3.493  | 1 |
| 94 | HBG2   | ENST00000380259 | p.M56I   | c.168       | 0.01629156  | 18.06  | 1 |
| 95 | IL2    | ENST00000226730 | p.E80G   | c.239       | 0.002822052 | 17.942 | 1 |
| 95 | IL2    | ENST00000226730 | p.E82K   | c.244       | 0.087399594 | 4.311  | 1 |
| 95 | IL2    | ENST00000226730 | p.E126K  | c.376       | 0.162783898 | 2.794  | 1 |
| 95 | IL2    | ENST00000226730 | p.T131K  | c.392       | 0.019897811 | 5.911  | 1 |
| 95 | IL2RA  | ENST00000379959 | p.R56H   | c.167       | 0.213897408 | 0      | 1 |
| 95 | IL2RA  | ENST00000379959 | p.G61W   | c.181       | 0.033199738 | 9.43   | 1 |
| 95 | IL2RA  | ENST00000379959 | p.S84N   | c.251       | 0.010073523 | 9.634  | 1 |
| 96 | PRKAA2 | ENST00000371244 | p.R421L  | c.1262      | 0.1849202   | 5.328  | 1 |
| 96 | PRKAB1 | ENST00000229328 | p.G88R   | c.262       | 1.02825878  | 0      | 2 |
| 96 | PRKAB1 | ENST00000229328 | p.N110S  | c.329       | 0.1375066   | 8.267  | 1 |

|     |        |                 |         |        |             |        |   |
|-----|--------|-----------------|---------|--------|-------------|--------|---|
| 96  | PRKAB1 | ENST00000229328 | p.V193I | c.577  | 0.008034108 | 13.055 | 1 |
| 97  | DDB1   | ENST00000301764 | p.E160V | c.479  | 0.011517728 | 6.44   | 1 |
| 97  | DDB2   | ENST00000256996 | p.C322F | c.965  | 0.011517728 | 0      | 1 |
| 98  | BCL2L2 | ENST00000250405 | p.R95H  | c.284  | 0.404592348 | 1.694  | 1 |
| 98  | BID    | ENST00000317361 | p.D141N | c.421  | 0.61813763  | 0      | 1 |
| 100 | ITGA2B | ENST00000262407 | p.P499H | c.1496 | 0.304318823 | 1.742  | 1 |
| 100 | ITGA2B | ENST00000262407 | p.R551W | c.1651 | 0.058981779 | 5.852  | 1 |
| 100 | ITGA2B | ENST00000262407 | p.R590Q | c.1769 | 0.261118145 | 16.907 | 1 |
| 100 | ITGAV  | ENST00000261023 | p.G337D | c.1010 | 0.137713336 | 17.074 | 1 |
| 100 | ITGB3  | ENST00000559488 | p.S395F | c.1184 | 0.241429465 | 18.994 | 1 |
| 100 | ITGB3  | ENST00000559488 | p.F396L | c.1188 | 0.050552187 | 11.6   | 1 |
| 100 | ITGB3  | ENST00000559488 | p.K410E | c.1228 | 0.045196656 | 11.744 | 1 |
| 100 | ITGB3  | ENST00000559488 | p.S79F  | c.236  | 0.316898944 | 0      | 1 |
| 101 | PAK1   | ENST00000278568 | p.H86Y  | c.256  | 0.00964002  | 6.712  | 1 |
| 101 | PAK1   | ENST00000278568 | p.V87A  | c.260  | 0.010729273 | 6.556  | 1 |
| 101 | RAC3   | ENST00000306897 | p.P34L  | c.101  | 0.020166542 | 0      | 1 |
| 102 | CXCL12 | ENST00000395794 | p.C71Y  | c.212  | 0.048227505 | 0      | 1 |
| 102 | CXCR4  | ENST00000409817 | p.G23E  | c.68   | 0.048227505 | 4.374  | 1 |
| 103 | C8A    | ENST00000361249 | p.D139N | c.415  | 0.015061611 | 0      | 1 |
| 103 | C8A    | ENST00000361249 | p.Y205H | c.613  | 0.00666971  | 14.429 | 1 |
| 103 | C8B    | ENST00000371237 | p.G142E | c.425  | 0.008228469 | 6.935  | 1 |
| 103 | C8B    | ENST00000371237 | p.M166L | c.496  | 0.013524042 | 7.191  | 1 |
| 104 | FGA    | ENST00000302053 | p.E170D | c.510  | 0.163454589 | 2.82   | 1 |
| 104 | FGA    | ENST00000302053 | p.D174N | c.520  | 0.008797287 | 7.195  | 1 |
| 104 | FGA    | ENST00000302053 | p.R190H | c.569  | 0.138972263 | 3.237  | 1 |
| 104 | FGA    | ENST00000302053 | p.V192I | c.574  | 0.050228937 | 4.644  | 1 |
| 104 | FGB    | ENST00000302068 | p.K211R | c.632  | 0.295865327 | 0      | 1 |
| 104 | FGB    | ENST00000302068 | p.R224C | c.670  | 0.029772171 | 9.533  | 1 |
| 104 | FGG    | ENST00000407946 | p.E357V | c.1070 | 0.020237765 | 16.579 | 1 |
| 104 | FGG    | ENST00000407946 | p.E163K | c.487  | 0.007949954 | 16.539 | 1 |
| 105 | C3     | ENST00000245907 | p.G468A | c.1403 | 0.008136974 | 0      | 1 |
| 105 | VSIG4  | ENST00000374737 | p.D121H | c.361  | 0.002133818 | 8.881  | 1 |
| 105 | VSIG4  | ENST00000374737 | p.R20C  | c.58   | 0.006028676 | 7.377  | 1 |
| 106 | IL20   | ENST00000367098 | p.R43Q  | c.128  | 2.003948363 | 0      | 3 |
| 106 | IL20   | ENST00000367098 | p.E173D | c.519  | 0.002839061 | 17.006 | 1 |
| 106 | IL20RA | ENST00000316649 | p.P131S | c.391  | 1.001866122 | 10.652 | 1 |
| 106 | IL20RA | ENST00000316649 | p.P131L | c.392  | 1.001866122 | 10.652 | 1 |
| 106 | IL20RA | ENST00000316649 | p.V222I | c.664  | 0.010913026 | 8.534  | 1 |
| 107 | NCBP1  | ENST00000375147 | p.E378K | c.1132 | 0.019898613 | 6.764  | 1 |

|     |          |                 |          |        |             |        |   |
|-----|----------|-----------------|----------|--------|-------------|--------|---|
| 107 | NCBP1    | ENST00000375147 | p.R329T  | c.986  | 0.334376055 | 2.636  | 1 |
| 107 | NCBP2    | ENST00000321256 | p.R99W   | c.295  | 1.171868123 | 0      | 1 |
| 107 | NCBP2    | ENST00000321256 | p.R99Q   | c.296  | 1.171868123 | 0      | 1 |
| 107 | NCBP2    | ENST00000321256 | p.I110M  | c.330  | 0.014752069 | 9.123  | 1 |
| 108 | SSU72    | ENST00000291386 | p.R185H  | c.554  | 0.008332701 | 6.907  | 1 |
| 108 | SYMPK    | ENST00000245934 | p.S292L  | c.875  | 0.008332701 | 0      | 1 |
| 109 | PPP2R1A  | ENST00000322088 | p.R221W  | c.661  | 0.002478228 | 14.901 | 1 |
| 109 | PPP2R1A  | ENST00000322088 | p.S256F  | c.767  | 3.016291602 | 12.121 | 3 |
| 109 | PPP2R1A  | ENST00000322088 | p.S256Y  | c.767  | 3.016291602 | 12.121 | 1 |
| 109 | PPP2R1A  | ENST00000322088 | p.W257C  | c.771  | 0.110949548 | 9.301  | 1 |
| 109 | PPP2R1A  | ENST00000322088 | p.R258C  | c.772  | 4.018874794 | 0      | 2 |
| 109 | PPP2R1A  | ENST00000322088 | p.R258H  | c.773  | 4.018874794 | 0      | 3 |
| 109 | PPP2R1A  | ENST00000322088 | p.R260C  | c.778  | 0.003610598 | 14.357 | 1 |
| 109 | PPP2R2A  | ENST00000315985 | p.M266I  | c.798  | 0.238728725 | 5.938  | 1 |
| 110 | ITGA2B   | ENST00000262407 | p.D263N  | c.787  | 0.037473122 | 4.738  | 1 |
| 110 | ITGB3    | ENST00000559488 | p.D205A  | c.614  | 0.037473122 | 0      | 1 |
| 111 | CUBN     | ENST00000377833 | p.A1098V | c.3293 | 0.012038783 | 6.38   | 1 |
| 111 | CUBN     | ENST00000377833 | p.D1149Y | c.3445 | 0.002692606 | 8.554  | 1 |
| 111 | GIF      | ENST00000257248 | p.R156G  | c.466  | 0.014667498 | 0      | 1 |
| 112 | APC      | ENST00000457016 | p.L1482P | c.4445 | 0.092869598 | 17.43  | 1 |
| 112 | CTNNB1   | ENST00000349496 | p.R515Q  | c.1544 | 0.06744802  | 14.622 | 1 |
| 112 | CTNNB1   | ENST00000349496 | p.R582Q  | c.1745 | 0.058104241 | 11.443 | 1 |
| 112 | CTNNB1   | ENST00000349496 | p.C619Y  | c.1856 | 1.009292044 | 0      | 2 |
| 112 | CTNNBIP1 | ENST00000377263 | p.M29T   | c.86   | 0.063298432 | 6.814  | 1 |
| 113 | KPNB1    | ENST00000290158 | p.L714M  | c.2140 | 0.009200959 | 0      | 1 |
| 113 | SNUPN    | ENST00000371091 | p.R97W   | c.289  | 0.009200959 | 6.764  | 1 |
| 114 | IL13RA1  | ENST00000371666 | p.T269S  | c.806  | 0.021249643 | 7.56   | 1 |
| 114 | IL13RA1  | ENST00000371666 | p.N273D  | c.817  | 0.10422985  | 3.301  | 1 |
| 114 | IL13RA1  | ENST00000371666 | p.F275L  | c.825  | 0.026678133 | 6.019  | 1 |
| 114 | IL13RA1  | ENST00000371666 | p.V299F  | c.895  | 0.011975535 | 7.301  | 1 |
| 114 | IL2RG    | ENST00000374202 | p.E167D  | c.501  | 0.079157876 | 19.907 | 1 |
| 114 | IL4R     | ENST00000395762 | p.V177M  | c.529  | 0.014533222 | 12.735 | 1 |
| 114 | IL4R     | ENST00000395762 | p.R185C  | c.553  | 0.12875001  | 0      | 1 |
| 114 | IL4R     | ENST00000395762 | p.A187T  | c.559  | 0.028742467 | 13.61  | 1 |
| 115 | IL6      | ENST00000404625 | p.R207W  | c.619  | 0.286161538 | 0      | 1 |
| 115 | IL6R     | ENST00000368485 | p.R250I  | c.749  | 0.016509643 | 6.269  | 1 |
| 115 | IL6R     | ENST00000368485 | p.G299R  | c.895  | 0.276736975 | 1.872  | 1 |
| 116 | GNAI3    | ENST00000369851 | p.H213N  | c.637  | 0.204351337 | 3.316  | 1 |
| 116 | RGS2     | ENST00000235382 | p.S103L  | c.308  | 0.004236311 | 11.463 | 1 |

|     |        |                 |                        |             |             |        |   |
|-----|--------|-----------------|------------------------|-------------|-------------|--------|---|
| 116 | RGS2   | ENST00000235382 | p.F105L                | c.315       | 1.100765986 | 0      | 2 |
| 117 | RPS20  | ENST00000519807 | p.R79C                 | c.235       | 1.000012742 | 0      | 2 |
| 117 | RPS3   | ENST00000278572 | p.G15R                 | c.43        | 0.002127467 | 16.26  | 1 |
| 118 | GNAI1  | ENST00000351004 | p.R208Q                | c.623       | 0.382468813 | 8.721  | 1 |
| 118 | GNAI1  | ENST00000351004 | p.D315N                | c.943       | 0.010270231 | 19.862 | 1 |
| 118 | RGS1   | ENST00000367459 | p.E125K                | c.373       | 1.003264985 | 0      | 1 |
| 118 | RGS1   | ENST00000367459 | p.E125R                | c.373_374   | 1.003264985 | 0      | 1 |
| 118 | RGS1   | ENST00000367459 | p.S126Y                | c.377       | 0.005098832 | 16.8   | 1 |
| 118 | RGS1   | ENST00000367459 | p.E134Q                | c.400       | 0.027715851 | 14.34  | 1 |
| 118 | RGS14  | ENST00000408923 | p.E499K                | c.1495      | 0.196640788 | 11.356 | 1 |
| 118 | RGS16  | ENST00000367558 | p.P127L                | c.380       | 0.070816588 | 13.171 | 1 |
| 118 | RGS16  | ENST00000367558 | p.E129K                | c.385       | 0.181072466 | 11.492 | 1 |
| 119 | NPPA   | ENST00000376480 | p.A140T                | c.418       | 0.391807746 | 3.089  | 1 |
| 119 | NPPB   | ENST00000376468 | p.S123F                | c.368       | 0.197771049 | 4.415  | 1 |
| 119 | NPR3   | ENST00000265074 | p.Y138H                | c.412       | 2.168417299 | 0      | 3 |
| 119 | NPR3   | ENST00000265074 | p.A159V                | c.476       | 0.001420802 | 14.133 | 1 |
| 119 | NPR3   | ENST00000265074 | p.Y171H                | c.511       | 0.085723995 | 8.186  | 1 |
| 119 | NPR3   | ENST00000265074 | p.L209P                | c.626       | 0.010813515 | 10.882 | 1 |
| 120 | CSTA   | ENST00000264474 | p.G75R                 | c.223       | 0.021758819 | 0      | 1 |
| 120 | CTSL   | ENST00000340342 | p.F258L                | c.774       | 0.009802152 | 6.69   | 1 |
| 120 | CTSV   | ENST00000259470 | p.E306Q                | c.916       | 0.012190538 | 6.372  | 1 |
| 121 | FADD   | ENST00000301838 | p.L137Q                | c.410       | 0.012056876 | 0      | 1 |
| 121 | FAS    | ENST00000355740 | p.D228N                | c.682       | 0.012056876 | 6.374  | 1 |
| 122 | CNOT1  | ENST00000317147 | p.R2045W               | c.6133      | 1.055316289 | 0      | 1 |
| 122 | CNOT1  | ENST00000317147 | p.R2045Q               | c.6134      | 1.055316289 | 0      | 1 |
| 122 | CNOT2  | ENST00000551043 | p.A400V                | c.1199      | 0.096600632 | 4.377  | 1 |
| 122 | CNOT2  | ENST00000551043 | p.R409Q                | c.1226      | 0.014723918 | 7.12   | 1 |
| 123 | XRCC5  | ENST00000392132 | p.E428D                | c.1284      | 0.0217476   | 5.523  | 1 |
| 123 | XRCC6  | ENST00000405878 | p.V482M                | c.1444      | 0.0217476   | 0      | 1 |
| 124 | BMI1   | ENST00000376663 | p.R45C                 | c.133       | 0.008572906 | 0      | 1 |
| 124 | RNF2   | ENST00000367510 | p.R26Q                 | c.77        | 0.008572906 | 6.866  | 1 |
| 125 | IL5    | ENST00000231454 | p.M126I                | c.378       | 0.017087683 | 0      | 1 |
| 125 | IL5RA  | ENST00000256452 | p.R208H                | c.623       | 0.014163027 | 6.146  | 1 |
| 125 | IL5RA  | ENST00000256452 | p.P266S                | c.796       | 0.003008437 | 8.397  | 1 |
| 126 | MAX    | ENST00000358664 | p.R47W                 | c.139       | 0.002666199 | 8.551  | 1 |
| 126 | MYC    | ENST00000377970 | p.L419M                | c.1255      | 0.002666199 | 0      | 1 |
| 127 | PIK3CA | ENST00000263967 | p.K948E                | c.2842      | 0.088904581 | 5.089  | 1 |
| 127 | PIK3R1 | ENST00000396611 | p.RDQYL577in_frame_del | c.1728_1742 | 1.030266079 | 0      | 1 |
| 127 | PIK3R1 | ENST00000396611 | p.RD577in_frame_del    | c.1729_1734 | 1.030266079 | 0      | 1 |

|     |          |                 |                    |             |             |        |   |
|-----|----------|-----------------|--------------------|-------------|-------------|--------|---|
| 127 | PIK3R1   | ENST00000396611 | p.M582in_frame_del | c.1742_1744 | 0.031914963 | 10.141 | 1 |
| 128 | IL7      | ENST00000263851 | p.D101H            | c.301       | 0.006172198 | 0      | 1 |
| 128 | IL7R     | ENST00000303115 | p.E79D             | c.237       | 0.006172198 | 7.34   | 1 |
| 129 | FLNA     | ENST00000369850 | p.S1899F           | c.5696      | 0.103593113 | 0      | 1 |
| 129 | GP1BA    | ENST00000329125 | p.R584S            | c.1752      | 0.103593113 | 3.271  | 1 |
| 130 | MAPK8    | ENST00000360332 | p.D112Y            | c.334       | 0.006024493 | 7.479  | 1 |
| 130 | MAPK8    | ENST00000360332 | p.M121I            | c.363       | 0.075209782 | 3.741  | 1 |
| 130 | NFATC3   | ENST00000346183 | p.P152L            | c.455       | 0.080395832 | 0      | 1 |
| 131 | CDC42    | ENST00000421089 | p.K208E            | c.622       | 0.030628107 | 5.029  | 1 |
| 131 | WAS      | ENST00000376701 | p.G239V            | c.716       | 0.030628107 | 0      | 1 |
| 132 | MAPK1    | ENST00000398822 | p.E81K             | c.241       | 0.015105923 | 8.544  | 1 |
| 132 | MAPK1    | ENST00000398822 | p.D162G            | c.485       | 0.247110093 | 0      | 1 |
| 132 | RPS6KA1  | ENST00000531382 | p.S728P            | c.2182      | 0.033594416 | 5.182  | 1 |
| 132 | RPS6KA1  | ENST00000531382 | p.S729C            | c.2186      | 0.235211987 | 2.205  | 1 |
| 133 | FGF1     | ENST00000359370 | p.R137W            | c.409       | 0.080052897 | 0      | 1 |
| 133 | FGFR2    | ENST00000457416 | p.R210Q            | c.629       | 0.050059123 | 4.365  | 1 |
| 133 | FGFR2    | ENST00000457416 | p.Q212K            | c.634       | 0.00941589  | 6.83   | 1 |
| 133 | SYT1     | ENST00000393240 | p.E141D            | c.423       | 0.024037164 | 5.459  | 1 |
| 134 | AURKB    | ENST00000316199 | p.R96W             | c.286       | 0.005179398 | 7.593  | 1 |
| 134 | INCENP   | ENST00000394818 | p.P850L            | c.2549      | 0.005179398 | 0      | 1 |
| 135 | CD3E     | ENST00000361763 | p.D187G            | c.560       | 0.148202403 | 2.797  | 1 |
| 135 | CD3E     | ENST00000361763 | p.E189Q            | c.565       | 0.013201088 | 6.821  | 1 |
| 135 | EPS8L1   | ENST00000201647 | p.G525E            | c.1574      | 0.006565506 | 11.157 | 1 |
| 135 | SYK      | ENST00000375754 | p.R175L            | c.524       | 0.153168643 | 0      | 1 |
| 136 | FGFR1    | ENST00000425967 | p.S461F            | c.1382      | 1.270323805 | 0      | 2 |
| 136 | FGFR1    | ENST00000425967 | p.S492F            | c.1475      | 1.270323805 | 0      | 2 |
| 136 | FRS2     | ENST00000550389 | p.R64H             | c.191       | 0.314636065 | 4.412  | 1 |
| 136 | FRS2     | ENST00000550389 | p.N111H            | c.331       | 0.439047877 | 2.228  | 1 |
| 136 | NTRK2    | ENST00000277120 | p.P514S            | c.1540      | 0.232565123 | 6.659  | 1 |
| 137 | SMAD2    | ENST00000402690 | p.N320H            | c.958       | 0.088572337 | 0      | 1 |
| 137 | SMAD4    | ENST00000342988 | p.K519N            | c.1557      | 0.088572337 | 3.497  | 1 |
| 138 | IL22     | ENST00000328087 | p.R73C             | c.217       | 1.160440938 | 0      | 2 |
| 138 | IL22     | ENST00000328087 | p.E77K             | c.229       | 0.073194009 | 8.116  | 1 |
| 138 | IL22RA1  | ENST00000270800 | p.G61E             | c.182       | 0.185363859 | 3.642  | 1 |
| 138 | IL22RA1  | ENST00000270800 | p.E90K             | c.268       | 0.206587338 | 3.704  | 1 |
| 139 | CBX3     | ENST00000337620 | p.W51C             | c.153       | 0.143487802 | 3.801  | 1 |
| 139 | HIST1H1E | ENST00000304218 | p.R25H             | c.74        | 1.071743901 | 0      | 1 |
| 139 | HIST1H1E | ENST00000304218 | p.R25P             | c.74        | 1.071743901 | 0      | 1 |
| 140 | PAK1     | ENST00000278568 | p.I75F             | c.223       | 0.048127323 | 0      | 1 |



|     |          |                 |                    |           |             |        |   |
|-----|----------|-----------------|--------------------|-----------|-------------|--------|---|
| 140 | RAC3     | ENST00000306897 | p.V44M             | c.130     | 0.048127323 | 4.377  | 1 |
| 141 | MMP1     | ENST00000315274 | p.F174S            | c.521     | 0.012751606 | 6.409  | 1 |
| 141 | MMP1     | ENST00000315274 | p.H183R            | c.548     | 0.06019856  | 4.107  | 1 |
| 141 | MMP10    | ENST00000279441 | p.H227Y            | c.679     | 0.037556791 | 5.305  | 1 |
| 141 | TIMP1    | ENST00000377018 | p.A17T             | c.49      | 0.095360767 | 0      | 1 |
| 141 | TIMP2    | ENST00000262768 | p.S94F             | c.282_281 | 0.010780153 | 11.879 | 1 |
| 142 | BPTF     | ENST00000321892 | p.L2771M           | c.8311    | 1.025008812 | 0      | 1 |
| 142 | BPTF     | ENST00000321892 | p.L2771P           | c.8312    | 1.025008812 | 0      | 1 |
| 142 | CHD1     | ENST00000284049 | p.H329R            | c.986     | 0.092719739 | 9.375  | 1 |
| 142 | HIST1H3D | ENST00000377831 | p.R3G              | c.7       | 0.219895608 | 5.557  | 1 |
| 142 | HIST1H3H | ENST00000369163 | p.K5M              | c.14      | 0.159090717 | 16.041 | 1 |
| 142 | KAT6A    | ENST00000406337 | p.A275V            | c.824     | 0.227017797 | 19.353 | 1 |
| 142 | KMT2A    | ENST00000534358 | p.M1585I           | c.4755    | 0.055058381 | 9.97   | 1 |
| 142 | TRIM24   | ENST00000343526 | p.C844Y            | c.2531    | 0.048211668 | 10.169 | 1 |
| 142 | TRIM33   | ENST00000358465 | p.K904Q            | c.2710    | 0.021484247 | 11.363 | 1 |
| 143 | ARHGEF7  | ENST00000375741 | p.R239C            | c.715     | 1.036701937 | 0      | 1 |
| 143 | ARHGEF7  | ENST00000375741 | p.R239H            | c.716     | 1.036701937 | 0      | 1 |
| 143 | PAK1     | ENST00000278568 | p.D183in_frame_del | c.550_548 | 0.073403873 | 4.768  | 1 |
| 144 | 2-Sep    | ENST00000401990 | p.G251A            | c.752     | 0.000990195 | 0      | 1 |
| 144 | 6-Sep    | ENST00000394617 | p.A218V            | c.653     | 0.000990195 | 9.98   | 1 |
| 145 | HIST3H3  | ENST00000366696 | p.P39L             | c.116     | 0.001915584 | 0      | 1 |
| 145 | KDM4A    | ENST00000372396 | p.I87V             | c.259     | 0.001915584 | 9.028  | 1 |
| 146 | CD2      | ENST00000369478 | p.G301R            | c.901     | 0.005671712 | 0      | 1 |
| 146 | CD2BP2   | ENST00000305596 | p.E288Q            | c.862     | 0.005671712 | 7.462  | 1 |
| 147 | NONO     | ENST00000276079 | p.F213L            | c.637     | 0.028086098 | 5.154  | 1 |
| 147 | PSPC1    | ENST00000338910 | p.A266S            | c.796     | 0.028086098 | 0      | 1 |
| 148 | DOCK2    | ENST00000256935 | p.G57D             | c.170     | 0.006275343 | 7.335  | 1 |
| 148 | DOCK2    | ENST00000256935 | p.P25S             | c.73      | 0.013275481 | 6.244  | 1 |
| 148 | ELMO1    | ENST00000442504 | p.D687Y            | c.2059    | 0.01938739  | 0      | 1 |
| 149 | KCND3    | ENST00000315987 | p.E81D             | c.243     | 0.004880144 | 7.683  | 1 |
| 149 | KCND3    | ENST00000315987 | p.F83L             | c.249     | 0.002887433 | 8.443  | 1 |
| 149 | KCNIP1   | ENST00000434108 | p.Q54R             | c.161     | 0.007739612 | 0      | 1 |
| 150 | RPL13A   | ENST00000391857 | p.R117W            | c.349     | 0.001255173 | 9.639  | 1 |
| 150 | RPL13A   | ENST00000484279 | p.G30S             | c.88      | 0.000765032 | 10.354 | 1 |
| 150 | RPL13A   | ENST00000467825 | p.W33R             | c.97      | 0.000573865 | 10.767 | 1 |
| 150 | RPL18A   | ENST00000222247 | p.R166C            | c.496     | 0.002592154 | 0      | 1 |
| 151 | CPA4     | ENST00000222482 | p.Q296K            | c.886     | 0.002857561 | 0      | 1 |
| 151 | LXN      | ENST00000264265 | p.A119V            | c.356     | 0.002857561 | 8.451  | 1 |
| 152 | RAP1B    | ENST00000341355 | p.S88F             | c.263_264 | 0.005262631 | 7.57   | 1 |

|     |          |                 |          |        |             |        |   |
|-----|----------|-----------------|----------|--------|-------------|--------|---|
| 152 | RAP1GAP  | ENST00000374763 | p.L243M  | c.727  | 0.005262631 | 0      | 1 |
| 153 | EME1     | ENST00000511648 | p.V494I  | c.1480 | 0.01552783  | 6.009  | 1 |
| 153 | MUS81    | ENST00000308110 | p.R483C  | c.1447 | 0.01552783  | 0      | 1 |
| 154 | CD247    | ENST00000362089 | p.D84N   | c.250  | 0.388858392 | 2.394  | 1 |
| 154 | PTPRC    | ENST00000442510 | p.Q897H  | c.2691 | 1.191842804 | 0      | 2 |
| 154 | PTPRC    | ENST00000442510 | p.Q897H  | c.2691 | 1.191842804 | 0      | 2 |
| 154 | PTPRC    | ENST00000442510 | p.E899K  | c.2695 | 0.011527309 | 9.298  | 1 |
| 155 | NAE1     | ENST00000359087 | p.P446S  | c.1336 | 0.030162421 | 5.067  | 1 |
| 155 | NAE1     | ENST00000359087 | p.E484G  | c.1451 | 0.011409733 | 6.496  | 1 |
| 155 | UBA3     | ENST00000361055 | p.R47Q   | c.140  | 0.040911126 | 0      | 1 |
| 156 | MAX      | ENST00000358664 | p.V99I   | c.295  | 0.019805816 | 0      | 1 |
| 156 | MXD1     | ENST00000264444 | p.H128L  | c.383  | 0.010097062 | 6.644  | 1 |
| 156 | MXD1     | ENST00000264444 | p.E134K  | c.400  | 0.009904871 | 6.672  | 1 |
| 157 | CXCL12   | ENST00000395794 | p.P53L   | c.158  | 0.1090017   | 3.263  | 1 |
| 157 | CXCL12   | ENST00000395794 | p.C30R   | c.88   | 0.05122391  | 4.43   | 1 |
| 157 | CXCR4    | ENST00000409817 | p.S13L   | c.38   | 0.150560512 | 0      | 1 |
| 158 | NCBP1    | ENST00000375147 | p.V75A   | c.224  | 0.062759398 | 11.252 | 1 |
| 158 | NCBP1    | ENST00000375147 | p.S33C   | c.98   | 1.00702981  | 0      | 1 |
| 158 | NCBP1    | ENST00000375147 | p.S33F   | c.98   | 1.00702981  | 0      | 1 |
| 158 | NCBP2    | ENST00000321256 | p.L6Q    | c.17   | 0.075178917 | 7.239  | 1 |
| 159 | ITGAV    | ENST00000261023 | p.M430I  | c.1290 | 0.012370264 | 6.355  | 1 |
| 159 | ITGAV    | ENST00000261023 | p.Y48N   | c.142  | 0.012722431 | 6.314  | 1 |
| 159 | ITGB3    | ENST00000559488 | p.I291T  | c.872  | 0.024785594 | 0      | 1 |
| 160 | FST      | ENST00000256759 | p.G232E  | c.695  | 0.010051676 | 6.647  | 1 |
| 160 | FSTL3    | ENST00000166139 | p.V237M  | c.709  | 0.007433844 | 7.086  | 1 |
| 160 | INHBA    | ENST00000442711 | p.D405N  | c.1213 | 0.017338633 | 0      | 1 |
| 161 | ERCC1    | ENST00000013807 | p.F140I  | c.418  | 0.106505512 | 3.231  | 1 |
| 161 | XPA      | ENST00000375128 | p.G73E   | c.218  | 0.106505512 | 0      | 1 |
| 162 | SMAD2    | ENST00000402690 | p.R321Q  | c.962  | 1.249610825 | 0      | 2 |
| 162 | SMAD2    | ENST00000402690 | p.M327I  | c.981  | 0.030732221 | 8.099  | 1 |
| 162 | SMAD2    | ENST00000402690 | p.R330M  | c.989  | 0.032123872 | 8.034  | 1 |
| 162 | SMAD4    | ENST00000342988 | p.D493N  | c.1477 | 0.38193845  | 2.632  | 1 |
| 162 | SMAD4    | ENST00000342988 | p.R496H  | c.1487 | 0.1752985   | 3.629  | 1 |
| 163 | MAP2K5   | ENST00000178640 | p.P111S  | c.331  | 0.005493723 | 7.508  | 1 |
| 163 | MAPK7    | ENST00000308406 | p.R168Q  | c.503  | 0.005493723 | 0      | 1 |
| 164 | BPTF     | ENST00000321892 | p.S3011F | c.9032 | 0.017115994 | 10.899 | 1 |
| 164 | BRD4     | ENST00000263377 | p.D96N   | c.286  | 0.199988859 | 0      | 1 |
| 164 | HIST1H4H | ENST00000289352 | p.A16V   | c.47   | 0.053556916 | 4.978  | 1 |
| 164 | HIST1H4H | ENST00000289352 | p.S2C    | c.5    | 0.02987561  | 5.297  | 1 |

|     |          |                 |          |        |             |        |   |
|-----|----------|-----------------|----------|--------|-------------|--------|---|
| 164 | HIST1H4J | ENST00000355057 | p.R4G    | c.10   | 0.150508441 | 2.813  | 1 |
| 165 | RPL21    | ENST00000326092 | p.R130C  | c.388  | 6.03E-05    | 14.017 | 1 |
| 165 | RPL7     | ENST00000352983 | p.R200C  | c.598  | 6.03E-05    | 0      | 1 |
| 166 | CP       | ENST00000264613 | p.G563R  | c.1687 | 0.072955054 | 3.85   | 1 |
| 166 | CP       | ENST00000264613 | p.D573Y  | c.1717 | 0.055619383 | 4.265  | 1 |
| 166 | MPO      | ENST00000340482 | p.Q391L  | c.1172 | 0.121360513 | 0      | 1 |
| 167 | MAP2K5   | ENST00000178640 | p.R69Q   | c.206  | 1.036840534 | 0      | 2 |
| 167 | MAP3K2   | ENST00000409947 | p.G52V   | c.155  | 0.04208559  | 5.582  | 1 |
| 167 | MAP3K3   | ENST00000579585 | p.R87G   | c.259  | 0.032262027 | 5.969  | 1 |
| 168 | SUPT4H1  | ENST00000580947 | p.D68G   | c.203  | 0.223772989 | 5.065  | 1 |
| 168 | SUPT5H   | ENST00000432763 | p.E228D  | c.684  | 1.0347733   | 0      | 2 |
| 168 | SUPT5H   | ENST00000432763 | p.Y230N  | c.688  | 0.173826424 | 7.673  | 1 |
| 169 | COL4A1   | ENST00000375820 | p.A1611V | c.4832 | 0.076468003 | 3.709  | 1 |
| 169 | COL4A2   | ENST00000360467 | p.P1551T | c.4651 | 0.076468003 | 0      | 1 |
| 170 | FLT3     | ENST00000380982 | p.R311Q  | c.932  | 0.002731672 | 8.516  | 1 |
| 170 | FLT3LG   | ENST00000600429 | p.F32L   | c.96   | 0.002731672 | 0      | 1 |
| 171 | XRCC5    | ENST00000392132 | p.P483S  | c.1447 | 0.103163176 | 0      | 1 |
| 171 | XRCC6    | ENST00000405878 | p.P438S  | c.1312 | 0.103163176 | 3.277  | 1 |
| 172 | BRK1     | ENST00000256463 | p.R59Q   | c.176  | 0.008324116 | 17.075 | 1 |
| 172 | BRK1     | ENST00000256463 | p.K70Q   | c.208  | 1.002138312 | 0      | 2 |
| 172 | WASF1    | ENST00000392588 | p.L83F   | c.247  | 0.002519981 | 9.633  | 1 |
| 172 | WASF1    | ENST00000392588 | p.R102Q  | c.305  | 0.010053984 | 10.164 | 1 |
| 173 | KLRK1    | ENST00000540818 | p.H153Y  | c.457  | 0.006506061 | 7.264  | 1 |
| 173 | ULBP3    | ENST00000367339 | p.Q100H  | c.300  | 0.006506061 | 0      | 1 |
| 174 | CHMP5    | ENST00000223500 | p.D184G  | c.551  | 0.003273387 | 8.255  | 1 |
| 174 | VTA1     | ENST00000367630 | p.D31Y   | c.91   | 0.003273387 | 0      | 1 |
| 175 | KDM1A    | ENST00000542151 | p.K478R  | c.1433 | 0.021158547 | 0      | 1 |
| 175 | RCOR1    | ENST00000262241 | p.I355V  | c.1063 | 0.007560155 | 7.067  | 1 |
| 175 | RCOR3    | ENST00000419091 | p.A371V  | c.1112 | 0.005823417 | 7.446  | 1 |
| 175 | RCOR3    | ENST00000419091 | p.N376S  | c.1127 | 0.008070697 | 6.972  | 1 |
| 176 | E2F1     | ENST00000343380 | p.C227F  | c.680  | 0.007593601 | 0      | 1 |
| 176 | TFDP1    | ENST00000375370 | p.Q229R  | c.686  | 0.007593601 | 7.041  | 1 |
| 177 | ESRRG    | ENST00000366937 | p.M310R  | c.929  | 0.027632144 | 0      | 1 |
| 177 | NCOA1    | ENST00000348332 | p.K688N  | c.2064 | 0.01781633  | 5.825  | 1 |
| 177 | NCOR2    | ENST00000356219 | p.A2340V | c.7019 | 0.010168336 | 6.645  | 1 |
| 178 | CDK6     | ENST00000265734 | p.E18K   | c.52   | 0.092040312 | 0      | 1 |
| 178 | CDKN2A   | ENST00000579122 | p.N42H   | c.124  | 0.028119942 | 5.244  | 1 |
| 178 | CDKN2A   | ENST00000579122 | p.Y44C   | c.131  | 0.067385199 | 3.929  | 1 |
| 179 | KCNK9    | ENST00000520439 | p.R370H  | c.1109 | 0.085193724 | 5.438  | 1 |

|     |         |                 |          |         |             |        |   |
|-----|---------|-----------------|----------|---------|-------------|--------|---|
| 179 | KCNK9   | ENST00000520439 | p.V374I  | c.1120  | 0.179549896 | 2.709  | 1 |
| 179 | MAPT    | ENST00000344290 | p.P548S  | c.1642  | 0.015156132 | 17.752 | 1 |
| 179 | RAF1    | ENST00000442415 | p.E642D  | c.1926  | 0.176219612 | 2.74   | 1 |
| 179 | SFN     | ENST00000339276 | p.K49N   | c.147   | 0.326960323 | 0      | 1 |
| 179 | SFN     | ENST00000339276 | p.E133K  | c.397   | 0.04362411  | 10.018 | 1 |
| 179 | SFN     | ENST00000339276 | p.D225N  | c.673   | 0.029030156 | 11.688 | 1 |
| 180 | CDH1    | ENST00000261769 | p.R222G  | c.664   | 0.008980585 | 10.212 | 1 |
| 180 | CDH1    | ENST00000261769 | p.R224H  | c.671   | 1.116426015 | 0      | 2 |
| 180 | KLRG1   | ENST00000266551 | p.S152L  | c.455   | 0.238460194 | 3.113  | 1 |
| 181 | IGF1    | ENST00000307046 | p.R98Q   | c.293   | 2.132494098 | 0      | 3 |
| 181 | IGFBP4  | ENST00000269593 | p.R206H  | c.617   | 0.397482294 | 2.916  | 1 |
| 182 | KMT2C   | ENST00000355193 | p.K4771T | c.14312 | 0.008206598 | 6.929  | 1 |
| 182 | WDR5    | ENST00000358625 | p.D192N  | c.574   | 0.008206598 | 0      | 1 |
| 183 | ESR1    | ENST00000440973 | p.H267Y  | c.799   | 0.069204037 | 3.853  | 1 |
| 183 | SMYD2   | ENST00000366957 | p.E187K  | c.559   | 0.069204037 | 0      | 1 |
| 184 | TNNC1   | ENST00000232975 | p.G110V  | c.329   | 0.000633543 | 10.629 | 1 |
| 184 | TNNI3   | ENST00000344887 | p.K117R  | c.350   | 0.003286826 | 8.25   | 1 |
| 184 | TNNT2   | ENST00000458432 | p.E255D  | c.765   | 0.003916221 | 0      | 1 |
| 185 | PIK3CA  | ENST00000263967 | p.D1045V | c.3134  | 0.010199455 | 6.632  | 1 |
| 185 | PIK3CA  | ENST00000263967 | p.H1048R | c.3143  | 0.011714776 | 6.43   | 1 |
| 185 | PIK3R1  | ENST00000396611 | p.R590W  | c.1768  | 0.02168036  | 0      | 1 |
| 186 | UPF2    | ENST00000357604 | p.H844Y  | c.2530  | 0.000879518 | 0      | 1 |
| 186 | UPF3B   | ENST00000276201 | p.Q137E  | c.409   | 0.000879518 | 10.151 | 1 |
| 188 | KDM1A   | ENST00000542151 | p.E501K  | c.1501  | 0.001266445 | 0      | 1 |
| 188 | RCOR3   | ENST00000419091 | p.R392W  | c.1174  | 0.001266445 | 9.625  | 1 |
| 189 | ANK1    | ENST00000396942 | p.F917L  | c.2751  | 0.071446146 | 0      | 1 |
| 189 | SPTB    | ENST00000556626 | p.T1788M | c.5363  | 0.071446146 | 3.807  | 1 |
| 190 | IFNAR1  | ENST00000270139 | p.T208M  | c.623   | 0.112739987 | 0      | 1 |
| 190 | IFNW1   | ENST00000380229 | p.C122S  | c.364   | 0.002921046 | 8.57   | 1 |
| 190 | IFNW1   | ENST00000380229 | p.R144K  | c.431   | 0.110398402 | 3.183  | 1 |
| 191 | KCTD7   | ENST00000380828 | p.A162V  | c.485   | 0.082315358 | 3.709  | 1 |
| 191 | RAB21   | ENST00000261263 | p.L52P   | c.155   | 0.152936005 | 0      | 1 |
| 191 | RABGEF1 | ENST00000437078 | p.A136V  | c.407   | 0.082315358 | 3.709  | 1 |
| 192 | APC     | ENST00000457016 | p.S546G  | c.1636  | 0.02663758  | 10.142 | 1 |
| 192 | APC     | ENST00000457016 | p.N550H  | c.1648  | 0.119466277 | 0      | 1 |
| 192 | KHDRBS1 | ENST00000327300 | p.E384K  | c.1150  | 0.10086718  | 3.504  | 1 |
| 192 | KHDRBS1 | ENST00000327300 | p.Y386C  | c.1157  | 0.048832401 | 5.038  | 1 |
| 193 | SF1     | ENST00000377387 | p.R146C  | c.436   | 0.013129902 | 0      | 1 |
| 193 | U2AF2   | ENST00000308924 | p.Y395F  | c.1184  | 0.013129902 | 6.251  | 1 |

|     |         |                 |          |           |             |        |   |
|-----|---------|-----------------|----------|-----------|-------------|--------|---|
| 194 | CALM2   | ENST00000409563 | p.S86Y   | c.257     | 0.270766851 | 0      | 1 |
| 194 | IQCG    | ENST00000455191 | p.R410W  | c.1228    | 0.186297487 | 2.564  | 1 |
| 194 | MYO1C   | ENST00000359786 | p.G747C  | c.2239    | 0.014785277 | 6.412  | 1 |
| 194 | MYO1C   | ENST00000359786 | p.L755I  | c.2263    | 0.07788373  | 3.953  | 1 |
| 194 | NOS3    | ENST00000297494 | p.V503M  | c.1507    | 0.03156854  | 5.302  | 1 |
| 195 | ARHGAP1 | ENST00000311956 | p.R291Q  | c.872     | 0.039037379 | 0      | 1 |
| 195 | CDC42   | ENST00000421089 | p.E137Q  | c.409     | 0.039037379 | 4.679  | 1 |
| 196 | PSMD4   | ENST00000368881 | p.E286Q  | c.856     | 0.296621712 | 0      | 1 |
| 196 | RAD23A  | ENST00000586534 | p.M75T   | c.224     | 0.025046758 | 5.672  | 1 |
| 196 | RAD23A  | ENST00000586534 | p.T77I   | c.230     | 0.28244122  | 1.852  | 1 |
| 197 | ANKRA2  | ENST00000296785 | p.E181K  | c.541     | 0.277534615 | 3.473  | 1 |
| 197 | HDAC4   | ENST00000345617 | p.S348L  | c.1043    | 2.171786311 | 0      | 3 |
| 197 | RFXANK  | ENST00000303088 | p.A133G  | c.398     | 0.05072937  | 5.959  | 1 |
| 197 | YWHAG   | ENST00000307630 | p.R57C   | c.169     | 0.203926313 | 3.929  | 1 |
| 198 | DAXX    | ENST00000374542 | p.D738H  | c.2212    | 0.010373165 | 0      | 1 |
| 198 | SUMO1   | ENST00000409368 | p.K16N   | c.48      | 0.010373165 | 6.591  | 1 |
| 199 | EXOSC1  | ENST00000370902 | p.H157Y  | c.469     | 0.001247279 | 10.647 | 1 |
| 199 | EXOSC8  | ENST00000389704 | p.V8M    | c.22      | 1.00062364  | 0      | 2 |
| 200 | SKP1    | ENST00000353411 | p.P46S   | c.136     | 0.164258224 | 0      | 1 |
| 200 | SKP1    | ENST00000353411 | p.L47V   | c.139     | 0.066370426 | 8.577  | 1 |
| 200 | SKP2    | ENST00000274255 | p.H199N  | c.595     | 0.109289138 | 4.096  | 1 |
| 200 | SKP2    | ENST00000274255 | p.T225I  | c.674     | 0.128167589 | 3.277  | 1 |
| 201 | IFNG    | ENST00000229135 | p.K57N   | c.171     | 0.033100573 | 4.917  | 1 |
| 201 | IFNGR1  | ENST00000367739 | p.E164K  | c.490     | 0.033100573 | 0      | 1 |
| 202 | CD3D    | ENST00000300692 | p.K23N   | c.69      | 0.084310156 | 3.59   | 1 |
| 202 | CD3D    | ENST00000300692 | p.E28K   | c.82      | 0.010653219 | 8.443  | 1 |
| 202 | CD3E    | ENST00000361763 | p.Y95H   | c.283     | 0.086001738 | 0      | 1 |
| 202 | CD3E    | ENST00000361763 | p.L114P  | c.341     | 0.008655245 | 13.515 | 1 |
| 203 | LRRRC4C | ENST00000528697 | p.K65N   | c.195     | 0.004680895 | 7.739  | 1 |
| 203 | NTNG1   | ENST00000370073 | p.G461R  | c.1381    | 0.004680895 | 0      | 1 |
| 204 | CALM2   | ENST00000409563 | p.G73E   | c.218     | 0.103736823 | 0      | 1 |
| 204 | DAPK1   | ENST00000469640 | p.R54Q   | c.161_162 | 0.103736823 | 3.269  | 1 |
| 205 | EPHA2   | ENST00000358432 | p.R957C  | c.2869    | 0.009472756 | 6.722  | 1 |
| 205 | INPPL1  | ENST00000298229 | p.D1223G | c.3668    | 0.009472756 | 0      | 1 |
| 206 | AXL     | ENST00000301178 | p.N43T   | c.128     | 0.002200428 | 8.828  | 1 |
| 206 | GAS6    | ENST00000357389 | p.K333N  | c.999     | 0.002200428 | 0      | 1 |
| 207 | CBLB    | ENST00000264122 | p.N69S   | c.206     | 0.14077939  | 2.845  | 1 |
| 207 | CBLB    | ENST00000264122 | p.D267N  | c.799     | 0.023984991 | 6.457  | 1 |
| 207 | UBE2D2  | ENST00000398733 | p.H55R   | c.164     | 0.150685923 | 0      | 1 |

|     |         |                 |                     |           |             |        |    |
|-----|---------|-----------------|---------------------|-----------|-------------|--------|----|
| 207 | UBE2D2  | ENST00000398733 | p.D29N              | c.85      | 0.011160823 | 12.961 | 1  |
| 208 | MAP2K6  | ENST00000590474 | p.K14T              | c.41      | 0.016142412 | 6.953  | 1  |
| 208 | MAPK14  | ENST00000229795 | p.V158M             | c.472     | 1.008071206 | 0      | 2  |
| 209 | C8A     | ENST00000361249 | p.E144K             | c.430     | 0.017950166 | 5.837  | 1  |
| 209 | C8A     | ENST00000361249 | p.E203D             | c.609     | 0.02653463  | 5.261  | 1  |
| 209 | C8G     | ENST00000224181 | p.R120Q             | c.359     | 0.043572366 | 0      | 1  |
| 210 | KRIT1   | ENST00000394505 | p.R432C             | c.1294    | 0.040280705 | 4.671  | 1  |
| 210 | RAP1B   | ENST00000341355 | p.T35M              | c.104     | 0.06539813  | 0      | 1  |
| 210 | RAP1GAP | ENST00000374763 | p.G289R             | c.865     | 0.014287333 | 6.202  | 1  |
| 210 | RAP1GAP | ENST00000374763 | p.S311F             | c.932     | 0.013223826 | 6.315  | 1  |
| 211 | ITGAX   | ENST00000562522 | p.I336F             | c.1006    | 0.158277389 | 0      | 1  |
| 211 | ITGB2   | ENST00000397850 | p.Y137C             | c.410     | 0.083258238 | 3.699  | 1  |
| 211 | ITGB2   | ENST00000397850 | p.P192H             | c.575     | 0.087535868 | 3.621  | 1  |
| 212 | EFNA5   | ENST00000333274 | p.P123S             | c.367     | 0.13432385  | 18.61  | 1  |
| 212 | EFNA5   | ENST00000333274 | p.S125F             | c.374     | 0.080520006 | 8.022  | 1  |
| 212 | EPHA2   | ENST00000358432 | p.KL162in_frame_del | c.491_486 | 0.068640275 | 12.227 | 1  |
| 212 | EPHA3   | ENST00000336596 | p.R104Q             | c.311     | 0.051531315 | 15.074 | 1  |
| 212 | EPHA3   | ENST00000336596 | p.D159G             | c.476     | 0.011092643 | 14.614 | 1  |
| 212 | EPHA3   | ENST00000336596 | p.N165S             | c.494     | 1.004127101 | 0      | 1  |
| 212 | EPHA3   | ENST00000336596 | p.N165K             | c.495     | 1.004127101 | 0      | 1  |
| 213 | CP      | ENST00000264613 | p.L666M             | c.1996    | 0.056934754 | 4.15   | 1  |
| 213 | CP      | ENST00000264613 | p.R864K             | c.2591    | 0.03357803  | 6.569  | 1  |
| 213 | MPO     | ENST00000340482 | p.P380L             | c.1139    | 0.02270199  | 12.046 | 1  |
| 213 | MPO     | ENST00000340482 | p.N384K             | c.1152    | 0.067097193 | 0      | 1  |
| 214 | CNTN1   | ENST00000347616 | p.E313K             | c.937     | 0.004267163 | 19.259 | 1  |
| 214 | CNTN1   | ENST00000347616 | p.N314S             | c.941     | 0.009837993 | 18.047 | 1  |
| 214 | CNTN1   | ENST00000347616 | p.D319Y             | c.955     | 0.089265376 | 7.512  | 1  |
| 214 | PTPRZ1  | ENST00000393386 | p.S204G             | c.610     | 1.005907526 | 0      | 2  |
| 214 | PTPRZ1  | ENST00000393386 | p.R205C             | c.613     | 0.088032342 | 11.27  | 1  |
| 214 | PTPRZ1  | ENST00000393386 | p.G207W             | c.619     | 0.003723324 | 15.7   | 1  |
| 215 | ESR1    | ENST00000440973 | p.D538G             | c.1613    | 0.021270533 | 0      | 1  |
| 215 | FN1     | ENST00000354785 | p.T1613N            | c.4838    | 0.021270533 | 5.555  | 1  |
| 216 | GRB14   | ENST00000263915 | p.H147Y             | c.439     | 0.252921821 | 9.521  | 1  |
| 216 | HRAS    | ENST00000311189 | p.Q61K              | c.181     | 16.54036043 | 0      | 5  |
| 216 | HRAS    | ENST00000311189 | p.Q61L              | c.182     | 16.54036043 | 0      | 2  |
| 216 | HRAS    | ENST00000311189 | p.Q61R              | c.182     | 16.54036043 | 0      | 10 |
| 216 | HRAS    | ENST00000311189 | p.A11D              | c.32      | 0.151035766 | 7.999  | 1  |
| 216 | HRAS    | ENST00000311189 | p.G12C              | c.34      | 7.469712787 | 6.194  | 1  |
| 216 | HRAS    | ENST00000311189 | p.G12S              | c.34      | 7.469712787 | 6.194  | 2  |

|     |        |                 |          |        |             |        |   |
|-----|--------|-----------------|----------|--------|-------------|--------|---|
| 216 | HRAS   | ENST00000311189 | p.G12A   | c.35   | 7.469712787 | 6.194  | 1 |
| 216 | HRAS   | ENST00000311189 | p.G12D   | c.35   | 7.469712787 | 6.194  | 4 |
| 216 | HRAS   | ENST00000311189 | p.G13C   | c.37   | 8.394330397 | 6.458  | 1 |
| 216 | HRAS   | ENST00000311189 | p.G13R   | c.37   | 8.394330397 | 6.458  | 3 |
| 216 | HRAS   | ENST00000311189 | p.G13S   | c.37   | 8.394330397 | 6.458  | 1 |
| 216 | HRAS   | ENST00000311189 | p.G13D   | c.38   | 8.394330397 | 6.458  | 1 |
| 216 | HRAS   | ENST00000311189 | p.G13V   | c.38   | 8.394330397 | 6.458  | 3 |
| 216 | HRAS   | ENST00000311189 | p.D33N   | c.97   | 0.592853736 | 7.038  | 1 |
| 216 | RASA1  | ENST00000274376 | p.R789L  | c.2366 | 5.108581382 | 2.667  | 1 |
| 216 | RASA1  | ENST00000274376 | p.R789Q  | c.2366 | 5.108581382 | 2.667  | 1 |
| 216 | RASA1  | ENST00000274376 | p.N942H  | c.2824 | 0.138819086 | 10.472 | 1 |
| 216 | SOS1   | ENST00000426016 | p.E966Q  | c.2896 | 0.04577959  | 12.132 | 1 |
| 217 | CITED2 | ENST00000537332 | p.E245K  | c.733  | 0.204979074 | 0      | 1 |
| 217 | EP300  | ENST00000263253 | p.A327V  | c.980  | 0.166398799 | 2.652  | 1 |
| 217 | EP300  | ENST00000263253 | p.H328Y  | c.982  | 0.05317914  | 4.446  | 1 |
| 218 | NCOR2  | ENST00000356219 | p.I2349V | c.7045 | 0.007203931 | 0      | 1 |
| 218 | RXRA   | ENST00000481739 | p.T278I  | c.833  | 0.007203931 | 7.117  | 1 |
| 219 | CDKN1A | ENST00000448526 | p.R190P  | c.569  | 0.014680161 | 7.545  | 1 |
| 219 | FEN1   | ENST00000305885 | p.R355L  | c.1064 | 0.146886134 | 2.775  | 1 |
| 219 | PCNA   | ENST00000379143 | p.L37M   | c.109  | 0.008595675 | 14.416 | 1 |
| 219 | PCNA   | ENST00000379143 | p.D120N  | c.358  | 0.151497522 | 0      | 1 |
| 220 | CUL3   | ENST00000264414 | p.S50N   | c.149  | 0.006300078 | 7.317  | 1 |
| 220 | CUL3   | ENST00000264414 | p.S53R   | c.159  | 0.004603732 | 7.772  | 1 |
| 220 | SPOP   | ENST00000393331 | p.K238E  | c.712  | 0.010846426 | 0      | 1 |
| 221 | RNF2   | ENST00000367510 | p.I53F   | c.157  | 0.073575524 | 10.921 | 1 |
| 221 | RNF2   | ENST00000367510 | p.G83D   | c.248  | 1.007625443 | 0      | 1 |
| 221 | UBE2D3 | ENST00000357194 | p.F64L   | c.192  | 0.086763351 | 7.136  | 1 |
| 222 | IL17F  | ENST00000336123 | p.V68I   | c.202  | 0.008189551 | 6.932  | 1 |
| 222 | IL17RA | ENST00000319363 | p.E123K  | c.367  | 0.008189551 | 0      | 1 |
| 224 | C3     | ENST00000245907 | p.R1254H | c.3761 | 0.008466609 | 6.884  | 1 |
| 224 | ITGAM  | ENST00000544665 | p.S158Y  | c.473  | 0.008466609 | 0      | 1 |
| 225 | GH1    | ENST00000323322 | p.E65K   | c.193  | 0.00994371  | 0      | 1 |
| 225 | GHR    | ENST00000230882 | p.E138G  | c.413  | 0.00994371  | 6.652  | 1 |
| 226 | CD40   | ENST00000372285 | p.D265H  | c.793  | 0.032829941 | 5.097  | 1 |
| 226 | TANK   | ENST00000259075 | p.C183Y  | c.548  | 0.12723333  | 3.016  | 1 |
| 226 | TRAF3  | ENST00000560371 | p.D463N  | c.1387 | 0.152839339 | 0      | 1 |
| 227 | SDC4   | ENST00000372733 | p.F196L  | c.588  | 0.089871033 | 3.476  | 1 |
| 227 | SDCBP  | ENST00000523483 | p.A275V  | c.824  | 0.089871033 | 0      | 1 |
| 228 | TSN    | ENST00000389682 | p.T160N  | c.479  | 0.001263814 | 9.628  | 1 |

|     |         |                 |         |           |             |        |   |
|-----|---------|-----------------|---------|-----------|-------------|--------|---|
| 228 | TSNAX   | ENST00000366639 | p.L250V | c.748     | 0.001263814 | 0      | 1 |
| 229 | EFNA5   | ENST00000333274 | p.W100F | c.300_299 | 0.009318734 | 7.682  | 1 |
| 229 | EFNB2   | ENST00000245323 | p.W122L | c.365     | 0.068655162 | 3.873  | 1 |
| 229 | EFNB3   | ENST00000226091 | p.R106H | c.317     | 0.001103125 | 9.926  | 1 |
| 229 | EPHA4   | ENST00000409938 | p.E56A  | c.167     | 0.00413323  | 15.608 | 1 |
| 229 | EPHA4   | ENST00000409938 | p.D61N  | c.181     | 0.074168803 | 0      | 1 |
| 230 | TERF2   | ENST00000254942 | p.S294T | c.881     | 0.02109971  | 0      | 1 |
| 230 | TERF2IP | ENST00000300086 | p.Q308E | c.922     | 0.008497297 | 6.897  | 1 |
| 230 | TERF2IP | ENST00000300086 | p.L329I | c.985     | 0.012815687 | 6.298  | 1 |
| 231 | INIP    | ENST00000374242 | p.F83S  | c.248     | 0.082303636 | 8.978  | 1 |
| 231 | INIP    | ENST00000374242 | p.L95R  | c.284     | 0.069859259 | 19.387 | 1 |
| 231 | INTS3   | ENST00000435409 | p.R346H | c.1037    | 1.002138491 | 0      | 2 |
| 231 | INTS3   | ENST00000435409 | p.S389F | c.1166    | 0.086091345 | 12.706 | 1 |
| 231 | INTS3   | ENST00000435409 | p.R439C | c.1315    | 0.062096479 | 17.85  | 1 |
| 232 | BTRC    | ENST00000370187 | p.R321Q | c.962     | 0.143697825 | 6.789  | 1 |
| 232 | CTNNB1  | ENST00000349496 | p.L31M  | c.91      | 0.009146971 | 13.745 | 1 |
| 232 | CTNNB1  | ENST00000349496 | p.D32H  | c.94      | 14.00911573 | 0      | 2 |
| 232 | CTNNB1  | ENST00000349496 | p.D32N  | c.94      | 14.00911573 | 0      | 6 |
| 232 | CTNNB1  | ENST00000349496 | p.D32Y  | c.94      | 14.00911573 | 0      | 4 |
| 232 | CTNNB1  | ENST00000349496 | p.D32G  | c.95      | 14.00911573 | 0      | 2 |
| 232 | CTNNB1  | ENST00000349496 | p.D32V  | c.95      | 14.00911573 | 0      | 1 |
| 233 | RPL17   | ENST00000579408 | p.R126H | c.377     | 0.00016768  | 12.542 | 1 |
| 233 | RPL4    | ENST00000307961 | p.Q89E  | c.265     | 0.00016768  | 0      | 1 |
| 234 | PPP2CA  | ENST00000481195 | p.R268H | c.803     | 0.009868182 | 6.663  | 1 |
| 234 | PPP2R5C | ENST00000422945 | p.S142Y | c.425     | 0.009868182 | 0      | 1 |
| 235 | BOC     | ENST00000273395 | p.S758N | c.2273    | 0.051904377 | 4.268  | 1 |
| 235 | DHH     | ENST00000266991 | p.R154H | c.461     | 0.051904377 | 0      | 1 |
| 236 | KPNA1   | ENST00000344337 | p.E357K | c.1069    | 0.003405755 | 8.226  | 1 |
| 236 | KPNA1   | ENST00000344337 | p.T361M | c.1082    | 0.011892771 | 6.41   | 1 |
| 236 | KPNA1   | ENST00000344337 | p.R395Q | c.1184    | 0.003457914 | 8.204  | 1 |
| 236 | KPNA1   | ENST00000344337 | p.G326W | c.976     | 0.0046661   | 7.77   | 1 |
| 236 | NUP50   | ENST00000347635 | p.R4G   | c.10      | 0.023072152 | 0      | 1 |
| 237 | CBLB    | ENST00000264122 | p.P910S | c.2728    | 0.006306258 | 0      | 1 |
| 237 | CD2AP   | ENST00000359314 | p.E35G  | c.104     | 0.006306258 | 7.309  | 1 |
| 238 | DDB1    | ENST00000301764 | p.R111H | c.332     | 0.04746474  | 5.397  | 1 |
| 238 | DDB2    | ENST00000256996 | p.R273C | c.817     | 1.02373237  | 0      | 2 |
| 239 | NR1I3   | ENST00000367980 | p.R313L | c.938     | 0.013987261 | 6.235  | 1 |
| 239 | PPARG   | ENST00000287820 | p.K432T | c.1295    | 0.054259805 | 4.223  | 1 |
| 239 | RXRA    | ENST00000481739 | p.Y397C | c.1190    | 0.0668252   | 0      | 1 |



|     |          |                 |         |           |             |        |   |
|-----|----------|-----------------|---------|-----------|-------------|--------|---|
| 240 | CXCL12   | ENST00000395794 | p.K75E  | c.223     | 0.411957801 | 0      | 1 |
| 240 | CXCR4    | ENST00000409817 | p.M28I  | c.84      | 0.119509982 | 3.467  | 1 |
| 240 | CXCR4    | ENST00000409817 | p.E30K  | c.88      | 0.350600923 | 1.637  | 1 |
| 241 | RBM39    | ENST00000253363 | p.R94H  | c.281     | 0.020645913 | 6.598  | 1 |
| 241 | TNPO1    | ENST00000337273 | p.L549I | c.1645    | 1.010322956 | 0      | 2 |
| 242 | PARVA    | ENST00000334956 | p.R409H | c.1226    | 0.004388671 | 7.832  | 1 |
| 242 | PXN      | ENST00000267257 | p.R147H | c.440     | 0.004388671 | 0      | 1 |
| 243 | SUMO1    | ENST00000409368 | p.P58L  | c.173     | 0.050625217 | 0      | 1 |
| 243 | UBA2     | ENST00000246548 | p.P163L | c.488     | 0.050625217 | 4.304  | 1 |
| 244 | ARHGDI A | ENST00000583868 | p.D45N  | c.133     | 0.071694884 | 3.918  | 1 |
| 244 | ARHGEF11 | ENST00000368194 | p.E777K | c.2329    | 0.089276085 | 3.578  | 1 |
| 244 | RHOA     | ENST00000418115 | p.Y34C  | c.101     | 0.14989175  | 0      | 1 |
| 245 | RPS10    | ENST00000344700 | p.R95P  | c.284     | 0.001272605 | 0      | 1 |
| 245 | RPS3     | ENST00000278572 | p.A71D  | c.212     | 0.001272605 | 9.618  | 1 |
| 246 | TCAP     | ENST00000309889 | p.Y81C  | c.242     | 0.007826004 | 0      | 1 |
| 246 | TTN      | ENST00000589042 | p.K98R  | c.293     | 0.005431136 | 7.528  | 1 |
| 246 | TTN      | ENST00000589042 | p.T101I | c.302     | 0.002420961 | 8.698  | 1 |
| 247 | IL7      | ENST00000263851 | p.S44N  | c.131     | 0.010521877 | 0      | 1 |
| 247 | IL7R     | ENST00000303115 | p.K97N  | c.291     | 0.004355059 | 7.852  | 1 |
| 247 | IL7R     | ENST00000303115 | p.F99L  | c.297     | 0.006220434 | 7.335  | 1 |
| 248 | RPS16    | ENST00000339471 | p.L47V  | c.139     | 0.000861699 | 12.929 | 1 |
| 248 | RPS25    | ENST00000527673 | p.V100L | c.298     | 0.061877693 | 4.017  | 1 |
| 248 | RPS5     | ENST00000598495 | p.E119K | c.355     | 0.061901887 | 0      | 1 |
| 248 | RPS5     | ENST00000598495 | p.F20L  | c.58      | 0.00067367  | 17.394 | 1 |
| 249 | IGLL1    | ENST00000330377 | p.S108G | c.322     | 0.049790006 | 0      | 1 |
| 249 | VPREB1   | ENST00000403807 | p.A32T  | c.94      | 0.049790006 | 4.328  | 1 |
| 250 | DKK1     | ENST00000373970 | p.N40K  | c.120     | 0.198588084 | 3.377  | 1 |
| 250 | DKK1     | ENST00000373970 | p.A41T  | c.121     | 0.132385221 | 3.985  | 1 |
| 250 | LRP6     | ENST00000261349 | p.W157F | c.471_470 | 1.159407862 | 0      | 2 |
| 251 | CDC7     | ENST00000428239 | p.D420N | c.1258    | 1.004183714 | 0      | 1 |
| 251 | CDC7     | ENST00000428239 | p.D420Y | c.1258    | 1.004183714 | 0      | 1 |
| 251 | DBF4     | ENST00000265728 | p.Y233C | c.698     | 0.008367428 | 7.901  | 1 |
| 252 | EGFR     | ENST00000275493 | p.G917A | c.2750    | 0.018058149 | 5.795  | 1 |
| 252 | EGFR     | ENST00000275493 | p.E922K | c.2764    | 0.002680565 | 8.569  | 1 |
| 252 | ERRFI1   | ENST00000377482 | p.P348Q | c.1043    | 0.020643864 | 0      | 1 |
| 253 | EXOSC4   | ENST00000316052 | p.I123M | c.369     | 0.016504463 | 5.921  | 1 |
| 253 | EXOSC7   | ENST00000265564 | p.E92A  | c.275     | 0.016504463 | 0      | 1 |
| 254 | GYPC     | ENST00000259254 | p.Y126D | c.376     | 0.004058043 | 7.945  | 1 |
| 254 | MPP1     | ENST00000393531 | p.I120S | c.359     | 0.004058043 | 0      | 1 |

|     |          |                 |          |           |             |        |   |
|-----|----------|-----------------|----------|-----------|-------------|--------|---|
| 255 | BIRC7    | ENST00000217169 | p.R136H  | c.407     | 0.004328326 | 7.89   | 1 |
| 255 | BIRC7    | ENST00000217169 | p.G137R  | c.409     | 0.004090101 | 7.972  | 1 |
| 255 | BIRC8    | ENST00000426466 | p.P55S   | c.163     | 0.004580365 | 7.808  | 1 |
| 255 | DIABLO   | ENST00000443649 | p.A56V   | c.167     | 0.030922973 | 0      | 1 |
| 255 | XIAP     | ENST00000371199 | p.P312F  | c.934_935 | 0.018493358 | 5.775  | 1 |
| 256 | CSNK2A1  | ENST00000349736 | p.S347G  | c.1039    | 0.068897829 | 0      | 1 |
| 256 | HCFC1    | ENST00000369984 | p.P1078L | c.3233    | 0.005893263 | 11.541 | 1 |
| 256 | HCFC1    | ENST00000369984 | p.E1084K | c.3250    | 0.020406443 | 12.595 | 1 |
| 256 | OGT      | ENST00000373719 | p.H568Y  | c.1702    | 0.066460197 | 4.049  | 1 |
| 256 | OGT      | ENST00000373719 | p.Y642H  | c.1924    | 0.028708012 | 6.968  | 1 |
| 257 | ETFA     | ENST00000557943 | p.I329T  | c.986     | 0.087716983 | 3.511  | 1 |
| 257 | ETFB     | ENST00000354232 | p.E334K  | c.1000    | 0.087716983 | 0      | 1 |
| 258 | AIMP2    | ENST00000223029 | p.P8T    | c.22      | 0.008559237 | 0      | 1 |
| 258 | KARS     | ENST00000319410 | p.Y369H  | c.1105    | 9.85E-05    | 13.309 | 1 |
| 258 | KARS     | ENST00000319410 | p.I131F  | c.391     | 0.000122315 | 13.009 | 1 |
| 258 | KARS     | ENST00000319410 | p.G177R  | c.529     | 6.42E-05    | 13.926 | 1 |
| 258 | KARS     | ENST00000319410 | p.K277N  | c.831     | 0.008276147 | 6.917  | 1 |
| 259 | IL13RA1  | ENST00000371666 | p.H69N   | c.205     | 0.005111633 | 0      | 1 |
| 259 | IL4      | ENST00000231449 | p.T132M  | c.395     | 0.005111633 | 7.612  | 1 |
| 260 | BMI1     | ENST00000376663 | p.T74S   | c.221     | 0.008638521 | 0      | 1 |
| 260 | RNF2     | ENST00000367510 | p.L58F   | c.174     | 0.008638521 | 6.855  | 1 |
| 261 | TSN      | ENST00000389682 | p.R182H  | c.545     | 0.007429918 | 7.075  | 1 |
| 261 | TSN      | ENST00000389682 | p.V208L  | c.622     | 0.001790602 | 9.136  | 1 |
| 261 | TSNAX    | ENST00000366639 | p.V206A  | c.617     | 0.009194155 | 0      | 1 |
| 262 | IL20RA   | ENST00000316649 | p.R192K  | c.575     | 0.091062445 | 3.457  | 1 |
| 262 | IL20RB   | ENST00000329582 | p.D148N  | c.442     | 0.091062445 | 0      | 1 |
| 263 | 6-Sep    | ENST00000394617 | p.R329H  | c.986     | 0.002887427 | 8.436  | 1 |
| 263 | 7-Sep    | ENST00000399034 | p.R148L  | c.443     | 0.002887427 | 0      | 1 |
| 264 | IGF1     | ENST00000307046 | p.D93N   | c.277     | 0.080546321 | 5.219  | 1 |
| 264 | IGFBP1   | ENST00000275525 | p.R177Q  | c.530     | 2.026848774 | 0      | 3 |
| 265 | CCNA2    | ENST00000274026 | p.E220K  | c.658     | 0.045048492 | 0      | 1 |
| 265 | CDKN1B   | ENST00000396340 | p.C29F   | c.86      | 0.01757624  | 5.87   | 1 |
| 265 | RB1      | ENST00000267163 | p.K873E  | c.2617    | 0.028428054 | 5.161  | 1 |
| 266 | FGA      | ENST00000302053 | p.C55S   | c.163     | 0.244685413 | 2.031  | 1 |
| 266 | FGB      | ENST00000302068 | p.C95S   | c.283     | 0.244685413 | 0      | 1 |
| 267 | AKAP13   | ENST00000361243 | p.R2015H | c.6044    | 0.081572836 | 5.94   | 1 |
| 267 | ARHGEF12 | ENST00000397843 | p.R800I  | c.2399    | 0.040096506 | 6.967  | 1 |
| 267 | RHOA     | ENST00000418115 | p.E40Q   | c.118     | 4.024281789 | 0      | 5 |
| 268 | NCOA2    | ENST00000452400 | p.R746C  | c.2236    | 0.030560933 | 6.758  | 1 |

|     |          |                 |                         |           |             |        |   |
|-----|----------|-----------------|-------------------------|-----------|-------------|--------|---|
| 268 | NCOR1    | ENST00000268712 | p.N2260K                | c.6780    | 0.0198641   | 18.828 | 1 |
| 268 | NR3C1    | ENST00000231509 | p.S725Y                 | c.2174    | 1.009350937 | 0      | 2 |
| 268 | NR3C1    | ENST00000231509 | p.E752K                 | c.2254    | 0.031695938 | 13.157 | 1 |
| 269 | CPSF6    | ENST00000266679 | p.K113N                 | c.339     | 0.043956861 | 0      | 1 |
| 269 | NUDT21   | ENST00000300291 | p.R68T                  | c.203     | 0.040261464 | 4.64   | 1 |
| 269 | NUDT21   | ENST00000300291 | p.I165T                 | c.494     | 0.004004206 | 8.021  | 1 |
| 270 | CAB39    | ENST00000409788 | p.F243V                 | c.727     | 0.001001932 | 0      | 1 |
| 270 | STK11    | ENST00000326873 | p.H168R                 | c.503     | 0.001001932 | 9.963  | 1 |
| 271 | BCL2L1   | ENST00000420653 | p.A149E                 | c.446     | 0.053775585 | 5.22   | 1 |
| 271 | TP53     | ENST00000445888 | p.H178Q                 | c.534     | 1.031138737 | 0      | 1 |
| 271 | TP53     | ENST00000445888 | p.R181P                 | c.542     | 0.003097545 | 16.21  | 1 |
| 271 | TP53     | ENST00000445888 | p.HHERCS178in_frame_del | c.548_531 | 1.031138737 | 0      | 1 |
| 271 | TP53BP2  | ENST00000343537 | p.P873L                 | c.2618    | 0.011777158 | 7.863  | 1 |
| 272 | SMAD2    | ENST00000402690 | p.D300N                 | c.898     | 0.129507766 | 5.156  | 1 |
| 272 | SMAD2    | ENST00000402690 | p.D304G                 | c.911     | 0.47875245  | 3.36   | 1 |
| 272 | SMAD2    | ENST00000402690 | p.P305L                 | c.914     | 1.153952922 | 5.992  | 1 |
| 272 | SMAD2    | ENST00000402690 | p.P305Q                 | c.914     | 1.153952922 | 5.992  | 1 |
| 272 | SMAD3    | ENST00000327367 | p.R268C                 | c.802     | 2.67258227  | 2.629  | 1 |
| 272 | SMAD3    | ENST00000327367 | p.R268H                 | c.803     | 2.67258227  | 2.629  | 2 |
| 272 | SMAD4    | ENST00000342988 | p.R531Q                 | c.1592    | 0.042034983 | 11.658 | 1 |
| 272 | SMAD4    | ENST00000342988 | p.L533R                 | c.1598    | 0.173860468 | 8.201  | 1 |
| 272 | SMAD4    | ENST00000342988 | p.D537Y                 | c.1609    | 3.645542562 | 0      | 1 |
| 272 | SMAD4    | ENST00000342988 | p.D537G                 | c.1610    | 3.645542562 | 0      | 1 |
| 272 | SMAD4    | ENST00000342988 | p.D537V                 | c.1610    | 3.645542562 | 0      | 1 |
| 272 | SMAD4    | ENST00000342988 | p.D537E                 | c.1611    | 3.645542562 | 0      | 1 |
| 273 | FARSA    | ENST00000588025 | p.R243W                 | c.727     | 0.013734993 | 6.186  | 1 |
| 273 | FARSB    | ENST00000281828 | p.H565D                 | c.1693    | 0.013734993 | 0      | 1 |
| 274 | IL17F    | ENST00000336123 | p.Y93F                  | c.278     | 0.01135916  | 6.46   | 1 |
| 274 | IL17RA   | ENST00000319363 | p.C126S                 | c.376     | 0.01135916  | 0      | 1 |
| 275 | C19orf40 | ENST00000588258 | p.V91I                  | c.271     | 0.006108357 | 0      | 1 |
| 275 | FANCM    | ENST00000267430 | p.R1914K                | c.5741    | 0.006108357 | 7.355  | 1 |
| 276 | INTS3    | ENST00000435409 | p.R334H                 | c.1001    | 0.075616428 | 3.742  | 1 |
| 276 | INTS3    | ENST00000435409 | p.L135M                 | c.403     | 0.01262114  | 6.412  | 1 |
| 276 | NABP2    | ENST00000267023 | p.E97Q                  | c.289     | 0.086482186 | 0      | 1 |
| 277 | ANK1     | ENST00000396942 | p.R941Q                 | c.2822    | 0.142694338 | 3.809  | 1 |
| 277 | SPTB     | ENST00000556626 | p.T1864I                | c.5591    | 1.071347169 | 0      | 2 |
| 278 | CBFB     | ENST00000412916 | p.R83L                  | c.248     | 0.070803402 | 5.405  | 1 |
| 278 | RUNX1    | ENST00000300305 | p.D198N                 | c.592     | 2.023601134 | 0      | 2 |
| 278 | RUNX1    | ENST00000300305 | p.D198G                 | c.593     | 2.023601134 | 0      | 1 |

|     |         |                 |          |        |             |        |   |
|-----|---------|-----------------|----------|--------|-------------|--------|---|
| 279 | DR1     | ENST00000370267 | p.K64N   | c.192  | 0.012560172 | 6.315  | 1 |
| 279 | TBP     | ENST00000392092 | p.R196Q  | c.587  | 0.012560172 | 0      | 1 |
| 280 | CASP7   | ENST00000369321 | p.R266W  | c.796  | 0.019986496 | 5.717  | 1 |
| 280 | CASP7   | ENST00000369321 | p.P268S  | c.802  | 0.05227156  | 4.285  | 1 |
| 280 | XIAP    | ENST00000371199 | p.I149M  | c.447  | 0.070307637 | 0      | 1 |
| 281 | CAND1   | ENST00000545606 | p.H1073L | c.3218 | 0.00892458  | 6.808  | 1 |
| 281 | CUL4B   | ENST00000404115 | p.S230I  | c.689  | 0.00892458  | 0      | 1 |
| 282 | EGFR    | ENST00000275493 | p.S645C  | c.1934 | 0.067078768 | 3.898  | 1 |
| 282 | ERBB2   | ENST00000269571 | p.S649T  | c.1946 | 0.067078768 | 0      | 1 |
| 283 | BCL9    | ENST00000234739 | p.K187R  | c.560  | 0.015810731 | 6.017  | 1 |
| 283 | BCL9    | ENST00000234739 | p.I200V  | c.598  | 0.024249651 | 5.388  | 1 |
| 283 | PYGO1   | ENST00000302000 | p.A378D  | c.1133 | 0.039322846 | 0      | 1 |
| 284 | ATRX    | ENST00000373344 | p.K251N  | c.753  | 0.016700094 | 0      | 1 |
| 284 | H3F3A   | ENST00000366813 | p.R3C    | c.7    | 0.016700094 | 5.904  | 1 |
| 285 | ITGA4   | ENST00000397033 | p.Q277R  | c.830  | 0.006385432 | 0      | 1 |
| 285 | ITGB7   | ENST00000267082 | p.A352T  | c.1054 | 0.006385432 | 7.291  | 1 |
| 286 | AXL     | ENST00000301178 | p.A79V   | c.236  | 0.040603278 | 4.681  | 1 |
| 286 | AXL     | ENST00000301178 | p.Q83R   | c.248  | 0.036240074 | 4.851  | 1 |
| 286 | AXL     | ENST00000301178 | p.G89D   | c.266  | 0.007779379 | 7.178  | 1 |
| 286 | GAS6    | ENST00000357389 | p.E374K  | c.1120 | 0.000367728 | 18.597 | 1 |
| 286 | GAS6    | ENST00000357389 | p.G245D  | c.734  | 0.080541525 | 0      | 1 |
| 287 | CCNA2   | ENST00000274026 | p.M189L  | c.565  | 0.069043238 | 4.085  | 1 |
| 287 | CCNA2   | ENST00000274026 | p.P309R  | c.926  | 0.046486533 | 4.68   | 1 |
| 287 | CCNB1   | ENST00000256442 | p.G298V  | c.893  | 0.131793964 | 3.077  | 1 |
| 287 | CCNE1   | ENST00000262643 | p.I119V  | c.355  | 0.017296962 | 6.136  | 1 |
| 287 | CDK2    | ENST00000553376 | p.R122G  | c.364  | 0.23065709  | 0      | 1 |
| 288 | IL1RL1  | ENST00000233954 | p.W25C   | c.75   | 0.050730599 | 5.301  | 1 |
| 288 | IL33    | ENST00000381434 | p.D149H  | c.445  | 1.025365299 | 0      | 1 |
| 288 | IL33    | ENST00000381434 | p.D149N  | c.445  | 1.025365299 | 0      | 1 |
| 289 | BMP2    | ENST00000378827 | p.K383N  | c.1149 | 0.016121697 | 5.969  | 1 |
| 289 | BMPR1A  | ENST00000372037 | p.E104K  | c.310  | 0.025818887 | 0      | 1 |
| 289 | GDF5    | ENST00000374372 | p.Q489K  | c.1465 | 0.010011832 | 6.665  | 1 |
| 290 | SNRPE   | ENST00000414487 | p.R30Q   | c.89   | 0.008869079 | 6.817  | 1 |
| 290 | SNRPG   | ENST00000454893 | p.V41M   | c.121  | 0.008869079 | 0      | 1 |
| 291 | CHRNA4  | ENST00000370263 | p.K140E  | c.418  | 0.014333259 | 0      | 1 |
| 291 | CHRN2   | ENST00000368476 | p.R174C  | c.520  | 0.004258388 | 7.89   | 1 |
| 291 | CHRN2   | ENST00000368476 | p.S175L  | c.524  | 0.010160176 | 6.627  | 1 |
| 292 | ANXA2   | ENST00000332680 | p.E24K   | c.70   | 0.010761328 | 0      | 1 |
| 292 | S100A10 | ENST00000368811 | p.P2L    | c.5    | 0.010761328 | 6.538  | 1 |

|     |          |                 |                     |             |             |        |   |
|-----|----------|-----------------|---------------------|-------------|-------------|--------|---|
| 293 | C8A      | ENST00000361249 | p.R577Q             | c.1730      | 0.023199264 | 0      | 1 |
| 293 | C8B      | ENST00000371237 | p.I63V              | c.187       | 0.004280964 | 7.895  | 1 |
| 293 | C8B      | ENST00000371237 | p.E98K              | c.292       | 0.019077928 | 5.718  | 1 |
| 294 | NEBL     | ENST00000377122 | p.D971Y             | c.2911      | 0.0233085   | 0      | 1 |
| 294 | XIRP2    | ENST00000295237 | p.P2427L            | c.7280      | 0.0233085   | 5.423  | 1 |
| 295 | ITGAX    | ENST00000562522 | p.R502S             | c.1506_1507 | 0.03321106  | 4.924  | 1 |
| 295 | ITGAX    | ENST00000562522 | p.W505C             | c.1515      | 0.008488686 | 6.927  | 1 |
| 295 | ITGB2    | ENST00000397850 | p.P616S             | c.1846      | 0.04115834  | 0      | 1 |
| 296 | IL22     | ENST00000328087 | p.F57S              | c.170       | 0.056798632 | 4.138  | 1 |
| 296 | IL22RA1  | ENST00000270800 | p.W208L             | c.623       | 0.056798632 | 0      | 1 |
| 297 | SKA1     | ENST00000398452 | p.D83Y              | c.247       | 0.001996931 | 8.968  | 1 |
| 297 | SKA3     | ENST00000314759 | p.M91I              | c.273       | 0.001996931 | 0      | 1 |
| 298 | SNRPB    | ENST00000438552 | p.K32E              | c.94        | 0.008807816 | 6.827  | 1 |
| 298 | SNRPD3   | ENST00000404603 | p.P6S               | c.16        | 0.008807816 | 0      | 1 |
| 299 | IGF2     | ENST00000434045 | p.F99L              | c.295       | 0.01270295  | 0      | 1 |
| 299 | IGF2R    | ENST00000356956 | p.E1544G            | c.4631      | 0.003418025 | 8.206  | 1 |
| 299 | IGF2R    | ENST00000356956 | p.F1638in_frame_del | c.4907_4909 | 0.009348026 | 6.746  | 1 |
| 300 | ARHGDI1  | ENST00000583868 | p.S124F             | c.371       | 0.098831095 | 4.347  | 1 |
| 300 | RHOA     | ENST00000418115 | p.F106L             | c.318       | 1.060411461 | 0      | 2 |
| 300 | ROCK1    | ENST00000399799 | p.R1012Q            | c.3035      | 0.023099694 | 6.471  | 1 |
| 301 | DNMT3A   | ENST00000321117 | p.R736H             | c.2207      | 1.009868182 | 0      | 2 |
| 301 | DNMT3L   | ENST00000270172 | p.L267P             | c.800       | 0.019736363 | 6.663  | 1 |
| 302 | CCNK     | ENST00000389879 | p.H85Y              | c.253       | 0.025383203 | 0      | 1 |
| 302 | CDK12    | ENST00000447079 | p.R722C             | c.2164      | 0.019780486 | 5.668  | 1 |
| 302 | CDK12    | ENST00000447079 | p.F802V             | c.2404      | 0.005827527 | 7.451  | 1 |
| 303 | BIN1     | ENST00000316724 | p.L541H             | c.1622      | 1.006946013 | 0      | 1 |
| 303 | BIN1     | ENST00000316724 | p.L541R             | c.1622      | 1.006946013 | 0      | 1 |
| 303 | MYC      | ENST00000377970 | p.T73P              | c.217       | 1.003805411 | 9.04   | 2 |
| 303 | MYC      | ENST00000377970 | p.P74L              | c.221       | 0.006305114 | 8.312  | 1 |
| 304 | F2       | ENST00000311907 | p.A405T             | c.1213      | 0.255450765 | 0      | 1 |
| 304 | F2       | ENST00000311907 | p.G569E             | c.1706      | 0.054601758 | 14.345 | 1 |
| 304 | F2       | ENST00000311907 | p.P577S             | c.1729      | 0.000592674 | 13.706 | 1 |
| 304 | F2RL3    | ENST00000248076 | p.P46L              | c.137       | 0.163593753 | 2.768  | 1 |
| 304 | SERPINC1 | ENST00000367698 | p.S426L             | c.1277      | 0.124462077 | 3.204  | 1 |
| 304 | SERPIND1 | ENST00000406799 | p.T457M             | c.1370      | 0.054241521 | 18.55  | 1 |
| 305 | RAN      | ENST00000448750 | p.M197I             | c.591       | 0.061767853 | 4.017  | 1 |
| 305 | RANBP2   | ENST00000283195 | p.A1272T            | c.3814      | 0.061767853 | 0      | 1 |
| 306 | E2F1     | ENST00000343380 | p.V246A             | c.737       | 0.011657251 | 0      | 1 |
| 306 | E2F1     | ENST00000343380 | p.D294N             | c.880       | 0.003271602 | 17.068 | 1 |

|     |         |                 |           |           |             |       |   |
|-----|---------|-----------------|-----------|-----------|-------------|-------|---|
| 306 | TFDP1   | ENST00000375370 | p.P260H   | c.779     | 0.005514927 | 8.809 | 1 |
| 306 | TFDP1   | ENST00000375370 | p.MA305IS | c.915_916 | 0.009441377 | 6.73  | 1 |
| 307 | IL1A    | ENST00000263339 | p.A195V   | c.584     | 0.093364922 | 3.694 | 1 |
| 307 | IL1A    | ENST00000263339 | p.N220S   | c.659     | 0.22443602  | 2.263 | 1 |
| 307 | S100A13 | ENST00000368699 | p.R29Q    | c.86      | 0.285605506 | 0     | 1 |
| 308 | C1QB    | ENST00000314933 | p.G234D   | c.701     | 0.031380236 | 4.994 | 1 |
| 308 | C1QC    | ENST00000374640 | p.T191I   | c.572     | 0.031380236 | 0     | 1 |
| 309 | APITD1  | ENST00000602787 | p.E52K    | c.154     | 0.022189177 | 0     | 1 |
| 309 | FANCM   | ENST00000267430 | p.E702D   | c.2106    | 0.022189177 | 5.494 | 1 |
| 310 | CLIP1   | ENST00000540338 | p.W87L    | c.260     | 0.070316155 | 3.83  | 1 |
| 310 | SLAIN2  | ENST00000264313 | p.Y581H   | c.1741    | 0.070316155 | 0     | 1 |
| 311 | BUB1B   | ENST00000412359 | p.V29E    | c.86      | 0.024774504 | 0     | 1 |
| 311 | CDC20   | ENST00000372462 | p.R445Q   | c.1334    | 0.024774504 | 5.335 | 1 |
| 312 | PEX19   | ENST00000368072 | p.L21P    | c.62      | 0.016458766 | 0     | 1 |
| 312 | PEX3    | ENST00000367591 | p.H198R   | c.593     | 0.016458766 | 5.925 | 1 |
| 313 | IL17A   | ENST00000340057 | p.E83Q    | c.247     | 0.0168647   | 5.9   | 1 |
| 313 | IL17A   | ENST00000340057 | p.R124K   | c.371     | 0.007178808 | 7.146 | 1 |
| 313 | IL17RA  | ENST00000319363 | p.G171W   | c.511     | 0.023807029 | 0     | 1 |
| 314 | HIF1AN  | ENST00000299163 | p.I306V   | c.916     | 0.050205875 | 0     | 1 |
| 314 | TNKS2   | ENST00000371627 | p.V542L   | c.1624    | 0.050205875 | 4.316 | 1 |
| 315 | GH1     | ENST00000323322 | p.Y129C   | c.386     | 0.060850981 | 4.07  | 1 |
| 315 | GH1     | ENST00000323322 | p.I205M   | c.615     | 0.023331743 | 5.505 | 1 |
| 315 | GHR     | ENST00000230882 | p.D182A   | c.545     | 0.081560512 | 0     | 1 |
| 316 | CBL     | ENST00000264033 | p.K322T   | c.965     | 0.003219383 | 8.279 | 1 |
| 316 | SPRY2   | ENST00000377102 | p.E57G    | c.170     | 0.003219383 | 0     | 1 |
| 317 | HCFC1   | ENST00000369984 | p.T1092I  | c.3275    | 0.2984227   | 0     | 1 |
| 317 | HCFC1   | ENST00000369984 | p.T1093S  | c.3277    | 0.10806141  | 6.692 | 1 |
| 317 | OGT     | ENST00000373719 | p.N335T   | c.1004    | 0.221655664 | 3.034 | 1 |
| 317 | OGT     | ENST00000373719 | p.D396N   | c.1186    | 0.206179978 | 2.585 | 1 |
| 318 | RPL18A  | ENST00000222247 | p.P25T    | c.73      | 0.001272359 | 9.62  | 1 |
| 318 | RPL18A  | ENST00000222247 | p.P26H    | c.77      | 0.001195502 | 9.71  | 1 |
| 318 | RPL21   | ENST00000326092 | p.N144T   | c.431     | 0.002464826 | 0     | 1 |
| 319 | IRAK2   | ENST00000256458 | p.W11C    | c.33      | 0.006381008 | 7.292 | 1 |
| 319 | IRAK4   | ENST00000448290 | p.I53V    | c.157     | 0.006381008 | 0     | 1 |
| 320 | DLAT    | ENST00000393051 | p.H218D   | c.652     | 0.029930538 | 0     | 1 |
| 320 | PDK3    | ENST00000441463 | p.R378H   | c.1133    | 0.018766688 | 5.752 | 1 |
| 320 | PDK3    | ENST00000441463 | p.T383M   | c.1148    | 0.011585987 | 6.458 | 1 |
| 321 | NCF2    | ENST00000367535 | p.V356E   | c.1067    | 0.014843756 | 0     | 1 |
| 321 | NCF4    | ENST00000248899 | p.T337M   | c.1010    | 0.014843756 | 6.074 | 1 |

|     |         |                 |                   |           |             |       |   |
|-----|---------|-----------------|-------------------|-----------|-------------|-------|---|
| 322 | S100A8  | ENST00000368733 | p.Q69H            | c.207     | 0.036814905 | 0     | 1 |
| 322 | S100A9  | ENST00000368738 | p.D65G            | c.194     | 0.011034129 | 6.539 | 1 |
| 322 | S100A9  | ENST00000368738 | p.E78V            | c.233     | 0.004438122 | 7.862 | 1 |
| 322 | S100A9  | ENST00000368738 | p.A84V            | c.251     | 0.022090256 | 5.522 | 1 |
| 323 | BTRC    | ENST00000370187 | p.R187W           | c.559     | 0.028320686 | 5.142 | 1 |
| 323 | SKP1    | ENST00000353411 | p.K80R            | c.239     | 0.028320686 | 0     | 1 |
| 324 | RND3    | ENST00000375734 | p.R140Q           | c.419     | 0.105257869 | 0     | 1 |
| 324 | ROCK1   | ENST00000399799 | p.N295K           | c.885     | 0.105257869 | 3.248 | 1 |
| 325 | HDAC4   | ENST00000345617 | p.P352L           | c.1055    | 0.011958914 | 0     | 1 |
| 325 | YWHAG   | ENST00000307630 | p.S46C            | c.137     | 0.005150184 | 7.611 | 1 |
| 325 | YWHAG   | ENST00000307630 | p.G174V           | c.521     | 0.006878744 | 7.191 | 1 |
| 326 | CSTA    | ENST00000264474 | p.L27P            | c.80      | 0.013868927 | 6.172 | 1 |
| 326 | CTSL    | ENST00000340342 | p.R153W           | c.457     | 0.013868927 | 0     | 1 |
| 327 | DDX6    | ENST00000526070 | p.R443C           | c.1327    | 0.075154328 | 3.734 | 1 |
| 327 | EDC3    | ENST00000315127 | p.I222V           | c.664     | 0.075154328 | 0     | 1 |
| 328 | GGA3    | ENST00000245541 | p.L656S           | c.1967    | 0.114943756 | 3.121 | 1 |
| 328 | RABEP1  | ENST00000262477 | p.A445G           | c.1334    | 0.114943756 | 0     | 1 |
| 329 | H2AFX   | ENST00000530167 | p.R78Q            | c.233     | 0.010151803 | 0     | 1 |
| 330 | NTRK1   | ENST00000524377 | p.H489Q           | c.1467    | 0.006973023 | 0     | 1 |
| 330 | SHC1    | ENST00000448116 | p.P151L           | c.452     | 0.006973023 | 7.164 | 1 |
| 331 | CCND1   | ENST00000227507 | p.F108L           | c.322     | 0.036498981 | 0     | 1 |
| 331 | CDK4    | ENST00000257904 | p.G48in_frame_del | c.134_132 | 0.036498981 | 4.776 | 1 |
| 332 | C5      | ENST00000223642 | p.S458T           | c.1372    | 0.019130256 | 0     | 1 |
| 332 | C6      | ENST00000263413 | p.E170K           | c.508     | 0.019130256 | 5.708 | 1 |
| 333 | PPP2R1A | ENST00000322088 | p.R28C            | c.82      | 1.003433748 | 0     | 2 |
| 333 | PPP2R2A | ENST00000315985 | p.R179Q           | c.536     | 0.006867497 | 8.186 | 1 |
| 334 | EIF4E   | ENST00000505992 | p.R128C           | c.382     | 1.003127011 | 0     | 1 |
| 334 | EIF4E   | ENST00000505992 | p.R128H           | c.383     | 1.003127011 | 0     | 1 |
| 334 | EIF4G1  | ENST00000352767 | p.E429Q           | c.1285    | 0.006254022 | 8.321 | 1 |
| 335 | LY96    | ENST00000284818 | p.D101H           | c.301     | 1.19039356  | 0     | 1 |
| 335 | LY96    | ENST00000284818 | p.D101N           | c.301     | 1.19039356  | 0     | 1 |
| 335 | TLR4    | ENST00000355622 | p.V338A           | c.1013    | 0.018032422 | 6.919 | 1 |
| 335 | TLR4    | ENST00000355622 | p.R264K           | c.791     | 0.328167086 | 2.628 | 1 |
| 335 | TLR4    | ENST00000355622 | p.A291P           | c.871     | 0.044185482 | 5.618 | 1 |
| 336 | TP53BP2 | ENST00000343537 | p.S1030I          | c.3089    | 0.052954363 | 0     | 1 |
| 336 | TP73    | ENST00000378295 | p.P195L           | c.584     | 0.002922917 | 8.489 | 1 |
| 336 | TP73    | ENST00000378295 | p.D202N           | c.604     | 0.050310727 | 4.317 | 1 |
| 337 | PPP2CA  | ENST00000481195 | p.V126A           | c.377     | 0.025225034 | 0     | 1 |
| 337 | PPP2R5C | ENST00000422945 | p.P330S           | c.988     | 0.025225034 | 5.309 | 1 |

|     |          |                 |                   |           |             |        |   |
|-----|----------|-----------------|-------------------|-----------|-------------|--------|---|
| 338 | HIST2H3D | ENST00000331491 | p.A8V             | c.23      | 0.008375559 | 6.906  | 1 |
| 338 | HIST2H3D | ENST00000331491 | p.R9C             | c.25      | 0.004483932 | 7.813  | 1 |
| 338 | SPIN1    | ENST00000375859 | p.D173H           | c.517     | 0.012785331 | 0      | 1 |
| 339 | FSHB     | ENST00000533718 | p.F124L           | c.370     | 0.006853231 | 0      | 1 |
| 339 | FSHR     | ENST00000406846 | p.E34K            | c.100     | 0.006853231 | 7.189  | 1 |
| 340 | RPL23A   | ENST00000394938 | p.K77in_frame_del | c.223_225 | 1.00108437  | 0      | 2 |
| 340 | RPL23A   | ENST00000394938 | p.I78T            | c.233     | 0.007329157 | 16.994 | 1 |
| 340 | RPL23A   | ENST00000394938 | p.R79C            | c.235     | 0.013999246 | 16.053 | 1 |
| 340 | RPL7A    | ENST00000323345 | p.R53S            | c.157     | 0.023187639 | 9.879  | 1 |
| 341 | BCL6     | ENST00000232014 | p.L112P           | c.335     | 0.010554485 | 0      | 1 |
| 341 | BCOR     | ENST00000378444 | p.W509C           | c.1527    | 0.010554485 | 6.566  | 1 |
| 342 | SUPT4H1  | ENST00000580947 | p.A62V            | c.185     | 0.010194961 | 6.616  | 1 |
| 342 | SUPT5H   | ENST00000432763 | p.T192S           | c.574     | 0.010194961 | 0      | 1 |
| 343 | ITGAX    | ENST00000562522 | p.R426C           | c.1276    | 1.029725816 | 0      | 1 |
| 343 | ITGAX    | ENST00000562522 | p.R426S           | c.1276    | 1.029725816 | 0      | 1 |
| 343 | ITGB2    | ENST00000397850 | p.E234Q           | c.700     | 0.042487163 | 5.563  | 1 |
| 343 | ITGB2    | ENST00000397850 | p.D265Y           | c.793     | 0.017327153 | 6.866  | 1 |
| 344 | RPL18    | ENST00000550645 | p.G84E            | c.251     | 0.000694374 | 0      | 1 |
| 344 | RPL4     | ENST00000307961 | p.M284T           | c.851     | 0.000694374 | 10.492 | 1 |
| 345 | CHMP6    | ENST00000572778 | p.P153L           | c.458     | 0.016299822 | 5.939  | 1 |
| 345 | VPS4A    | ENST00000254950 | p.A28V            | c.83      | 0.016299822 | 0      | 1 |
| 346 | CSF3     | ENST00000225474 | p.A144S           | c.430     | 0.008986655 | 6.798  | 1 |
| 346 | CSF3R    | ENST00000373103 | p.Q197H           | c.591     | 0.008986655 | 0      | 1 |
| 347 | CD180    | ENST00000256447 | p.G110E           | c.329     | 0.000703091 | 10.474 | 1 |
| 347 | LY86     | ENST00000230568 | p.I72T            | c.215     | 0.000703091 | 0      | 1 |
| 348 | RAN      | ENST00000448750 | p.H48Y            | c.142     | 0.043128591 | 11.546 | 1 |
| 348 | RAN      | ENST00000448750 | p.T50I            | c.149     | 0.271544748 | 3.772  | 1 |
| 348 | RANBP2   | ENST00000283195 | p.R1203C          | c.3607    | 1.082361218 | 0      | 2 |
| 348 | RANBP2   | ENST00000283195 | p.R1236L          | c.3707    | 0.176118099 | 6.824  | 1 |
| 349 | KPNB1    | ENST00000290158 | p.Y529C           | c.1586    | 0.002941974 | 9.409  | 1 |
| 349 | SNAI1    | ENST00000244050 | p.R243W           | c.727     | 1.001470987 | 0      | 1 |
| 349 | SNAI1    | ENST00000244050 | p.R243Q           | c.728     | 1.001470987 | 0      | 1 |
| 350 | CCNC     | ENST00000520429 | p.K96T            | c.287     | 0.114209319 | 0      | 1 |
| 350 | CDK8     | ENST00000381527 | p.S60P            | c.178     | 0.04448022  | 4.592  | 1 |
| 350 | CDK8     | ENST00000381527 | p.R65K            | c.194     | 0.075761718 | 3.781  | 1 |
| 351 | SMAD3    | ENST00000327367 | p.R243C           | c.727     | 0.083562531 | 3.581  | 1 |
| 351 | SMAD4    | ENST00000342988 | p.E337K           | c.1009    | 0.083562531 | 0      | 1 |
| 352 | SKA1     | ENST00000398452 | p.V48I            | c.142     | 0.006002569 | 0      | 1 |
| 352 | SKA2     | ENST00000330137 | p.S55P            | c.163     | 0.005193098 | 7.656  | 1 |



|            |                 |                      |         |             |        |   |
|------------|-----------------|----------------------|---------|-------------|--------|---|
| 352 SKA3   | ENST00000314759 | p.H48Y               | c.142   | 0.001279488 | 9.903  | 1 |
| 353 IL4R   | ENST00000395762 | p.V490I              | c.1468  | 0.006104124 | 0      | 1 |
| 353 IRS1   | ENST00000305123 | p.E251K              | c.751   | 0.006104124 | 7.356  | 1 |
| 354 NGF    | ENST00000369512 | p.E132K              | c.394   | 1.042920962 | 0      | 2 |
| 354 NGF    | ENST00000369512 | p.R224Q              | c.671   | 0.007416939 | 11.745 | 1 |
| 354 NTRK1  | ENST00000524377 | p.H298Q              | c.894   | 0.092093496 | 4.552  | 1 |
| 355 KPNB1  | ENST00000290158 | p.N285D              | c.853   | 0.170698993 | 0      | 1 |
| 355 SNAI1  | ENST00000244050 | p.R220C              | c.658   | 0.007637217 | 7.252  | 1 |
| 355 SNAI1  | ENST00000244050 | p.R247P              | c.740   | 0.085581299 | 3.674  | 1 |
| 355 SNUPN  | ENST00000371091 | p.R69H               | c.206   | 0.093077117 | 3.543  | 1 |
| 356 ARL1   | ENST00000551671 | p.R19K               | c.56    | 0.019937701 | 0      | 1 |
| 356 GOLGA4 | ENST00000356847 | p.R2204C             | c.6610  | 0.000605595 | 10.717 | 1 |
| 356 GOLGA4 | ENST00000356847 | p.E2205Q             | c.6613  | 0.01935509  | 5.692  | 1 |
| 357 NAE1   | ENST00000359087 | p.L79V               | c.235   | 0.017627846 | 5.826  | 1 |
| 357 UBA3   | ENST00000361055 | p.W34L               | c.101   | 0.017627846 | 0      | 1 |
| 358 BCKDHA | ENST00000595085 | p.T245M              | c.734   | 0.132650803 | 0      | 1 |
| 358 BCKDHB | ENST00000356489 | p.E163K              | c.487   | 0.123679146 | 3.03   | 1 |
| 358 BCKDHB | ENST00000356489 | p.Y167C              | c.500   | 0.011474875 | 6.612  | 1 |
| 359 IL2    | ENST00000226730 | p.M43I               | c.129   | 0.11786669  | 0      | 1 |
| 359 IL2RB  | ENST00000216223 | p.R41T               | c.122   | 0.021380008 | 5.683  | 1 |
| 359 IL2RB  | ENST00000216223 | p.H159N              | c.475   | 0.107733118 | 3.357  | 1 |
| 359 IL2RG  | ENST00000374202 | p.R205I              | c.614   | 0.009054464 | 10.281 | 1 |
| 361 CD180  | ENST00000256447 | p.N228T              | c.683   | 1.000984037 | 0      | 2 |
| 361 LY86   | ENST00000230568 | p.E103G              | c.308   | 0.001968074 | 9.989  | 1 |
| 362 CLIP1  | ENST00000540338 | p.R1416C             | c.4246  | 0.148033951 | 2.756  | 1 |
| 362 DCTN1  | ENST00000361874 | p.Q95H               | c.285   | 0.148033951 | 0      | 1 |
| 363 MAP2K5 | ENST00000178640 | p.SGA26in_frame_delR | c.78_83 | 0.089808761 | 3.477  | 1 |
| 363 MAPK7  | ENST00000308406 | p.P211S              | c.631   | 0.089808761 | 0      | 1 |
| 364 ENY2   | ENST00000521688 | p.K30R               | c.89    | 0.047815968 | 0      | 1 |
| 364 MCM3AP | ENST00000397708 | p.R1179H             | c.3536  | 0.020596262 | 5.641  | 1 |
| 364 MCM3AP | ENST00000397708 | p.Q1227H             | c.3681  | 0.028332961 | 5.17   | 1 |
| 365 F3     | ENST00000334047 | p.C81F               | c.242   | 0.045562793 | 4.456  | 1 |
| 365 F7     | ENST00000375581 | p.T143M              | c.428   | 0.045562793 | 0      | 1 |
| 366 UBE2N  | ENST00000550657 | p.R70L               | c.209   | 0.040838231 | 0      | 1 |
| 366 UBE2N  | ENST00000550657 | p.N31K               | c.93    | 0.008347708 | 13.083 | 1 |
| 366 UBE2V2 | ENST00000518360 | p.D46G               | c.137   | 0.027096072 | 5.226  | 1 |
| 366 UBE2V2 | ENST00000523111 | p.R11H               | c.32    | 0.022607725 | 6.158  | 1 |
| 367 ERCC1  | ENST00000013807 | p.L285M              | c.853   | 0.117521775 | 3.089  | 1 |
| 367 ERCC4  | ENST00000311895 | p.E840K              | c.2518  | 0.117521775 | 0      | 1 |

|     |          |                 |                    |           |             |       |   |
|-----|----------|-----------------|--------------------|-----------|-------------|-------|---|
| 368 | DNMT3A   | ENST00000321117 | p.A741V            | c.2222    | 0.002555817 | 0     | 1 |
| 368 | DNMT3L   | ENST00000270172 | p.G275S            | c.823     | 0.002555817 | 8.612 | 1 |
| 369 | KAT8     | ENST00000448516 | p.G347S            | c.1039    | 0.001208877 | 9.71  | 1 |
| 369 | KAT8     | ENST00000448516 | p.L400M            | c.1198    | 0.001031624 | 9.939 | 1 |
| 369 | KAT8     | ENST00000448516 | p.W192S            | c.575     | 0.011479382 | 6.448 | 1 |
| 369 | MSL1     | ENST00000398532 | p.V475I            | c.1423    | 0.013666761 | 0     | 1 |
| 370 | RNASEH2A | ENST00000221486 | p.G292C            | c.874     | 0.00337944  | 8.209 | 1 |
| 370 | RNASEH2B | ENST00000336617 | p.G83C             | c.247     | 0.00337944  | 0     | 1 |
| 371 | ICAM1    | ENST00000264832 | p.M91T             | c.272     | 0.016700094 | 5.904 | 1 |
| 371 | ITGAL    | ENST00000356798 | p.T231A            | c.691     | 0.016700094 | 0     | 1 |
| 372 | ARRDC3   | ENST00000265138 | p.E344K            | c.1030    | 0.2738673   | 1.924 | 1 |
| 372 | NEDD4    | ENST00000508342 | p.W868S            | c.2603    | 0.302777305 | 0     | 1 |
| 372 | SCNN1A   | ENST00000360168 | p.P701L            | c.2102    | 0.049598894 | 4.671 | 1 |
| 373 | RPL13A   | ENST00000391857 | p.R61W             | c.181     | 0.006702736 | 7.247 | 1 |
| 373 | RPL13A   | ENST00000467825 | p.T64N             | c.191     | 0.018280716 | 5.783 | 1 |
| 373 | RPL3     | ENST00000216146 | p.R261H            | c.782     | 0.024744336 | 0     | 1 |
| 374 | RPS4X    | ENST00000316084 | p.D151N            | c.451     | 0.033749267 | 0     | 1 |
| 374 | RPS6     | ENST00000380394 | p.R216K            | c.647     | 0.033749267 | 4.889 | 1 |
| 375 | PTH1R    | ENST00000449590 | p.V419I            | c.1255    | 0.07209285  | 4.794 | 1 |
| 375 | PTHLH    | ENST00000354417 | p.R57Q             | c.170     | 1.036046425 | 0     | 2 |
| 376 | RPA2     | ENST00000313433 | p.G155W            | c.463     | 0.006633564 | 7.236 | 1 |
| 376 | RPA3     | ENST00000223129 | p.V118M            | c.352     | 0.006633564 | 0     | 1 |
| 377 | IRAK4    | ENST00000448290 | p.R12C             | c.34      | 0.019011287 | 5.717 | 1 |
| 377 | MYD88    | ENST00000417037 | p.F49L             | c.147     | 0.019011287 | 0     | 1 |
| 378 | TGFBR1   | ENST00000552516 | p.K91N             | c.273     | 0.035255692 | 0     | 1 |
| 378 | TGFBR2   | ENST00000359013 | p.D166in_frame_del | c.495_497 | 0.035255692 | 4.826 | 1 |
| 379 | RAD1     | ENST00000382038 | p.E169K            | c.505     | 0.117440344 | 0     | 1 |
| 379 | RAD9A    | ENST00000307980 | p.R85C             | c.253     | 0.117440344 | 3.09  | 1 |
| 380 | C3       | ENST00000245907 | p.G262R            | c.784     | 0.006587743 | 0     | 1 |
| 380 | VSIG4    | ENST00000374737 | p.R85C             | c.253     | 0.006587743 | 7.246 | 1 |
| 381 | BMI1     | ENST00000376663 | p.T5M              | c.14      | 0.010216182 | 6.613 | 1 |
| 381 | RNF2     | ENST00000367510 | p.P115S            | c.343     | 0.010216182 | 0     | 1 |
| 382 | CGA      | ENST00000369582 | p.C31Y             | c.92      | 0.012107124 | 6.368 | 1 |
| 382 | CGB8     | ENST00000448456 | p.F4S              | c.11      | 0.012107124 | 0     | 1 |
| 383 | CSTA     | ENST00000264474 | p.E15D             | c.45      | 0.0078125   | 0     | 1 |
| 383 | CTSB     | ENST00000453527 | p.H269Q            | c.807     | 0.0078125   | 7     | 1 |
| 384 | CBLB     | ENST00000264122 | p.R911C            | c.2731    | 0.013461659 | 6.215 | 1 |
| 384 | SH3KBP1  | ENST00000397821 | p.Q13K             | c.37      | 0.013461659 | 0     | 1 |
| 385 | DNMT3A   | ENST00000321117 | p.R720H            | c.2159    | 0.033475404 | 8.678 | 1 |

|            |                 |          |           |             |        |   |
|------------|-----------------|----------|-----------|-------------|--------|---|
| 385 DNMT3A | ENST00000321117 | p.R729W  | c.2185    | 2.095804869 | 0      | 1 |
| 385 DNMT3A | ENST00000321117 | p.R729Q  | c.2186    | 2.095804869 | 0      | 2 |
| 385 DNMT3L | ENST00000270172 | p.F261L  | c.783     | 0.306240843 | 3.421  | 1 |
| 386 ATXN2  | ENST00000377617 | p.Q928H  | c.2784    | 0.035550163 | 0      | 1 |
| 386 PABPC1 | ENST00000318607 | p.R565W  | c.1693    | 0.035550163 | 4.814  | 1 |
| 387 H2AFY  | ENST00000510038 | p.T175I  | c.524     | 0.051679474 | 6.1    | 1 |
| 387 SPOP   | ENST00000393331 | p.Y87S   | c.260     | 0.008290971 | 13.076 | 1 |
| 387 SPOP   | ENST00000393331 | p.W131G  | c.391     | 2.014694447 | 0      | 1 |
| 387 SPOP   | ENST00000393331 | p.W131R  | c.391     | 2.014694447 | 0      | 1 |
| 387 SPOP   | ENST00000393331 | p.W131C  | c.393     | 2.014694447 | 0      | 1 |
| 388 PABPC1 | ENST00000318607 | p.E557G  | c.1670    | 0.020832792 | 0      | 1 |
| 388 PAIP1  | ENST00000306846 | p.S143R  | c.429     | 0.020832792 | 5.585  | 1 |
| 389 RPS21  | ENST00000370592 | p.K41T   | c.122     | 0.000959121 | 11.026 | 1 |
| 389 RPSA   | ENST00000443003 | p.R196C  | c.586     | 1.00047956  | 0      | 1 |
| 389 RPSA   | ENST00000443003 | p.R196H  | c.587     | 1.00047956  | 0      | 1 |
| 390 RPL11  | ENST00000374550 | p.R146H  | c.437     | 8.36E-05    | 13.546 | 1 |
| 390 RPL5   | ENST00000370321 | p.T154I  | c.461     | 8.36E-05    | 0      | 1 |
| 392 PDE6D  | ENST00000287600 | p.R48H   | c.143     | 0.009999003 | 6.644  | 1 |
| 392 RPGR   | ENST00000378505 | p.R323C  | c.967     | 0.009999003 | 0      | 1 |
| 393 IL17F  | ENST00000336123 | p.E114G  | c.341     | 0.008104843 | 6.947  | 1 |
| 393 IL17RA | ENST00000319363 | p.E247Q  | c.739     | 0.008104843 | 0      | 1 |
| 394 NOTCH1 | ENST00000277541 | p.R1937H | c.5810    | 0.007758535 | 0      | 1 |
| 394 RBPJ   | ENST00000342295 | p.E447Q  | c.1339    | 0.007758535 | 7.01   | 1 |
| 395 OSBP   | ENST00000263847 | p.N371H  | c.1111    | 0.011319861 | 0      | 1 |
| 395 VAPA   | ENST00000340541 | p.R57P   | c.170     | 0.011319861 | 6.465  | 1 |
| 396 C3     | ENST00000245907 | p.P1662H | c.4985    | 0.1209662   | 0      | 1 |
| 396 CFB    | ENST00000425368 | p.S351L  | c.1052    | 0.103698733 | 3.297  | 1 |
| 396 CFB    | ENST00000425368 | p.S278T  | c.832     | 0.021179137 | 5.701  | 1 |
| 397 CADM1  | ENST00000331581 | p.P91S   | c.271     | 1.027212094 | 0      | 2 |
| 397 CRTAM  | ENST00000227348 | p.S46F   | c.137     | 0.030725655 | 6.033  | 1 |
| 397 CRTAM  | ENST00000227348 | p.Q49K   | c.144_145 | 0.024063233 | 6.388  | 1 |
| 398 GTF2A2 | ENST00000396060 | p.C68F   | c.203     | 0.012770865 | 7.291  | 1 |
| 398 TBP    | ENST00000392092 | p.R186C  | c.556     | 1.006385432 | 0      | 2 |
| 399 MMP2   | ENST00000219070 | p.K595N  | c.1785    | 0.0147924   | 6.079  | 1 |
| 399 TIMP2  | ENST00000262768 | p.D216N  | c.646     | 0.0147924   | 0      | 1 |
| 400 CENPA  | ENST00000335756 | p.A93T   | c.277     | 0.009712107 | 0      | 1 |
| 400 HJURP  | ENST00000411486 | p.F44L   | c.132     | 0.009712107 | 6.686  | 1 |
| 401 BCAR1  | ENST00000418647 | p.Y793C  | c.2378    | 0.019545767 | 5.677  | 1 |
| 401 SH2D3C | ENST00000314830 | p.P545L  | c.1634    | 0.019545767 | 0      | 1 |

|              |                 |         |             |             |        |   |
|--------------|-----------------|---------|-------------|-------------|--------|---|
| 402 SF3A1    | ENST00000215793 | p.T170M | c.509       | 0.18737495  | 0      | 1 |
| 402 SF3A3    | ENST00000373019 | p.F84L  | c.252       | 0.18737495  | 2.416  | 1 |
| 403 RPL17    | ENST00000579408 | p.D50Y  | c.148       | 2.86E-05    | 15.093 | 1 |
| 403 RPL3     | ENST00000216146 | p.K124T | c.371       | 2.86E-05    | 0      | 1 |
| 404 ASF1A    | ENST00000229595 | p.S59F  | c.176       | 0.008206598 | 0      | 1 |
| 404 HIRA     | ENST00000340170 | p.R453Q | c.1358      | 0.008206598 | 6.929  | 1 |
| 405 E2F1     | ENST00000343380 | p.E280Q | c.838       | 0.080772052 | 0      | 1 |
| 405 RB1      | ENST00000267163 | p.R857H | c.2570      | 0.080772052 | 3.63   | 1 |
| 406 ILK      | ENST00000420936 | p.H77N  | c.229       | 0.036004705 | 0      | 1 |
| 406 LIMS2    | ENST00000324938 | p.E83G  | c.248       | 0.023764807 | 5.413  | 1 |
| 406 LIMS2    | ENST00000324938 | p.F96V  | c.286       | 0.012828263 | 6.318  | 1 |
| 407 SMAD3    | ENST00000327367 | p.R420H | c.1259      | 0.022498927 | 0      | 1 |
| 407 SMAD4    | ENST00000342988 | p.A406T | c.1216      | 0.022498927 | 5.474  | 1 |
| 408 IL1B     | ENST00000263341 | p.L145F | c.433       | 0.014001203 | 0      | 1 |
| 408 IL1R1    | ENST00000233946 | p.E28K  | c.82        | 0.010052809 | 6.642  | 1 |
| 408 IL1R2    | ENST00000332549 | p.Q140H | c.420       | 0.004028263 | 7.97   | 1 |
| 409 ITGA2B   | ENST00000262407 | p.A728V | c.2183      | 1.01766454  | 0      | 1 |
| 409 ITGA2B   | ENST00000262407 | p.A728Y | c.2183_2182 | 1.01766454  | 0      | 1 |
| 409 ITGB3    | ENST00000559488 | p.S411Y | c.1232      | 0.03532908  | 5.823  | 1 |
| 410 KIT      | ENST00000288135 | p.I571K | c.1712      | 0.142793281 | 2.808  | 1 |
| 410 SOCS6    | ENST00000397942 | p.R476Q | c.1427      | 0.142793281 | 0      | 1 |
| 411 CNTN1    | ENST00000347616 | p.P233T | c.697       | 0.002614952 | 8.579  | 1 |
| 411 PTPRZ1   | ENST00000393386 | p.I66M  | c.198       | 0.002614952 | 0      | 1 |
| 412 CYP11A1  | ENST00000268053 | p.R466Q | c.1398_1397 | 0.024586326 | 5.346  | 1 |
| 412 FDX1     | ENST00000260270 | p.T109S | c.326       | 0.024586326 | 0      | 1 |
| 413 FST      | ENST00000256759 | p.E157G | c.470       | 0.008644511 | 6.854  | 1 |
| 413 INHBA    | ENST00000442711 | p.P342L | c.1025      | 0.008644511 | 0      | 1 |
| 414 ARHGEF11 | ENST00000368194 | p.E901K | c.2701      | 0.045689295 | 5.452  | 1 |
| 414 RHOA     | ENST00000418115 | p.R5W   | c.13        | 1.022844648 | 0      | 1 |
| 414 RHOA     | ENST00000418115 | p.R5Q   | c.14        | 1.022844648 | 0      | 1 |
| 415 ITGA5    | ENST00000293379 | p.R358W | c.1072      | 1.069830446 | 0      | 2 |
| 415 ITGB1    | ENST00000374956 | p.G387D | c.1160      | 0.139660892 | 3.84   | 1 |
| 416 FOXP3    | ENST00000557224 | p.R422W | c.1264      | 0.006679705 | 0      | 1 |
| 416 NFATC2   | ENST00000396009 | p.K664N | c.1992      | 0.006679705 | 7.226  | 1 |
| 417 RNF41    | ENST00000345093 | p.R213H | c.638       | 0.084553014 | 3.564  | 1 |
| 417 USP8     | ENST00000396444 | p.Q211E | c.631       | 0.084553014 | 0      | 1 |
| 418 F2       | ENST00000311907 | p.G499R | c.1495      | 0.059498619 | 4.071  | 1 |
| 418 F2R      | ENST00000319211 | p.D50N  | c.148       | 0.059498619 | 0      | 1 |
| 420 PLXNC1   | ENST00000258526 | p.A216T | c.646       | 0.003993861 | 7.968  | 1 |

|     |        |                 |                    |           |             |        |   |
|-----|--------|-----------------|--------------------|-----------|-------------|--------|---|
| 420 | SEMA7A | ENST00000261918 | p.E273G            | c.818     | 0.003993861 | 0      | 1 |
| 421 | CAB39L | ENST00000347776 | p.R141S            | c.421     | 1.002374764 | 9.718  | 1 |
| 421 | CAB39L | ENST00000347776 | p.R141H            | c.422     | 1.002374764 | 9.718  | 1 |
| 421 | STK24  | ENST00000376547 | p.A134T            | c.400     | 1.002374764 | 0      | 2 |
| 422 | MYLIP  | ENST00000356840 | p.M388T            | c.1163    | 0.003235042 | 8.272  | 1 |
| 422 | UBE2D1 | ENST00000373910 | p.K101N            | c.303     | 0.003235042 | 0      | 1 |
| 423 | DOCK2  | ENST00000256935 | p.R1449C           | c.4345    | 0.024231038 | 0      | 1 |
| 423 | RAC1   | ENST00000356142 | p.P34S             | c.100     | 0.024231038 | 5.367  | 1 |
| 424 | C3     | ENST00000245907 | p.E1032D           | c.3096    | 0.059750337 | 0      | 1 |
| 424 | CFH    | ENST00000367429 | p.E1175D           | c.3525    | 0.012391853 | 6.402  | 1 |
| 424 | CR2    | ENST00000367057 | p.T54A             | c.160     | 0.023147895 | 5.486  | 1 |
| 424 | CR2    | ENST00000367057 | p.R33Q             | c.98      | 0.026487001 | 5.287  | 1 |
| 425 | CASC3  | ENST00000264645 | p.R245H            | c.734     | 0.001414983 | 0      | 1 |
| 425 | EIF4A3 | ENST00000269349 | p.H158L            | c.473     | 0.001414983 | 9.465  | 1 |
| 426 | SKA2   | ENST00000330137 | p.S76T             | c.227     | 0.001821067 | 0      | 1 |
| 426 | SKA3   | ENST00000314759 | p.N69T             | c.206     | 0.001821067 | 9.101  | 1 |
| 427 | PRKAA2 | ENST00000371244 | p.R407Q            | c.1220    | 1.002061628 | 0      | 2 |
| 427 | PRKAB1 | ENST00000229328 | p.A241V            | c.722     | 0.004123257 | 8.922  | 1 |
| 428 | MMP10  | ENST00000279441 | p.G168R            | c.502     | 1.013480334 | 0      | 1 |
| 428 | MMP10  | ENST00000279441 | p.G168E            | c.503     | 1.013480334 | 0      | 1 |
| 428 | TIMP2  | ENST00000262768 | p.I66M             | c.198     | 0.026960667 | 6.213  | 1 |
| 429 | MYO5B  | ENST00000285039 | p.P1675H           | c.5024    | 0.01159784  | 0      | 1 |
| 429 | RAB11A | ENST00000261890 | p.R129H            | c.386     | 0.01159784  | 6.43   | 1 |
| 430 | ITGAX  | ENST00000562522 | p.R520H            | c.1559    | 1.00836163  | 0      | 2 |
| 430 | ITGB2  | ENST00000397850 | p.D300H            | c.898     | 0.016723261 | 6.902  | 1 |
| 431 | FSTL3  | ENST00000166139 | p.C222Y            | c.665     | 0.00411184  | 7.926  | 1 |
| 431 | INHBA  | ENST00000442711 | p.W338R            | c.1012    | 0.00411184  | 0      | 1 |
| 432 | TNNI3  | ENST00000344887 | p.H101Y            | c.301     | 0.003184684 | 18.793 | 1 |
| 432 | TNNI3  | ENST00000344887 | p.R103H            | c.308     | 1.000899577 | 0      | 1 |
| 432 | TNNI3  | ENST00000344887 | p.R103L            | c.308     | 1.000899577 | 0      | 1 |
| 432 | TNNT2  | ENST00000458432 | p.K219in_frame_del | c.658_656 | 0.004249938 | 10.122 | 1 |
| 433 | CD180  | ENST00000256447 | p.N41H             | c.121     | 0.00211372  | 0      | 1 |
| 433 | LY86   | ENST00000230568 | p.W27G             | c.79      | 0.00211372  | 8.886  | 1 |
| 434 | SNF8   | ENST00000502492 | p.M36L             | c.106     | 0.011882647 | 0      | 1 |
| 434 | VPS36  | ENST00000378060 | p.E193A            | c.578     | 0.011882647 | 6.395  | 1 |
| 435 | ASF1A  | ENST00000229595 | p.V92I             | c.274     | 0.056250121 | 4.152  | 1 |
| 435 | TAF1   | ENST00000449580 | p.D1416E           | c.4248    | 0.056250121 | 0      | 1 |
| 436 | SNRPB  | ENST00000438552 | p.S79L             | c.236     | 0.029056404 | 5.105  | 1 |
| 436 | SNRPD1 | ENST00000300413 | p.R61Q             | c.182     | 0.029056404 | 0      | 1 |

|     |          |                 |                    |             |             |        |   |
|-----|----------|-----------------|--------------------|-------------|-------------|--------|---|
| 437 | ITGAX    | ENST00000562522 | p.S930I            | c.2789      | 0.013248749 | 0      | 1 |
| 437 | ITGB2    | ENST00000397850 | p.G617S            | c.1849      | 0.013248749 | 6.238  | 1 |
| 438 | MAX      | ENST00000358664 | p.R60Q             | c.179       | 5.003153129 | 0      | 5 |
| 438 | MAX      | ENST00000358664 | p.R60in_frame_del  | c.180_178   | 5.003153129 | 0      | 1 |
| 438 | MYC      | ENST00000377970 | p.E384K            | c.1150      | 0.018918775 | 8.309  | 1 |
| 439 | COL4A1   | ENST00000375820 | p.R1516Q           | c.4547      | 0.044687031 | 0      | 1 |
| 439 | COL4A2   | ENST00000360467 | p.G1632E           | c.4895      | 0.044687031 | 4.484  | 1 |
| 440 | FST      | ENST00000256759 | p.V44I             | c.130       | 0.030479858 | 0      | 1 |
| 440 | INHBA    | ENST00000442711 | p.G311D            | c.932       | 0.030479858 | 5.036  | 1 |
| 441 | GINS2    | ENST00000253462 | p.T172M            | c.515       | 0.080436828 | 0      | 1 |
| 441 | GINS3    | ENST00000426538 | p.P15S             | c.43        | 0.080436828 | 3.636  | 1 |
| 442 | CCNT1    | ENST00000261900 | p.F146C            | c.437       | 0.015335298 | 0      | 1 |
| 442 | CDK9     | ENST00000373265 | p.P177S            | c.529       | 0.015335298 | 6.027  | 1 |
| 443 | ARRDC3   | ENST00000265138 | p.Y349C            | c.1046      | 0.01076879  | 0      | 1 |
| 443 | NEDD4    | ENST00000508342 | p.W846F            | c.2538_2537 | 0.01076879  | 6.537  | 1 |
| 444 | CD80     | ENST00000264246 | p.K70N             | c.210       | 0.027318082 | 5.194  | 1 |
| 444 | CTLA4    | ENST00000302823 | p.L141P            | c.422       | 0.027318082 | 0      | 1 |
| 445 | PKIA     | ENST00000396418 | p.R16T             | c.47        | 0.090747392 | 3.462  | 1 |
| 445 | PRKACA   | ENST00000308677 | p.P244L            | c.731       | 0.090747392 | 0      | 1 |
| 446 | DDB1     | ENST00000301764 | p.R188Q            | c.563       | 1.014150531 | 0      | 2 |
| 446 | DDB2     | ENST00000256996 | p.E33Q             | c.97        | 0.028301062 | 6.143  | 1 |
| 447 | AFF4     | ENST00000265343 | p.133in_frame_insS | c.400_399   | 0.00042126  | 0      | 1 |
| 447 | CDK9     | ENST00000373265 | p.D422A            | c.1265      | 0.00042126  | 11.213 | 1 |
| 448 | RBP4     | ENST00000371464 | p.G118E            | c.353       | 0.009156424 | 0      | 1 |
| 448 | TTR      | ENST00000237014 | p.S120Y            | c.359       | 0.009156424 | 6.771  | 1 |
| 449 | NAE1     | ENST00000359087 | p.A337T            | c.1009      | 0.133230842 | 2.908  | 1 |
| 449 | UBA3     | ENST00000361055 | p.R244W            | c.730       | 0.133230842 | 0      | 1 |
| 450 | COL4A1   | ENST00000375820 | p.K1643E           | c.4927      | 0.010783729 | 6.535  | 1 |
| 450 | COL4A2   | ENST00000360467 | p.P1585T           | c.4753      | 0.010783729 | 0      | 1 |
| 451 | KIT      | ENST00000288135 | p.D72E             | c.216       | 0.005966084 | 0      | 1 |
| 451 | KITLG    | ENST00000228280 | p.K128N            | c.384       | 0.005966084 | 7.389  | 1 |
| 452 | ALB      | ENST00000295897 | p.E301K            | c.901       | 0.138312169 | 2.854  | 1 |
| 452 | B2M      | ENST00000544417 | p.E94K             | c.280       | 0.138312169 | 0      | 1 |
| 453 | NFKB1    | ENST00000226574 | p.R57C             | c.169       | 0.198196034 | 2.335  | 1 |
| 453 | TXN      | ENST00000374517 | p.T30M             | c.89        | 0.198196034 | 0      | 1 |
| 454 | F3       | ENST00000334047 | p.E127D            | c.381       | 0.038154579 | 0      | 1 |
| 454 | F7       | ENST00000375581 | p.Q368K            | c.1102      | 0.038154579 | 4.712  | 1 |
| 455 | C11orf30 | ENST00000524767 | p.R18I             | c.53        | 2.006125316 | 0      | 3 |
| 455 | CBX1     | ENST00000393408 | p.S141F            | c.422       | 0.018375948 | 7.351  | 1 |

|     |        |                 |          |           |             |        |   |
|-----|--------|-----------------|----------|-----------|-------------|--------|---|
| 456 | IL6    | ENST00000420258 | p.E191K  | c.571     | 0.010019817 | 0      | 1 |
| 456 | IL6ST  | ENST00000336909 | p.K256Q  | c.766     | 0.010019817 | 6.641  | 1 |
| 457 | GCC2   | ENST00000309863 | p.R1495P | c.4484    | 9.50E-05    | 13.361 | 1 |
| 457 | RAB6A  | ENST00000310653 | p.A70V   | c.209     | 9.50E-05    | 0      | 1 |
| 458 | C5     | ENST00000223642 | p.K1200N | c.3600    | 0.020206738 | 12.866 | 1 |
| 458 | C5     | ENST00000223642 | p.R1206C | c.3616    | 2.006897519 | 0      | 3 |
| 458 | C6     | ENST00000263413 | p.T674N  | c.2021    | 0.040095584 | 7.208  | 1 |
| 459 | AGT    | ENST00000366667 | p.R116C  | c.346     | 0.066109435 | 0      | 1 |
| 459 | REN    | ENST00000272190 | p.A182V  | c.545     | 0.066109435 | 3.919  | 1 |
| 460 | RPS14  | ENST00000312037 | p.L76F   | c.228     | 0.000169785 | 12.524 | 1 |
| 460 | RPS5   | ENST00000598495 | p.N224S  | c.671     | 0.000169785 | 0      | 1 |
| 461 | IFNAR1 | ENST00000270139 | p.N507H  | c.1519    | 0.048127323 | 4.377  | 1 |
| 461 | TYK2   | ENST00000525621 | p.G535D  | c.1604    | 0.048127323 | 0      | 1 |
| 462 | IL17A  | ENST00000340057 | p.L76F   | c.226     | 0.007406461 | 7.077  | 1 |
| 462 | IL17RA | ENST00000319363 | p.N179H  | c.535     | 0.007406461 | 0      | 1 |
| 463 | ERCC1  | ENST00000013807 | p.A220T  | c.658     | 0.228774792 | 2.128  | 1 |
| 463 | ERCC4  | ENST00000311895 | p.T885M  | c.2654    | 0.228774792 | 0      | 1 |
| 464 | CALCRL | ENST00000392370 | p.F92L   | c.274     | 0.006977858 | 7.163  | 1 |
| 464 | RAMP1  | ENST00000254661 | p.V111M  | c.331     | 0.006977858 | 0      | 1 |
| 465 | CHRNA4 | ENST00000370263 | p.G207N  | c.620_619 | 0.014338123 | 6.124  | 1 |
| 465 | CHRN2  | ENST00000368476 | p.K156N  | c.468     | 0.014338123 | 0      | 1 |
| 466 | LCMT1  | ENST00000399069 | p.E304K  | c.910     | 0.154320326 | 0      | 1 |
| 466 | PPP2CA | ENST00000481195 | p.Y265N  | c.793     | 0.154320326 | 2.696  | 1 |
| 467 | IGF1   | ENST00000307046 | p.F71C   | c.212     | 0.073658713 | 0      | 1 |
| 467 | IGFBP4 | ENST00000269593 | p.H193Y  | c.577     | 0.073658713 | 3.763  | 1 |
| 468 | E2F1   | ENST00000343380 | p.R252C  | c.754     | 0.002586111 | 0      | 1 |
| 468 | TFDP1  | ENST00000375370 | p.R302Q  | c.905     | 0.002586111 | 8.595  | 1 |
| 469 | PRM1   | ENST00000312511 | p.S29N   | c.86      | 0.012516717 | 0      | 1 |
| 469 | PRM2   | ENST00000435245 | p.R80C   | c.238     | 0.012516717 | 6.32   | 1 |
| 470 | KPNB1  | ENST00000290158 | p.G391V  | c.1172    | 0.002861525 | 0      | 1 |
| 470 | SNAI1  | ENST00000244050 | p.R264H  | c.791     | 0.002861525 | 8.449  | 1 |
| 471 | RPL21  | ENST00000326092 | p.V25A   | c.74      | 5.54E-05    | 14.14  | 1 |
| 471 | RPL5   | ENST00000370321 | p.G71E   | c.212     | 5.54E-05    | 0      | 1 |
| 472 | GRIN2A | ENST00000396573 | p.E1461K | c.4381    | 0.002104948 | 8.892  | 1 |
| 472 | PTPN4  | ENST00000263708 | p.D580Y  | c.1738    | 0.002104948 | 0      | 1 |
| 473 | CNOT1  | ENST00000317147 | p.R1308H | c.3923    | 0.009017855 | 7.793  | 1 |
| 473 | CNOT7  | ENST00000361272 | p.R28C   | c.82      | 1.004508927 | 0      | 2 |
| 474 | CALM1  | ENST00000447653 | p.L71F   | c.213     | 0.098892163 | 3.338  | 1 |
| 474 | DAPK1  | ENST00000469640 | p.R53W   | c.157     | 0.098892163 | 0      | 1 |

|               |                 |          |        |             |       |   |
|---------------|-----------------|----------|--------|-------------|-------|---|
| 475 IL2       | ENST00000226730 | p.V111L  | c.331  | 1.054978067 | 0     | 1 |
| 475 IL2       | ENST00000226730 | p.V111A  | c.332  | 1.054978067 | 0     | 1 |
| 475 IL2RB     | ENST00000216223 | p.P65L   | c.194  | 0.109956134 | 4.185 | 1 |
| 476 S100A13   | ENST00000368699 | p.H48Y   | c.142  | 0.211393072 | 0     | 1 |
| 476 SYT1      | ENST00000393240 | p.A171T  | c.511  | 0.211393072 | 2.242 | 1 |
| 477 GLYR1     | ENST00000321919 | p.H219Y  | c.655  | 0.007657027 | 7.029 | 1 |
| 477 KDM1B     | ENST00000388870 | p.A566V  | c.1697 | 0.007657027 | 0     | 1 |
| 478 CCND1     | ENST00000227507 | p.E135D  | c.405  | 0.077535456 | 0     | 1 |
| 478 CDK4      | ENST00000257904 | p.R82Q   | c.245  | 0.077535456 | 3.689 | 1 |
| 479 VPS16     | ENST00000380445 | p.N663H  | c.1987 | 0.001805983 | 9.113 | 1 |
| 479 VPS33A    | ENST00000267199 | p.P455L  | c.1364 | 0.001805983 | 0     | 1 |
| 480 S100A8    | ENST00000368733 | p.N10K   | c.30   | 0.163572259 | 2.612 | 1 |
| 480 S100A9    | ENST00000368738 | p.S90F   | c.269  | 0.163572259 | 0     | 1 |
| 481 LGR4      | ENST00000379214 | p.R156W  | c.466  | 1.004706923 | 0     | 2 |
| 481 RSPO1     | ENST00000401068 | p.K113T  | c.338  | 0.009413846 | 7.731 | 1 |
| 482 HGF       | ENST00000222390 | p.R539Q  | c.1616 | 0.022328033 | 0     | 1 |
| 482 MET       | ENST00000318493 | p.D414N  | c.1240 | 0.022328033 | 5.485 | 1 |
| 483 ITGAX     | ENST00000562522 | p.R830H  | c.2489 | 0.017003788 | 0     | 1 |
| 483 ITGB2     | ENST00000397850 | p.R543C  | c.1627 | 0.017003788 | 5.878 | 1 |
| 484 BRK1      | ENST00000256463 | p.R19W   | c.55   | 0.015399208 | 0     | 1 |
| 484 WASF1     | ENST00000392588 | p.T30I   | c.89   | 0.015399208 | 6.021 | 1 |
| 485 PDIA3     | ENST00000300289 | p.H408R  | c.1223 | 0.00401607  | 0     | 1 |
| 485 TAPBP     | ENST00000456592 | p.T255S  | c.763  | 0.00401607  | 7.96  | 1 |
| 486 RAB11A    | ENST00000261890 | p.A79E   | c.236  | 0.010949433 | 0     | 1 |
| 486 RAB11FIP3 | ENST00000457159 | p.V788M  | c.2362 | 0.010949433 | 6.513 | 1 |
| 487 C3        | ENST00000245907 | p.S1008L | c.3023 | 0.09964906  | 3.327 | 1 |
| 487 CFHR1     | ENST00000320493 | p.R309H  | c.926  | 0.09964906  | 0     | 1 |



**Supplementary Table 5. Cluster closeness and number of mutations from oncogene clusters**

---

| <b>Cluster Closeness</b> | <b>Mutations</b> | <b>Genes</b> |
|--------------------------|------------------|--------------|
| 1728.282                 | 252              | KRAS         |
| 1001.823                 | 338              | BRAF         |
| 907.763                  | 180              | IDH1         |
| 685.906                  | 174              | PIK3CA       |
| 393.835                  | 83               | PIK3CA       |
| 176.577                  | 54               | EGFR         |
| 148.783                  | 37               | HRAS         |
| 119.675                  | 42               | PIK3CA       |
| 77.81                    | 37               | PIK3CA       |
| 76.811                   | 27               | IDH2         |
| 61.101                   | 29               | PIK3CA       |
| 48.195                   | 19               | FLT3         |
| 35.526                   | 28               | PPP2R1A      |
| 31.613                   | 25               | EGFR         |
| 23.878                   | 24               | DNMT3A       |
| 22.952                   | 15               | MAP2K1       |
| 17.481                   | 17               | PIK3CA       |
| 16.216                   | 13               | ERBB2        |
| 10.283                   | 10               | PTPN11       |
| 9.386                    | 8                | KIT          |
| 8.931                    | 8                | SPOP         |
| 6.032                    | 4                | FLT3         |
| 5.935                    | 7                | FGFR2        |
| 4.996                    | 10               | DNMT3A       |
| 4.382                    | 4                | EZH2         |
| 4.342                    | 5                | SKP2         |
| 4.092                    | 6                | SKP2         |
| 4.018                    | 4                | DNMT3A       |
| 3.763                    | 4                | FLT3         |
| 3.161                    | 8                | EGFR         |
| 2.725                    | 5                | FLT3         |
| 2.399                    | 6                | SPOP         |
| 2.338                    | 4                | ABL1         |
| 2.332                    | 4                | MET          |
| 2.158                    | 3                | RET          |
| 2.157                    | 3                | EGFR         |
| 2.072                    | 4                | MET          |
| 2.059                    | 4                | DNMT1        |
| 2.043                    | 3                | DNMT3A       |

|       |   |         |
|-------|---|---------|
| 2.035 | 3 | IDH1    |
| 1.675 | 5 | EGFR    |
| 1.632 | 4 | MET     |
| 1.546 | 3 | ABL1    |
| 1.345 | 4 | FGFR2   |
| 1.345 | 4 | CTNNB1  |
| 1.316 | 4 | PTPN11  |
| 1.31  | 4 | U2AF1   |
| 1.3   | 5 | MET     |
| 1.299 | 4 | JAK2    |
| 1.2   | 5 | KIT     |
| 1.085 | 3 | FGFR2   |
| 1.028 | 2 | H3F3A   |
| 1.024 | 3 | ERBB2   |
| 1.022 | 3 | FLT3    |
| 0.547 | 2 | NFE2L2  |
| 0.518 | 3 | KRAS    |
| 0.409 | 3 | EGFR    |
| 0.381 | 2 | KIT     |
| 0.372 | 3 | CSF1R   |
| 0.369 | 2 | PPP2R1A |
| 0.367 | 3 | CBL     |
| 0.359 | 4 | JAK1    |
| 0.351 | 3 | ABL1    |
| 0.339 | 3 | AR      |
| 0.302 | 5 | JAK1    |
| 0.3   | 3 | CTNNB1  |
| 0.265 | 3 | SPOP    |
| 0.256 | 3 | PPP2R1A |
| 0.25  | 3 | DNMT1   |
| 0.235 | 2 | PPP2R1A |
| 0.228 | 2 | SPOP    |
| 0.213 | 3 | DNMT3A  |
| 0.212 | 2 | MET     |
| 0.205 | 2 | ALK     |
| 0.195 | 2 | FGFR2   |
| 0.185 | 2 | RET     |
| 0.176 | 3 | AKT1    |
| 0.17  | 3 | DNMT3A  |
| 0.169 | 3 | CSF1R   |
| 0.153 | 3 | EGFR    |

|       |   |         |
|-------|---|---------|
| 0.132 | 2 | PPP2R1A |
| 0.126 | 2 | KIT     |
| 0.123 | 2 | KIT     |
| 0.119 | 3 | TSHR    |
| 0.114 | 2 | DNMT1   |
| 0.104 | 3 | DNMT3A  |
| 0.091 | 3 | PIK3CA  |
| 0.084 | 3 | FGFR2   |
| 0.083 | 2 | CSF1R   |
| 0.08  | 2 | RET     |
| 0.078 | 3 | FGFR2   |
| 0.07  | 2 | IDH2    |
| 0.07  | 2 | KRAS    |
| 0.062 | 2 | CSF1R   |
| 0.059 | 3 | JAK3    |
| 0.054 | 2 | ALK     |
| 0.054 | 3 | EGFR    |
| 0.054 | 2 | JAK2    |
| 0.049 | 3 | DNMT3A  |
| 0.047 | 3 | KIT     |
| 0.045 | 2 | RET     |
| 0.044 | 3 | CTNNB1  |
| 0.043 | 3 | KIT     |
| 0.042 | 2 | MDM2    |
| 0.039 | 2 | CBL     |
| 0.036 | 2 | ALK     |
| 0.035 | 2 | ALK     |
| 0.034 | 2 | SPOP    |
| 0.034 | 2 | MET     |
| 0.033 | 2 | PIK3CA  |
| 0.031 | 2 | EGFR    |
| 0.029 | 2 | FLT3    |
| 0.028 | 2 | EGFR    |
| 0.024 | 2 | CSF1R   |
| 0.024 | 2 | ERBB2   |
| 0.022 | 2 | MAP2K1  |
| 0.021 | 2 | PPP2R1A |
| 0.021 | 2 | JAK1    |
| 0.019 | 2 | BRAF    |
| 0.019 | 2 | MET     |
| 0.019 | 2 | JAK3    |

|       |   |        |
|-------|---|--------|
| 0.017 | 2 | FLT3   |
| 0.015 | 2 | ERBB2  |
| 0.014 | 2 | CTNNB1 |

**Supplementary Table 6. Cluster closeness and number of mutations from tumor suppressor clusters**

---

| <b>Cluster Closeness</b> | <b>Mutations</b> | <b>Genes</b> |
|--------------------------|------------------|--------------|
| 5311.107                 | 773              | TP53         |
| 371.341                  | 105              | PTEN         |
| 201.456                  | 62               | FBXW7        |
| 114.293                  | 24               | SMAD4        |
| 104.851                  | 40               | CDKN2A       |
| 74.467                   | 40               | VHL          |
| 26.46                    | 13               | PIK3R1       |
| 20.869                   | 16               | EP300        |
| 15.178                   | 10               | RUNX1        |
| 8.577                    | 13               | CASP8        |
| 8.371                    | 7                | FBXW7        |
| 8.222                    | 10               | PBRM1        |
| 7.651                    | 9                | PIK3R1       |
| 6.908                    | 8                | SETD2        |
| 5.95                     | 8                | SETD2        |
| 3.05                     | 4                | MAP2K4       |
| 2.825                    | 6                | SMAD2        |
| 2.739                    | 10               | B2M          |
| 2.684                    | 7                | MAP2K4       |
| 2.465                    | 4                | STK11        |
| 2.4                      | 3                | SETD2        |
| 2.165                    | 3                | PTEN         |
| 2.119                    | 3                | PAX5         |
| 2.067                    | 3                | RB1          |
| 2.04                     | 3                | MEN1         |
| 2.036                    | 3                | MSH6         |
| 1.843                    | 5                | CDH1         |
| 1.554                    | 3                | FBXW7        |
| 1.428                    | 4                | MAP2K4       |
| 1.373                    | 6                | PBRM1        |
| 1.328                    | 3                | NOTCH1       |
| 1.042                    | 3                | NF1          |
| 1.025                    | 5                | CDKN2C       |
| 0.954                    | 7                | PIK3R1       |
| 0.658                    | 2                | CREBBP       |
| 0.553                    | 3                | SMARCA4      |
| 0.481                    | 5                | MSH2         |
| 0.479                    | 2                | ATRX         |
| 0.371                    | 3                | SMAD2        |
| 0.359                    | 3                | NOTCH1       |
| 0.321                    | 3                | CDH1         |
| 0.316                    | 2                | KDM6A        |
| 0.291                    | 3                | HNF1A        |
| 0.267                    | 3                | SMAD4        |

|       |   |        |
|-------|---|--------|
| 0.264 | 2 | MSH6   |
| 0.259 | 3 | RB1    |
| 0.253 | 3 | NOTCH1 |
| 0.249 | 2 | CASP8  |
| 0.224 | 2 | CDKN2A |
| 0.214 | 3 | PHF6   |
| 0.191 | 3 | NOTCH1 |
| 0.174 | 3 | MLH1   |
| 0.165 | 2 | B2M    |
| 0.165 | 2 | RB1    |
| 0.147 | 3 | GATA3  |
| 0.139 | 4 | MSH6   |
| 0.135 | 2 | SMAD4  |
| 0.133 | 2 | CASP8  |
| 0.132 | 2 | NF2    |
| 0.113 | 2 | NOTCH1 |
| 0.103 | 2 | ARID1B |
| 0.1   | 3 | PHF6   |
| 0.099 | 2 | PBRM1  |
| 0.091 | 2 | CDKN2A |
| 0.075 | 2 | SETD2  |
| 0.067 | 3 | NF1    |
| 0.058 | 2 | MSH6   |
| 0.046 | 2 | APC    |
| 0.037 | 2 | EP300  |
| 0.034 | 2 | EP300  |
| 0.032 | 2 | NF1    |
| 0.03  | 2 | RB1    |
| 0.029 | 5 | RNF43  |
| 0.027 | 2 | MEN1   |
| 0.023 | 2 | MSH6   |
| 0.019 | 2 | RB1    |
| 0.018 | 2 | NOTCH1 |
| 0.018 | 2 | APC    |
| 0.017 | 2 | MSH6   |
| 0.017 | 2 | RB1    |
| 0.016 | 2 | MSH6   |
| 0.016 | 2 | MAP2K4 |
| 0.016 | 2 | MEN1   |
| 0.015 | 2 | NPM1   |
| 0.014 | 2 | NF2    |
| 0.013 | 2 | NF2    |
| 0.01  | 2 | NPM1   |
| 0.008 | 2 | NPM1   |
| 0.006 | 3 | PAX5   |

Supplementary Table 7. Oncogene intra-molecular clusters with protein domain annotation

| Cluster ID | Gene    | Transcript (Ensembl74) | HGVS Protein Annotation | HGVS Coding Position | Pfam Protein Domain                                                    | Cloneness   | Centrality | Geodesic From Centroid | No. Patient Samples |
|------------|---------|------------------------|-------------------------|----------------------|------------------------------------------------------------------------|-------------|------------|------------------------|---------------------|
| 90         | PPP2R1A | ENST00000322088        | p.R105Q                 | c.314                | Protein phosphatase 2 regulatory subunits                              | 0.19562623  |            | 9.474                  | 1                   |
| 90         | PPP2R1A | ENST00000322088        | p.S143F                 | c.428                | Protein phosphatase 2 regulatory subunits                              | 0.245795419 |            | 7.146                  | 1                   |
| 90         | PPP2R1A | ENST00000322088        | p.R144C                 | c.430                | Protein phosphatase 2 regulatory subunits                              | 2.017673887 |            | 3.954                  | 1                   |
| 90         | PPP2R1A | ENST00000322088        | p.R144H                 | c.431                | Protein phosphatase 2 regulatory subunits                              | 2.017673887 |            | 3.954                  | 1                   |
| 90         | PPP2R1A | ENST00000322088        | p.T145P                 | c.433                | Protein phosphatase 2 regulatory subunits                              | 0.460030453 |            | 6.313                  | 1                   |
| 90         | PPP2R1A | ENST00000322088        | p.L173M                 | c.517                | Protein phosphatase 2 regulatory subunits                              | 0.366856295 |            | 7.5                    | 1                   |
| 90         | PPP2R1A | ENST00000322088        | p.P179R                 | c.536                | Protein phosphatase 2 regulatory subunits                              | 7.298162631 |            | 0                      | 8                   |
| 90         | PPP2R1A | ENST00000322088        | p.R183W                 | c.547                | Protein phosphatase 2 regulatory subunits                              | 6.362422002 |            | 7.405                  | 5                   |
| 90         | PPP2R1A | ENST00000322088        | p.R183Q                 | c.548                | Protein phosphatase 2 regulatory subunits                              | 6.362422002 |            | 7.405                  | 2                   |
| 90         | PPP2R1A | ENST00000322088        | p.D215H                 | c.643                | Protein phosphatase 2 regulatory subunits                              | 0.228419611 |            | 5.689                  | 1                   |
| 90         | PPP2R1A | ENST00000322088        | p.V220M                 | c.658                | Protein phosphatase 2 regulatory subunits                              | 1.497369249 |            | 3.965                  | 1                   |
| 90         | PPP2R1A | ENST00000322088        | p.R258C                 | c.772                | Protein phosphatase 2 regulatory subunits                              | 4.236709803 |            | 8.132                  | 2                   |
| 90         | PPP2R1A | ENST00000322088        | p.R258H                 | c.773                | Protein phosphatase 2 regulatory subunits                              | 4.236709803 |            | 8.132                  | 3                   |
| 102        | PTPN11  | ENST00000351677        | p.V428M                 | c.1282               | Protein tyrosine phosphatases, non-receptor type SH2 domain containing | 0.094049056 |            | 6.727                  | 1                   |
| 102        | PTPN11  | ENST00000351677        | p.I463L                 | c.1387               | Protein tyrosine phosphatases, non-receptor type SH2 domain containing | 0.178566923 |            | 4.931                  | 1                   |
| 102        | PTPN11  | ENST00000351677        | p.T468M                 | c.1403               | Protein tyrosine phosphatases, non-receptor type SH2 domain containing | 3.319684691 |            | 3.722                  | 4                   |
| 102        | PTPN11  | ENST00000351677        | p.Q510L                 | c.1529               | Protein tyrosine phosphatases, non-receptor type SH2 domain containing | 3.345349104 |            | 0                      | 2                   |
| 102        | PTPN11  | ENST00000351677        | p.Q510H                 | c.1530               | Protein tyrosine phosphatases, non-receptor type SH2 domain containing | 3.345349104 |            | 0                      | 2                   |
| 137        | EGFR    | ENST00000275493        | p.F712L                 | c.2136               | Receptor Tyrosine Kinases                                              | 0.449520158 |            | 9.933                  | 1                   |
| 137        | EGFR    | ENST00000275493        | p.G721V                 | c.2162               | Receptor Tyrosine Kinases                                              | 0.379436077 |            | 6.501                  | 1                   |
| 137        | EGFR    | ENST00000275493        | p.LRE747in_frame_del    | c.2236_2244          | Receptor Tyrosine Kinases                                              | 1.485753755 |            | 3.391                  | 1                   |
| 137        | EGFR    | ENST00000275493        | p.V769L                 | c.2305               | Receptor Tyrosine Kinases                                              | 0.590964287 |            | 5.484                  | 1                   |
| 137        | EGFR    | ENST00000275493        | p.I789M                 | c.2367               | Receptor Tyrosine Kinases                                              | 0.607598771 |            | 8.024                  | 1                   |
| 137        | EGFR    | ENST00000275493        | p.T790M                 | c.2369               | Receptor Tyrosine Kinases                                              | 1.13102416  |            | 7.275                  | 1                   |
| 137        | EGFR    | ENST00000275493        | p.R831H                 | c.2492               | Receptor Tyrosine Kinases                                              | 1.426356714 |            | 8.933                  | 1                   |
| 137        | EGFR    | ENST00000275493        | p.R832C                 | c.2494               | Receptor Tyrosine Kinases                                              | 1.804391348 |            | 9.841                  | 1                   |
| 137        | EGFR    | ENST00000275493        | p.R832H                 | c.2495               | Receptor Tyrosine Kinases                                              | 1.804391348 |            | 9.841                  | 1                   |
| 137        | EGFR    | ENST00000275493        | p.L833V                 | c.2497               | Receptor Tyrosine Kinases                                              | 1.940841816 |            | 5.541                  | 1                   |
| 137        | EGFR    | ENST00000275493        | p.L833F                 | c.2499               | Receptor Tyrosine Kinases                                              | 1.940841816 |            | 5.541                  | 1                   |
| 137        | EGFR    | ENST00000275493        | p.A839V                 | c.2516               | Receptor Tyrosine Kinases                                              | 0.751626111 |            | 9.836                  | 1                   |
| 137        | EGFR    | ENST00000275493        | p.L858R                 | c.2573               | Receptor Tyrosine Kinases                                              | 8.219600976 |            | 0                      | 9                   |
| 137        | EGFR    | ENST00000275493        | p.L861Q                 | c.2582               | Receptor Tyrosine Kinases                                              | 4.540138193 |            | 6.998                  | 3                   |
| 137        | EGFR    | ENST00000275493        | p.L861R                 | c.2582               | Receptor Tyrosine Kinases                                              | 4.540138193 |            | 6.998                  | 1                   |
| 141        | H3F3A   | ENST00000366813        | p.R130H                 | c.389                | Histones                                                               | 1.027853453 |            | 0                      | 2                   |
| 155        | MET     | ENST00000318493        | p.L296P                 | c.887                | Receptor Tyrosine Kinases                                              | 0.284801037 |            | 6.961                  | 1                   |
| 155        | MET     | ENST00000318493        | p.V378I                 | c.1132               | Receptor Tyrosine Kinases                                              | 0.015810206 |            | 6.983                  | 1                   |
| 155        | MET     | ENST00000318493        | p.R412C                 | c.1234               | Receptor Tyrosine Kinases                                              | 1.015931677 |            | 0                      | 1                   |
| 155        | MET     | ENST00000318493        | p.R412G                 | c.1234               | Receptor Tyrosine Kinases                                              | 1.015931677 |            | 0                      | 1                   |
| 156        | IDH1    | ENST00000415913        | p.Y235C                 | c.704                | Unclassified                                                           | 1.008692579 |            | 0                      | 1                   |
| 156        | IDH1    | ENST00000415913        | p.Y235N                 | c.703                | Unclassified                                                           | 1.008692579 |            | 0                      | 1                   |
| 156        | IDH1    | ENST00000415913        | p.E190K                 | c.568                | Unclassified                                                           | 0.017385158 |            | 6.846                  | 1                   |
| 164        | PIK3CA  | ENST00000263967        | p.D538N                 | c.1612               | Phosphatidylinositol 3-kinase subunits                                 | 0.198044788 |            | 9.221                  | 1                   |
| 164        | PIK3CA  | ENST00000263967        | p.E542K                 | c.1624               | Phosphatidylinositol 3-kinase subunits                                 | 78.03891932 |            | 0                      | 73                  |
| 164        | PIK3CA  | ENST00000263967        | p.E542Q                 | c.1624               | Phosphatidylinositol 3-kinase subunits                                 | 78.03891932 |            | 0                      | 1                   |
| 164        | PIK3CA  | ENST00000263967        | p.E542A                 | c.1625               | Phosphatidylinositol 3-kinase subunits                                 | 78.03891932 |            | 0                      | 2                   |
| 164        | PIK3CA  | ENST00000263967        | p.E542G                 | c.1625               | Phosphatidylinositol 3-kinase subunits                                 | 78.03891932 |            | 0                      | 1                   |
| 164        | PIK3CA  | ENST00000263967        | p.E542V                 | c.1625               | Phosphatidylinositol 3-kinase subunits                                 | 78.03891932 |            | 0                      | 2                   |
| 164        | PIK3CA  | ENST00000263967        | p.R992P                 | c.2975               | Phosphatidylinositol 3-kinase subunits                                 | 0.172004598 |            | 9.836                  | 1                   |
| 164        | PIK3CA  | ENST00000263967        | p.F1016C                | c.3047               | Phosphatidylinositol 3-kinase subunits                                 | 1.067261781 |            | 6.706                  | 1                   |
| 164        | PIK3CA  | ENST00000263967        | p.D1029H                | c.3085               | Phosphatidylinositol 3-kinase subunits                                 | 2.203357558 |            | 5.234                  | 1                   |
| 194        | EGFR    | ENST00000275493        | p.L38V                  | c.112                | Receptor Tyrosine Kinases                                              | 0.051085433 |            | 6.568                  | 1                   |
| 194        | EGFR    | ENST00000275493        | p.E114K                 | c.340                | Receptor Tyrosine Kinases                                              | 2.135812001 |            | 0                      | 3                   |
| 194        | EGFR    | ENST00000275493        | p.S116F                 | c.347                | Receptor Tyrosine Kinases                                              | 0.060308267 |            | 9.387                  | 1                   |
| 194        | EGFR    | ENST00000275493        | p.V148M                 | c.442                | Receptor Tyrosine Kinases                                              | 0.190138688 |            | 9.449                  | 1                   |
| 194        | EGFR    | ENST00000275493        | p.R149W                 | c.445                | Receptor Tyrosine Kinases                                              | 0.457076182 |            | 3.161                  | 1                   |

|     |        |                 |                          |             |                                                                              |             |       |     |
|-----|--------|-----------------|--------------------------|-------------|------------------------------------------------------------------------------|-------------|-------|-----|
| 194 | EGFR   | ENST00000275493 | p.M178I                  | c.534       | Receptor Tyrosine Kinases                                                    | 0.266707117 | 6.567 | 1   |
| 219 | ALK    | ENST00000389048 | p.K1352N                 | c.4056      | CD molecules Receptor Tyrosine Kinases                                       | 0.026904662 | 5.216 | 1   |
| 219 | ALK    | ENST00000389048 | p.S1324F                 | c.3971      | CD molecules Receptor Tyrosine Kinases                                       | 0.026904662 | 0     | 1   |
| 245 | FLT3   | ENST00000380982 | p.L520I                  | c.1558      | CD molecules Immunoglobulin-like domain containing Receptor Tyrosine Kinases | 1.118501514 | 0     | 1   |
| 245 | FLT3   | ENST00000380982 | p.L520V                  | c.1558      | CD molecules Immunoglobulin-like domain containing Receptor Tyrosine Kinases | 1.118501514 | 0     | 1   |
| 245 | FLT3   | ENST00000380982 | p.N518D                  | c.1552      | CD molecules Immunoglobulin-like domain containing Receptor Tyrosine Kinases | 0.134936002 | 6.616 | 1   |
| 245 | FLT3   | ENST00000380982 | p.Y457C                  | c.1370      | CD molecules Immunoglobulin-like domain containing Receptor Tyrosine Kinases | 0.305975614 | 3.49  | 1   |
| 245 | FLT3   | ENST00000380982 | p.D362N                  | c.1084      | CD molecules Immunoglobulin-like domain containing Receptor Tyrosine Kinases | 0.047102835 | 5.695 | 1   |
| 250 | SKP2   | ENST00000274255 | p.A162S                  | c.484       | F-box and leucine-rich repeat proteins                                       | 0.081086403 | 4.718 | 1   |
| 250 | SKP2   | ENST00000274255 | p.R182C                  | c.544       | F-box and leucine-rich repeat proteins                                       | 1.131096556 | 6.173 | 2   |
| 250 | SKP2   | ENST00000274255 | p.V183I                  | c.547       | F-box and leucine-rich repeat proteins                                       | 1.199779439 | 0     | 1   |
| 250 | SKP2   | ENST00000274255 | p.V183A                  | c.548       | F-box and leucine-rich repeat proteins                                       | 1.199779439 | 0     | 1   |
| 250 | SKP2   | ENST00000274255 | p.S212I                  | c.635       | F-box and leucine-rich repeat proteins                                       | 0.479978944 | 2.899 | 1   |
| 322 | DNMT3A | ENST00000321117 | p.R899S                  | c.2695      | Unclassified                                                                 | 0.130712698 | 7.265 | 1   |
| 322 | DNMT3A | ENST00000321117 | p.G890D                  | c.2669      | Unclassified                                                                 | 1.084617507 | 7.529 | 1   |
| 322 | DNMT3A | ENST00000321117 | p.G890C                  | c.2668      | Unclassified                                                                 | 1.084617507 | 7.529 | 1   |
| 322 | DNMT3A | ENST00000321117 | p.R792H                  | c.2375      | Unclassified                                                                 | 1.203191529 | 0     | 2   |
| 322 | DNMT3A | ENST00000321117 | p.R771Q                  | c.2312      | Unclassified                                                                 | 1.046394554 | 6.339 | 2   |
| 322 | DNMT3A | ENST00000321117 | p.F751I                  | c.2251      | Unclassified                                                                 | 0.430543357 | 2.682 | 1   |
| 322 | DNMT3A | ENST00000321117 | p.R749C                  | c.2245      | Unclassified                                                                 | 0.011023099 | 8.404 | 1   |
| 322 | DNMT3A | ENST00000321117 | p.R720H                  | c.2159      | Unclassified                                                                 | 0.004756117 | 8.716 | 1   |
| 323 | EGFR   | ENST00000275493 | p.L541F                  | c.1621      | Receptor Tyrosine Kinases                                                    | 1.029096713 | 0     | 1   |
| 323 | EGFR   | ENST00000275493 | p.L541I                  | c.1621      | Receptor Tyrosine Kinases                                                    | 1.029096713 | 0     | 1   |
| 323 | EGFR   | ENST00000275493 | p.C571S                  | c.1712      | Receptor Tyrosine Kinases                                                    | 0.098447858 | 5.103 | 1   |
| 325 | NFE2L2 | ENST00000397062 | p.A511V                  | c.1532      | Basic leucine zipper proteins                                                | 0.273573425 | 0     | 1   |
| 325 | NFE2L2 | ENST00000397062 | p.R449H                  | c.1346      | Basic leucine zipper proteins                                                | 0.273573425 | 1.87  | 1   |
| 329 | PIK3CA | ENST00000263967 | p.R357Q                  | c.1070      | Phosphatidylinositol 3-kinase subunits                                       | 0.350834281 | 6.449 | 1   |
| 329 | PIK3CA | ENST00000263967 | p.C420G                  | c.1258      | Phosphatidylinositol 3-kinase subunits                                       | 12.46618189 | 0     | 1   |
| 329 | PIK3CA | ENST00000263967 | p.C420R                  | c.1258      | Phosphatidylinositol 3-kinase subunits                                       | 12.46618189 | 0     | 12  |
| 329 | PIK3CA | ENST00000263967 | p.G451R                  | c.1351      | Phosphatidylinositol 3-kinase subunits                                       | 1.751534707 | 4.15  | 1   |
| 329 | PIK3CA | ENST00000263967 | p.G451V                  | c.1352      | Phosphatidylinositol 3-kinase subunits                                       | 1.751534707 | 4.15  | 1   |
| 329 | PIK3CA | ENST00000263967 | p.E453K                  | c.1357      | Phosphatidylinositol 3-kinase subunits                                       | 10.30262515 | 5.445 | 8   |
| 329 | PIK3CA | ENST00000263967 | p.E453Q                  | c.1357      | Phosphatidylinositol 3-kinase subunits                                       | 10.30262515 | 5.445 | 2   |
| 329 | PIK3CA | ENST00000263967 | p.E453D                  | c.1359      | Phosphatidylinositol 3-kinase subunits                                       | 10.30262515 | 5.445 | 1   |
| 329 | PIK3CA | ENST00000263967 | p.D454Y                  | c.1360      | Phosphatidylinositol 3-kinase subunits                                       | 0.298062548 | 5.699 | 1   |
| 329 | PIK3CA | ENST00000263967 | p.LLNPIG455in_frame_delf | c.1365_1379 | Phosphatidylinositol 3-kinase subunits                                       | 1.108957729 | 3.83  | 1   |
| 333 | DNMT3A | ENST00000321117 | p.P419L                  | c.1256      | Unclassified                                                                 | 1.006488047 | 0     | 1   |
| 333 | DNMT3A | ENST00000321117 | p.P419T                  | c.1255      | Unclassified                                                                 | 1.006488047 | 0     | 1   |
| 333 | DNMT3A | ENST00000321117 | p.A380V                  | c.1139      | Unclassified                                                                 | 0.030121906 | 7.268 | 1   |
| 336 | FGFR2  | ENST00000457416 | p.H242Y                  | c.724       | CD molecules I-set domain containing Receptor Tyrosine Kinases               | 0.164701684 | 5.146 | 1   |
| 336 | FGFR2  | ENST00000457416 | p.R165W                  | c.493       | CD molecules I-set domain containing Receptor Tyrosine Kinases               | 0.148636975 | 8.383 | 1   |
| 336 | FGFR2  | ENST00000457416 | p.E163K                  | c.487       | CD molecules I-set domain containing Receptor Tyrosine Kinases               | 1.031237747 | 0     | 2   |
| 346 | BRAF   | ENST00000288602 | p.K601E                  | c.1801      | Unclassified                                                                 | 7.727589944 | 9.577 | 8   |
| 346 | BRAF   | ENST00000288602 | p.V600E                  | c.1800_1799 | Unclassified                                                                 | 321.0767445 | 0     | 307 |
| 346 | BRAF   | ENST00000288602 | p.V600K                  | c.1799_1798 | Unclassified                                                                 | 321.0767445 | 0     | 13  |
| 346 | BRAF   | ENST00000288602 | p.V600R                  | c.1799_1798 | Unclassified                                                                 | 321.0767445 | 0     | 2   |
| 346 | BRAF   | ENST00000288602 | p.L597Q                  | c.1790      | Unclassified                                                                 | 2.379273653 | 8.532 | 1   |
| 346 | BRAF   | ENST00000288602 | p.G596D                  | c.1787      | Unclassified                                                                 | 2.512428361 | 8.181 | 1   |
| 346 | BRAF   | ENST00000288602 | p.D594G                  | c.1781      | Unclassified                                                                 | 5.383646501 | 7.975 | 1   |
| 346 | BRAF   | ENST00000288602 | p.D594H                  | c.1780      | Unclassified                                                                 | 5.383646501 | 7.975 | 1   |
| 346 | BRAF   | ENST00000288602 | p.D594N                  | c.1780      | Unclassified                                                                 | 5.383646501 | 7.975 | 2   |
| 346 | BRAF   | ENST00000288602 | p.S467L                  | c.1400      | Unclassified                                                                 | 9.82216427  | 5.499 | 2   |
| 371 | PIK3CA | ENST00000263967 | p.R38C                   | c.112       | Phosphatidylinositol 3-kinase subunits                                       | 9.241239798 | 4.472 | 2   |
| 371 | PIK3CA | ENST00000263967 | p.R38S                   | c.112       | Phosphatidylinositol 3-kinase subunits                                       | 9.241239798 | 4.472 | 1   |
| 371 | PIK3CA | ENST00000263967 | p.R38H                   | c.113       | Phosphatidylinositol 3-kinase subunits                                       | 9.241239798 | 4.472 | 5   |
| 371 | PIK3CA | ENST00000263967 | p.R38L                   | c.113       | Phosphatidylinositol 3-kinase subunits                                       | 9.241239798 | 4.472 | 1   |
| 371 | PIK3CA | ENST00000263967 | p.E39K                   | c.115       | Phosphatidylinositol 3-kinase subunits                                       | 7.197941223 | 2.806 | 4   |



|     |        |                 |                           |             |                                                                              |             |       |    |
|-----|--------|-----------------|---------------------------|-------------|------------------------------------------------------------------------------|-------------|-------|----|
| 371 | PIK3CA | ENST00000263967 | p.E39G                    | c.116       | Phosphatidylinositol 3-kinase subunits                                       | 7.197941223 | 2.806 | 1  |
| 371 | PIK3CA | ENST00000263967 | p.R88Q                    | c.263       | Phosphatidylinositol 3-kinase subunits                                       | 21.13826212 | 0     | 21 |
| 371 | PIK3CA | ENST00000263967 | p.C90G                    | c.268       | Phosphatidylinositol 3-kinase subunits                                       | 2.655319912 | 6.815 | 1  |
| 371 | PIK3CA | ENST00000263967 | p.C90Y                    | c.269       | Phosphatidylinositol 3-kinase subunits                                       | 2.655319912 | 6.815 | 1  |
| 373 | KIT    | ENST00000288135 | p.E128K                   | c.382       | CD molecules Immunoglobulin-like domain containing Receptor Tyrosine Kinases | 0.394104291 | 0     | 1  |
| 373 | KIT    | ENST00000288135 | p.K176N                   | c.528       | CD molecules Immunoglobulin-like domain containing Receptor Tyrosine Kinases | 0.123547665 | 4.669 | 1  |
| 373 | KIT    | ENST00000288135 | p.R177L                   | c.530       | CD molecules Immunoglobulin-like domain containing Receptor Tyrosine Kinases | 0.276391345 | 2.666 | 1  |
| 373 | KIT    | ENST00000288135 | p.V204A                   | c.611       | CD molecules Immunoglobulin-like domain containing Receptor Tyrosine Kinases | 0.22105492  | 3.707 | 1  |
| 373 | KIT    | ENST00000288135 | p.K209I                   | c.626       | CD molecules Immunoglobulin-like domain containing Receptor Tyrosine Kinases | 0.185336079 | 3.051 | 1  |
| 388 | EGFR   | ENST00000275493 | p.T354M                   | c.1061      | Receptor Tyrosine Kinases                                                    | 0.201953377 | 0     | 1  |
| 388 | EGFR   | ENST00000275493 | p.R377S                   | c.1131      | Receptor Tyrosine Kinases                                                    | 0.016087021 | 6.207 | 1  |
| 388 | EGFR   | ENST00000275493 | p.T384S                   | c.1151      | Receptor Tyrosine Kinases                                                    | 0.190967371 | 2.408 | 1  |
| 405 | U2AF1  | ENST00000291552 | p.222in_frame_insG        | c.654_653   | RNA binding motif containing                                                 | 1.020142273 | 0     | 2  |
| 405 | U2AF1  | ENST00000291552 | p.V115I                   | c.343       | RNA binding motif containing                                                 | 0.129029823 | 8.808 | 1  |
| 405 | U2AF1  | ENST00000464750 | p.I46V                    | c.136       | RNA binding motif containing                                                 | 0.160389789 | 5.803 | 1  |
| 491 | MAP2K1 | ENST00000307102 | p.R47Q                    | c.140       | Mitogen-activated protein kinase kinases                                     | 0.231426535 | 5.902 | 1  |
| 491 | MAP2K1 | ENST00000307102 | p.N122D                   | c.364       | Mitogen-activated protein kinase kinases                                     | 0.394980667 | 9.478 | 1  |
| 491 | MAP2K1 | ENST00000307102 | p.P124L                   | c.370_371   | Mitogen-activated protein kinase kinases                                     | 6.390594297 | 0     | 1  |
| 491 | MAP2K1 | ENST00000307102 | p.P124S                   | c.370       | Mitogen-activated protein kinase kinases                                     | 6.390594297 | 0     | 6  |
| 491 | MAP2K1 | ENST00000307102 | p.E203K                   | c.607       | Mitogen-activated protein kinase kinases                                     | 4.575116579 | 3.762 | 4  |
| 491 | MAP2K1 | ENST00000307102 | p.E203V                   | c.608       | Mitogen-activated protein kinase kinases                                     | 4.575116579 | 3.762 | 1  |
| 491 | MAP2K1 | ENST00000307102 | p.E333A                   | c.998       | Mitogen-activated protein kinase kinases                                     | 0.394005011 | 7.995 | 1  |
| 515 | SPOP   | ENST00000393331 | p.G75L                    | c.224_223   | BTB (POZ) domain containing                                                  | 0.240047779 | 4.457 | 1  |
| 515 | SPOP   | ENST00000393331 | p.E50K                    | c.148       | BTB (POZ) domain containing                                                  | 2.049727278 | 0     | 3  |
| 515 | SPOP   | ENST00000393331 | p.E47A                    | c.140       | BTB (POZ) domain containing                                                  | 0.065909832 | 8.61  | 1  |
| 515 | SPOP   | ENST00000393331 | p.R45W                    | c.133       | BTB (POZ) domain containing                                                  | 0.042877303 | 9.255 | 1  |
| 698 | CBL    | ENST00000264033 | p.C384W                   | c.1152      | Ring finger proteins                                                         | 0.019357011 | 5.691 | 1  |
| 698 | CBL    | ENST00000264033 | p.F418L                   | c.1252      | Ring finger proteins                                                         | 0.019357011 | 0     | 1  |
| 768 | EGFR   | ENST00000275493 | p.L62R                    | c.185       | Receptor Tyrosine Kinases                                                    | 3.315453444 | 4.396 | 3  |
| 768 | EGFR   | ENST00000275493 | p.G63K                    | c.187_188   | Receptor Tyrosine Kinases                                                    | 1.337871862 | 8.752 | 1  |
| 768 | EGFR   | ENST00000275493 | p.G63R                    | c.187       | Receptor Tyrosine Kinases                                                    | 1.337871862 | 8.752 | 1  |
| 768 | EGFR   | ENST00000275493 | p.E84V                    | c.251       | Receptor Tyrosine Kinases                                                    | 1.983348841 | 4.67  | 1  |
| 768 | EGFR   | ENST00000275493 | p.V85M                    | c.253       | Receptor Tyrosine Kinases                                                    | 2.319236077 | 5.533 | 1  |
| 768 | EGFR   | ENST00000275493 | p.R108G                   | c.322       | Receptor Tyrosine Kinases                                                    | 7.383260425 | 3.531 | 1  |
| 768 | EGFR   | ENST00000275493 | p.R108K                   | c.323       | Receptor Tyrosine Kinases                                                    | 7.383260425 | 3.531 | 4  |
| 768 | EGFR   | ENST00000275493 | p.R222C                   | c.664       | Receptor Tyrosine Kinases                                                    | 4.707773717 | 8.599 | 5  |
| 768 | EGFR   | ENST00000275493 | p.R252C                   | c.754       | Receptor Tyrosine Kinases                                                    | 6.777874813 | 5.204 | 3  |
| 768 | EGFR   | ENST00000275493 | p.R252P                   | c.755       | Receptor Tyrosine Kinases                                                    | 6.777874813 | 5.204 | 3  |
| 768 | EGFR   | ENST00000275493 | p.F254I                   | c.760       | Receptor Tyrosine Kinases                                                    | 4.630001099 | 2.504 | 1  |
| 768 | EGFR   | ENST00000275493 | p.D256Y                   | c.766       | Receptor Tyrosine Kinases                                                    | 0.73400312  | 5.182 | 1  |
| 768 | EGFR   | ENST00000275493 | p.C264Y                   | c.791       | Receptor Tyrosine Kinases                                                    | 0.498008522 | 5.848 | 1  |
| 768 | EGFR   | ENST00000275493 | p.A289I                   | c.865_866   | Receptor Tyrosine Kinases                                                    | 25.04363397 | 0     | 1  |
| 768 | EGFR   | ENST00000275493 | p.A289N                   | c.865_866   | Receptor Tyrosine Kinases                                                    | 25.04363397 | 0     | 1  |
| 768 | EGFR   | ENST00000275493 | p.A289T                   | c.865       | Receptor Tyrosine Kinases                                                    | 25.04363397 | 0     | 6  |
| 768 | EGFR   | ENST00000275493 | p.A289D                   | c.866       | Receptor Tyrosine Kinases                                                    | 25.04363397 | 0     | 3  |
| 768 | EGFR   | ENST00000275493 | p.A289V                   | c.866       | Receptor Tyrosine Kinases                                                    | 25.04363397 | 0     | 14 |
| 768 | EGFR   | ENST00000275493 | p.H304Y                   | c.910       | Receptor Tyrosine Kinases                                                    | 2.172632678 | 8.916 | 3  |
| 788 | PIK3CA | ENST00000263967 | p.T342S                   | c.1024      | Phosphatidylinositol 3-kinase subunits                                       | 1.450583481 | 5.919 | 1  |
| 788 | PIK3CA | ENST00000263967 | p.V344M                   | c.1030      | Phosphatidylinositol 3-kinase subunits                                       | 9.287951282 | 5.881 | 4  |
| 788 | PIK3CA | ENST00000263967 | p.V344A                   | c.1031      | Phosphatidylinositol 3-kinase subunits                                       | 9.287951282 | 5.881 | 2  |
| 788 | PIK3CA | ENST00000263967 | p.V344G                   | c.1031      | Phosphatidylinositol 3-kinase subunits                                       | 9.287951282 | 5.881 | 3  |
| 788 | PIK3CA | ENST00000263967 | p.N345I                   | c.1034      | Phosphatidylinositol 3-kinase subunits                                       | 23.55777267 | 0     | 1  |
| 788 | PIK3CA | ENST00000263967 | p.N345T                   | c.1034      | Phosphatidylinositol 3-kinase subunits                                       | 23.55777267 | 0     | 1  |
| 788 | PIK3CA | ENST00000263967 | p.N345K                   | c.1035      | Phosphatidylinositol 3-kinase subunits                                       | 23.55777267 | 0     | 22 |
| 788 | PIK3CA | ENST00000263967 | p.C378R                   | c.1132      | Phosphatidylinositol 3-kinase subunits                                       | 2.155005679 | 6.394 | 1  |
| 788 | PIK3CA | ENST00000263967 | p.C378Y                   | c.1133      | Phosphatidylinositol 3-kinase subunits                                       | 2.155005679 | 6.394 | 1  |
| 788 | PIK3CA | ENST00000263967 | p.VPVGLEDL447in_frame_del | c.1338_1364 | Phosphatidylinositol 3-kinase subunits                                       | 2.514557644 | 4.275 | 2  |

|      |        |                 |                                 |             |                                                                                  |             |       |     |
|------|--------|-----------------|---------------------------------|-------------|----------------------------------------------------------------------------------|-------------|-------|-----|
| 788  | PIK3CA | ENST00000263967 | p.E469in_frame_insDK            | c.1405_1406 | Phosphatidylinositol 3-kinase subunits                                           | 0.512273887 | 6.155 | 1   |
| 788  | PIK3CA | ENST00000263967 | p.P471A                         | c.1411      | Phosphatidylinositol 3-kinase subunits                                           | 6.175116951 | 3.6   | 1   |
| 788  | PIK3CA | ENST00000263967 | p.P471L                         | c.1412      | Phosphatidylinositol 3-kinase subunits                                           | 6.175116951 | 3.6   | 2   |
| 831  | RET    | ENST00000355710 | p.V706M                         | c.2116      | Cadherin-related   Receptor Tyrosine Kinases                                     | 0.02245219  | 0     | 1   |
| 831  | RET    | ENST00000355710 | p.R959V                         | c.2875      | Cadherin-related   Receptor Tyrosine Kinases                                     | 0.02245219  | 5.477 | 1   |
| 968  | PIK3CA | ENST00000263967 | p.Q958R                         | c.2873      | Phosphatidylinositol 3-kinase subunits                                           | 9.01433212  | 4.324 | 1   |
| 968  | PIK3CA | ENST00000263967 | p.H1047Y                        | c.3139      | Phosphatidylinositol 3-kinase subunits                                           | 168.0786511 | 0     | 1   |
| 968  | PIK3CA | ENST00000263967 | p.H1047L                        | c.3140      | Phosphatidylinositol 3-kinase subunits                                           | 168.0786511 | 0     | 21  |
| 968  | PIK3CA | ENST00000263967 | p.H1047R                        | c.3140      | Phosphatidylinositol 3-kinase subunits                                           | 168.0786511 | 0     | 146 |
| 968  | PIK3CA | ENST00000263967 | p.H1047Q                        | c.3141      | Phosphatidylinositol 3-kinase subunits                                           | 168.0786511 | 0     | 1   |
| 968  | PIK3CA | ENST00000263967 | p.H1048R                        | c.3143      | Phosphatidylinositol 3-kinase subunits                                           | 1.094458955 | 7.516 | 1   |
| 968  | PIK3CA | ENST00000263967 | p.G1049R                        | c.3145      | Phosphatidylinositol 3-kinase subunits                                           | 3.482561942 | 7.011 | 3   |
| 1018 | KIT    | ENST00000288135 | p.N566S                         | c.1697      | CD molecules   Immunoglobulin-like domain containing   Receptor Tyrosine Kinases | 0.091747442 | 9.731 | 1   |
| 1018 | KIT    | ENST00000288135 | p.V603D                         | c.1808      | CD molecules   Immunoglobulin-like domain containing   Receptor Tyrosine Kinases | 0.662711796 | 3.568 | 1   |
| 1018 | KIT    | ENST00000288135 | p.G812V                         | c.2435      | CD molecules   Immunoglobulin-like domain containing   Receptor Tyrosine Kinases | 0.425726186 | 5.859 | 1   |
| 1018 | KIT    | ENST00000288135 | p.D816Y                         | c.2446      | CD molecules   Immunoglobulin-like domain containing   Receptor Tyrosine Kinases | 4.102724845 | 0     | 1   |
| 1018 | KIT    | ENST00000288135 | p.D816V                         | c.2447      | CD molecules   Immunoglobulin-like domain containing   Receptor Tyrosine Kinases | 4.102724845 | 0     | 4   |
| 1020 | CSF1R  | ENST00000286301 | p.R256C                         | c.766       | CD molecules   Immunoglobulin-like domain containing   Receptor Tyrosine Kinases | 0.083431014 | 0     | 1   |
| 1020 | CSF1R  | ENST00000286301 | p.V229I                         | c.685       | CD molecules   Immunoglobulin-like domain containing   Receptor Tyrosine Kinases | 0.069556584 | 3.867 | 1   |
| 1020 | CSF1R  | ENST00000286301 | p.A226V                         | c.677       | CD molecules   Immunoglobulin-like domain containing   Receptor Tyrosine Kinases | 0.015916149 | 6.069 | 1   |
| 1066 | FLT3   | ENST00000380982 | p.R311Q                         | c.932       | CD molecules   Immunoglobulin-like domain containing   Receptor Tyrosine Kinases | 0.014680043 | 0     | 1   |
| 1066 | FLT3   | ENST00000380982 | p.H276Y                         | c.826       | CD molecules   Immunoglobulin-like domain containing   Receptor Tyrosine Kinases | 0.014680043 | 6.09  | 1   |
| 1087 | BRAF   | ENST00000288602 | p.E228V                         | c.683       | Unclassified                                                                     | 0.009532035 | 0     | 1   |
| 1087 | BRAF   | ENST00000288602 | p.K205Q                         | c.613       | Unclassified                                                                     | 0.009532035 | 6.713 | 1   |
| 1155 | SPOP   | ENST00000393331 | p.F133C                         | c.398       | BTB (POZ) domain containing                                                      | 0.233547001 | 5.55  | 1   |
| 1155 | SPOP   | ENST00000393331 | p.W131C                         | c.393       | BTB (POZ) domain containing                                                      | 2.234095683 | 0     | 1   |
| 1155 | SPOP   | ENST00000393331 | p.W131G                         | c.391       | BTB (POZ) domain containing                                                      | 2.234095683 | 0     | 1   |
| 1155 | SPOP   | ENST00000393331 | p.W131R                         | c.391       | BTB (POZ) domain containing                                                      | 2.234095683 | 0     | 1   |
| 1155 | SPOP   | ENST00000393331 | p.R121Q                         | c.362       | BTB (POZ) domain containing                                                      | 1.118275762 | 8.985 | 2   |
| 1155 | SPOP   | ENST00000393331 | p.P94R                          | c.281       | BTB (POZ) domain containing                                                      | 0.227428579 | 4.725 | 1   |
| 1155 | SPOP   | ENST00000393331 | p.Y87S                          | c.260       | BTB (POZ) domain containing                                                      | 0.649846313 | 2.548 | 1   |
| 1215 | FLT3   | ENST00000380982 | p.D835E                         | c.2505      | CD molecules   Immunoglobulin-like domain containing   Receptor Tyrosine Kinases | 15.12335553 | 0     | 3   |
| 1215 | FLT3   | ENST00000380982 | p.D835H                         | c.2503      | CD molecules   Immunoglobulin-like domain containing   Receptor Tyrosine Kinases | 15.12335553 | 0     | 2   |
| 1215 | FLT3   | ENST00000380982 | p.D835Y                         | c.2503      | CD molecules   Immunoglobulin-like domain containing   Receptor Tyrosine Kinases | 15.12335553 | 0     | 11  |
| 1215 | FLT3   | ENST00000380982 | p.S618L                         | c.1853      | CD molecules   Immunoglobulin-like domain containing   Receptor Tyrosine Kinases | 1.675974269 | 3.255 | 1   |
| 1215 | FLT3   | ENST00000380982 | p.G617E                         | c.1850      | CD molecules   Immunoglobulin-like domain containing   Receptor Tyrosine Kinases | 1.148857106 | 6.748 | 2   |
| 1219 | CTNNB1 | ENST00000349496 | p.A215T                         | c.643       | Armadillo repeat containing                                                      | 0.009420374 | 6.73  | 1   |
| 1219 | CTNNB1 | ENST00000349496 | p.T257I                         | c.770       | Armadillo repeat containing                                                      | 0.018538796 | 0     | 1   |
| 1219 | CTNNB1 | ENST00000349496 | p.K292E                         | c.874       | Armadillo repeat containing                                                      | 0.015697039 | 6.777 | 1   |
| 1254 | CTNNB1 | ENST00000349496 | p.R587Q                         | c.1760      | Armadillo repeat containing                                                      | 0.158707464 | 6.554 | 1   |
| 1254 | CTNNB1 | ENST00000349496 | p.C619Y                         | c.1856      | Armadillo repeat containing                                                      | 1.012050775 | 0     | 2   |
| 1254 | CTNNB1 | ENST00000349496 | p.Q623E                         | c.1867      | Armadillo repeat containing                                                      | 0.173760419 | 9.472 | 1   |
| 1302 | FGFR2  | ENST00000457416 | p.M723I                         | c.2169      | CD molecules   I-set domain containing   Receptor Tyrosine Kinases               | 0.039157174 | 0     | 1   |
| 1302 | FGFR2  | ENST00000457416 | p.E696K                         | c.2086      | CD molecules   I-set domain containing   Receptor Tyrosine Kinases               | 0.015292838 | 6.031 | 1   |
| 1302 | FGFR2  | ENST00000457416 | p.G691R                         | c.2071      | CD molecules   I-set domain containing   Receptor Tyrosine Kinases               | 0.023864336 | 5.389 | 1   |
| 1308 | CBL    | ENST00000264033 | p.E143D                         | c.429       | Ring finger proteins                                                             | 0.0206992   | 5.812 | 1   |
| 1308 | CBL    | ENST00000264033 | p.R149Q                         | c.446       | Ring finger proteins                                                             | 0.165792854 | 2.618 | 1   |
| 1308 | CBL    | ENST00000264033 | p.E276K                         | c.826       | Ring finger proteins                                                             | 0.180693134 | 0     | 1   |
| 1342 | FLT3   | ENST00000380982 | p.594in_frame_insGTGSSDNEYFYVDF | c.1783_1782 | CD molecules   Immunoglobulin-like domain containing   Receptor Tyrosine Kinases | 2.005403088 | 0     | 1   |
| 1342 | FLT3   | ENST00000380982 | p.594in_frame_insSDNEYFYVDF     | c.1783_1782 | CD molecules   Immunoglobulin-like domain containing   Receptor Tyrosine Kinases | 2.005403088 | 0     | 1   |
| 1342 | FLT3   | ENST00000380982 | p.594in_frame_insSPEDNEYFYVD    | c.1781_1780 | CD molecules   Immunoglobulin-like domain containing   Receptor Tyrosine Kinases | 2.005403088 | 0     | 1   |
| 1342 | FLT3   | ENST00000380982 | p.S127F                         | c.380       | CD molecules   Immunoglobulin-like domain containing   Receptor Tyrosine Kinases | 0.016209265 | 7.532 | 1   |
| 1345 | SPOP   | ENST00000393331 | p.L282R                         | c.845       | BTB (POZ) domain containing                                                      | 0.028135362 | 5.295 | 1   |
| 1345 | SPOP   | ENST00000393331 | p.A281S                         | c.841       | BTB (POZ) domain containing                                                      | 0.107267632 | 3.257 | 1   |
| 1345 | SPOP   | ENST00000393331 | p.P223S                         | c.667       | BTB (POZ) domain containing                                                      | 0.130074291 | 0     | 1   |
| 1368 | MET    | ENST00000318493 | p.L1223V                        | c.3667      | Receptor Tyrosine Kinases                                                        | 0.009407323 | 6.732 | 1   |
| 1368 | MET    | ENST00000318493 | p.M1268T                        | c.3803      | Receptor Tyrosine Kinases                                                        | 0.009407323 | 0     | 1   |

|      |        |                 |          |           |                                                                            |             |       |     |
|------|--------|-----------------|----------|-----------|----------------------------------------------------------------------------|-------------|-------|-----|
| 1419 | KRAS   | ENST00000256078 | p.E62K   | c.184     | RAS type family GTPases                                                    | 5.558446135 | 5.185 | 1   |
| 1419 | KRAS   | ENST00000256078 | p.Q61H   | c.183     | RAS type family GTPases                                                    | 37.49946109 | 3.423 | 8   |
| 1419 | KRAS   | ENST00000256078 | p.Q61L   | c.182     | RAS type family GTPases                                                    | 37.49946109 | 3.423 | 6   |
| 1419 | KRAS   | ENST00000256078 | p.Q61R   | c.182     | RAS type family GTPases                                                    | 37.49946109 | 3.423 | 3   |
| 1419 | KRAS   | ENST00000256078 | p.Q61K   | c.181_180 | RAS type family GTPases                                                    | 37.49946109 | 3.423 | 3   |
| 1419 | KRAS   | ENST00000256078 | p.A59E   | c.176     | RAS type family GTPases                                                    | 27.87368317 | 3.003 | 1   |
| 1419 | KRAS   | ENST00000256078 | p.A59G   | c.176     | RAS type family GTPases                                                    | 27.87368317 | 3.003 | 1   |
| 1419 | KRAS   | ENST00000256078 | p.A59T   | c.175     | RAS type family GTPases                                                    | 27.87368317 | 3.003 | 1   |
| 1419 | KRAS   | ENST00000256078 | p.I36M   | c.108     | RAS type family GTPases                                                    | 4.180603825 | 5.798 | 1   |
| 1419 | KRAS   | ENST00000256078 | p.G13D   | c.38      | RAS type family GTPases                                                    | 29.75340752 | 8.235 | 25  |
| 1419 | KRAS   | ENST00000256078 | p.G13V   | c.38      | RAS type family GTPases                                                    | 29.75340752 | 8.235 | 1   |
| 1419 | KRAS   | ENST00000256078 | p.G13C   | c.37      | RAS type family GTPases                                                    | 29.75340752 | 8.235 | 3   |
| 1419 | KRAS   | ENST00000256078 | p.G12A   | c.35      | RAS type family GTPases                                                    | 199.3806168 | 0     | 12  |
| 1419 | KRAS   | ENST00000256078 | p.G12D   | c.35      | RAS type family GTPases                                                    | 199.3806168 | 0     | 68  |
| 1419 | KRAS   | ENST00000256078 | p.G12F   | c.35_34   | RAS type family GTPases                                                    | 199.3806168 | 0     | 2   |
| 1419 | KRAS   | ENST00000256078 | p.G12V   | c.35      | RAS type family GTPases                                                    | 199.3806168 | 0     | 63  |
| 1419 | KRAS   | ENST00000256078 | p.G12C   | c.34      | RAS type family GTPases                                                    | 199.3806168 | 0     | 43  |
| 1419 | KRAS   | ENST00000256078 | p.G12R   | c.34      | RAS type family GTPases                                                    | 199.3806168 | 0     | 6   |
| 1419 | KRAS   | ENST00000256078 | p.G12S   | c.34      | RAS type family GTPases                                                    | 199.3806168 | 0     | 4   |
| 1450 | TSHR   | ENST00000298171 | p.N135K  | c.405     | Glycoprotein hormone receptors                                             | 0.022460568 | 6.466 | 1   |
| 1450 | TSHR   | ENST00000298171 | p.N187D  | c.559     | Glycoprotein hormone receptors                                             | 0.053764713 | 0     | 1   |
| 1450 | TSHR   | ENST00000298171 | p.K211T  | c.632     | Glycoprotein hormone receptors                                             | 0.042452696 | 4.558 | 1   |
| 1495 | JAK2   | ENST00000539801 | p.I540N  | c.1619    | SH2 domain containing                                                      | 0.169038195 | 4.668 | 1   |
| 1495 | JAK2   | ENST00000539801 | p.R564G  | c.1690    | SH2 domain containing                                                      | 0.087550345 | 8.291 | 1   |
| 1495 | JAK2   | ENST00000539801 | p.V617F  | c.1849    | SH2 domain containing                                                      | 1.042528878 | 0     | 2   |
| 1521 | PIK3CA | ENST00000263967 | p.D725N  | c.2173    | Phosphatidylinositol 3-kinase subunits                                     | 0.058879648 | 9.378 | 1   |
| 1521 | PIK3CA | ENST00000263967 | p.E726K  | c.2176    | Phosphatidylinositol 3-kinase subunits                                     | 13.1603819  | 0     | 14  |
| 1521 | PIK3CA | ENST00000263967 | p.R777K  | c.2330    | Phosphatidylinositol 3-kinase subunits                                     | 2.131071995 | 3.654 | 1   |
| 1521 | PIK3CA | ENST00000263967 | p.R777M  | c.2330    | Phosphatidylinositol 3-kinase subunits                                     | 2.131071995 | 3.654 | 1   |
| 1532 | JAK1   | ENST00000342505 | p.S1141C | c.3421    | Unclassified                                                               | 0.044116816 | 4.599 | 1   |
| 1532 | JAK1   | ENST00000342505 | p.R1139W | c.3415    | Unclassified                                                               | 0.020868526 | 5.679 | 1   |
| 1532 | JAK1   | ENST00000342505 | p.G962E  | c.2885    | Unclassified                                                               | 0.016763561 | 5.995 | 1   |
| 1532 | JAK1   | ENST00000342505 | p.F958C  | c.2873    | Unclassified                                                               | 0.074443838 | 3.854 | 1   |
| 1532 | JAK1   | ENST00000342505 | p.R879H  | c.2636    | Unclassified                                                               | 0.145617234 | 0     | 1   |
| 1533 | ERBB2  | ENST00000269571 | p.D742H  | c.2224    | CD molecules  Receptor Tyrosine Kinases  minor histocompatibility antigens | 0.007259068 | 0     | 1   |
| 1533 | ERBB2  | ENST00000269571 | p.K937R  | c.2810    | CD molecules  Receptor Tyrosine Kinases  minor histocompatibility antigens | 0.007259068 | 7.106 | 1   |
| 1568 | PIK3CA | ENST00000263967 | p.N170S  | c.509     | Phosphatidylinositol 3-kinase subunits                                     | 0.012456132 | 6.327 | 1   |
| 1568 | PIK3CA | ENST00000263967 | p.S629C  | c.1886    | Phosphatidylinositol 3-kinase subunits                                     | 0.045328063 | 0     | 1   |
| 1568 | PIK3CA | ENST00000263967 | p.R818C  | c.2452    | Phosphatidylinositol 3-kinase subunits                                     | 0.032871931 | 4.927 | 1   |
| 1606 | IDH1   | ENST00000415913 | p.M291I  | c.873     | Unclassified                                                               | 1.972091686 | 6.572 | 1   |
| 1606 | IDH1   | ENST00000415913 | p.R132H  | c.395     | Unclassified                                                               | 177.1233233 | 0     | 137 |
| 1606 | IDH1   | ENST00000415913 | p.R132L  | c.395     | Unclassified                                                               | 177.1233233 | 0     | 1   |
| 1606 | IDH1   | ENST00000415913 | p.R132C  | c.394     | Unclassified                                                               | 177.1233233 | 0     | 28  |
| 1606 | IDH1   | ENST00000415913 | p.R132G  | c.394     | Unclassified                                                               | 177.1233233 | 0     | 7   |
| 1606 | IDH1   | ENST00000415913 | p.R132S  | c.394     | Unclassified                                                               | 177.1233233 | 0     | 5   |
| 1606 | IDH1   | ENST00000415913 | p.R109K  | c.326     | Unclassified                                                               | 20.17381059 | 3.148 | 1   |
| 1653 | HRAS   | ENST00000311189 | p.Q61L   | c.182     | RAS type family GTPases                                                    | 18.44203447 | 0     | 2   |
| 1653 | HRAS   | ENST00000311189 | p.Q61R   | c.182     | RAS type family GTPases                                                    | 18.44203447 | 0     | 10  |
| 1653 | HRAS   | ENST00000311189 | p.Q61K   | c.181     | RAS type family GTPases                                                    | 18.44203447 | 0     | 5   |
| 1653 | HRAS   | ENST00000311189 | p.A59T   | c.175     | RAS type family GTPases                                                    | 1.124093262 | 5.706 | 1   |
| 1653 | HRAS   | ENST00000311189 | p.D33N   | c.97      | RAS type family GTPases                                                    | 0.598317025 | 5.153 | 1   |
| 1653 | HRAS   | ENST00000311189 | p.G13D   | c.38      | RAS type family GTPases                                                    | 9.154840729 | 4.032 | 1   |
| 1653 | HRAS   | ENST00000311189 | p.G13V   | c.38      | RAS type family GTPases                                                    | 9.154840729 | 4.032 | 3   |
| 1653 | HRAS   | ENST00000311189 | p.G13C   | c.37      | RAS type family GTPases                                                    | 9.154840729 | 4.032 | 1   |
| 1653 | HRAS   | ENST00000311189 | p.G13R   | c.37      | RAS type family GTPases                                                    | 9.154840729 | 4.032 | 3   |
| 1653 | HRAS   | ENST00000311189 | p.G13S   | c.37      | RAS type family GTPases                                                    | 9.154840729 | 4.032 | 1   |
| 1653 | HRAS   | ENST00000311189 | p.G12A   | c.35      | RAS type family GTPases                                                    | 10.90356124 | 2.214 | 1   |

|      |         |                 |                    |             |                                                                                |             |       |   |
|------|---------|-----------------|--------------------|-------------|--------------------------------------------------------------------------------|-------------|-------|---|
| 1653 | HRAS    | ENST00000311189 | p.G12D             | c.35        | RAS type family GTPases                                                        | 10.90356124 | 2.214 | 4 |
| 1653 | HRAS    | ENST00000311189 | p.G12C             | c.34        | RAS type family GTPases                                                        | 10.90356124 | 2.214 | 1 |
| 1653 | HRAS    | ENST00000311189 | p.G12S             | c.34        | RAS type family GTPases                                                        | 10.90356124 | 2.214 | 2 |
| 1653 | HRAS    | ENST00000311189 | p.A11D             | c.32        | RAS type family GTPases                                                        | 2.346200201 | 3.055 | 1 |
| 1701 | SPOP    | ENST00000393331 | p.K238E            | c.712       | BTB (POZ) domain containing                                                    | 0.017181502 | 0     | 1 |
| 1701 | SPOP    | ENST00000393331 | p.D201H            | c.601       | BTB (POZ) domain containing                                                    | 0.017181502 | 5.863 | 1 |
| 1836 | MET     | ENST00000318493 | p.V1088E           | c.3263      | Receptor Tyrosine Kinases                                                      | 1.099146805 | 0     | 2 |
| 1836 | MET     | ENST00000318493 | p.T1114S           | c.3341      | Receptor Tyrosine Kinases                                                      | 0.145127428 | 3.797 | 1 |
| 1836 | MET     | ENST00000318493 | p.N1118D           | c.3352      | Receptor Tyrosine Kinases                                                      | 0.019901211 | 6.651 | 1 |
| 1836 | MET     | ENST00000318493 | p.R1166Q           | c.3497      | Receptor Tyrosine Kinases                                                      | 0.035747456 | 5.857 | 1 |
| 1847 | DNMT3A  | ENST00000321117 | p.I407T            | c.1220      | Unclassified                                                                   | 0.079872238 | 0     | 1 |
| 1847 | DNMT3A  | ENST00000321117 | p.Q374L            | c.1121      | Unclassified                                                                   | 0.0146298   | 7.174 | 1 |
| 1847 | DNMT3A  | ENST00000321117 | p.Y359C            | c.1076      | Unclassified                                                                   | 0.075519192 | 3.777 | 1 |
| 1888 | ERBB2   | ENST00000269571 | p.I767M            | c.2301      | CD molecules  Receptor Tyrosine Kinases  minor histocompatibility antigens     | 0.026413894 | 9.142 | 1 |
| 1888 | ERBB2   | ENST00000269571 | p.D769H            | c.2305      | CD molecules  Receptor Tyrosine Kinases  minor histocompatibility antigens     | 3.030425839 | 8.938 | 1 |
| 1888 | ERBB2   | ENST00000269571 | p.D769N            | c.2305      | CD molecules  Receptor Tyrosine Kinases  minor histocompatibility antigens     | 3.030425839 | 8.938 | 1 |
| 1888 | ERBB2   | ENST00000269571 | p.D769Y            | c.2305      | CD molecules  Receptor Tyrosine Kinases  minor histocompatibility antigens     | 3.030425839 | 8.938 | 1 |
| 1888 | ERBB2   | ENST00000269571 | p.V842I            | c.2524      | CD molecules  Receptor Tyrosine Kinases  minor histocompatibility antigens     | 6.136144517 | 0     | 2 |
| 1888 | ERBB2   | ENST00000269571 | p.R868W            | c.2602      | CD molecules  Receptor Tyrosine Kinases  minor histocompatibility antigens     | 0.962170401 | 2.986 | 1 |
| 1897 | KIT     | ENST00000288135 | p.M552L            | c.1654      | CD molecules  Immunoglobulin-like domain containing  Receptor Tyrosine Kinases | 0.023494018 | 0     | 1 |
| 1897 | KIT     | ENST00000288135 | p.L631F            | c.1893      | CD molecules  Immunoglobulin-like domain containing  Receptor Tyrosine Kinases | 0.009957505 | 6.65  | 1 |
| 1897 | KIT     | ENST00000288135 | p.K826N            | c.2478      | CD molecules  Immunoglobulin-like domain containing  Receptor Tyrosine Kinases | 0.013536513 | 6.207 | 1 |
| 1906 | JAK1    | ENST00000342505 | p.Y999H            | c.2995      | Unclassified                                                                   | 0.072672524 | 4.045 | 1 |
| 1906 | JAK1    | ENST00000342505 | p.R997W            | c.2989      | Unclassified                                                                   | 0.112611719 | 3.743 | 1 |
| 1906 | JAK1    | ENST00000342505 | p.Y933F            | c.2798      | Unclassified                                                                   | 0.035894745 | 8.647 | 1 |
| 1906 | JAK1    | ENST00000342505 | p.L932R            | c.2795      | Unclassified                                                                   | 0.137762122 | 0     | 1 |
| 2093 | SPOP    | ENST00000393331 | p.K262N            | c.786       | BTB (POZ) domain containing                                                    | 0.113833729 | 0     | 1 |
| 2093 | SPOP    | ENST00000393331 | p.D188A            | c.563       | BTB (POZ) domain containing                                                    | 0.113833729 | 3.135 | 1 |
| 2139 | ERBB2   | ENST00000269571 | p.D821Y            | c.2461      | CD molecules  Receptor Tyrosine Kinases  minor histocompatibility antigens     | 0.016042024 | 6.962 | 1 |
| 2139 | ERBB2   | ENST00000269571 | p.M916I            | c.2748      | CD molecules  Receptor Tyrosine Kinases  minor histocompatibility antigens     | 1.008021012 | 0     | 2 |
| 2157 | PPP2R1A | ENST00000322088 | p.L466M            | c.1396      | Protein phosphatase 2 regulatory subunits                                      | 0.010416396 | 6.585 | 1 |
| 2157 | PPP2R1A | ENST00000322088 | p.I505T            | c.1514      | Protein phosphatase 2 regulatory subunits                                      | 0.010416396 | 0     | 1 |
| 2172 | PIK3CA  | ENST00000263967 | p.E737K            | c.2209      | Phosphatidylinositol 3-kinase subunits                                         | 0.016322434 | 5.937 | 1 |
| 2172 | PIK3CA  | ENST00000263967 | p.L766F            | c.2296      | Phosphatidylinositol 3-kinase subunits                                         | 0.016322434 | 0     | 1 |
| 2405 | FGFR2   | ENST00000457416 | p.L618F            | c.1854      | CD molecules  I-set domain containing  Receptor Tyrosine Kinases               | 0.037452413 | 0     | 1 |
| 2405 | FGFR2   | ENST00000457416 | p.H545Q            | c.1635      | CD molecules  I-set domain containing  Receptor Tyrosine Kinases               | 0.024647607 | 6.028 | 1 |
| 2405 | FGFR2   | ENST00000457416 | p.M538I            | c.1614      | CD molecules  I-set domain containing  Receptor Tyrosine Kinases               | 0.022127741 | 5.498 | 1 |
| 2429 | FGFR2   | ENST00000457416 | p.R665W            | c.1993      | CD molecules  I-set domain containing  Receptor Tyrosine Kinases               | 1.035412975 | 8.094 | 2 |
| 2429 | FGFR2   | ENST00000457416 | p.K660N            | c.1980      | CD molecules  I-set domain containing  Receptor Tyrosine Kinases               | 2.158248129 | 0     | 1 |
| 2429 | FGFR2   | ENST00000457416 | p.K660E            | c.1978      | CD molecules  I-set domain containing  Receptor Tyrosine Kinases               | 2.158248129 | 0     | 2 |
| 2429 | FGFR2   | ENST00000457416 | p.D656G            | c.1967      | CD molecules  I-set domain containing  Receptor Tyrosine Kinases               | 0.077459796 | 9.777 | 1 |
| 2429 | FGFR2   | ENST00000457416 | p.R626Q            | c.1877      | CD molecules  I-set domain containing  Receptor Tyrosine Kinases               | 0.505842144 | 2.739 | 1 |
| 2436 | PPP2R1A | ENST00000322088 | p.R498H            | c.1493      | Protein phosphatase 2 regulatory subunits                                      | 0.184539301 | 2.438 | 1 |
| 2436 | PPP2R1A | ENST00000322088 | p.D531H            | c.1591      | Protein phosphatase 2 regulatory subunits                                      | 0.184539301 | 0     | 1 |
| 2515 | CSF1R   | ENST00000286301 | p.Y360C            | c.1079      | CD molecules  Immunoglobulin-like domain containing  Receptor Tyrosine Kinases | 0.09460002  | 3.528 | 1 |
| 2515 | CSF1R   | ENST00000286301 | p.V325M            | c.973       | CD molecules  Immunoglobulin-like domain containing  Receptor Tyrosine Kinases | 0.177941436 | 0     | 1 |
| 2515 | CSF1R   | ENST00000286301 | p.N302H            | c.904       | CD molecules  Immunoglobulin-like domain containing  Receptor Tyrosine Kinases | 0.099162585 | 3.454 | 1 |
| 2562 | JAK3    | ENST00000458235 | p.R1085Q           | c.3254      | Unclassified                                                                   | 0.01025165  | 6.608 | 1 |
| 2562 | JAK3    | ENST00000458235 | p.C1077F           | c.3230      | Unclassified                                                                   | 0.01945116  | 5.684 | 1 |
| 2562 | JAK3    | ENST00000458235 | p.S1012R           | c.3036      | Unclassified                                                                   | 0.02970281  | 0     | 1 |
| 2587 | MET     | ENST00000318493 | p.A361in_frame_del | c.1081_1083 | Receptor Tyrosine Kinases                                                      | 0.136117973 | 6.203 | 1 |
| 2587 | MET     | ENST00000318493 | p.L429V            | c.1285      | Receptor Tyrosine Kinases                                                      | 0.358104846 | 3.005 | 1 |
| 2587 | MET     | ENST00000318493 | p.R469Q            | c.1406      | Receptor Tyrosine Kinases                                                      | 1.138141629 | 0     | 2 |
| 2619 | KRAS    | ENST00000256078 | p.R164Q            | c.491       | RAS type family GTPases                                                        | 0.253625192 | 0     | 1 |
| 2619 | KRAS    | ENST00000256078 | p.R135T            | c.404       | RAS type family GTPases                                                        | 0.23585079  | 2.117 | 1 |
| 2619 | KRAS    | ENST00000256078 | p.P110S            | c.328       | RAS type family GTPases                                                        | 0.028424423 | 5.436 | 1 |
| 2873 | ABL1    | ENST00000372348 | p.M370T            | c.1109      | SH2 domain containing                                                          | 0.162423464 | 4.672 | 1 |

|      |         |                 |                       |             |                                                                              |             |       |   |
|------|---------|-----------------|-----------------------|-------------|------------------------------------------------------------------------------|-------------|-------|---|
| 2873 | ABL1    | ENST00000372348 | p.E472K               | c.1414      | SH2 domain containing                                                        | 1.042521121 | 0     | 1 |
| 2873 | ABL1    | ENST00000372348 | p.E472Q               | c.1414      | SH2 domain containing                                                        | 1.042521121 | 0     | 1 |
| 2873 | ABL1    | ENST00000372348 | p.K473in_frame_del    | c.1415_1417 | SH2 domain containing                                                        | 0.090556707 | 8.246 | 1 |
| 2894 | AR      | ENST00000374690 | p.L729I               | c.2185      | Nuclear hormone receptors                                                    | 0.163129963 | 0     | 1 |
| 2894 | AR      | ENST00000374690 | p.F814V               | c.2440      | Nuclear hormone receptors                                                    | 0.076147675 | 3.844 | 1 |
| 2894 | AR      | ENST00000374690 | p.F828L               | c.2482      | Nuclear hormone receptors                                                    | 0.100003432 | 3.419 | 1 |
| 2902 | DNMT1   | ENST00000359526 | p.V1359M              | c.4075      | Zinc fingers, CXXC-type                                                      | 0.057193698 | 0     | 1 |
| 2902 | DNMT1   | ENST00000359526 | p.F1312L              | c.3934      | Zinc fingers, CXXC-type                                                      | 0.057193698 | 4.128 | 1 |
| 2951 | AKT1    | ENST00000407796 | p.T211I               | c.632       | Pleckstrin homology domain containing                                        | 0.04531283  | 4.524 | 1 |
| 2951 | AKT1    | ENST00000407796 | p.V201I               | c.601       | Pleckstrin homology domain containing                                        | 0.044359358 | 4.556 | 1 |
| 2951 | AKT1    | ENST00000407796 | p.W80R                | c.238       | Pleckstrin homology domain containing                                        | 0.085976651 | 0     | 1 |
| 2960 | KIT     | ENST00000288135 | p.P37A                | c.109       | CD molecules Immunoglobulin-like domain containing Receptor Tyrosine Kinases | 0.009813612 | 6.671 | 1 |
| 2960 | KIT     | ENST00000288135 | p.V64G                | c.191       | CD molecules Immunoglobulin-like domain containing Receptor Tyrosine Kinases | 0.011694711 | 6.418 | 1 |
| 2960 | KIT     | ENST00000288135 | p.G102S               | c.304       | CD molecules Immunoglobulin-like domain containing Receptor Tyrosine Kinases | 0.021508323 | 0     | 1 |
| 3004 | EGFR    | ENST00000275493 | p.D807H               | c.2419      | Receptor Tyrosine Kinases                                                    | 0.187811346 | 4.588 | 1 |
| 3004 | EGFR    | ENST00000275493 | p.S811C               | c.2432      | Receptor Tyrosine Kinases                                                    | 0.184832466 | 6.115 | 1 |
| 3004 | EGFR    | ENST00000275493 | p.I981F               | c.2941      | Receptor Tyrosine Kinases                                                    | 0.242075781 | 8.037 | 1 |
| 3004 | EGFR    | ENST00000275493 | p.G983R               | c.2947      | Receptor Tyrosine Kinases                                                    | 1.059814223 | 0     | 2 |
| 3018 | ALK     | ENST00000389048 | p.FGM1271in_frame_del | c.3818_3813 | CD molecules Receptor Tyrosine Kinases                                       | 0.102592701 | 3.285 | 1 |
| 3018 | ALK     | ENST00000389048 | p.F1174L              | c.3520      | CD molecules Receptor Tyrosine Kinases                                       | 0.102592701 | 0     | 1 |
| 3050 | DNMT3A  | ENST00000321117 | p.F336V               | c.1006      | Unclassified                                                                 | 0.022815987 | 0     | 1 |
| 3050 | DNMT3A  | ENST00000321117 | p.S312F               | c.935       | Unclassified                                                                 | 0.014407861 | 6.117 | 1 |
| 3050 | DNMT3A  | ENST00000321117 | p.L300P               | c.899       | Unclassified                                                                 | 0.01165665  | 6.894 | 1 |
| 3073 | FGFR2   | ENST00000457416 | p.S220C               | c.658       | CD molecules I-set domain containing Receptor Tyrosine Kinases               | 0.097665985 | 3.356 | 1 |
| 3073 | FGFR2   | ENST00000457416 | p.T174N               | c.521       | CD molecules I-set domain containing Receptor Tyrosine Kinases               | 0.097665985 | 0     | 1 |
| 3115 | EGFR    | ENST00000275493 | p.P373Q               | c.1118      | Receptor Tyrosine Kinases                                                    | 0.012015163 | 6.379 | 1 |
| 3115 | EGFR    | ENST00000275493 | p.V441I               | c.1321      | Receptor Tyrosine Kinases                                                    | 0.076629584 | 0     | 1 |
| 3115 | EGFR    | ENST00000275493 | p.G465R               | c.1393      | Receptor Tyrosine Kinases                                                    | 0.064614421 | 3.952 | 1 |
| 3148 | DNMT3A  | ENST00000321117 | p.M585L               | c.1753      | Unclassified                                                                 | 0.073256929 | 3.818 | 1 |
| 3148 | DNMT3A  | ENST00000321117 | p.R556M               | c.1667      | Unclassified                                                                 | 0.104095942 | 0     | 1 |
| 3148 | DNMT3A  | ENST00000321117 | p.Y533C               | c.1598      | Unclassified                                                                 | 0.035545936 | 4.913 | 1 |
| 3174 | CSF1R   | ENST00000286301 | p.F293C               | c.878       | CD molecules Immunoglobulin-like domain containing Receptor Tyrosine Kinases | 0.011973593 | 6.384 | 1 |
| 3174 | CSF1R   | ENST00000286301 | p.L263F               | c.787       | CD molecules Immunoglobulin-like domain containing Receptor Tyrosine Kinases | 0.011973593 | 0     | 1 |
| 3290 | FGFR2   | ENST00000457416 | p.P709S               | c.2125      | CD molecules I-set domain containing Receptor Tyrosine Kinases               | 0.056916865 | 5.135 | 1 |
| 3290 | FGFR2   | ENST00000457416 | p.L561F               | c.1681      | CD molecules I-set domain containing Receptor Tyrosine Kinases               | 1.028458432 | 0     | 2 |
| 3339 | FLT3    | ENST00000380982 | p.P896L               | c.2687      | CD molecules Immunoglobulin-like domain containing Receptor Tyrosine Kinases | 1.004802496 | 0     | 2 |
| 3339 | FLT3    | ENST00000380982 | p.V843A               | c.2528      | CD molecules Immunoglobulin-like domain containing Receptor Tyrosine Kinases | 0.017565079 | 7.702 | 1 |
| 3347 | EZH2    | ENST00000320356 | p.R690H               | c.2069      | Lysine (K)-specific methyltransferases SANT/Myb domain containing            | 0.229086207 | 3.711 | 1 |
| 3347 | EZH2    | ENST00000320356 | p.Y646F               | c.1938_1937 | Lysine (K)-specific methyltransferases SANT/Myb domain containing            | 2.076362069 | 0     | 1 |
| 3347 | EZH2    | ENST00000320356 | p.Y646N               | c.1936      | Lysine (K)-specific methyltransferases SANT/Myb domain containing            | 2.076362069 | 0     | 2 |
| 3445 | ALK     | ENST00000389048 | p.L1318M              | c.3952      | CD molecules Receptor Tyrosine Kinases                                       | 0.017301009 | 0     | 1 |
| 3445 | ALK     | ENST00000389048 | p.R1253T              | c.3758      | CD molecules Receptor Tyrosine Kinases                                       | 0.017301009 | 5.853 | 1 |
| 3465 | RET     | ENST00000355710 | p.R205G               | c.613       | Cadherin-related Receptor Tyrosine Kinases                                   | 0.040023746 | 4.643 | 1 |
| 3465 | RET     | ENST00000355710 | p.M255I               | c.765       | Cadherin-related Receptor Tyrosine Kinases                                   | 0.040023746 | 0     | 1 |
| 3585 | ALK     | ENST00000389048 | p.S1308Y              | c.3923      | CD molecules Receptor Tyrosine Kinases                                       | 0.017985773 | 0     | 1 |
| 3585 | ALK     | ENST00000389048 | p.E1242K              | c.3724      | CD molecules Receptor Tyrosine Kinases                                       | 0.017985773 | 5.797 | 1 |
| 3607 | JAK1    | ENST00000342505 | p.L1153F              | c.3459      | Unclassified                                                                 | 0.010731533 | 0     | 1 |
| 3607 | JAK1    | ENST00000342505 | p.Q980L               | c.2939      | Unclassified                                                                 | 0.010731533 | 6.542 | 1 |
| 3648 | DNMT3A  | ENST00000321117 | p.P804S               | c.2410      | Unclassified                                                                 | 0.029666941 | 5.075 | 1 |
| 3648 | DNMT3A  | ENST00000321117 | p.R803S               | c.2409      | Unclassified                                                                 | 0.022143084 | 5.497 | 1 |
| 3648 | DNMT3A  | ENST00000321117 | p.D781G               | c.2342      | Unclassified                                                                 | 0.051810026 | 0     | 1 |
| 3729 | PPP2R1A | ENST00000322088 | p.Q372L               | c.1115      | Protein phosphatase 2 regulatory subunits                                    | 0.066201146 | 0     | 1 |
| 3729 | PPP2R1A | ENST00000322088 | p.P406R               | c.1217      | Protein phosphatase 2 regulatory subunits                                    | 0.066201146 | 3.917 | 1 |
| 3837 | CSF1R   | ENST00000286301 | p.H165Y               | c.493       | CD molecules Immunoglobulin-like domain containing Receptor Tyrosine Kinases | 0.030926771 | 5.015 | 1 |
| 3837 | CSF1R   | ENST00000286301 | p.A123T               | c.367       | CD molecules Immunoglobulin-like domain containing Receptor Tyrosine Kinases | 0.030926771 | 0     | 1 |
| 3945 | IDH2    | ENST00000330062 | p.A370T               | c.1108      | Unclassified                                                                 | 0.034866854 | 4.842 | 1 |
| 3945 | IDH2    | ENST00000330062 | p.T331M               | c.992       | Unclassified                                                                 | 0.034866854 | 0     | 1 |

|      |         |                 |          |             |                                                                              |             |       |    |
|------|---------|-----------------|----------|-------------|------------------------------------------------------------------------------|-------------|-------|----|
| 3974 | CSF1R   | ENST00000286301 | p.A767V  | c.2300      | CD molecules Immunoglobulin-like domain containing Receptor Tyrosine Kinases | 0.041607863 | 4.587 | 1  |
| 3974 | CSF1R   | ENST00000286301 | p.E557D  | c.1671      | CD molecules Immunoglobulin-like domain containing Receptor Tyrosine Kinases | 0.041607863 | 0     | 1  |
| 3996 | MAP2K1  | ENST00000307102 | p.D67N   | c.199       | Mitogen-activated protein kinase kinases                                     | 0.010941846 | 6.514 | 1  |
| 3996 | MAP2K1  | ENST00000307102 | p.R96K   | c.287       | Mitogen-activated protein kinase kinases                                     | 0.010941846 | 0     | 1  |
| 4048 | MET     | ENST00000318493 | p.D1198Y | c.3592      | Receptor Tyrosine Kinases                                                    | 0.015887104 | 6.976 | 1  |
| 4048 | MET     | ENST00000318493 | p.R1297I | c.3890      | Receptor Tyrosine Kinases                                                    | 1.018075111 | 0     | 1  |
| 4048 | MET     | ENST00000318493 | p.R1297K | c.3890      | Receptor Tyrosine Kinases                                                    | 1.018075111 | 0     | 1  |
| 4048 | MET     | ENST00000318493 | p.Y1374C | c.4121      | Receptor Tyrosine Kinases                                                    | 0.020263118 | 6.625 | 1  |
| 4112 | FLT3    | ENST00000380982 | p.E883K  | c.2647      | CD molecules Immunoglobulin-like domain containing Receptor Tyrosine Kinases | 1.254193668 | 2.976 | 2  |
| 4112 | FLT3    | ENST00000380982 | p.A814V  | c.2441      | CD molecules Immunoglobulin-like domain containing Receptor Tyrosine Kinases | 1.254193668 | 0     | 1  |
| 4112 | FLT3    | ENST00000380982 | p.A814T  | c.2440      | CD molecules Immunoglobulin-like domain containing Receptor Tyrosine Kinases | 1.254193668 | 0     | 1  |
| 4130 | CTNNB1  | ENST00000349496 | p.G367V  | c.1100      | Armadillo repeat containing                                                  | 0.007031265 | 7.152 | 1  |
| 4130 | CTNNB1  | ENST00000349496 | p.L402F  | c.1204      | Armadillo repeat containing                                                  | 0.007031265 | 0     | 1  |
| 4194 | DNMT1   | ENST00000359526 | p.R1305H | c.3914      | Zinc fingers, CXXC-type                                                      | 0.121748806 | 0     | 1  |
| 4194 | DNMT1   | ENST00000359526 | p.D875N  | c.2623      | Zinc fingers, CXXC-type                                                      | 0.037718582 | 4.849 | 1  |
| 4194 | DNMT1   | ENST00000359526 | p.P867S  | c.2599      | Zinc fingers, CXXC-type                                                      | 0.090071211 | 3.522 | 1  |
| 4257 | JAK3    | ENST00000458235 | p.G969V  | c.2906      | Unclassified                                                                 | 0.0093294   | 6.744 | 1  |
| 4257 | JAK3    | ENST00000458235 | p.R866M  | c.2597      | Unclassified                                                                 | 0.0093294   | 0     | 1  |
| 4292 | CTNNB1  | ENST00000349496 | p.K354T  | c.1061      | Armadillo repeat containing                                                  | 0.130695575 | 2.963 | 1  |
| 4292 | CTNNB1  | ENST00000349496 | p.N387K  | c.1161      | Armadillo repeat containing                                                  | 0.147337785 | 0     | 1  |
| 4292 | CTNNB1  | ENST00000349496 | p.N426D  | c.1276      | Armadillo repeat containing                                                  | 0.021538824 | 5.711 | 1  |
| 4341 | KRAS    | ENST00000256078 | p.D132G  | c.395       | RAS type family GTPases                                                      | 0.035133716 | 4.831 | 1  |
| 4341 | KRAS    | ENST00000256078 | p.K5E    | c.13        | RAS type family GTPases                                                      | 0.035133716 | 0     | 1  |
| 4400 | DNMT3A  | ENST00000321117 | p.R882H  | c.2645      | Unclassified                                                                 | 22.07823728 | 0     | 23 |
| 4400 | DNMT3A  | ENST00000321117 | p.K680R  | c.2039      | Unclassified                                                                 | 1.799457409 | 3.676 | 1  |
| 4495 | PPP2R1A | ENST00000322088 | p.A232T  | c.694       | Protein phosphatase 2 regulatory subunits                                    | 0.11426469  | 3.149 | 1  |
| 4495 | PPP2R1A | ENST00000322088 | p.Q237R  | c.710       | Protein phosphatase 2 regulatory subunits                                    | 0.015104365 | 6.203 | 1  |
| 4495 | PPP2R1A | ENST00000322088 | p.A273V  | c.818       | Protein phosphatase 2 regulatory subunits                                    | 0.126308519 | 0     | 1  |
| 4496 | EGFR    | ENST00000275493 | p.I475V  | c.1423      | Receptor Tyrosine Kinases                                                    | 0.027093405 | 0     | 1  |
| 4496 | EGFR    | ENST00000275493 | p.G503C  | c.1507      | Receptor Tyrosine Kinases                                                    | 0.011800567 | 6.405 | 1  |
| 4496 | EGFR    | ENST00000275493 | p.P512S  | c.1534      | Receptor Tyrosine Kinases                                                    | 0.015292838 | 6.031 | 1  |
| 4508 | DNMT1   | ENST00000359526 | p.D599N  | c.1795      | Zinc fingers, CXXC-type                                                      | 0.04744069  | 6.495 | 1  |
| 4508 | DNMT1   | ENST00000359526 | p.E448K  | c.1342      | Zinc fingers, CXXC-type                                                      | 2.011086901 | 0     | 3  |
| 4541 | ABL1    | ENST00000372348 | p.D400Y  | c.1198      | SH2 domain containing                                                        | 0.138384077 | 2.906 | 1  |
| 4541 | ABL1    | ENST00000372348 | p.F401L  | c.1203      | SH2 domain containing                                                        | 0.042208491 | 4.747 | 1  |
| 4541 | ABL1    | ENST00000372348 | p.Y459H  | c.1375      | SH2 domain containing                                                        | 0.170655748 | 0     | 1  |
| 4574 | ABL1    | ENST00000372348 | p.F91V   | c.271       | SH2 domain containing                                                        | 1.181872585 | 0     | 2  |
| 4574 | ABL1    | ENST00000372348 | p.V130L  | c.388       | SH2 domain containing                                                        | 0.363745171 | 2.459 | 1  |
| 4733 | RET     | ENST00000355710 | p.G823E  | c.2468      | Cadherin-related Receptor Tyrosine Kinases                                   | 0.092333629 | 0     | 1  |
| 4733 | RET     | ENST00000355710 | p.R844Q  | c.2531      | Cadherin-related Receptor Tyrosine Kinases                                   | 0.092333629 | 3.437 | 1  |
| 4734 | MET     | ENST00000318493 | p.V1110I | c.3328      | Receptor Tyrosine Kinases                                                    | 0.017062821 | 5.873 | 1  |
| 4734 | MET     | ENST00000318493 | p.D1246H | c.3736      | Receptor Tyrosine Kinases                                                    | 0.017062821 | 0     | 1  |
| 4753 | KIT     | ENST00000288135 | p.F772V  | c.2314      | CD molecules Immunoglobulin-like domain containing Receptor Tyrosine Kinases | 0.190386092 | 0     | 1  |
| 4753 | KIT     | ENST00000288135 | p.R804W  | c.2410      | CD molecules Immunoglobulin-like domain containing Receptor Tyrosine Kinases | 0.190386092 | 2.393 | 1  |
| 4857 | RET     | ENST00000355710 | p.R813W  | c.2437      | Cadherin-related Receptor Tyrosine Kinases                                   | 0.079109787 | 4.66  | 1  |
| 4857 | RET     | ENST00000355710 | p.R912L  | c.2735      | Cadherin-related Receptor Tyrosine Kinases                                   | 1.039554894 | 0     | 1  |
| 4857 | RET     | ENST00000355710 | p.R912Q  | c.2735      | Cadherin-related Receptor Tyrosine Kinases                                   | 1.039554894 | 0     | 1  |
| 4932 | IDH2    | ENST00000330062 | p.R172S  | c.516       | Unclassified                                                                 | 9.380103138 | 5.483 | 2  |
| 4932 | IDH2    | ENST00000330062 | p.R172K  | c.515       | Unclassified                                                                 | 9.380103138 | 5.483 | 7  |
| 4932 | IDH2    | ENST00000330062 | p.R172M  | c.515       | Unclassified                                                                 | 9.380103138 | 5.483 | 1  |
| 4932 | IDH2    | ENST00000330062 | p.R140L  | c.419       | Unclassified                                                                 | 16.22359008 | 0     | 1  |
| 4932 | IDH2    | ENST00000330062 | p.R140Q  | c.419       | Unclassified                                                                 | 16.22359008 | 0     | 15 |
| 4932 | IDH2    | ENST00000330062 | p.R140W  | c.418       | Unclassified                                                                 | 16.22359008 | 0     | 1  |
| 5007 | EGFR    | ENST00000275493 | p.E160K  | c.478       | Receptor Tyrosine Kinases                                                    | 0.01551707  | 6.01  | 1  |
| 5007 | EGFR    | ENST00000275493 | p.S198R  | c.594       | Receptor Tyrosine Kinases                                                    | 0.01551707  | 0     | 1  |
| 5030 | MDM2    | ENST00000462284 | p.R422I  | c.1265_1266 | Zinc fingers, RAN binding-type                                               | 0.021123607 | 0     | 1  |
| 5030 | MDM2    | ENST00000462284 | p.I446V  | c.1336      | Zinc fingers, RAN binding-type                                               | 0.021123607 | 5.565 | 1  |

|      |         |                 |         |        |                                                                              |             |       |   |
|------|---------|-----------------|---------|--------|------------------------------------------------------------------------------|-------------|-------|---|
| 5035 | KIT     | ENST00000288135 | p.A219V | c.656  | CD molecules Immunoglobulin-like domain containing Receptor Tyrosine Kinases | 0.062847536 | 0     | 1 |
| 5035 | KIT     | ENST00000288135 | p.T302I | c.905  | CD molecules Immunoglobulin-like domain containing Receptor Tyrosine Kinases | 0.062847536 | 3.992 | 1 |
| 5041 | SKP2    | ENST00000274255 | p.H199N | c.595  | F-box and leucine-rich repeat proteins                                       | 0.147265435 | 9.489 | 1 |
| 5041 | SKP2    | ENST00000274255 | p.G200C | c.598  | F-box and leucine-rich repeat proteins                                       | 2.011117218 | 0     | 1 |
| 5041 | SKP2    | ENST00000274255 | p.G200D | c.599  | F-box and leucine-rich repeat proteins                                       | 2.011117218 | 0     | 2 |
| 5041 | SKP2    | ENST00000274255 | p.T225I | c.674  | F-box and leucine-rich repeat proteins                                       | 0.17226726  | 6.684 | 1 |
| 5048 | PPP2R1A | ENST00000322088 | p.M291K | c.872  | Protein phosphatase 2 regulatory subunits                                    | 0.117603263 | 0     | 1 |
| 5048 | PPP2R1A | ENST00000322088 | p.C329F | c.986  | Protein phosphatase 2 regulatory subunits                                    | 0.117603263 | 3.088 | 1 |
| 5126 | ERBB2   | ENST00000269571 | p.V94I  | c.280  | CD molecules Receptor Tyrosine Kinases minor histocompatibility antigens     | 0.011957006 | 6.386 | 1 |
| 5126 | ERBB2   | ENST00000269571 | p.R138W | c.412  | CD molecules Receptor Tyrosine Kinases minor histocompatibility antigens     | 0.011957006 | 0     | 1 |
| 5214 | EGFR    | ENST00000275493 | p.G331R | c.991  | Receptor Tyrosine Kinases                                                    | 0.014219357 | 6.136 | 1 |
| 5214 | EGFR    | ENST00000275493 | p.T363I | c.1088 | Receptor Tyrosine Kinases                                                    | 0.014219357 | 0     | 1 |
| 5450 | KIT     | ENST00000288135 | p.Y418S | c.1253 | CD molecules Immunoglobulin-like domain containing Receptor Tyrosine Kinases | 0.061341191 | 0     | 1 |
| 5450 | KIT     | ENST00000288135 | p.E490D | c.1470 | CD molecules Immunoglobulin-like domain containing Receptor Tyrosine Kinases | 0.061341191 | 4.027 | 1 |
| 5551 | DNMT3A  | ENST00000321117 | p.R729Q | c.2186 | Unclassified                                                                 | 2.003513197 | 0     | 2 |
| 5551 | DNMT3A  | ENST00000321117 | p.R729W | c.2185 | Unclassified                                                                 | 2.003513197 | 0     | 1 |
| 5551 | DNMT3A  | ENST00000321117 | p.G685E | c.2054 | Unclassified                                                                 | 0.01053959  | 8.153 | 1 |
| 5648 | PTPN11  | ENST00000351677 | p.H114Y | c.340  | Protein tyrosine phosphatases, non-receptor type SH2 domain containing       | 1.093934419 | 0     | 2 |
| 5648 | PTPN11  | ENST00000351677 | p.L136H | c.407  | Protein tyrosine phosphatases, non-receptor type SH2 domain containing       | 0.202004281 | 3.437 | 1 |
| 5648 | PTPN11  | ENST00000351677 | p.Q214K | c.640  | Protein tyrosine phosphatases, non-receptor type SH2 domain containing       | 0.020538603 | 9.287 | 1 |
| 5734 | MET     | ENST00000318493 | p.S525Y | c.1574 | Receptor Tyrosine Kinases                                                    | 0.106137031 | 3.236 | 1 |
| 5734 | MET     | ENST00000318493 | p.T618M | c.1853 | Receptor Tyrosine Kinases                                                    | 0.106137031 | 0     | 1 |
| 5742 | JAK2    | ENST00000539801 | p.W737L | c.2210 | SH2 domain containing                                                        | 0.026941986 | 5.214 | 1 |
| 5742 | JAK2    | ENST00000539801 | p.H770L | c.2309 | SH2 domain containing                                                        | 0.026941986 | 0     | 1 |
| 5835 | FLT3    | ENST00000380982 | p.E415K | c.1243 | CD molecules Immunoglobulin-like domain containing Receptor Tyrosine Kinases | 0.00841979  | 6.892 | 1 |
| 5835 | FLT3    | ENST00000380982 | p.R387Q | c.1160 | CD molecules Immunoglobulin-like domain containing Receptor Tyrosine Kinases | 0.00841979  | 0     | 1 |

**Supplementary Table 8. Tumor suppressor intra-molecular clusters with protein domain annotation**

| Cluster ID | Gene | Transcript (Ensembl74) | HGVS Protein Annotation | HGVS Coding Position | Pfam Protein Domain             | Closeness Centrality | Geodesic From Centroid | No. Patient Samples |
|------------|------|------------------------|-------------------------|----------------------|---------------------------------|----------------------|------------------------|---------------------|
| 7          | ATRX | ENST00000373344        | p.Y266N                 | c.796                | PHD-type; atypical.             | 0.239483805          | 0                      | 1                   |
| 7          | ATRX | ENST00000373344        | p.C220W                 | c.660                | PHD-type; atypical.             | 0.239483805          | 2.062                  | 1                   |
| 11         | TP53 | ENST00000445888        | p.E286A                 | c.857                | Interaction with E4F1           | 18.25668213          | 7.448                  | 1                   |
| 11         | TP53 | ENST00000445888        | p.E286G                 | c.857                | Interaction with E4F1           | 18.25668213          | 7.448                  | 3                   |
| 11         | TP53 | ENST00000445888        | p.E286V                 | c.857                | Interaction with E4F1           | 18.25668213          | 7.448                  | 1                   |
| 11         | TP53 | ENST00000445888        | p.E286K                 | c.856                | Interaction with E4F1           | 18.25668213          | 7.448                  | 6                   |
| 11         | TP53 | ENST00000445888        | p.E286Q                 | c.856                | Interaction with E4F1           | 18.25668213          | 7.448                  | 1                   |
| 11         | TP53 | ENST00000445888        | p.E285K                 | c.853                | Interaction with E4F1 NULL      | 21.63403254          | 4.973                  | 7                   |
| 11         | TP53 | ENST00000445888        | p.T284P                 | c.850                | NULL T->E: Inhibits strongly it | 0.498748218          | 8.979                  | 1                   |
| 11         | TP53 | ENST00000445888        | p.R283P                 | c.848                | Interaction with E4F1           | 5.080017638          | 8.935                  | 3                   |
| 11         | TP53 | ENST00000445888        | p.R282Q                 | c.845                | Interaction with E4F1           | 37.5582261           | 6.317                  | 1                   |
| 11         | TP53 | ENST00000445888        | p.R282G                 | c.844                | Interaction with E4F1           | 37.5582261           | 6.317                  | 1                   |
| 11         | TP53 | ENST00000445888        | p.R282W                 | c.844                | Interaction with E4F1           | 37.5582261           | 6.317                  | 27                  |
| 11         | TP53 | ENST00000445888        | p.D281E                 | c.843                | Interaction with E4F1           | 14.6666203           | 6.654                  | 1                   |
| 11         | TP53 | ENST00000445888        | p.D281A                 | c.842                | Interaction with E4F1           | 14.6666203           | 6.654                  | 1                   |
| 11         | TP53 | ENST00000445888        | p.D281G                 | c.842                | Interaction with E4F1           | 14.6666203           | 6.654                  | 1                   |
| 11         | TP53 | ENST00000445888        | p.D281P                 | c.842_841            | Interaction with E4F1           | 14.6666203           | 6.654                  | 1                   |
| 11         | TP53 | ENST00000445888        | p.D281V                 | c.842                | Interaction with E4F1           | 14.6666203           | 6.654                  | 2                   |
| 11         | TP53 | ENST00000445888        | p.D281H                 | c.841                | Interaction with E4F1           | 14.6666203           | 6.654                  | 1                   |
| 11         | TP53 | ENST00000445888        | p.D281N                 | c.841                | Interaction with E4F1           | 14.6666203           | 6.654                  | 2                   |
| 11         | TP53 | ENST00000445888        | p.D281Y                 | c.841                | Interaction with E4F1           | 14.6666203           | 6.654                  | 4                   |
| 11         | TP53 | ENST00000445888        | p.R280S                 | c.840                | Interaction with DNA            | 16.06173724          | 9.403                  | 1                   |
| 11         | TP53 | ENST00000445888        | p.R280I                 | c.839                | Interaction with DNA            | 16.06173724          | 9.403                  | 3                   |
| 11         | TP53 | ENST00000445888        | p.R280K                 | c.839                | Interaction with DNA            | 16.06173724          | 9.403                  | 4                   |
| 11         | TP53 | ENST00000445888        | p.R280T                 | c.839                | Interaction with DNA            | 16.06173724          | 9.403                  | 4                   |
| 11         | TP53 | ENST00000445888        | p.R280G                 | c.838                | Interaction with DNA            | 16.06173724          | 9.403                  | 3                   |
| 11         | TP53 | ENST00000445888        | p.G279E                 | c.836                | Interaction with DNA            | 4.471111581          | 8.245                  | 2                   |
| 11         | TP53 | ENST00000445888        | p.VCACPG274in_frame_del | c.836_819            | Interaction with DNA            | 24.72897031          | 4.647                  | 1                   |
| 11         | TP53 | ENST00000445888        | p.G279R                 | c.835                | Interaction with DNA            | 4.471111581          | 8.245                  | 1                   |
| 11         | TP53 | ENST00000445888        | p.P278H                 | c.833                | Interaction with DNA            | 23.82425015          | 5.536                  | 2                   |
| 11         | TP53 | ENST00000445888        | p.P278L                 | c.833                | Interaction with DNA            | 23.82425015          | 5.536                  | 4                   |
| 11         | TP53 | ENST00000445888        | p.P278R                 | c.833                | Interaction with DNA            | 23.82425015          | 5.536                  | 3                   |
| 11         | TP53 | ENST00000445888        | p.P278A                 | c.832                | Interaction with DNA            | 23.82425015          | 5.536                  | 3                   |
| 11         | TP53 | ENST00000445888        | p.P278S                 | c.832                | Interaction with DNA            | 23.82425015          | 5.536                  | 4                   |
| 11         | TP53 | ENST00000445888        | p.P278T                 | c.832                | Interaction with DNA            | 23.82425015          | 5.536                  | 2                   |
| 11         | TP53 | ENST00000445888        | p.C277F                 | c.830                | Interaction with DNA            | 6.522796351          | 7.21                   | 4                   |
| 11         | TP53 | ENST00000445888        | p.A276P                 | c.826                | Interaction with DNA            | 7.810869531          | 6.777                  | 2                   |
| 11         | TP53 | ENST00000445888        | p.C275F                 | c.824                | Interaction with DNA            | 25.29930843          | 3.886                  | 4                   |
| 11         | TP53 | ENST00000445888        | p.C275Y                 | c.824                | Interaction with DNA            | 25.29930843          | 3.886                  | 5                   |
| 11         | TP53 | ENST00000445888        | p.V274D                 | c.821                | Interaction with DNA            | 24.72897031          | 4.647                  | 1                   |
| 11         | TP53 | ENST00000445888        | p.V274G                 | c.821                | Interaction with DNA            | 24.72897031          | 4.647                  | 1                   |
| 11         | TP53 | ENST00000445888        | p.V274F                 | c.820                | Interaction with DNA            | 24.72897031          | 4.647                  | 2                   |
| 11         | TP53 | ENST00000445888        | p.V274L                 | c.820                | Interaction with DNA            | 24.72897031          | 4.647                  | 1                   |
| 11         | TP53 | ENST00000445888        | p.R273H                 | c.818                | Interaction with DNA NULL       | 133.2808656          | 0                      | 49                  |
| 11         | TP53 | ENST00000445888        | p.R273L                 | c.818                | Interaction with DNA NULL       | 133.2808656          | 0                      | 9                   |
| 11         | TP53 | ENST00000445888        | p.R273P                 | c.818                | Interaction with DNA NULL       | 133.2808656          | 0                      | 3                   |
| 11         | TP53 | ENST00000445888        | p.R273C                 | c.817                | Interaction with DNA NULL       | 133.2808656          | 0                      | 55                  |
| 11         | TP53 | ENST00000445888        | p.R273S                 | c.817                | Interaction with DNA NULL       | 133.2808656          | 0                      | 3                   |
| 11         | TP53 | ENST00000445888        | p.V272G                 | c.815                | Interaction with E4F1           | 19.68404124          | 5.011                  | 1                   |
| 11         | TP53 | ENST00000445888        | p.V272M                 | c.814                | Interaction with E4F1           | 19.68404124          | 5.011                  | 7                   |
| 11         | TP53 | ENST00000445888        | p.E271V                 | c.812                | Interaction with E4F1           | 30.274455            | 3.559                  | 1                   |



|    |      |                 |                      |           |                                              |             |       |    |
|----|------|-----------------|----------------------|-----------|----------------------------------------------|-------------|-------|----|
| 11 | TP53 | ENST00000445888 | p.E271K              | c.811     | Interaction with E4F1                        | 30.274455   | 3.559 | 6  |
| 11 | TP53 | ENST00000445888 | p.F270C              | c.809     | Interaction with E4F1                        | 16.90879978 | 5.136 | 1  |
| 11 | TP53 | ENST00000445888 | p.F270S              | c.809     | Interaction with E4F1                        | 16.90879978 | 5.136 | 3  |
| 11 | TP53 | ENST00000445888 | p.F270I              | c.808     | Interaction with E4F1                        | 16.90879978 | 5.136 | 2  |
| 11 | TP53 | ENST00000445888 | p.F270L              | c.808     | Interaction with E4F1                        | 16.90879978 | 5.136 | 2  |
| 11 | TP53 | ENST00000445888 | p.LTI252in_frame_del | c.762_754 | Interaction with AXIN1.                      | 7.928998617 | 8.429 | 1  |
| 11 | TP53 | ENST00000445888 | p.L252in_frame_del   | c.756_754 | Interaction with AXIN1.                      | 7.928998617 | 8.429 | 1  |
| 11 | TP53 | ENST00000445888 | p.L252P              | c.755     | Interaction with AXIN1.                      | 7.928998617 | 8.429 | 1  |
| 11 | TP53 | ENST00000445888 | p.I251S              | c.752     | Interaction with AXIN1. NULL                 | 17.47192205 | 4.644 | 1  |
| 11 | TP53 | ENST00000445888 | p.I251F              | c.751     | Interaction with AXIN1. NULL                 | 17.47192205 | 4.644 | 1  |
| 11 | TP53 | ENST00000445888 | p.P250L              | c.750_749 | Interaction with AXIN1. NULL                 | 16.0390717  | 5.888 | 7  |
| 11 | TP53 | ENST00000445888 | p.R249S              | c.747     | Interaction with AXIN1. NULL                 | 30.65039501 | 8.464 | 6  |
| 11 | TP53 | ENST00000445888 | p.R249M              | c.746     | Interaction with AXIN1. NULL                 | 30.65039501 | 8.464 | 5  |
| 11 | TP53 | ENST00000445888 | p.R249T              | c.746     | Interaction with AXIN1. NULL                 | 30.65039501 | 8.464 | 1  |
| 11 | TP53 | ENST00000445888 | p.R249G              | c.745     | Interaction with AXIN1. NULL                 | 30.65039501 | 8.464 | 6  |
| 11 | TP53 | ENST00000445888 | p.R249W              | c.745     | Interaction with AXIN1. NULL                 | 30.65039501 | 8.464 | 2  |
| 11 | TP53 | ENST00000445888 | p.R248L              | c.743     | NULL R->S: Does not induce SNAI1 degradation | 101.8821061 | 4.363 | 2  |
| 11 | TP53 | ENST00000445888 | p.R248P              | c.743     | NULL R->S: Does not induce SNAI1 degradation | 101.8821061 | 4.363 | 3  |
| 11 | TP53 | ENST00000445888 | p.R248Q              | c.743     | NULL R->S: Does not induce SNAI1 degradation | 101.8821061 | 4.363 | 46 |
| 11 | TP53 | ENST00000445888 | p.R248G              | c.742     | NULL R->S: Does not induce SNAI1 degradation | 101.8821061 | 4.363 | 1  |
| 11 | TP53 | ENST00000445888 | p.R248W              | c.742_741 | NULL R->S: Does not induce SNAI1 degradation | 101.8821061 | 4.363 | 42 |
| 11 | TP53 | ENST00000445888 | p.M246I              | c.738     | Interacts with the 53BP2 SH3 domain NULL     | 15.91818977 | 6.068 | 1  |
| 11 | TP53 | ENST00000445888 | p.M246R              | c.737     | Interacts with the 53BP2 SH3 domain NULL     | 15.91818977 | 6.068 | 1  |
| 11 | TP53 | ENST00000445888 | p.N55239in_frame_del | c.723_715 | Interaction with AXIN1. NULL                 | 18.7919751  | 5.874 | 1  |
| 11 | TP53 | ENST00000445888 | p.S241C              | c.722     | Interacts with the 53BP2 SH3 domain NULL     | 21.03328261 | 4.99  | 3  |
| 11 | TP53 | ENST00000445888 | p.S241F              | c.722     | Interacts with the 53BP2 SH3 domain NULL     | 21.03328261 | 4.99  | 9  |
| 11 | TP53 | ENST00000445888 | p.S241Y              | c.722     | Interacts with the 53BP2 SH3 domain NULL     | 21.03328261 | 4.99  | 1  |
| 11 | TP53 | ENST00000445888 | p.S241P              | c.721     | Interacts with the 53BP2 SH3 domain NULL     | 21.03328261 | 4.99  | 1  |
| 11 | TP53 | ENST00000445888 | p.MCN237in_frame_del | c.718_710 | Interaction with AXIN1.                      | 40.93035981 | 9.361 | 1  |
| 11 | TP53 | ENST00000445888 | p.S240G              | c.718     | Interaction with AXIN1. NULL                 | 27.59976191 | 2.866 | 2  |
| 11 | TP53 | ENST00000445888 | p.N239S              | c.716     | Interaction with AXIN1. NULL                 | 18.7919751  | 5.874 | 4  |
| 11 | TP53 | ENST00000445888 | p.N239D              | c.715     | Interaction with AXIN1. NULL                 | 18.7919751  | 5.874 | 1  |
| 11 | TP53 | ENST00000445888 | p.C238F              | c.713     | NULL Zinc                                    | 48.43219353 | 6.467 | 9  |
| 11 | TP53 | ENST00000445888 | p.C238Y              | c.713     | NULL Zinc                                    | 48.43219353 | 6.467 | 8  |
| 11 | TP53 | ENST00000445888 | p.C238S              | c.712     | NULL Zinc                                    | 48.43219353 | 6.467 | 1  |
| 11 | TP53 | ENST00000445888 | p.M237I              | c.711     | Interaction with AXIN1.                      | 40.93035981 | 9.361 | 8  |
| 11 | TP53 | ENST00000445888 | p.M237K              | c.710     | Interaction with AXIN1.                      | 40.93035981 | 9.361 | 2  |
| 11 | TP53 | ENST00000445888 | p.M237V              | c.709     | Interaction with AXIN1.                      | 40.93035981 | 9.361 | 2  |
| 11 | TP53 | ENST00000445888 | p.Y236C              | c.707     | Interaction with AXIN1.                      | 26.53630716 | 4.729 | 7  |
| 11 | TP53 | ENST00000445888 | p.Y236D              | c.706     | Interaction with AXIN1.                      | 26.53630716 | 4.729 | 1  |
| 11 | TP53 | ENST00000445888 | p.Y234C              | c.701     | Interaction with AXIN1.                      | 27.75808273 | 7.599 | 10 |
| 11 | TP53 | ENST00000445888 | p.Y234S              | c.701     | Interaction with AXIN1.                      | 27.75808273 | 7.599 | 1  |
| 11 | TP53 | ENST00000445888 | p.Y234H              | c.700     | Interaction with AXIN1.                      | 27.75808273 | 7.599 | 1  |
| 11 | TP53 | ENST00000445888 | p.Y234N              | c.700     | Interaction with AXIN1.                      | 27.75808273 | 7.599 | 1  |
| 11 | TP53 | ENST00000445888 | p.R196P              | c.587     | Interaction with AXIN1.                      | 26.65042544 | 8.911 | 2  |
| 11 | TP53 | ENST00000445888 | p.I195M              | c.585     | Interaction with AXIN1.                      | 29.40683052 | 8.227 | 1  |
| 11 | TP53 | ENST00000445888 | p.I195N              | c.584     | Interaction with AXIN1.                      | 29.40683052 | 8.227 | 3  |
| 11 | TP53 | ENST00000445888 | p.I195S              | c.584     | Interaction with AXIN1.                      | 29.40683052 | 8.227 | 2  |
| 11 | TP53 | ENST00000445888 | p.I195T              | c.584     | Interaction with AXIN1.                      | 29.40683052 | 8.227 | 14 |
| 11 | TP53 | ENST00000445888 | p.I195F              | c.583     | Interaction with AXIN1.                      | 29.40683052 | 8.227 | 1  |
| 11 | TP53 | ENST00000445888 | p.L194H              | c.581     | Interaction with AXIN1.                      | 25.86379943 | 7.946 | 1  |
| 11 | TP53 | ENST00000445888 | p.L194P              | c.581     | Interaction with AXIN1.                      | 25.86379943 | 7.946 | 2  |
| 11 | TP53 | ENST00000445888 | p.L194R              | c.581     | Interaction with AXIN1.                      | 25.86379943 | 7.946 | 6  |

|    |      |                 |                        |           |                                       |             |       |    |
|----|------|-----------------|------------------------|-----------|---------------------------------------|-------------|-------|----|
| 11 | TP53 | ENST00000445888 | p.L194F                | c.580     | Interaction with AXIN1.               | 25.86379943 | 7.946 | 1  |
| 11 | TP53 | ENST00000445888 | p.R181P                | c.542     | BH2 Interaction with AXIN1. NULL      | 14.97347547 | 7.662 | 1  |
| 11 | TP53 | ENST00000445888 | p.H179Q                | c.537     | Zinc                                  | 42.12317148 | 9.337 | 2  |
| 11 | TP53 | ENST00000445888 | p.H179L                | c.536     | Zinc                                  | 42.12317148 | 9.337 | 2  |
| 11 | TP53 | ENST00000445888 | p.H179P                | c.536     | Zinc                                  | 42.12317148 | 9.337 | 1  |
| 11 | TP53 | ENST00000445888 | p.H179R                | c.536     | Zinc                                  | 42.12317148 | 9.337 | 19 |
| 11 | TP53 | ENST00000445888 | p.H179D                | c.535     | Zinc                                  | 42.12317148 | 9.337 | 1  |
| 11 | TP53 | ENST00000445888 | p.H179Y                | c.535     | Zinc                                  | 42.12317148 | 9.337 | 6  |
| 11 | TP53 | ENST00000445888 | p.C176F                | c.527     | NULL Zinc                             | 32.59544664 | 9.594 | 10 |
| 11 | TP53 | ENST00000445888 | p.C176S                | c.527     | NULL Zinc                             | 32.59544664 | 9.594 | 1  |
| 11 | TP53 | ENST00000445888 | p.C176Y                | c.527     | NULL Zinc                             | 32.59544664 | 9.594 | 9  |
| 11 | TP53 | ENST00000445888 | p.R175H                | c.524     | Interaction with AXIN1. NULL          | 87.61688858 | 8.539 | 63 |
| 11 | TP53 | ENST00000445888 | p.R175C                | c.523     | Interaction with AXIN1. NULL          | 87.61688858 | 8.539 | 4  |
| 11 | TP53 | ENST00000445888 | p.R175G                | c.523     | Interaction with AXIN1. NULL          | 87.61688858 | 8.539 | 4  |
| 11 | TP53 | ENST00000445888 | p.V173G                | c.518     | Gln-rich Interaction with AXIN1.      | 19.5856813  | 8.297 | 1  |
| 11 | TP53 | ENST00000445888 | p.V173L                | c.517     | Gln-rich Interaction with AXIN1.      | 19.5856813  | 8.297 | 7  |
| 11 | TP53 | ENST00000445888 | p.V173M                | c.517     | Gln-rich Interaction with AXIN1.      | 19.5856813  | 8.297 | 6  |
| 11 | TP53 | ENST00000445888 | p.H168L                | c.503     | Gln-rich Interaction with AXIN1. NULL | 28.12904525 | 7.829 | 2  |
| 11 | TP53 | ENST00000445888 | p.H168P                | c.503     | Gln-rich Interaction with AXIN1. NULL | 28.12904525 | 7.829 | 1  |
| 11 | TP53 | ENST00000445888 | p.H168R                | c.503     | Gln-rich Interaction with AXIN1. NULL | 28.12904525 | 7.829 | 1  |
| 11 | TP53 | ENST00000445888 | p.K164E                | c.490     | Gln-rich Interaction with AXIN1.      | 17.05551583 | 5.151 | 3  |
| 11 | TP53 | ENST00000445888 | p.Y163C                | c.488     | Gln-rich Interaction with AXIN1. NULL | 27.20029547 | 7.808 | 10 |
| 11 | TP53 | ENST00000445888 | p.IY162in_frame_delN   | c.487_485 | Gln-rich Interaction with AXIN1.      | 5.862388683 | 7.729 | 1  |
| 11 | TP53 | ENST00000445888 | p.Y163H                | c.487     | Gln-rich Interaction with AXIN1. NULL | 27.20029547 | 7.808 | 1  |
| 11 | TP53 | ENST00000445888 | p.Y163N                | c.487     | Gln-rich Interaction with AXIN1. NULL | 27.20029547 | 7.808 | 1  |
| 11 | TP53 | ENST00000445888 | p.A116in_frame_del     | c.486_481 | Interaction with AXIN1.               | 10.49216698 | 8.471 | 1  |
| 11 | TP53 | ENST00000445888 | p.A161T                | c.481     | Interaction with AXIN1.               | 10.49216698 | 8.471 | 3  |
| 11 | TP53 | ENST00000445888 | p.V143A                | c.428     | Interaction with AXIN1.               | 11.92536866 | 8.894 | 1  |
| 11 | TP53 | ENST00000445888 | p.V143E                | c.428     | Interaction with AXIN1.               | 11.92536866 | 8.894 | 1  |
| 11 | TP53 | ENST00000445888 | p.V143G                | c.428     | Interaction with AXIN1.               | 11.92536866 | 8.894 | 2  |
| 11 | TP53 | ENST00000445888 | p.V143M                | c.427     | Interaction with AXIN1.               | 11.92536866 | 8.894 | 2  |
| 11 | TP53 | ENST00000445888 | p.AKTCP138in_frame_del | c.425_411 | Interaction with AXIN1.               | 12.66526936 | 6.762 | 1  |
| 11 | TP53 | ENST00000445888 | p.KTCP139in_frame_del  | c.425_414 | Interaction with AXIN1.               | 9.582713075 | 7.722 | 1  |
| 11 | TP53 | ENST00000445888 | p.KTCP139in_frame_delT | c.424_416 | Interaction with AXIN1.               | 9.582713075 | 7.722 | 1  |
| 11 | TP53 | ENST00000445888 | p.C141W                | c.423     | Interaction with AXIN1.               | 19.96405103 | 7.959 | 3  |
| 11 | TP53 | ENST00000445888 | p.C141S                | c.422     | Interaction with AXIN1.               | 19.96405103 | 7.959 | 1  |
| 11 | TP53 | ENST00000445888 | p.C141Y                | c.422     | Interaction with AXIN1.               | 19.96405103 | 7.959 | 5  |
| 11 | TP53 | ENST00000445888 | p.C141R                | c.421     | Interaction with AXIN1.               | 19.96405103 | 7.959 | 2  |
| 11 | TP53 | ENST00000445888 | p.K139N                | c.417     | Interaction with AXIN1.               | 9.582713075 | 7.722 | 2  |
| 11 | TP53 | ENST00000445888 | p.A138V                | c.413     | Interaction with AXIN1.               | 12.66526936 | 6.762 | 1  |
| 11 | TP53 | ENST00000445888 | p.A138T                | c.412     | Interaction with AXIN1.               | 12.66526936 | 6.762 | 1  |
| 11 | TP53 | ENST00000445888 | p.L137Q                | c.410     | Interaction with AXIN1.               | 18.33718489 | 6.413 | 1  |
| 11 | TP53 | ENST00000445888 | p.Q136H                | c.408     | Interaction with AXIN1.               | 14.95835856 | 5.373 | 1  |
| 11 | TP53 | ENST00000445888 | p.Q136P                | c.407     | Interaction with AXIN1.               | 14.95835856 | 5.373 | 1  |
| 11 | TP53 | ENST00000445888 | p.Q136E                | c.406     | Interaction with AXIN1.               | 14.95835856 | 5.373 | 3  |
| 11 | TP53 | ENST00000445888 | p.C135W                | c.405     | Interaction with AXIN1.               | 46.52115393 | 2.086 | 2  |
| 11 | TP53 | ENST00000445888 | p.C135F                | c.404     | Interaction with AXIN1.               | 46.52115393 | 2.086 | 2  |
| 11 | TP53 | ENST00000445888 | p.C135S                | c.404     | Interaction with AXIN1.               | 46.52115393 | 2.086 | 1  |
| 11 | TP53 | ENST00000445888 | p.C135Y                | c.404     | Interaction with AXIN1.               | 46.52115393 | 2.086 | 3  |
| 11 | TP53 | ENST00000445888 | p.F134L                | c.400     | Interaction with AXIN1.               | 26.92128345 | 3.171 | 2  |
| 11 | TP53 | ENST00000445888 | p.F134V                | c.400     | Interaction with AXIN1.               | 26.92128345 | 3.171 | 1  |
| 11 | TP53 | ENST00000445888 | p.M133K                | c.398     | Interaction with AXIN1.               | 48.41880559 | 1.841 | 3  |
| 11 | TP53 | ENST00000445888 | p.K132N                | c.396     | Interaction with AXIN1.               | 39.90153437 | 3.369 | 9  |

|    |      |                 |                      |           |                                         |             |       |   |
|----|------|-----------------|----------------------|-----------|-----------------------------------------|-------------|-------|---|
| 11 | TP53 | ENST00000445888 | p.K132M              | c.395     | Interaction with AXIN1.                 | 39.90153437 | 3.369 | 1 |
| 11 | TP53 | ENST00000445888 | p.K132R              | c.395     | Interaction with AXIN1.                 | 39.90153437 | 3.369 | 3 |
| 11 | TP53 | ENST00000445888 | p.K132T              | c.395     | Interaction with AXIN1.                 | 39.90153437 | 3.369 | 2 |
| 11 | TP53 | ENST00000445888 | p.K132E              | c.394     | Interaction with AXIN1.                 | 39.90153437 | 3.369 | 3 |
| 11 | TP53 | ENST00000445888 | p.PAL128in_frame_del | c.390_382 | Interaction with AXIN1.                 | 5.790500811 | 9.226 | 1 |
| 11 | TP53 | ENST00000445888 | p.L130P              | c.389     | Interaction with AXIN1.                 | 11.85161775 | 7.594 | 1 |
| 11 | TP53 | ENST00000445888 | p.L130F              | c.388     | Interaction with AXIN1.                 | 11.85161775 | 7.594 | 4 |
| 11 | TP53 | ENST00000445888 | p.L130V              | c.388     | Interaction with AXIN1.                 | 11.85161775 | 7.594 | 2 |
| 11 | TP53 | ENST00000445888 | p.S127C              | c.380     | Interaction with AXIN1.                 | 19.57954726 | 9.053 | 1 |
| 11 | TP53 | ENST00000445888 | p.S127F              | c.380     | Interaction with AXIN1.                 | 19.57954726 | 9.053 | 4 |
| 11 | TP53 | ENST00000445888 | p.S127Y              | c.380     | Interaction with AXIN1.                 | 19.57954726 | 9.053 | 4 |
| 11 | TP53 | ENST00000445888 | p.S127P              | c.379     | Interaction with AXIN1.                 | 19.57954726 | 9.053 | 2 |
| 11 | TP53 | ENST00000445888 | p.Y126C              | c.377     | Interaction with AXIN1.                 | 13.42486793 | 8.443 | 2 |
| 11 | TP53 | ENST00000445888 | p.Y126S              | c.377     | Interaction with AXIN1.                 | 13.42486793 | 8.443 | 1 |
| 11 | TP53 | ENST00000445888 | p.Y126D              | c.376     | Interaction with AXIN1.                 | 13.42486793 | 8.443 | 1 |
| 11 | TP53 | ENST00000445888 | p.Y126N              | c.376     | Interaction with AXIN1.                 | 13.42486793 | 8.443 | 1 |
| 11 | TP53 | ENST00000445888 | p.T125M              | c.374     | Interaction with AXIN1.                 | 13.98846025 | 6.475 | 2 |
| 11 | TP53 | ENST00000445888 | p.T125P              | c.373     | Interaction with AXIN1.                 | 13.98846025 | 6.475 | 2 |
| 11 | TP53 | ENST00000445888 | p.C124G              | c.370     | Interaction with AXIN1.                 | 3.95442853  | 5.844 | 1 |
| 11 | TP53 | ENST00000445888 | p.K120E              | c.358     | N6-acetyllysine; by KAT6A               | 7.595218439 | 8.898 | 1 |
| 11 | TP53 | ENST00000445888 | p.FLH113in_frame_del | c.344_336 | Required for interaction with FBXO42    | 7.767972993 | 8.585 | 1 |
| 11 | TP53 | ENST00000445888 | p.F113in_frame_del   | c.341_339 | Required for interaction with FBXO42    | 7.767972993 | 8.585 | 1 |
| 11 | TP53 | ENST00000445888 | p.F113L              | c.339     | Required for interaction with FBXO42    | 7.767972993 | 8.585 | 1 |
| 11 | TP53 | ENST00000445888 | p.F113C              | c.338     | Required for interaction with FBXO42    | 7.767972993 | 8.585 | 2 |
| 11 | TP53 | ENST00000445888 | p.F113V              | c.337     | Required for interaction with FBXO42    | 7.767972993 | 8.585 | 1 |
| 11 | TP53 | ENST00000445888 | p.L111P              | c.332     | Required for interaction with ZNF385A   | 7.555025923 | 8.656 | 1 |
| 11 | TP53 | ENST00000445888 | p.L111Q              | c.332     | Required for interaction with ZNF385A   | 7.555025923 | 8.656 | 1 |
| 11 | TP53 | ENST00000445888 | p.L111R              | c.332     | Required for interaction with ZNF385A   | 7.555025923 | 8.656 | 1 |
| 11 | TP53 | ENST00000445888 | p.L111M              | c.331     | Required for interaction with ZNF385A   | 7.555025923 | 8.656 | 1 |
| 11 | TP53 | ENST00000445888 | p.Y107C              | c.320     | Required for interaction with ZNF385A   | 12.60192522 | 8.855 | 1 |
| 11 | TP53 | ENST00000445888 | p.Y107D              | c.319     | Required for interaction with ZNF385A   | 12.60192522 | 8.855 | 2 |
| 11 | TP53 | ENST00000445888 | p.S106R              | c.318     | Required for interaction with ZNF385A   | 13.98003045 | 8.258 | 1 |
| 11 | TP53 | ENST00000445888 | p.G105D              | c.314     | Required for interaction with ZNF385A   | 12.83362803 | 7.757 | 1 |
| 11 | TP53 | ENST00000445888 | p.G105C              | c.313     | Required for interaction with ZNF385A   | 12.83362803 | 7.757 | 2 |
| 11 | TP53 | ENST00000445888 | p.G105R              | c.313     | Required for interaction with ZNF385A   | 12.83362803 | 7.757 | 2 |
| 11 | TP53 | ENST00000445888 | p.G105S              | c.313     | Required for interaction with ZNF385A   | 12.83362803 | 7.757 | 1 |
| 11 | TP53 | ENST00000445888 | p.Q104H              | c.312     | Required for interaction with ZNF385A   | 5.400866919 | 9.939 | 1 |
| 38 | VHL  | ENST00000256474 | p.S65L               | c.194     | NULL                                    | 5.516677126 | 2.215 | 2 |
| 38 | VHL  | ENST00000256474 | p.S65W               | c.194     | NULL                                    | 5.516677126 | 2.215 | 1 |
| 38 | VHL  | ENST00000256474 | p.P86L               | c.257     | NULL                                    | 0.42181287  | 8.59  | 1 |
| 38 | VHL  | ENST00000256474 | p.W88R               | c.262     | NULL                                    | 3.74191187  | 4.943 | 1 |
| 38 | VHL  | ENST00000256474 | p.W88L               | c.263     | NULL                                    | 3.74191187  | 4.943 | 2 |
| 38 | VHL  | ENST00000256474 | p.L89H               | c.266     | NULL                                    | 9.255959724 | 0     | 7 |
| 38 | VHL  | ENST00000256474 | p.L89P               | c.266     | NULL                                    | 9.255959724 | 0     | 2 |
| 38 | VHL  | ENST00000256474 | p.N90I               | c.269     | NULL                                    | 0.748717032 | 5.331 | 1 |
| 38 | VHL  | ENST00000256474 | p.G93V               | c.278     | NULL                                    | 0.163533077 | 7.516 | 1 |
| 38 | VHL  | ENST00000256474 | p.S111N              | c.332     | Involved in binding to CCT complex      | 6.557684786 | 8.4   | 5 |
| 38 | VHL  | ENST00000256474 | p.S111R              | c.333     | Involved in binding to CCT complex      | 6.557684786 | 8.4   | 2 |
| 38 | VHL  | ENST00000256474 | p.Y112D              | c.334     | Involved in binding to CCT complex      | 0.197577875 | 8.885 | 1 |
| 38 | VHL  | ENST00000256474 | p.G114R              | c.340     | Involved in binding to CCT complex      | 3.61363956  | 5.74  | 2 |
| 38 | VHL  | ENST00000256474 | p.G114R              | c.340     | Involved in binding to CCT complex NULL | 3.61363956  | 5.74  | 2 |
| 38 | VHL  | ENST00000256474 | p.H115N              | c.343     | Involved in binding to CCT complex      | 3.260166059 | 5.469 | 2 |
| 38 | VHL  | ENST00000256474 | p.H115Y              | c.343     | Involved in binding to CCT complex      | 3.260166059 | 5.469 | 1 |

|     |      |                 |                           |           |                                                          |             |       |    |
|-----|------|-----------------|---------------------------|-----------|----------------------------------------------------------|-------------|-------|----|
| 38  | VHL  | ENST00000256474 | p.L116in_frame_del        | c.346_348 | Involved in binding to CCT complex                       | 2.302171553 | 2.759 | 1  |
| 38  | VHL  | ENST00000256474 | p.W117C                   | c.351     | Involved in binding to CCT complex                       | 0.968460014 | 4.792 | 1  |
| 38  | VHL  | ENST00000256474 | p.L135F                   | c.405     | Involved in binding to CCT complex NULL                  | 1.641428999 | 4.024 | 2  |
| 38  | VHL  | ENST00000256474 | p.F136V                   | c.406     | Involved in binding to CCT complex NULL                  | 2.017421545 | 8.774 | 1  |
| 38  | VHL  | ENST00000256474 | p.F136Y                   | c.407     | Involved in binding to CCT complex NULL                  | 2.017421545 | 8.774 | 1  |
| 38  | VHL  | ENST00000256474 | p.R205C                   | c.613     | NULL                                                     | 0.096858109 | 8.571 | 1  |
| 117 | PTEN | ENST00000371953 | p.Y46H                    | c.136     | Phosphatase tensin-type                                  | 0.413699317 | 9.951 | 1  |
| 117 | PTEN | ENST00000371953 | p.Y68N                    | c.202     | Phosphatase tensin-type                                  | 2.390297278 | 9.726 | 1  |
| 117 | PTEN | ENST00000371953 | p.Y68C                    | c.203     | Phosphatase tensin-type                                  | 2.390297278 | 9.726 | 1  |
| 117 | PTEN | ENST00000371953 | p.L70H                    | c.209     | Phosphatase tensin-type                                  | 5.927272214 | 3.587 | 1  |
| 117 | PTEN | ENST00000371953 | p.C71Y                    | c.212     | Phosphatase tensin-type                                  | 5.122446591 | 4.072 | 2  |
| 117 | PTEN | ENST00000371953 | p.F90S                    | c.269     | Phosphatase tensin-type                                  | 7.715704853 | 2.989 | 1  |
| 117 | PTEN | ENST00000371953 | p.D92H                    | c.274     | D->A: 700-fold reduction in phosphatas                   | 9.329032304 | 3.545 | 1  |
| 117 | PTEN | ENST00000371953 | p.D92Y                    | c.274     | D->A: 700-fold reduction in phosphatas                   | 9.329032304 | 3.545 | 1  |
| 117 | PTEN | ENST00000371953 | p.D92G                    | c.275     | D->A: 700-fold reduction in phosphatas                   | 9.329032304 | 3.545 | 1  |
| 117 | PTEN | ENST00000371953 | p.D92E                    | c.276     | D->A: 700-fold reduction in phosphatas                   | 9.329032304 | 3.545 | 2  |
| 117 | PTEN | ENST00000371953 | p.H93L                    | c.278     | H->A: 75% reduction in phosphatas                        | 5.005043401 | 4.466 | 1  |
| 117 | PTEN | ENST00000371953 | p.H93R                    | c.278     | H->A: 75% reduction in phosphatas                        | 5.005043401 | 4.466 | 2  |
| 117 | PTEN | ENST00000371953 | p.P95L                    | c.284     | Phosphatase tensin-type                                  | 0.867925039 | 8.029 | 1  |
| 117 | PTEN | ENST00000371953 | p.P96A                    | c.286     | Phosphatase tensin-type                                  | 1.336632939 | 9.847 | 1  |
| 117 | PTEN | ENST00000371953 | p.P96T                    | c.286     | Phosphatase tensin-type                                  | 1.336632939 | 9.847 | 1  |
| 117 | PTEN | ENST00000371953 | p.H123D                   | c.367     | Phosphatase tensin-type                                  | 5.644376973 | 6.646 | 2  |
| 117 | PTEN | ENST00000371953 | p.H123Y                   | c.367     | Phosphatase tensin-type                                  | 5.644376973 | 6.646 | 2  |
| 117 | PTEN | ENST00000371953 | p.H123L                   | c.368     | Phosphatase tensin-type                                  | 5.644376973 | 6.646 | 1  |
| 117 | PTEN | ENST00000371953 | p.C124R                   | c.370     | C->A: Loss of protein phosphatas                         | 0.947272395 | 7.251 | 1  |
| 117 | PTEN | ENST00000371953 | p.KAGKGRGV125in_frame_del | c.373_399 | K->M: Reduced phosphatase activit                        | 2.784531773 | 6.595 | 1  |
| 117 | PTEN | ENST00000371953 | p.K125N                   | c.375     | K->M: Reduced phosphatase activit                        | 2.784531773 | 6.595 | 1  |
| 117 | PTEN | ENST00000371953 | p.G127R                   | c.379     | Phosphatase tensin-type                                  | 3.87047826  | 9.287 | 3  |
| 117 | PTEN | ENST00000371953 | p.G127V                   | c.380     | Phosphatase tensin-type                                  | 3.87047826  | 9.287 | 1  |
| 117 | PTEN | ENST00000371953 | p.K128Q                   | c.382     | K->R: Does not reduce phosphatas                         | 3.399057354 | 8.882 | 2  |
| 117 | PTEN | ENST00000371953 | p.K128N                   | c.384     | K->R: Does not reduce phosphatas                         | 3.399057354 | 8.882 | 1  |
| 117 | PTEN | ENST00000371953 | p.G129E                   | c.386     | Phosphatase tensin-type                                  | 3.864313046 | 7.305 | 2  |
| 117 | PTEN | ENST00000371953 | p.G129V                   | c.386     | Phosphatase tensin-type                                  | 3.864313046 | 7.305 | 2  |
| 117 | PTEN | ENST00000371953 | p.R130G                   | c.388     | R->M: Does not affect the ability t                      | 58.12861928 | 0     | 26 |
| 117 | PTEN | ENST00000371953 | p.R130L                   | c.389     | R->M: Does not affect the ability t                      | 58.12861928 | 0     | 5  |
| 117 | PTEN | ENST00000371953 | p.R130P                   | c.389     | R->M: Does not affect the ability t                      | 58.12861928 | 0     | 4  |
| 117 | PTEN | ENST00000371953 | p.R130Q                   | c.389     | R->M: Does not affect the ability t                      | 58.12861928 | 0     | 23 |
| 117 | PTEN | ENST00000371953 | p.T131A                   | c.391     | Phosphatase tensin-type                                  | 0.906423223 | 7.144 | 1  |
| 117 | PTEN | ENST00000371953 | p.G132D                   | c.395     | Phosphatase tensin-type                                  | 1.411028517 | 9.291 | 2  |
| 117 | PTEN | ENST00000371953 | p.M134in_frame_del        | c.400_402 | Phosphatase tensin-type                                  | 2.154802888 | 6.843 | 1  |
| 117 | PTEN | ENST00000371953 | p.M134I                   | c.402     | Phosphatase tensin-type                                  | 2.154802888 | 6.843 | 1  |
| 117 | PTEN | ENST00000371953 | p.Y155C                   | c.464     | Phosphatase tensin-type                                  | 2.376271263 | 5.997 | 1  |
| 117 | PTEN | ENST00000371953 | p.Q171K                   | c.511     | Q->A,E: 75% reduction in phosphatas                      | 4.784147755 | 3.96  | 1  |
| 117 | PTEN | ENST00000371953 | p.H272P                   | c.815     | C2 tensin-type.                                          | 1.550471222 | 9.723 | 1  |
| 117 | PTEN | ENST00000371953 | p.H272R                   | c.815     | C2 tensin-type.                                          | 1.550471222 | 9.723 | 1  |
| 117 | PTEN | ENST00000371953 | p.D326G                   | c.977     | C2 tensin-type.                                          | 1.394102772 | 9.083 | 1  |
| 133 | B2M  | ENST00000544417 | p.R3C                     | c.7       | NULL                                                     | 0.142273416 | 6.198 | 1  |
| 133 | B2M  | ENST00000544417 | p.A6V                     | c.17      | NULL                                                     | 0.030855348 | 8.422 | 1  |
| 133 | B2M  | ENST00000544417 | p.Y30H                    | c.88      | Albumin 1.  Alpha-1  Extracellular.  Ig-like C1-type     | 0.340111208 | 3.101 | 1  |
| 133 | B2M  | ENST00000544417 | p.V47M                    | c.139     | Alpha-1  Extracellular.  Ig-like C1-type  Ig-like V-type | 0.546908006 | 2.41  | 1  |
| 133 | B2M  | ENST00000544417 | p.H51P                    | c.152     | Alpha-1  Extracellular.  Ig-like C1-type                 | 0.291694227 | 2.866 | 1  |
| 133 | B2M  | ENST00000544417 | p.D54N                    | c.160     | Alpha-1  Extracellular.  Ig-like C1-type                 | 0.219666436 | 3.632 | 1  |
| 133 | B2M  | ENST00000544417 | p.SKDWFSFY7in_frame_delN  | c.230_247 | Alpha-1  Extracellular.  Ig-like C1-type  Ig-like V-type | 0.071750346 | 7.762 | 1  |

|     |        |                 |                             |             |                                                                     |             |       |   |
|-----|--------|-----------------|-----------------------------|-------------|---------------------------------------------------------------------|-------------|-------|---|
| 133 | B2M    | ENST00000544417 | p.Y83F                      | c.248       | Alpha-1 Extracellular. Ig-like C1-type Ig-like V-type               | 0.594248946 | 0     | 1 |
| 133 | B2M    | ENST00000544417 | p.P92A                      | c.274       | Albumin 1. Ig-like C1-type                                          | 0.267574809 | 5.577 | 1 |
| 133 | B2M    | ENST00000544417 | p.E94K                      | c.280       | Albumin 1. Alpha-1 Extracellular. Ig-like C1-type Ig-like C2-type 1 | 0.233524137 | 5.077 | 1 |
| 142 | PIK3R1 | ENST00000396611 | p.L466in_frame_del          | c.1395_1397 | C2 PI3K-type. NULL                                                  | 1.607042583 | 5.78  | 1 |
| 142 | PIK3R1 | ENST00000396611 | p.LYEEY466in_frame_delf     | c.1398_1409 | C2 PI3K-type. NULL                                                  | 1.607042583 | 5.78  | 1 |
| 142 | PIK3R1 | ENST00000396611 | p.I559V                     | c.1675      | NULL PIK helical.                                                   | 1.283062508 | 9.027 | 1 |
| 142 | PIK3R1 | ENST00000396611 | p.I559T                     | c.1676      | NULL PIK helical.                                                   | 1.283062508 | 9.027 | 1 |
| 142 | PIK3R1 | ENST00000396611 | p.MNSIKPDL563in_frame_dell  | c.1688_1708 | NULL PIK helical.                                                   | 1.274656779 | 9.236 | 1 |
| 142 | PIK3R1 | ENST00000396611 | p.NSIKPDLIQL564in_frame_del | c.1688_1717 | NULL PIK helical.                                                   | 6.043548531 | 0     | 1 |
| 142 | PIK3R1 | ENST00000396611 | p.MN563in_frame_dell        | c.1689_1691 | NULL PIK helical.                                                   | 1.274656779 | 9.236 | 1 |
| 142 | PIK3R1 | ENST00000396611 | p.N564D                     | c.1690      | NULL PIK helical.                                                   | 6.043548531 | 0     | 5 |
| 142 | PIK3R1 | ENST00000396611 | p.NSIKP564in_frame_dellT    | c.1691_1702 | NULL PIK helical.                                                   | 6.043548531 | 0     | 1 |
| 149 | EP300  | ENST00000263253 | p.H1377R                    | c.4130      | CBP/p300-type HAT.                                                  | 0.260094495 | 6.623 | 1 |
| 149 | EP300  | ENST00000263253 | p.Y1397D                    | c.4189      | Y->W: Loss of activity; when associate                              | 0.368315975 | 7.472 | 1 |
| 149 | EP300  | ENST00000263253 | p.L1398P                    | c.4193      | Acetyl-CoA binding                                                  | 0.263345414 | 7.076 | 1 |
| 149 | EP300  | ENST00000263253 | p.D1399N                    | c.4195      | D->Y: Abolishes autoacetylation. Does no                            | 6.468423377 | 0     | 6 |
| 149 | EP300  | ENST00000263253 | p.D1399Y                    | c.4195      | D->Y: Abolishes autoacetylation. Does no                            | 6.468423377 | 0     | 1 |
| 149 | EP300  | ENST00000263253 | p.Y1446C                    | c.4337      | CBP/p300-type HAT.                                                  | 1.120758139 | 3.654 | 1 |
| 149 | EP300  | ENST00000263253 | p.H1451P                    | c.4352      | CBP/p300-type HAT.                                                  | 2.114327543 | 2.682 | 1 |
| 149 | EP300  | ENST00000263253 | p.H1451R                    | c.4352      | CBP/p300-type HAT.                                                  | 2.114327543 | 2.682 | 1 |
| 149 | EP300  | ENST00000263253 | p.Q1455H                    | c.4365      | CBP/p300-type HAT.                                                  | 0.209536346 | 5.273 | 1 |
| 149 | EP300  | ENST00000263253 | p.R1627W                    | c.4879      | Binding region for E1A adenovirus                                   | 1.481693349 | 6.144 | 2 |
| 239 | PBRM1  | ENST00000296302 | p.G626V                     | c.1877      | NULL                                                                | 0.181783125 | 7.784 | 1 |
| 239 | PBRM1  | ENST00000296302 | p.L618H                     | c.1853      | NULL                                                                | 0.102014558 | 5.015 | 1 |
| 239 | PBRM1  | ENST00000296302 | p.M586I                     | c.1758      | Bromo 4.                                                            | 2.191147673 | 0     | 1 |
| 239 | PBRM1  | ENST00000296302 | p.M586K                     | c.1757      | Bromo 4.                                                            | 2.191147673 | 0     | 1 |
| 239 | PBRM1  | ENST00000296302 | p.M586T                     | c.1757      | Bromo 4.                                                            | 2.191147673 | 0     | 1 |
| 239 | PBRM1  | ENST00000296302 | p.E583K                     | c.1747      | Bromo 4.                                                            | 0.278465337 | 7.029 | 1 |
| 239 | PBRM1  | ENST00000296302 | p.Y580C                     | c.1739      | Bromo 4.                                                            | 0.089261614 | 7.281 | 1 |
| 239 | PBRM1  | ENST00000296302 | p.I575N                     | c.1724      | Bromo 4.                                                            | 0.078506101 | 7.474 | 1 |
| 239 | PBRM1  | ENST00000296302 | p.M523R                     | c.1568      | NULL                                                                | 0.522158612 | 3.27  | 1 |
| 239 | PBRM1  | ENST00000296302 | p.R522L                     | c.1565      | NULL                                                                | 0.396447426 | 4.952 | 1 |
| 251 | CDKN2C | ENST00000371761 | p.R39T                      | c.116       | ANK 2 Protein kinase.                                               | 0.244876218 | 4.165 | 1 |
| 251 | CDKN2C | ENST00000371761 | p.D64N                      | c.190       | ANK 2                                                               | 0.050994492 | 6.922 | 1 |
| 251 | CDKN2C | ENST00000371761 | p.K66E                      | c.196       | NULL                                                                | 0.266845778 | 0     | 1 |
| 251 | CDKN2C | ENST00000371761 | p.D67N                      | c.199       | NULL                                                                | 0.20189462  | 6.652 | 1 |
| 251 | CDKN2C | ENST00000371761 | p.E99K                      | c.295       | NULL                                                                | 0.259985969 | 2.374 | 1 |
| 260 | MSH6   | ENST00000234420 | p.A1206E                    | c.3617      | NULL                                                                | 0.011351289 | 6.461 | 1 |
| 260 | MSH6   | ENST00000234420 | p.T1238A                    | c.3712      | NULL                                                                | 0.011351289 | 0     | 1 |
| 298 | CDKN2A | ENST00000361570 | p.G173A                     | c.518       | ANK 4                                                               | 0.132377231 | 9.933 | 1 |
| 298 | CDKN2A | ENST00000579122 | p.P114H                     | c.341       | ANK 4                                                               | 6.901241762 | 2.315 | 1 |
| 298 | CDKN2A | ENST00000579122 | p.P114L                     | c.341       | ANK 4                                                               | 6.901241762 | 2.315 | 5 |
| 298 | CDKN2A | ENST00000579122 | p.D108G                     | c.323       | NULL                                                                | 8.29796535  | 2.061 | 1 |
| 298 | CDKN2A | ENST00000579122 | p.D108V                     | c.323       | NULL                                                                | 8.29796535  | 2.061 | 1 |
| 298 | CDKN2A | ENST00000361570 | p.R163L                     | c.488       | NULL                                                                | 8.29796535  | 2.061 | 3 |
| 298 | CDKN2A | ENST00000361570 | p.R163Q                     | c.488       | NULL                                                                | 8.29796535  | 2.061 | 2 |
| 298 | CDKN2A | ENST00000579122 | p.R107H                     | c.320       | NULL                                                                | 1.103300705 | 3.285 | 1 |
| 298 | CDKN2A | ENST00000579122 | p.L104Q                     | c.311       | ANK 3                                                               | 0.219254757 | 8.747 | 1 |
| 298 | CDKN2A | ENST00000361570 | p.G143K                     | c.428_427   | ANK 3 Protein kinase.                                               | 1.874759582 | 6.756 | 2 |
| 298 | CDKN2A | ENST00000579122 | p.R87P                      | c.260       | ANK 3 Protein kinase.                                               | 0.760888456 | 6.314 | 1 |
| 298 | CDKN2A | ENST00000579122 | p.D84V                      | c.251       | ANK 3                                                               | 3.524810784 | 6.472 | 1 |
| 298 | CDKN2A | ENST00000361570 | p.R139Q                     | c.416       | ANK 3                                                               | 3.524810784 | 6.472 | 2 |
| 298 | CDKN2A | ENST00000361570 | p.R139G                     | c.415       | ANK 3                                                               | 9.313584339 | 0     | 1 |

|     |        |                 |                    |           |                                         |             |       |    |
|-----|--------|-----------------|--------------------|-----------|-----------------------------------------|-------------|-------|----|
| 298 | CDKN2A | ENST00000579122 | p.H83R             | c.248     | ANK 3                                   | 9.313584339 | 0     | 2  |
| 298 | CDKN2A | ENST00000361570 | p.A138V            | c.413     | ANK 3                                   | 9.313584339 | 0     | 4  |
| 298 | CDKN2A | ENST00000579122 | p.P81L             | c.242     | ANK 3                                   | 2.508113185 | 6.111 | 2  |
| 298 | CDKN2A | ENST00000579122 | p.R80Q             | c.239     | ANK 3                                   | 2.414195239 | 4.828 | 1  |
| 298 | CDKN2A | ENST00000579122 | p.D74V             | c.221     | NULL                                    | 0.514892296 | 7.796 | 1  |
| 298 | CDKN2A | ENST00000579122 | p.A73D             | c.218     | NULL                                    | 0.625702342 | 7.385 | 1  |
| 298 | CDKN2A | ENST00000361570 | p.D109in_frame_del | c.328_326 | ANK 2 Protein kinase.                   | 2.182287415 | 4.832 | 1  |
| 298 | CDKN2A | ENST00000361570 | p.D109H            | c.325     | ANK 2 Protein kinase.                   | 0.843299045 | 9.633 | 1  |
| 298 | CDKN2A | ENST00000579122 | p.Q50H             | c.150     | ANK 2                                   | 4.274534366 | 4.349 | 2  |
| 298 | CDKN2A | ENST00000579122 | p.Q50R             | c.149     | ANK 2                                   | 4.274534366 | 4.349 | 1  |
| 298 | CDKN2A | ENST00000579122 | p.A20E             | c.59      | ANK 1 ATP.                              | 1.137698738 | 9.653 | 1  |
| 299 | RUNX1  | ENST00000300305 | p.R162S            | c.486     | NULL R->A: Strongly reduces DNA-binding | 3.425639453 | 0     | 1  |
| 299 | RUNX1  | ENST00000300305 | p.R162K            | c.485     | NULL R->A: Strongly reduces DNA-binding | 3.425639453 | 0     | 1  |
| 299 | RUNX1  | ENST00000300305 | p.R162G            | c.484     | NULL R->A: Strongly reduces DNA-binding | 3.425639453 | 0     | 2  |
| 299 | RUNX1  | ENST00000300305 | p.L161P            | c.482     | NULL Runt.                              | 0.607115261 | 4.747 | 1  |
| 299 | RUNX1  | ENST00000300305 | p.D160G            | c.479     | Runt.                                   | 0.109494128 | 7.171 | 1  |
| 299 | RUNX1  | ENST00000300305 | p.A134P            | c.400     | A->T: Loss of heterodimerization NULL   | 0.095722634 | 7.278 | 1  |
| 299 | RUNX1  | ENST00000300305 | p.V118A            | c.353     | NULL Runt.                              | 0.10171235  | 9.321 | 1  |
| 299 | RUNX1  | ENST00000300305 | p.P113L            | c.338     | NULL Runt.                              | 1.99354314  | 2.421 | 1  |
| 299 | RUNX1  | ENST00000300305 | p.P113S            | c.337     | NULL Runt.                              | 1.99354314  | 2.421 | 1  |
| 424 | STK11  | ENST00000326873 | p.D176A            | c.527     | Proton acceptor                         | 0.175757649 | 7.848 | 1  |
| 424 | STK11  | ENST00000326873 | p.N181Y            | c.541     | Protein kinase.                         | 1.032504345 | 0     | 1  |
| 424 | STK11  | ENST00000326873 | p.N181I            | c.542     | Protein kinase.                         | 1.032504345 | 0     | 1  |
| 424 | STK11  | ENST00000326873 | p.S216F            | c.647     | Protein kinase.                         | 0.223851136 | 5.15  | 1  |
| 429 | FBXW7  | ENST00000603548 | p.S585T            | c.1754    | WD 6                                    | 0.635102071 | 8.673 | 1  |
| 429 | FBXW7  | ENST00000603548 | p.S546L            | c.1637    | WD 5                                    | 0.840210304 | 7.971 | 1  |
| 429 | FBXW7  | ENST00000603548 | p.Y545C            | c.1634    | WD 5                                    | 3.965100103 | 5.313 | 2  |
| 429 | FBXW7  | ENST00000603548 | p.R543G            | c.1627    | WD 5                                    | 0.456319897 | 9.332 | 1  |
| 429 | FBXW7  | ENST00000603548 | p.R505H            | c.1514    | WD 4                                    | 24.91148582 | 2.758 | 1  |
| 429 | FBXW7  | ENST00000603548 | p.R505L            | c.1514    | WD 4                                    | 24.91148582 | 2.758 | 1  |
| 429 | FBXW7  | ENST00000603548 | p.R505C            | c.1513    | WD 4                                    | 24.91148582 | 2.758 | 9  |
| 429 | FBXW7  | ENST00000603548 | p.R505G            | c.1513    | WD 4                                    | 24.91148582 | 2.758 | 10 |
| 429 | FBXW7  | ENST00000603548 | p.R505S            | c.1513    | WD 4                                    | 24.91148582 | 2.758 | 1  |
| 429 | FBXW7  | ENST00000603548 | p.R479P            | c.1436    | WD 3                                    | 5.329626149 | 9.279 | 1  |
| 429 | FBXW7  | ENST00000603548 | p.R479Q            | c.1436    | WD 3                                    | 5.329626149 | 9.279 | 5  |
| 429 | FBXW7  | ENST00000603548 | p.S476R            | c.1428    | WD 3                                    | 1.073963668 | 8.976 | 1  |
| 429 | FBXW7  | ENST00000603548 | p.S476I            | c.1427    | WD 3                                    | 1.073963668 | 8.976 | 1  |
| 429 | FBXW7  | ENST00000603548 | p.R465H            | c.1394    | WD 3                                    | 26.49928975 | 0     | 14 |
| 429 | FBXW7  | ENST00000603548 | p.R465C            | c.1393    | WD 3                                    | 26.49928975 | 0     | 10 |
| 429 | FBXW7  | ENST00000603548 | p.G437R            | c.1309    | WD 2                                    | 0.633099627 | 5.524 | 1  |
| 429 | FBXW7  | ENST00000603548 | p.S426L            | c.1277    | WD 2                                    | 3.807783423 | 2.87  | 1  |
| 429 | FBXW7  | ENST00000603548 | p.T385K            | c.1154    | WD 1                                    | 0.754925512 | 5.912 | 1  |
| 458 | RNF43  | ENST00000584437 | p.M173T            | c.518     | Extracellular. TSP type-1.              | 0.011748081 | 0     | 1  |
| 458 | RNF43  | ENST00000584437 | p.H86R             | c.257     | Extracellular. NULL                     | 0.001051016 | 9.894 | 1  |
| 458 | RNF43  | ENST00000584437 | p.S85F             | c.254     | Extracellular. FU 1                     | 0.00323056  | 8.274 | 1  |
| 458 | RNF43  | ENST00000584437 | p.M83T             | c.248     | Extracellular. FU 1                     | 0.002470468 | 8.661 | 1  |
| 458 | RNF43  | ENST00000584437 | p.L82S             | c.245     | Extracellular. FU 1                     | 0.010339535 | 7.645 | 1  |
| 500 | CASP8  | ENST00000358485 | p.R307W            | c.919     | NULL                                    | 0.066707834 | 0     | 1  |
| 500 | CASP8  | ENST00000358485 | p.G387R            | c.1159    | NULL                                    | 0.066707834 | 3.906 | 1  |
| 516 | CASP8  | ENST00000358485 | p.Y285F            | c.854     | NULL                                    | 0.180215199 | 6.106 | 1  |
| 516 | CASP8  | ENST00000358485 | p.M287T            | c.860     | NULL                                    | 0.390902667 | 6.25  | 1  |
| 516 | CASP8  | ENST00000358485 | p.R292W            | c.874     | NULL                                    | 1.374498952 | 8.013 | 1  |
| 516 | CASP8  | ENST00000358485 | p.R292Q            | c.875     | NULL                                    | 1.374498952 | 8.013 | 1  |

|      |        |                 |                         |             |                         |             |       |    |
|------|--------|-----------------|-------------------------|-------------|-------------------------|-------------|-------|----|
| 516  | CASP8  | ENST00000358485 | p.C295Y                 | c.884       | NULL                    | 0.20215798  | 5.167 | 1  |
| 516  | CASP8  | ENST00000358485 | p.TT331in_frame_del     | c.987_992   | NULL                    | 0.145910601 | 8.022 | 1  |
| 516  | CASP8  | ENST00000358485 | p.D362G                 | c.1085      | NULL                    | 1.395897091 | 0     | 1  |
| 516  | CASP8  | ENST00000358485 | p.D362V                 | c.1085      | NULL                    | 1.395897091 | 0     | 1  |
| 516  | CASP8  | ENST00000358485 | p.D367G                 | c.1100      | NULL                    | 0.809996105 | 5.429 | 1  |
| 516  | CASP8  | ENST00000358485 | p.S397C                 | c.1190      | NULL                    | 0.324589755 | 3.191 | 1  |
| 516  | CASP8  | ENST00000358485 | p.P411H                 | c.1232      | NULL                    | 0.725860955 | 2.749 | 1  |
| 516  | CASP8  | ENST00000358485 | p.K412T                 | c.1235      | NULL                    | 0.144797607 | 4.681 | 1  |
| 516  | CASP8  | ENST00000358485 | p.P453L                 | c.1358      | NULL                    | 0.111991267 | 6.901 | 1  |
| 566  | GATA3  | ENST00000379328 | p.G279S                 | c.835       | GATA-type 1.            | 0.072080427 | 0     | 1  |
| 566  | GATA3  | ENST00000379328 | p.R313K                 | c.938       | Flexible linker         | 0.030042171 | 5.118 | 1  |
| 566  | GATA3  | ENST00000379328 | p.M369I                 | c.1107      | NULL                    | 0.044531086 | 4.53  | 1  |
| 585  | MAP2K4 | ENST00000415385 | p.R145W                 | c.433       | Protein kinase.         | 1.04254823  | 6.634 | 2  |
| 585  | MAP2K4 | ENST00000415385 | p.V148M                 | c.442       | Protein kinase.         | 0.246758315 | 3.142 | 1  |
| 585  | MAP2K4 | ENST00000415385 | p.E152K                 | c.454       | Protein kinase.         | 0.138742895 | 3.929 | 1  |
| 585  | MAP2K4 | ENST00000415385 | p.G263R                 | c.787       | Protein kinase.         | 0.055388502 | 9.719 | 1  |
| 585  | MAP2K4 | ENST00000415385 | p.S268F                 | c.803       | Phosphoserine; by MAP3K | 1.200259189 | 0     | 2  |
| 621  | SMAD4  | ENST00000342988 | p.D355G                 | c.1064      | MH2.                    | 0.695975198 | 6.069 | 1  |
| 621  | SMAD4  | ENST00000342988 | p.P356L                 | c.1067      | MH2.                    | 0.24808786  | 8.724 | 1  |
| 621  | SMAD4  | ENST00000342988 | p.RFCLG361in_frame_del  | c.1080_1094 | MH2.                    | 17.70598522 | 0     | 1  |
| 621  | SMAD4  | ENST00000342988 | p.R361C                 | c.1081      | MH2.                    | 17.70598522 | 0     | 5  |
| 621  | SMAD4  | ENST00000342988 | p.R361S                 | c.1081      | MH2.                    | 17.70598522 | 0     | 1  |
| 621  | SMAD4  | ENST00000342988 | p.R361H                 | c.1082      | MH2.                    | 17.70598522 | 0     | 10 |
| 621  | SMAD4  | ENST00000342988 | p.R361P                 | c.1082      | MH2.                    | 17.70598522 | 0     | 1  |
| 621  | SMAD4  | ENST00000342988 | p.D537Y                 | c.1609      | MH2.                    | 6.20480619  | 2.538 | 1  |
| 621  | SMAD4  | ENST00000342988 | p.D537G                 | c.1610      | MH2.                    | 6.20480619  | 2.538 | 1  |
| 621  | SMAD4  | ENST00000342988 | p.D537V                 | c.1610      | MH2.                    | 6.20480619  | 2.538 | 1  |
| 621  | SMAD4  | ENST00000342988 | p.D537E                 | c.1611      | MH2.                    | 6.20480619  | 2.538 | 1  |
| 685  | HNF1A  | ENST00000541395 | p.M154T                 | c.461       | NULL                    | 0.017938165 | 5.974 | 1  |
| 685  | HNF1A  | ENST00000541395 | p.R159L                 | c.476       | NULL                    | 0.129567104 | 2.971 | 1  |
| 685  | HNF1A  | ENST00000540108 | p.P112S                 | c.334       | NULL                    | 0.143447226 | 0     | 1  |
| 777  | MLH1   | ENST00000231790 | p.L588R                 | c.1763      | Interaction with EXO1   | 0.008906041 | 6.811 | 1  |
| 777  | MLH1   | ENST00000231790 | p.L590I                 | c.1768      | Interaction with EXO1   | 0.078237279 | 3.676 | 1  |
| 777  | MLH1   | ENST00000231790 | p.L658I                 | c.1972      | NULL                    | 0.08714332  | 0     | 1  |
| 814  | SMAD2  | ENST00000402690 | p.G421W                 | c.1261      | MH2.                    | 0.104206094 | 3.375 | 1  |
| 814  | SMAD2  | ENST00000402690 | p.R415I                 | c.1244      | MH2.                    | 0.08892659  | 3.624 | 1  |
| 814  | SMAD2  | ENST00000402690 | p.F356C                 | c.1067      | MH2.                    | 0.17749685  | 0     | 1  |
| 926  | CDH1   | ENST00000261769 | p.ENEKGP165in_frame_del | c.488_505   | Cadherin 1.             | 0.324553195 | 3.01  | 1  |
| 926  | CDH1   | ENST00000261769 | p.R222G                 | c.664       | Cadherin 1. NULL        | 0.518085003 | 2.485 | 1  |
| 926  | CDH1   | ENST00000261769 | p.D254Y                 | c.760       | Cadherin 1.             | 0.519039217 | 0     | 1  |
| 926  | CDH1   | ENST00000261769 | p.D290G                 | c.869       | Cadherin 2.             | 0.237021993 | 3.44  | 1  |
| 926  | CDH1   | ENST00000261769 | p.D291N                 | c.871       | Cadherin 2.             | 0.244089459 | 3.01  | 1  |
| 1070 | MSH6   | ENST00000234420 | p.D422G                 | c.1265      | NULL                    | 0.017349044 | 5.849 | 1  |
| 1070 | MSH6   | ENST00000234420 | p.L423I                 | c.1267      | NULL                    | 0.04993988  | 4.658 | 1  |
| 1070 | MSH6   | ENST00000234420 | p.V480L                 | c.1438      | NULL                    | 0.064283585 | 0     | 1  |
| 1070 | MSH6   | ENST00000234420 | p.K519N                 | c.1557      | NULL                    | 0.007324774 | 7.093 | 1  |
| 1111 | MEN1   | ENST00000443283 | p.G424D                 | c.1271      | NULL                    | 0.013267129 | 6.236 | 1  |
| 1111 | MEN1   | ENST00000443283 | p.D348N                 | c.1042_1041 | Interaction with FANCD2 | 0.013267129 | 0     | 1  |
| 1169 | MEN1   | ENST00000443283 | p.E363G                 | c.1088      | Interaction with FANCD2 | 1.010033717 | 0     | 1  |
| 1169 | MEN1   | ENST00000443283 | p.E363K                 | c.1087      | Interaction with FANCD2 | 1.010033717 | 0     | 1  |
| 1169 | MEN1   | ENST00000443283 | p.H179Y                 | c.535       | NULL                    | 0.020067435 | 6.639 | 1  |
| 1272 | MSH2   | ENST00000233146 | p.R383L                 | c.1148      | NULL                    | 0.097253817 | 9.505 | 1  |
| 1272 | MSH2   | ENST00000233146 | p.R406Q                 | c.1217      | NULL                    | 0.028459599 | 7.239 | 1  |

|      |         |                 |          |        |                                        |             |       |   |
|------|---------|-----------------|----------|--------|----------------------------------------|-------------|-------|---|
| 1272 | MSH2    | ENST00000233146 | p.G410S  | c.1228 | NULL                                   | 0.097407287 | 5.779 | 1 |
| 1272 | MSH2    | ENST00000233146 | p.N412H  | c.1234 | NULL                                   | 0.116793944 | 3.124 | 1 |
| 1272 | MSH2    | ENST00000233146 | p.Q451E  | c.1351 | NULL                                   | 0.140912641 | 0     | 1 |
| 1336 | SETD2   | ENST00000409792 | p.W1640C | c.4920 | SET.                                   | 1.425932463 | 0     | 1 |
| 1336 | SETD2   | ENST00000409792 | p.W1640R | c.4918 | SET.                                   | 1.425932463 | 0     | 1 |
| 1336 | SETD2   | ENST00000409792 | p.N1541S | c.4622 | AWS.                                   | 1.290947196 | 3.341 | 2 |
| 1336 | SETD2   | ENST00000409792 | p.E1528D | c.4584 | AWS.                                   | 0.176901906 | 3.728 | 1 |
| 1336 | SETD2   | ENST00000409792 | p.R1523H | c.4568 | AWS.                                   | 1.166719732 | 3.769 | 1 |
| 1336 | SETD2   | ENST00000409792 | p.R1523C | c.4567 | AWS.                                   | 1.166719732 | 3.769 | 1 |
| 1336 | SETD2   | ENST00000409792 | p.C1516F | c.4547 | AWS.                                   | 0.254478412 | 7.291 | 1 |
| 1351 | SMAD4   | ENST00000342988 | p.A406T  | c.1216 | MH2.                                   | 0.129772903 | 0     | 1 |
| 1351 | SMAD4   | ENST00000342988 | p.K428T  | c.1283 | N6-acetylysine NULL                    | 0.092514407 | 3.492 | 1 |
| 1351 | SMAD4   | ENST00000342988 | p.S504R  | c.1512 | MH2.                                   | 0.044527634 | 4.612 | 1 |
| 1467 | RB1     | ENST00000267163 | p.K94N   | c.282  | NULL                                   | 0.015061403 | 6.053 | 1 |
| 1467 | RB1     | ENST00000267163 | p.L134V  | c.400  | NULL                                   | 0.015061403 | 0     | 1 |
| 1522 | SMAD2   | ENST00000402690 | p.D450N  | c.1348 | MH2.                                   | 0.196389294 | 5.785 | 1 |
| 1522 | SMAD2   | ENST00000402690 | p.L446V  | c.1336 | MH2.                                   | 0.188058299 | 4.107 | 1 |
| 1522 | SMAD2   | ENST00000402690 | p.L442V  | c.1324 | MH2.                                   | 0.083316781 | 5.906 | 1 |
| 1522 | SMAD2   | ENST00000402690 | p.P305L  | c.914  | MH2. SAD                               | 1.095334637 | 0     | 1 |
| 1522 | SMAD2   | ENST00000402690 | p.P305Q  | c.914  | MH2. SAD                               | 1.095334637 | 0     | 1 |
| 1522 | SMAD2   | ENST00000402690 | p.D304G  | c.911  | MH2. SAD                               | 0.166215063 | 8.65  | 1 |
| 1596 | EP300   | ENST00000263253 | p.R1737C | c.5209 | Binding region for E1A adenovirus      | 0.016827912 | 0     | 1 |
| 1596 | EP300   | ENST00000263253 | p.K1760R | c.5279 | Binding region for E1A adenovirus NULL | 0.016827912 | 5.893 | 1 |
| 1599 | RB1     | ENST00000267163 | p.V654L  | c.1960 | Domain B                               | 1.013926726 | 0     | 1 |
| 1599 | RB1     | ENST00000267163 | p.V654M  | c.1960 | Domain B                               | 1.013926726 | 0     | 1 |
| 1599 | RB1     | ENST00000267163 | p.M695V  | c.2083 | Domain B                               | 0.0388409   | 6.166 | 1 |
| 1607 | PIK3R1  | ENST00000396611 | p.P625R  | c.1874 | NULL                                   | 0.015282393 | 8.521 | 1 |
| 1607 | PIK3R1  | ENST00000396611 | p.G635A  | c.1904 | SH2 2.                                 | 0.210055176 | 9.186 | 1 |
| 1607 | PIK3R1  | ENST00000396611 | p.E643K  | c.1927 | SH2 2.                                 | 0.012508168 | 6.604 | 1 |
| 1607 | PIK3R1  | ENST00000396611 | p.R650P  | c.1949 | SH2 2.                                 | 0.012284767 | 6.63  | 1 |
| 1607 | PIK3R1  | ENST00000396611 | p.F654S  | c.1961 | SH2 2.                                 | 0.235496942 | 2.206 | 1 |
| 1607 | PIK3R1  | ENST00000396611 | p.R657W  | c.1969 | SH2 2.                                 | 0.218365166 | 6.923 | 1 |
| 1607 | PIK3R1  | ENST00000396611 | p.V726A  | c.2177 | SH2 2.                                 | 0.249790906 | 0     | 1 |
| 1698 | PAX5    | ENST00000358127 | p.H62Q   | c.186  | Paired.                                | 1.029708097 | 0     | 1 |
| 1698 | PAX5    | ENST00000358127 | p.H62N   | c.184  | Paired.                                | 1.029708097 | 0     | 1 |
| 1698 | PAX5    | ENST00000358127 | p.L23P   | c.68   | Paired.                                | 0.059416194 | 5.073 | 1 |
| 1707 | MSH6    | ENST00000234420 | p.M868T  | c.2603 | NULL                                   | 1.008875229 | 0     | 1 |
| 1707 | MSH6    | ENST00000234420 | p.M868I  | c.2604 | NULL                                   | 1.008875229 | 0     | 1 |
| 1707 | MSH6    | ENST00000234420 | p.S1049F | c.3146 | NULL                                   | 0.017750457 | 6.816 | 1 |
| 1773 | CDKN2A  | ENST00000498124 | p.G150S  | c.448  | NULL                                   | 0.112111102 | 0     | 1 |
| 1773 | CDKN2A  | ENST00000361570 | p.G166R  | c.496  | ANK 4                                  | 0.112111102 | 3.157 | 1 |
| 1818 | CDH1    | ENST00000261769 | p.P260H  | c.779  | Cadherin 1.                            | 0.053144827 | 4.381 | 1 |
| 1818 | CDH1    | ENST00000261769 | p.E261K  | c.781  | Cadherin 1.                            | 0.112471436 | 3.22  | 1 |
| 1818 | CDH1    | ENST00000261769 | p.A286V  | c.857  | Cadherin 2.                            | 0.15531475  | 0     | 1 |
| 2050 | SMARCA4 | ENST00000358026 | p.K1493N | c.4479 | NULL                                   | 0.260100157 | 0     | 1 |
| 2050 | SMARCA4 | ENST00000358026 | p.R1552H | c.4655 | Bromo.                                 | 0.168820083 | 2.714 | 1 |
| 2050 | SMARCA4 | ENST00000358026 | p.D1600N | c.4798 | NULL                                   | 0.124106466 | 3.215 | 1 |
| 2098 | PHF6    | ENST00000394292 | p.G214V  | c.641  | Extended PHD2 domain (ePHD2)           | 0.040695131 | 4.619 | 1 |
| 2098 | PHF6    | ENST00000394292 | p.C243Y  | c.728  | Extended PHD2 domain (ePHD2)           | 0.009284243 | 6.751 | 1 |
| 2098 | PHF6    | ENST00000394292 | p.G288V  | c.863  | Extended PHD2 domain (ePHD2)           | 0.049979374 | 0     | 1 |
| 2115 | NPM1    | ENST00000517671 | p.P216S  | c.646  | NULL                                   | 0.004903406 | 0     | 1 |
| 2115 | NPM1    | ENST00000517671 | p.K257E  | c.769  | N6-acetylysine                         | 0.004903406 | 7.672 | 1 |
| 2117 | NF1     | ENST00000358273 | p.A928V  | c.2783 | NULL                                   | 0.016153605 | 5.952 | 1 |



|      |        |                 |                        |             |                                          |             |       |   |
|------|--------|-----------------|------------------------|-------------|------------------------------------------|-------------|-------|---|
| 2117 | NF1    | ENST00000358273 | p.P931L                | c.2792      | NULL                                     | 0.017145812 | 5.866 | 1 |
| 2117 | NF1    | ENST00000358273 | p.K1040N               | c.3120      | NULL                                     | 0.033299417 | 0     | 1 |
| 2135 | MSH6   | ENST00000234420 | p.K99N                 | c.297       | PWWP.                                    | 0.007823338 | 0     | 1 |
| 2135 | MSH6   | ENST00000234420 | p.R128H                | c.383       | PWWP.                                    | 0.007823338 | 6.998 | 1 |
| 2298 | MSH6   | ENST00000234420 | p.S950I                | c.2849      | NULL                                     | 0.008332701 | 0     | 1 |
| 2298 | MSH6   | ENST00000234420 | p.R976H                | c.2927      | NULL                                     | 0.008332701 | 6.907 | 1 |
| 2301 | SETD2  | ENST00000409792 | p.Y1666H               | c.4996      | SET.                                     | 0.596684188 | 2.889 | 1 |
| 2301 | SETD2  | ENST00000409792 | p.D1665V               | c.4994      | SET.                                     | 0.348411053 | 3.179 | 1 |
| 2301 | SETD2  | ENST00000409792 | p.F1650S               | c.4949      | SET.                                     | 1.177831968 | 9.268 | 1 |
| 2301 | SETD2  | ENST00000409792 | p.F1650V               | c.4948      | SET.                                     | 1.177831968 | 9.268 | 1 |
| 2301 | SETD2  | ENST00000409792 | p.H1629Y               | c.4885      | S-adenosyl-L-methionine binding          | 2.269144569 | 0     | 3 |
| 2301 | SETD2  | ENST00000409792 | p.M1627R               | c.4880      | SET.                                     | 0.380307784 | 5.609 | 1 |
| 2390 | NOTCH1 | ENST00000277541 | p.S1951N               | c.5852      | HIF1AN-binding.                          | 0.094015412 | 0     | 1 |
| 2390 | NOTCH1 | ENST00000277541 | p.N1922S               | c.5765      | Cytoplasmic.                             | 0.020717389 | 5.697 | 1 |
| 2390 | NOTCH1 | ENST00000277541 | p.L1920P               | c.5759      | Cytoplasmic.                             | 0.076179452 | 3.742 | 1 |
| 2434 | PAX5   | ENST00000358127 | p.P130S                | c.388       | Paired.                                  | 0.003215796 | 0     | 1 |
| 2434 | PAX5   | ENST00000358127 | p.E97D                 | c.291       | Paired.                                  | 0.001411065 | 9.469 | 1 |
| 2434 | PAX5   | ENST00000358127 | p.P93Q                 | c.279_278   | Paired.                                  | 0.001804732 | 9.114 | 1 |
| 2517 | FBXW7  | ENST00000603548 | p.R689Q                | c.2066      | NULL                                     | 4.039757703 | 0     | 1 |
| 2517 | FBXW7  | ENST00000603548 | p.R689W                | c.2065      | NULL                                     | 4.039757703 | 0     | 4 |
| 2517 | FBXW7  | ENST00000603548 | p.G669V                | c.2006      | NULL                                     | 0.055166593 | 9.149 | 1 |
| 2517 | FBXW7  | ENST00000603548 | p.D642G                | c.1925      | WD 7                                     | 0.236340355 | 4.718 | 1 |
| 2652 | MAP2K4 | ENST00000415385 | p.D107V                | c.320       | NULL                                     | 0.008099227 | 6.948 | 1 |
| 2652 | MAP2K4 | ENST00000415385 | p.P134Q                | c.401       | Protein kinase.                          | 0.008099227 | 0     | 1 |
| 2730 | NPM1   | ENST00000517671 | p.D55N                 | c.163       | Interaction between pentamers            | 0.003966274 | 0     | 1 |
| 2730 | NPM1   | ENST00000517671 | p.S106L                | c.317       | Necessary for interaction with APEX1     | 0.003966274 | 7.978 | 1 |
| 2849 | PTEN   | ENST00000371953 | p.F215S                | c.644       | C2 tensin-type.                          | 0.082412101 | 4.601 | 1 |
| 2849 | PTEN   | ENST00000371953 | p.V255in_frame_del     | c.762_764   | C2 tensin-type.                          | 1.04120605  | 0     | 1 |
| 2849 | PTEN   | ENST00000371953 | p.V255G                | c.764       | C2 tensin-type.                          | 1.04120605  | 0     | 1 |
| 2879 | KDM6A  | ENST00000382899 | p.N1158S               | c.3473      | JmjC.                                    | 0.158219574 | 2.66  | 1 |
| 2879 | KDM6A  | ENST00000382899 | p.R1262W               | c.3784      | JmjC.                                    | 0.158219574 | 0     | 1 |
| 2931 | RB1    | ENST00000267163 | p.M379L                | c.1135      | Domain A                                 | 0.054695593 | 6.384 | 1 |
| 2931 | RB1    | ENST00000267163 | p.Y659F                | c.1976      | Domain B                                 | 0.107430937 | 0     | 1 |
| 2931 | RB1    | ENST00000267163 | p.I782M                | c.2346      | Domain C; mediates interaction with E4F1 | 0.096600311 | 3.389 | 1 |
| 2975 | NF2    | ENST00000338641 | p.Y221C                | c.662       | FERM.                                    | 0.00626704  | 0     | 1 |
| 2975 | NF2    | ENST00000338641 | p.D245G                | c.734       | FERM.                                    | 0.00626704  | 7.318 | 1 |
| 3031 | NOTCH1 | ENST00000277541 | p.C449Y                | c.1346      | NULL                                     | 0.040971118 | 5.458 | 1 |
| 3031 | NOTCH1 | ENST00000277541 | p.R448L                | c.1343      | EGF-like 11; calcium-binding             | 0.149524449 | 2.774 | 1 |
| 3031 | NOTCH1 | ENST00000277541 | p.P422S                | c.1264      | EGF-like 11; calcium-binding             | 0.168948295 | 0     | 1 |
| 3196 | B2M    | ENST00000544417 | p.L15F                 | c.43        | NULL                                     | 0.082640913 | 3.597 | 1 |
| 3196 | B2M    | ENST00000544417 | p.Y98C                 | c.293       | Glycolipid Ig-like C1-type               | 0.082640913 | 0     | 1 |
| 3202 | CASP8  | ENST00000358485 | p.G421E                | c.1262      | NULL                                     | 0.124653906 | 3.004 | 1 |
| 3202 | CASP8  | ENST00000358485 | p.V469A                | c.1406      | Interaction with caspase-8 NULL          | 0.124653906 | 0     | 1 |
| 3265 | NOTCH1 | ENST00000277541 | p.2439in_frame_insG    | c.7314_7313 | EGF-like 11; calcium-binding             | 0.008887541 | 0     | 1 |
| 3265 | NOTCH1 | ENST00000277541 | p.C416F                | c.1247      | NULL                                     | 0.008887541 | 6.814 | 1 |
| 3350 | PBRM1  | ENST00000296302 | p.M731K                | c.2192      | Bromo 5.                                 | 0.04972103  | 4.33  | 1 |
| 3350 | PBRM1  | ENST00000296302 | p.I709T                | c.2126      | Bromo 5.                                 | 0.04972103  | 0     | 1 |
| 3405 | EP300  | ENST00000263253 | p.R1076C               | c.3226      | Bromo.                                   | 0.018607138 | 5.748 | 1 |
| 3405 | EP300  | ENST00000263253 | p.T1101I               | c.3302      | Bromo.                                   | 0.018607138 | 0     | 1 |
| 3417 | PIK3R1 | ENST00000396611 | p.G376R                | c.1126      | C2 PI3K-type. SH2 1.                     | 7.072293011 | 0     | 8 |
| 3417 | PIK3R1 | ENST00000396611 | p.452in_frame_insY     | c.1353_1354 | C2 PI3K-type. SH2 1.                     | 0.578344092 | 3.79  | 1 |
| 3435 | CDKN2A | ENST00000361570 | p.GAAGR157in_frame_del | c.479_465   | ANK 3                                    | 0.045310839 | 4.464 | 1 |
| 3435 | CDKN2A | ENST00000361570 | p.L127V                | c.379       | ANK 2                                    | 0.045310839 | 0     | 1 |

|      |        |                 |                       |           |                                      |             |       |   |
|------|--------|-----------------|-----------------------|-----------|--------------------------------------|-------------|-------|---|
| 3444 | NOTCH1 | ENST00000277541 | p.A1705V              | c.5114    | Extracellular.                       | 0.123218133 | 0     | 1 |
| 3444 | NOTCH1 | ENST00000277541 | p.W1487C              | c.4461    | LNR 1                                | 0.091408926 | 3.501 | 1 |
| 3444 | NOTCH1 | ENST00000277541 | p.N1484I              | c.4451    | LNR 1                                | 0.037972854 | 4.841 | 1 |
| 3711 | NF2    | ENST00000338641 | p.IKDTV68in_frame_del | c.202_219 | FERM.                                | 0.065880714 | 3.924 | 1 |
| 3711 | NF2    | ENST00000338641 | p.R291C               | c.871     | FERM.                                | 0.065880714 | 0     | 1 |
| 3712 | RB1    | ENST00000267163 | p.N290H               | c.868     | NULL                                 | 0.082469244 | 0     | 1 |
| 3712 | RB1    | ENST00000267163 | p.E440K               | c.1318    | Domain A                             | 0.082469244 | 3.6   | 1 |
| 3808 | APC    | ENST00000457016 | p.W593L               | c.1778    | Leu-rich NULL                        | 0.023003545 | 5.442 | 1 |
| 3808 | APC    | ENST00000457016 | p.R640W               | c.1918    | Leu-rich                             | 0.023003545 | 0     | 1 |
| 3867 | MAP2K4 | ENST00000415385 | p.R298H               | c.893     | Protein kinase.                      | 1.073106968 | 0     | 2 |
| 3867 | MAP2K4 | ENST00000415385 | p.V301F               | c.901     | Protein kinase.                      | 0.112380123 | 7.257 | 1 |
| 3867 | MAP2K4 | ENST00000415385 | p.P367S               | c.1099    | Protein kinase.                      | 0.242503871 | 3.909 | 1 |
| 4038 | CREBBP | ENST00000262367 | p.D1143H              | c.3427    | Interaction with histone             | 0.329191731 | 1.603 | 1 |
| 4038 | CREBBP | ENST00000262367 | p.R1091C              | c.3271    | NULL                                 | 0.329191731 | 0     | 1 |
| 4095 | APC    | ENST00000457016 | p.S568N               | c.1703    | Leu-rich                             | 0.008949359 | 0     | 1 |
| 4095 | APC    | ENST00000457016 | p.D605N               | c.1813    | Leu-rich                             | 0.008949359 | 6.804 | 1 |
| 4106 | NF2    | ENST00000338641 | p.C133Y               | c.398     | FERM.                                | 0.007134361 | 0     | 1 |
| 4106 | NF2    | ENST00000338641 | p.P246L               | c.737     | FERM.                                | 0.007134361 | 7.131 | 1 |
| 4113 | FBXW7  | ENST00000603548 | p.R658Q               | c.1973    | WD 7                                 | 1.184795304 | 0     | 2 |
| 4113 | FBXW7  | ENST00000603548 | p.G368E               | c.1103    | NULL                                 | 0.369590608 | 2.436 | 1 |
| 4133 | PBRM1  | ENST00000296302 | p.F280V               | c.838     | NULL                                 | 0.569795433 | 0     | 1 |
| 4133 | PBRM1  | ENST00000296302 | p.I252R               | c.755     | Bromo 2.                             | 0.312956424 | 2.154 | 1 |
| 4133 | PBRM1  | ENST00000296302 | p.I245F               | c.733     | Bromo 2.                             | 0.389772408 | 1.761 | 1 |
| 4133 | PBRM1  | ENST00000296302 | p.K231R               | c.692     | Bromo 2.                             | 0.013834508 | 8.622 | 1 |
| 4133 | PBRM1  | ENST00000296302 | p.A192T               | c.574     | NULL                                 | 0.065145859 | 4.544 | 1 |
| 4133 | PBRM1  | ENST00000296302 | p.E184D               | c.552     | NULL                                 | 0.021493195 | 7.746 | 1 |
| 4261 | NOTCH1 | ENST00000277541 | p.P2064L              | c.6191    | ANK 5 NULL                           | 1.109196612 | 0     | 2 |
| 4261 | NOTCH1 | ENST00000277541 | p.A2036V              | c.6107    | ANK 4 NULL                           | 0.218393224 | 3.195 | 1 |
| 4364 | MSH6   | ENST00000234420 | p.E956D               | c.2868    | NULL                                 | 0.029076552 | 0     | 1 |
| 4364 | MSH6   | ENST00000234420 | p.L979V               | c.2935    | NULL                                 | 0.029076552 | 5.104 | 1 |
| 4368 | SMAD4  | ENST00000342988 | p.A327V               | c.980     | MH2.                                 | 0.067358322 | 3.892 | 1 |
| 4368 | SMAD4  | ENST00000342988 | p.W524C               | c.1572    | MH2.                                 | 0.067358322 | 0     | 1 |
| 4384 | RB1    | ENST00000267163 | p.S127I               | c.380     | NULL                                 | 0.009631659 | 0     | 1 |
| 4384 | RB1    | ENST00000267163 | p.M148T               | c.443     | NULL                                 | 0.009631659 | 6.698 | 1 |
| 4632 | NPM1   | ENST00000517671 | p.K32E                | c.94      | N6-acetyllysine                      | 0.007726335 | 0     | 1 |
| 4632 | NPM1   | ENST00000517671 | p.V99A                | c.296     | Necessary for interaction with APEX1 | 0.007726335 | 7.016 | 1 |
| 4657 | NF1    | ENST00000358273 | p.K1568R              | c.4703    | NULL                                 | 0.01594226  | 0     | 1 |
| 4657 | NF1    | ENST00000358273 | p.G1668V              | c.5003    | Lipid binding                        | 0.01594226  | 5.971 | 1 |
| 4850 | MAP2K4 | ENST00000415385 | p.S195L               | c.584     | Protein kinase.                      | 1.016676958 | 6.906 | 2 |
| 4850 | MAP2K4 | ENST00000415385 | p.L396V               | c.1186    | DVD domain                           | 1.016676958 | 0     | 1 |
| 4850 | MAP2K4 | ENST00000415385 | p.L396P               | c.1187    | DVD domain                           | 1.016676958 | 0     | 1 |
| 4862 | NF1    | ENST00000358273 | p.Q1617H              | c.4851    | Lipid binding                        | 0.027814867 | 6.168 | 1 |
| 4862 | NF1    | ENST00000358273 | p.D1837N              | c.5509    | Lipid binding                        | 1.013907433 | 0     | 2 |
| 4994 | NOTCH1 | ENST00000277541 | p.G484V               | c.1451    | EGF-like 12; calcium-binding         | 0.056289124 | 4.151 | 1 |
| 4994 | NOTCH1 | ENST00000277541 | p.C461Y               | c.1382    | NULL                                 | 0.056289124 | 0     | 1 |
| 5002 | SETD2  | ENST00000409792 | p.H1603R              | c.4808    | S-adenosyl-L-methionine binding      | 0.199990032 | 3.322 | 1 |
| 5002 | SETD2  | ENST00000409792 | p.K1560N              | c.4680    | S-adenosyl-L-methionine binding      | 1.099995016 | 0     | 1 |
| 5002 | SETD2  | ENST00000409792 | p.K1560R              | c.4679    | S-adenosyl-L-methionine binding      | 1.099995016 | 0     | 1 |
| 5122 | RB1    | ENST00000267163 | p.A488V               | c.1463    | Domain A                             | 0.008644511 | 6.854 | 1 |
| 5122 | RB1    | ENST00000267163 | p.L550I               | c.1648    | Domain A                             | 0.008644511 | 0     | 1 |
| 5359 | SETD2  | ENST00000409792 | p.D2007Y              | c.6019    | NULL                                 | 0.03742121  | 0     | 1 |
| 5359 | SETD2  | ENST00000409792 | p.P1979L              | c.5936    | NULL                                 | 0.03742121  | 4.74  | 1 |
| 5462 | MEN1   | ENST00000443283 | p.A442D               | c.1325    | NULL                                 | 0.008206598 | 0     | 1 |

|      |        |                 |                     |             |                              |             |       |   |
|------|--------|-----------------|---------------------|-------------|------------------------------|-------------|-------|---|
| 5462 | MEN1   | ENST00000443283 | p.E413Q             | c.1237      | NULL                         | 0.008206598 | 6.929 | 1 |
| 5549 | MSH6   | ENST00000234420 | p.E1254in_frame_del | c.3759_3761 | NULL                         | 0.13221887  | 0     | 1 |
| 5549 | MSH6   | ENST00000234420 | p.R1331Q            | c.3992      | NULL                         | 0.13221887  | 2.919 | 1 |
| 5597 | PHF6   | ENST00000394292 | p.C293S             | c.878       | Extended PHD2 domain (ePHD2) | 0.009868182 | 6.663 | 1 |
| 5597 | PHF6   | ENST00000394292 | p.K300N             | c.900       | Extended PHD2 domain (ePHD2) | 0.097328086 | 3.361 | 1 |
| 5597 | PHF6   | ENST00000394292 | p.N329Y             | c.985       | Extended PHD2 domain (ePHD2) | 0.107196268 | 0     | 1 |
| 5678 | ARID1B | ENST00000367148 | p.K1099N            | c.3297      | NULL                         | 0.051724801 | 0     | 1 |
| 5678 | ARID1B | ENST00000367148 | p.L1130V            | c.3388      | ARID.                        | 0.051724801 | 4.273 | 1 |

**Supplementary Table 9. Intra-molecular clusters with at least 50% specificity to one cancer type**

---

| <b>Cluster with Centroid</b> | <b>Cancer Type</b> | <b>Specificity</b> |
|------------------------------|--------------------|--------------------|
| VHL:L89                      | KIRC               | 0.95               |
| DNMT3A:R882                  | LAML               | 0.91304348         |
| MTOR:C1483                   | KIRC               | 0.85714286         |
| FLT3:D835                    | LAML               | 0.84210526         |
| EGFR:A289                    | GBM                | 0.80392157         |
| IDH1:R132                    | LGG                | 0.71666667         |
| IDH2:R140                    | LAML               | 0.7037037          |
| PIK3CA:H1047                 | BRCA               | 0.68965517         |
| EGFR:L858                    | LUAD               | 0.68               |
| MAP2K1:P124                  | SKCM               | 0.66666667         |
| PTEN:R130                    | UCEC               | 0.63809524         |
| BRAF:V600                    | THCA               | 0.58899676         |
| PPP2R1A:P179                 | UCEC               | 0.57142857         |
| C6:R145                      | SKCM               | 0.57142857         |
| PIK3CA:R88                   | UCEC               | 0.54054054         |
| RAC1:P29                     | SKCM               | 0.52631579         |
| RUNX1:R162                   | LAML               | 0.5                |
| MTOR:F1888                   | UCEC               | 0.5                |

**Supplementary Table 10. Inter-molecular clusters with at least 50% specificity to one cancer type**

| <b>Inter-Molecular Cluster</b> | <b>Cancer Type</b> | <b>Specificity</b> |
|--------------------------------|--------------------|--------------------|
| ASB9,SOCS4,TCEB1,VHL           | KIRC               | 0.8                |
| PLXNB1,RAC1                    | SKCM               | 0.76923077         |
| BTRC,CTNNB1                    | UCEC               | 0.70588235         |
| H2AFY,SPOP                     | PRAD               | 0.6                |
| AKAP13,ARHGEF12,RHOA           | HNSC               | 0.57142857         |
| PPP2R1A,PPP2R2A                | UCEC               | 0.53846154         |
| NR1I3,PPARG                    | UCEC               | 0.5                |
| CBFB,RUNX1                     | BRCA               | 0.5                |

**Supplementary Table 11. Experimental validation for predicted functional rare driver mutations**

| <b>Rare mutations found in intra-molecular clusters</b>                  |                 |                                       |                                                                                                                                                                                                                                                                                                                                                                                                                                                                                                                                                                                                                  |                                                                                                                                                                                                             |
|--------------------------------------------------------------------------|-----------------|---------------------------------------|------------------------------------------------------------------------------------------------------------------------------------------------------------------------------------------------------------------------------------------------------------------------------------------------------------------------------------------------------------------------------------------------------------------------------------------------------------------------------------------------------------------------------------------------------------------------------------------------------------------|-------------------------------------------------------------------------------------------------------------------------------------------------------------------------------------------------------------|
| Gene in Cluster                                                          | Centroid        | Rare Mutation                         | Evidence of Functionality                                                                                                                                                                                                                                                                                                                                                                                                                                                                                                                                                                                        | Citation                                                                                                                                                                                                    |
| IDH1                                                                     | R132            | R109                                  | Mutation leads to reorganization of active site, leads to loss of enzymatic function for oxidative decarboxylation of isocitrate, and gain of function for NADPH-dependent reduction of $\alpha$ -ketoglutarate.<br>3T3 (recombinant retroviruses with mutants in mouse 3T3 fibroblasts) cells were injected into the shoulder of nu/nu mice. At 3 weeks after the injection, the R47Q mutant but not wild-type MAP2K1, generated palpable tumors at every injection site. Additionally, R47Q led to increased phosphorylation of downstream kinases ERK1/2, supporting the activating potential of the mutation | <a href="http://www.ncbi.nlm.nih.gov/pmc/articles/PMC3194054/">http://www.ncbi.nlm.nih.gov/pmc/articles/PMC3194054/</a>                                                                                     |
| MAP2K1                                                                   | P124            | R47Q                                  | Mutations strongly increase phosphorylation of all signaling proteins in 3 different cell lines, indicating that these are activating mutation. NIH3T3-HER2 D769H-mutant cell lines had more rapid tumor growth than the HER2 WT control.                                                                                                                                                                                                                                                                                                                                                                        | <a href="http://carcin.oxfordjournals.org/content/33/5/956.long">http://carcin.oxfordjournals.org/content/33/5/956.long</a>                                                                                 |
| ERBB2                                                                    | V842            | D769H, D769Y                          |                                                                                                                                                                                                                                                                                                                                                                                                                                                                                                                                                                                                                  | <a href="http://cancerdiscovery.aacrjournals.org/content/early/2012/12/04/2159-8290.CD-12-0349.abstract">http://cancerdiscovery.aacrjournals.org/content/early/2012/12/04/2159-8290.CD-12-0349.abstract</a> |
| <b>Rare/medium recurrent mutations found in inter-molecular clusters</b> |                 |                                       |                                                                                                                                                                                                                                                                                                                                                                                                                                                                                                                                                                                                                  |                                                                                                                                                                                                             |
| Genes in Cluster                                                         | Hotspots        | Rare Mutation                         | Evidence of Functionality                                                                                                                                                                                                                                                                                                                                                                                                                                                                                                                                                                                        | Citation                                                                                                                                                                                                    |
| KEAP1/NFE2L2                                                             | NFE2L2: E79,E82 | KEAP1:R415C/H, R483C/H                | Both mutations are located in the KEAP1 binding pocket and play a major role in the stability of the KEAP1/NFE2L2 complex.                                                                                                                                                                                                                                                                                                                                                                                                                                                                                       | <a href="http://www.ncbi.nlm.nih.gov/pmc/articles/PMC1538563/">http://www.ncbi.nlm.nih.gov/pmc/articles/PMC1538563/</a>                                                                                     |
| VHL/TCEB1                                                                | VHL: L158       | Y79F/N/S                              | Experimentally validated to disrupt complex                                                                                                                                                                                                                                                                                                                                                                                                                                                                                                                                                                      | <a href="http://www.ncbi.nlm.nih.gov/pubmed/23797736">http://www.ncbi.nlm.nih.gov/pubmed/23797736</a>                                                                                                       |
| SMAD2/SMAD3/SMAD4                                                        | NA              | SMAD2: P305L/Q, D300N, SMAD3: R268C/H | Destabilize SMAD2/4 and SMAD3/4 complexes                                                                                                                                                                                                                                                                                                                                                                                                                                                                                                                                                                        | <a href="http://www.ncbi.nlm.nih.gov/pubmed/23139211">http://www.ncbi.nlm.nih.gov/pubmed/23139211</a>                                                                                                       |
| SMAD2/SMAD3/SMAD4                                                        | SMAD4: R361     | SMAD2: D450N, S276L                   | Destabilize SMAD complexes                                                                                                                                                                                                                                                                                                                                                                                                                                                                                                                                                                                       | <a href="http://www.ncbi.nlm.nih.gov/pubmed/23139211">http://www.ncbi.nlm.nih.gov/pubmed/23139211</a>                                                                                                       |
| DNMT3A/DNMT3L                                                            | NA              | DNMT3L: F261L                         | Mutation at this residue causes the complex to lose its ability to form a homodimer and its ability to stimulate wild-type Dnmt3a2 activity.                                                                                                                                                                                                                                                                                                                                                                                                                                                                     | <a href="http://www.nature.com/nature/journal/v449/n7159/full/nature06146.html">http://www.nature.com/nature/journal/v449/n7159/full/nature06146.html</a>                                                   |
| <b>Rare mutations found in drug-mutation clusters</b>                    |                 |                                       |                                                                                                                                                                                                                                                                                                                                                                                                                                                                                                                                                                                                                  |                                                                                                                                                                                                             |
| Gene in Cluster                                                          | Rare Mutation   | Predicted Drug                        | Known Drug                                                                                                                                                                                                                                                                                                                                                                                                                                                                                                                                                                                                       | Database Source                                                                                                                                                                                             |
| ERBB3                                                                    | G284R           | NAG molecule                          | trastuzumab,pertuzumab,lapatinib,anti-HER3 mAbs, PI3K pathway inhibitors + MEK inhibitors                                                                                                                                                                                                                                                                                                                                                                                                                                                                                                                        | SAGE                                                                                                                                                                                                        |
| BRAF                                                                     | D594G           | Sorafenib                             | Sorafenib                                                                                                                                                                                                                                                                                                                                                                                                                                                                                                                                                                                                        | SAGE                                                                                                                                                                                                        |
| BRAF                                                                     | G469A           | Sorafenib                             | EGFR TKIs + MEK inhibitors + anti-EGFR mAbs                                                                                                                                                                                                                                                                                                                                                                                                                                                                                                                                                                      | cancerDR, SAGE                                                                                                                                                                                              |
| EGFR                                                                     | G719A           | Gefitinib                             | MEK inhibitors, afatinib+cetuximab, erlotinib, afatinib, HSP90 inhibitors                                                                                                                                                                                                                                                                                                                                                                                                                                                                                                                                        | MyCancerGenome, SAGE                                                                                                                                                                                        |
| EGFR                                                                     | G719D           | Gefitinib                             | MEK inhibitors, afatinib+cetuximab, erlotinib, afatinib, HSP90 inhibitors                                                                                                                                                                                                                                                                                                                                                                                                                                                                                                                                        | SAGE                                                                                                                                                                                                        |
| PRKCI                                                                    | D396E           | adenosine                             | Bryostatins                                                                                                                                                                                                                                                                                                                                                                                                                                                                                                                                                                                                      | cancerDR                                                                                                                                                                                                    |



**Supplementary Table 13. Inter-molecular clusters with hotspot residues and potential novel functional mutations**

| Cluster ID | Proteins in Cluster   | Protein   | Transcript (Ensembl74) | Hotspot Residues                        | Novel Functional Mutations                                                                                                                                                                                                                                                                                  |
|------------|-----------------------|-----------|------------------------|-----------------------------------------|-------------------------------------------------------------------------------------------------------------------------------------------------------------------------------------------------------------------------------------------------------------------------------------------------------------|
| 89         | KEAF1,NFE2L2          | KEAF1     | ENST00000039623        | NA                                      | p.G332S,p.R45C,p.R45H,p.G477S,p.R483C,p.R483H,p.G509W,p.G524C,p.G527F,p.G603W                                                                                                                                                                                                                               |
| 89         | KEAF1,NFE2L2          | NFE2L2    | ENST00000039702        | E79,E82                                 | p.D77G,p.T80K,p.T80P,p.T80R                                                                                                                                                                                                                                                                                 |
| 35         | PLXNB1,RAC1           | PLXNB1    | ENST00000296440        | NA                                      | p.D1736N                                                                                                                                                                                                                                                                                                    |
| 35         | PLXNB1,RAC1           | RAC1      | ENST00000350142        | P29                                     | NA                                                                                                                                                                                                                                                                                                          |
| 0          | ASB9,SOCS4,TCEB1,VHL  | ASB9      | ENST00000080488        | NA                                      | p.S257P                                                                                                                                                                                                                                                                                                     |
| 0          | ASB9,SOCS4,TCEB1,VHL  | SOCS4     | ENST00000395472        | NA                                      | p.R383W                                                                                                                                                                                                                                                                                                     |
| 0          | ASB9,SOCS4,TCEB1,VHL  | TCEB1     | ENST00000522337        | NA                                      | p.S67L,p.Y79F,p.Y79N,p.Y79S,p.R82C,p.S86G                                                                                                                                                                                                                                                                   |
| 0          | ASB9,SOCS4,TCEB1,VHL  | VHL       | ENST00000256714        | L158                                    | p.G114R,p.L153P,p.C162F,p.C162K,p.C162Y,p.V165D,p.S168C,p.L169P                                                                                                                                                                                                                                             |
| 438        | MAX,MYC               | MAX       | ENST00000358664        | R60                                     | NA                                                                                                                                                                                                                                                                                                          |
| 438        | MAX,MYC               | MYC       | ENST00000377970        | NA                                      | p.E384K                                                                                                                                                                                                                                                                                                     |
| 87         | SMAD2,SMAD3,SMAD4     | SMAD2     | ENST00000402690        | NA                                      | p.S276L,p.L442V,p.L446V,p.D450N                                                                                                                                                                                                                                                                             |
| 87         | SMAD2,SMAD3,SMAD4     | SMAD3     | ENST00000377507        | NA                                      | p.Q405L                                                                                                                                                                                                                                                                                                     |
| 87         | SMAD2,SMAD3,SMAD4     | SMAD4     | ENST00000342988        | R361                                    | p.D355G,p.P356L,p.S357P                                                                                                                                                                                                                                                                                     |
| 20         | PIK3CA,PIK3R1         | PIK3CA    | ENST00000263967        | V344,N345,D350,C420,E453                | p.R412Q,p.PVPHGLEDEL447n frame del.p.P449L,p.HGLEDLNLP450n frame del.p.G451R,p.G451V,p.D454Y,p.P471A,p.P471L                                                                                                                                                                                                |
| 20         | PIK3CA,PIK3R1         | PIK3R1    | ENST00000395611        | NSKPS6AT,K367,R574                      | p.SRSTQ460n frame del.p.D464N,p.D464V,p.DRL1464n frame del.p.RL1465n frame del.p.EIDK558n frame del.p.I559Y,p.I559V,p.D560Q,p.D560K,p.MNS63n frame del.p.MNSKPOL563n frame del.p.P568T,p.LUQLKTRD570n frame del.p.IQLKTR571n frame del.p.Q572R,p.KT575n frame del.p.KT575n frame del.p.KTROQV575n frame del |
| 109        | PPP2R1A,PPP2R2A       | PPP2R1A   | ENST00000312088        | R258                                    | p.R221W,p.S256F,p.S256Y,p.W257C,p.R260C                                                                                                                                                                                                                                                                     |
| 109        | PPP2R1A,PPP2R2A       | PPP2R2A   | ENST00000315985        | NA                                      | p.M266I                                                                                                                                                                                                                                                                                                     |
| 216        | GRB14,HRAS,RASA1,SOS1 | GRB14     | ENST00000263915        | NA                                      | p.H147Y                                                                                                                                                                                                                                                                                                     |
| 216        | GRB14,HRAS,RASA1,SOS1 | HRAS      | ENST00000311889        | G12,G13,Q61                             | p.A310,p.D33N                                                                                                                                                                                                                                                                                               |
| 216        | GRB14,HRAS,RASA1,SOS1 | RASA1     | ENST00000274376        | NA                                      | p.R789L,p.R789Q,p.N942H                                                                                                                                                                                                                                                                                     |
| 216        | GRB14,HRAS,RASA1,SOS1 | SOS1      | ENST00000426016        | NA                                      | p.E966Q                                                                                                                                                                                                                                                                                                     |
| 232        | BTIRC,CTNNB1          | BTIRC     | ENST00000370187        | NA                                      | p.R322Q                                                                                                                                                                                                                                                                                                     |
| 232        | BTIRC,CTNNB1          | CTNNB1    | ENST00000349496        | D32                                     | p.L31M                                                                                                                                                                                                                                                                                                      |
| 10         | NR113,PPARG,RXRA      | NR113     | ENST00000367980        | NA                                      | p.D291N,p.R329W                                                                                                                                                                                                                                                                                             |
| 10         | NR113,PPARG,RXRA      | PPARG     | ENST00000287820        | NA                                      | p.E352K,p.T468A                                                                                                                                                                                                                                                                                             |
| 10         | NR113,PPARG,RXRA      | RXRA      | ENST00000481739        | S427                                    | p.R421H,p.R426H,p.G429V                                                                                                                                                                                                                                                                                     |
| 66         | PIK3CA,PIK3R1         | PIK3CA    | ENST00000263967        | E542,E545,Q546                          | p.G364R,p.E365K,p.E365V,p.P366R,p.E547D,p.E547K,p.D1029H                                                                                                                                                                                                                                                    |
| 66         | PIK3CA,PIK3R1         | PIK3R1    | ENST00000395611        | G376                                    | p.K379E,p.K379N,p.L380n frame del.p.452n frame insY,p.460n frame insX,p.461n frame insX,p.463n frame insY,p.463n frame insY               |
| 19         | TP53,TP53BP1,TP53BP2  | TP53      | ENST00000485888        | Y163,S241,C242,G244,G245,R248,R249,P250 | p.H168L,p.H168P,p.H168R,p.E171K,p.M246L,p.M246R,p.N247I                                                                                                                                                                                                                                                     |
| 19         | TP53,TP53BP1,TP53BP2  | TP53BP1   | ENST00000382044        | NA                                      | p.V184K,p.V186M                                                                                                                                                                                                                                                                                             |
| 19         | TP53,TP53BP1,TP53BP2  | TP53BP2   | ENST00000343537        | NA                                      | p.D956H                                                                                                                                                                                                                                                                                                     |
| 267        | AKAP13,ARHGFEF12,RHOA | AKAP13    | ENST00000361243        | NA                                      | p.R2015H                                                                                                                                                                                                                                                                                                    |
| 267        | AKAP13,ARHGFEF12,RHOA | ARHGFEF12 | ENST00000397843        | NA                                      | p.R800I                                                                                                                                                                                                                                                                                                     |
| 267        | AKAP13,ARHGFEF12,RHOA | RHOA      | ENST00000418115        | E40                                     | NA                                                                                                                                                                                                                                                                                                          |



**Supplementary Table 14. Intra-molecular clusters with medium recurrent novel functional mutations**

---

| <b>Cluster ID</b> | <b>Protein</b> | <b>Transcript (Ensembl74)</b> | <b>Novel Functional Mutations</b>                                       |
|-------------------|----------------|-------------------------------|-------------------------------------------------------------------------|
| 1229              | CA3            | ENST00000285381               | p.L95F,p.G98C,p.F159L,p.R226L,p.R226Q,p.R226W                           |
| 102               | PTPN11         | ENST00000351677               | p.V428M,p.I463L,p.T468M,p.Q510H,p.Q510L                                 |
| 299               | RUNX1          | ENST00000300305               | p.P113L,p.P113S,p.V118A,p.A134P,p.D160G,p.L161P,p.R162G,p.R162K,p.R162S |
| 2772              | MTOR           | ENST00000361445               | p.A1459P,p.L1460P,p.C1483F,p.C1483R,p.C1483Y                            |
| 5272              | PI3            | ENST00000243924               | p.R82W,p.A84P,p.A84T,p.A84V,p.C109Y                                     |

**Supplementary Table 15. Inter-molecular clusters with medium recurrent novel functional mutations**

| Cluster ID | Proteins in Cluster           | Protein   | Transcript (Ensembl74) | Novel Functional Mutations                                              |
|------------|-------------------------------|-----------|------------------------|-------------------------------------------------------------------------|
| 55         | DOCK2,RAC1,VAV1               | DOCK2     | ENST00000256935        | p.L1531P,p.G1533E,p.I1534S,p.V1539F                                     |
| 55         | DOCK2,RAC1,VAV1               | RAC1      | ENST00000356142        | p.G155S,p.C18F,p.C18Y,p.N39S,p.Y40S,p.Q61R                              |
| 55         | DOCK2,RAC1,VAV1               | VAV1      | ENST00000602142        | p.M330I                                                                 |
| 73         | CUL1,GLMN,RBX1                | CUL1      | ENST00000602748        | p.E499D,p.R506H,p.R506S,p.D510G,p.G543R,p.G543W,p.R577Q,p.E758D,p.E758Q |
| 73         | CUL1,GLMN,RBX1                | GLMN      | ENST00000370360        | p.P376S                                                                 |
| 73         | CUL1,GLMN,RBX1                | RBX1      | ENST00000216225        | p.M50I,p.M50V,p.A61V,p.T90I                                             |
| 385        | DNMT3A,DNMT3L                 | DNMT3A    | ENST00000321117        | p.R720H,p.R729Q,p.R729W                                                 |
| 385        | DNMT3A,DNMT3L                 | DNMT3L    | ENST00000270172        | p.F261L                                                                 |
| 272        | SMAD2,SMAD3,SMAD4             | SMAD2     | ENST00000402690        | p.D300N,p.D304G,p.P305L,p.P305Q                                         |
| 272        | SMAD2,SMAD3,SMAD4             | SMAD3     | ENST00000327367        | p.R268C,p.R268H                                                         |
| 272        | SMAD2,SMAD3,SMAD4             | SMAD4     | ENST00000342988        | p.R531Q,p.L533R,p.D537E,p.D537G,p.D537V,p.D537Y                         |
| 81         | IL21,IL21R                    | IL21      | ENST00000264497        | p.D33Y,p.R34C,p.R34S,p.R40H,p.R40S                                      |
| 81         | IL21,IL21R                    | IL21R     | ENST00000395755        | p.Q211R                                                                 |
| 2          | HIST1H2AE,HIST1H2BA,HIST1H2BJ | HIST1H2AE | ENST00000303910        | p.A22T,p.A22V,p.A53V                                                    |
| 2          | HIST1H2AE,HIST1H2BA,HIST1H2BJ | HIST1H2BA | ENST00000274764        | p.T117A,p.TKAVTKYTS117in_frame_del                                      |
| 2          | HIST1H2AE,HIST1H2BA,HIST1H2BJ | HIST1H2BJ | ENST00000541790        | p.K121E                                                                 |
| 278        | CBFB,RUNX1                    | CBFB      | ENST00000412916        | p.R83L                                                                  |
| 278        | CBFB,RUNX1                    | RUNX1     | ENST00000300305        | p.D198G,p.D198N                                                         |
| 387        | H2AFY,SPOP                    | H2AFY     | ENST00000510038        | p.T175I                                                                 |
| 387        | H2AFY,SPOP                    | SPOP      | ENST00000393331        | p.Y87S,p.W131C,p.W131G,p.W131R                                          |
| 34         | LY96,TLR4                     | LY96      | ENST00000284818        | p.R90C,p.K125Q                                                          |
| 34         | LY96,TLR4                     | TLR4      | ENST00000355622        | p.S415I,p.F418L,p.L419F,p.E439A,p.E439K,p.F440L                         |

**Supplementary Table 16. Singletons In RBX1/CUL1/GLMN cluster**

| Cluster ID | Protein | Transcript (Ensembl74) | HGVS Protein Annotation | Closeness Centrality | Geodesic from Centroid | No. of Patient Samples |
|------------|---------|------------------------|-------------------------|----------------------|------------------------|------------------------|
| 73         | RBX1    | ENST00000216225        | p.A61V                  | 0.164865791          | 9.099                  | 1                      |
| 73         | CUL1    | ENST00000602748        | p.D510G                 | 0.013223596          | 7.416                  | 1                      |
| 73         | CUL1    | ENST00000602748        | p.E499D                 | 0.032101341          | 14.335                 | 1                      |
| 73         | GLMN    | ENST00000370360        | p.P376S                 | 0.020723168          | 11.43                  | 1                      |
| 73         | CUL1    | ENST00000602748        | p.R577Q                 | 0.020063756          | 6.936                  | 1                      |
| 73         | RBX1    | ENST00000216225        | p.T90I                  | 0.182281806          | 18.769                 | 1                      |

**Supplementary Table 17. Quantitative image analysis of intensities from western blots**

|         | pEGFR #1<br>(5.5intensity) | Relative<br>Intensity | EGFR #1<br>(8.5intensity) | Relative<br>Intensity | pEGFR/EGFR  |       |
|---------|----------------------------|-----------------------|---------------------------|-----------------------|-------------|-------|
| EGF +/- |                            |                       |                           |                       |             |       |
| WT-     | 1                          | 1058.82               | 1                         | 3500.841              | 0.302447326 | WT    |
| WT+     | 2                          | 4376.134              | 2                         | 2761.598              | 1.584638314 |       |
| L858R-  | 3                          | 2343.77               | 3                         | 2214.477              | 1.058385343 | L858R |
| L858R+  | 4                          | 4035.184              | 4                         | 1960.355              | 2.058394525 |       |
| L833F-  | 5                          | 1510.648              | 5                         | 1901.77               | 0.794337906 | L833F |
| L833F+  | 6                          | 3349.77               | 6                         | 2069.719              | 1.618466082 |       |
| R831H-  | 7                          | 4252.891              | 7                         | 7027.669              | 0.605163817 | R831H |
| R831H+  | 8                          | 5985.861              | 8                         | 4457.79               | 1.342786672 |       |
|         | pEGFR #2<br>(5.5intensity) |                       | EGFR #2<br>(8.5intensity) |                       |             |       |
| T790M-  | 1                          | 5803.82               | 1                         | 5233.134              | 1.109052434 | T790M |
| T790M+  | 2                          | 4943.305              | 2                         | 1131.577              | 4.368509611 |       |
| I789M-  | 3                          | 1685.062              | 3                         | 3468.113              | 0.485872865 | I789M |
| I789M+  | 4                          | 5697.912              | 4                         | 4644.355              | 1.226846785 |       |
| D761N-  | 5                          | 1808.184              | 5                         | 1792.698              | 1.008638376 | D761N |
| D761N+  | 6                          | 5005.598              | 6                         | 2756.477              | 1.81594042  |       |
| G719A-  | 7                          | 2707.548              | 7                         | 2798.255              | 0.967584441 | G719A |
| G719A+  | 8                          | 2476.012              | 8                         | 721.163               | 3.433359726 |       |



|       |   |   |                                                                  |                 |                                         |                                                                                                                  |
|-------|---|---|------------------------------------------------------------------|-----------------|-----------------------------------------|------------------------------------------------------------------------------------------------------------------|
| 0.483 | 2 | 2 | CTS1, acetic                                                     | ENST00000340342 | p.R318W,p.R319I                         | Cathepsins                                                                                                       |
| 0.487 | 2 | 2 | CLTC, acetic                                                     | ENST00000269122 | p.L622I,p.S249N                         | Unclassified                                                                                                     |
| 0.492 | 2 | 2 | CD30, n-acetyl-d-glucosamine                                     | ENST00000194871 | p.R92G,p.T42K                           | C1-set domain containing; CD molecules                                                                           |
| 0.494 | 3 | 3 | AZU1, ethanol                                                    | ENST00000233997 | p.P35S,p.S93F,p.G247R                   | Unclassified                                                                                                     |
| 0.494 | 3 | 3 | NR1L2, rifampin                                                  | ENST00000373940 | p.M362V,p.M222T                         | Nuclear hormone receptors                                                                                        |
| 0.493 | 3 | 3 | ICHE, domesepil, galantamine                                     | ENST00000115182 | p.I305V,p.H187A,p.G137R                 | Blood group antigens                                                                                             |
| 0.426 | 3 | 3 | DPEP1, cistatatin                                                | ENST00000246145 | p.A213T,p.V308A,p.H124Y                 | Unclassified                                                                                                     |
| 0.423 | 1 | 1 | PHK2, acetic                                                     | ENST00000106149 | p.I103M                                 | Protein Kinase; Protein phosphatase 1 regulatory subunits                                                        |
| 0.419 | 2 | 2 | CZAL, acetic                                                     | ENST00000112932 | p.H179M,p.R180K                         | Unclassified                                                                                                     |
| 0.416 | 2 | 2 | F2, acetic                                                       | ENST00000119007 | p.G499R,p.L492V                         | Endogenous ligands                                                                                               |
| 0.415 | 2 | 2 | CPIH4A1, bicucullatamide; clemastine                             | ENST00000201485 | p.A111V,p.R226S                         | Cytochrome P450s                                                                                                 |
| 0.408 | 2 | 2 | BR04, dimethyl                                                   | ENST00000301377 | p.R413W,p.S125G                         | Protein Kinase                                                                                                   |
| 0.401 | 2 | 2 | TR7, adenosine                                                   | ENST00000369798 | p.G514I,p.G046F                         | Protein Kinase                                                                                                   |
| 0.399 | 3 | 3 | MAPP11; nilotinib                                                | ENST00000153961 | p.R149W,p.V234M,p.H1167M                | Mitogen-activated protein kinases; Protein Kinase                                                                |
| 0.395 | 2 | 2 | MMF13; acetyhydroxamic                                           | ENST00000402073 | p.L222Q,p.P242R                         | Endogenous ligands; Matrix metalloproteinases                                                                    |
| 0.394 | 2 | 2 | DCX, acyclovir; cladribine; cidofovir; cytarabine; entricitabine | ENST00000504952 | p.A138E,p.L136V                         | Unclassified                                                                                                     |
| 0.393 | 2 | 2 | ETK, ibuprofen                                                   | ENST00000309731 | p.L529F,p.T554C,ENST00000372880,p.K60I  | Fibronectin hemolytic domain containing; Protein Kinase; SH2 domain containing                                   |
| 0.39  | 4 | 4 | FKHG2; sunitinib                                                 | ENST00000417775 | p.V50M,p.M260I                          | Protein Kinase                                                                                                   |
| 0.39  | 2 | 2 | CRV2, acetic                                                     | ENST00000328273 | p.R39L,p.E114K,p.E157K,p.A51T           | Unclassified                                                                                                     |
| 0.387 | 2 | 2 | ESG2, cotinadil                                                  | ENST00000410999 | p.R220Q,p.G472S                         | Nuclear hormone receptors                                                                                        |
| 0.382 | 2 | 2 | ACVZ8; adenine                                                   | ENST00000352511 | p.V358M,p.A266T                         | Protein Kinase; Type II receptor serine/threonine kinases                                                        |
| 0.373 | 3 | 3 | NEDD4, guanidine                                                 | ENST00000508342 | p.F973I,p.W846F,p.W885S                 | Unclassified                                                                                                     |
| 0.371 | 1 | 1 | GLR3; glutathione                                                | ENST00000378258 | p.S52R                                  | Unclassified                                                                                                     |
| 0.365 | 1 | 1 | TYM5; pemterexed; ralitrexed                                     | ENST00000323274 | p.F80L                                  | Unclassified                                                                                                     |
| 0.362 | 2 | 2 | PUS1; lysine                                                     | ENST00000376649 | p.A143T,p.R144Q                         | Unclassified                                                                                                     |
| 0.361 | 2 | 2 | FNTA, acetic                                                     | ENST00000302279 | p.W195C,p.Q203M                         | Fibronectin alpha subunit repeat containing                                                                      |
| 0.36  | 2 | 2 | CYP2R1; cholecalciferol; ergocalciferol                          | ENST00000346346 | p.M118L,p.A17T                          | Cytochrome P450s                                                                                                 |
| 0.346 | 2 | 2 | PC, pyruvic                                                      | ENST00000393960 | p.R644W,p.S576A                         | Unclassified                                                                                                     |
| 0.334 | 1 | 1 | VWS, acetic                                                      | ENST00000321405 | p.R192W                                 | Endogenous ligands                                                                                               |
| 0.33  | 1 | 1 | ACTR8, adenosine                                                 | ENST00000335754 | p.S55L                                  | WDR6 complex subunits                                                                                            |
| 0.33  | 1 | 1 | MAPP3; adenine                                                   | ENST00000307102 | p.R96K                                  | Mitogen-activated protein kinase kinases; Protein Kinase                                                         |
| 0.328 | 3 | 3 | NUS2, acetic                                                     | ENST00000222665 | p.R204W                                 | Endogenous ligands                                                                                               |
| 0.322 | 3 | 3 | FKBP5; dimethyl                                                  | ENST00000364338 | p.A95V,p.P477,p.V278C                   | Tetratricopeptide repeat domain containing                                                                       |
| 0.32  | 3 | 3 | NAMPP; diazoxide                                                 | ENST00000292661 | p.L282V,p.L197E                         | Unclassified                                                                                                     |
| 0.32  | 2 | 2 | AME1, acetic                                                     | ENST00000225613 | p.D192V,p.H193L,p.S275Y                 | CD molecules                                                                                                     |
| 0.318 | 3 | 3 | PKC1; acetic                                                     | ENST00000194441 | p.G237E,p.D311M,p.F333L                 | Unclassified                                                                                                     |
| 0.317 | 2 | 2 | FCN1; n-acetyl-d-glucosamine                                     | ENST00000371806 | p.D282N,p.F274L                         | Fibronectin C domain containing                                                                                  |
| 0.308 | 1 | 1 | ACR20; adenosine                                                 | ENST00000325616 | p.R634K                                 | ATP-binding cassette, sub-family B (MDR/TFAR)                                                                    |
| 0.307 | 2 | 2 | PPPSK2; adenosine                                                | ENST00000414217 | p.G474E,p.G527K                         | Unclassified                                                                                                     |
| 0.307 | 2 | 2 | LAMP3; n-acetyl-d-glucosamine                                    | ENST00000265598 | p.S279F,p.Q280I                         | CD molecules                                                                                                     |
| 0.307 | 2 | 2 | AB; imatinib                                                     | ENST00000376775 | p.F616R,p.G757R                         | CD molecules; Protein Kinase; Receptor Tyrosine Kinases                                                          |
| 0.306 | 2 | 2 | AB; bicucullatamide                                              | ENST00000374690 | p.E889D,p.R787Q                         | Nuclear hormone receptors                                                                                        |
| 0.306 | 2 | 2 | SGIGT7; n-acetyl-d-glucosamine                                   | ENST00000176443 | p.L987Q,p.P895E                         | CD molecules; immunoglobulin-like domain containing; Sialic acid binding to lectin like; V-set domain containing |
| 0.305 | 2 | 2 | NTRY2; acetic                                                    | ENST00000130341 | p.R392C,p.A130T                         | Unclassified                                                                                                     |
| 0.304 | 2 | 2 | CA14; acetazolamide                                              | ENST00000369111 | p.E152Q,p.S215I                         | Carbolic anhydrazides                                                                                            |
| 0.3   | 2 | 2 | FKRFB; acetic                                                    | ENST00000340253 | p.A997F,p.R113V                         | Unclassified                                                                                                     |
| 0.298 | 1 | 1 | SNRP200; adenosine                                               | ENST00000121863 | p.G140R,p.H1437K,p.G1333R               | Unclassified                                                                                                     |
| 0.298 | 1 | 1 | PKMT; adenine; s-adenosylmethionine                              | ENST00000269582 | p.A181V                                 | Unclassified                                                                                                     |
| 0.294 | 1 | 1 | FOLU3; folic; pemterexed                                         | ENST00000229223 | p.F78V                                  | Unclassified                                                                                                     |
| 0.291 | 2 | 2 | FHML; adenosine                                                  | ENST00000371909 | p.L80P,p.K311M,frame_del                | Unclassified                                                                                                     |
| 0.292 | 2 | 2 | ALDH1A1; acetic                                                  | ENST00000444455 | p.L437V,p.R211M                         | Aldehyde dehydrogenases                                                                                          |
| 0.29  | 2 | 2 | TYT; acetic                                                      | ENST00000342829 | p.R456C                                 | Unclassified                                                                                                     |
| 0.29  | 1 | 1 | NTX2; adenosine                                                  | ENST00000335616 | p.S412V,p.R326H                         | RNAi-ago-based protein phosphatases                                                                              |
| 0.289 | 1 | 1 | CSNK2A1; dimethyl                                                | ENST00000349736 | p.V196C                                 | Protein Kinase                                                                                                   |
| 0.289 | 1 | 1 | NKXN1; nilutinib                                                 | ENST00000283429 | p.T248H                                 | Short chain dehydrogenase/reductase superfamily                                                                  |
| 0.285 | 1 | 1 | ACD1; acetic                                                     | ENST00000379923 | p.R713L                                 | Unclassified                                                                                                     |
| 0.281 | 2 | 2 | CPB2; glycine                                                    | ENST00000181383 | p.W218R,p.P366A                         | Unclassified                                                                                                     |
| 0.277 | 3 | 3 | GABRR1; baclofen                                                 | ENST00000404977 | p.S351M,p.R552E,ENST00000377034,p.Q623K | GABA aminohydroxylic acid (GABA) B receptors                                                                     |
| 0.276 | 2 | 2 | PNAGE2; adenosine                                                | ENST00000304625 | p.V155F,p.W37R                          | Schizontoxins; Phase A                                                                                           |
| 0.276 | 1 | 1 | GALNT10; n-acetyl-d-glucosamine                                  | ENST00000297107 | p.R86C                                  | Polypeptide N-acetylglucosaminyltransferases                                                                     |
| 0.275 | 2 | 2 | FBRN1; acetic                                                    | ENST00000296802 | p.S348L,p.H345P                         | Protein Kinase                                                                                                   |
| 0.272 | 3 | 3 | HRK2; pexadinib                                                  | ENST00000220751 | p.A373R,p.R37A,p.N151K                  | Protein Kinase                                                                                                   |
| 0.272 | 2 | 2 | CDK2; adenosine                                                  | ENST00000553376 | p.K347,p.G130                           | Cyclin dependent kinases; Protein Kinase                                                                         |
| 0.272 | 2 | 2 | SETD3; s-adenosylmethionine                                      | ENST00000331768 | p.S249F,p.H170V                         | Unclassified                                                                                                     |
| 0.27  | 1 | 1 | HLHL2; acetic                                                    | ENST00000485533 | p.R350C                                 | Unclassified                                                                                                     |
| 0.27  | 1 | 1 | DOT1L; s-adenosylmethionine                                      | ENST00000398665 | p.G137R                                 | TYB (POZ) domain containing; Kelch-like                                                                          |
| 0.269 | 2 | 2 | ACSL1; pantamidine                                               | ENST00000338133 | p.T863K,p.D180N,p.H197A,p.V374D         | Lysine (K) specific methyltransferases                                                                           |
| 0.268 | 2 | 2 | MAPP3K7; adenosine                                               | ENST00000369329 | p.G45V,p.V90A                           | Unclassified                                                                                                     |
| 0.267 | 1 | 1 | ACSM2A; buggerfen                                                | ENST00000375690 | p.R472Q                                 | Mitogen-activated protein kinase kinases; Protein Kinase                                                         |
| 0.266 | 1 | 1 | RET; adenosine                                                   | ENST00000355710 | p.A793R,p.S891L                         | Acyl CoA synthetase family                                                                                       |
| 0.263 | 1 | 1 | NPC1; n-acetyl-d-glucosamine                                     | ENST00000269228 | p.A267T                                 | Calnexin-related; Protein Kinase; Receptor Tyrosine Kinases                                                      |
| 0.261 | 2 | 2 | AGO2; 1-tryptophan                                               | ENST00000220592 | p.P590L,p.T657M                         | Unclassified                                                                                                     |
| 0.26  | 2 | 2 | CPAA; n-acetyl-d-glucosamine                                     | ENST00000222482 | p.A282F,p.Q173N                         | Unclassified                                                                                                     |
| 0.258 | 5 | 4 | NFASC; n-acetyl-d-glucosamine                                    | ENST00000361772 | p.R492C,p.R515C,p.G238L,p.E154K         | Fibronectin type III domain containing; I-set domain containing                                                  |
| 0.253 | 2 | 2 | HNMT; amodiaquine                                                | ENST00000280097 | p.V147C,p.L285V                         | Unclassified                                                                                                     |
| 0.252 | 2 | 2 | PTPNS; acetic                                                    | ENST00000371621 | p.L215F,p.H258R                         | Protein Kinase; Receptor Tyrosine Kinases                                                                        |
| 0.251 | 2 | 2 | EGFR; afatinib                                                   | ENST00000275493 | p.L807H,p.S811C                         | Protein Kinase                                                                                                   |
| 0.248 | 3 | 3 | FLA267; acetic                                                   | ENST00000373665 | p.L265G,p.D262V,p.R264M                 | Phospholipases                                                                                                   |
| 0.246 | 1 | 1 | SNRP200; sulfanilamide                                           | ENST00000238853 | p.H1230N                                | Unclassified                                                                                                     |
| 0.245 | 2 | 2 | CHAT; choline                                                    | ENST00000337653 | p.L446N,p.S656Y                         | Unclassified                                                                                                     |
| 0.244 | 1 | 1 | GGG2; dimethyl                                                   | ENST00000325418 | p.L669R                                 | Protein Kinase                                                                                                   |
| 0.243 | 1 | 1 | ABCC1; adenosine                                                 | ENST00000309408 | p.G683E                                 | ATP-binding cassette, sub-family C (CFTR/MRP)                                                                    |
| 0.233 | 2 | 2 | ALB; phenylbutazone                                              | ENST00000295897 | p.S313F,p.D282E                         | Unclassified                                                                                                     |
| 0.232 | 2 | 2 | FCN2; n-acetyl-d-glucosamine                                     | ENST00000291744 | p.D194F,p.R192L                         | Fibronectin C domain containing                                                                                  |
| 0.229 | 1 | 1 | HADG3; venicostat                                                | ENST00000439122 | p.R141V                                 | X-linked mental retardation                                                                                      |
| 0.225 | 1 | 1 | TR7; dimethyl                                                    | ENST00000237014 | p.R41R                                  | Unclassified                                                                                                     |
| 0.224 | 3 | 3 | NUZ2; zaranolin                                                  | ENST00000233840 | p.F87L,p.E355K,p.R41W                   | Unclassified                                                                                                     |
| 0.221 | 2 | 2 | NADH1; reaginine; nicosamide                                     | ENST00000378669 | p.F368L,p.S200G                         | Unclassified                                                                                                     |
| 0.22  | 3 | 3 | PGK1; adenosine                                                  | ENST00000306108 | p.V277L                                 | Unclassified                                                                                                     |
| 0.22  | 1 | 1 | YMTF1B; s-adenosylmethionine                                     | ENST00000439947 | p.V277R                                 | Unclassified                                                                                                     |
| 0.213 | 2 | 2 | ACRY10; acetic                                                   | ENST00000367615 | p.V127M,p.A95V                          | Adenylyl cyclases                                                                                                |
| 0.209 | 1 | 1 | CCBL1; l-phenylalanine                                           | ENST00000432627 | p.W112R                                 | Unclassified                                                                                                     |
| 0.209 | 1 | 1 | ACPP; n-acetyl-d-glucosamine                                     | ENST00000315273 | p.R91N                                  | Unclassified                                                                                                     |
| 0.208 | 4 | 4 | SRR9046; hydrocortisone                                          | ENST00000367651 | p.G27R                                  | Serine (or cysteine) peptidase inhibitors                                                                        |
| 0.208 | 1 | 1 | ADCY10; dimethyl                                                 | ENST00000341584 | p.S394R,p.R282A,p.T284M,p.A290T         | Adenylyl cyclases                                                                                                |
| 0.207 | 1 | 1 | UG4; adenosine                                                   | ENST00000400525 | p.L427D                                 | Unclassified                                                                                                     |
| 0.205 | 1 | 1 | FHR5; acetic                                                     | ENST00000338488 | p.R247Q                                 | Lysine (K) specific demethylases; PHD finger proteins                                                            |
| 0.204 | 1 | 1 | ASH1; s-adenosylmethionine                                       | ENST00000368346 | p.G17N,p.L2277R                         | Lysine (K) specific methyltransferases; PHD finger proteins                                                      |
| 0.204 | 1 | 1 | PKR; riboflavin                                                  | ENST00000367636 | p.D122V                                 | Unclassified                                                                                                     |
| 0.203 | 2 | 2 | MAZ; adenosine                                                   | ENST00000339011 | p.F555C,p.I579P                         | SH2 domain containing                                                                                            |
| 0.203 | 1 | 1 | THRA; levothyrosine                                              | ENST00000264637 | p.E339Q                                 | Nuclear hormone receptors                                                                                        |
| 0.402 | 1 | 1 | GLC2L1; acetic                                                   | ENST00000392256 | p.R153P                                 | Mitogen-activated protein kinase kinases; Protein Kinase                                                         |
| 0.2   | 2 | 2 | GLA; rash                                                        | ENST00000374497 | p.R184C,p.G1139A,p.F93L                 | Short chain dehydrogenase/reductase superfamily                                                                  |
| 0.2   | 2 | 2 | PKLX; adenosine                                                  | ENST00000241436 | p.N130D,p.D109N                         | Polymerases, DNA-directed                                                                                        |
| 0.196 | 1 | 1 | PTPNS; acetic                                                    | ENST00000274889 | p.G603R                                 | Fibronectin type III domain containing; Protein tyrosine phosphatases, receptor type                             |
| 0.195 | 2 | 2 | CP2A; nicotine                                                   | ENST00000301141 | p.L442Q,p.V300I                         | Cytochrome P450s                                                                                                 |
| 0.194 | 1 | 1 | LDH8; rash                                                       | ENST00000396076 | p.A252T                                 | Unclassified                                                                                                     |
| 0.194 | 1 | 1 | ULC; acetic                                                      | ENST00000346769 | p.H676R                                 | Unclassified                                                                                                     |
| 0.193 | 1 | 1 | OTYW4; adenosine                                                 | ENST00000307984 | p.R143L                                 | Unclassified                                                                                                     |
| 0.19  | 1 | 1 | HDC1; acetic                                                     | ENST00000373548 | p.H177R                                 | Unclassified                                                                                                     |
| 0.189 | 2 | 2 | CPCL1; n-acetyl-d-glucosamine                                    | ENST00000420138 | p.A157V,p.A180R                         | Glypicans                                                                                                        |
| 0.189 | 2 | 2 | CPCL1; glutathione                                               | ENST00000395892 | p.L76V,p.G63R                           | Chloride intracellular channels                                                                                  |
| 0.185 | 2 | 2 | ILBP3; glutathione                                               | ENST00000293379 | p.P56L                                  | Unclassified                                                                                                     |
| 0.185 | 1 | 1 | FHGA; n-acetyl-d-glucosamine                                     | ENST00000367499 | p.H262C,p.D197G                         | CD molecules; integrins                                                                                          |
| 0.18  | 1 | 1 | SMYD2; s-adenosylmethionine                                      | ENST00000466657 | p.L206F                                 | Lysine (K) specific methyltransferases; Zinc fingers, MNF-type                                                   |
| 0.18  | 1 | 1 | TCN1; cyanocobalamin                                             | ENST00000257264 | p.E94Q                                  | Unclassified                                                                                                     |
| 0.176 | 1 | 1 | JKK2; acetic                                                     | ENST00000339801 | p.W738C                                 | SH2 domain containing                                                                                            |

|       |   |   |                                     |                 |                         |                                                                                                                         |
|-------|---|---|-------------------------------------|-----------------|-------------------------|-------------------------------------------------------------------------------------------------------------------------|
| 0.175 | 1 | 1 | CTS1, n-acetyl-d-glucosamine        | ENSTD0000372484 | p.E166Q                 | Cathepsins                                                                                                              |
| 0.172 | 2 | 2 | SDTB, s-adenosylmethionine          | ENSTD0000394079 | p.E289Q,p.H947Q         | Lysine (K) specific methyltransferases                                                                                  |
| 0.171 | 3 | 3 | TRF6, adenosine                     | ENSTD0000311740 | p.V121E,p.T231L,p.P160Q | Arkyrin repeat domain containing; Transient receptor potential cation channels                                          |
| 0.169 | 1 | 1 | LDHA, nadh                          | ENSTD0000504030 | p.I281T                 | Unclassified                                                                                                            |
| 0.166 | 2 | 2 | SULT1A1, estradiol                  | ENSTD0000509554 | p.V243L,p.T135          | Sulfotransferases, cytosolic                                                                                            |
| 0.164 | 2 | 2 | TRPK1, adenosine                    | ENSTD0000424085 | p.Q387R,p.L388F         | Protein Kinase                                                                                                          |
| 0.161 | 2 | 2 | GSS, glutathione                    | ENSTD0000420653 | p.A149E                 | Unclassified                                                                                                            |
| 0.161 | 1 | 1 | MCL1, acetic                        | ENSTD0000216951 | p.A46L,p.DD19H          | Protein phosphatase 1 regulatory subunits                                                                               |
| 0.154 | 1 | 1 | MLH1, adenosine                     | ENSTD0000231790 | p.Q65W                  | Unclassified                                                                                                            |
| 0.153 | 1 | 1 | RBP2, vitamin                       | ENSTD0000232217 | p.I287                  | Fatty acid binding protein family                                                                                       |
| 0.152 | 1 | 1 | GMBR2, n-acetyl-d-glucosamine       | ENSTD0000293685 | p.D631N                 | Gamma-aminobutyric acid (GABA) B receptors                                                                              |
| 0.151 | 1 | 1 | MULT1, acetic                       | ENSTD0000515680 | p.M388T                 | Unclassified                                                                                                            |
| 0.147 | 2 | 2 | UPL1, fluorouracil                  | ENSTD0000241052 | p.R127Q                 | Unclassified                                                                                                            |
| 0.146 | 2 | 2 | CAT, acetic                         | ENSTD0000313883 | p.G144R,p.R273C         | Unclassified                                                                                                            |
| 0.146 | 2 | 2 | SRK1, adenosine                     | ENSTD0000381962 | p.A101T,p.F777          | Unclassified                                                                                                            |
| 0.144 | 3 | 3 | MGM1, mightail                      | ENSTD0000549489 | p.R384H,p.V534F,p.G627E | Unclassified                                                                                                            |
| 0.143 | 2 | 2 | EPWC2, tubestomat                   | ENSTD0000507071 | p.I378T                 | Unclassified                                                                                                            |
| 0.143 | 1 | 1 | SI008, acetic                       | ENSTD0000521400 | p.V498M,p.L417S         | H4F-hand domain containing; S100 calcium binding proteins                                                               |
| 0.141 | 1 | 1 | TDPI, sperminal                     | ENSTD0000393454 | p.M90A                  | Unclassified                                                                                                            |
| 0.139 | 1 | 1 | CK1A, dimethyl                      | ENSTD0000399566 | p.S229F                 | Unclassified                                                                                                            |
| 0.137 | 1 | 1 | SQCF, acetic                        | ENSTD0000523483 | p.V158F                 | Unclassified                                                                                                            |
| 0.133 | 1 | 1 | NAGA, n-acetyl-d-glucosamine        | ENSTD0000396398 | p.F199L                 | Unclassified                                                                                                            |
| 0.132 | 1 | 1 | BRD2, dimethyl                      | ENSTD0000607833 | p.V435I                 | Protein Kinase                                                                                                          |
| 0.131 | 1 | 1 | GGC1, acetic                        | ENSTD0000275428 | p.G23C                  | Unclassified                                                                                                            |
| 0.129 | 1 | 1 | METAP1, acetic                      | ENSTD0000296411 | p.H301V                 | Unclassified                                                                                                            |
| 0.127 | 3 | 3 | GARS, adenosine                     | ENSTD000019810  | p.V579K,p.G307L,p.R513C | Aminoacyl tRNA synthetases, Class II                                                                                    |
| 0.125 | 3 | 3 | CAMK2A, bosutinib                   | ENSTD0000398376 | p.I17K,p.S25L,p.D90N    | Protein Kinase                                                                                                          |
| 0.124 | 1 | 1 | SRPPNG1, n-acetyl-d-glucosamine     | ENSTD0000403558 | p.R277W                 | Serine (or cysteine) peptidase inhibitors                                                                               |
| 0.123 | 1 | 1 | SDPN, n-acetyl-d-glucosamine        | ENSTD0000205948 | p.S161I                 | Aspogonins                                                                                                              |
| 0.117 | 1 | 1 | BMX, dasatinib                      | ENSTD0000357607 | p.G424E                 | Pleckstrin homology domain containing; Protein Kinase; SH2 domain containing                                            |
| 0.113 | 1 | 1 | FTF1, adenosine                     | ENSTD0000460541 | p.P119L                 | Unclassified                                                                                                            |
| 0.113 | 1 | 1 | MTR7A, acetic                       | ENSTD0000491774 | p.S116D                 | CD molecule; Protein Kinase; Receptor Tyrosine Kinases                                                                  |
| 0.113 | 1 | 1 | LGALS3BP, n-acetyl-d-glucosamine    | ENSTD0000267776 | p.R63W                  | BTB (POZ) domain containing; Endogenous ligands                                                                         |
| 0.107 | 2 | 2 | EP30, dimethyl                      | ENSTD0000225174 | p.R193K                 | Kylisnel acetyltransferases                                                                                             |
| 0.107 | 1 | 1 | EPF, dimethyl                       | ENSTD0000533576 | p.Q133H                 | Unclassified                                                                                                            |
| 0.106 | 2 | 2 | ERBB3, bosutinib                    | ENSTD0000287101 | p.G1221D,p.L1792V       | Cyclin-dependent kinases; Protein Kinase                                                                                |
| 0.106 | 1 | 1 | ERK1, levothyronine                 | ENSTD0000396066 | p.G347E                 | Protein Kinase; Receptor Tyrosine Kinases                                                                               |
| 0.105 | 2 | 2 | NR3C2, progesterone; spironolactone | ENSTD0000359015 | p.P901L                 | Nuclear hormone receptors                                                                                               |
| 0.105 | 1 | 1 | MARCKS, acetic                      | ENSTD000015528  | p.Y832C,p.C205F         | Nucleoside diphosphate kinase                                                                                           |
| 0.105 | 1 | 1 | CA, ticlopidine                     | ENSTD0000309600 | p.R213I                 | Nuclear hormone receptors                                                                                               |
| 0.105 | 1 | 1 | CA13, acetazolamide                 | ENSTD0000321764 | p.S131N                 | Nuclear hormone receptors                                                                                               |
| 0.105 | 1 | 1 | ZADH, fenpropfen                    | ENSTD0000232342 | p.S282L                 | Mitogen-activated protein kinase kinase kinases; Protein Kinase                                                         |
| 0.104 | 1 | 1 | FRCD2, n-acetyl-d-glucosamine       | ENSTD0000333189 | p.Q118F                 | Carbonic anhydrases                                                                                                     |
| 0.103 | 1 | 1 | APCS, acetic                        | ENSTD0000255040 | p.H97Q                  | Unclassified                                                                                                            |
| 0.097 | 1 | 1 | CANT1, acetic                       | ENSTD0000302345 | p.S303T                 | Unclassified                                                                                                            |
| 0.096 | 2 | 2 | MAD6, acetic                        | ENSTD0000445478 | p.E183R,p.E187R         | Unclassified                                                                                                            |
| 0.09  | 2 | 2 | LTA4H, acetic                       | ENSTD0000228740 | p.L364R,p.S486A         | Unclassified                                                                                                            |
| 0.089 | 3 | 3 | FAP, n-acetyl-d-glucosamine         | ENSTD0000188790 | p.V47R,p.S57R,p.A55N    | Unclassified                                                                                                            |
| 0.088 | 3 | 3 | TSG18, velturostat                  | ENSTD0000231341 | p.S441G                 | Phosphodiesterases                                                                                                      |
| 0.088 | 2 | 2 | MI2, nadh                           | ENSTD0000333229 | p.I420S                 | Unclassified                                                                                                            |
| 0.088 | 1 | 1 | BRW1, acetic                        | ENSTD0000344828 | p.J712V                 | WD repeat domain containing                                                                                             |
| 0.088 | 1 | 1 | MAL3, imordasone                    | ENSTD0000451517 | p.R381R,p.Y652E,p.K445Q | Immunoglobulin-like domain containing                                                                                   |
| 0.086 | 2 | 2 | IL12B, n-acetyl-d-glucosamine       | ENSTD0000231228 | p.E25D,p.L26F           | Immunoglobulin-like domain containing; Interleukins                                                                     |
| 0.086 | 1 | 1 | GLRX, glutathione                   | ENSTD0000397440 | p.T78C                  | Unclassified                                                                                                            |
| 0.084 | 1 | 1 | PKTX, acetic                        | ENSTD0000398620 | p.N102D                 | Unclassified                                                                                                            |
| 0.082 | 1 | 1 | ERAP2, n-acetyl-d-glucosamine       | ENSTD0000437043 | p.R225Q                 | Aminoacyltransferases                                                                                                   |
| 0.081 | 2 | 2 | FRD8, rabofene                      | ENSTD0000309195 | p.D687R,p.A241V         | Unclassified                                                                                                            |
| 0.081 | 1 | 1 | GLG4, acetic                        | ENSTD0000399510 | p.G388D                 | Unclassified                                                                                                            |
| 0.08  | 2 | 2 | GSTP1, glutathione                  | ENSTD0000398606 | p.L63M,p.T88S           | Glutathione S-transferases                                                                                              |
| 0.079 | 2 | 2 | Smyd3, s-adenosylmethionine         | ENSTD0000388885 | p.S207P,p.S182F         | Lysine (K) specific methyltransferases; Zinc fingers; MYND-type                                                         |
| 0.078 | 1 | 1 | PREP, acetic                        | ENSTD0000399110 | p.R643C                 | Unclassified                                                                                                            |
| 0.076 | 2 | 2 | ANK1, ethanol                       | ENSTD0000300093 | p.V98A                  | Arkyrin repeat domain containing                                                                                        |
| 0.076 | 1 | 1 | FKL1, acetic                        | ENSTD0000396842 | p.S97V,p.G93D           | Protein Kinase                                                                                                          |
| 0.075 | 1 | 1 | FTZD, adenosine                     | ENSTD0000519419 | p.G607Y                 | Protein Kinase; Protein phosphatase 1 regulatory subunits                                                               |
| 0.075 | 1 | 1 | WAPAL, acetic                       | ENSTD0000298767 | p.R731C                 | Unclassified                                                                                                            |
| 0.075 | 1 | 1 | MTAP, adenosine                     | ENSTD0000508900 | p.V177G,p.S178N         | Unclassified                                                                                                            |
| 0.071 | 1 | 1 | HCN4, acetic                        | ENSTD0000261917 | p.E695K                 | Cyclic nucleotide-gated channels                                                                                        |
| 0.07  | 1 | 1 | PPP3K2, acetic                      | ENSTD0000414217 | p.R677M                 | Unclassified                                                                                                            |
| 0.067 | 1 | 1 | EPH4, succinic                      | ENSTD0000263655 | p.R617I                 | Protein Disulfide Isomerase                                                                                             |
| 0.065 | 1 | 1 | BMF7, n-acetyl-d-glucosamine        | ENSTD0000395863 | p.G429Q                 | Bone morphogenetic protein; Endogenous ligands                                                                          |
| 0.064 | 1 | 1 | FRCD1, n-acetyl-d-glucosamine       | ENSTD0000448616 | p.E139K                 | Fibrinogen C domain containing                                                                                          |
| 0.063 | 1 | 1 | PMR2, glycine                       | ENSTD0000262861 | p.H819Y,p.frame_del     | H4F-hand domain containing; Protein phosphatase 1 regulatory subunits                                                   |
| 0.062 | 1 | 1 | EFNB2, n-acetyl-d-glucosamine       | ENSTD0000245123 | p.S40A                  | Ephrins                                                                                                                 |
| 0.059 | 1 | 1 | HAT1, acetic                        | ENSTD0000264108 | p.E205Q                 | Kylisnel acetyltransferases                                                                                             |
| 0.059 | 1 | 1 | HOM4, guanidine                     | ENSTD0000397382 | p.S98T                  | Unclassified                                                                                                            |
| 0.058 | 2 | 2 | TLR4, n-acetyl-d-glucosamine        | ENSTD0000355622 | p.T151Y,p.E169A         | CD molecule; Helicins                                                                                                   |
| 0.058 | 1 | 1 | STS, n-acetyl-d-glucosamine         | ENSTD0000217961 | p.G599R                 | Sulfatases                                                                                                              |
| 0.056 | 2 | 2 | PLN1C1, n-acetyl-d-glucosamine      | ENSTD0000256526 | p.S523G,p.S278L         | CD molecule; Helicins                                                                                                   |
| 0.056 | 1 | 1 | CALM3, trifluoperazine              | ENSTD0000291295 | p.M145I                 | EF-hand domain containing; Endogenous ligands                                                                           |
| 0.055 | 2 | 2 | CYP2A6, methococain                 | ENSTD0000301141 | p.T293M,p.V188M         | Cytochrome P450s                                                                                                        |
| 0.053 | 1 | 1 | SBRK, n-acetyl-d-glucosamine        | ENSTD0000400568 | p.N115D                 | C2-set domain containing; CD molecule; Signal-regulatory proteins; V-set domain containing                              |
| 0.053 | 1 | 1 | TEK, n-acetyl-d-glucosamine         | ENSTD0000380036 | p.V139M                 | Pleckstrin homology domain containing; Immunoglobulin-like domain containing; Protein Kinase; Receptor Tyrosine Kinases |
| 0.051 | 1 | 1 | BTX, dimethyl                       | ENSTD0000308711 | p.R544M                 | Unclassified                                                                                                            |
| 0.05  | 1 | 1 | SRTB, s-adenosylmethionine          | ENSTD0000193515 | p.M294T                 | Pleckstrin homology domain containing; Protein Kinase; SH2 domain containing                                            |
| 0.048 | 3 | 3 | CYP2B6, amiodopine                  | ENSTD0000214071 | p.T303L,p.F42L,p.M56I   | Cytochrome P450s                                                                                                        |
| 0.047 | 1 | 1 | CTS1, n-acetyl-d-glucosamine        | ENSTD0000340342 | p.G195D                 | Cathepsins                                                                                                              |
| 0.047 | 1 | 1 | RNF28, n-acetyl-d-glucosamine       | ENSTD0000515499 | p.Q401G                 | Ring finger proteins                                                                                                    |
| 0.047 | 1 | 1 | SRF2, acetic                        | ENSTD0000249396 | p.F231L                 | Unclassified                                                                                                            |
| 0.047 | 1 | 1 | CDN3, acetic                        | ENSTD0000265734 | p.R168G                 | Cyclin-dependent kinases; Protein Kinase                                                                                |
| 0.046 | 1 | 1 | AMPK, acetyldroscaramic             | ENSTD0000216826 | p.P172S                 | Matrix metalloproteinases                                                                                               |
| 0.046 | 1 | 1 | PDXK, adenosine                     | ENSTD0000291565 | p.V229R                 | Unclassified                                                                                                            |
| 0.045 | 2 | 2 | MEP1B, n-acetyl-d-glucosamine       | ENSTD0000269202 | p.P72L,p.R70G           | Ataxins                                                                                                                 |
| 0.045 | 1 | 1 | TABL1, n-acetyl-d-glucosamine       | ENSTD0000161610 | p.F951Q                 | Unclassified                                                                                                            |
| 0.044 | 1 | 1 | ASS1, l-citrulline                  | ENSTD0000372394 | p.S278T                 | Unclassified                                                                                                            |
| 0.043 | 1 | 1 | DHFR, folic                         | ENSTD0000505537 | p.L139I                 | Unclassified                                                                                                            |
| 0.043 | 1 | 1 | CDAT1, carntoine                    | ENSTD0000180800 | p.F624E                 | Unclassified                                                                                                            |
| 0.041 | 2 | 2 | CA12, acetazolamide                 | ENSTD0000237014 | p.G131E                 | Carbonic anhydrases                                                                                                     |
| 0.041 | 1 | 1 | TR, furiprotein                     | ENSTD0000178658 | p.F576M,p.M150T         | Unclassified                                                                                                            |
| 0.039 | 1 | 1 | MTR1, dimethyl                      | ENSTD0000293529 | p.T124R                 | Unclassified                                                                                                            |
| 0.039 | 1 | 1 | MAPP2K2, adenosine                  | ENSTD0000262948 | p.G83S                  | Mitogen-activated protein kinase kinases; Protein Kinase                                                                |
| 0.039 | 1 | 1 | ITGA8B, n-acetyl-d-glucosamine      | ENSTD0000262407 | p.P45H                  | CD molecule; Integrins; Protein phosphatase 1 regulatory subunits                                                       |
| 0.038 | 1 | 1 | ESR6, pyrrolmethione                | ENSTD0000261416 | p.R670Q                 | Unclassified                                                                                                            |
| 0.038 | 1 | 1 | TSR8, n-acetyl-d-glucosamine        | ENSTD0000298171 | p.T54M                  | Glycoprotein hormone receptors                                                                                          |
| 0.038 | 1 | 1 | TRIC120, acetic                     | ENSTD0000461304 | p.L278M                 | Unclassified                                                                                                            |
| 0.037 | 1 | 1 | ERD2, acetaminophen                 | ENSTD0000078113 | p.D160N                 | Protein Kinase                                                                                                          |
| 0.037 | 1 | 1 | PDE10A, pappaverine                 | ENSTD0000398649 | p.P750S                 | Phosphodiesterases                                                                                                      |
| 0.035 | 1 | 1 | TRIP14, n-acetyl-d-glucosamine      | ENSTD0000509959 | p.S103C                 | CD molecule; Tumor necrosis factor (ligand) superfamily                                                                 |
| 0.034 | 1 | 1 | GRIN4, n-acetyl-d-glucosamine       | ENSTD0000315225 | p.L197D                 | CD molecule                                                                                                             |
| 0.034 | 1 | 1 | GAK, succinic                       | ENSTD0000314167 | p.C190F                 | CD molecule                                                                                                             |
| 0.033 | 1 | 1 | ADAM22, n-acetyl-d-glucosamine      | ENSTD0000260577 | p.S353L                 | C2-zeatin type domain containing; DNAX (HSP40) heat shock proteins; Protein Kinase                                      |
| 0.033 | 1 | 1 | AGL1, n-acetyl-d-glucosamine        | ENSTD0000254958 | p.V192C                 | ADAM metalloproteinase domain containing                                                                                |
| 0.031 | 1 | 1 | NUDT2, adenosine                    | ENSTD0000379158 | p.A27                   | CD molecule                                                                                                             |
| 0.032 | 1 | 1 | FDFT2, n-acetyl-d-glucosamine       | ENSTD0000394845 | p.V290I                 | Nudix type motif-containing                                                                                             |
| 0.031 | 1 | 1 | H4CR, nadh                          | ENSTD0000403312 | p.S157G                 | Fucosyltransferases                                                                                                     |
| 0.031 | 1 | 1 | MAPP14, dimethyl                    | ENSTD0000229795 | p.RVAVKKA9N,p.frame_del | Unclassified                                                                                                            |
| 0.03  | 1 | 1 | AKR1C2, acetic                      | ENSTD0000380753 | p.M161V                 | Mitogen-activated protein kinases; Protein Kinase                                                                       |
|       |   |   |                                     |                 |                         | Allo-iso reductases                                                                                                     |

|       |   |   |                                   |                 |                         |                                                                                                                                                   |
|-------|---|---|-----------------------------------|-----------------|-------------------------|---------------------------------------------------------------------------------------------------------------------------------------------------|
| 0.029 | 1 | 1 | CD55; acetic                      | ENST00000367063 | p.P2185                 | Blood group antigens; CD molecules                                                                                                                |
| 0.028 | 1 | 1 | TPSG2; n-acetyl-d-glucosamine     | ENST00000369750 | p.V78F                  | Unclassified                                                                                                                                      |
| 0.028 | 1 | 1 | ITGAM; n-acetyl-d-glucosamine     | ENST00000261023 | p.V48N                  | CD molecules; Integrins                                                                                                                           |
| 0.027 | 1 | 1 | PYGM; adenine                     | ENST00000164139 | p.R570W                 | Phosphorylases, glycogen                                                                                                                          |
| 0.026 | 3 | 3 | LZOR1; n-acetyl-d-glucosamine     | ENST00000316649 | p.V183M,p.H2177,p.R192K | Interleukin receptors                                                                                                                             |
| 0.025 | 1 | 1 | CSF3; sulfasalazine               | ENST00000398606 | p.N202D                 | Glutathione S-transferases                                                                                                                        |
| 0.025 | 1 | 1 | SLC1A2; acetic                    | ENST0000037892  | p.W481C                 | Solute carriers                                                                                                                                   |
| 0.024 | 1 | 1 | CTSO; dimethyl                    | ENST00000368865 | p.D211E                 | Cathepsins                                                                                                                                        |
| 0.024 | 1 | 1 | ZBTB17; acetic                    | ENST00000375733 | p.A96V                  | BTB (POZ) domain containing; Zinc fingers, C2H2 type                                                                                              |
| 0.024 | 1 | 1 | ARRDC3; guanidine                 | ENST00000265138 | p.Y349C                 | Unclassified                                                                                                                                      |
| 0.023 | 1 | 1 | ITNA1; n-acetyl-d-glucosamine     | ENST00000289361 | p.V118I                 | Butyrophilins; C2-set domain containing; CD molecules; V-set domain containing                                                                    |
| 0.022 | 1 | 1 | TOP2B; epiposide                  | ENST00000344311 | p.S823N                 | Unclassified                                                                                                                                      |
| 0.022 | 1 | 1 | PTK2; chloropyrimine              | ENST0000019419  | p.Q1063H                | Protein Kinase; Protein phosphatase 1 regulatory subunits                                                                                         |
| 0.022 | 1 | 1 | TNFRSF10B; n-acetyl-d-glucosamine | ENST00000376411 | p.R115H                 | CD molecules; Tumor necrosis factor receptor superfamily                                                                                          |
| 0.022 | 1 | 1 | ITPK; n-acetyl-d-glucosamine      | ENST00000246818 | p.S27A                  | Unclassified                                                                                                                                      |
| 0.022 | 1 | 1 | BRCA1; acetic                     | ENST00000471181 | p.V1686L                | Protein phosphatase 1 regulatory subunits; Ring finger proteins                                                                                   |
| 0.02  | 1 | 1 | ST1A; n-acetyl-d-glucosamine      | ENST00000278742 | p.P299R                 | Proteases, serine                                                                                                                                 |
| 0.02  | 1 | 1 | SPH4; sitagliptin                 | ENST00000360534 | p.Y585H                 | CD molecules                                                                                                                                      |
| 0.02  | 1 | 1 | KDM4D; acetic                     | ENST00000336741 | p.P260S                 | Lysine (K) specific demethylases                                                                                                                  |
| 0.02  | 1 | 1 | KLGN4V; n-acetyl-d-glucosamine    | ENST00000381093 | p.Q105E                 | Unclassified                                                                                                                                      |
| 0.019 | 1 | 1 | CTLA4; n-acetyl-d-glucosamine     | ENST00000302823 | p.G199R                 | CD molecules; V-set domain containing                                                                                                             |
| 0.018 | 1 | 1 | GALNS; n-acetyl-d-glucosamine     | ENST00000268695 | p.F194C                 | Sulfatases                                                                                                                                        |
| 0.018 | 1 | 1 | TPP2; n-acetyl-d-glucosamine      | ENST00000299427 | p.A555S                 | Unclassified                                                                                                                                      |
| 0.018 | 1 | 1 | CD47; n-acetyl-d-glucosamine      | ENST00000361309 | p.I127V                 | CD molecules; Immunoglobulin-like domain containing                                                                                               |
| 0.018 | 1 | 1 | NTSE; adenosine                   | ENST00000257770 | p.R441H                 | CD molecules                                                                                                                                      |
| 0.017 | 2 | 2 | CD1; n-acetyl-d-glucosamine       | ENST00000375820 | p.S164E                 | Complement system                                                                                                                                 |
| 0.017 | 1 | 1 | CDL4A1; acetic                    | ENST00000394635 | p.M540,p.E288X          | Collagens                                                                                                                                         |
| 0.016 | 1 | 1 | PKP4; dimethyl                    | ENST00000010008 | p.T391I                 | Tetrapeptide repeat domain containing                                                                                                             |
| 0.016 | 1 | 1 | AKR1C2; isidomethacin             | ENST00000380753 | p.R304Q                 | Aldo keto reductases                                                                                                                              |
| 0.016 | 1 | 1 | FECH; salicylic                   | ENST00000382873 | p.A288T                 | Unclassified                                                                                                                                      |
| 0.016 | 1 | 1 | GDNF; n-acetyl-d-glucosamine      | ENST00000427982 | p.V144I                 | Endogenous ligands                                                                                                                                |
| 0.015 | 1 | 1 | PTPRC3; acetic                    | ENST00000265562 | p.L428I                 | Protein tyrosine phosphatases, non-receptor type                                                                                                  |
| 0.014 | 1 | 1 | CSF2RB; n-acetyl-d-glucosamine    | ENST00000406230 | p.L177F                 | CD molecules; Fibronectin type III domain containing                                                                                              |
| 0.014 | 1 | 1 | CYP3A4; dimethyl                  | ENST00000336411 | p.K476E                 | Cytochrome P450s                                                                                                                                  |
| 0.014 | 1 | 1 | IL13L1; n-acetyl-d-glucosamine    | ENST00000339564 | p.Q479V                 | I-set domain containing; Immunoglobulin-like domain containing; Interleukin receptors                                                             |
| 0.013 | 1 | 1 | ITGA4; n-acetyl-d-glucosamine     | ENST00000397033 | p.F112Q                 | CD molecules; Integrins                                                                                                                           |
| 0.013 | 1 | 1 | CS3; acetic                       | ENST00000398168 | p.V119M                 | Unclassified                                                                                                                                      |
| 0.013 | 1 | 1 | GSTA3; glutathione                | ENST00000311122 | p.I05V                  | Glutathione S-transferases                                                                                                                        |
| 0.011 | 1 | 1 | IL6R; l-cysteine                  | ENST00000368485 | p.G299R                 | CD molecules; Immunoglobulin-like domain containing; Interleukin receptors                                                                        |
| 0.01  | 1 | 1 | LRRRC4C; n-acetyl-d-glucosamine   | ENST0000028697  | p.N331S                 | I-set domain containing                                                                                                                           |
| 0.009 | 1 | 1 | ITPK; n-acetyl-d-glucosamine      | ENST0000030566  | p.S103S                 | Unclassified                                                                                                                                      |
| 0.009 | 1 | 1 | TYRO3; acetic                     | ENST00000263798 | p.G210D                 | Fibronectin type III domain containing; I-set domain containing; Immunoglobulin-like domain containing; Protein Kinase; Receptor Tyrosine Kinases |
| 0.008 | 1 | 1 | LIPF; n-acetyl-d-glucosamine      | ENST00000394375 | p.E57K                  | Lipases                                                                                                                                           |
| 0.002 | 1 | 1 | URE2D1; acetic                    | ENST00000373910 | p.R303N                 | Ubiquitin-conjugating enzymes E2                                                                                                                  |



**DrugBank Classifications**

Antineoplastic Agents  
Unclassified  
Dietary Supplements; Micronutrients; Supplements  
Unclassified  
Unclassified  
Unclassified  
Unclassified  
Anti-menopausal Agents; Antihypocalemic Agents; Bone Density Conservation Agents; Carcinogens; Contraceptive Agents; Estrogen Antagonists; Estrogens; Estrogens, Non-Steroidal; Selective Estrogen Receptor Modulators; Unclassified  
Unclassified  
Analgesics; Anti-Arhythmia Agents; Cardiovascular Agents; Vasodilator Agents  
Unclassified  
Antihypocalcemic Agents; Antireceptors; Bisphosphonates; Bone Density Conservation Agents; Calcium Channel Blockers  
Dietary Supplements; Micronutrients; Supplements  
Dietary Supplements; Micronutrients; Supplements  
Unclassified  
Anticonvulsants; Carbonic Anhydrase Inhibitors; Diuretics; Sodium Potassium Chloride Symporter Inhibitors; Unclassified  
Dietary Supplements; Micronutrients; Supplements  
Dietary Supplements; Micronutrients; Supplements; Unclassified  
Anticholinergic Agents; Hydromethylglutaryl CoA Reductase Inhibitors  
Dietary Supplements; Micronutrients; Supplements  
Unclassified  
Dietary Supplements; Micronutrients; Supplements  
Analgesics; Anti-Anxiety Agents; Anticonvulsants; Antismanic Agents; Antiparkinson Agents; Calcium Channel Blockers; Excitatory Amino Acid Antagonists  
Dietary Supplements; Micronutrients; Supplements  
Antineoplastic Agents; Keratolytic Agents; Unclassified  
Dietary Supplements; Glycine Agents; Micronutrients; Non-Essential Amino Acids; Supplements  
Dietary Supplements; Micronutrients; Supplements  
Unclassified  
Hypolipidemic Agents; Vasodilator Agents; Vitamin B Complex  
Analgesics; Anti-Arhythmia Agents; Cardiovascular Agents; Vasodilator Agents  
Anticonvulsants; Carbonic Anhydrase Inhibitors; Diuretics  
Anti-Arhythmia Agents; Anticholinergic Agents; Antineoplastic Agents; Calcium Channel Blockers; Dihydropyridines; Keratolytic Agents; Vasodilator Agents  
Dietary Supplements; Micronutrients; Supplements  
Dietary Supplements; Micronutrients; Supplements  
Dietary Supplements; Micronutrients; Supplements  
Antineoplastic Agents; Protein Kinase Inhibitors; Unclassified  
Anti-Inflammatory Agents, Non-Steroidal; Cardiovascular Agents; Cyclooxygenase Inhibitors; Gout Suppressants; Hypoglycemic Agents; Tocolytic Agents; Unclassified  
Dietary Supplements; Micronutrients; Supplements  
Antineoplastic Agents; Phytogetic; Unclassified  
Unclassified  
Analgesics; Anti-Arhythmia Agents; Cardiovascular Agents; Vasodilator Agents  
Unclassified  
Dietary Supplements; Lipotropic Agents; Micronutrients; Nootropic Agents; Supplements; Unclassified  
Dietary Supplements; Micronutrients; Supplements  
Abortifacient Agents, Steroidal; Contraceptive Agents; Contraceptive Agents, Female; Contraceptives, Oral, Synthetic; Hormone Antagonists; Luteolytic Agents; Menstruation-Inducing Agents; Progestins  
Dietary Supplements; Micronutrients; Supplements  
Unclassified  
Unclassified  
Dietary Supplements; Micronutrients; Supplements  
Dietary Supplements; Micronutrients; Supplements  
Analgesics; Anti-Arhythmia Agents; Cardiovascular Agents; Vasodilator Agents  
Unclassified  
Antineoplastic Agents; Histone Deacetylase Inhibitors  
Unclassified  
Unclassified  
Antineoplastic Agents; Keratolytic Agents; Unclassified  
Analgesics; Anti-Arhythmia Agents; Cardiovascular Agents; Vasodilator Agents  
Dietary Supplements; Micronutrients; Supplements  
Unclassified  
Unclassified  
Analgesics; Anti-Arhythmia Agents; Cardiovascular Agents; Vasodilator Agents  
Abortifacient Agents, Steroidal; Anti-Inflammatory Agents; Antiemetics; Antineoplastic Agents, Hormonal; Contraceptives, Oral, Synthetic; Contraceptives, Postcoital, Synthetic; Glucocorticoids; Hormone Antagonists; Luteolytic Agents; Menstruation-Inducing Agents; Unclassified  
Dietary Supplements; Micronutrients; Supplements  
Antineoplastic Agents; Unclassified  
Dietary Supplements; Micronutrients; Supplements  
Analgesics; Anti-Arhythmia Agents; Cardiovascular Agents; Vasodilator Agents  
Dietary Supplements; Micronutrients; Supplements  
Anti-Inflammatory Agents, Non-Steroidal; Anti-glaucoma Agents; Cardiovascular Agents; Cyclooxygenase Inhibitors; Gout Suppressants; Tocolytic Agents; Unclassified  
Dietary Supplements; Micronutrients; Supplements  
Amino Acids, Essential; Analgesics; Anti-Arhythmia Agents; Antidepressive Agents, Second-Generation; Cardiovascular Agents; Dietary Supplements; Micronutrients; Supplements; Vasodilator Agents  
Analgesics; Anti-Arhythmia Agents; Antineoplastic Agents; Cardiovascular Agents; Protein Kinase Inhibitors; Unclassified; Vasodilator Agents  
Adrenergic  $\alpha$ -Agonists; Cardiotonic Agents; Dopamine Agents; Sympathomimetics; Vasconstrictor Agents  
Dietary Supplements; Glycine Agents; Micronutrients; Non-Essential Amino Acids; Supplements  
Dietary Supplements; Micronutrients; Supplements  
Anti-Impotence Agents; Phosphodiesterase 5 Inhibitors; Unclassified; Vasodilator Agents  
Dietary Supplements; Micronutrients; Supplements  
Analgesics; Anti-Arhythmia Agents; Cardiovascular Agents; Vasodilator Agents  
Dietary Supplements; Micronutrients; Supplements  
Unclassified  
Anti-HIV Agents; Antimetabolites; Reverse Transcriptase Inhibitors; Unclassified  
Anti-Arhythmia Agents; Antiemetics; Antihypertensive Agents; Antipsychotic Agents; Calcium Channel Blockers; Dopamine Antagonists; Phenothiazines; Vasodilator Agents  
Dietary Supplements; Micronutrients; Supplements  
Antihypocalcemic Agents; Antisepaptic Agents; Antithyroid Agents; Bone Density Conservation Agents; Calcium Channel Agonists; Dermatologic Agents; Vitamin D; Vitamins  
Dietary Supplements; Micronutrients; Supplements  
Dietary Supplements; Micronutrients; Supplements  
Dietary Supplements; Micronutrients; Supplements  
Diuretics; Sodium Potassium Chloride Symporter Inhibitors; Unclassified  
Analgesics; Anti-Arhythmia Agents; Cardiovascular Agents; Vasodilator Agents  
Dietary Supplements; Micronutrients; Supplements; Unclassified  
Analgesics; Anti-Arhythmia Agents; Cardiovascular Agents; Vasodilator Agents  
Analgesics; Anti-Arhythmia Agents; Cardiovascular Agents; Unclassified; Vasodilator Agents  
Dietary Supplements; Micronutrients; Supplements; Unclassified  
Anti-Bacterial Agents; Gastrointestinal Agents; Macrolides; Protein Synthesis Inhibitors  
Dietary Supplements; Micronutrients; Supplements  
Anti-Inflammatory Agents, Non-Steroidal; Antineoplastic Agents; Carcinogens; Cardiovascular Agents; Cyclooxygenase Inhibitors; Estrogens, Non-Steroidal; Gout Suppressants; Keratolytic Agents; Tocolytic Agents; Unclassified  
Unclassified  
Analgesics; Anti-Arhythmia Agents; Cardiovascular Agents; Unclassified; Vasodilator Agents  
Unclassified  
Analgesics; Anti-Arhythmia Agents; Cardiovascular Agents; Vasodilator Agents  
Dietary Supplements; Micronutrients; Supplements  
Analgesics; Anti-Arhythmia Agents; Cardiovascular Agents; Vasodilator Agents  
Anti-Arhythmia Agents; Cardiotonic Agents; Enzyme Inhibitors  
Dietary Supplements; Micronutrients; Supplements  
Unclassified  
Analgesics, Non-Narcotic; Antipyretics; Unclassified  
Unclassified  
Analgesics; Anti-Arhythmia Agents; Cardiovascular Agents; Vasodilator Agents  
Unclassified  
Analgesics; Anti-Arhythmia Agents; Cardiovascular Agents; Vasodilator Agents

**NIH Classifications**

Unclassified  
Anti-inflammatory agents (acetic acid derivatives)  
Anti-inflammatory agents (acetic acid derivatives)  
Tyrosine kinase inhibitors; Unclassified  
Anti-inflammatory agents (acetic acid derivatives)  
Anti-inflammatory agents (acetic acid derivatives)  
Anti-inflammatory agents (acetic acid derivatives); Unclassified  
Iodine-containing contrast media; Unclassified  
Anti-inflammatory agents (acetic acid derivatives)  
Unclassified  
Anti-inflammatory agents (acetic acid derivatives)  
Androgens; Calcium metabolism regulators  
Anti-inflammatory agents (acetic acid derivatives)  
Anti-inflammatory agents (acetic acid derivatives)  
Anti-inflammatory agents (acetic acid derivatives); Unclassified  
Unclassified  
Anti-inflammatory agents (acetic acid derivatives); Carbonic anhydrase inhibitors; Diuretics (furosemide type); Unclassified  
Anti-inflammatory agents (acetic acid derivatives)  
Anti-inflammatory agents (acetic acid derivatives); Iodine-containing contrast media  
Antasthmatics/antiallergics (not acting primarily as antihistamines, leukotriene biosynthesis inhibitors)  
Anti-inflammatory agents (acetic acid derivatives)  
Anti-inflammatory agents (acetic acid derivatives)  
Receptor molecules, native or modified; complement receptors  
Gabamimetics  
Iodine-containing contrast media  
Anti-inflammatory agents (acetic acid derivatives); Unclassified  
Unclassified  
Anti-inflammatory agents (acetic acid derivatives)  
Unclassified  
Anti-inflammatory agents (acetic acid derivatives)  
Anti-inflammatory agents (acetic acid derivatives)  
Antihistaminic/antiallergics (not acting primarily as antihistamines, leukotriene biosynthesis inhibitors); Phenylpyridine vasodilators (nifedipine type); Unclassified  
Anti-inflammatory agents (acetic acid derivatives)  
Anti-inflammatory agents (acetic acid derivatives)  
Benzodiazepine receptor antagonists/agonists; Tyrosine kinase inhibitors  
Angiotensin II receptor antagonists; Anti-inflammatory agents (acetic acid derivatives); Antihyperglycemics  
Anti-inflammatory contrast media  
Antandrogens; Unclassified  
Anti-inflammatory agents (acetic acid derivatives)  
Unclassified  
Anti-inflammatory agents (acetic acid derivatives)  
Unclassified  
Iodine-containing contrast media  
Progesterone receptor antagonists; Progestins; Unclassified  
Anti-inflammatory agents (acetic acid derivatives)  
Anti-inflammatory agents (acetic acid derivatives)  
Unclassified  
Iodine-containing contrast media  
Anti-inflammatory agents (acetic acid derivatives)  
Unclassified  
Anti-inflammatory agents (acetic acid derivatives)  
Unclassified  
Enzyme inhibitors; Inhibitors of histone deacetylase  
Anti-inflammatory agents (acetic acid derivatives)  
Unclassified  
Anti-inflammatory agents (acetic acid derivatives); Anesthetics; Unclassified  
Unclassified  
Anti-inflammatory agents (acetic acid derivatives)  
Anticoagulant (Factor Xa inhibitor); Unclassified  
Anti-inflammatory agents (acetic acid derivatives)  
Unclassified  
Progesterone receptor antagonists; Receptor molecules, native or modified; Unclassified; complement receptors  
Anti-inflammatory agents (acetic acid derivatives)  
Iodine-containing contrast media  
Iodine-containing contrast media  
Anti-inflammatory agents (acetic acid derivatives)  
Unclassified  
Anti-inflammatory agents (acetic acid derivatives)  
Unclassified  
Tyrosine kinase inhibitors; Unclassified  
Dopamine receptor agonists; Unclassified  
Unclassified  
Anti-inflammatory agents (acetic acid derivatives)  
Anti-inflammatory agents (acetic acid derivatives)  
PDE5 inhibitors  
Iodine-containing contrast media  
Unclassified  
Anti-inflammatory agents (acetic acid derivatives)  
Unclassified  
Anti-inflammatory agents (acetic acid derivatives); Positive inotropic agents (pimobendan type)  
Unclassified  
Iodine-containing contrast media  
Iodine-containing contrast media  
Anti-inflammatory agents (acetic acid derivatives)  
Anti-inflammatory agents (acetic acid derivatives)  
Anti-inflammatory agents (acetic acid derivatives)  
Diuretics (furosemide type); Unclassified  
Unclassified  
Anti-inflammatory agents (acetic acid derivatives)  
Unclassified  
Anti-inflammatory agents (acetic acid derivatives); Unclassified  
Anti-inflammatory agents (acetic acid derivatives); Iodine-containing contrast media  
Antibiotics (Streptomyces strains)  
Anti-inflammatory agents (acetic acid derivatives); Unclassified  
Unclassified  
Anti-inflammatory agents (acetic acid derivatives)  
Unclassified  
Growth factors  
Unclassified  
Unclassified  
Iodine-containing contrast media  
Tyrosine kinase inhibitors  
Anti-inflammatory agents (acetic acid derivatives); Unclassified  
Anti-inflammatory agents (acetic acid derivatives)  
Unclassified  
Unclassified  
Unclassified

Unclassified  
Unclassified  
Dietary Supplements; Micronutrients; Supplements  
Anti-Infective Agents, Local; Central Nervous System Depressants; Solvents  
Unclassified  
Cholinesterase Inhibitors; Nootropic Agents; Parasympathomimetics; Unclassified  
Unclassified  
Unclassified  
14-alpha Demethylase Inhibitors; Anti-Infective Agents, Local; Antifungal Agents; Unclassified  
Unclassified  
Analgesics; Anti-Arrhythmic Agents; Cardiovascular Agents; Vasodilator Agents  
Antineoplastic Agents  
Unclassified  
Antimetabolites, Antineoplastic; Antineoplastic Agents; Antiviral Agents; Immunosuppressive Agents; Purine analogues; Unclassified  
Unclassified  
Anti-menopausal Agents; Contraceptive Agents; Estrogens  
Dietary Supplements; Micronutrients; Supplements  
Unclassified  
Dietary Supplements; Micronutrients; Supplements  
Unclassified  
Amino Acids, Essential; Dietary Supplements; Micronutrients; Supplements  
Unclassified  
Antihypocalcemic Agents; Antithyroid Agents; Bone Density Conservation Agents; Vitamin D; Vitamins  
Unclassified  
Analgesics; Anti-Arrhythmic Agents; Cardiovascular Agents; Vasodilator Agents  
Analgesics; Anti-Arrhythmic Agents; Cardiovascular Agents; Vasodilator Agents  
Unclassified  
Unclassified  
Sodium Chloride Symporter Inhibitors  
Unclassified  
Unclassified  
Dietary Supplements; Micronutrients; Supplements  
Analgesics; Anti-Arrhythmic Agents; Cardiovascular Agents; Vasodilator Agents  
Analgesics; Anti-Arrhythmic Agents; Cardiovascular Agents; Vasodilator Agents  
Dietary Supplements; Micronutrients; Supplements  
Antineoplastic Agents; Protein Kinase Inhibitors  
Unclassified  
Dietary Supplements; Micronutrients; Supplements  
Unclassified  
Anticonvulsants; Carbonic Anhydrase Inhibitors; Diuretics  
Unclassified  
Analgesics; Anti-Arrhythmic Agents; Cardiovascular Agents; Vasodilator Agents  
Dietary Supplements; Micronutrients; Supplements  
Unclassified  
Analgesics; Anti-Arrhythmic Agents; Cardiovascular Agents; Vasodilator Agents  
Unclassified  
Analgesics; Anti-Arrhythmic Agents; Cardiovascular Agents; Vasodilator Agents  
Unclassified  
Unclassified  
Dietary Supplements; Glycine Agents; Micronutrients; Non-Essential Amino Acids; Supplements  
Muscle Relaxants, Skeletal; Neuromuscular Agents  
Analgesics; Anti-Arrhythmic Agents; Cardiovascular Agents; Vasodilator Agents  
Dietary Supplements; Micronutrients; Supplements  
Unclassified  
Analgesics; Anti-Arrhythmic Agents; Cardiovascular Agents; Vasodilator Agents  
Unclassified  
Analgesics; Anti-Arrhythmic Agents; Cardiovascular Agents; Vasodilator Agents  
Unclassified  
Dietary Supplements; Micronutrients; Supplements  
Second-Generation; Dietary Supplements; Micronutrients; Supplements  
Dietary Supplements; Micronutrients; Supplements  
Unclassified  
Unclassified  
Unclassified  
Anti-Bacterial Agents; Homeopathic Agents; Sulfonamides  
Dietary Supplements; Lipotropic Agents; Micronutrients; Nootropic Agents; Supplements  
Unclassified  
Analgesics; Anti-Arrhythmic Agents; Cardiovascular Agents; Vasodilator Agents  
Unclassified  
Dietary Supplements; Micronutrients; Supplements  
Antineoplastic Agents; Histone Deacetylase Inhibitors  
Unclassified  
Antiviral Agents; Enzyme Inhibitors  
Anticonvulsants; Anticoagulants; Monoamine Oxidase Inhibitors; Neuroprotective Agents  
Analgesics; Anti-Arrhythmic Agents; Cardiovascular Agents; Vasodilator Agents  
Dietary Supplements; Micronutrients; Supplements  
Unclassified  
Amino Acids, Essential; Dietary Supplements; Micronutrients; Supplements  
Dietary Supplements; Micronutrients; Supplements  
Unclassified  
Unclassified  
Unclassified  
Anti-Bacterial Agents; Homeopathic Agents; Sulfonamides  
Dietary Supplements; Lipotropic Agents; Micronutrients; Nootropic Agents; Supplements  
Unclassified  
Analgesics; Anti-Arrhythmic Agents; Cardiovascular Agents; Vasodilator Agents  
Unclassified  
Dietary Supplements; Micronutrients; Supplements  
Photosensitizing Agents; Vitamin B Complex  
Analgesics; Anti-Arrhythmic Agents; Cardiovascular Agents; Vasodilator Agents  
Unclassified  
Unclassified  
Dietary Supplements; Micronutrients; Supplements  
Analgesics; Anti-Arrhythmic Agents; Cardiovascular Agents; Vasodilator Agents  
Unclassified  
Dietary Supplements; Micronutrients; Supplements  
Dietary Supplements; Micronutrients; Supplements  
Dietary Supplements; Micronutrients; Supplements  
Dietary Supplements; Micronutrients; Supplements  
Anti-anemic Agents; Vitamin B Complex; Vitamins  
Unclassified

Anti-inflammatory agents (acetic acid derivatives)  
Anti-inflammatory agents (acetic acid derivatives)  
Anti-inflammatory agents (acetic acid derivatives)  
Unclassified  
Antibiotics (flamycin derivatives)  
Acetylcholinesterase inhibitors used in the treatment of Alzheimer's disease; Unclassified  
Antasthmatics/Antiallergics (not acting primarily as antihistamines, leukotriene biosynthesis inhibitors)  
Anti-inflammatory agents (acetic acid derivatives)  
Anti-inflammatory agents (acetic acid derivatives)  
Anti-inflammatory agents (acetic acid derivatives)  
Antidandruff agents (acetic acid derivatives)  
Antidandruff agents; Unclassified  
Unclassified  
Unclassified  
Benzotriazine receptor antagonists/agonists  
Anti-inflammatory agents (acetic acid derivatives)  
Anti-inflammatory agents (acetic acid derivatives); Antineoplastics (arabinfuranosyl derivatives); Nucleoside antiviral or antineoplastic agents, cytarabine or azarabine derivatives; Ribofuranil derivatives (pyrazofurin type)  
Tyrosine kinase inhibitors  
Tyrosine kinase inhibitors  
Anti-inflammatory agents (acetic acid derivatives)  
Iodine-containing contrast media  
Unclassified  
Antihypertensives (guanidine derivatives)  
Iodine-containing contrast media  
Antineoplastic thymidylate synthetase inhibitors  
Unclassified  
Anti-inflammatory agents (acetic acid derivatives)  
Ergot alkaloid derivatives; Unclassified  
Unclassified  
Anti-inflammatory agents (acetic acid derivatives)  
Unclassified  
Unclassified  
Anti-inflammatory agents (acetic acid derivatives)  
Unclassified  
Unclassified  
Anti-inflammatory agents (acetic acid derivatives)  
Anti-inflammatory agents (acetic acid derivatives)  
Unclassified  
Unclassified  
Anti-inflammatory agents (acetic acid derivatives)  
Tyrosine kinase inhibitors  
Antandrogens  
Anti-inflammatory agents (acetic acid derivatives)  
Anti-inflammatory agents (acetic acid derivatives)  
Anti-inflammatory agents (acetic acid derivatives)  
Unclassified  
Iodine-containing contrast media; Unclassified  
Antineoplastic thymidylate synthetase inhibitors; Phosphoro-derivatives  
Unclassified  
Anti-inflammatory agents (acetic acid derivatives)  
Anti-inflammatory agents (acetic acid derivatives)  
Unclassified  
Unclassified  
Anti-inflammatory agents (acetic acid derivatives)  
Unclassified  
Unclassified  
Anti-inflammatory agents (acetic acid derivatives)  
Unclassified  
Anti-inflammatory agents (acetic acid derivatives)  
Tyrosine kinase inhibitors  
Unclassified  
Iodine-containing contrast media  
Anti-inflammatory agents (acetic acid derivatives)  
Iodine-containing contrast media  
Unclassified  
Unclassified  
Anti-inflammatory/analgesic agents (bupropfen type)  
Unclassified  
Anti-inflammatory agents (acetic acid derivatives)  
Unclassified  
Anti-inflammatory agents (acetic acid derivatives)  
Anti-inflammatory agents (acetic acid derivatives)  
Unclassified  
Anti-inflammatory agents (acetic acid derivatives)  
Unclassified  
Anti-inflammatory agents (acetic acid derivatives)  
Benzotriazine receptor antagonists/agonists  
Unclassified  
Unclassified  
Anti-inflammatory agents (acetic acid derivatives)  
Enzyme inhibitors, inhibitors of histone deacetylase  
Unclassified  
Antiviral substances, neuraminidase inhibitors  
MAP inhibitors, type II; Unclassified  
Unclassified  
Iodine-containing contrast media  
Anti-inflammatory agents (acetic acid derivatives)  
Unclassified  
Anti-inflammatory agents (acetic acid derivatives)  
Receptor molecules, native or modified; complement receptors  
Unclassified  
Unclassified  
Anti-inflammatory agents (acetic acid derivatives)  
Iodine-containing contrast media  
Unclassified  
Unclassified  
Anti-inflammatory agents (acetic acid derivatives)  
Unclassified  
Unclassified  
Anti-inflammatory agents (acetic acid derivatives)  
Receptor molecules, native or modified; complement receptors  
Unclassified  
Anti-inflammatory agents (acetic acid derivatives)  
Receptor molecules, native or modified; complement receptors  
Unclassified  
Anti-inflammatory agents (acetic acid derivatives)  
Iodine-containing contrast media  
Iodine-containing contrast media  
Anti-inflammatory agents (acetic acid derivatives)  
Iodine-containing contrast media  
Receptor molecules, native or modified; complement receptors  
Anti-inflammatory agents (acetic acid derivatives)

Dietary Supplements, Micronutrients, Supplements  
Dietary Supplements, Micronutrients, Supplements  
Analgesics, Anti-Arrhythmia Agents, Cardiovascular Agents, Vasodilator Agents  
Dietary Supplements, Micronutrients, Supplements  
Anti-menopausal Agents, Contraceptive Agents, Estrogens  
Analgesics, Anti-Arrhythmia Agents, Cardiovascular Agents, Vasodilator Agents  
Dietary Supplements, Micronutrients, Supplements  
Unclassified  
Analgesics, Anti-Arrhythmia Agents, Cardiovascular Agents, Vasodilator Agents  
Unclassified  
Dietary Supplements, Micronutrients, Supplements  
Unclassified  
Antimetabolites, Antimetabolites, Antineoplastic; Immunosuppressive Agents  
Unclassified  
Analgesics, Anti-Arrhythmia Agents, Cardiovascular Agents, Vasodilator Agents  
Unclassified  
Antineoplastic Agents, Antineoplastic Agents, Hormonal; Estrogen Antagonists  
Unclassified  
Dietary Supplements, Micronutrients, Supplements  
Unclassified  
Unclassified  
Dietary Supplements, Micronutrients, Supplements  
Unclassified  
Analgesics, Anti-Arrhythmia Agents, Cardiovascular Agents, Vasodilator Agents  
Unclassified  
Dietary Supplements, Micronutrients, Supplements  
Dietary Supplements, Micronutrients, Supplements  
Unclassified  
Analgesics, Anti-Arrhythmia Agents, Cardiovascular Agents, Vasodilator Agents  
Unclassified  
Dietary Supplements, Micronutrients, Supplements  
Unclassified  
Unclassified  
Unclassified  
Unclassified  
Unclassified  
Contraceptive Agents; Diuretics; Mineralocorticoid Receptor Antagonists; Progestins  
Unclassified  
Unclassified  
Anticonvulsants; Carbonic Anhydrase Inhibitors; Diuretics  
Anti-inflammatory Agents, Non-Steroidal; Cyclooxygenase Inhibitors; Propionates  
Dietary Supplements, Micronutrients, Supplements  
Unclassified  
Unclassified  
Unclassified  
Unclassified  
Dietary Supplements, Micronutrients, Supplements  
Unclassified  
Dietary Supplements, Micronutrients, Supplements  
Unclassified  
Antipsychotic Agents; Dopamine Antagonists; Phenothiazines  
Dietary Supplements, Micronutrients, Supplements  
Dietary Supplements, Micronutrients, Supplements  
Unclassified  
Dietary Supplements, Micronutrients, Supplements  
Antihypocalcemic Agents; Bone Density Conservation Agents; Estrogen Antagonists; Selective Estrogen Receptor Modulators  
Unclassified  
Dietary Supplements, Micronutrients, Supplements  
Dietary Supplements, Micronutrients, Supplements  
Dietary Supplements, Micronutrients, Supplements  
Unclassified  
Anti-infective Agents, Local; Central Nervous System Depressants; Solvents  
Unclassified  
Analgesics, Anti-Arrhythmia Agents, Cardiovascular Agents, Vasodilator Agents  
Unclassified  
Dietary Supplements, Micronutrients, Supplements  
Unclassified  
Unclassified  
Dietary Supplements, Micronutrients, Supplements  
Dietary Supplements, Micronutrients, Supplements  
Dietary Supplements, Glycine Agents, Micronutrients, Non-Essential Amino Acids, Supplements  
Dietary Supplements, Micronutrients, Supplements  
Unclassified  
Unclassified  
Dietary Supplements, Micronutrients, Supplements  
Dietary Supplements, Micronutrients, Supplements  
Dietary Supplements, Micronutrients, Supplements  
Dietary Supplements, Micronutrients, Supplements  
Antiemetics; Antipsychotic Agents, Dopamine Antagonists; Phenothiazines  
Cross-Linking Reagents; Photosensitizing Agents; Pigmenting Agents  
Dietary Supplements, Micronutrients, Supplements  
Dietary Supplements, Micronutrients, Supplements  
Unclassified  
Dietary Supplements, Micronutrients, Supplements  
Antirheginal Agents; Antihypertensive Agents, Calcium Channel Blockers; Vasodilator Agents  
Dietary Supplements, Micronutrients, Supplements  
Dietary Supplements, Micronutrients, Supplements  
Unclassified  
Unclassified  
Analgesics, Anti-Arrhythmia Agents, Cardiovascular Agents, Vasodilator Agents  
Dietary Supplements, Micronutrients, Supplements  
Dietary Supplements, Micronutrients, Supplements  
Dietary Supplements, Micronutrients, Non-Essential Amino Acids, Supplements  
Unclassified  
Dietary Supplements, Vitamin B Complex  
Anticonvulsants; Carbonic Anhydrase Inhibitors; Diuretics  
Analgesics, Anti-inflammatory Agents, Non-Steroidal; Cyclooxygenase Inhibitors  
Unclassified  
Analgesics, Anti-Arrhythmia Agents, Cardiovascular Agents, Vasodilator Agents  
Dietary Supplements, Micronutrients, Supplements  
Antimutants; Antiprotocol Agents, Folic Acid Antagonists  
Dietary Supplements, Micronutrients, Supplements  
Unclassified  
Analgesics, Non-Narcotic; Antipyretics  
Unclassified  
Dietary Supplements, Micronutrients, Supplements  
Dietary Supplements, Micronutrients, Supplements  
Unclassified  
Dietary Supplements, Micronutrients, Supplements  
Dietary Supplements, Micronutrients, Supplements  
Analgesics, Anti-Arrhythmia Agents, Cardiovascular Agents, Vasodilator Agents  
Dietary Supplements, Micronutrients, Supplements  
Unclassified  
Unclassified

Anti-inflammatory agents (acetic acid derivatives)  
Iodine-containing contrast media  
Unclassified  
Unclassified  
Iodine-containing contrast media  
Unclassified  
Iodine-containing contrast media  
Anti-inflammatory agents (acetic acid derivatives)  
Unclassified  
Unclassified  
Anti-inflammatory agents (acetic acid derivatives)  
Unclassified  
Antihyperglycemics  
Estrogen antagonists  
Anti-inflammatory agents (acetic acid derivatives)  
Growth factors  
Unclassified  
Anti-inflammatory agents (acetic acid derivatives)  
Anti-inflammatory agents (acetic acid derivatives)  
Unclassified  
Anti-inflammatory agents (acetic acid derivatives)  
Anti-inflammatory agents (acetic acid derivatives)  
Unclassified  
Tyrosine kinase inhibitors  
Anti-inflammatory agents (acetic acid derivatives)  
Anti-inflammatory agents (acetic acid derivatives)  
Tyrosine kinase inhibitors  
Unclassified  
Tyrosine kinase inhibitors  
Anti-inflammatory agents (acetic acid derivatives)  
Anti-inflammatory agents (acetic acid derivatives)  
Tyrosine kinase inhibitors  
Anti-inflammatory agents (acetic acid derivatives)  
Unclassified  
Anti-inflammatory agents (acetic acid derivatives)  
Anti-inflammatory agents (acetic acid derivatives)  
Tyrosine kinase inhibitors  
Unclassified  
Anti-inflammatory agents (acetic acid derivatives); Progestins  
Anti-inflammatory agents (acetic acid derivatives)  
Carbonic anhydrase inhibitors  
Anti-inflammatory agents (acetic acid derivatives)  
Anti-inflammatory/analgesic agents (ibuprofen type)  
Anti-inflammatory agents (acetic acid derivatives)  
Antihistaminic/anticholinergics (not acting primarily as antihistamines, leukotriene biosynthesis inhibitors)  
Unclassified  
Anti-inflammatory agents (acetic acid derivatives)  
Iodine-containing contrast media  
Anti-inflammatory agents (acetic acid derivatives)  
Iodine-containing contrast media  
Anti-inflammatory agents (acetic acid derivatives)  
Anti-inflammatory agents (acetic acid derivatives)  
Iodine-containing contrast media  
Iodine-containing contrast media  
Iodine-containing contrast media  
Anti-inflammatory agents (acetic acid derivatives)  
Unclassified  
Anti-inflammatory agents (acetic acid derivatives)  
Anti-inflammatory agents (acetic acid derivatives)  
Anti-inflammatory agents (acetic acid derivatives)  
Unclassified  
Anti-inflammatory agents (acetic acid derivatives)  
Anti-inflammatory agents (acetic acid derivatives)  
Unclassified  
Iodine-containing contrast media  
Phenylpyridine vasodilators (nifedipine type)  
Anti-inflammatory agents (acetic acid derivatives)  
Unclassified  
Anti-inflammatory agents (acetic acid derivatives)  
Anti-inflammatory agents (acetic acid derivatives)  
Unclassified  
Phosphono-derivatives  
Unclassified  
Anti-inflammatory agents (acetic acid derivatives)  
Anti-inflammatory/analgesic agents (ibuprofen type)  
Unclassified  
Unclassified  
Anti-inflammatory agents (acetic acid derivatives)  
Unclassified  
Anti-inflammatory agents (acetic acid derivatives)  
Anti-inflammatory agents (acetic acid derivatives)  
Unclassified  
Anti-inflammatory agents (acetic acid derivatives)  
Anti-inflammatory agents (acetic acid derivatives)  
Unclassified  
Anti-inflammatory agents (acetic acid derivatives)  
Anti-inflammatory agents (acetic acid derivatives)  
Unclassified  
Anti-inflammatory agents (acetic acid derivatives)  
Unclassified  
Anti-inflammatory agents (acetic acid derivatives)

Unclassified  
Dietary Supplements; Micronutrients; Supplements  
Dietary Supplements; Micronutrients; Supplements  
Dietary Supplements; Micronutrients; Supplements  
Dietary Supplements; Micronutrients; Supplements  
Unclassified  
Unclassified  
Unclassified  
Unclassified  
Dietary Supplements; Micronutrients; Supplements  
Athletic Agents, Phytochemicals  
Unclassified  
Dietary Supplements; Micronutrients; Supplements  
Dietary Supplements; Micronutrients; Supplements  
Unclassified  
Dietary Supplements; Micronutrients; Supplements  
Analgesics; Anti-Arrhythmic Agents; Cardiovascular Agents; Vasodilator Agents  
Dietary Supplements; Micronutrients; Supplements  
Unclassified  
Unclassified  
Anti-inflammatory Agents, Non-steroidal; Cardiovascular Agents; Cyclooxygenase Inhibitors; Glucocorticoids; Topical Agents  
Unclassified  
Dietary Supplements; Micronutrients; Supplements  
Unclassified  
Dietary Supplements; Micronutrients; Supplements  
Unclassified  
Dietary Supplements; Micronutrients; Supplements  
Dietary Supplements; Micronutrients; Supplements  
Dietary Supplements; Micronutrients; Supplements  
Unclassified  
Dietary Supplements; Micronutrients; Supplements  
Dietary Supplements; Micronutrients; Supplements  
Dietary Supplements; Micronutrients; Supplements  
Unclassified  
Dietary Supplements; Micronutrients; Supplements  
Unclassified

Anti-inflammatory agents (acetic acid derivatives)  
Anti-inflammatory agents (acetic acid derivatives)  
Anti-inflammatory agents (acetic acid derivatives)  
Unclassified  
Anti-inflammatory agents (acetic acid derivatives)  
Unclassified  
Anti-inflammatory agents (acetic acid derivatives)  
Antihypertensives (guanidine derivatives)  
Anti-inflammatory agents (acetic acid derivatives)  
Unclassified  
Unclassified  
Anti-inflammatory agents (acetic acid derivatives)  
Unclassified  
Anti-inflammatory agents (acetic acid derivatives)  
Anti-inflammatory agents (acetic acid derivatives)  
Unclassified  
Anti-inflammatory agents (acetic acid derivatives)  
Unclassified  
Anti-inflammatory agents (acetic acid derivatives)  
Unclassified  
Anti-inflammatory agents (acetic acid derivatives)  
Iodine-containing contrast media  
Unclassified  
Anti-inflammatory agents (acetic acid derivatives)  
Anti-inflammatory agents (acetic acid derivatives)

**Supplementary Table 19. HGNC Gene Families found in drug-mutation clusters**

| <b>Mutations</b> | <b>Percentage of Mutations Belonging to Family</b> | <b>HGNC Gene Families and GO Protein Kinase</b> |
|------------------|----------------------------------------------------|-------------------------------------------------|
| 515              | 59.745                                             | Protein Kinase                                  |
| 76               | 8.817                                              | CD molecules                                    |
| 67               | 7.773                                              | Receptor Tyrosine Kinases                       |
| 41               | 4.756                                              | Nuclear hormone receptors                       |
| 25               | 2.9                                                | Fibronectin type III domain containing          |
| 24               | 2.784                                              | Immunoglobulin-like domain containing           |
| 23               | 2.668                                              | Lysine (K)-specific methyltransferases          |
| 23               | 2.668                                              | Cytochrome P450s                                |
| 22               | 2.552                                              | Glutathione S-transferases                      |
| 19               | 2.204                                              | I-set domain containing                         |
| 19               | 2.204                                              | Endogenous ligands                              |
| 17               | 1.972                                              | Cyclin-dependent kinases                        |
| 16               | 1.856                                              | SH2 domain containing                           |
| 15               | 1.74                                               | BTB (POZ) domain containing                     |
| 13               | 1.508                                              | Kelch-like                                      |
| 12               | 1.392                                              | Protein phosphatase 1 regulatory subunits       |
| 12               | 1.392                                              | Carbonic anhydrases                             |
| 10               | 1.16                                               | C1-set domain containing                        |
| 10               | 1.16                                               | Tetratricopeptide repeat domain containing      |
| 10               | 1.16                                               | ATP-binding cassette, sub-family C (CFTR/MRP)   |
| 10               | 1.16                                               | Phosphodiesterases                              |
| 10               | 1.16                                               | Complement system                               |
| 10               | 1.16                                               | Integrins                                       |
| 9                | 1.044                                              | Alcohol dehydrogenases                          |
| 9                | 1.044                                              | Chloride channels, ATP-gated CFTR               |
| 9                | 1.044                                              | Ankyrin repeat domain containing                |
| 8                | 0.928                                              | Tumor necrosis factor (ligand) superfamily      |
| 8                | 0.928                                              | Aminoacyl tRNA synthetases, Class II            |
| 8                | 0.928                                              | Fatty acid binding protein family               |
| 8                | 0.928                                              | Protein tyrosine phosphatases, receptor type    |
| 8                | 0.928                                              | Aminoacyl tRNA synthetases, Class I             |
| 8                | 0.928                                              | PHD finger proteins                             |
| 8                | 0.928                                              | V-set domain containing                         |
| 7                | 0.812                                              | Low density lipoprotein receptors               |
| 7                | 0.812                                              | Serine (or cysteine) peptidase inhibitors       |
| 7                | 0.812                                              | Mitogen-activated protein kinases               |
| 6                | 0.696                                              | Phospholipases                                  |
| 6                | 0.696                                              | Argonaute/PIWI family                           |
| 5                | 0.58                                               | Pleckstrin homology domain containing           |
| 5                | 0.58                                               | Acyl-CoA synthetase family                      |
| 5                | 0.58                                               | Cathepsins                                      |
| 5                | 0.58                                               | G patch domain containing                       |
| 5                | 0.58                                               | Heat shock 90kDa proteins                       |
| 5                | 0.58                                               | K(lysine) acetyltransferases                    |
| 5                | 0.58                                               | Fibrinogen C domain containing                  |

|   |       |                                                   |
|---|-------|---------------------------------------------------|
| 5 | 0.58  | Aldo-keto reductases                              |
| 5 | 0.58  | Interleukin receptors                             |
| 4 | 0.464 | EF-hand domain containing                         |
| 4 | 0.464 | Adhesion G protein-coupled receptors              |
| 4 | 0.464 | Aldehyde dehydrogenases                           |
| 4 | 0.464 | HAD Asp-based protein phosphatases                |
| 4 | 0.464 | Blood group antigens                              |
| 4 | 0.464 | Short chain dehydrogenase/reductase superfamily   |
| 4 | 0.464 | Gamma-aminobutyric acid (GABA) B receptors        |
| 4 | 0.464 | G protein-coupled receptors, Class B orphans      |
| 3 | 0.348 | Transient receptor potential cation channels      |
| 3 | 0.348 | Chemokine ligands                                 |
| 3 | 0.348 | Sterile alpha motif (SAM) domain containing       |
| 3 | 0.348 | Heat shock 70kDa proteins                         |
| 3 | 0.348 | Adenylate cyclases                                |
| 3 | 0.348 | Lipocalins                                        |
| 3 | 0.348 | Ribonucleases, RNase A                            |
| 3 | 0.348 | C2 domain containing phospholipases               |
| 3 | 0.348 | Protein tyrosine phosphatases, non-receptor type  |
| 3 | 0.348 | Mitogen-activated protein kinase kinase kinases   |
| 3 | 0.348 | Transglutaminases                                 |
| 3 | 0.348 | DEAD box polypeptides                             |
| 3 | 0.348 | Matrix metallopeptidases                          |
| 3 | 0.348 | Zinc fingers, MYND-type                           |
| 2 | 0.232 | Sulfatases                                        |
| 2 | 0.232 | Polymerases, DNA-directed                         |
| 2 | 0.232 | Astacins                                          |
| 2 | 0.232 | Lysine (K)-specific demethylases                  |
| 2 | 0.232 | Sulfotransferases, cytosolic                      |
| 2 | 0.232 | Chloride intracellular channels                   |
| 2 | 0.232 | Plexins                                           |
| 2 | 0.232 | Type II receptor serine/threonine kinases         |
| 2 | 0.232 | Sialic acid binding Ig-like lectins               |
| 2 | 0.232 | Prenyltransferase alpha subunit repeat containing |
| 2 | 0.232 | Interleukins                                      |
| 2 | 0.232 | Ring finger proteins                              |
| 2 | 0.232 | Mitogen-activated protein kinase kinases          |
| 2 | 0.232 | Cadherin-related                                  |
| 2 | 0.232 | Glypicans                                         |
| 2 | 0.232 | Aminopeptidases                                   |
| 1 | 0.116 | Collagens                                         |
| 1 | 0.116 | ATP-binding cassette, sub-family B (MDR/TAP)      |
| 1 | 0.116 | X-linked mental retardation                       |
| 1 | 0.116 | Butyrophilins                                     |
| 1 | 0.116 | minor histocompatibility antigens                 |
| 1 | 0.116 | Signal-regulatory proteins                        |
| 1 | 0.116 | Apolipoproteins                                   |

|     |        |                                                |
|-----|--------|------------------------------------------------|
| 1   | 0.116  | CDC-like kinases                               |
| 1   | 0.116  | INO80 complex subunits                         |
| 1   | 0.116  | ADAM metallopeptidase domain containing        |
| 1   | 0.116  | Cyclic nucleotide gated channels               |
| 1   | 0.116  | Proteases, serine                              |
| 1   | 0.116  | Polypeptide N-acetylgalactosaminyltransferases |
| 1   | 0.116  | Lipases                                        |
| 1   | 0.116  | Zinc fingers, C2H2-type                        |
| 1   | 0.116  | Solute carriers                                |
| 1   | 0.116  | Ubiquitin-conjugating enzymes E2               |
| 1   | 0.116  | DNAJ (HSP40) heat shock proteins               |
| 1   | 0.116  | WD repeat domain containing                    |
| 1   | 0.116  | Ephrins                                        |
| 1   | 0.116  | Bone morphogenetic proteins                    |
| 1   | 0.116  | Glycoprotein hormone receptors                 |
| 1   | 0.116  | Phosphorylases, glycogen                       |
| 1   | 0.116  | Protein disulfide isomerases                   |
| 1   | 0.116  | S100 calcium binding proteins                  |
| 1   | 0.116  | Fucosyltransferases                            |
| 1   | 0.116  | Tumor necrosis factor receptor superfamily     |
| 1   | 0.116  | Nudix type motif-containing                    |
| 1   | 0.116  | C2-set domain containing                       |
| 1   | 0.116  | C2 tensin-type domain containing               |
| 310 | 35.963 | Unclassified                                   |

**Supplementary Table 20. NIH drug classes observed in drug-mutation clusters**

| Paired Mutations | Percent of all Paired Mutations | NIH Classifications                                                                                        |
|------------------|---------------------------------|------------------------------------------------------------------------------------------------------------|
| 586              | 33.239                          | Anti-inflammatory agents (acetic acid derivatives)                                                         |
| 196              | 11.117                          | Iodine-containing contrast media                                                                           |
| 92               | 5.218                           | Tyrosine kinase inhibitors                                                                                 |
| 33               | 1.872                           | Calcium metabolism regulators                                                                              |
| 30               | 1.702                           | Antiasthmatics/antiallergics (not acting primarily as antihistamines, leukotriene biosynthesis inhibitors) |
| 22               | 1.248                           | PDE5 inhibitors                                                                                            |
| 12               | 0.681                           | Receptor molecules, native or modified; complement receptors                                               |
| 12               | 0.681                           | Gabamimetics                                                                                               |
| 12               | 0.681                           | Growth factors                                                                                             |
| 12               | 0.681                           | Progesterone receptor antagonists                                                                          |
| 11               | 0.624                           | Antihyperglycemics                                                                                         |
| 8                | 0.454                           | Benzodiazepine receptor antagonists/agonists                                                               |
| 6                | 0.340                           | Phenylpyridine vasodilators (nifedipine type)                                                              |
| 6                | 0.340                           | Enzyme inhibitors, inhibitors of histone deacetylase                                                       |
| 6                | 0.340                           | Progestins                                                                                                 |
| 6                | 0.340                           | Antiandrogens                                                                                              |
| 6                | 0.340                           | Carbonic anhydrase inhibitors                                                                              |
| 5                | 0.284                           | Antibiotics (Streptomyces strains)                                                                         |
| 5                | 0.284                           | Antihypertensives (guanidine derivatives)                                                                  |
| 4                | 0.227                           | Antineoplastics (arabinofuranosyl derivatives)                                                             |
| 4                | 0.227                           | Ribofuranil derivatives (pyrazofurin type)                                                                 |
| 4                | 0.227                           | Antineoplastic thymidylate synthetase inhibitors                                                           |
| 4                | 0.227                           | Dopamine receptor agonists                                                                                 |
| 3                | 0.170                           | Anti-inflammatory/analgesic agents (ibuprofen type)                                                        |
| 3                | 0.170                           | Acetylcholinesterase inhibitors used in the treatment of Alzheimer's disease                               |
| 3                | 0.170                           | Diuretics (furosemide type)                                                                                |
| 3                | 0.170                           | Antiviral substances, neuraminidase inhibitors                                                             |
| 3                | 0.170                           | Phosphoro-derivatives                                                                                      |
| 2                | 0.113                           | Estrogen antagonists                                                                                       |
| 2                | 0.113                           | Anticoagulant (Factor Xa inhibitor)                                                                        |
| 2                | 0.113                           | Nucleoside antiviral or antineoplastic agents, cytarabine or azarabine derivatives                         |
| 2                | 0.113                           | Ergot alkaloid derivatives                                                                                 |
| 2                | 0.113                           | Arotinoids                                                                                                 |
| 2                | 0.113                           | MAO inhibitors, type B                                                                                     |
| 2                | 0.113                           | Angiotensin II receptor antagonists                                                                        |
| 2                | 0.113                           | Antibiotics (rifamycin derivatives)                                                                        |
| 2                | 0.113                           | Positive inotropic agents (pimobendan type)                                                                |
| 1                | 0.057                           | Androgens                                                                                                  |



**Supplementary Table 21. DrugBank drug classes observed in drug-mutation clusters**

| <b>Paired Mutations</b> | <b>Percent of all Paired Mutations</b> | <b>DrugBank Classifications</b>                |
|-------------------------|----------------------------------------|------------------------------------------------|
| 696                     | 39.478                                 | Antineoplastic Agents                          |
| 479                     | 27.170                                 | Dietary Supplements                            |
| 478                     | 27.113                                 | Supplements                                    |
| 477                     | 27.056                                 | Micronutrients                                 |
| 199                     | 11.288                                 | Vasodilator Agents                             |
| 190                     | 10.777                                 | Anti-Arrhythmia Agents                         |
| 189                     | 10.720                                 | Analgesics                                     |
| 187                     | 10.607                                 | Cardiovascular Agents                          |
| 54                      | 3.063                                  | Bone Density Conservation Agents               |
| 50                      | 2.836                                  | Antihypocalcemic Agents                        |
| 39                      | 2.212                                  | Anticonvulsants                                |
| 34                      | 1.929                                  | Bisphosphonates                                |
| 30                      | 1.702                                  | Diuretics                                      |
| 30                      | 1.702                                  | Antiresorptives                                |
| 29                      | 1.645                                  | Calcium Channel Blockers                       |
| 29                      | 1.645                                  | Contraceptive Agents                           |
| 25                      | 1.418                                  | Carbonic Anhydrase Inhibitors                  |
| 23                      | 1.305                                  | Estrogens                                      |
| 23                      | 1.305                                  | Anti-menopausal Agents                         |
| 18                      | 1.021                                  | Hydroxymethylglutaryl-CoA Reductase Inhibitors |
| 17                      | 0.964                                  | Estrogen Antagonists                           |
| 15                      | 0.851                                  | Non-Essential Amino Acids                      |
| 15                      | 0.851                                  | Selective Estrogen Receptor Modulators         |
| 15                      | 0.851                                  | Keratolytic Agents                             |
| 14                      | 0.794                                  | Amino Acids, Essential                         |
| 14                      | 0.794                                  | Glycine Agents                                 |
| 14                      | 0.794                                  | Anti-Inflammatory Agents, Non-Steroidal        |
| 14                      | 0.794                                  | Contraceptives, Oral, Synthetic                |
| 14                      | 0.794                                  | Cyclooxygenase Inhibitors                      |
| 13                      | 0.737                                  | Anti-Inflammatory Agents                       |
| 12                      | 0.681                                  | Menstruation-Inducing Agents                   |
| 12                      | 0.681                                  | Luteolytic Agents                              |
| 12                      | 0.681                                  | Anti-Anxiety Agents                            |
| 12                      | 0.681                                  | Antiparkinson Agents                           |
| 12                      | 0.681                                  | Excitatory Amino Acid Antagonists              |
| 12                      | 0.681                                  | Abortifacient Agents, Steroidal                |
| 12                      | 0.681                                  | Contraceptives, Postcoital, Synthetic          |
| 12                      | 0.681                                  | Hormone Antagonists                            |
| 12                      | 0.681                                  | Antimanic Agents                               |
| 12                      | 0.681                                  | Phosphodiesterase 5 Inhibitors                 |

|    |       |                                          |
|----|-------|------------------------------------------|
| 11 | 0.624 | Tocolytic Agents                         |
| 11 | 0.624 | Antidepressive Agents, Second-Generation |
| 11 | 0.624 | Gout Suppressants                        |
| 9  | 0.510 | Anti-Impotence Agents                    |
| 8  | 0.454 | Antiemetics                              |
| 8  | 0.454 | Nootropic Agents                         |
| 8  | 0.454 | Antineoplastic Agents, Hormonal          |
| 8  | 0.454 | Sympathomimetics                         |
| 8  | 0.454 | Anti-Infective Agents, Local             |
| 8  | 0.454 | Antihypertensive Agents                  |
| 8  | 0.454 | Immunosuppressive Agents                 |
| 8  | 0.454 | Protein Kinase Inhibitors                |
| 7  | 0.397 | Central Nervous System Depressants       |
| 7  | 0.397 | Solvents                                 |
| 7  | 0.397 | Cardiotonic Agents                       |
| 7  | 0.397 | Anti-Bacterial Agents                    |
| 6  | 0.340 | Histone Deacetylase Inhibitors           |
| 6  | 0.340 | Anticholesteremic Agents                 |
| 6  | 0.340 | Glucocorticoids                          |
| 6  | 0.340 | Vitamins                                 |
| 6  | 0.340 | Lipotropic Agents                        |
| 6  | 0.340 | Enzyme Inhibitors                        |
| 6  | 0.340 | Vitamin B Complex                        |
| 5  | 0.284 | Gastrointestinal Agents                  |
| 5  | 0.284 | Antithyroid Agents                       |
| 5  | 0.284 | Antineoplastic Agents, Phytogetic        |
| 5  | 0.284 | Macrolides                               |
| 5  | 0.284 | Antiviral Agents                         |
| 5  | 0.284 | Progestins                               |
| 5  | 0.284 | Vitamin D                                |
| 5  | 0.284 | Protein Synthesis Inhibitors             |
| 4  | 0.227 | Antifungal Agents                        |
| 4  | 0.227 | Vasoconstrictor Agents                   |
| 4  | 0.227 | Dopamine Agents                          |
| 4  | 0.227 | Antimetabolites                          |
| 4  | 0.227 | Antiprotozoal Agents                     |
| 4  | 0.227 | Adrenergic alpha-Agonists                |
| 4  | 0.227 | Analgesics, Non-Narcotic                 |
| 4  | 0.227 | Antimetabolites, Antineoplastic          |
| 3  | 0.170 | Dihydropyridines                         |
| 3  | 0.170 | Antipyretics                             |
| 3  | 0.170 | Carcinogens                              |

|   |       |                                                |
|---|-------|------------------------------------------------|
| 3 | 0.170 | Trypanocidal Agents                            |
| 3 | 0.170 | Sodium Potassium Chloride Symporter Inhibitors |
| 3 | 0.170 | Neuromuscular Agents                           |
| 3 | 0.170 | Muscle Relaxants, Skeletal                     |
| 3 | 0.170 | Antianginal Agents                             |
| 3 | 0.170 | Antipsychotic Agents                           |
| 3 | 0.170 | Hypolipidemic Agents                           |
| 3 | 0.170 | Dopamine Antagonists                           |
| 3 | 0.170 | Estrogens, Non-Steroidal                       |
| 3 | 0.170 | Sodium Chloride Symporter Inhibitors           |
| 3 | 0.170 | Phenothiazines                                 |
| 3 | 0.170 | Photosensitizing Agents                        |
| 2 | 0.113 | Nicotinic Agonists                             |
| 2 | 0.113 | Antipsoriatic Agents                           |
| 2 | 0.113 | Anti-HIV Agents                                |
| 2 | 0.113 | Sulfonamides                                   |
| 2 | 0.113 | Mineralocorticoid Receptor Antagonists         |
| 2 | 0.113 | Monoamine Oxidase Inhibitors                   |
| 2 | 0.113 | Cholinesterase Inhibitors                      |
| 2 | 0.113 | Ganglionic Stimulants                          |
| 2 | 0.113 | Appetite Depressants                           |
| 2 | 0.113 | Dermatologic Agents                            |
| 2 | 0.113 | Antioxidants                                   |
| 2 | 0.113 | Autonomic Agents                               |
| 2 | 0.113 | Cross-Linking Reagents                         |
| 2 | 0.113 | Calcium Channel Agonists                       |
| 2 | 0.113 | Pigmenting Agents                              |
| 2 | 0.113 | Neuroprotective Agents                         |
| 2 | 0.113 | Parasympathomimetics                           |
| 2 | 0.113 | Anti-glaucoma Agents                           |
| 2 | 0.113 | Purine analogues                               |
| 2 | 0.113 | Reverse Transcriptase Inhibitors               |
| 2 | 0.113 | Homeopathic Agents                             |
| 2 | 0.113 | Hypoglycemic Agents                            |
| 1 | 0.057 | Anti-anemic Agents                             |
| 1 | 0.057 | Contraceptive Agents, Female                   |
| 1 | 0.057 | Folic Acid Antagonists                         |
| 1 | 0.057 | Antimalarials                                  |
| 1 | 0.057 | Propionates                                    |
| 1 | 0.057 | 14-alpha Demethylase Inhibitors                |
| 1 | 0.057 | Nutritional Support                            |

Supplementary Table 22. Prioritized putative functional variants in rank order by closeness centrality

| Closeness Centrality | No. patient samples | ClinVar Annotation (Likelihood of pathogenicity) | HGVSp Protein Annotation | Transcript (Ensembl74) | Protein | HGNC Gene Family                                                                            |
|----------------------|---------------------|--------------------------------------------------|--------------------------|------------------------|---------|---------------------------------------------------------------------------------------------|
| 48.41880559          | 3                   | NULL                                             | p.M133K                  | ENST00000445888        | TP53    | Unclassified                                                                                |
| 31.95012072          | 1                   | NULL                                             | p.L380In_frame_del       | ENST00000396611        | PIK3R1  | SH2_domain_containing                                                                       |
| 28.12904525          | 1                   | NULL                                             | p.H168R                  | ENST00000445888        | TP53    | Unclassified                                                                                |
| 28.12904525          | 1                   | NULL                                             | p.H168P                  | ENST00000445888        | TP53    | Unclassified                                                                                |
| 27.87368317          | 1                   | NULL                                             | p.A59T                   | ENST00000256078        | KRAS    | RAS_type_family_GTPases                                                                     |
| 27.87368317          | 1                   | NULL                                             | p.A59G                   | ENST00000256078        | KRAS    | RAS_type_family_GTPases                                                                     |
| 27.87368317          | 1                   | NULL                                             | p.A59E                   | ENST00000256078        | KRAS    | RAS_type_family_GTPases                                                                     |
| 27.59976191          | 2                   | NULL                                             | p.S240G                  | ENST00000445888        | TP53    | Unclassified                                                                                |
| 26.92128345          | 1                   | NULL                                             | p.F134V                  | ENST00000445888        | TP53    | Unclassified                                                                                |
| 26.92128345          | 2                   | NULL                                             | p.F134L                  | ENST00000445888        | TP53    | Unclassified                                                                                |
| 26.65042544          | 2                   | NULL                                             | p.R196P                  | ENST00000445888        | TP53    | Unclassified                                                                                |
| 20.17381059          | 1                   | NULL                                             | p.R109K                  | ENST00000415913        | IDH1    | Unclassified                                                                                |
| 18.33718489          | 1                   | NULL                                             | p.L137Q                  | ENST00000445888        | TP53    | Unclassified                                                                                |
| 17.47192205          | 1                   | NULL                                             | p.I251S                  | ENST00000445888        | TP53    | Unclassified                                                                                |
| 17.31170952          | 2                   | NULL                                             | p.K379N                  | ENST00000396611        | PIK3R1  | SH2_domain_containing                                                                       |
| 17.31170952          | 1                   | NULL                                             | p.K379E                  | ENST00000396611        | PIK3R1  | SH2_domain_containing                                                                       |
| 12.40718061          | 1                   | NULL                                             | p.461In_frame_insREKS    | ENST00000396611        | PIK3R1  | SH2_domain_containing                                                                       |
| 9.82216427           | 2                   | NULL                                             | p.S467L                  | ENST00000288602        | BRAF    | Unclassified                                                                                |
| 9.313584339          | 1                   | NULL                                             | p.R139G                  | ENST00000361570        | CDKN2A  | Unclassified                                                                                |
| 9.313584339          | 4                   | NULL                                             | p.A138V                  | ENST00000361570        | CDKN2A  | Unclassified                                                                                |
| 9.01433212           | 1                   | NULL                                             | p.Q958R                  | ENST00000263967        | PIK3CA  | Phosphatidylinositol_3-kinase_subunits                                                      |
| 7.715704853          | 1                   | NULL                                             | p.F90S                   | ENST00000371953        | PTEN    | C2_tensin-type_domain_containing Dual_specificity_phosphatases                              |
| 6.20480619           | 1                   | NULL                                             | p.D537Y                  | ENST00000342988        | SMAD4   | SMAD_family                                                                                 |
| 6.20480619           | 1                   | NULL                                             | p.D537V                  | ENST00000342988        | SMAD4   | SMAD_family                                                                                 |
| 6.20480619           | 1                   | NULL                                             | p.D537G                  | ENST00000342988        | SMAD4   | SMAD_family                                                                                 |
| 6.20480619           | 1                   | NULL                                             | p.D537E                  | ENST00000342988        | SMAD4   | SMAD_family                                                                                 |
| 6.175116951          | 2                   | NULL                                             | p.P471L                  | ENST00000263967        | PIK3CA  | Phosphatidylinositol_3-kinase_subunits                                                      |
| 6.175116951          | 1                   | NULL                                             | p.P471A                  | ENST00000263967        | PIK3CA  | Phosphatidylinositol_3-kinase_subunits                                                      |
| 6.013880515          | 1                   | NULL                                             | p.D560H                  | ENST00000396611        | PIK3R1  | SH2_domain_containing                                                                       |
| 6.013880515          | 2                   | NULL                                             | p.D560G                  | ENST00000396611        | PIK3R1  | SH2_domain_containing                                                                       |
| 5.927272214          | 1                   | NULL                                             | p.L70H                   | ENST00000371953        | PTEN    | C2_tensin-type_domain_containing Dual_specificity_phosphatases                              |
| 5.558446135          | 1                   | NULL                                             | p.E62K                   | ENST00000256078        | KRAS    | RAS_type_family_GTPases                                                                     |
| 5.516677126          | 1                   | Pathogenic                                       | p.S65W                   | ENST00000256474        | VHL     | Unclassified                                                                                |
| 5.516677126          | 2                   | NULL                                             | p.S65L                   | ENST00000256474        | VHL     | Unclassified                                                                                |
| 5.383646501          | 2                   | NULL                                             | p.D594N                  | ENST00000288602        | BRAF    | Unclassified                                                                                |
| 5.383646501          | 1                   | NULL                                             | p.D594H                  | ENST00000288602        | BRAF    | Unclassified                                                                                |
| 5.383646501          | 1                   | NULL                                             | p.D594G                  | ENST00000288602        | BRAF    | Unclassified                                                                                |
| 5.122446591          | 2                   | NULL                                             | p.C71Y                   | ENST00000371953        | PTEN    | C2_tensin-type_domain_containing Dual_specificity_phosphatases                              |
| 5.108581382          | 1                   | NULL                                             | p.R789Q                  | ENST00000274376        | RASA1   | C2_and_RasGAP_domain_containing Pleckstrin_homology_domain_containing SH2_domain_containing |
| 5.108581382          | 1                   | NULL                                             | p.R789L                  | ENST00000274376        | RASA1   | C2_and_RasGAP_domain_containing Pleckstrin_homology_domain_containing SH2_domain_containing |
| 5.005043401          | 2                   | Pathogenic                                       | p.H93R                   | ENST00000371953        | PTEN    | C2_tensin-type_domain_containing Dual_specificity_phosphatases                              |
| 5.005043401          | 1                   | NULL                                             | p.H93L                   | ENST00000371953        | PTEN    | C2_tensin-type_domain_containing Dual_specificity_phosphatases                              |
| 4.882928745          | 1                   | NULL                                             | p.R389H                  | ENST00000382580        | CHEK2   | Unclassified                                                                                |
| 4.882928745          | 1                   | NULL                                             | p.R389G                  | ENST00000382580        | CHEK2   | Unclassified                                                                                |
| 4.882928745          | 1                   | NULL                                             | p.R389C                  | ENST00000382580        | CHEK2   | Unclassified                                                                                |
| 4.784147755          | 1                   | NULL                                             | p.Q171K                  | ENST00000371953        | PTEN    | C2_tensin-type_domain_containing Dual_specificity_phosphatases                              |
| 4.664303134          | 2                   | NULL                                             | p.E365V                  | ENST00000263967        | PIK3CA  | Phosphatidylinositol_3-kinase_subunits                                                      |
| 4.664303134          | 2                   | NULL                                             | p.E365K                  | ENST00000263967        | PIK3CA  | Phosphatidylinositol_3-kinase_subunits                                                      |
| 4.630001099          | 1                   | NULL                                             | p.F254I                  | ENST00000275493        | EGFR    | Receptor_Tyrosine_Kinases                                                                   |
| 4.540138193          | 1                   | Uncertain_significance                           | p.L861R                  | ENST00000275493        | EGFR    | Receptor_Tyrosine_Kinases                                                                   |
| 4.540138193          | 3                   | NULL                                             | p.L861Q                  | ENST00000275493        | EGFR    | Receptor_Tyrosine_Kinases                                                                   |
| 4.180603825          | 1                   | NULL                                             | p.I36M                   | ENST00000256078        | KRAS    | RAS_type_family_GTPases                                                                     |
| 4.001016126          | 1                   | NULL                                             | p.D956H                  | ENST00000343537        | TP53BP2 | Ankyrin_repeat_domain_containing Protein_phosphatase_1_regulatory_subunits                  |
| 3.965100103          | 2                   | NULL                                             | p.Y545C                  | ENST00000603548        | FBXW7   | F-box_and_WD_repeat_domain_containing WD_repeat_domain_containing                           |
| 3.87047826           | 1                   | Uncertain_significance                           | p.G127V                  | ENST00000371953        | PTEN    | C2_tensin-type_domain_containing Dual_specificity_phosphatases                              |
| 3.87047826           | 3                   | Pathogenic                                       | p.G127R                  | ENST00000371953        | PTEN    | C2_tensin-type_domain_containing Dual_specificity_phosphatases                              |
| 3.864313046          | 2                   | NULL                                             | p.G129V                  | ENST00000371953        | PTEN    | C2_tensin-type_domain_containing Dual_specificity_phosphatases                              |
| 3.864313046          | 2                   | Pathogenic                                       | p.G129E                  | ENST00000371953        | PTEN    | C2_tensin-type_domain_containing Dual_specificity_phosphatases                              |
| 3.807783423          | 1                   | NULL                                             | p.S426L                  | ENST00000603548        | FBXW7   | F-box_and_WD_repeat_domain_containing WD_repeat_domain_containing                           |
| 3.74191187           | 1                   | NULL                                             | p.W88R                   | ENST00000256474        | VHL     | Unclassified                                                                                |
| 3.74191187           | 2                   | NULL                                             | p.W88L                   | ENST00000256474        | VHL     | Unclassified                                                                                |
| 3.645542562          | 1                   | NULL                                             | p.D537Y                  | ENST00000342988        | SMAD4   | SMAD_family                                                                                 |
| 3.645542562          | 1                   | NULL                                             | p.D537V                  | ENST00000342988        | SMAD4   | SMAD_family                                                                                 |
| 3.645542562          | 1                   | NULL                                             | p.D537G                  | ENST00000342988        | SMAD4   | SMAD_family                                                                                 |
| 3.645542562          | 1                   | NULL                                             | p.D537E                  | ENST00000342988        | SMAD4   | SMAD_family                                                                                 |
| 3.61363956           | 2                   | NULL                                             | p.G114R                  | ENST00000256474        | VHL     | Unclassified                                                                                |
| 3.61363956           | 2                   | NULL                                             | p.G114R                  | ENST00000256474        | VHL     | Unclassified                                                                                |

|             |   |                        |                            |                 |         |                                                                              |
|-------------|---|------------------------|----------------------------|-----------------|---------|------------------------------------------------------------------------------|
| 3.524810784 | 2 | NULL                   | p.R139Q                    | ENST00000361570 | CDKN2A  | Unclassified                                                                 |
| 3.508825341 | 1 | NULL                   | p.S69in_frame_insD         | ENST00000396611 | PIK3R1  | SH2_domain_containing                                                        |
| 3.508825341 | 1 | NULL                   | p.A69in_frame_insGLYE      | ENST00000396611 | PIK3R1  | SH2_domain_containing                                                        |
| 3.482561942 | 3 | NULL                   | p.G1049R                   | ENST00000263967 | PIK3CA  | Phosphatidylinositol_3-kinase_subunits                                       |
| 3.359889684 | 1 | NULL                   | p.T80R                     | ENST00000397062 | NFE2L2  | Basic_leucine_zipper_proteins                                                |
| 3.359889684 | 2 | NULL                   | p.T80P                     | ENST00000397062 | NFE2L2  | Basic_leucine_zipper_proteins                                                |
| 3.359889684 | 1 | NULL                   | p.T80K                     | ENST00000397062 | NFE2L2  | Basic_leucine_zipper_proteins                                                |
| 3.315453444 | 3 | NULL                   | p.L62R                     | ENST00000275493 | EGFR    | Receptor_Tyrosine_Kinases                                                    |
| 3.260166059 | 1 | NULL                   | p.H115Y                    | ENST00000256474 | VHL     | Unclassified                                                                 |
| 3.260166059 | 2 | NULL                   | p.H115N                    | ENST00000256474 | VHL     | Unclassified                                                                 |
| 3.184867508 | 1 | NULL                   | p.D450N                    | ENST00000402690 | SMAD2   | SMAD_family                                                                  |
| 3.129769274 | 1 | NULL                   | p.DRLY464in_frame_del      | ENST00000396611 | PIK3R1  | SH2_domain_containing                                                        |
| 3.129769274 | 1 | NULL                   | p.D464V                    | ENST00000396611 | PIK3R1  | SH2_domain_containing                                                        |
| 3.089348297 | 1 | NULL                   | p.R415H                    | ENST00000393623 | KEAP1   | BTB_(POZ)_domain_containing Kelch-like                                       |
| 3.089348297 | 1 | NULL                   | p.R415C                    | ENST00000393623 | KEAP1   | BTB_(POZ)_domain_containing Kelch-like                                       |
| 3.016291602 | 1 | NULL                   | p.S256Y                    | ENST00000322088 | PPP2R1A | Protein_phosphatase_2_regulatory_subunits                                    |
| 3.016291602 | 3 | NULL                   | p.S256F                    | ENST00000322088 | PPP2R1A | Protein_phosphatase_2_regulatory_subunits                                    |
| 3.001930343 | 1 | NULL                   | p.R405                     | ENST00000264497 | IL21    | Interleukins                                                                 |
| 3.001930343 | 3 | NULL                   | p.R40H                     | ENST00000264497 | IL21    | Interleukins                                                                 |
| 2.837601759 | 1 | NULL                   | p.Y79S                     | ENST00000522337 | TCEB1   | Unclassified                                                                 |
| 2.837601759 | 1 | NULL                   | p.Y79N                     | ENST00000522337 | TCEB1   | Unclassified                                                                 |
| 2.837601759 | 1 | NULL                   | p.Y79F                     | ENST00000522337 | TCEB1   | Unclassified                                                                 |
| 2.67258227  | 2 | NULL                   | p.R268H                    | ENST00000327367 | SMAD3   | SMAD_family                                                                  |
| 2.67258227  | 1 | NULL                   | p.R268C                    | ENST00000327367 | SMAD3   | SMAD_family                                                                  |
| 2.655319912 | 1 | NULL                   | p.C90Y                     | ENST00000263967 | PIK3CA  | Phosphatidylinositol_3-kinase_subunits                                       |
| 2.655319912 | 1 | NULL                   | p.C90G                     | ENST00000263967 | PIK3CA  | Phosphatidylinositol_3-kinase_subunits                                       |
| 2.550533232 | 1 | NULL                   | p.R483H                    | ENST00000393623 | KEAP1   | BTB_(POZ)_domain_containing Kelch-like                                       |
| 2.550533232 | 1 | NULL                   | p.R483C                    | ENST00000393623 | KEAP1   | BTB_(POZ)_domain_containing Kelch-like                                       |
| 2.532499981 | 2 | NULL                   | p.A178V                    | ENST00000356142 | RAC1    | Endogenous_ligands Rho_family_GTPases                                        |
| 2.514557644 | 2 | NULL                   | p.PVPHGLEDL447in_frame_del | ENST00000263967 | PIK3CA  | Phosphatidylinositol_3-kinase_subunits                                       |
| 2.512428361 | 1 | NULL                   | p.G596D                    | ENST00000288602 | BRAF    | Unclassified                                                                 |
| 2.379273653 | 1 | NULL                   | p.L597Q                    | ENST00000288602 | BRAF    | Unclassified                                                                 |
| 2.346200201 | 1 | NULL                   | p.A11D                     | ENST00000311189 | HRAS    | RAS_type_family_GTPases                                                      |
| 2.319236077 | 1 | NULL                   | p.V85M                     | ENST00000275493 | EGFR    | Receptor_Tyrosine_Kinases                                                    |
| 2.302171553 | 1 | NULL                   | p.L116in_frame_del         | ENST00000256474 | VHL     | Unclassified                                                                 |
| 2.25560293  | 1 | NULL                   | p.C162Y                    | ENST00000256474 | VHL     | Unclassified                                                                 |
| 2.203357558 | 1 | NULL                   | p.D1029H                   | ENST00000263967 | PIK3CA  | Phosphatidylinositol_3-kinase_subunits                                       |
| 2.182287415 | 1 | NULL                   | p.D109in_frame_del         | ENST00000361570 | CDKN2A  | Unclassified                                                                 |
| 2.172632678 | 3 | NULL                   | p.H304Y                    | ENST00000275493 | EGFR    | Receptor_Tyrosine_Kinases                                                    |
| 2.095804869 | 1 | NULL                   | p.R729W                    | ENST00000321117 | DNMT3A  | Unclassified                                                                 |
| 2.095804869 | 2 | NULL                   | p.R729Q                    | ENST00000321117 | DNMT3A  | Unclassified                                                                 |
| 2.023601134 | 2 | NULL                   | p.D198N                    | ENST00000300305 | RUNX1   | Unclassified                                                                 |
| 2.023601134 | 1 | NULL                   | p.D198G                    | ENST00000300305 | RUNX1   | Unclassified                                                                 |
| 2.017673887 | 1 | NULL                   | p.R144H                    | ENST00000322088 | PPP2R1A | Protein_phosphatase_2_regulatory_subunits                                    |
| 2.017673887 | 1 | NULL                   | p.R144C                    | ENST00000322088 | PPP2R1A | Protein_phosphatase_2_regulatory_subunits                                    |
| 2.014694447 | 1 | NULL                   | p.W131R                    | ENST00000393331 | SPOP    | BTB_(POZ)_domain_containing                                                  |
| 2.014694447 | 1 | NULL                   | p.W131G                    | ENST00000393331 | SPOP    | BTB_(POZ)_domain_containing                                                  |
| 2.014694447 | 1 | NULL                   | p.W131C                    | ENST00000393331 | SPOP    | BTB_(POZ)_domain_containing                                                  |
| 1.983348841 | 1 | NULL                   | p.E84V                     | ENST00000275493 | EGFR    | Receptor_Tyrosine_Kinases                                                    |
| 1.972091686 | 1 | NULL                   | p.M291I                    | ENST00000415913 | IDH1    | Unclassified                                                                 |
| 1.940841816 | 1 | Uncertain_significance | p.L833V                    | ENST00000275493 | EGFR    | Receptor_Tyrosine_Kinases                                                    |
| 1.940841816 | 1 | NULL                   | p.L833F                    | ENST00000275493 | EGFR    | Receptor_Tyrosine_Kinases                                                    |
| 1.93763312  | 1 | NULL                   | p.I1864V                   | ENST00000382044 | TP53BP1 | Unclassified                                                                 |
| 1.874759582 | 2 | NULL                   | p.G143K                    | ENST00000361570 | CDKN2A  | Unclassified                                                                 |
| 1.804391348 | 1 | NULL                   | p.R832H                    | ENST00000275493 | EGFR    | Receptor_Tyrosine_Kinases                                                    |
| 1.729902486 | 1 | NULL                   | p.R135R                    | ENST00000356142 | RAC1    | Endogenous_ligands Rho_family_GTPases                                        |
| 1.729902486 | 1 | NULL                   | p.R135N                    | ENST00000356142 | RAC1    | Endogenous_ligands Rho_family_GTPases                                        |
| 1.691769746 | 1 | NULL                   | p.C18Y                     | ENST00000356142 | RAC1    | Endogenous_ligands Rho_family_GTPases                                        |
| 1.691769746 | 1 | NULL                   | p.C18F                     | ENST00000356142 | RAC1    | Endogenous_ligands Rho_family_GTPases                                        |
| 1.675974269 | 1 | NULL                   | p.S618L                    | ENST00000380982 | FLT3    | CD_molecules Immunoglobulin-like_domain_containing Receptor_Tyrosine_Kinases |
| 1.497369249 | 1 | NULL                   | p.V220M                    | ENST00000322088 | PPP2R1A | Protein_phosphatase_2_regulatory_subunits                                    |
| 1.381239623 | 1 | NULL                   | p.Y47C                     | ENST00000382580 | CHEK2   | Unclassified                                                                 |
| 1.278335779 | 2 | NULL                   | p.R90C                     | ENST00000284818 | LY96    | Unclassified                                                                 |
| 1.26772085  | 1 | NULL                   | p.E439K                    | ENST00000355622 | TLR4    | CD_molecules                                                                 |
| 1.26772085  | 1 | NULL                   | p.E439A                    | ENST00000355622 | TLR4    | CD_molecules                                                                 |
| 1.264288905 | 1 | NULL                   | p.M50V                     | ENST00000216225 | RBX1    | Ring_finger_proteins                                                         |
| 1.264288905 | 1 | NULL                   | p.M50I                     | ENST00000216225 | RBX1    | Ring_finger_proteins                                                         |
| 1.190534559 | 1 | NULL                   | p.G543W                    | ENST00000602748 | CUL1    | Unclassified                                                                 |
| 1.190534559 | 1 | NULL                   | p.G543R                    | ENST00000602748 | CUL1    | Unclassified                                                                 |
| 1.153952922 | 1 | NULL                   | p.P305Q                    | ENST00000402690 | SMAD2   | SMAD_family                                                                  |

|             |   |      |                            |                 |           |                                                                                                     |
|-------------|---|------|----------------------------|-----------------|-----------|-----------------------------------------------------------------------------------------------------|
| 1.153952922 | 1 | NULL | p.P305L                    | ENST00000402690 | SMAD2     | SMAD_family                                                                                         |
| 1.148857106 | 2 | NULL | p.G617E                    | ENST00000380982 | FLT3      | CD_molecules Immunoglobulin-like_domain_containing Receptor_Tyrosine_Kinases                        |
| 1.135525831 | 1 | NULL | p.R506S                    | ENST00000602748 | CUL1      | Unclassified                                                                                        |
| 1.135525831 | 1 | NULL | p.R506H                    | ENST00000602748 | CUL1      | Unclassified                                                                                        |
| 1.124093262 | 1 | NULL | p.A59T                     | ENST00000311189 | HRAS      | RAS_type_family_GTPases                                                                             |
| 1.116786255 | 2 | NULL | p.K125Q                    | ENST00000284818 | LY96      | Unclassified                                                                                        |
| 1.112772008 | 1 | NULL | p.E758Q                    | ENST00000602748 | CUL1      | Unclassified                                                                                        |
| 1.112772008 | 1 | NULL | p.E758D                    | ENST00000602748 | CUL1      | Unclassified                                                                                        |
| 1.105733219 | 1 | NULL | p.A22V                     | ENST00000303910 | HIST1H2AE | Histones                                                                                            |
| 1.105733219 | 1 | NULL | p.A22T                     | ENST00000303910 | HIST1H2AE | Histones                                                                                            |
| 1.105618744 | 2 | NULL | p.G1533E                   | ENST00000256935 | DOCK2     | Unclassified                                                                                        |
| 1.073963668 | 1 | NULL | p.S476R                    | ENST00000603548 | FBXW7     | F-box_and_WD_repeat_domain_containing WD_repeat_domain_containing                                   |
| 1.073963668 | 1 | NULL | p.S476I                    | ENST00000603548 | FBXW7     | F-box_and_WD_repeat_domain_containing WD_repeat_domain_containing                                   |
| 1.014138155 | 2 | NULL | p.S276L                    | ENST00000402690 | SMAD2     | SMAD_family                                                                                         |
| 1.009112638 | 2 | NULL | p.L1527H                   | ENST00000256935 | DOCK2     | Unclassified                                                                                        |
| 1.008946033 | 1 | NULL | p.TKAVTKYTS117in_frame_del | ENST00000274764 | HIST1H2BA | Histones                                                                                            |
| 1.008946033 | 1 | NULL | p.T117A                    | ENST00000274764 | HIST1H2BA | Histones                                                                                            |
| 1.00614634  | 1 | NULL | p.C18Y                     | ENST00000356142 | RAC1      | Endogenous_ligands Rho_family_GTPases                                                               |
| 1.00614634  | 1 | NULL | p.C18F                     | ENST00000356142 | RAC1      | Endogenous_ligands Rho_family_GTPases                                                               |
| 1.001436456 | 1 | NULL | p.R34S                     | ENST00000264497 | IL21      | Interleukins                                                                                        |
| 1.001436456 | 1 | NULL | p.R34C                     | ENST00000264497 | IL21      | Interleukins                                                                                        |
| 0.991347685 | 1 | NULL | p.G509W                    | ENST00000393623 | KEAP1     | BTB_(POZ)_domain_containing Kelch-like                                                              |
| 0.881715083 | 1 | NULL | p.I319S                    | ENST00000382580 | CHEK2     | Unclassified                                                                                        |
| 0.843299045 | 1 | NULL | p.D109H                    | ENST00000361570 | CDKN2A    | Unclassified                                                                                        |
| 0.840210304 | 1 | NULL | p.S546L                    | ENST00000603548 | FBXW7     | F-box_and_WD_repeat_domain_containing WD_repeat_domain_containing                                   |
| 0.754925512 | 1 | NULL | p.T385K                    | ENST00000603548 | FBXW7     | F-box_and_WD_repeat_domain_containing WD_repeat_domain_containing                                   |
| 0.695975198 | 1 | NULL | p.D355G                    | ENST00000342988 | SMAD4     | SMAD_family                                                                                         |
| 0.635102071 | 1 | NULL | p.S585T                    | ENST00000603548 | FBXW7     | F-box_and_WD_repeat_domain_containing WD_repeat_domain_containing                                   |
| 0.630996627 | 1 | NULL | p.G437R                    | ENST00000603548 | FBXW7     | F-box_and_WD_repeat_domain_containing WD_repeat_domain_containing                                   |
| 0.598317025 | 1 | NULL | p.D33N                     | ENST00000311189 | HRAS      | RAS_type_family_GTPases                                                                             |
| 0.592853736 | 1 | NULL | p.D33N                     | ENST00000311189 | HRAS      | RAS_type_family_GTPases                                                                             |
| 0.572090204 | 1 | NULL | p.D355G                    | ENST00000342988 | SMAD4     | SMAD_family                                                                                         |
| 0.47875245  | 1 | NULL | p.D304G                    | ENST00000402690 | SMAD2     | SMAD_family                                                                                         |
| 0.460030453 | 1 | NULL | p.T145P                    | ENST00000322088 | PPP2R1A   | Protein_phosphatase_2_regulatory_subunits                                                           |
| 0.456319897 | 1 | NULL | p.R543G                    | ENST00000603548 | FBXW7     | F-box_and_WD_repeat_domain_containing WD_repeat_domain_containing                                   |
| 0.407839542 | 1 | NULL | p.G15S                     | ENST00000356142 | RAC1      | Endogenous_ligands Rho_family_GTPases                                                               |
| 0.366856295 | 1 | NULL | p.L173M                    | ENST00000322088 | PPP2R1A   | Protein_phosphatase_2_regulatory_subunits                                                           |
| 0.336982472 | 1 | NULL | p.Q405L                    | ENST00000327367 | SMAD3     | SMAD_family                                                                                         |
| 0.306240843 | 1 | NULL | p.F261L                    | ENST00000270172 | DNMT3L    | Unclassified                                                                                        |
| 0.267827058 | 1 | NULL | p.G603W                    | ENST00000393623 | KEAP1     | BTB_(POZ)_domain_containing Kelch-like                                                              |
| 0.252921821 | 1 | NULL | p.H147Y                    | ENST00000263915 | GRB14     | Pleckstrin_homology_domain_containing SH2_domain_containing                                         |
| 0.246188708 | 1 | NULL | p.N39S                     | ENST00000356142 | RAC1      | Endogenous_ligands Rho_family_GTPases                                                               |
| 0.245795419 | 1 | NULL | p.S143F                    | ENST00000322088 | PPP2R1A   | Protein_phosphatase_2_regulatory_subunits                                                           |
| 0.242051211 | 1 | NULL | p.T468A                    | ENST00000287820 | PPARG     | Nuclear_hormone_receptors                                                                           |
| 0.238728725 | 1 | NULL | p.M266I                    | ENST00000315985 | PPP2R2A   | Protein_phosphatase_2_regulatory_subunits WD_repeat_domain_containing                               |
| 0.228419611 | 1 | NULL | p.D215H                    | ENST00000322088 | PPP2R1A   | Protein_phosphatase_2_regulatory_subunits                                                           |
| 0.221677401 | 1 | NULL | p.S67L                     | ENST00000522337 | TCEB1     | Unclassified                                                                                        |
| 0.197937855 | 1 | NULL | p.K121E                    | ENST00000541790 | HIST1H2BJ | Histones                                                                                            |
| 0.19562623  | 1 | NULL | p.R105Q                    | ENST00000322088 | PPP2R1A   | Protein_phosphatase_2_regulatory_subunits                                                           |
| 0.182362042 | 1 | NULL | p.G524C                    | ENST00000393623 | KEAP1     | BTB_(POZ)_domain_containing Kelch-like                                                              |
| 0.182281806 | 1 | NULL | p.T90I                     | ENST00000216225 | RBX1      | Ring_finger_proteins                                                                                |
| 0.172255034 | 1 | NULL | p.M330I                    | ENST00000602142 | VAV1      | Pleckstrin_homology_domain_containing Rho_guanine_nucleotide_exchange_factors SH2_domain_containing |
| 0.164865791 | 1 | NULL | p.A61V                     | ENST00000216225 | RBX1      | Ring_finger_proteins                                                                                |
| 0.164379252 | 1 | NULL | p.G477S                    | ENST00000393623 | KEAP1     | BTB_(POZ)_domain_containing Kelch-like                                                              |
| 0.154397858 | 1 | NULL | p.L434F                    | ENST00000382580 | CHEK2     | Unclassified                                                                                        |
| 0.152620053 | 1 | NULL | p.L419F                    | ENST00000355622 | TLR4      | CD_molecules                                                                                        |
| 0.151035766 | 1 | NULL | p.A11D                     | ENST00000311189 | HRAS      | RAS_type_family_GTPases                                                                             |
| 0.147249329 | 1 | NULL | p.R329W                    | ENST00000367980 | NR1I3     | Nuclear_hormone_receptors                                                                           |
| 0.143697825 | 1 | NULL | p.R321Q                    | ENST00000370187 | BTRC      | F-box_and_WD_repeat_domain_containing WD_repeat_domain_containing                                   |
| 0.143580833 | 1 | NULL | p.L446V                    | ENST00000402690 | SMAD2     | SMAD_family                                                                                         |
| 0.141148073 | 1 | NULL | p.Q61R                     | ENST00000356142 | RAC1      | Endogenous_ligands Rho_family_GTPases                                                               |
| 0.138819086 | 1 | NULL | p.N942H                    | ENST00000274376 | RASA1     | C2_and_RasGAP_domain_containing Pleckstrin_homology_domain_containing SH2_domain_containing         |
| 0.13247423  | 1 | NULL | p.S86G                     | ENST00000522337 | TCEB1     | Unclassified                                                                                        |
| 0.132377231 | 1 | NULL | p.G173A                    | ENST00000361570 | CDKN2A    | Unclassified                                                                                        |
| 0.129507766 | 1 | NULL | p.D300N                    | ENST00000402690 | SMAD2     | SMAD_family                                                                                         |
| 0.117448402 | 1 | NULL | p.D77G                     | ENST00000397062 | NFE2L2    | Basic_leucine_zipper_proteins                                                                       |
| 0.101555192 | 1 | NULL | p.G333S                    | ENST00000393623 | KEAP1     | BTB_(POZ)_domain_containing Kelch-like                                                              |
| 0.099119113 | 1 | NULL | p.R383W                    | ENST00000395472 | SOCS4     | SH2_domain_containing Suppressors_of_cytokine_signaling                                             |
| 0.097458251 | 1 | NULL | p.G527F                    | ENST00000393623 | KEAP1     | BTB_(POZ)_domain_containing Kelch-like                                                              |
| 0.089629197 | 1 | NULL | p.R82C                     | ENST00000522337 | TCEB1     | Unclassified                                                                                        |

|             |   |      |          |                 |           |                                                                                                                                          |
|-------------|---|------|----------|-----------------|-----------|------------------------------------------------------------------------------------------------------------------------------------------|
| 0.081572836 | 1 | NULL | p.R2015H | ENST00000361243 | AKAP13    | A-kinase_anchor_proteins Pleckstrin_homology_domain_containing Rho_guanine_nucleotide_exchange_factors minor_histocompatibility_antigens |
| 0.081216245 | 1 | NULL | p.F440L  | ENST00000355622 | TLR4      | CD_molecules                                                                                                                             |
| 0.080658059 | 1 | NULL | p.D1736N | ENST00000296440 | PLXNB1    | Plexins                                                                                                                                  |
| 0.07833203  | 1 | NULL | p.V1539F | ENST00000256935 | DOCK2     | Unclassified                                                                                                                             |
| 0.070803402 | 1 | NULL | p.R83L   | ENST00000412916 | CBFB      | Unclassified                                                                                                                             |
| 0.051679474 | 1 | NULL | p.T175I  | ENST00000510038 | H2AFY     | Histones                                                                                                                                 |
| 0.04577959  | 1 | NULL | p.E966Q  | ENST00000426016 | SOS1      | Pleckstrin_homology_domain_containing Rho_guanine_nucleotide_exchange_factors                                                            |
| 0.042924769 | 1 | NULL | p.E352K  | ENST00000287820 | PPARG     | Nuclear_hormone_receptors                                                                                                                |
| 0.040096506 | 1 | NULL | p.R800I  | ENST00000397843 | ARHGEF12  | Rho_guanine_nucleotide_exchange_factors                                                                                                  |
| 0.033475404 | 1 | NULL | p.R720H  | ENST00000321117 | DNMT3A    | Unclassified                                                                                                                             |
| 0.032849911 | 1 | NULL | p.Q211R  | ENST00000395755 | IL21R     | CD_molecules Interleukin_receptors                                                                                                       |
| 0.032101341 | 1 | NULL | p.E499D  | ENST00000602748 | CUL1      | Unclassified                                                                                                                             |
| 0.02924737  | 1 | NULL | p.Y1848C | ENST00000382044 | TP53BP1   | Unclassified                                                                                                                             |
| 0.025703836 | 1 | NULL | p.L442V  | ENST00000402690 | SMAD2     | SMAD_family                                                                                                                              |
| 0.024220866 | 1 | NULL | p.I1534S | ENST00000256935 | DOCK2     | Unclassified                                                                                                                             |
| 0.022762645 | 1 | NULL | p.D33Y   | ENST00000264497 | IL21      | Interleukins                                                                                                                             |
| 0.022577137 | 1 | NULL | p.A53V   | ENST00000303910 | HIST1H2AE | Histones                                                                                                                                 |
| 0.021345867 | 1 | NULL | p.S257P  | ENST00000380488 | ASB9      | Ankyrin_repeat_domain_containing                                                                                                         |
| 0.020723168 | 1 | NULL | p.P376S  | ENST00000370360 | GLMN      | Unclassified                                                                                                                             |
| 0.020063756 | 1 | NULL | p.R577Q  | ENST00000602748 | CUL1      | Unclassified                                                                                                                             |
| 0.018918775 | 1 | NULL | p.E384K  | ENST00000377970 | MYC       | Basic_helix-loop-helix_proteins                                                                                                          |
| 0.018680101 | 1 | NULL | p.L1531P | ENST00000256935 | DOCK2     | Unclassified                                                                                                                             |
| 0.018591619 | 1 | NULL | p.F418L  | ENST00000355622 | TLR4      | CD_molecules                                                                                                                             |
| 0.013223596 | 1 | NULL | p.D510G  | ENST00000602748 | CUL1      | Unclassified                                                                                                                             |
| 0.013207932 | 1 | NULL | p.S415I  | ENST00000355622 | TLR4      | CD_molecules                                                                                                                             |
| 0.011960055 | 1 | NULL | p.D291N  | ENST00000367980 | NR1I3     | Nuclear_hormone_receptors                                                                                                                |
| 0.009146971 | 1 | NULL | p.L31M   | ENST00000349496 | CTNBN1    | Armadillo_repeat_containing                                                                                                              |
| 0.008290971 | 1 | NULL | p.Y87S   | ENST00000393331 | SPOP      | BTB_(POZ)_domain_containing                                                                                                              |

**Supplementary Table 23. Sample association table of three HUGO genes and UniProt ID, PDB IDs and transcript IDs**

| <b>HUGO Gene</b> | <b>UniProt ID</b> | <b>PDB IDs</b>                                    | <b>Transcript IDs</b> |
|------------------|-------------------|---------------------------------------------------|-----------------------|
| PIK3CA           | P42336            | 2ENQ 2RDO 3HHM 3HIZ 3ZIM                          | ENST00000263967 100%  |
| A1CF             | Q9NQ94            | 2CPD                                              | ENST00000282641 100%  |
|                  |                   |                                                   | ENST00000373993 100%  |
|                  |                   |                                                   | ENST00000337664 100%  |
| AADAT            | Q8N5Z0            | 2QLR 2R2N 2VGZ 2XH1 3DC1 3UE8 4GDY 4GE4 4GE7 4GE9 | ENST00000353187 100%  |
|                  |                   |                                                   | ENST00000515480 100%  |



Supplementary Table 24.

Due to size restrictions, this table could not be included. For additional information, please contact the corresponding author.
